# Supplementary material
Source: PubMed Central journal article supplement (PMC3116287)
Supplement: emboj2011157s2.pdf [file emboj2011157s2.pdf]

| Plate | Well | AmbID | GeneID  | F. Luc      | R. Luc      | Ratio       |
|-------|------|-------|---------|-------------|-------------|-------------|
| 1     | A01  |       | DIAP1   | 0.446157    | 0.007226    | 61.74328813 |
| 1     | A02  |       | ex/ft   | 48.62628333 | 0.036262333 | 1340.958478 |
| 1     | A03  |       | Luc     | 2.315564    | 0.055149    | 41.98741591 |
| 1     | A04  |       | hpo     | 35.42780667 | 0.040405    | 876.8173906 |
| 1     | A05  | 31828 | CG40406 | 12.82344667 | 0.042326667 | 302.9637738 |
| 1     | A06  | 32228 | CG13681 | 10.97286767 | 0.047599667 | 230.5240443 |
| 1     | A07  | 31836 | CG40221 | 10.569676   | 0.055869    | 189.1867762 |
| 1     | A08  | 32244 | CG13721 | 11.95143    | 0.049461667 | 241.6301513 |
| 1     | A09  | 31844 | CG40225 | 13.48906    | 0.051192    | 263.4993749 |
| 1     | A10  | 32252 | CG13738 | 10.216988   | 0.051207333 | 199.5219695 |
| 1     | A11  | 31852 | CG40112 | 12.53947667 | 0.038506333 | 325.647123  |
| 1     | A12  | 32260 | CG13766 | 11.37020767 | 0.040729    | 279.1673664 |
| 1     | A13  | 31884 | CG33172 | 13.4745     | 0.043701667 | 308.3292018 |
| 1     | A14  | 32268 | CG13786 | 9.590660333 | 0.041600667 | 230.541025  |
| 1     | A15  | 31892 | CG32971 | 11.64573767 | 0.039619    | 293.9432511 |
| 1     | A16  | 32284 | CG13829 | 9.236582667 | 0.036967    | 249.8602177 |
| 1     | A17  | 31900 | CG32670 | 13.48580667 | 0.040226667 | 335.2454425 |
| 1     | A18  | 32292 | CG14383 | 12.23639667 | 0.037149    | 329.3869732 |
| 1     | A19  | 31916 | CG40108 | 13.17111    | 0.038133333 | 345.3962413 |
| 1     | A20  | 32300 | CG14405 | 12.44975333 | 0.032967    | 377.6428954 |
| 1     | A21  | 31876 | CG40127 | 11.743277   | 0.030399667 | 386.2962423 |
| 1     | A22  | 32220 | CG13654 | 12.43315767 | 0.040857    | 304.3091188 |
| 1     | A23  | 31860 | CG40232 | 14.07116333 | 0.042397667 | 331.8853239 |
| 1     | A24  | 32276 | CG13810 | 12.82624333 | 0.039003667 | 328.8471169 |
| 1     | B01  |       | DIAP1   | 0.46668     | 0.010130333 | 46.0675858  |
| 1     | B02  |       | ex/ft   | 42.58233333 | 0.047502667 | 896.4198501 |
| 1     | B03  |       | Luc     | 1.859856    | 0.051530333 | 36.0924504  |
| 1     | B04  |       | hpo     | 35.99187    | 0.044199    | 814.3141248 |
| 1     | B05  | 31932 | CG40115 | 14.11871333 | 0.048498333 | 291.1174954 |
| 1     | B06  | 29211 | CG30033 | 11.67382    | 0.051130667 | 228.3134714 |
| 1     | B07  | 31940 | CG40088 | 12.77059667 | 0.051722333 | 246.9068165 |
| 1     | B08  | 29213 | CG30058 | 12.89364    | 0.04754     | 271.2166597 |
| 1     | B09  | 31948 | CG40050 | 11.39925    | 0.050199333 | 227.0797089 |
| 1     | B10  | 29214 | CG30075 | 13.15804333 | 0.063443333 | 207.3983607 |
| 1     | B11  | 31956 | CG33127 | 12.00706    | 0.043355333 | 276.945397  |
| 1     | B12  | 29215 | CG30086 | 14.53528333 | 0.055775333 | 260.60415   |
| 1     | B13  | 31964 | CG32854 | 15.43981333 | 0.048848333 | 316.0765635 |
| 1     | B14  | 29216 | CG30100 | 15.96659667 | 0.048476    | 329.3711665 |
| 1     | B15  | 31996 | CG3706  | 12.54106333 | 0.046015    | 272.5429389 |
| 1     | B16  | 29208 | CG30159 | 11.35936    | 0.043648333 | 260.2472794 |
| 1     | B17  | 31924 | CG32798 | 12.64172    | 0.041555    | 304.2165804 |
| 1     | B18  | 29212 | CG30047 | 11.51537    | 0.033972667 | 338.9598501 |
| 1     | B19  | 32004 | CG32691 | 13.80417333 | 0.035862    | 384.9248043 |
| 1     | B20  | 29209 | CG2981  | 11.05641833 | 0.039342    | 281.0334587 |
| 1     | B21  | 32013 | CG32579 | 14.58135    | 0.038718    | 376.6039052 |
| 1     | B22  | 29291 | CG30158 | 11.386325   | 0.033643333 | 338.4422372 |
| 1     | B23  | 31981 | CG40336 | 11.06116333 | 0.036846    | 300.1998408 |
| 1     | B24  | 28740 | CG1511  | 13.19897    | 0.037630333 | 350.7534702 |
| 1     | C01  | 31868 | CG40311 | 11.58978567 | 0.050568667 | 229.1890696 |
| 1     | C02  | 32213 | CG13634 | 10.54876133 | 0.049365667 | 213.6861922 |
| 1     | C03  | 31908 | CG32633 | 8.983130333 | 0.054348667 | 165.2870417 |
| 1     | C04  | 32237 | CG13704 | 9.111665667 | 0.056718667 | 160.646683  |
| 1     | C05  | 31829 | CG30503 | 10.63336867 | 0.055822    | 190.4870601 |

|   |     |       |         |             |             |             |
|---|-----|-------|---------|-------------|-------------|-------------|
| 1 | C06 | 32229 | CG13687 | 9.993940667 | 0.059752333 | 167.2560737 |
| 1 | C07 | 31837 | CG32750 | 8.705334    | 0.043805667 | 198.7262074 |
| 1 | C08 | 32245 | CG13723 | 9.466584    | 0.052873667 | 179.0415645 |
| 1 | C09 | 31845 | CG32754 | 10.13468467 | 0.057637667 | 175.8344023 |
| 1 | C10 | 32253 | CG13740 | 9.702357    | 0.045762667 | 212.0146772 |
| 1 | C11 | 31853 | CG40386 | 9.276308333 | 0.049665333 | 186.7763229 |
| 1 | C12 | 32261 | CG13771 | 9.965360333 | 0.056775667 | 175.5216789 |
| 1 | C13 | 31885 | CG40439 | 10.76262    | 0.056877333 | 189.225116  |
| 1 | C14 | 32269 | CG13787 | 8.769796    | 0.048406333 | 181.1704254 |
| 1 | C15 | 31893 | CG32814 | 10.94226467 | 0.048905    | 223.7453157 |
| 1 | C16 | 32285 | CG13835 | 9.436448667 | 0.047937    | 196.8510476 |
| 1 | C17 | 31901 | CG31929 | 11.073358   | 0.050639    | 218.6725251 |
| 1 | C18 | 32293 | CG14384 | 8.320512667 | 0.046197    | 180.1093722 |
| 1 | C19 | 31917 | CG40381 | 10.97228333 | 0.048890667 | 224.4249073 |
| 1 | C20 | 32301 | CG14416 | 10.910773   | 0.044559333 | 244.8594309 |
| 1 | C21 | 31877 | CG32656 | 13.6217     | 0.042857333 | 317.8382541 |
| 1 | C22 | 32221 | CG13659 | 9.297559333 | 0.048268333 | 192.6223404 |
| 1 | C23 | 31861 | CG40085 | 10.26129833 | 0.038229333 | 268.414263  |
| 1 | C24 | 32277 | CG13811 | 9.506306667 | 0.040716667 | 233.4745804 |
| 1 | D01 | 31989 | CG40384 | 12.42202    | 0.067168667 | 184.937719  |
| 1 | D02 | 29222 | CG12052 | 13.04801333 | 0.060994333 | 213.9217304 |
| 1 | D03 | 31972 | CG40329 | 11.88303667 | 0.046595667 | 255.0245016 |
| 1 | D04 | 29218 | CG30121 | 9.223011333 | 0.063871667 | 144.3991024 |
| 1 | D05 | 31933 | CG40389 | 9.679296667 | 0.049487333 | 195.5913971 |
| 1 | D06 | 29223 | CG30034 | 10.50272    | 0.056675333 | 185.3137755 |
| 1 | D07 | 31941 | CG14052 | 9.720662    | 0.060633333 | 160.3187795 |
| 1 | D08 | 29225 | CG30060 | 11.85896667 | 0.054641667 | 217.0315693 |
| 1 | D09 | 31949 | CG40167 | 8.803676    | 0.056839667 | 154.88613   |
| 1 | D10 | 29226 | CG30076 | 9.631002667 | 0.060301333 | 159.714589  |
| 1 | D11 | 31957 | CG32806 | 11.17555333 | 0.057307    | 195.0120113 |
| 1 | D12 | 29227 | CG30087 | 10.23570233 | 0.041825    | 244.7268938 |
| 1 | D13 | 31965 | CG40178 | 9.979895    | 0.060334667 | 165.4089689 |
| 1 | D14 | 29228 | CG30103 | 10.213873   | 0.046998667 | 217.322612  |
| 1 | D15 | 31997 | CG32719 | 9.308543    | 0.053229333 | 174.8761898 |
| 1 | D16 | 29220 | CG30163 | 10.20808767 | 0.051635667 | 197.694507  |
| 1 | D17 | 31925 | CG40385 | 9.853772667 | 0.052002    | 189.4883402 |
| 1 | D18 | 29224 | CG30048 | 10.19160333 | 0.044000667 | 231.623839  |
| 1 | D19 | 31979 | CG40103 | 9.704865    | 0.051288667 | 189.2204581 |
| 1 | D20 | 29221 | CG2988  | 8.616699    | 0.041880333 | 205.745712  |
| 1 | D21 | 32014 | CG32695 | 11.27786667 | 0.047497    | 237.4437684 |
| 1 | D22 | 28736 | CG15065 | 9.948886333 | 0.047370667 | 210.0220882 |
| 1 | D23 | 31982 | CG40189 | 9.566998    | 0.042713333 | 223.9815358 |
| 1 | D24 | 28752 | CG15110 | 11.44817667 | 0.043023333 | 266.0922755 |
| 1 | E01 | 31875 | CG40010 | 10.80656233 | 0.063021667 | 171.473763  |
| 1 | E02 | 32214 | CG13640 | 9.90153     | 0.054214333 | 182.6367566 |
| 1 | E03 | 31915 | CG32794 | 10.51209    | 0.058727    | 178.9992678 |
| 1 | E04 | 32238 | CG13707 | 8.760987667 | 0.061969333 | 141.3761807 |
| 1 | E05 | 31830 | CG40218 | 21.65583667 | 0.096654667 | 224.0537101 |
| 1 | E06 | 32230 | CG13689 | 10.64350167 | 0.059811333 | 177.9512523 |
| 1 | E07 | 31838 | CG40338 | 10.22977467 | 0.050776    | 201.4686991 |
| 1 | E08 | 32246 | CG13724 | 12.64960333 | 0.063437    | 199.4041858 |
| 1 | E09 | 31846 | CG33191 | 9.697032    | 0.059157667 | 163.9184327 |
| 1 | E10 | 32254 | CG13741 | 9.077585667 | 0.056323667 | 161.1682301 |
| 1 | E11 | 31854 | CG40081 | 8.028287333 | 0.045464333 | 176.5842968 |

|   |     |       |         |             |             |             |
|---|-----|-------|---------|-------------|-------------|-------------|
| 1 | E12 | 32262 | CG13773 | 5.730925    | 0.051426333 | 111.4395025 |
| 1 | E13 | 31886 | CG40134 | 9.493523    | 0.056778667 | 167.2022884 |
| 1 | E14 | 32270 | CG13788 | 8.259020667 | 0.053242    | 155.1222844 |
| 1 | E15 | 31894 | CG40138 | 10.129181   | 0.043251    | 234.1953018 |
| 1 | E16 | 32286 | CG13836 | 10.98416533 | 0.049096667 | 223.7252767 |
| 1 | E17 | 31902 | CG40374 | 11.02665667 | 0.056132667 | 196.4392095 |
| 1 | E18 | 32294 | CG14390 | 8.333024    | 0.051593    | 161.5146241 |
| 1 | E19 | 31918 | CG32637 | 10.712499   | 0.053091333 | 201.7749099 |
| 1 | E20 | 32302 | CG14417 | 10.502599   | 0.044992667 | 233.4291292 |
| 1 | E21 | 31878 | CG33093 | 9.698352333 | 0.055249667 | 175.5368479 |
| 1 | E22 | 32222 | CG13663 | 11.00985267 | 0.050097    | 219.7706982 |
| 1 | E23 | 31862 | CG32720 | 8.235279333 | 0.046983667 | 175.279622  |
| 1 | E24 | 32278 | CG13814 | 9.949505667 | 0.042146667 | 236.0686254 |
| 1 | F01 | 31990 | CG3206  | 10.138595   | 0.071565333 | 141.6690809 |
| 1 | F02 | 29234 | CG30018 | 8.889339333 | 0.060661    | 146.5412593 |
| 1 | F03 | 31973 | CG40181 | 9.570893    | 0.056522333 | 169.3294037 |
| 1 | F04 | 29255 | CG30154 | 8.863127333 | 0.061576    | 143.938017  |
| 1 | F05 | 31934 | CG32603 | 3.882450333 | 0.056630667 | 68.55738351 |
| 1 | F06 | 29235 | CG30036 | 9.851427333 | 0.058912667 | 167.2208693 |
| 1 | F07 | 31942 | CG31266 | 8.900820333 | 0.054419667 | 163.5588911 |
| 1 | F08 | 29237 | CG30062 | 9.710811    | 0.063272    | 153.4772253 |
| 1 | F09 | 31950 | CG33007 | 7.464238333 | 0.051199333 | 145.7878032 |
| 1 | F10 | 29238 | CG30079 | 9.619870333 | 0.051323333 | 187.436585  |
| 1 | F11 | 31958 | CG14631 | 9.946577667 | 0.056476333 | 176.1193951 |
| 1 | F12 | 29239 | CG30088 | 7.565650333 | 0.047225667 | 160.2020864 |
| 1 | F13 | 31966 | CG40294 | 9.408872333 | 0.054655333 | 172.1492078 |
| 1 | F14 | 29240 | CG30105 | 8.240326    | 0.052123667 | 158.0918329 |
| 1 | F15 | 31998 | CG40042 | 8.600849    | 0.060409333 | 142.3761615 |
| 1 | F16 | 29232 | CG30164 | 10.407563   | 0.051975667 | 200.239144  |
| 1 | F17 | 31926 | CG40228 | 11.69779333 | 0.057227333 | 204.4091984 |
| 1 | F18 | 29277 | CG2960  | 1.024516667 | 0.039105    | 26.19912202 |
| 1 | F19 | 32006 | CG14096 | 9.756578333 | 0.041592667 | 234.5744843 |
| 1 | F20 | 29207 | CG30143 | 9.314661    | 0.046345667 | 200.98235   |
| 1 | F21 | 31987 | CG40415 | 9.416050333 | 0.050978333 | 184.7069082 |
| 1 | F22 | 28748 | CG33147 | 9.370849667 | 0.048803333 | 192.0124923 |
| 1 | F23 | 31983 | CG12563 | 10.71601133 | 0.045410333 | 235.9817809 |
| 1 | F24 | 28764 | CG15121 | 9.246075667 | 0.036568    | 252.8460858 |
| 1 | G01 | 31870 | CG4381  | 13.79141333 | 0.053892    | 255.9083599 |
| 1 | G02 | 32215 | CG13643 | 12.15495333 | 0.063422333 | 191.6509957 |
| 1 | G03 | 31910 | CG40337 | 13.05134667 | 0.05568     | 234.3991858 |
| 1 | G04 | 32239 | CG13711 | 13.72192    | 0.062467333 | 219.6655319 |
| 1 | G05 | 31831 | CG40334 | 13.56753333 | 0.054481667 | 249.0293371 |
| 1 | G06 | 32231 | CG13692 | 12.41807    | 0.049900333 | 248.8574559 |
| 1 | G07 | 31839 | CG14302 | 12.09385467 | 0.04893     | 247.1664555 |
| 1 | G08 | 32247 | CG13725 | 13.82106667 | 0.054129    | 255.3357104 |
| 1 | G09 | 31847 | CG17018 | 12.67136333 | 0.051809667 | 244.5752723 |
| 1 | G10 | 32255 | CG13742 | 12.05778333 | 0.0545      | 221.2437309 |
| 1 | G11 | 31855 | CG40198 | 12.89806    | 0.044472333 | 290.0243597 |
| 1 | G12 | 32263 | CG13775 | 13.20032333 | 0.044276667 | 298.132726  |
| 1 | G13 | 31887 | CG40367 | 13.40079667 | 0.046005667 | 291.2857836 |
| 1 | G14 | 32271 | CG13789 | 17.38356333 | 0.063237    | 274.8954462 |
| 1 | G15 | 31895 | CG32667 | 12.06765    | 0.039210333 | 307.7670852 |
| 1 | G16 | 32287 | CG13838 | 11.68377667 | 0.041211667 | 283.5065313 |
| 1 | G17 | 31903 | CG31477 | 15.09010667 | 0.044843    | 336.5097488 |

|   |     |       |         |             |             |             |
|---|-----|-------|---------|-------------|-------------|-------------|
| 1 | G18 | 32295 | CG14391 | 13.93314    | 0.042448    | 328.2401998 |
| 1 | G19 | 31919 | CG32712 | 15.02405333 | 0.041530333 | 361.7609619 |
| 1 | G20 | 32303 | CG14422 | 14.01766667 | 0.046123    | 303.9192305 |
| 1 | G21 | 31879 | CG3191  | 12.91859333 | 0.033988333 | 380.0890502 |
| 1 | G22 | 32223 | CG13664 | 13.70388433 | 0.038131333 | 359.3864451 |
| 1 | G23 | 31863 | CG40044 | 14.68238333 | 0.037823333 | 388.1832202 |
| 1 | G24 | 32283 | CG13828 | 13.46758333 | 0.039182667 | 343.7127812 |
| 1 | H01 | 31991 | CG40196 | 14.05716    | 0.054248333 | 259.1261175 |
| 1 | H02 | 29246 | CG30022 | 11.04080733 | 0.050793    | 217.3686794 |
| 1 | H03 | 31974 | CG40445 | 12.12460133 | 0.064484    | 188.0249571 |
| 1 | H04 | 29242 | CG30125 | 10.121902   | 0.049813333 | 203.1966408 |
| 1 | H05 | 31935 | CG33198 | 9.129689    | 0.036969667 | 246.9508065 |
| 1 | H06 | 29247 | CG30037 | 10.364233   | 0.046243    | 224.125446  |
| 1 | H07 | 31943 | CG40396 | 11.88478667 | 0.048545333 | 244.8183142 |
| 1 | H08 | 29249 | CG33156 | 9.349512333 | 0.049152333 | 190.2150254 |
| 1 | H09 | 31951 | CG32802 | 12.08887667 | 0.046336333 | 260.8941148 |
| 1 | H10 | 29250 | CG30080 | 11.65076    | 0.054832667 | 212.4784496 |
| 1 | H11 | 31959 | CG32775 | 13.30973333 | 0.049304333 | 269.9505791 |
| 1 | H12 | 29251 | CG30093 | 11.70329    | 0.048795333 | 239.8444523 |
| 1 | H13 | 31967 | CG40137 | 12.68070333 | 0.052473    | 241.6614894 |
| 1 | H14 | 29252 | CG30108 | 10.17270233 | 0.040512333 | 251.1013683 |
| 1 | H15 | 31999 | CG32571 | 13.24723333 | 0.053187    | 249.0690081 |
| 1 | H16 | 29244 | CG30165 | 13.15182    | 0.042199667 | 311.6569641 |
| 1 | H17 | 31927 | CG40080 | 10.29517033 | 0.045969    | 223.9589796 |
| 1 | H18 | 29248 | CG30050 | 13.75906    | 0.041392667 | 332.4033243 |
| 1 | H19 | 32007 | CG32650 | 13.13208667 | 0.042600667 | 308.2601211 |
| 1 | H20 | 29245 | CG30001 | 16.63653    | 0.040827333 | 407.4850999 |
| 1 | H21 | 32016 | CG40399 | 13.27836333 | 0.036375333 | 365.0375712 |
| 1 | H22 | 28760 | CG15080 | 13.53156    | 0.039683667 | 340.985628  |
| 1 | H23 | 29205 | CG2859  | 8.950750667 | 0.037451333 | 238.9968492 |
| 1 | H24 | 28776 | CG15124 | 12.22475667 | 0.050472667 | 242.2054842 |
| 1 | I01 | 31871 | CG40123 | 13.74736667 | 0.061136667 | 224.8628755 |
| 1 | I02 | 32216 | CG13650 | 10.50416833 | 0.048907333 | 214.7769591 |
| 1 | I03 | 31911 | CG12102 | 14.53129333 | 0.082972667 | 175.1334978 |
| 1 | I04 | 32240 | CG13712 | 13.33992    | 0.055823667 | 238.9653134 |
| 1 | I05 | 31832 | CG18817 | 14.57864667 | 0.057264    | 254.5865931 |
| 1 | I06 | 32232 | CG13693 | 11.89480333 | 0.053698333 | 221.5115925 |
| 1 | I07 | 31840 | CG40413 | 13.16453    | 0.059327333 | 221.8965401 |
| 1 | I08 | 32248 | CG13726 | 9.175511333 | 0.048542    | 189.0221114 |
| 1 | I09 | 31848 | CG32987 | 13.52452667 | 0.053450333 | 253.0297909 |
| 1 | I10 | 32256 | CG13743 | 10.945194   | 0.053933333 | 202.9393201 |
| 1 | I11 | 31856 | CG40157 | 10.50948033 | 0.043492    | 241.6416889 |
| 1 | I12 | 32264 | CG13776 | 12.85040667 | 0.047218667 | 272.1467499 |
| 1 | I13 | 31888 | CG32591 | 11.21236667 | 0.054301333 | 206.484187  |
| 1 | I14 | 32272 | CG13790 | 12.31116    | 0.04999     | 246.2724545 |
| 1 | I15 | 31896 | CG40370 | 12.16237667 | 0.044093333 | 275.8325522 |
| 1 | I16 | 32288 | CG13858 | 12.61405667 | 0.047958667 | 263.0193361 |
| 1 | I17 | 31904 | CG31056 | 12.98275667 | 0.042179333 | 307.7990011 |
| 1 | I18 | 32296 | CG14394 | 11.338513   | 0.045980667 | 246.5930536 |
| 1 | I19 | 31920 | CG18139 | 11.155056   | 0.041985667 | 265.6872425 |
| 1 | I20 | 32304 | CG14424 | 10.23156333 | 0.039066333 | 261.90232   |
| 1 | I21 | 31880 | CG3034  | 8.927562667 | 0.033183    | 269.0402515 |
| 1 | I22 | 32224 | CG13671 | 12.23026667 | 0.050375667 | 242.781237  |
| 1 | I23 | 31864 | CG40160 | 13.85873333 | 0.041356667 | 335.1027646 |

|   |     |       |         |             |             |             |
|---|-----|-------|---------|-------------|-------------|-------------|
| 1 | I24 | 32280 | CG13825 | 12.61931    | 0.040967333 | 308.0334738 |
| 1 | J01 | 31992 | CG40155 | 13.12543333 | 0.067285    | 195.0722053 |
| 1 | J02 | 29258 | CG30026 | 9.904062    | 0.050942333 | 194.4171252 |
| 1 | J03 | 31975 | CG40298 | 11.53196667 | 0.052007667 | 221.7358979 |
| 1 | J04 | 29254 | CG30127 | 13.18864667 | 0.055196333 | 238.9406301 |
| 1 | J05 | 31936 | CG32836 | 13.37008667 | 0.061339333 | 217.9692204 |
| 1 | J06 | 29259 | CG30039 | 11.60403467 | 0.057258333 | 202.6610624 |
| 1 | J07 | 31944 | CG32651 | 11.730538   | 0.054887667 | 213.719014  |
| 1 | J08 | 29261 | CG30065 | 10.50226167 | 0.05626     | 186.6736876 |
| 1 | J09 | 31952 | CG32655 | 12.5854     | 0.056863667 | 221.3258613 |
| 1 | J10 | 29262 | CG30081 | 10.17695033 | 0.054712333 | 186.0083406 |
| 1 | J11 | 31960 | CG32734 | 11.82269333 | 0.04791     | 246.7688026 |
| 1 | J12 | 29263 | CG30094 | 12.66072    | 0.051458333 | 246.0382834 |
| 1 | J13 | 31968 | CG40400 | 12.04326667 | 0.050985667 | 236.2088692 |
| 1 | J14 | 29264 | CG30109 | 11.50815667 | 0.044250333 | 260.069378  |
| 1 | J15 | 32000 | CG32835 | 11.592061   | 0.043827667 | 264.4918583 |
| 1 | J16 | 29256 | CG30166 | 12.11960333 | 0.041577667 | 291.4931093 |
| 1 | J17 | 31928 | CG40303 | 11.11753067 | 0.045034333 | 246.867886  |
| 1 | J18 | 29260 | CG30051 | 13.52353    | 0.049242333 | 274.6321932 |
| 1 | J19 | 32008 | CG14476 | 9.888057667 | 0.041299667 | 239.4222149 |
| 1 | J20 | 29257 | CG30004 | 11.38087667 | 0.039948333 | 284.8898995 |
| 1 | J21 | 32017 | CG40241 | 12.6498     | 0.038849    | 325.6145589 |
| 1 | J22 | 28772 | CG15085 | 19.37247    | 0.036000333 | 538.1191841 |
| 1 | J23 | 29217 | CG2862  | 11.88848433 | 0.036917    | 322.0327853 |
| 1 | J24 | 28788 | CG15126 | 12.65399667 | 0.035720667 | 354.2486142 |
| 1 | K02 | 32217 | CG13651 | 17.26008    | 0.052817333 | 326.7881756 |
| 1 | K03 | 31912 | CG40265 | 14.56641    | 0.058378333 | 249.5174009 |
| 1 | K04 | 32241 | CG13715 | 15.26228333 | 0.055475333 | 275.1183709 |
| 1 | K05 | 31833 | CG32822 | 13.15063667 | 0.057108333 | 230.2752663 |
| 1 | K06 | 32233 | CG13694 | 13.22265333 | 0.063724    | 207.4987969 |
| 1 | K07 | 31841 | CG32679 | 13.57783333 | 0.058305333 | 232.874637  |
| 1 | K08 | 32249 | CG13727 | 12.03443    | 0.053941333 | 223.1021974 |
| 1 | K09 | 31849 | CG40300 | 12.65421333 | 0.053190333 | 237.9043811 |
| 1 | K1  | 31872 | CG40397 | 11.27004467 | 0.047236    | 238.5901572 |
| 1 | K10 | 32257 | CG13746 | 21.09602667 | 0.061413667 | 343.507037  |
| 1 | K11 | 31857 | CG40420 | 14.07511667 | 0.055568    | 253.2953618 |
| 1 | K12 | 32265 | CG13780 | 2.780476    | 0.047514667 | 58.51826804 |
| 1 | K13 | 31889 | CG32855 | 14.28643    | 0.057910667 | 246.6977298 |
| 1 | K14 | 32273 | CG13791 | 11.45739133 | 0.051578333 | 222.1357418 |
| 1 | K15 | 31897 | CG40213 | 14.11853667 | 0.047148    | 299.4514437 |
| 1 | K16 | 32289 | CG14376 | 13.67904    | 0.049412333 | 276.8345285 |
| 1 | K17 | 31905 | CG32821 | 13.56200333 | 0.047104333 | 287.9141339 |
| 1 | K18 | 32297 | CG14400 | 15.30846    | 0.048417667 | 316.1750876 |
| 1 | K19 | 31921 | CG40416 | 14.34379    | 0.043146667 | 332.4425989 |
| 1 | K20 | 32305 | CG14431 | 12.5565     | 0.046368667 | 270.79709   |
| 1 | K21 | 31881 | CG40130 | 12.08992333 | 0.039223333 | 308.2329396 |
| 1 | K22 | 32225 | CG13672 | 14.21467667 | 0.045607333 | 311.6752423 |
| 1 | K23 | 31865 | CG9669  | 9.367587    | 0.044789667 | 209.1461647 |
| 1 | K24 | 32281 | CG13826 | 11.03581667 | 0.045261    | 243.8261785 |
| 1 | L01 | 31993 | CG9126  | 12.969073   | 0.040749333 | 318.2646669 |
| 1 | L02 | 29270 | CG30027 | 15.23779667 | 0.060890333 | 250.2498481 |
| 1 | L03 | 31985 | CG32985 | 14.90624667 | 0.065179    | 228.6970752 |
| 1 | L04 | 29266 | CG30130 | 11.35029333 | 0.064376333 | 176.3115845 |
| 1 | L05 | 31937 | CG40002 | 12.00844667 | 0.053377667 | 224.9713676 |

|   |     |       |         |             |             |             |
|---|-----|-------|---------|-------------|-------------|-------------|
| 1 | L06 | 29271 | CG33012 | 12.42789667 | 0.055153    | 225.3349168 |
| 1 | L07 | 31945 | CG40239 | 13.09400667 | 0.050396667 | 259.8189034 |
| 1 | L08 | 29273 | CG30071 | 11.67677633 | 0.052446    | 222.6437923 |
| 1 | L09 | 31953 | CG32614 | 11.043139   | 0.053063333 | 208.1124254 |
| 1 | L10 | 29274 | CG30082 | 11.92336333 | 0.046506333 | 256.3814964 |
| 1 | L11 | 31961 | CG40290 | 15.10342667 | 0.040671667 | 371.3500799 |
| 1 | L12 | 29275 | CG30095 | 14.01377333 | 0.052482667 | 267.0171739 |
| 1 | L13 | 31969 | CG32625 | 11.0811     | 0.047715667 | 232.2319015 |
| 1 | L14 | 29276 | CG30110 | 14.64226667 | 0.045103    | 324.6406374 |
| 1 | L15 | 32001 | CG40159 | 11.30872667 | 0.054547333 | 207.3195146 |
| 1 | L16 | 29268 | CG30172 | 13.03876333 | 0.045101333 | 289.0992875 |
| 1 | L17 | 31929 | CG1545  | 13.26486333 | 0.047574    | 278.8258993 |
| 1 | L18 | 29272 | CG30054 | 12.54475667 | 0.042189    | 297.3466227 |
| 1 | L19 | 32009 | CG40090 | 14.08232333 | 0.042048    | 334.9106577 |
| 1 | L20 | 29243 | CG30153 | 12.95429333 | 0.041586333 | 311.503619  |
| 1 | L21 | 32018 | CG40053 | 12.70177    | 0.040481    | 313.7711519 |
| 1 | L22 | 28784 | CG15094 | 15.72727    | 0.042106    | 373.516126  |
| 1 | L23 | 29229 | CG40147 | 12.09605167 | 0.038549333 | 313.7810857 |
| 1 | L24 | 28808 | CG15107 | 13.16437333 | 0.042372333 | 310.6832288 |
| 1 | M01 | 31873 | CG40092 | 14.26947667 | 0.062270333 | 229.1536901 |
| 1 | M02 | 32218 | CG13652 | 11.97918333 | 0.054245667 | 220.8320788 |
| 1 | M03 | 31913 | CG31936 | 12.62754667 | 0.055504    | 227.5069665 |
| 1 | M04 | 32242 | CG13716 | 10.628732   | 0.048563    | 218.8648148 |
| 1 | M05 | 31834 | CG40262 | 12.55558067 | 0.056481    | 222.2974216 |
| 1 | M06 | 32234 | CG13699 | 11.54224    | 0.060035    | 192.2585159 |
| 1 | M07 | 31842 | CG40109 | 13.89603    | 0.051215    | 271.3273455 |
| 1 | M08 | 32250 | CG13733 | 13.45176333 | 0.050679333 | 265.4289717 |
| 1 | M09 | 31850 | CG40153 | 13.21353    | 0.049505667 | 266.9094447 |
| 1 | M10 | 32258 | CG13747 | 11.131008   | 0.043629667 | 255.1247546 |
| 1 | M11 | 31858 | CG32686 | 12.75510333 | 0.047394667 | 269.1252884 |
| 1 | M12 | 32266 | CG13783 | 12.52836667 | 0.05226     | 239.7314709 |
| 1 | M13 | 31890 | CG40442 | 13.61603    | 0.043598333 | 312.3062044 |
| 1 | M14 | 32274 | CG13792 | 12.01187333 | 0.048476333 | 247.7884053 |
| 1 | M15 | 31898 | CG32595 | 10.15320333 | 0.046915333 | 216.4154576 |
| 1 | M16 | 32290 | CG14379 | 11.75736667 | 0.045339    | 259.3212613 |
| 1 | M17 | 31906 | CG40409 | 13.34308667 | 0.043311333 | 308.0737913 |
| 1 | M18 | 32298 | CG14401 | 12.01080867 | 0.040112333 | 299.4293193 |
| 1 | M19 | 31922 | CG32681 | 14.05848667 | 0.037538667 | 374.5068196 |
| 1 | M20 | 32306 | CG14445 | 11.92864    | 0.042407333 | 281.2871988 |
| 1 | M21 | 31882 | CG3226  | 17.60707    | 0.043246    | 407.1375387 |
| 1 | M22 | 32227 | CG13680 | 15.02465    | 0.039370667 | 381.6204111 |
| 1 | M23 | 32212 | CG13632 | 14.50144    | 0.043966333 | 329.8305522 |
| 1 | M24 | 32282 | CG13827 | 15.12102333 | 0.043085    | 350.9579513 |
| 1 | N01 | 31994 | CG32643 | 15.12506667 | 0.064992    | 232.721976  |
| 1 | N02 | 29282 | CG30030 | 10.014266   | 0.051122    | 195.8895583 |
| 1 | N03 | 31977 | CG32937 | 13.20457    | 0.074430333 | 177.4084491 |
| 1 | N04 | 29253 | CG2905  | 9.017527667 | 0.079633    | 113.2385778 |
| 1 | N05 | 31938 | CG40392 | 13.93096333 | 0.056978    | 244.4972329 |
| 1 | N06 | 29283 | CG30042 | 10.71910167 | 0.044451333 | 241.1424104 |
| 1 | N07 | 31946 | CG40091 | 14.25557667 | 0.051776    | 275.3317496 |
| 1 | N08 | 29285 | CG30072 | 11.29979333 | 0.051232    | 220.5612378 |
| 1 | N09 | 31954 | CG33051 | 6.272665333 | 0.065222333 | 96.17358062 |
| 1 | N10 | 29286 | CG30083 | 11.18436533 | 0.049735667 | 224.8761519 |
| 1 | N11 | 31962 | CG40133 | 10.389644   | 0.053690333 | 193.510514  |

|   |     |       |          |             |             |             |
|---|-----|-------|----------|-------------|-------------|-------------|
| 1 | N12 | 29287 | CG30096  | 14.93523333 | 0.0493      | 302.9459094 |
| 1 | N13 | 31970 | CG40212  | 16.60119    | 0.051366333 | 323.1920389 |
| 1 | N14 | 29288 | CG30111  | 12.67305333 | 0.046273333 | 273.8737934 |
| 1 | N15 | 32002 | CG40275  | 11.53680667 | 0.041285    | 279.4430584 |
| 1 | N16 | 29280 | CG30173  | 10.33492467 | 0.047717    | 216.5878967 |
| 1 | N17 | 31930 | CG32569  | 13.80755333 | 0.051071333 | 270.3581918 |
| 1 | N18 | 29279 | CG30157  | 13.64417333 | 0.041898    | 325.6521393 |
| 1 | N19 | 32010 | CG32462  | 13.54349    | 0.042860667 | 315.9887854 |
| 1 | N20 | 29281 | CG30010  | 10.819515   | 0.04159     | 260.1470305 |
| 1 | N21 | 32019 | CG32582  | 14.12812333 | 0.040054333 | 352.7239666 |
| 1 | N22 | 28796 | CG15100  | 11.00468667 | 0.041195667 | 267.1321417 |
| 1 | N23 | 29241 | CG2903   | 13.57117333 | 0.044497333 | 304.9884637 |
| 1 | N24 | 28820 | CG15109  | 12.78128    | 0.039545    | 323.2084966 |
| 1 | O01 | 31874 | CG32580  | 11.47538167 | 0.049387667 | 232.3531853 |
| 1 | O02 | 32219 | CG13653  | 9.881624333 | 0.064223    | 153.8642594 |
| 1 | O03 | 31914 | CG33105  | 10.50046933 | 0.057535667 | 182.5036528 |
| 1 | O04 | 32243 | CG13719  | 10.39050767 | 0.049191    | 211.2278195 |
| 1 | O05 | 31835 | CG32634  | 12.43851667 | 0.055427    | 224.4125907 |
| 1 | O06 | 32235 | CG13700  | 12.31181667 | 0.060588667 | 203.2032943 |
| 1 | O07 | 31843 | CG40382  | 12.23422333 | 0.060063667 | 203.6875871 |
| 1 | O08 | 32251 | CG13737  | 9.357310333 | 0.052904333 | 176.8722852 |
| 1 | O09 | 31851 | CG11639  | 13.23417    | 0.057509    | 230.1234589 |
| 1 | O10 | 32259 | CG13751  | 11.21653567 | 0.055313    | 202.7829925 |
| 1 | O11 | 31859 | CG40116  | 10.35272133 | 0.052640667 | 196.6677474 |
| 1 | O12 | 32267 | CG13784  | 10.96083667 | 0.050623333 | 216.5174821 |
| 1 | O13 | 31891 | CG14407  | 15.04575333 | 0.052821333 | 284.8423617 |
| 1 | O14 | 32275 | CG13800  | 10.95820733 | 0.042549667 | 257.5392052 |
| 1 | O15 | 31899 | CG40446  | 13.70787333 | 0.046229667 | 296.516811  |
| 1 | O16 | 32291 | CG14380  | 9.775560333 | 0.046573667 | 209.8945828 |
| 1 | O17 | 31907 | CG40378  | 11.83187967 | 0.041454667 | 285.4173153 |
| 1 | O18 | 32299 | CG14402  | 10.58092067 | 0.042310333 | 250.0788775 |
| 1 | O19 | 31923 | CG32945  | 13.19703    | 0.042211333 | 312.6418655 |
| 1 | O20 | 32307 | CG14448  | 9.524355667 | 0.045362333 | 209.9617671 |
| 1 | O21 |       | wts      | 57.80474333 | 0.03153     | 1833.325193 |
| 1 | O22 |       | HFA17794 | 1.400014667 | 0.010675667 | 131.140725  |
| 1 | O23 |       | hpo      | 37.94312    | 0.03136     | 1209.920918 |
| 1 | O24 |       | Luc      | 1.932734333 | 0.043465667 | 44.46576992 |
| 1 | P01 | 31995 | CG32602  | 7.496788667 | 0.086215667 | 86.95390242 |
| 1 | P02 | 29294 | CG30032  | 10.78393867 | 0.061397333 | 175.6418085 |
| 1 | P03 | 31978 | CG40260  | 10.379594   | 0.049227333 | 210.8502187 |
| 1 | P04 | 29265 | CG2944   | 11.38852767 | 0.060448667 | 188.3999813 |
| 1 | P05 | 31939 | CG40235  | 10.81934667 | 0.052634    | 205.558131  |
| 1 | P06 | 29295 | CG30045  | 11.79905    | 0.055450333 | 212.7859165 |
| 1 | P07 | 31947 | CG32727  | 9.858821667 | 0.059949667 | 164.4516511 |
| 1 | P08 | 29297 | CG30073  | 11.25494667 | 0.059602    | 188.8350503 |
| 1 | P09 | 31955 | CG40287  | 11.71437    | 0.053716    | 218.0797155 |
| 1 | P10 | 29298 | CG30085  | 9.946169333 | 0.045463    | 218.7750332 |
| 1 | P11 | 31963 | CG32738  | 8.863371333 | 0.055579667 | 159.4714734 |
| 1 | P12 | 29299 | CG30098  | 11.2749     | 0.050360667 | 223.8830569 |
| 1 | P13 | 31971 | CG33062  | 7.829584    | 0.044054667 | 177.724282  |
| 1 | P14 | 29300 | CG30114  | 8.631534    | 0.042468667 | 203.2447608 |
| 1 | P15 | 32003 | CG40234  | 11.306363   | 0.039116667 | 289.0420878 |
| 1 | P16 | 29292 | CG30175  | 10.586179   | 0.044779667 | 236.4059357 |
| 1 | P17 | 31986 | CG32564  | 8.888557667 | 0.048300667 | 184.025569  |

|   |     |       |          |             |             |             |
|---|-----|-------|----------|-------------|-------------|-------------|
| 1 | P18 | 29296 | CG30056  | 9.955050333 | 0.043594    | 228.358268  |
| 1 | P19 | 32011 | CG32726  | 12.79156    | 0.046836667 | 273.1099566 |
| 1 | P20 | 29289 | CG2976   | 11.69104667 | 0.039581333 | 295.3676817 |
| 1 | P21 |       | wts      | 52.21936    | 0.035222667 | 1482.549873 |
| 1 | P22 |       | HFA17794 | 1.179109333 | 0.011506    | 102.4777797 |
| 1 | P23 |       | hpo      | 36.32528667 | 0.042376    | 857.2136744 |
| 1 | P24 |       | Luc      | 1.589801    | 0.041328333 | 38.46758076 |
| 2 | A01 |       | DIAP1    | 0.520394667 | 0.006610667 | 78.7204518  |
| 2 | A02 |       | ex/ft    | 51.08201    | 0.039664    | 1287.868344 |
| 2 | A03 |       | Luc      | 1.711456667 | 0.051946    | 32.94684223 |
| 2 | A04 |       | hpo      | 40.42368667 | 0.033692    | 1199.800744 |
| 2 | A05 | 28741 | CG15149  | 12.36681    | 0.051611    | 239.6157796 |
| 2 | A06 | 28929 | CG17572  | 11.20305667 | 0.039388333 | 284.4257606 |
| 2 | A07 | 28745 | CG15429  | 13.14492333 | 0.050245    | 261.6165456 |
| 2 | A08 | 28938 | CG17540  | 9.39426     | 0.045906667 | 204.6382515 |
| 2 | A09 | 28747 | CG15563  | 12.74447333 | 0.042870333 | 297.2795484 |
| 2 | A10 | 28934 | CG17377  | 13.08183667 | 0.038655333 | 338.4225549 |
| 2 | A11 | 28737 | CG33152  | 9.138473    | 0.044743667 | 204.2405927 |
| 2 | A12 | 28931 | CG17658  | 12.521402   | 0.038157667 | 328.1490482 |
| 2 | A13 | 28744 | CG15287  | 10.80584533 | 0.044162667 | 244.682809  |
| 2 | A14 | 28980 | CG17489  | 1.173367333 | 0.029110667 | 40.30712683 |
| 2 | A15 | 28743 | CG15241  | 10.78421333 | 0.037999333 | 283.8000667 |
| 2 | A16 | 32116 | CG11771  | 9.371778    | 0.035817667 | 261.6523876 |
| 2 | A17 | 28746 | CG15481  | 5.954307    | 0.041869667 | 142.2105184 |
| 2 | A18 | 32124 | CG11821  | 11.71311    | 0.036031    | 325.084233  |
| 2 | A19 | 28774 | CG15845  | 8.785126333 | 0.044039333 | 199.4836358 |
| 2 | A20 | 32132 | CG11983  | 12.36063333 | 0.035277333 | 350.3845718 |
| 2 | A21 | 28933 | CG17334  | 12.69593    | 0.037198333 | 341.3037322 |
| 2 | A22 | 32156 | CG13421  | 13.98549    | 0.034599333 | 404.2127016 |
| 2 | A23 | 28928 | CG17250  | 13.94506333 | 0.036942333 | 377.4819313 |
| 2 | A24 | 32140 | CG12027  | 17.40223667 | 0.036545667 | 476.1778414 |
| 2 | B01 |       | DIAP1    | 0.492309    | 0.010110667 | 48.69204141 |
| 2 | B02 |       | ex/ft    | 43.31631333 | 0.048065    | 901.2028156 |
| 2 | B03 |       | Luc      | 1.912246    | 0.051242333 | 37.31769956 |
| 2 | B04 |       | hpo      | 39.58307333 | 0.045825667 | 863.7751769 |
| 2 | B05 | 32164 | CG13494  | 10.58467367 | 0.046333667 | 228.4445508 |
| 2 | B06 | 29026 | CG18024  | 8.051021    | 0.048509667 | 165.9673536 |
| 2 | B07 | 32180 | CG13545  | 9.664973    | 0.047686    | 202.6794657 |
| 2 | B08 | 29027 | CG18107  | 12.27833333 | 0.047579    | 258.0620302 |
| 2 | B09 | 32188 | CG13563  | 12.910327   | 0.044172667 | 292.269586  |
| 2 | B10 | 29028 | CG18171  | 14.56762    | 0.044666333 | 326.1431802 |
| 2 | B11 | 32204 | CG13606  | 11.451122   | 0.039280333 | 291.5230353 |
| 2 | B12 | 29099 | CG18335  | 14.37919    | 0.040715333 | 353.1640005 |
| 2 | B13 | 32159 | CG13436  | 11.95198667 | 0.046156    | 258.9476269 |
| 2 | B14 | 32404 | CG30266  | 13.60252333 | 0.041240333 | 329.8354362 |
| 2 | B15 | 29017 | CG40072  | 10.65766533 | 0.03993     | 266.9087236 |
| 2 | B16 | 32412 | CG30419  | 12.79060667 | 0.045751667 | 279.5659175 |
| 2 | B17 | 29021 | CG17742  | 12.68438    | 0.041342333 | 306.8133552 |
| 2 | B18 | 32420 | CG31258  | 10.81591433 | 0.061193    | 176.750843  |
| 2 | B19 | 29022 | CG17806  | 8.282655667 | 0.038138667 | 217.172135  |
| 2 | B20 | 32436 | CG31675  | 12.60775667 | 0.036244333 | 347.8545612 |
| 2 | B21 | 29025 | CG17945  | 13.26358333 | 0.034732333 | 381.8799965 |
| 2 | B22 | 32452 | CG32718  | 13.01877333 | 0.031973    | 407.180225  |
| 2 | B23 | 29024 | CG17917  | 10.970354   | 0.040312667 | 272.1316873 |



|   |     |       |         |             |             |             |
|---|-----|-------|---------|-------------|-------------|-------------|
| 2 | B24 | 32444 | CG32574 | 13.44054667 | 0.037529    | 358.137618  |
| 2 | C01 | 28754 | CG15226 | 9.692224667 | 0.050151    | 193.2608456 |
| 2 | C02 | 28949 | CG40223 | 7.98929     | 0.062269    | 128.3028473 |
| 2 | C03 | 28739 | CG15876 | 9.976369333 | 0.060855333 | 163.9358259 |
| 2 | C04 | 28947 | CG17419 | 13.28008    | 0.057168    | 232.2991884 |
| 2 | C05 | 28753 | CG15151 | 10.59591267 | 0.063660333 | 166.444505  |
| 2 | C06 | 28940 | CG17574 | 9.885070667 | 0.047056333 | 210.0688678 |
| 2 | C07 | 28757 | CG15432 | 11.7714     | 0.070454667 | 167.077648  |
| 2 | C08 | 28975 | CG17631 | 10.20863633 | 0.052704    | 193.6975625 |
| 2 | C09 | 28759 | CG15593 | 9.602987    | 0.045879333 | 209.3096456 |
| 2 | C10 | 28945 | CG17381 | 10.50718333 | 0.047898    | 219.3658051 |
| 2 | C11 | 28812 | CG15142 | 8.894887    | 0.047212333 | 188.4017665 |
| 2 | C12 | 28942 | CG17660 | 7.678982    | 0.047428667 | 161.9059219 |
| 2 | C13 | 28756 | CG15362 | 8.065847667 | 0.047652333 | 169.2644851 |
| 2 | C14 | 28996 | CG17650 | 9.502318667 | 0.049808667 | 190.7764111 |
| 2 | C15 | 28755 | CG15242 | 9.298566667 | 0.046225667 | 201.1559235 |
| 2 | C16 | 32117 | CG11775 | 9.503229    | 0.047944333 | 198.2138105 |
| 2 | C17 | 28758 | CG15505 | 8.601678667 | 0.050746    | 169.5045652 |
| 2 | C18 | 32125 | CG11839 | 12.62626    | 0.048997333 | 257.6927996 |
| 2 | C19 | 28786 | CG15848 | 10.49335833 | 0.045862667 | 228.7995683 |
| 2 | C20 | 32133 | CG11993 | 8.445068667 | 0.040567667 | 208.1724033 |
| 2 | C21 | 28944 | CG17337 | 10.45809667 | 0.044456667 | 235.2424833 |
| 2 | C22 | 32157 | CG13424 | 9.352479667 | 0.041052333 | 227.8184675 |
| 2 | C23 | 28939 | CG17257 | 9.325283667 | 0.036233667 | 257.3651668 |
| 2 | C24 | 32141 | CG12045 | 10.86286567 | 0.038991    | 278.5993092 |
| 2 | D01 | 32172 | CG13524 | 10.95272333 | 0.071740333 | 152.6717653 |
| 2 | D02 | 29020 | CG33103 | 17.12543667 | 0.056726    | 301.8974838 |
| 2 | D03 | 32196 | CG13585 | 9.312871    | 0.061971667 | 150.2762714 |
| 2 | D04 | 29019 | CG18336 | 8.795628667 | 0.044487667 | 197.7093726 |
| 2 | D05 | 32165 | CG13495 | 9.041331    | 0.051185    | 176.6402462 |
| 2 | D06 | 29037 | CG18026 | 9.626741333 | 0.048366667 | 199.0366919 |
| 2 | D07 | 32181 | CG13548 | 7.952400333 | 0.049414667 | 160.9319838 |
| 2 | D08 | 29038 | CG18108 | 8.913602667 | 0.057293333 | 155.578357  |
| 2 | D09 | 32189 | CG13566 | 9.755231333 | 0.062989    | 154.8719829 |
| 2 | D10 | 29039 | CG18180 | 9.540367    | 0.047112333 | 202.5025365 |
| 2 | D11 | 32205 | CG13609 | 9.922115667 | 0.046285667 | 214.366917  |
| 2 | D12 | 29100 | CG18432 | 11.55229    | 0.04566     | 253.0067893 |
| 2 | D13 | 32160 | CG13455 | 11.78251    | 0.051717    | 227.8266334 |
| 2 | D14 | 32405 | CG30269 | 9.998738667 | 0.049306    | 202.7894915 |
| 2 | D15 | 29029 | CG17691 | 9.731147333 | 0.038620667 | 251.9673577 |
| 2 | D16 | 32413 | CG3069  | 13.07028667 | 0.043593667 | 299.8207691 |
| 2 | D17 | 29033 | CG17746 | 10.72074133 | 0.049848667 | 215.065759  |
| 2 | D18 | 32421 | CG31288 | 9.580062667 | 0.043436667 | 220.5524365 |
| 2 | D19 | 29034 | CG17814 | 10.03686733 | 0.036745667 | 273.1442438 |
| 2 | D20 | 32437 | CG31676 | 9.569363    | 0.044777667 | 213.7083889 |
| 2 | D21 | 29036 | CG17946 | 5.273636667 | 0.029044    | 181.5740486 |
| 2 | D22 | 32453 | CG32755 | 10.815891   | 0.050716    | 213.2638812 |
| 2 | D23 | 29080 | CG17903 | 7.067209    | 0.033080667 | 213.6356281 |
| 2 | D24 | 32445 | CG32639 | 10.14526733 | 0.035865    | 282.8737581 |
| 2 | E01 | 28766 | CG15231 | 6.937225667 | 0.059626    | 116.345649  |
| 2 | E02 | 28960 | CG17514 | 7.023266    | 0.047614667 | 147.5021562 |
| 2 | E03 | 28751 | CG15877 | 9.844309667 | 0.064469333 | 152.6975565 |
| 2 | E04 | 28959 | CG40199 | 0.571275333 | 0.034126    | 16.74017855 |
| 2 | E05 | 28765 | CG15159 | 6.376640333 | 0.045872333 | 139.0084147 |

|   |     |       |         |             |             |             |
|---|-----|-------|---------|-------------|-------------|-------------|
| 2 | E06 | 28952 | CG17577 | 6.795180667 | 0.053342333 | 127.3881408 |
| 2 | E07 | 28769 | CG15434 | 6.626500333 | 0.043478    | 152.4104221 |
| 2 | E08 | 28961 | CG17559 | 8.225498667 | 0.050667333 | 162.3432323 |
| 2 | E09 | 28771 | CG15595 | 6.939315    | 0.050244    | 138.1123119 |
| 2 | E10 | 28957 | CG17387 | 6.825853667 | 0.046596667 | 146.4880249 |
| 2 | E11 | 28761 | CG15660 | 7.80656     | 0.05653     | 138.0958783 |
| 2 | E12 | 28954 | CG17662 | 7.039713    | 0.044984333 | 156.4925493 |
| 2 | E13 | 28810 | CG15859 | 5.496626    | 0.044678333 | 123.0266572 |
| 2 | E14 | 29002 | CG40016 | 6.183264667 | 0.047154333 | 131.1282385 |
| 2 | E15 | 28767 | CG15257 | 8.021663667 | 0.04521     | 177.4311804 |
| 2 | E16 | 32118 | CG11786 | 8.567168    | 0.045038    | 190.2208801 |
| 2 | E17 | 28770 | CG15522 | 6.467185333 | 0.041424    | 156.1217008 |
| 2 | E18 | 32126 | CG11852 | 8.159888    | 0.043881333 | 185.953511  |
| 2 | E19 | 28932 | CG17290 | 8.252266    | 0.039911    | 206.7667059 |
| 2 | E20 | 32134 | CG12001 | 9.761196    | 0.046445    | 210.1667779 |
| 2 | E21 | 28956 | CG17343 | 9.569290333 | 0.046388333 | 206.2865735 |
| 2 | E22 | 32158 | CG13426 | 8.236093    | 0.041722    | 197.4040794 |
| 2 | E23 | 28951 | CG17259 | 5.888146333 | 0.042656667 | 138.0357818 |
| 2 | E24 | 32142 | CG12047 | 9.377552667 | 0.037555    | 249.7018417 |
| 2 | F01 | 32173 | CG13532 | 6.556641    | 0.066758333 | 98.21456997 |
| 2 | F02 | 29032 | CG18473 | 8.638893    | 0.067724333 | 127.559661  |
| 2 | F03 | 32197 | CG13587 | 8.058975667 | 0.059705667 | 134.9784052 |
| 2 | F04 | 29041 | CG18271 | 10.89424133 | 0.060203667 | 180.9564423 |
| 2 | F05 | 32166 | CG13500 | 6.508343333 | 0.058788    | 110.7087047 |
| 2 | F06 | 29048 | CG18039 | 7.786921    | 0.062849333 | 123.8982275 |
| 2 | F07 | 32182 | CG13549 | 6.651425667 | 0.053884    | 123.4397162 |
| 2 | F08 | 29049 | CG18109 | 8.406878333 | 0.050890667 | 165.1948949 |
| 2 | F09 | 32190 | CG13568 | 8.837772667 | 0.053651    | 164.7270818 |
| 2 | F10 | 29050 | CG18186 | 6.249011667 | 0.048353    | 129.2373103 |
| 2 | F11 | 32206 | CG13611 | 6.288929333 | 0.045752    | 137.4569272 |
| 2 | F12 | 29101 | CG18537 | 7.986219667 | 0.054153333 | 147.4742029 |
| 2 | F13 | 32161 | CG13470 | 9.100324333 | 0.049002667 | 185.7107981 |
| 2 | F14 | 32406 | CG30273 | 6.839494    | 0.046757667 | 146.2753488 |
| 2 | F15 | 29040 | CG40220 | 7.66309     | 0.042756    | 179.2284124 |
| 2 | F16 | 32414 | CG31009 | 6.966764    | 0.039459333 | 176.5555424 |
| 2 | F17 | 29044 | CG17751 | 8.415091    | 0.043378333 | 193.9929535 |
| 2 | F18 | 32422 | CG31298 | 7.515351    | 0.039375333 | 190.8644414 |
| 2 | F19 | 29045 | CG17820 | 7.767548333 | 0.044725667 | 173.6709347 |
| 2 | F20 | 32438 | CG31740 | 7.548177333 | 0.043381667 | 173.9946368 |
| 2 | F21 | 29105 | CG17943 | 7.097475333 | 0.040019333 | 177.3511636 |
| 2 | F22 | 32454 | CG32762 | 6.914931    | 0.041929333 | 164.9186965 |
| 2 | F23 | 29092 | CG17911 | 10.637395   | 0.045362    | 234.5001323 |
| 2 | F24 | 32446 | CG32669 | 9.021633333 | 0.040882667 | 220.6713522 |
| 2 | G01 | 28778 | CG15233 | 13.05621    | 0.054518667 | 239.481462  |
| 2 | G02 | 28971 | CG40304 | 16.09282667 | 0.058547333 | 274.8686533 |
| 2 | G03 | 28763 | CG15884 | 11.85622    | 0.040740667 | 291.0168382 |
| 2 | G04 | 28964 | CG40443 | 10.27697733 | 0.043974    | 233.7057655 |
| 2 | G05 | 28777 | CG15172 | 9.791361    | 0.042053333 | 232.8319832 |
| 2 | G06 | 28963 | CG17580 | 12.41881667 | 0.046798667 | 265.3668908 |
| 2 | G07 | 28781 | CG15437 | 28.87081    | 0.049364333 | 584.8516135 |
| 2 | G08 | 28972 | CG17560 | 9.608361667 | 0.046189333 | 208.0212242 |
| 2 | G09 | 28783 | CG15597 | 11.42032567 | 0.048328333 | 236.3070456 |
| 2 | G10 | 28968 | CG17389 | 10.06110233 | 0.050417    | 199.5577352 |
| 2 | G11 | 28773 | CG15673 | 12.13793567 | 0.05048     | 240.4503896 |

|   |     |       |         |             |             |             |
|---|-----|-------|---------|-------------|-------------|-------------|
| 2 | G12 | 28965 | CG17665 | 13.30832333 | 0.056424667 | 235.8600258 |
| 2 | G13 | 28780 | CG15386 | 12.65037333 | 0.043746667 | 289.1734227 |
| 2 | G14 | 32148 | CG12819 | 10.60096333 | 0.049038667 | 216.1756029 |
| 2 | G15 | 28779 | CG15260 | 11.84438333 | 0.042318    | 279.8899601 |
| 2 | G16 | 32119 | CG11788 | 12.91511333 | 0.037940333 | 340.4059005 |
| 2 | G17 | 28823 | CG15917 | 13.54073667 | 0.041334667 | 327.5879004 |
| 2 | G18 | 32127 | CG11872 | 14.0745     | 0.037851333 | 371.836307  |
| 2 | G19 | 28943 | CG17293 | 8.551956667 | 0.049894333 | 171.4013615 |
| 2 | G20 | 32135 | CG12009 | 11.41996667 | 0.03602     | 317.0451601 |
| 2 | G21 | 28967 | CG17358 | 4.451583333 | 0.031121    | 143.0411405 |
| 2 | G22 | 32153 | CG13380 | 12.01668333 | 0.034074    | 352.6642993 |
| 2 | G23 | 28962 | CG17261 | 10.76519067 | 0.039693    | 271.2113135 |
| 2 | G24 | 32143 | CG12740 | 2.002573333 | 0.028454    | 70.3793257  |
| 2 | H01 | 32174 | CG13533 | 11.37081333 | 0.059096    | 192.4125716 |
| 2 | H02 | 29043 | CG18496 | 10.82365433 | 0.062587667 | 172.9358979 |
| 2 | H03 | 32198 | CG13592 | 10.88312533 | 0.043182333 | 252.0272642 |
| 2 | H04 | 29052 | CG18284 | 10.19570933 | 0.049518    | 205.8990535 |
| 2 | H05 | 32167 | CG13501 | 10.82853767 | 0.059794333 | 181.0963859 |
| 2 | H06 | 29059 | CG18066 | 11.75995333 | 0.049307    | 238.5047424 |
| 2 | H07 | 32183 | CG13552 | 10.19392767 | 0.041681333 | 244.568176  |
| 2 | H08 | 29060 | CG18110 | 10.373846   | 0.046001333 | 225.5118547 |
| 2 | H09 | 32191 | CG13577 | 14.8106     | 0.04401     | 336.5280618 |
| 2 | H10 | 29061 | CG18188 | 9.982123667 | 0.051052    | 195.5285526 |
| 2 | H11 | 32207 | CG13614 | 11.26782333 | 0.043999333 | 256.0907741 |
| 2 | H12 | 32428 | CG3152  | 10.98407567 | 0.048610667 | 225.9601939 |
| 2 | H13 | 32162 | CG13472 | 10.44827667 | 0.040846    | 255.796814  |
| 2 | H14 | 32407 | CG30279 | 11.35413467 | 0.043382667 | 261.7205335 |
| 2 | H15 | 29051 | CG40281 | 10.13278167 | 0.038382    | 263.9982718 |
| 2 | H16 | 32415 | CG31097 | 12.90649    | 0.039603    | 325.8967755 |
| 2 | H17 | 29055 | CG33098 | 12.05822    | 0.039244    | 307.2627663 |
| 2 | H18 | 32423 | CG31300 | 11.09473667 | 0.032834333 | 337.90047   |
| 2 | H19 | 29056 | CG17824 | 11.56814    | 0.038454333 | 300.8279951 |
| 2 | H20 | 32439 | CG31752 | 11.20967    | 0.034849    | 321.6640363 |
| 2 | H21 | 29058 | CG17956 | 15.09428667 | 0.035536333 | 424.7564465 |
| 2 | H22 | 32455 | CG32773 | 11.67729    | 0.038196667 | 305.7148966 |
| 2 | H23 | 29057 | CG17929 | 13.91129667 | 0.041871    | 332.2418062 |
| 2 | H24 | 32447 | CG32672 | 7.441109333 | 0.044095333 | 168.7504951 |
| 2 | I01 | 28790 | CG15234 | 3.368722    | 0.046898    | 71.83082434 |
| 2 | I02 | 28981 | CG17525 | 10.75393167 | 0.046157333 | 232.9842495 |
| 2 | I03 | 28775 | CG15888 | 12.24389333 | 0.060191333 | 203.4162172 |
| 2 | I04 | 28979 | CG40065 | 9.629484    | 0.053352    | 180.4896536 |
| 2 | I05 | 28789 | CG15177 | 10.10938267 | 0.053365333 | 189.4372626 |
| 2 | I06 | 28974 | CG17597 | 11.75329667 | 0.050085667 | 234.6638759 |
| 2 | I07 | 28793 | CG1544  | 13.41883    | 0.049327333 | 272.0363963 |
| 2 | I08 | 28982 | CG17565 | 12.38802    | 0.054627667 | 226.7719043 |
| 2 | I09 | 28795 | CG15610 | 20.67908333 | 0.078061667 | 264.907018  |
| 2 | I10 | 28978 | CG17368 | 9.095937667 | 0.04925     | 184.6890897 |
| 2 | I11 | 28785 | CG15684 | 9.629372    | 0.055886667 | 172.3017774 |
| 2 | I12 | 28930 | CG17618 | 9.193077667 | 0.042757    | 215.0075465 |
| 2 | I13 | 28792 | CG15389 | 10.596159   | 0.049425    | 214.3886495 |
| 2 | I14 | 32149 | CG12820 | 10.52109167 | 0.043748667 | 240.4894244 |
| 2 | I15 | 28824 | CG15145 | 11.10747    | 0.045077333 | 246.4092079 |
| 2 | I16 | 32120 | CG11790 | 9.415522    | 0.044209    | 212.9774933 |
| 2 | I17 | 28794 | CG15534 | 9.569999667 | 0.041488333 | 230.6672478 |

|   |     |       |         |             |             |             |
|---|-----|-------|---------|-------------|-------------|-------------|
| 2 | I18 | 32128 | CG11881 | 9.569913    | 0.048769    | 196.2294285 |
| 2 | I19 | 28955 | CG17295 | 10.41252667 | 0.040555333 | 256.7486397 |
| 2 | I20 | 32136 | CG12020 | 12.76328    | 0.040208333 | 317.4287254 |
| 2 | I21 | 28998 | CG17327 | 13.13331333 | 0.041111    | 319.4598364 |
| 2 | I22 | 32154 | CG13394 | 9.058535333 | 0.038808333 | 233.4172729 |
| 2 | I23 | 28973 | CG17264 | 10.05391967 | 0.038862333 | 258.7060221 |
| 2 | I24 | 32144 | CG12744 | 14.77310333 | 0.039470333 | 374.2837236 |
| 2 | J01 | 32175 | CG13534 | 13.61091333 | 0.047158    | 288.623634  |
| 2 | J02 | 29054 | CG18510 | 10.402288   | 0.050902333 | 204.3577832 |
| 2 | J03 | 32199 | CG13595 | 10.23178633 | 0.054426    | 187.9944573 |
| 2 | J04 | 29063 | CG18304 | 6.228621667 | 0.048961667 | 127.2142492 |
| 2 | J05 | 32168 | CG13504 | 8.604768667 | 0.048616    | 176.9945834 |
| 2 | J06 | 29071 | CG18069 | 9.733964333 | 0.051267667 | 189.8655618 |
| 2 | J07 | 32184 | CG13556 | 12.98396333 | 0.058605    | 221.5504365 |
| 2 | J08 | 29072 | CG18111 | 2.084728333 | 0.048514333 | 42.9713899  |
| 2 | J09 | 32192 | CG13578 | 8.643096667 | 0.052075667 | 165.9718871 |
| 2 | J10 | 29073 | CG1821  | 0.851627667 | 0.050451    | 16.88029309 |
| 2 | J11 | 32208 | CG13615 | 8.665681333 | 0.047117667 | 183.915757  |
| 2 | J12 | 32429 | CG31551 | 8.279028333 | 0.036775    | 225.1265352 |
| 2 | J13 | 32163 | CG13481 | 12.33114    | 0.050755667 | 242.9510005 |
| 2 | J14 | 32408 | CG30330 | 9.545375    | 0.037131333 | 257.0706232 |
| 2 | J15 | 29062 | CG17707 | 12.490183   | 0.044051333 | 283.5370023 |
| 2 | J16 | 32416 | CG31102 | 11.71587833 | 0.039611    | 295.7733542 |
| 2 | J17 | 29066 | CG17785 | 15.15786    | 0.046420333 | 326.5349236 |
| 2 | J18 | 32424 | CG31369 | 11.80103667 | 0.042165    | 279.8775446 |
| 2 | J19 | 29067 | CG1783  | 9.944860667 | 0.040432667 | 245.9610381 |
| 2 | J20 | 32440 | CG3193  | 1.918877333 | 0.025677    | 74.73136789 |
| 2 | J21 | 29070 | CG17958 | 12.96733667 | 0.038259333 | 338.9326352 |
| 2 | J22 | 32433 | CG31636 | 11.36427467 | 0.037987    | 299.1622046 |
| 2 | J23 | 29069 | CG1793  | 13.34223767 | 0.027239667 | 489.8091386 |
| 2 | J24 | 32448 | CG32690 | 12.88960333 | 0.03671     | 351.1196767 |
| 2 | K02 | 28992 | CG17527 | 14.65830333 | 0.054551667 | 268.7049586 |
| 2 | K03 | 28798 | CG15855 | 12.20988233 | 0.048101    | 253.8384302 |
| 2 | K04 | 28990 | CG40222 | 12.43160967 | 0.054746333 | 227.0765713 |
| 2 | K05 | 28801 | CG15180 | 12.043706   | 0.065689667 | 183.342474  |
| 2 | K06 | 28984 | CG17604 | 12.64498667 | 0.057779667 | 218.8483838 |
| 2 | K07 | 28805 | CG15443 | 13.31707667 | 0.057849667 | 230.2014417 |
| 2 | K08 | 28993 | CG17567 | 11.40058533 | 0.046496333 | 245.1932124 |
| 2 | K09 | 28807 | CG15626 | 10.79188533 | 0.047127333 | 228.994186  |
| 2 | K1  | 28802 | CG15235 | 13.70736667 | 0.062339    | 219.8842886 |
| 2 | K10 | 28988 | CG17370 | 12.30462333 | 0.046170667 | 266.5030467 |
| 2 | K11 | 28797 | CG15690 | 10.00568333 | 0.048212    | 207.5351227 |
| 2 | K12 | 28986 | CG17673 | 13.98845333 | 0.045936333 | 304.5182826 |
| 2 | K13 | 28804 | CG15395 | 13.73353333 | 0.049399333 | 278.0104995 |
| 2 | K14 | 32150 | CG12837 | 12.46908667 | 0.039927333 | 312.2945017 |
| 2 | K15 | 28803 | CG15279 | 12.92026    | 0.043790667 | 295.0459763 |
| 2 | K16 | 32121 | CG11791 | 13.72481667 | 0.041599667 | 329.9261212 |
| 2 | K17 | 28806 | CG15536 | 10.64572333 | 0.040652333 | 261.8723812 |
| 2 | K18 | 32129 | CG11905 | 14.01077333 | 0.043765333 | 320.1340483 |
| 2 | K19 | 28966 | CG17304 | 11.30500067 | 0.035513667 | 318.3281741 |
| 2 | K20 | 32137 | CG12023 | 10.202895   | 0.037639    | 271.0724249 |
| 2 | K21 | 29009 | CG17330 | 13.45445    | 0.035640667 | 377.502759  |
| 2 | K22 | 32155 | CG13396 | 13.38481667 | 0.035158333 | 380.701114  |
| 2 | K23 | 28983 | CG17266 | 16.48596    | 0.040567667 | 406.3817654 |

|   |     |       |         |             |             |             |
|---|-----|-------|---------|-------------|-------------|-------------|
| 2 | K24 | 32145 | CG12756 | 14.07724667 | 0.038149333 | 369.0037397 |
| 2 | L01 | 32176 | CG13538 | 12.12976533 | 0.062542667 | 193.9438463 |
| 2 | L02 | 29065 | CG18518 | 11.14355    | 0.054301333 | 205.2168762 |
| 2 | L03 | 32203 | CG13605 | 14.45044    | 0.060821667 | 237.5870441 |
| 2 | L04 | 29075 | CG18314 | 14.74373    | 0.052338    | 281.7022049 |
| 2 | L05 | 32169 | CG13517 | 11.39688033 | 0.053716    | 212.1691923 |
| 2 | L06 | 29083 | CG18081 | 13.12383667 | 0.054056333 | 242.7807411 |
| 2 | L07 | 32185 | CG13557 | 12.22716    | 0.046667333 | 262.0068285 |
| 2 | L08 | 29084 | CG18124 | 9.715835    | 0.047822667 | 203.1638066 |
| 2 | L09 | 32193 | CG13579 | 13.43282    | 0.051428667 | 261.1932385 |
| 2 | L10 | 29085 | CG18213 | 9.975875    | 0.040184    | 248.2549024 |
| 2 | L11 | 32209 | CG13616 | 12.76743333 | 0.046947333 | 271.9522586 |
| 2 | L12 | 32451 | CG32714 | 12.04544667 | 0.044703    | 269.4549956 |
| 2 | L13 | 29023 | CG17856 | 11.43386667 | 0.047896667 | 238.7194655 |
| 2 | L14 | 32409 | CG30396 | 11.34454333 | 0.037793    | 300.1757821 |
| 2 | L15 | 29074 | CG1772  | 13.19851667 | 0.039922    | 330.6076015 |
| 2 | L16 | 32417 | CG31104 | 13.68003    | 0.042012333 | 325.6193816 |
| 2 | L17 | 29078 | CG40398 | 13.53139333 | 0.040165333 | 336.892345  |
| 2 | L18 | 32425 | CG31370 | 13.01829    | 0.041246    | 315.6255152 |
| 2 | L19 | 29079 | CG17840 | 13.84442    | 0.046233    | 299.4488785 |
| 2 | L20 | 32441 | CG31998 | 11.54798333 | 0.041120333 | 280.833894  |
| 2 | L21 | 29082 | CG17962 | 15.29618    | 0.045540333 | 335.8820386 |
| 2 | L22 | 32434 | CG31662 | 13.17271667 | 0.044801    | 294.0272911 |
| 2 | L23 | 29081 | CG17934 | 12.21262667 | 0.035642333 | 342.6438598 |
| 2 | L24 | 32449 | CG32693 | 13.56042933 | 0.032119333 | 422.1890035 |
| 2 | M01 | 28814 | CG15236 | 15.03569667 | 0.047685    | 315.3129216 |
| 2 | M02 | 29003 | CG17531 | 14.39875333 | 0.058873    | 244.5731207 |
| 2 | M03 | 28799 | CG15908 | 11.72869333 | 0.043443667 | 269.9747566 |
| 2 | M04 | 29001 | CG1744  | 9.944089    | 0.052437    | 189.6387856 |
| 2 | M05 | 28813 | CG1519  | 1.778447667 | 0.030599333 | 58.12047103 |
| 2 | M06 | 28995 | CG17610 | 11.97193667 | 0.055516333 | 215.6471069 |
| 2 | M07 | 28817 | CG1546  | 11.71679333 | 0.050842333 | 230.4534935 |
| 2 | M08 | 29004 | CG17570 | 10.404087   | 0.051540667 | 201.8617079 |
| 2 | M09 | 28819 | CG15634 | 15.15895333 | 0.051869667 | 292.2508338 |
| 2 | M10 | 28999 | CG17374 | 10.46303833 | 0.042294    | 247.3882426 |
| 2 | M11 | 28809 | CG15711 | 10.903854   | 0.038862333 | 280.5764107 |
| 2 | M12 | 28953 | CG17626 | 17.51122333 | 0.045963    | 380.9852127 |
| 2 | M13 | 28816 | CG15412 | 11.98995333 | 0.050920667 | 235.4634006 |
| 2 | M14 | 32151 | CG13353 | 13.95924667 | 0.039036333 | 357.5962565 |
| 2 | M15 | 28815 | CG15282 | 9.300965667 | 0.031447333 | 295.763255  |
| 2 | M16 | 32122 | CG11797 | 10.328074   | 0.032981667 | 313.1459093 |
| 2 | M17 | 28818 | CG15544 | 14.78963    | 0.041990667 | 352.212317  |
| 2 | M18 | 32130 | CG11908 | 10.89401667 | 0.044401333 | 245.3533678 |
| 2 | M19 | 28977 | CG17321 | 11.74609333 | 0.038844667 | 302.3862564 |
| 2 | M20 | 32138 | CG12024 | 11.64991967 | 0.03635     | 320.4929757 |
| 2 | M21 | 29005 | CG17280 | 11.735112   | 0.033225    | 353.2012641 |
| 2 | M22 | 32147 | CG12813 | 10.95276    | 0.032768333 | 334.2483088 |
| 2 | M23 | 28994 | CG17279 | 13.90496667 | 0.039351333 | 353.3543971 |
| 2 | M24 | 32146 | CG12767 | 10.81801167 | 0.035537333 | 304.4125896 |
| 2 | N01 | 32177 | CG13539 | 14.69320333 | 0.071859333 | 204.4717457 |
| 2 | N02 | 29106 | CG18004 | 13.09694333 | 0.070347667 | 186.1745237 |
| 2 | N03 | 32201 | CG13601 | 8.013201    | 0.051555    | 155.4301426 |
| 2 | N04 | 29087 | CG18321 | 9.771903333 | 0.047668    | 204.9992308 |
| 2 | N05 | 32170 | CG13518 | 11.11439833 | 0.056172    | 197.8636747 |

|   |     |       |          |             |             |             |
|---|-----|-------|----------|-------------|-------------|-------------|
| 2 | N06 | 29095 | CG18090  | 12.12515333 | 0.050296667 | 241.072702  |
| 2 | N07 | 32186 | CG13558  | 12.67747333 | 0.048392667 | 261.9709598 |
| 2 | N08 | 29096 | CG18131  | 7.404108667 | 0.043420667 | 170.520382  |
| 2 | N09 | 32194 | CG13580  | 10.263403   | 0.052401    | 195.8627316 |
| 2 | N10 | 29097 | CG18223  | 9.412786333 | 0.045801333 | 205.5133693 |
| 2 | N11 | 32210 | CG13617  | 12.308304   | 0.041512    | 296.4999036 |
| 2 | N12 | 32431 | CG31633  | 10.17526033 | 0.042454    | 239.6773056 |
| 2 | N13 | 29104 | CG17916  | 13.48599667 | 0.045101    | 299.0176862 |
| 2 | N14 | 32410 | CG30401  | 11.72588333 | 0.043501    | 269.5543397 |
| 2 | N15 | 29086 | CG17725  | 10.44902467 | 0.040168    | 260.1330578 |
| 2 | N16 | 32418 | CG31105  | 13.80399    | 0.043112    | 320.1890425 |
| 2 | N17 | 29090 | CG32984  | 12.57862667 | 0.038275333 | 328.6353265 |
| 2 | N18 | 32426 | CG31436  | 11.54770467 | 0.040696    | 283.7552749 |
| 2 | N19 | 29091 | CG17853  | 9.936935667 | 0.037289667 | 266.4796056 |
| 2 | N20 | 32442 | CG32015  | 11.35076333 | 0.032668    | 347.458165  |
| 2 | N21 | 29094 | CG17994  | 12.57529667 | 0.034617333 | 363.2658976 |
| 2 | N22 | 32435 | CG31665  | 11.52635    | 0.035054333 | 328.8138414 |
| 2 | N23 | 29093 | CG17935  | 11.96918667 | 0.037807667 | 316.5809404 |
| 2 | N24 | 32450 | CG32702  | 12.17068    | 0.035815333 | 339.8175828 |
| 2 | O01 | 28826 | CG15237  | 9.401716    | 0.062318667 | 150.8651661 |
| 2 | O02 | 29015 | CG17533  | 8.872403667 | 0.047965333 | 184.9753364 |
| 2 | O03 | 28811 | CG15909  | 8.372755    | 0.047729    | 175.4228037 |
| 2 | O04 | 29013 | CG17443  | 11.744355   | 0.049507    | 237.2261498 |
| 2 | O05 | 28825 | CG1520   | 5.288083333 | 0.057100333 | 92.61037589 |
| 2 | O06 | 29014 | CG17494  | 3.907403    | 0.047474333 | 82.30558969 |
| 2 | O07 | 28829 | CG15479  | 13.93627333 | 0.059137667 | 235.6581536 |
| 2 | O08 | 29016 | CG17571  | 10.546242   | 0.055617667 | 189.6203604 |
| 2 | O09 | 28831 | CG15635  | 12.45757    | 0.049790333 | 250.2005744 |
| 2 | O10 | 29010 | CG17376  | 10.53347433 | 0.039942667 | 263.7148496 |
| 2 | O11 | 28821 | CG15715  | 11.02851933 | 0.047087333 | 234.2141411 |
| 2 | O12 | 29008 | CG17683  | 7.517472667 | 0.051718667 | 145.35318   |
| 2 | O13 | 28828 | CG15423  | 10.418732   | 0.048904333 | 213.043125  |
| 2 | O14 | 32152 | CG13360  | 10.66644433 | 0.058323    | 182.8857283 |
| 2 | O15 | 28822 | CG15870  | 10.649004   | 0.048214333 | 220.868013  |
| 2 | O16 | 32123 | CG11808  | 11.99601667 | 0.042735333 | 280.7048812 |
| 2 | O17 | 28830 | CG15548  | 12.78686    | 0.035349333 | 361.7284626 |
| 2 | O18 | 32131 | CG11915  | 12.496636   | 0.043331    | 288.3994369 |
| 2 | O19 | 28987 | CG17326  | 10.06322067 | 0.049279333 | 204.2077274 |
| 2 | O20 | 32139 | CG12026  | 9.805594667 | 0.032875    | 298.2690393 |
| 2 | O21 |       | wts      | 57.03174333 | 0.038431667 | 1483.977883 |
| 2 | O22 |       | HFA17794 | 1.274237    | 0.009261333 | 137.5867766 |
| 2 | O23 |       | hpo      | 37.10544667 | 0.035052    | 1058.582867 |
| 2 | O24 |       | Luc      | 1.467195    | 0.040825333 | 35.9383471  |
| 2 | P01 | 32178 | CG13540  | 11.21363667 | 0.075505333 | 148.5144979 |
| 2 | P02 | 29089 | CG18530  | 10.17172967 | 0.062675333 | 162.2923904 |
| 2 | P03 | 32202 | CG13603  | 9.682719667 | 0.063574333 | 152.3054849 |
| 2 | P04 | 29088 | CG18428  | 8.255354667 | 0.061107333 | 135.0959732 |
| 2 | P05 | 32171 | CG13519  | 8.532761333 | 0.052524    | 162.4545224 |
| 2 | P06 | 29107 | CG18106  | 9.975197    | 0.057086    | 174.7398136 |
| 2 | P07 | 32187 | CG13562  | 9.326857    | 0.056255333 | 165.7950713 |
| 2 | P08 | 29108 | CG18160  | 1.688484333 | 0.045031    | 37.49604347 |
| 2 | P09 | 32195 | CG13582  | 9.667945333 | 0.055033667 | 175.6732909 |
| 2 | P10 | 29109 | CG18233  | 11.16446333 | 0.045462333 | 245.576118  |
| 2 | P11 | 32211 | CG13618  | 8.258274667 | 0.048521667 | 170.1976711 |

|   |     |       |          |             |             |             |
|---|-----|-------|----------|-------------|-------------|-------------|
| 2 | P12 | 32432 | CG31634  | 9.506192    | 0.044335333 | 214.4157106 |
| 2 | P13 | 29046 | CG40438  | 12.18735333 | 0.040503667 | 300.895063  |
| 2 | P14 | 32411 | CG30408  | 11.09735667 | 0.050296667 | 220.6380144 |
| 2 | P15 | 29098 | CG17732  | 10.45746767 | 0.044983667 | 232.4725493 |
| 2 | P16 | 32419 | CG31203  | 9.555957667 | 0.046885667 | 203.8140512 |
| 2 | P17 | 29102 | CG17793  | 9.302247    | 0.040898667 | 227.4462167 |
| 2 | P18 | 32427 | CG31516  | 12.37232333 | 0.040886    | 302.6053743 |
| 2 | P19 | 29103 | CG17855  | 9.685851333 | 0.046165667 | 209.8063785 |
| 2 | P20 | 32443 | CG32543  | 10.46220933 | 0.035216667 | 297.0811926 |
| 2 | P21 |       | wtc      | 44.39803333 | 0.031154667 | 1425.084525 |
| 2 | P22 |       | HFA17794 | 0.915142    | 0.009749333 | 93.86713621 |
| 2 | P23 |       | hpo      | 34.15424667 | 0.029628333 | 1152.756258 |
| 2 | P24 |       | Luc      | 1.343439667 | 0.039348    | 34.14251466 |
| 3 | A01 |       | DIAP1    | 0.464308667 | 0.006333667 | 73.30803642 |
| 3 | A02 |       | ex/ft    | 42.70710667 | 0.03563     | 1198.627748 |
| 3 | A03 |       | Luc      | 1.735629667 | 0.049689667 | 34.9293884  |
| 3 | A04 |       | hpo      | 36.62804    | 0.040009    | 915.4950136 |
| 3 | A05 | 32468 | CG33061  | 10.18085833 | 0.049593    | 205.2882127 |
| 3 | A06 | 32372 | CG15498  | 12.55847333 | 0.052257    | 240.3213605 |
| 3 | A07 | 32476 | CG33178  | 10.67462833 | 0.045761667 | 233.2657246 |
| 3 | A08 | 32388 | CG15797  | 13.335828   | 0.048665    | 274.0332477 |
| 3 | A09 | 32492 | CG40131  | 12.55717867 | 0.048622667 | 258.2577125 |
| 3 | A10 | 29689 | CG3161   | 15.04083667 | 0.045114667 | 333.3912844 |
| 3 | A11 | 32458 | CG32804  | 12.36220333 | 0.048334    | 255.7661963 |
| 3 | A12 | 29690 | CG31627  | 13.48294667 | 0.040489667 | 332.9972256 |
| 3 | A13 | 32308 | CG14450  | 11.92519967 | 0.042713667 | 279.1893227 |
| 3 | A14 | 29691 | CG31649  | 12.87352333 | 0.049268    | 261.2958377 |
| 3 | A15 | 32348 | CG14701  | 13.72941667 | 0.044046333 | 311.7039633 |
| 3 | A16 | 29693 | CG31688  | 12.19751933 | 0.035369667 | 344.858193  |
| 3 | A17 | 32316 | CG14480  | 12.09876    | 0.038754    | 312.1938381 |
| 3 | A18 | 29685 | CG31563  | 14.4222     | 0.036107    | 399.4294735 |
| 3 | A19 | 32324 | CG14497  | 12.41589    | 0.045162333 | 274.9169293 |
| 3 | A20 | 29694 | CG31706  | 11.72787333 | 0.038809667 | 302.1894889 |
| 3 | A21 | 32332 | CG14605  | 12.73307667 | 0.039980667 | 318.4808491 |
| 3 | A22 | 29696 | CG31738  | 8.180863    | 0.036197667 | 226.0052582 |
| 3 | A23 | 32364 | CG14872  | 12.07417    | 0.037804667 | 319.3830568 |
| 3 | A24 | 29692 | CG31668  | 10.76033767 | 0.041168667 | 261.3720224 |
| 3 | B01 |       | DIAP1    | 0.554725667 | 0.009314667 | 59.55400086 |
| 3 | B02 |       | ex/ft    | 46.60633    | 0.049258333 | 946.1613263 |
| 3 | B03 |       | Luc      | 2.085060667 | 0.064865333 | 32.14445312 |
| 3 | B04 |       | hpo      | 35.02484667 | 0.041448    | 845.0310429 |
| 3 | B05 | 29687 | CG31775  | 10.474607   | 0.057061667 | 183.5664398 |
| 3 | B06 | 28836 | CG1663   | 13.01550467 | 0.057641667 | 225.8002834 |
| 3 | B07 | 29756 | CG31749  | 11.43947667 | 0.053126    | 215.3272723 |
| 3 | B08 | 28837 | CG16723  | 13.85091333 | 0.050786333 | 272.7291463 |
| 3 | B09 | 31732 | CG10359  | 10.84213633 | 0.05342     | 202.9602459 |
| 3 | B10 | 28841 | CG16978  | 14.09559    | 0.048795333 | 288.8716817 |
| 3 | B11 | 31740 | CG18557  | 12.84338333 | 0.048398667 | 265.3664702 |
| 3 | B12 | 28842 | CG17027  | 12.14452333 | 0.044137    | 275.1551608 |
| 3 | B13 | 31796 | CG33122  | 14.56676333 | 0.048088667 | 302.9146854 |
| 3 | B14 | 28839 | CG16844  | 11.26479433 | 0.041860333 | 269.1042674 |
| 3 | B15 | 31764 | CG3251   | 13.08089667 | 0.052932667 | 247.1233265 |
| 3 | B16 | 28843 | CG17086  | 11.207296   | 0.044123    | 254.0012239 |
| 3 | B17 | 31772 | CG10383  | 9.228385    | 0.036494333 | 252.8717244 |

|   |     |       |         |             |             |             |
|---|-----|-------|---------|-------------|-------------|-------------|
| 3 | B18 | 28832 | CG15918 | 14.49421667 | 0.041642    | 348.0672558 |
| 3 | B19 | 31756 | CG8877  | 6.667669667 | 0.051257667 | 130.0814122 |
| 3 | B20 | 28838 | CG16798 | 10.913115   | 0.037182333 | 293.5026939 |
| 3 | B21 | 31789 | CG10977 | 14.96657    | 0.042488667 | 352.2485212 |
| 3 | B22 | 28840 | CG16926 | 12.50222333 | 0.037736    | 331.3075931 |
| 3 | B23 | 31748 | CG16940 | 11.36743    | 0.040028667 | 283.9822294 |
| 3 | B24 | 28845 | CG17163 | 8.668071333 | 0.034033    | 254.6960695 |
| 3 | C01 | 32460 | CG32815 | 11.18949667 | 0.058161333 | 192.3872103 |
| 3 | C02 | 32380 | CG15599 | 8.822106333 | 0.056069    | 157.3437431 |
| 3 | C03 | 32485 | CG40067 | 10.10747033 | 0.053566667 | 188.689552  |
| 3 | C04 | 32396 | CG30148 | 10.503403   | 0.052858667 | 198.7073012 |
| 3 | C05 | 32469 | CG33082 | 7.370462667 | 0.045268667 | 162.8159875 |
| 3 | C06 | 32373 | CG15510 | 9.301239333 | 0.052569    | 176.9339218 |
| 3 | C07 | 32477 | CG33189 | 6.878372333 | 0.054589    | 126.0029005 |
| 3 | C08 | 32389 | CG18028 | 14.27868    | 0.071603    | 199.4145497 |
| 3 | C09 | 32493 | CG40143 | 10.48758233 | 0.043425    | 241.5102437 |
| 3 | C10 | 29701 | CG31611 | 3.149455333 | 0.0246      | 128.0266396 |
| 3 | C11 | 32459 | CG32811 | 8.142485667 | 0.048456667 | 168.0364381 |
| 3 | C12 | 29702 | CG3163  | 11.907595   | 0.050386    | 236.3274521 |
| 3 | C13 | 32309 | CG14451 | 12.68001833 | 0.045728    | 277.2922134 |
| 3 | C14 | 29703 | CG31652 | 10.54752967 | 0.044377667 | 237.6765265 |
| 3 | C15 | 32358 | CG14806 | 9.641178    | 0.044356333 | 217.3574161 |
| 3 | C16 | 29705 | CG31689 | 10.22490967 | 0.043177667 | 236.8101488 |
| 3 | C17 | 32317 | CG14482 | 9.705315333 | 0.050152333 | 193.5167257 |
| 3 | C18 | 29695 | CG33196 | 9.573274667 | 0.042219667 | 226.7491769 |
| 3 | C19 | 32325 | CG14501 | 11.69687867 | 0.041799333 | 279.8340962 |
| 3 | C20 | 29706 | CG31709 | 9.765937667 | 0.038738333 | 252.100099  |
| 3 | C21 | 32333 | CG14607 | 11.429396   | 0.043465667 | 262.9522765 |
| 3 | C22 | 29708 | CG3174  | 10.583828   | 0.046979333 | 225.2868921 |
| 3 | C23 | 32365 | CG14876 | 12.56655267 | 0.045148667 | 278.3371823 |
| 3 | C24 | 29704 | CG3167  | 9.802074333 | 0.041428667 | 236.6012503 |
| 3 | D01 | 29688 | CG31786 | 11.26597667 | 0.066067    | 170.523509  |
| 3 | D02 | 31820 | CG15128 | 8.925812667 | 0.058407333 | 152.8200683 |
| 3 | D03 | 29686 | CG31759 | 8.309897667 | 0.050076667 | 165.9435066 |
| 3 | D04 | 31812 | CG9087  | 10.26976633 | 0.058218333 | 176.4008989 |
| 3 | D05 | 29699 | CG31776 | 11.57398    | 0.054448667 | 212.5668213 |
| 3 | D06 | 28848 | CG1667  | 9.751100667 | 0.049331667 | 197.6641238 |
| 3 | D07 | 29768 | CG31750 | 8.174879667 | 0.051052333 | 160.1274444 |
| 3 | D08 | 28849 | CG16738 | 10.45238133 | 0.050909    | 205.315     |
| 3 | D09 | 31733 | CG10170 | 7.475998667 | 0.047392667 | 157.745896  |
| 3 | D10 | 28853 | CG16979 | 8.494063667 | 0.045624    | 186.175339  |
| 3 | D11 | 31741 | CG1539  | 8.248835    | 0.04815     | 171.3153686 |
| 3 | D12 | 28854 | CG17029 | 10.03434033 | 0.047197    | 212.6054693 |
| 3 | D13 | 31797 | CG10300 | 10.36022233 | 0.048152333 | 215.1551465 |
| 3 | D14 | 28851 | CG16874 | 10.15469833 | 0.048969333 | 207.3685232 |
| 3 | D15 | 31765 | CG10564 | 8.792593    | 0.045005667 | 195.3663539 |
| 3 | D16 | 28855 | CG17107 | 9.942778    | 0.049900667 | 199.2514061 |
| 3 | D17 | 31773 | CG14785 | 10.69658967 | 0.039669667 | 269.6415313 |
| 3 | D18 | 28844 | CG15919 | 10.90251333 | 0.038402333 | 283.902367  |
| 3 | D19 | 31757 | CG10098 | 11.19765    | 0.048150667 | 232.5544125 |
| 3 | D20 | 28850 | CG16799 | 11.09726667 | 0.046634    | 237.965147  |
| 3 | D21 | 31810 | CG10243 | 11.94464333 | 0.040582    | 294.3335305 |
| 3 | D22 | 28852 | CG16931 | 9.210023667 | 0.038252333 | 240.770245  |
| 3 | D23 | 31786 | CG10628 | 9.157109667 | 0.042127333 | 217.3674178 |



|   |     |       |         |             |             |             |
|---|-----|-------|---------|-------------|-------------|-------------|
| 3 | D24 | 28857 | CG40146 | 9.043151    | 0.037607    | 240.4645678 |
| 3 | E01 | 32461 | CG32816 | 6.134710333 | 0.069425667 | 88.36372235 |
| 3 | E02 | 32381 | CG15602 | 7.480704    | 0.062559333 | 119.5777449 |
| 3 | E03 | 32467 | CG32924 | 8.702176333 | 0.062852667 | 138.453574  |
| 3 | E04 | 32397 | CG30189 | 9.061070667 | 0.065019667 | 139.3589222 |
| 3 | E05 | 32470 | CG33083 | 7.565601333 | 0.059185667 | 127.8282692 |
| 3 | E06 | 32374 | CG15520 | 9.019059333 | 0.050181667 | 179.7281743 |
| 3 | E07 | 32478 | CG33200 | 9.897956333 | 0.063656    | 155.4913336 |
| 3 | E08 | 32390 | CG18140 | 8.871652333 | 0.058167333 | 152.5194955 |
| 3 | E09 | 32494 | CG40158 | 8.550539333 | 0.060096    | 142.2813387 |
| 3 | E10 | 29713 | CG31613 | 2.446830667 | 0.032366    | 75.59879709 |
| 3 | E11 | 32340 | CG14630 | 6.620178667 | 0.049041    | 134.992734  |
| 3 | E12 | 29714 | CG31630 | 9.505998667 | 0.050578    | 187.9473025 |
| 3 | E13 | 32310 | CG14455 | 9.180845    | 0.050921    | 180.2958504 |
| 3 | E14 | 29715 | CG31653 | 7.579509667 | 0.044836    | 169.0496402 |
| 3 | E15 | 32350 | CG14716 | 7.637712    | 0.052147    | 146.4650315 |
| 3 | E16 | 29717 | CG31693 | 8.753708333 | 0.047718333 | 183.4453914 |
| 3 | E17 | 32318 | CG14485 | 8.763318333 | 0.049869333 | 175.7255962 |
| 3 | E18 | 29709 | CG31600 | 9.379239667 | 0.04659     | 201.314438  |
| 3 | E19 | 32326 | CG14512 | 8.762036667 | 0.042885    | 204.3147177 |
| 3 | E20 | 29718 | CG31713 | 8.062187333 | 0.03575     | 225.5157296 |
| 3 | E21 | 32334 | CG14608 | 9.467853333 | 0.045132    | 209.781382  |
| 3 | E22 | 29720 | CG31742 | 7.699391667 | 0.036680667 | 209.9032642 |
| 3 | E23 | 32366 | CG14889 | 9.657995333 | 0.043122    | 223.9690954 |
| 3 | E24 | 29716 | CG31674 | 9.551329    | 0.045025    | 212.1339034 |
| 3 | F01 | 29700 | CG31787 | 8.353332667 | 0.072958667 | 114.4940423 |
| 3 | F02 | 31821 | CG15929 | 8.278719    | 0.070902667 | 116.7617438 |
| 3 | F03 | 29770 | CG31771 | 6.993068333 | 0.061963333 | 112.8581688 |
| 3 | F04 | 31819 | CG30443 | 7.198057667 | 0.059886333 | 120.1953312 |
| 3 | F05 | 29711 | CG31777 | 8.580851333 | 0.050440333 | 170.1188467 |
| 3 | F06 | 28860 | CG16704 | 7.717778333 | 0.051933    | 148.6102927 |
| 3 | F07 | 29780 | CG31758 | 8.762752    | 0.051329333 | 170.7162636 |
| 3 | F08 | 28861 | CG16742 | 9.828843    | 0.060132667 | 163.4526381 |
| 3 | F09 | 31734 | CG10013 | 4.009824667 | 0.066855667 | 59.97733426 |
| 3 | F10 | 28865 | CG16997 | 8.225254    | 0.052571    | 156.4599114 |
| 3 | F11 | 31742 | CG10061 | 9.486076    | 0.050118    | 189.2748314 |
| 3 | F12 | 28866 | CG32843 | 8.597862333 | 0.052224667 | 164.6322108 |
| 3 | F13 | 31798 | CG5844  | 1.264243333 | 0.017892333 | 70.65838255 |
| 3 | F14 | 28863 | CG32975 | 6.679892    | 0.047342    | 141.0986439 |
| 3 | F15 | 31766 | CG10071 | 9.070848    | 0.053305333 | 170.1677381 |
| 3 | F16 | 28867 | CG17108 | 9.477876667 | 0.049144667 | 192.8566681 |
| 3 | F17 | 31774 | CG10110 | 17.87223333 | 0.046015    | 388.4001594 |
| 3 | F18 | 28856 | CG15922 | 6.339387333 | 0.035259333 | 179.7931706 |
| 3 | F19 | 31809 | CG1837  | 8.544119    | 0.041719333 | 204.7999888 |
| 3 | F20 | 28859 | CG17234 | 7.158364    | 0.045015667 | 159.0193932 |
| 3 | F21 | 31791 | CG10067 | 8.222126    | 0.038779667 | 212.0215749 |
| 3 | F22 | 28864 | CG16937 | 8.893875333 | 0.036145    | 246.0610135 |
| 3 | F23 | 31750 | CG18466 | 10.70581167 | 0.053772    | 199.0964009 |
| 3 | F24 | 28919 | CG17249 | 7.508733333 | 0.043698667 | 171.8298041 |
| 3 | G01 | 32462 | CG32845 | 12.6941     | 0.049576    | 256.0533323 |
| 3 | G02 | 32382 | CG15657 | 10.31425767 | 0.047215333 | 218.4514423 |
| 3 | G03 | 32487 | CG40113 | 11.4361     | 0.046663333 | 245.0767912 |
| 3 | G04 | 32398 | CG30191 | 11.014037   | 0.054475    | 202.1851675 |
| 3 | G05 | 32471 | CG33120 | 10.570558   | 0.049903333 | 211.82068   |

|   |     |       |         |             |             |             |
|---|-----|-------|---------|-------------|-------------|-------------|
| 3 | G06 | 32375 | CG15530 | 10.90111333 | 0.045787667 | 238.0796867 |
| 3 | G07 | 32479 | CG33204 | 12.30187233 | 0.053193    | 231.2686318 |
| 3 | G08 | 32369 | CG15068 | 12.14811667 | 0.050844667 | 238.9260755 |
| 3 | G09 | 32495 | CG40165 | 8.746047333 | 0.050862333 | 171.9552911 |
| 3 | G10 | 29725 | CG31617 | 8.759249    | 0.069185333 | 126.6055763 |
| 3 | G11 | 32341 | CG14639 | 12.34766333 | 0.047879    | 257.8930916 |
| 3 | G12 | 29726 | CG31639 | 14.39626667 | 0.057186    | 251.7445995 |
| 3 | G13 | 32311 | CG14456 | 12.86408    | 0.051648333 | 249.0705734 |
| 3 | G14 | 29727 | CG4260  | 23.33857667 | 0.039367    | 592.8462079 |
| 3 | G15 | 32351 | CG14718 | 12.47487    | 0.046303333 | 269.4162407 |
| 3 | G16 | 29729 | CG31695 | 10.86433667 | 0.045055667 | 241.1314152 |
| 3 | G17 | 32319 | CG14489 | 13.52576    | 0.039454333 | 342.820645  |
| 3 | G18 | 29721 | CG31601 | 11.010944   | 0.043941333 | 250.5828377 |
| 3 | G19 | 32327 | CG14523 | 11.67326667 | 0.042936333 | 271.8738597 |
| 3 | G20 | 29730 | CG31715 | 10.01760267 | 0.040185333 | 249.285046  |
| 3 | G21 | 32335 | CG14609 | 11.66015667 | 0.038556333 | 302.418712  |
| 3 | G22 | 29732 | CG31745 | 11.68197333 | 0.035849    | 325.8660865 |
| 3 | G23 | 32363 | CG14860 | 12.27883833 | 0.040735333 | 301.4296761 |
| 3 | G24 | 29728 | CG31677 | 10.03535433 | 0.037069333 | 270.7185005 |
| 3 | H01 | 29712 | CG31788 | 14.74356    | 0.063169    | 233.3986607 |
| 3 | H02 | 31822 | CG5993  | 12.785548   | 0.057716667 | 221.5226336 |
| 3 | H03 | 29710 | CG31765 | 10.78555067 | 0.049047333 | 219.9008577 |
| 3 | H04 | 31814 | CG10326 | 11.74566667 | 0.055662333 | 211.0164264 |
| 3 | H05 | 29723 | CG31778 | 10.87164767 | 0.055254333 | 196.7564716 |
| 3 | H06 | 28872 | CG1671  | 6.067169667 | 0.06362     | 95.36576024 |
| 3 | H07 | 29772 | CG31796 | 11.56600333 | 0.054846667 | 210.8788744 |
| 3 | H08 | 28873 | CG16753 | 11.70685667 | 0.050309333 | 232.6975114 |
| 3 | H09 | 31735 | CG11977 | 9.771306    | 0.054734333 | 178.5224265 |
| 3 | H10 | 28877 | CG17002 | 9.956476667 | 0.041763667 | 238.4004438 |
| 3 | H11 | 31743 | CG6761  | 12.26879667 | 0.044309667 | 276.8875866 |
| 3 | H12 | 28878 | CG17049 | 11.08768667 | 0.048763667 | 227.3759835 |
| 3 | H13 | 31799 | CG16905 | 5.119619    | 0.036156    | 141.5980474 |
| 3 | H14 | 28875 | CG16884 | 12.56689667 | 0.043184    | 291.0081666 |
| 3 | H15 | 31767 | CG10527 | 10.46141667 | 0.042419333 | 246.6190731 |
| 3 | H16 | 28879 | CG17144 | 15.12600667 | 0.050815667 | 297.6642374 |
| 3 | H17 | 31775 | CG10575 | 11.00574333 | 0.038131333 | 288.6272881 |
| 3 | H18 | 28868 | CG15925 | 12.04867    | 0.041714333 | 288.8376497 |
| 3 | H19 | 31759 | CG10361 | 9.855954    | 0.035658333 | 276.3997383 |
| 3 | H20 | 28871 | CG17239 | 9.605892    | 0.036198    | 265.370794  |
| 3 | H21 | 31792 | CG10447 | 7.038693    | 0.034946    | 201.4162708 |
| 3 | H22 | 28917 | CG40145 | 10.794973   | 0.049706    | 217.1764576 |
| 3 | H23 | 31751 | CG10395 | 14.28203333 | 0.04905     | 291.1729528 |
| 3 | H24 | 28881 | CG17168 | 9.208315667 | 0.045256333 | 203.4702104 |
| 3 | I01 | 32463 | CG32846 | 12.39139933 | 0.065899333 | 188.035276  |
| 3 | I02 | 32383 | CG15693 | 1.86751     | 0.045094667 | 41.41310133 |
| 3 | I03 | 32488 | CG40117 | 14.39049667 | 0.062711333 | 229.4720253 |
| 3 | I04 | 32399 | CG30195 | 12.20564333 | 0.058505333 | 208.6244559 |
| 3 | I05 | 32472 | CG33125 | 11.565694   | 0.053059    | 217.9779868 |
| 3 | I06 | 32376 | CG15537 | 12.33117933 | 0.052271333 | 235.9071129 |
| 3 | I07 | 32480 | CG40000 | 12.82354333 | 0.063559    | 201.758104  |
| 3 | I08 | 32370 | CG15218 | 5.23568     | 0.073380333 | 71.34990756 |
| 3 | I09 | 32496 | CG40176 | 14.53034333 | 0.062885667 | 231.0597009 |
| 3 | I10 | 29737 | CG31618 | 1.467608333 | 0.020443667 | 71.78792128 |
| 3 | I11 | 32342 | CG14642 | 11.05393667 | 0.050650333 | 218.2401564 |

|   |     |       |         |             |             |             |
|---|-----|-------|---------|-------------|-------------|-------------|
| 3 | I12 | 29738 | CG31643 | 11.80460667 | 0.043752333 | 269.8051913 |
| 3 | I13 | 32312 | CG14458 | 14.95442333 | 0.059072    | 253.1558663 |
| 3 | I14 | 29739 | CG31658 | 10.87227    | 0.042693667 | 254.6576776 |
| 3 | I15 | 32352 | CG14743 | 11.86443667 | 0.041620333 | 285.0634706 |
| 3 | I16 | 29741 | CG31697 | 13.28249733 | 0.049094333 | 270.5505184 |
| 3 | I17 | 32320 | CG14491 | 14.67053667 | 0.055514333 | 264.2657452 |
| 3 | I18 | 29733 | CG31605 | 9.878877667 | 0.262723333 | 37.60182829 |
| 3 | I19 | 32328 | CG14546 | 13.34897867 | 0.044383667 | 300.7633138 |
| 3 | I20 | 29742 | CG31717 | 12.24857    | 0.042526333 | 288.0231856 |
| 3 | I21 | 32336 | CG14612 | 14.46617333 | 0.044968    | 321.6992825 |
| 3 | I22 | 29744 | CG31747 | 13.29836333 | 0.048299333 | 275.3322337 |
| 3 | I23 | 32368 | CG14905 | 11.54551267 | 0.036943    | 312.5223362 |
| 3 | I24 | 29779 | CG31737 | 15.2555     | 0.038903    | 392.1419942 |
| 3 | J01 | 29724 | CG31789 | 14.67440667 | 0.063532333 | 230.9754088 |
| 3 | J02 | 31823 | CG6308  | 10.13284767 | 0.063894667 | 158.5867522 |
| 3 | J03 | 29722 | CG31766 | 11.39474533 | 0.051974333 | 219.2379315 |
| 3 | J04 | 31815 | CG3321  | 8.251134    | 0.037505667 | 219.996996  |
| 3 | J05 | 29735 | CG31781 | 12.01667667 | 0.056442    | 212.9030982 |
| 3 | J06 | 28884 | CG16710 | 11.711738   | 0.055216667 | 212.1051253 |
| 3 | J07 | 31781 | CG5206  | 50.47839333 | 0.059622667 | 846.6309234 |
| 3 | J08 | 28885 | CG16772 | 13.46549    | 0.052923333 | 254.4338981 |
| 3 | J09 | 31736 | CG31321 | 11.80870833 | 0.055176    | 214.0189273 |
| 3 | J10 | 28889 | CG17019 | 11.21114533 | 0.051022333 | 219.7301574 |
| 3 | J11 | 31744 | CG14614 | 8.028072667 | 0.044401667 | 180.8056604 |
| 3 | J12 | 28890 | CG17059 | 12.65889667 | 0.063535667 | 199.2407939 |
| 3 | J13 | 31800 | CG17154 | 13.21849    | 0.045879    | 288.1163495 |
| 3 | J14 | 28887 | CG16887 | 13.88219    | 0.048815667 | 284.3798098 |
| 3 | J15 | 31768 | CG4107  | 15.4529     | 0.041832667 | 369.3979187 |
| 3 | J16 | 28891 | CG17146 | 14.05653    | 0.045221333 | 310.8384686 |
| 3 | J17 | 31776 | CG10113 | 8.290563    | 0.046306667 | 179.0360567 |
| 3 | J18 | 28924 | CG16975 | 9.408648667 | 0.052449    | 179.3866168 |
| 3 | J19 | 31760 | CG15728 | 14.17733633 | 0.047944667 | 295.7020524 |
| 3 | J20 | 28886 | CG16813 | 11.2368     | 0.038713333 | 290.2565869 |
| 3 | J21 | 31793 | CG7392  | 2.430616667 | 0.038371    | 63.34514781 |
| 3 | J22 | 28888 | CG16957 | 12.97978333 | 0.042578667 | 304.8424093 |
| 3 | J23 | 31811 | CG5938  | 11.25294433 | 0.042784667 | 263.0134861 |
| 3 | J24 | 28893 | CG17169 | 7.738747    | 0.038393333 | 201.5648637 |
| 3 | K02 | 32384 | CG15707 | 15.58179    | 0.062392    | 249.7401911 |
| 3 | K03 | 32489 | CG40120 | 13.53736333 | 0.059015    | 229.388517  |
| 3 | K04 | 32400 | CG30196 | 13.77551667 | 0.049661    | 277.3910446 |
| 3 | K05 | 32473 | CG33136 | 13.06879667 | 0.058365667 | 223.9124028 |
| 3 | K06 | 32403 | CG30263 | 12.96906667 | 0.058891    | 220.2215392 |
| 3 | K07 | 32481 | CG40045 | 14.88035667 | 0.055292333 | 269.1215178 |
| 3 | K08 | 32393 | CG30141 | 11.04801733 | 0.054931667 | 201.1229224 |
| 3 | K09 | 32497 | CG40177 | 15.42847667 | 0.065218333 | 236.5665585 |
| 3 | K1  | 32464 | CG32852 | 12.33537267 | 0.065852333 | 187.3186878 |
| 3 | K10 | 29749 | CG31620 | 13.22229    | 0.046760667 | 282.7652158 |
| 3 | K11 | 32343 | CG14643 | 10.69519667 | 0.053054    | 201.5907692 |
| 3 | K12 | 29750 | CG31644 | 14.37107333 | 0.052996333 | 271.1710873 |
| 3 | K13 | 32313 | CG14460 | 19.32587    | 0.059545333 | 324.5572561 |
| 3 | K14 | 29751 | CG31659 | 13.54365333 | 0.045615333 | 296.9101033 |
| 3 | K15 | 32353 | CG14747 | 12.06993333 | 0.046057333 | 262.0632255 |
| 3 | K16 | 29753 | CG31699 | 15.80114    | 0.052824333 | 299.1261603 |
| 3 | K17 | 32359 | CG14812 | 12.51539    | 0.039422333 | 317.4695393 |

|   |     |       |         |             |             |             |
|---|-----|-------|---------|-------------|-------------|-------------|
| 3 | K18 | 29745 | CG31606 | 11.25062633 | 0.048912667 | 230.014577  |
| 3 | K19 | 32362 | CG14853 | 10.88701    | 0.051894667 | 209.7905372 |
| 3 | K20 | 29776 | CG31686 | 12.48320667 | 0.044889667 | 278.0864193 |
| 3 | K21 | 32347 | CG14678 | 11.95489    | 0.048393667 | 247.0341849 |
| 3 | K22 | 29743 | CG31730 | 14.79214333 | 0.04543     | 325.6029789 |
| 3 | K23 | 32356 | CG14796 | 15.71393    | 0.046616333 | 337.0906478 |
| 3 | K24 | 29752 | CG31680 | 13.56474667 | 0.040943333 | 331.3053814 |
| 3 | L01 | 29736 | CG31790 | 15.90106333 | 0.064365333 | 247.0439056 |
| 3 | L02 | 31824 | CG10686 | 12.55234    | 0.058834    | 213.3518034 |
| 3 | L03 | 29734 | CG31768 | 12.80267667 | 0.058966667 | 217.1171849 |
| 3 | L04 | 31816 | CG10138 | 14.44096333 | 0.063950333 | 225.8152942 |
| 3 | L05 | 29747 | CG31783 | 12.27058333 | 0.062524667 | 196.2518793 |
| 3 | L06 | 28896 | CG16712 | 11.91121667 | 0.056710667 | 210.0348553 |
| 3 | L07 | 31782 | CG10011 | 12.67072333 | 0.047951667 | 264.2394773 |
| 3 | L08 | 28897 | CG16777 | 14.78404667 | 0.064776667 | 228.2310503 |
| 3 | L09 | 31737 | CG5820  | 13.76301333 | 0.055083    | 249.8595453 |
| 3 | L10 | 28901 | CG17023 | 9.276051    | 0.045322    | 204.6699395 |
| 3 | L11 | 31745 | CG12576 | 12.27180333 | 0.044566333 | 275.3603991 |
| 3 | L12 | 28902 | CG17075 | 11.59999667 | 0.056129667 | 206.6642714 |
| 3 | L13 | 31801 | CG12623 | 13.64562    | 0.050333667 | 271.1032377 |
| 3 | L14 | 28899 | CG16889 | 10.92902    | 0.053792    | 203.1718471 |
| 3 | L15 | 31769 | CG8782  | 11.23658433 | 0.04568     | 245.9847709 |
| 3 | L16 | 28903 | CG17153 | 15.49386667 | 0.054809667 | 282.6849278 |
| 3 | L17 | 31804 | CG2034  | 12.92847    | 0.046213    | 279.7582931 |
| 3 | L18 | 28892 | CG1605  | 10.00133433 | 0.042135667 | 237.3602965 |
| 3 | L19 | 31761 | CG10324 | 8.459966    | 0.052618667 | 160.7787984 |
| 3 | L20 | 28898 | CG16815 | 12.23738333 | 0.042735    | 286.3550564 |
| 3 | L21 | 31794 | CG16788 | 15.42678    | 0.043970667 | 350.8425314 |
| 3 | L22 | 28900 | CG16973 | 18.32487333 | 0.057020333 | 321.3743635 |
| 3 | L23 | 31753 | CG15529 | 14.08067667 | 0.044713667 | 314.9076718 |
| 3 | L24 | 28905 | CG17170 | 20.84313667 | 0.050722333 | 410.9262192 |
| 3 | M01 | 32456 | CG32801 | 12.063874   | 0.060261    | 200.193724  |
| 3 | M02 | 32387 | CG15757 | 12.42134    | 0.058312    | 213.0151598 |
| 3 | M03 | 32490 | CG40128 | 13.07744    | 0.059479333 | 219.8652753 |
| 3 | M04 | 32395 | CG30145 | 11.665063   | 0.052073    | 224.0136539 |
| 3 | M05 | 32474 | CG33137 | 14.80726667 | 0.057665667 | 256.7778632 |
| 3 | M06 | 32378 | CG15555 | 11.13521967 | 0.049907333 | 223.1179052 |
| 3 | M07 | 32482 | CG40049 | 12.01851    | 0.057425    | 209.2905529 |
| 3 | M08 | 32394 | CG30142 | 10.28968533 | 0.053647    | 191.8035553 |
| 3 | M09 | 32498 | CG40191 | 13.78722    | 0.050873333 | 271.0107456 |
| 3 | M10 | 29761 | CG31622 | 12.38638667 | 0.050998    | 242.8798515 |
| 3 | M11 | 32344 | CG14645 | 12.03209    | 0.046954333 | 256.2508963 |
| 3 | M12 | 29762 | CG31647 | 13.83561667 | 0.054417    | 254.2517351 |
| 3 | M13 | 32314 | CG14462 | 11.76785333 | 0.045017667 | 261.4052261 |
| 3 | M14 | 29763 | CG31661 | 11.62623    | 0.050249    | 231.3723656 |
| 3 | M15 | 32354 | CG14781 | 12.70287333 | 0.057539    | 220.7697967 |
| 3 | M16 | 29765 | CG31700 | 13.01869333 | 0.046129667 | 282.2195406 |
| 3 | M17 | 32322 | CG14493 | 12.82364667 | 0.044445667 | 288.5241156 |
| 3 | M18 | 29757 | CG31607 | 10.89287367 | 0.044223333 | 246.315075  |
| 3 | M19 | 32330 | CG14575 | 12.63349333 | 0.047629667 | 265.2442105 |
| 3 | M20 | 29766 | CG31720 | 11.86467    | 0.037413333 | 317.1241091 |
| 3 | M21 | 32338 | CG14617 | 15.30715667 | 0.043447667 | 352.3125139 |
| 3 | M22 | 29755 | CG31735 | 13.89109    | 0.039200667 | 354.3585143 |
| 3 | M23 | 32357 | CG14803 | 14.63075    | 0.044217    | 330.8851799 |

|   |     |       |          |             |             |             |
|---|-----|-------|----------|-------------|-------------|-------------|
| 3 | M24 | 29764 | CG31681  | 14.51266    | 0.039203333 | 370.1894397 |
| 3 | N01 | 29748 | CG31792  | 16.44899333 | 0.068678333 | 239.5077535 |
| 3 | N02 | 31825 | CG10265  | 13.5853     | 0.074563333 | 182.1981313 |
| 3 | N03 | 29746 | CG31769  | 12.56076667 | 0.065386333 | 192.1007958 |
| 3 | N04 | 31827 | CG12163  | 12.48628667 | 0.075652    | 165.0489963 |
| 3 | N05 | 29759 | CG31784  | 13.08740333 | 0.054524667 | 240.0272048 |
| 3 | N06 | 28908 | CG16717  | 13.40615333 | 0.053096667 | 252.4857807 |
| 3 | N07 | 31783 | CG10477  | 12.26667667 | 0.052716667 | 232.6906734 |
| 3 | N08 | 28909 | CG16789  | 14.50119667 | 0.059959333 | 241.850532  |
| 3 | N09 | 31738 | CG10246  | 10.13209967 | 0.055625333 | 182.1490148 |
| 3 | N10 | 28913 | CG17025  | 10.16465133 | 0.048689    | 208.7668946 |
| 3 | N11 | 31746 | CG1057   | 9.806933333 | 0.035139667 | 279.0844155 |
| 3 | N12 | 28914 | CG17083  | 10.72522833 | 0.047109667 | 227.6651289 |
| 3 | N13 | 31802 | CG10465  | 8.864869333 | 0.047043333 | 188.4405017 |
| 3 | N14 | 28911 | CG1690   | 12.12044667 | 0.058152    | 208.4269959 |
| 3 | N15 | 31770 | CG3871   | 11.61311333 | 0.042753    | 271.6327119 |
| 3 | N16 | 28907 | CG17246  | 12.29914667 | 0.046213667 | 266.1365685 |
| 3 | N17 | 31778 | CG15377  | 10.77134467 | 0.043225333 | 249.1905518 |
| 3 | N18 | 28904 | CG1621   | 3.111383333 | 0.042036333 | 74.01652539 |
| 3 | N19 | 31762 | CG14041  | 14.08450667 | 0.040924667 | 344.1569062 |
| 3 | N20 | 28910 | CG16827  | 12.80089    | 0.038041    | 336.5024579 |
| 3 | N21 | 31755 | CG16801  | 13.96192    | 0.047988    | 290.9460699 |
| 3 | N22 | 28912 | CG16974  | 12.64408333 | 0.038167667 | 331.2773464 |
| 3 | N23 | 31754 | CG1034   | 12.45958    | 0.037842    | 329.2526822 |
| 3 | N24 | 29305 | CG30192  | 11.10856333 | 0.038559333 | 288.0901295 |
| 3 | O01 | 32457 | CG32803  | 10.89186333 | 0.068708    | 158.5239468 |
| 3 | O02 | 32386 | CG15717  | 8.955795667 | 0.060343    | 148.414823  |
| 3 | O03 | 32491 | CG40129  | 12.10568367 | 0.057302    | 211.261102  |
| 3 | O04 | 32402 | CG30219  | 14.08865    | 0.057596333 | 244.6101893 |
| 3 | O05 | 32475 | CG33140  | 13.89757    | 0.068526667 | 202.8052826 |
| 3 | O06 | 32379 | CG15580  | 11.92765    | 0.05541     | 215.2616856 |
| 3 | O07 | 32483 | CG40057  | 11.43035667 | 0.052211667 | 218.9234207 |
| 3 | O08 | 29767 | CG31736  | 10.92085067 | 0.052935    | 206.3068039 |
| 3 | O09 | 32499 | CG40195  | 13.51627    | 0.062903    | 214.8748072 |
| 3 | O10 | 29773 | CG31623  | 11.43579733 | 0.046911    | 243.7764561 |
| 3 | O11 | 32346 | CG14655  | 12.66776333 | 0.053899    | 235.0277989 |
| 3 | O12 | 29774 | CG31648  | 12.12063667 | 0.047935    | 252.8556726 |
| 3 | O13 | 32315 | CG14463  | 13.21246667 | 0.064532    | 204.7428666 |
| 3 | O14 | 29775 | CG31664  | 12.698567   | 0.046776333 | 271.4741857 |
| 3 | O15 | 32355 | CG14787  | 9.096009667 | 0.046558333 | 195.3680258 |
| 3 | O16 | 29777 | CG31704  | 13.21057667 | 0.043929    | 300.7256406 |
| 3 | O17 | 32323 | CG14495  | 12.76656667 | 0.042540333 | 300.1049984 |
| 3 | O18 | 29769 | CG31609  | 12.73639667 | 0.045372    | 280.7104969 |
| 3 | O19 | 32331 | CG14586  | 13.27744    | 0.040601333 | 327.0198023 |
| 3 | O20 | 29778 | CG31723  | 11.62317    | 0.041859    | 277.6743353 |
| 3 | O21 |       | wts      | 57.18345333 | 0.032708    | 1748.301741 |
| 3 | O22 |       | HFA17794 | 1.240625333 | 0.009439333 | 131.431457  |
| 3 | O23 |       | hpo      | 35.97282    | 0.03476     | 1034.891254 |
| 3 | O24 |       | Luc      | 1.606353    | 0.039565    | 40.60035385 |
| 3 | P01 | 29760 | CG31794  | 10.55455133 | 0.065368    | 161.4635805 |
| 3 | P02 | 31826 | CG10498  | 5.837885333 | 0.054128333 | 107.8526711 |
| 3 | P03 | 29758 | CG31770  | 11.59650667 | 0.059454333 | 195.0489732 |
| 3 | P04 | 31818 | CG10562  | 10.132742   | 0.063686    | 159.1047012 |
| 3 | P05 | 29771 | CG31785  | 11.05645    | 0.063441333 | 174.2783359 |

|   |     |       |          |             |             |             |
|---|-----|-------|----------|-------------|-------------|-------------|
| 3 | P06 | 28920 | CG16719  | 12.85897333 | 0.060998333 | 210.8086013 |
| 3 | P07 | 31806 | CG3611   | 9.358123    | 0.063074667 | 148.365794  |
| 3 | P08 | 28921 | CG16792  | 8.287317667 | 0.086345667 | 95.97838533 |
| 3 | P09 | 31739 | CG1307   | 10.67797467 | 0.058482    | 182.5856617 |
| 3 | P10 | 28925 | CG17026  | 9.780134333 | 0.055670333 | 175.6794642 |
| 3 | P11 | 31747 | CG13849  | 5.072520333 | 0.048177667 | 105.2877959 |
| 3 | P12 | 28926 | CG17084  | 10.16598333 | 0.047573    | 213.6922904 |
| 3 | P13 | 31803 | CG10308  | 10.98450533 | 0.045376667 | 242.0738706 |
| 3 | P14 | 28895 | CG17242  | 11.07333933 | 0.047556667 | 232.8451532 |
| 3 | P15 | 31807 | CG10428  | 10.72442633 | 0.043142667 | 248.5805158 |
| 3 | P16 | 28927 | CG40460  | 10.54819667 | 0.048820333 | 216.0615454 |
| 3 | P17 | 31779 | CG1070   | 11.117202   | 0.048699667 | 228.2808643 |
| 3 | P18 | 28916 | CG1635   | 11.019315   | 0.054573667 | 201.9163394 |
| 3 | P19 | 31785 | CG15275  | 6.554082333 | 0.048592    | 134.8798636 |
| 3 | P20 | 28922 | CG16840  | 10.22310733 | 0.043172    | 236.7994842 |
| 3 | P21 |       | wts      | 50.42685    | 0.033821333 | 1490.977588 |
| 3 | P22 |       | HFA17794 | 1.013693667 | 0.009825    | 103.1749279 |
| 3 | P23 |       | hpo      | 40.46954667 | 0.034757667 | 1164.334391 |
| 3 | P24 |       | Luc      | 1.620443    | 0.045391    | 35.69965412 |
| 4 | A01 |       | DIAP1    | 0.504135333 | 0.008262333 | 61.01609715 |
| 4 | A02 |       | ex/ft    | 41.13373333 | 0.046995    | 875.2789304 |
| 4 | A03 |       | Luc      | 1.510459667 | 0.046847333 | 32.2421696  |
| 4 | A04 |       | hpo      | 28.52906    | 0.045689667 | 624.409458  |
| 4 | A05 | 29307 | CG30285  | 9.997677667 | 0.053603667 | 186.5110782 |
| 4 | A06 | 28640 | CG32950  | 11.88341333 | 0.047679333 | 249.236147  |
| 4 | A07 | 29310 | CG30352  | 12.25108    | 0.049614333 | 246.9262243 |
| 4 | A08 | 28647 | CG14560  | 10.55872733 | 0.051575667 | 204.7230412 |
| 4 | A09 | 29312 | CG30373  | 11.90112    | 0.05023     | 236.9325105 |
| 4 | A10 | 28649 | CG14660  | 11.28242    | 0.049265333 | 229.0133698 |
| 4 | A11 | 29302 | CG30386  | 10.32573033 | 0.047832333 | 215.8734399 |
| 4 | A12 | 28651 | CG14830  | 11.38529333 | 0.042701    | 266.6282601 |
| 4 | A13 | 29306 | CG30270  | 10.03767533 | 0.045731    | 219.4938955 |
| 4 | A14 | 28641 | CG14868  | 10.413547   | 0.046913    | 221.975721  |
| 4 | A15 | 29308 | CG30322  | 11.13031333 | 0.040955    | 271.7693403 |
| 4 | A16 | 28642 | CG14943  | 10.45895633 | 0.040826667 | 256.1795314 |
| 4 | A17 | 29303 | CG30413  | 11.19650767 | 0.041889333 | 267.287798  |
| 4 | A18 | 28643 | CG14991  | 10.69375333 | 0.042014    | 254.5283318 |
| 4 | A19 | 29309 | CG30336  | 7.792610667 | 0.044221667 | 176.2170279 |
| 4 | A20 | 28646 | CG14496  | 11.01394    | 0.037118667 | 296.7224038 |
| 4 | A21 | 29376 | CG30437  | 11.74954    | 0.038951    | 301.6492516 |
| 4 | A22 | 28648 | CG14637  | 10.27631467 | 0.040624333 | 252.9595891 |
| 4 | A23 | 29497 | CG31135  | 12.34408667 | 0.04649     | 265.5213308 |
| 4 | A24 | 28650 | CG14719  | 11.80271333 | 0.043245667 | 272.9224508 |
| 4 | B01 |       | DIAP1    | 0.434317    | 0.012655    | 34.31979455 |
| 4 | B02 |       | ex/ft    | 37.58027333 | 0.056064    | 670.3102407 |
| 4 | B03 |       | Luc      | 1.421298667 | 0.068830667 | 20.64920675 |
| 4 | B04 |       | hpo      | 32.36387333 | 0.056296333 | 574.8842139 |
| 4 | B05 | 27891 | CG6584   | 9.571538    | 0.074351667 | 128.7333348 |
| 4 | B06 | 22809 | CG5779   | 10.49814667 | 0.057132    | 183.7524796 |
| 4 | B07 | 27882 | CG4537   | 9.506204    | 0.051498    | 184.5936541 |
| 4 | B08 | 22810 | CG5818   | 10.48928    | 0.062482    | 167.8768285 |
| 4 | B09 | 27886 | CG15178  | 11.410279   | 0.057458667 | 198.5823839 |
| 4 | B10 | 22812 | CG5861   | 10.617081   | 0.059381333 | 178.7949243 |
| 4 | B11 | 27890 | CG1495   | 11.05794333 | 0.050577333 | 218.6343685 |

|   |     |       |               |             |             |             |
|---|-----|-------|---------------|-------------|-------------|-------------|
| 4 | B12 | 22803 | CG3308,CG5919 | 10.79615167 | 0.049914667 | 216.292172  |
| 4 | B13 | 27885 | CG33171       | 9.523644    | 0.049678    | 191.7074761 |
| 4 | B14 | 22802 | CG32156       | 10.59551    | 0.039395333 | 268.9534293 |
| 4 | B15 | 27883 | CG11106       | 11.05510667 | 0.046290667 | 238.8193444 |
| 4 | B16 | 22832 | CG5735        | 12.09436    | 0.046683667 | 259.0704815 |
| 4 | B17 | 22807 | CG5649        | 13.83301667 | 0.048398667 | 285.8140031 |
| 4 | B18 | 28452 | CG12483       | 9.082099    | 0.040023667 | 226.9182151 |
| 4 | B19 | 22801 | CG4924        | 11.102267   | 0.049426    | 224.6240238 |
| 4 | B20 | 28459 | CG12636       | 10.72363433 | 0.040944333 | 261.9076551 |
| 4 | B21 | 22808 | CG5729        | 9.113557667 | 0.054121    | 168.392263  |
| 4 | B22 | 28460 | CG12807       | 10.65216933 | 0.038720333 | 275.1053107 |
| 4 | B23 | 22818 | CG4996        | 10.25832833 | 0.040005333 | 256.4240185 |
| 4 | B24 | 28457 | CG12567       | 12.11672333 | 0.043735333 | 277.0465527 |
| 4 | C01 | 29317 | CG30193       | 10.21318    | 0.049781333 | 205.1608367 |
| 4 | C02 | 28644 | CG14325       | 12.89286333 | 0.058154333 | 221.7008191 |
| 4 | C03 | 29311 | CG30362       | 12.384021   | 0.050803333 | 243.7639459 |
| 4 | C04 | 28645 | CG14468       | 10.88131167 | 0.053859333 | 202.0320526 |
| 4 | C05 | 29319 | CG30287       | 12.20580733 | 0.050449333 | 241.9418955 |
| 4 | C06 | 28652 | CG14250       | 11.20717933 | 0.049010333 | 228.6697227 |
| 4 | C07 | 29322 | CG30353       | 11.40223333 | 0.051231333 | 222.5636655 |
| 4 | C08 | 28659 | CG14566       | 11.65178667 | 0.052466667 | 222.0797967 |
| 4 | C09 | 29324 | CG30374       | 11.41528367 | 0.043264667 | 263.8477202 |
| 4 | C10 | 28661 | CG14675       | 10.76113133 | 0.041140333 | 261.5713209 |
| 4 | C11 | 29314 | CG30391       | 11.84262333 | 0.043634    | 271.4081527 |
| 4 | C12 | 28663 | CG14834       | 10.09035233 | 0.040141333 | 251.3706321 |
| 4 | C13 | 29318 | CG30271       | 11.92994    | 0.034912333 | 341.7113341 |
| 4 | C14 | 28653 | CG14884       | 7.212822333 | 0.044621333 | 161.6451548 |
| 4 | C15 | 29320 | CG30323       | 12.10238633 | 0.043135667 | 280.5656495 |
| 4 | C16 | 28654 | CG14944       | 11.00732567 | 0.042596667 | 258.4081462 |
| 4 | C17 | 29340 | CG30432       | 12.77075333 | 0.043445    | 293.9522001 |
| 4 | C18 | 28655 | CG14996       | 10.19566533 | 0.036207    | 281.5937618 |
| 4 | C19 | 29321 | CG30338       | 13.39432    | 0.041561    | 322.2809846 |
| 4 | C20 | 28658 | CG14517       | 11.18214    | 0.042125    | 265.4513947 |
| 4 | C21 | 29493 | CG31117       | 12.46120667 | 0.032706    | 381.006747  |
| 4 | C22 | 28660 | CG14638       | 11.50857333 | 0.037571333 | 306.3126142 |
| 4 | C23 | 29509 | CG31141       | 11.80826567 | 0.040222    | 293.5772877 |
| 4 | C24 | 28662 | CG14721       | 11.662147   | 0.042119333 | 276.883466  |
| 4 | D01 | 27896 | CG15203       | 15.09891333 | 0.061222667 | 246.6229283 |
| 4 | D02 | 22804 | CG5962        | 10.34942333 | 0.053129667 | 194.7955631 |
| 4 | D03 | 27901 | CG18539       | 10.54248167 | 0.051994    | 202.7634278 |
| 4 | D04 | 22811 | CG5841        | 11.58299167 | 0.059403    | 194.9900117 |
| 4 | D05 | 27903 | CG6884        | 5.125157667 | 0.036921333 | 138.8129085 |
| 4 | D06 | 22821 | CG5786        | 9.758189667 | 0.058775333 | 166.0252544 |
| 4 | D07 | 27894 | CG5925        | 10.53892667 | 0.052469667 | 200.8575113 |
| 4 | D08 | 22822 | CG31919       | 11.89094667 | 0.04952     | 240.1241249 |
| 4 | D09 | 27898 | CG32696       | 12.25248667 | 0.056137667 | 218.2578542 |
| 4 | D10 | 22824 | CG5862        | 10.96051033 | 0.050297    | 217.9157869 |
| 4 | D11 | 27965 | CG14759       | 12.38188333 | 0.048339667 | 256.1433329 |
| 4 | D12 | 22815 | CG5924        | 10.72934067 | 0.049520667 | 216.6638979 |
| 4 | D13 | 27897 | CG14850       | 13.07263333 | 0.054842667 | 238.366114  |
| 4 | D14 | 22814 | CG5892        | 12.76736333 | 0.049205    | 259.4728855 |
| 4 | D15 | 27895 | CG12206       | 13.21562333 | 0.053413667 | 247.4202607 |
| 4 | D16 | 22844 | CG5741        | 11.01530933 | 0.050960333 | 216.1545777 |
| 4 | D17 | 22819 | CG5659        | 14.22869    | 0.047521667 | 299.4147933 |

|   |     |       |         |             |             |             |
|---|-----|-------|---------|-------------|-------------|-------------|
| 4 | D18 | 28464 | CG12489 | 9.831525333 | 0.039381333 | 249.649377  |
| 4 | D19 | 22813 | CG4935  | 12.09203    | 0.048356333 | 250.0609365 |
| 4 | D20 | 28471 | CG1268  | 13.19527333 | 0.038403667 | 343.5941013 |
| 4 | D21 | 22820 | CG5733  | 5.312842667 | 0.047653667 | 111.4886438 |
| 4 | D22 | 28515 | CG12558 | 11.439995   | 0.045723333 | 250.2003718 |
| 4 | D23 | 22830 | CG4999  | 11.52484    | 0.035720667 | 322.6378754 |
| 4 | D24 | 28526 | CG12559 | 6.734129667 | 0.035566333 | 189.3400032 |
| 4 | E01 | 29329 | CG30197 | 15.39635    | 0.048953    | 314.5129001 |
| 4 | E02 | 28710 | CG14766 | 15.37539333 | 0.051729667 | 297.2258343 |
| 4 | E03 | 29323 | CG30363 | 13.91253    | 0.053133667 | 261.8402018 |
| 4 | E04 | NA    | NA      | 15.13407333 | 0.060759    | 249.0836474 |
| 4 | E05 | 29331 | CG30288 | 13.19196667 | 0.053602333 | 246.1080674 |
| 4 | E06 | NA    | NA      | 13.45892333 | 0.051151    | 263.1214118 |
| 4 | E07 | 29334 | CG30354 | 13.82791    | 0.057963333 | 238.5630571 |
| 4 | E08 | 28671 | CG14589 | 17.26909333 | 0.054569667 | 316.4595716 |
| 4 | E09 | 29336 | CG30378 | 15.77189433 | 0.055266333 | 285.3797852 |
| 4 | E10 | 28673 | CG14684 | 15.32961333 | 0.056416333 | 271.7229644 |
| 4 | E11 | 29326 | CG30392 | 14.59836    | 0.047815667 | 305.3049558 |
| 4 | E12 | 28675 | CG14835 | 13.36384667 | 0.046160333 | 289.509319  |
| 4 | E13 | 29330 | CG30274 | 16.31273    | 0.045125667 | 361.4956012 |
| 4 | E14 | 28665 | CG14885 | 17.05304667 | 0.045292667 | 376.5078968 |
| 4 | E15 | 29332 | CG30325 | 15.16446    | 0.044463    | 341.0579583 |
| 4 | E16 | 28666 | CG14963 | 15.87305667 | 0.040477    | 392.1500276 |
| 4 | E17 | 29327 | CG30415 | 11.81936    | 0.039231667 | 301.2709121 |
| 4 | E18 | 28667 | CG15013 | 11.95482767 | 0.036839333 | 324.5125952 |
| 4 | E19 | 29333 | CG30339 | 13.80864333 | 0.045181333 | 305.6271764 |
| 4 | E20 | 28729 | CG14494 | 12.34681    | 0.040533    | 304.6113044 |
| 4 | E21 | 29505 | CG31118 | 13.68646667 | 0.040171333 | 340.702325  |
| 4 | E22 | 28672 | CG14646 | 11.49804133 | 0.042858333 | 268.2801789 |
| 4 | E23 | 29521 | CG31142 | 10.79081733 | 0.042941667 | 251.2901378 |
| 4 | E24 | 28674 | CG14723 | 10.51325733 | 0.037661667 | 279.1500819 |
| 4 | F01 | 27908 | CG33175 | 12.78886    | 0.074555333 | 171.5351462 |
| 4 | F02 | 22816 | CG5965  | 10.02363933 | 0.052911333 | 189.4421989 |
| 4 | F03 | 27913 | CG32043 | 13.0217     | 0.056109    | 232.0786327 |
| 4 | F04 | 22823 | CG31177 | 14.37342333 | 0.061914333 | 232.1501752 |
| 4 | F05 | 27915 | CG6955  | 12.37468733 | 0.058966    | 209.8614004 |
| 4 | F06 | 22833 | CG5793  | 11.47601667 | 0.048693667 | 235.6778089 |
| 4 | F07 | 27906 | CG6738  | 11.35275633 | 0.062036    | 183.0027135 |
| 4 | F08 | 22834 | CG5823  | 11.4648     | 0.04638     | 247.1927555 |
| 4 | F09 | 27910 | CG2096  | 13.33715667 | 0.046305333 | 288.0263613 |
| 4 | F10 | 22836 | CG5871  | 13.49562333 | 0.048553    | 277.9565286 |
| 4 | F11 | 27914 | CG3922  | 1.073029667 | 0.030011    | 35.75454556 |
| 4 | F12 | 22827 | CG5931  | 4.702962667 | 0.040636667 | 115.731999  |
| 4 | F13 | 27909 | CG31114 | 13.44956333 | 0.043079333 | 312.2045374 |
| 4 | F14 | 22826 | CG5905  | 11.180844   | 0.041033    | 272.4841956 |
| 4 | F15 | 27907 | CG12565 | 14.23998333 | 0.041222    | 345.4462019 |
| 4 | F16 | 22856 | CG5745  | 16.17879    | 0.049923667 | 324.0705477 |
| 4 | F17 | 22831 | CG5660  | 13.48617    | 0.038610333 | 349.2891368 |
| 4 | F18 | 28476 | CG12493 | 12.19357067 | 0.048014333 | 253.9568879 |
| 4 | F19 | 22825 | CG4936  | 9.527684    | 0.048168667 | 197.7983752 |
| 4 | F20 | 28483 | CG12713 | 10.497993   | 0.047260333 | 222.1311671 |
| 4 | F21 | 22805 | CG32921 | 13.28675    | 0.046573333 | 285.2866447 |
| 4 | F22 | 28484 | CG12840 | 13.72461333 | 0.038751333 | 354.1713834 |
| 4 | F23 | 22842 | CG5621  | 15.11445667 | 0.040001    | 377.8519704 |



|   |     |       |               |             |             |             |
|---|-----|-------|---------------|-------------|-------------|-------------|
| 4 | F24 | 28481 | CG1257        | 12.16587    | 0.037138    | 327.5854919 |
| 4 | G01 | 29341 | CG30203       | 14.91772333 | 0.057466333 | 259.5906589 |
| 4 | G02 | 28668 | CG14359       | 9.737826    | 0.066532    | 146.3630433 |
| 4 | G03 | 29335 | CG30366       | 13.38362333 | 0.057669667 | 232.0738805 |
| 4 | G04 | 28669 | CG14470       | 11.69526333 | 0.045933    | 254.6157084 |
| 4 | G05 | 29343 | CG30289       | 10.505475   | 0.061959333 | 169.5543582 |
| 4 | G06 | 28676 | CG14264       | 12.93264333 | 0.054574667 | 236.9715497 |
| 4 | G07 | 29346 | CG30355       | 12.96980333 | 0.055773667 | 232.5434942 |
| 4 | G08 | 28683 | CG14590       | 12.93326333 | 0.053742333 | 240.6531784 |
| 4 | G09 | 29348 | CG30379       | 13.94319667 | 0.059546667 | 234.1557882 |
| 4 | G10 | 28685 | CG14686       | 12.60238333 | 0.052289667 | 241.0109709 |
| 4 | G11 | 29338 | CG30395       | 12.06240967 | 0.054606    | 220.8989794 |
| 4 | G12 | 28687 | CG14840       | 13.35090333 | 0.052911333 | 252.3259667 |
| 4 | G13 | 29342 | CG30278       | 11.95131    | 0.051303667 | 232.9523556 |
| 4 | G14 | 28677 | CG14909       | 13.16391    | 0.048363667 | 272.1859385 |
| 4 | G15 | 29344 | CG30327       | 11.74608667 | 0.048113    | 244.1354035 |
| 4 | G16 | 28678 | CG14968       | 12.67678333 | 0.041627667 | 304.5278381 |
| 4 | G17 | 29339 | CG30416       | 12.88251667 | 0.038377667 | 335.6774339 |
| 4 | G18 | 28679 | CG15015       | 11.34349367 | 0.041815    | 271.278098  |
| 4 | G19 | 29345 | CG30340       | 16.88877667 | 0.042985667 | 392.8932125 |
| 4 | G20 | 28682 | CG14519       | 12.23714    | 0.040019    | 305.783253  |
| 4 | G21 | 29517 | CG31125       | 12.45257667 | 0.047534    | 261.971992  |
| 4 | G22 | 28732 | CG14659       | 12.37587333 | 0.039762    | 311.2487635 |
| 4 | G23 | 29533 | CG31151       | 16.45701333 | 0.047174    | 348.8577041 |
| 4 | G24 | 28734 | CG14826       | 11.39175333 | 0.038375    | 296.8535071 |
| 4 | H01 | 27920 | CG15418       | 9.503348333 | 0.070126333 | 135.5175422 |
| 4 | H02 | 22828 | CG5966        | 10.66768867 | 0.067961667 | 156.9662604 |
| 4 | H03 | 27940 | CG32505       | 10.32177667 | 0.083048333 | 124.2863794 |
| 4 | H04 | 22835 | CG5849        | 10.09762967 | 0.057776333 | 174.7710366 |
| 4 | H05 | 27927 | CG7340        | 8.945517333 | 0.053491667 | 167.2319801 |
| 4 | H06 | 22845 | CG5794        | 10.620546   | 0.055603333 | 191.0055632 |
| 4 | H07 | 27918 | CG33110       | 9.666854667 | 0.057025667 | 169.517609  |
| 4 | H08 | 22846 | CG5824        | 5.489673333 | 0.056471    | 97.21225644 |
| 4 | H09 | 27922 | CG15364       | 10.53558267 | 0.050996667 | 206.5935551 |
| 4 | H10 | 22848 | CG5877        | 10.249166   | 0.051413333 | 199.3484051 |
| 4 | H11 | 27926 | CG4412        | 4.866218333 | 0.043593    | 111.6284342 |
| 4 | H12 | 22839 | CG5410,CG5933 | 10.217435   | 0.052579333 | 194.3241641 |
| 4 | H13 | 27887 | CG15470       | 8.360914333 | 0.055698667 | 150.1097752 |
| 4 | H14 | 22838 | CG5896        | 10.65592033 | 0.055303    | 192.6825006 |
| 4 | H15 | 27924 | CG17648       | 9.494027667 | 0.046147667 | 205.7314779 |
| 4 | H16 | 22868 | CG5757        | 8.700337667 | 0.059271667 | 146.7874645 |
| 4 | H17 | 22843 | CG5670        | 10.68799    | 0.042212333 | 253.1959064 |
| 4 | H18 | 28488 | CG40306       | 12.18567667 | 0.039212333 | 310.7613251 |
| 4 | H19 | 22837 | CG4942        | 11.61617067 | 0.042956333 | 270.4181145 |
| 4 | H20 | 28494 | CG12754       | 11.31061667 | 0.045906    | 246.3864564 |
| 4 | H21 | 22817 | CG4963        | 10.96740267 | 0.041842    | 262.1146854 |
| 4 | H22 | 28495 | CG12843       | 10.85311733 | 0.039503333 | 274.7392794 |
| 4 | H23 | 22854 | CG5626        | 11.60728333 | 0.045423667 | 255.533826  |
| 4 | H24 | 28482 | CG12590       | 10.70233567 | 0.041140333 | 260.1421719 |
| 4 | I01 | 29353 | CG30264       | 12.92451667 | 0.057664333 | 224.1336355 |
| 4 | I02 | 28722 | CG14768       | 13.85208667 | 0.052571667 | 263.4895856 |
| 4 | I03 | 29304 | CG30429       | 11.10993333 | 0.055654333 | 199.6238688 |
| 4 | I04 | 28681 | CG14471       | 13.50482667 | 0.054063333 | 249.7964116 |
| 4 | I05 | 29355 | CG30290       | 11.67611667 | 0.056564333 | 206.4218913 |

|   |     |       |                |             |             |             |
|---|-----|-------|----------------|-------------|-------------|-------------|
| 4 | I06 | 28688 | CG14283        | 12.89107333 | 0.053872    | 239.290788  |
| 4 | I07 | 29358 | CG30356        | 13.92158333 | 0.050667667 | 274.7626692 |
| 4 | I08 | 28695 | CG14591        | 11.99118    | 0.055642    | 215.5059128 |
| 4 | I09 | 29360 | CG30380        | 13.61675333 | 0.049931    | 272.7114084 |
| 4 | I10 | 28697 | CG14693        | 13.60109667 | 0.045737667 | 297.3718962 |
| 4 | I11 | 29350 | CG30398        | 12.16917367 | 0.047245    | 257.5759057 |
| 4 | I12 | 28699 | CG14847        | 8.387188333 | 0.057879333 | 144.908171  |
| 4 | I13 | 29354 | CG30280        | 12.05800667 | 0.050026667 | 241.0315832 |
| 4 | I14 | 28689 | CG14910        | 12.671094   | 0.054472333 | 232.6152236 |
| 4 | I15 | 29356 | CG30329        | 12.39126267 | 0.050024667 | 247.7030532 |
| 4 | I16 | 28690 | CG14977        | 9.697672333 | 0.048313    | 200.7259399 |
| 4 | I17 | 29351 | CG30421        | 11.13143067 | 0.039169667 | 284.1849731 |
| 4 | I18 | 28691 | CG15017        | 9.602614667 | 0.046959    | 204.4893347 |
| 4 | I19 | 29357 | CG30342        | 8.900951    | 0.05379     | 165.4759435 |
| 4 | I20 | 28694 | CG33203        | 11.14107367 | 0.048337667 | 230.4843083 |
| 4 | I21 | 29529 | CG31126        | 13.80169333 | 0.052062667 | 265.0977028 |
| 4 | I22 | 28696 | CG14652        | 10.56735933 | 0.040619667 | 260.1537679 |
| 4 | I23 | 29545 | CG31152        | 11.17060467 | 0.046232667 | 241.6171394 |
| 4 | I24 | 28698 | CG14745        | 10.00542967 | 0.045150333 | 221.6025648 |
| 4 | J01 | 27932 | CG32647        | 8.982020667 | 0.083949333 | 106.9933531 |
| 4 | J02 | 22840 | CG5976         | 8.882423    | 0.073439333 | 120.9491235 |
| 4 | J03 | 27937 | CG2151,CG32715 | 5.946554333 | 0.086193667 | 68.99061803 |
| 4 | J04 | 22892 | CG5772         | 10.11073733 | 0.068570667 | 147.4498911 |
| 4 | J05 | 27939 | CG7933         | 11.00032333 | 0.060797667 | 180.9333143 |
| 4 | J06 | 22857 | CG5798         | 6.968146    | 0.061053333 | 114.132114  |
| 4 | J07 | 27930 | CG8881         | 8.903931    | 0.06379     | 139.5819251 |
| 4 | J08 | 22858 | CG5826         | 9.945516667 | 0.059922    | 165.9743778 |
| 4 | J09 | 27888 | CG17105        | 10.24138233 | 0.060404    | 169.5480818 |
| 4 | J10 | 22860 | CG5880         | 7.637858    | 0.046663333 | 163.6800771 |
| 4 | J11 | 27938 | CG5163         | 6.690832667 | 0.031212    | 214.367316  |
| 4 | J12 | 22851 | CG5946         | 9.042701    | 0.058413333 | 154.8054268 |
| 4 | J13 | 27899 | CG15709        | 10.31147367 | 0.051687    | 199.4983974 |
| 4 | J14 | 22850 | CG5899         | 9.927469    | 0.050353    | 197.1574484 |
| 4 | J15 | 27931 | CG13000        | 9.139307    | 0.044577    | 205.0229266 |
| 4 | J16 | 28456 | CG12537        | 11.12848133 | 0.048158667 | 231.0795149 |
| 4 | J17 | 22855 | CG5682         | 9.574815333 | 0.045484667 | 210.5064417 |
| 4 | J18 | 28499 | CG12502        | 11.82935333 | 0.045877667 | 257.8455748 |
| 4 | J19 | 22849 | CG4947         | 10.280351   | 0.048344    | 212.6499876 |
| 4 | J20 | 28506 | CG12765        | 11.110183   | 0.054883667 | 202.4315006 |
| 4 | J21 | 22889 | CG4988         | 9.748196333 | 0.055742667 | 174.8785431 |
| 4 | J22 | 28507 | CG12848        | 10.47490167 | 0.039489667 | 265.256776  |
| 4 | J23 | 22866 | CG5641         | 9.500929333 | 0.043057667 | 220.6559265 |
| 4 | J24 | 28504 | CG40444        | 10.65293767 | 0.041575333 | 256.2321649 |
| 4 | K02 | 28692 | CG1442         | 12.42491467 | 0.063069333 | 197.004059  |
| 4 | K03 | 29359 | CG33087        | 14.60189667 | 0.05941     | 245.7817988 |
| 4 | K04 | 28728 | CG14459        | 10.357897   | 0.051204    | 202.2868721 |
| 4 | K05 | 29367 | CG30291        | 10.20540267 | 0.042310333 | 241.2035515 |
| 4 | K06 | 28700 | CG14291        | 12.291212   | 0.05687     | 216.1282223 |
| 4 | K07 | 29370 | CG30357        | 9.362504333 | 0.060957333 | 153.5911074 |
| 4 | K08 | 28707 | CG33131        | 14.89680667 | 0.059351667 | 250.9922215 |
| 4 | K09 | 29372 | CG30381        | 12.63133333 | 0.057152    | 221.0129713 |
| 4 | K1  | 29365 | CG30265        | 13.51915667 | 0.059387333 | 227.6437736 |
| 4 | K10 | 28709 | CG14704        | 15.36330333 | 0.053938333 | 284.8308871 |
| 4 | K11 | 29362 | CG30403        | 13.19677333 | 0.051137333 | 258.0653404 |

|   |     |       |         |             |             |             |
|---|-----|-------|---------|-------------|-------------|-------------|
| 4 | K12 | 28711 | CG14852 | 11.065509   | 0.058889    | 187.9045153 |
| 4 | K13 | 29366 | CG30282 | 14.39370333 | 0.059290667 | 242.7650783 |
| 4 | K14 | 28701 | CG14928 | 13.423968   | 0.057081    | 235.1740159 |
| 4 | K15 | 29368 | CG30332 | 12.36809    | 0.059361667 | 208.3514614 |
| 4 | K16 | 28702 | CG14979 | 10.99565    | 0.051523667 | 213.4096952 |
| 4 | K17 | 29363 | CG30422 | 11.561166   | 0.055306667 | 209.0374759 |
| 4 | K18 | 28703 | CG15021 | 12.71160233 | 0.057653667 | 220.4821145 |
| 4 | K19 | 29364 | CG30436 | 15.88566333 | 0.055011    | 288.7724879 |
| 4 | K20 | 28706 | CG14536 | 10.60808333 | 0.057227    | 185.3685032 |
| 4 | K21 | 29541 | CG31127 | 13.11670667 | 0.055299    | 237.1960916 |
| 4 | K22 | 28708 | CG14657 | 11.44012467 | 0.048659    | 235.1080924 |
| 4 | K23 | 29565 | CG31133 | 11.53013467 | 0.056025    | 205.8033854 |
| 4 | K24 | 27905 | CG14500 | 10.81829667 | 0.053631333 | 201.7159745 |
| 4 | L01 | 27944 | CG16995 | 14.99875333 | 0.077131333 | 194.4573325 |
| 4 | L02 | 22852 | CG5987  | 12.71561667 | 0.070443    | 180.5093007 |
| 4 | L03 | 27949 | CG4038  | 9.738739    | 0.076470667 | 127.3526102 |
| 4 | L04 | 22859 | CG5853  | 12.97578667 | 0.065625    | 197.726273  |
| 4 | L05 | 27951 | CG8050  | 10.976188   | 0.066045667 | 166.1908881 |
| 4 | L06 | 22869 | CG5800  | 10.317257   | 0.066289333 | 155.6397761 |
| 4 | L07 | 27959 | CG16873 | 12.44259567 | 0.054683333 | 227.5390856 |
| 4 | L08 | 22870 | CG5838  | 5.684397333 | 0.075984    | 74.81045132 |
| 4 | L09 | 27946 | CG15367 | 13.46055333 | 0.065766333 | 204.6724008 |
| 4 | L10 | 22872 | CG5885  | 8.098499667 | 0.069692    | 116.2041506 |
| 4 | L11 | 27950 | CG5338  | 3.192969333 | 0.050191667 | 63.61552715 |
| 4 | L12 | 22863 | CG33162 | 11.22872667 | 0.060755333 | 184.8187813 |
| 4 | L13 | 27971 | CG16996 | 12.42236333 | 0.056641333 | 219.3162237 |
| 4 | L14 | 22888 | CG6017  | 11.410486   | 0.069144333 | 165.0241668 |
| 4 | L15 | 27943 | CG13748 | 11.303158   | 0.053011333 | 213.2215375 |
| 4 | L16 | 28468 | CG12538 | 9.137436    | 0.055305    | 165.2189856 |
| 4 | L17 | 22867 | CG5684  | 8.688235333 | 0.069220667 | 125.5150485 |
| 4 | L18 | 28511 | CG12508 | 8.361188    | 0.047987    | 174.2386063 |
| 4 | L19 | 22877 | CG4980  | 10.86965833 | 0.061249667 | 177.4647753 |
| 4 | L20 | 28517 | CG12775 | 1.194747333 | 0.035051667 | 34.08532167 |
| 4 | L21 | 22841 | CG4972  | 9.753913    | 0.047265667 | 206.3635973 |
| 4 | L22 | 28518 | CG12853 | 10.10278767 | 0.051383333 | 196.6160428 |
| 4 | L23 | 22878 | CG5645  | 10.42162567 | 0.051134667 | 203.8074431 |
| 4 | L24 | 28538 | CG12560 | 12.043563   | 0.043647333 | 275.9289533 |
| 4 | M01 | 29377 | CG30267 | 13.16828    | 0.056769667 | 231.9597907 |
| 4 | M02 | 28704 | CG14453 | 9.196568333 | 0.052193667 | 176.2008481 |
| 4 | M03 | 29371 | CG30369 | 9.456303    | 0.051520333 | 183.5450663 |
| 4 | M04 | 28705 | CG14483 | 9.565246    | 0.053274667 | 179.5458629 |
| 4 | M05 | 29379 | CG30293 | 9.958965    | 0.052719    | 188.9065612 |
| 4 | M06 | 28712 | CG14298 | 9.176132    | 0.054683333 | 167.8049131 |
| 4 | M07 | 29382 | CG30358 | 10.17418633 | 0.051915667 | 195.9752612 |
| 4 | M08 | 28719 | CG14593 | 12.993354   | 0.055177333 | 235.483544  |
| 4 | M09 | 29384 | CG30384 | 10.07479267 | 0.054406    | 185.1779706 |
| 4 | M10 | 28721 | CG14713 | 8.627820667 | 0.052062667 | 165.7199145 |
| 4 | M11 | 29374 | CG30409 | 10.82229233 | 0.047374667 | 228.4404956 |
| 4 | M12 | 28723 | CG14865 | 10.49573    | 0.056590667 | 185.4675094 |
| 4 | M13 | 29378 | CG30283 | 10.97218333 | 0.055856    | 196.4369689 |
| 4 | M14 | 28713 | CG32953 | 9.431995333 | 0.040898    | 230.6224102 |
| 4 | M15 | 29380 | CG30334 | 11.13884833 | 0.051450667 | 216.4957046 |
| 4 | M16 | 28714 | CG14980 | 11.881264   | 0.050588667 | 234.8601927 |
| 4 | M17 | 29375 | CG30424 | 10.14672833 | 0.046567333 | 217.8936952 |

|   |     |       |          |             |             |             |
|---|-----|-------|----------|-------------|-------------|-------------|
| 4 | M18 | 28715 | CG15024  | 9.398380667 | 0.045137667 | 208.2159172 |
| 4 | M19 | 29381 | CG30345  | 8.466286    | 0.045492    | 186.1049415 |
| 4 | M20 | 28718 | CG14545  | 9.602797333 | 0.040898333 | 234.7967888 |
| 4 | M21 | 29553 | CG31128  | 9.775793    | 0.036638333 | 266.8187145 |
| 4 | M22 | 28720 | CG14658  | 10.135098   | 0.036841    | 275.1037703 |
| 4 | M23 | 29577 | CG31134  | 7.364203667 | 0.036109667 | 203.9399514 |
| 4 | M24 | 27917 | CG14509  | 10.554111   | 0.044917    | 234.9691876 |
| 4 | N01 | 27956 | CG1288   | 11.02767233 | 0.070410333 | 156.6200842 |
| 4 | N02 | 22880 | CG5765   | 11.34553433 | 0.065228667 | 173.9347884 |
| 4 | N03 | 27961 | CG4760   | 8.64726     | 0.102765333 | 84.14569115 |
| 4 | N04 | 22871 | CG5855   | 9.440936    | 0.064681333 | 145.9607512 |
| 4 | N05 | 27953 | CG14673  | 12.52225667 | 0.063171333 | 198.2268856 |
| 4 | N06 | 22881 | CG5802   | 7.949471667 | 0.062546    | 127.0980025 |
| 4 | N07 | 27954 | CG9662   | 8.294342333 | 0.058284667 | 142.3074508 |
| 4 | N08 | 22882 | CG31343  | 10.01169133 | 0.049234333 | 203.3477587 |
| 4 | N09 | 27958 | CG15449  | 10.313753   | 0.058767667 | 175.5004679 |
| 4 | N10 | 22884 | CG5888   | 9.053816667 | 0.053488    | 169.2681848 |
| 4 | N11 | 27929 | CG14610  | 8.890807333 | 0.044741    | 198.7172243 |
| 4 | N12 | 22875 | CG5955   | 11.503983   | 0.052766333 | 218.0174796 |
| 4 | N13 | 27957 | CG15083  | 8.970698    | 0.049556333 | 181.0202127 |
| 4 | N14 | 22874 | CG5903   | 8.831308333 | 0.050207667 | 175.8956136 |
| 4 | N15 | 27955 | CG13859  | 8.408701667 | 0.051371667 | 163.6836453 |
| 4 | N16 | 28528 | CG1263   | 1.145322    | 0.041579667 | 27.54524247 |
| 4 | N17 | 22879 | CG5692   | 12.23045033 | 0.049030667 | 249.444912  |
| 4 | N18 | 28522 | CG12509  | 7.703189    | 0.047275    | 162.9442411 |
| 4 | N19 | 22873 | CG4949   | 9.369405    | 0.051545667 | 181.7690139 |
| 4 | N20 | 28529 | CG12792  | 2.624712    | 0.039946333 | 65.70595549 |
| 4 | N21 | 22853 | CG4975   | 10.482689   | 0.041344667 | 253.5439234 |
| 4 | N22 | 28530 | CG12854  | 9.636790333 | 0.050077333 | 192.438169  |
| 4 | N23 | 22890 | CG5646   | 9.780016667 | 0.047060333 | 207.8186867 |
| 4 | N24 | 28516 | CG12617  | 8.794092333 | 0.039554    | 222.3313024 |
| 4 | O01 | 29389 | CG30268  | 13.33574667 | 0.053886333 | 247.4792    |
| 4 | O02 | 28716 | CG14454  | 11.10131667 | 0.055786667 | 198.9958772 |
| 4 | O03 | 29383 | CG30371  | 12.70595333 | 0.055524    | 228.8371395 |
| 4 | O04 | 28717 | CG14488  | 9.223522667 | 0.047414    | 194.5316292 |
| 4 | O05 | 29391 | CG30320  | 8.839338667 | 0.049498333 | 178.5785111 |
| 4 | O06 | 28724 | CG14303  | 11.63697033 | 0.054104    | 215.0852124 |
| 4 | O07 | 29394 | CG30360  | 12.14105467 | 0.053035    | 228.925326  |
| 4 | O08 | 28731 | CG14636  | 11.05444233 | 0.054130667 | 204.2177386 |
| 4 | O09 | 29396 | CG30385  | 13.29246333 | 0.053021667 | 250.6987081 |
| 4 | O10 | 28733 | CG14717  | 12.44772667 | 0.048339667 | 257.5054303 |
| 4 | O11 | 29386 | CG30411  | 13.304392   | 0.043951667 | 302.7050624 |
| 4 | O12 | 28735 | CG14867  | 12.54925033 | 0.056035    | 223.9537848 |
| 4 | O13 | 29316 | CG30430  | 13.01178    | 0.049385    | 263.4763592 |
| 4 | O14 | 28725 | CG14935  | 12.06613    | 0.037734    | 319.7681136 |
| 4 | O15 | 29328 | CG30431  | 13.25752    | 0.040444667 | 327.7940231 |
| 4 | O16 | 28726 | CG14989  | 11.76588    | 0.038631667 | 304.5656845 |
| 4 | O17 | 29387 | CG30428  | 12.46804667 | 0.044582667 | 279.6613033 |
| 4 | O18 | 28727 | CG1506   | 11.94985333 | 0.043728667 | 273.2727578 |
| 4 | O19 | 29395 | CG30372  | 13.49054    | 0.039038    | 345.5745684 |
| 4 | O20 | 28730 | CG14547  | 12.20442333 | 0.040713    | 299.7672324 |
| 4 | O21 |       | wt       | 56.11517333 | 0.038515333 | 1456.95671  |
| 4 | O22 |       | HFA17794 | 1.301166333 | 0.014001667 | 92.92938936 |
| 4 | O23 |       | hpo      | 39.9511     | 0.032981333 | 1211.324588 |

|   |     |       |          |             |             |             |
|---|-----|-------|----------|-------------|-------------|-------------|
| 4 | O24 |       | Luc      | 1.902852667 | 0.040289667 | 47.22929783 |
| 4 | P01 | 27968 | CG1638   | 13.46526167 | 0.079061    | 170.3148413 |
| 4 | P02 | 22876 | CG6015   | 3.689887667 | 0.120806667 | 30.54374207 |
| 4 | P03 | 27973 | CG1403   | 10.85170867 | 0.063985    | 169.5976974 |
| 4 | P04 | 22883 | CG5857   | 7.527266667 | 0.056404333 | 133.4519215 |
| 4 | P05 | 27975 | CG8534   | 11.19813333 | 0.049826667 | 224.7417715 |
| 4 | P06 | 22893 | CG5809   | 7.140646    | 0.052818667 | 135.1917125 |
| 4 | P07 | 27966 | CG11085  | 9.233821667 | 0.055244    | 167.1461456 |
| 4 | P08 | 22894 | CG5840   | 11.42391667 | 0.055484667 | 205.8932197 |
| 4 | P09 | 27970 | CG15465  | 9.900701    | 0.049463333 | 200.1624301 |
| 4 | P10 | 22896 | CG5889   | 9.108675667 | 0.049055667 | 185.6803971 |
| 4 | P11 | 27941 | CG14628  | 11.62124667 | 0.04708     | 246.8404135 |
| 4 | P12 | 22895 | CG5859   | 20.42539333 | 0.073121    | 279.3368982 |
| 4 | P13 | 27900 | CG32828  | 9.805964333 | 0.039125667 | 250.6274057 |
| 4 | P14 | 22886 | CG5904   | 9.348854667 | 0.04466     | 209.3339603 |
| 4 | P15 | 27948 | CG17770  | 9.144750333 | 0.046190667 | 197.9783145 |
| 4 | P16 | 28492 | CG12551  | 10.82333933 | 0.040071333 | 270.1018018 |
| 4 | P17 | 22865 | CG4979   | 10.66378033 | 0.046031333 | 231.6635118 |
| 4 | P18 | 28534 | CG12522  | 8.622165667 | 0.036768    | 234.5018948 |
| 4 | P19 | 22885 | CG4953   | 7.857373667 | 0.036047    | 217.9758001 |
| 4 | P20 | 28539 | CG12806  | 10.30809033 | 0.040999    | 251.4229697 |
| 4 | P21 |       | wts      | 51.59778667 | 0.035411667 | 1457.084388 |
| 4 | P22 |       | HFA17794 | 1.004786333 | 0.011595    | 86.65686359 |
| 4 | P23 |       | hpo      | 33.23287333 | 0.031245667 | 1063.599432 |
| 4 | P24 |       | Luc      | 1.833591667 | 0.042787667 | 42.85327548 |
| 5 | A01 |       | DIAP1    | 0.511082333 | 0.005922667 | 86.29260468 |
| 5 | A02 |       | ex/ft    | 49.20393333 | 0.052536333 | 936.5696121 |
| 5 | A03 |       | Luc      | 1.62639     | 0.055911333 | 29.08873574 |
| 5 | A04 |       | hpo      | 41.52448333 | 0.043153    | 962.2617972 |
| 5 | A05 | 28461 | CG12859  | 13.10255    | 0.056760667 | 230.8385502 |
| 5 | A06 | 25198 | CG15651  | 13.18500333 | 0.058063667 | 227.0783795 |
| 5 | A07 | 28463 | CG1295   | 14.75437333 | 0.070492333 | 209.3046525 |
| 5 | A08 | 25200 | CG15739  | 12.49538667 | 0.056928    | 219.4945662 |
| 5 | A09 | 28455 | CG13176  | 13.91493333 | 0.062761333 | 221.7118821 |
| 5 | A10 | 28357 | CG3800   | 9.997323667 | 0.048455    | 206.3218175 |
| 5 | A11 | 28462 | CG12904  | 13.92019    | 0.052889333 | 263.194658  |
| 5 | A12 | 28366 | CG12207  | 11.99785333 | 0.053414    | 224.6200122 |
| 5 | A13 | 25205 | CG14870  | 14.27207667 | 0.052628667 | 271.1844622 |
| 5 | A14 | 28367 | CG12251  | 14.82283333 | 0.053486    | 277.1348266 |
| 5 | A15 | 25204 | CG14798  | 20.85195    | 0.075140333 | 277.506754  |
| 5 | A16 | 28363 | CG11924  | 14.48263333 | 0.050881    | 284.6373564 |
| 5 | A17 | 25201 | CG14687  | 14.45512    | 0.047880333 | 301.9009893 |
| 5 | A18 | 28368 | CG12310  | 12.6035     | 0.041216333 | 305.7889672 |
| 5 | A19 | 25203 | CG14744  | 15.46869    | 0.054993333 | 281.283004  |
| 5 | A20 | 28361 | CG11785  | 14.24091667 | 0.047459667 | 300.0635627 |
| 5 | A21 | 25207 | CG15551  | 12.98616833 | 0.044244667 | 293.5081064 |
| 5 | A22 | 28362 | CG11877  | 14.48633    | 0.046664333 | 310.436879  |
| 5 | A23 | 25206 | CG15523  | 13.83961667 | 0.044278667 | 312.5572134 |
| 5 | A24 | 28377 | CG12110  | 13.06201633 | 0.041099667 | 317.8131939 |
| 5 | B01 |       | DIAP1    | 0.573839    | 0.011512667 | 49.84414268 |
| 5 | B02 |       | ex/ft    | 50.29213    | 0.061502667 | 817.7227546 |
| 5 | B03 |       | Luc      | 1.913920333 | 0.063193667 | 30.28658463 |
| 5 | B04 |       | hpo      | 39.74807333 | 0.057379667 | 692.720534  |
| 5 | B05 | 28419 | CG40368  | 10.98683933 | 0.062441333 | 175.954592  |

|   |     |       |                 |             |             |             |
|---|-----|-------|-----------------|-------------|-------------|-------------|
| 5 | B06 | 28261 | CG10703         | 10.30377167 | 0.058892667 | 174.9584838 |
| 5 | B07 | 23383 | CG4545          | 11.336274   | 0.062682    | 180.8537379 |
| 5 | B08 | 28265 | CG10756         | 9.247779667 | 0.04985     | 185.5121297 |
| 5 | B09 | 23384 | CG4567          | 12.19342    | 0.063915667 | 190.7735714 |
| 5 | B10 | 28266 | CG10845         | 12.59878    | 0.067779    | 185.8802874 |
| 5 | B11 | 23386 | CG4607          | 13.30688667 | 0.059416333 | 223.9600783 |
| 5 | B12 | 28269 | CG1109          | 28.7141     | 0.064013    | 448.5666974 |
| 5 | B13 | 23387 | CG4627          | 15.07532333 | 0.064369667 | 234.1991828 |
| 5 | B14 | 28271 | CG1138          | 11.775539   | 0.054191333 | 217.2956131 |
| 5 | B15 | 23385 | CG4586          | 14.43802333 | 0.055818    | 258.6624984 |
| 5 | B16 | 28272 | CG11456         | 13.45590333 | 0.051859    | 259.4709372 |
| 5 | B17 | 23388 | CG4665          | 11.30825533 | 0.044121667 | 256.2971027 |
| 5 | B18 | 28262 | CG11490         | 10.97926333 | 0.040741667 | 269.4848844 |
| 5 | B19 | 23379 | CG4743          | 13.39004667 | 0.057611667 | 232.4190124 |
| 5 | B20 | 28268 | CG11025         | 12.70906667 | 0.049877667 | 254.8047556 |
| 5 | B21 | 23393 | CG4451          | 15.28040667 | 0.048135333 | 317.446782  |
| 5 | B22 | 28270 | CG1126          | 12.04298    | 0.046401    | 259.5413892 |
| 5 | B23 | 23390 | CG4704          | 14.09723    | 0.044131    | 319.4405293 |
| 5 | B24 | 28263 | CG11601         | 13.05813667 | 0.045346    | 287.9666711 |
| 5 | C01 | 28454 | CG13121         | 9.453147333 | 0.054114333 | 174.688419  |
| 5 | C02 | 25208 | CG15618         | 10.840126   | 0.046157667 | 234.8499563 |
| 5 | C03 | 28453 | CG13039         | 14.34013    | 0.050252333 | 285.3624707 |
| 5 | C04 | 25199 | CG15710         | 10.99953567 | 0.050809333 | 216.4865182 |
| 5 | C05 | 28473 | CG12861         | 12.63291333 | 0.048114667 | 262.5584714 |
| 5 | C06 | 25210 | CG15655         | 13.31265    | 0.050538333 | 263.4168783 |
| 5 | C07 | 28475 | CG12954         | 10.43928033 | 0.045473667 | 229.5675959 |
| 5 | C08 | 25212 | CG15743         | 16.48161    | 0.047497667 | 346.9983087 |
| 5 | C09 | 28467 | CG13178         | 14.38225667 | 0.05165     | 278.4560826 |
| 5 | C10 | 28369 | CG11719         | 14.14751333 | 0.058682333 | 241.0864144 |
| 5 | C11 | 28536 | CG1317          | 12.69431333 | 0.053125    | 238.9517804 |
| 5 | C12 | 28378 | CG33183         | 9.613828667 | 0.045202667 | 212.6827768 |
| 5 | C13 | 25217 | CG14877         | 14.17368    | 0.049379333 | 287.036682  |
| 5 | C14 | 28379 | CG12261         | 13.33986667 | 0.038231333 | 348.9249656 |
| 5 | C15 | 25216 | CG14805         | 14.97353667 | 0.043290333 | 345.8863796 |
| 5 | C16 | 28376 | CG12012         | 15.54669    | 0.040167    | 387.0513108 |
| 5 | C17 | 25213 | CG14688         | 16.38159333 | 0.046249333 | 354.2017182 |
| 5 | C18 | 28380 | CG12314         | 14.88166667 | 0.037903    | 392.6250341 |
| 5 | C19 | 25215 | CG14749         | 13.81078667 | 0.042833    | 322.4333263 |
| 5 | C20 | 28373 | CG11824         | 10.67594733 | 0.041320667 | 258.3682257 |
| 5 | C21 | 25219 | CG15556         | 15.36464    | 0.038685333 | 397.1696422 |
| 5 | C22 | 28374 | CG33091         | 13.41844333 | 0.038066333 | 352.5015981 |
| 5 | C23 | 25257 | CG14672         | 13.724813   | 0.040776333 | 336.5877184 |
| 5 | C24 | 28389 | CG12134         | 14.63035333 | 0.034860333 | 419.6848376 |
| 5 | D01 | 28358 | CG12352         | 18.426943   | 0.102674333 | 179.4698091 |
| 5 | D02 | 23392 | CG4780          | 10.89107333 | 0.065063    | 167.3927322 |
| 5 | D03 | 28359 | CG12408         | 14.67484    | 0.067859667 | 216.2527569 |
| 5 | D04 | 23451 | CG4770          | 10.789414   | 0.058116333 | 185.6520083 |
| 5 | D05 | 28431 | CG40302,CG40306 | 11.42444    | 0.056387    | 202.6076933 |
| 5 | D06 | 28273 | CG10711         | 9.370266333 | 0.117780667 | 79.5569137  |
| 5 | D07 | 23395 | CG4552          | 10.89605    | 0.056788333 | 191.8712764 |
| 5 | D08 | 28277 | CG10757         | 12.67907667 | 0.045716333 | 277.3423795 |
| 5 | D09 | 23396 | CG4568          | 12.01079333 | 0.048993    | 245.1532532 |
| 5 | D10 | 28278 | CG10847         | 12.97518    | 0.040646333 | 319.221414  |
| 5 | D11 | 23425 | CG4415          | 11.78175333 | 0.044648667 | 263.8769355 |

|   |     |       |                |             |             |             |
|---|-----|-------|----------------|-------------|-------------|-------------|
| 5 | D12 | 28281 | CG11100        | 5.096458667 | 0.118787667 | 42.90393784 |
| 5 | D13 | 23399 | CG4630         | 11.978458   | 0.045981    | 260.5088624 |
| 5 | D14 | 28283 | CG11400        | 10.32240467 | 0.042637667 | 242.0959089 |
| 5 | D15 | 23397 | CG4587         | 16.27361333 | 0.043717    | 372.2490869 |
| 5 | D16 | 28284 | CG11458        | 14.55630667 | 0.041504    | 350.7205731 |
| 5 | D17 | 23400 | CG4666         | 13.82114    | 0.050581333 | 273.2458615 |
| 5 | D18 | 28274 | CG11494        | 9.897866333 | 0.033091667 | 299.1044976 |
| 5 | D19 | 23391 | CG4749         | 14.01911    | 0.037254    | 376.311537  |
| 5 | D20 | 28280 | CG1104         | 11.84271    | 0.032968333 | 359.214701  |
| 5 | D21 | 23405 | CG4459         | 10.59391867 | 0.041901667 | 252.8280975 |
| 5 | D22 | 28354 | CG11377        | 10.15603767 | 0.039115    | 259.6456006 |
| 5 | D23 | 23402 | CG4715         | 14.37946333 | 0.039994333 | 359.5375178 |
| 5 | D24 | 28347 | CG11624        | 13.18696    | 0.030758    | 428.7326874 |
| 5 | E01 | 28466 | CG13123        | 16.20147    | 0.059014    | 274.5360423 |
| 5 | E02 | 25220 | CG31933        | 15.0606     | 0.057734    | 260.8618838 |
| 5 | E03 | 28465 | CG13043        | 15.32339333 | 0.068844333 | 222.580314  |
| 5 | E04 | 25267 | CG31002        | 12.60859    | 0.056323667 | 223.859538  |
| 5 | E05 | 28485 | CG12863        | 12.32664    | 0.046577    | 264.6507933 |
| 5 | E06 | 25222 | CG15658        | 12.96594333 | 0.058017333 | 223.4839588 |
| 5 | E07 | 28487 | CG12963        | 12.63385    | 0.062322333 | 202.7178593 |
| 5 | E08 | 25283 | CG15735        | 11.74068    | 0.054663333 | 214.781633  |
| 5 | E09 | 28479 | CG13192        | 14.51167    | 0.056981667 | 254.672614  |
| 5 | E10 | 28381 | CG1172         | 10.99031333 | 0.051557333 | 213.1668305 |
| 5 | E11 | 28486 | CG12910        | 15.50631667 | 0.055548    | 279.1516646 |
| 5 | E12 | 28390 | CG12209        | 15.68179333 | 0.05498     | 285.2272341 |
| 5 | E13 | 25229 | CG14881        | 13.79255    | 0.048630333 | 283.6203056 |
| 5 | E14 | 28391 | CG12264        | 13.99325667 | 0.045170333 | 309.7886518 |
| 5 | E15 | 25228 | CG14815        | 15.21889333 | 0.053327333 | 285.386356  |
| 5 | E16 | 28388 | CG12034        | 16.34427    | 0.052783333 | 309.6483107 |
| 5 | E17 | 25225 | CG14690        | 13.89682333 | 0.050944333 | 272.7844772 |
| 5 | E18 | 28411 | CG12051        | 20.42824333 | 0.053239333 | 383.7058441 |
| 5 | E19 | 25227 | CG14760        | 16.20378667 | 0.051171333 | 316.6575036 |
| 5 | E20 | 28385 | CG11825        | 14.56684    | 0.046151667 | 315.6297714 |
| 5 | E21 | 25231 | CG1470,CG31006 | 11.95678667 | 0.047064    | 254.0537708 |
| 5 | E22 | 28447 | CG12104        | 15.35532    | 0.043155333 | 355.8151175 |
| 5 | E23 | 25230 | CG15531        | 15.22933667 | 0.043304667 | 351.6788799 |
| 5 | E24 | 28401 | CG1214         | 15.75937333 | 0.046376333 | 339.8149918 |
| 5 | F01 | 28370 | CG12358        | 15.03955667 | 0.061581667 | 244.2213321 |
| 5 | F02 | 23404 | CG4781         | 15.0024     | 0.060593667 | 247.5902322 |
| 5 | F03 | 28372 | CG12444        | 11.358996   | 0.057116    | 198.8759017 |
| 5 | F04 | 23463 | CG4772         | 16.98318333 | 0.069163    | 245.5530173 |
| 5 | F05 | 28441 | CG33134        | 13.55107    | 0.054463    | 248.8124048 |
| 5 | F06 | 28285 | CG10730        | 13.61552333 | 0.062094667 | 219.2704151 |
| 5 | F07 | 23407 | CG4554         | 9.231581333 | 0.058029333 | 159.0847388 |
| 5 | F08 | 28289 | CG10805        | 7.195124333 | 0.067344667 | 106.8402992 |
| 5 | F09 | 23408 | CG4570         | 14.71720667 | 0.055680333 | 264.3160661 |
| 5 | F10 | 28290 | CG10855        | 14.04408    | 0.048455    | 289.8375813 |
| 5 | F11 | 23410 | CG4611         | 14.98338333 | 0.043180667 | 346.9928672 |
| 5 | F12 | 28293 | CG11163        | 13.52229    | 0.050177333 | 269.4900088 |
| 5 | F13 | 23411 | CG4637         | 15.27298333 | 0.050607333 | 301.793877  |
| 5 | F14 | 28295 | CG11401        | 13.72379    | 0.050477667 | 271.8784545 |
| 5 | F15 | 23409 | CG4590         | 15.21282667 | 0.043433667 | 350.2542575 |
| 5 | F16 | 28296 | CG11459        | 16.06192667 | 0.052177    | 307.8353809 |
| 5 | F17 | 23412 | CG4670         | 14.56571667 | 0.049345    | 295.1812071 |

|   |     |       |                 |             |             |             |
|---|-----|-------|-----------------|-------------|-------------|-------------|
| 5 | F18 | 28286 | CG1152          | 14.67726333 | 0.045631    | 321.6511436 |
| 5 | F19 | 23403 | CG4751          | 21.10855    | 0.042076    | 501.6767278 |
| 5 | F20 | 28292 | CG11043         | 15.14141333 | 0.044559667 | 339.8008663 |
| 5 | F21 | 23417 | CG32041         | 14.83499333 | 0.048076    | 308.573786  |
| 5 | F22 | 28294 | CG1130          | 14.62133333 | 0.045191    | 323.5452487 |
| 5 | F23 | 23414 | CG4721          | 16.64564    | 0.040247667 | 413.580249  |
| 5 | F24 | 28287 | CG11608         | 13.78367    | 0.040122333 | 343.5410868 |
| 5 | G01 | 28478 | CG13124         | 13.28865667 | 0.059562667 | 223.1037898 |
| 5 | G02 | 25232 | CG15623         | 14.05420667 | 0.054018333 | 260.1747555 |
| 5 | G03 | 28477 | CG13047         | 12.85617    | 0.056771333 | 226.455312  |
| 5 | G04 | 25223 | CG15725         | 15.34382    | 0.048469333 | 316.5675891 |
| 5 | G05 | 28496 | CG12864         | 10.73110333 | 0.065226667 | 164.520186  |
| 5 | G06 | 25234 | CG15661         | 15.66592667 | 0.073539    | 213.0288237 |
| 5 | G07 | 28498 | CG1298          | 13.51041    | 0.052827333 | 255.7465832 |
| 5 | G08 | 25236 | CG15747         | 13.82655    | 0.062332667 | 221.8186826 |
| 5 | G09 | 28491 | CG1320          | 13.62097    | 0.055030667 | 247.5159911 |
| 5 | G10 | 28393 | CG11720         | 12.56816333 | 0.048336667 | 260.0130336 |
| 5 | G11 | 28497 | CG12919         | 19.02425    | 0.065111333 | 292.1803168 |
| 5 | G12 | 28402 | CG1221          | 15.67472    | 0.049429    | 317.1158632 |
| 5 | G13 | 25241 | CG14891         | 16.36208667 | 0.049890333 | 327.9610613 |
| 5 | G14 | 28403 | CG12274         | 15.25613333 | 0.048207333 | 316.4691402 |
| 5 | G15 | 25240 | CG14820         | 14.36819667 | 0.049413333 | 290.7757016 |
| 5 | G16 | 28399 | CG11958         | 17.38313667 | 0.043068667 | 403.6144606 |
| 5 | G17 | 25237 | CG14692         | 17.75942333 | 0.045809667 | 387.6785104 |
| 5 | G18 | 28404 | CG12325         | 10.42380367 | 0.047805    | 218.048398  |
| 5 | G19 | 25239 | CG14762         | 14.14888333 | 0.041395667 | 341.7962428 |
| 5 | G20 | 28423 | CG12055         | 14.09507333 | 0.039300333 | 358.6502235 |
| 5 | G21 | 25243 | CG31004         | 14.52602333 | 0.038985333 | 372.6022607 |
| 5 | G22 | 28398 | CG11893         | 15.43802    | 0.041693    | 370.278464  |
| 5 | G23 | 25242 | CG15533         | 15.60109    | 0.042079667 | 370.7512734 |
| 5 | G24 | 28412 | CG12147         | 15.42193667 | 0.038736    | 398.1293026 |
| 5 | H01 | 28382 | CG12370         | 17.06505667 | 0.059558333 | 286.5267665 |
| 5 | H02 | 23416 | CG4784          | 13.48397333 | 0.057615667 | 234.0331044 |
| 5 | H03 | 28384 | CG40197         | 13.61202333 | 0.059267333 | 229.671601  |
| 5 | H04 | 28267 | CG10922         | 9.921625333 | 0.051808333 | 191.50636   |
| 5 | H05 | 28442 | CG12427         | 14.2401     | 0.054364667 | 261.9366746 |
| 5 | H06 | 28297 | CG10733         | 14.63721333 | 0.065778667 | 222.5221956 |
| 5 | H07 | 23419 | CG4556          | 13.84708667 | 0.048148    | 287.5942234 |
| 5 | H08 | 28301 | CG10808         | 14.27716    | 0.053237333 | 268.1794731 |
| 5 | H09 | 23420 | CG4572          | 15.18237    | 0.048844333 | 310.831758  |
| 5 | H10 | 28302 | CG10861         | 13.1233     | 0.043566667 | 301.2234124 |
| 5 | H11 | 23422 | CG4613          | 20.49623667 | 0.053592333 | 382.4471784 |
| 5 | H12 | 28305 | CG11165,CG30378 | 15.95626333 | 0.041323333 | 386.1320481 |
| 5 | H13 | 23423 | CG4641          | 14.68785333 | 0.052107    | 281.8786983 |
| 5 | H14 | 28307 | CG1141          | 11.614091   | 0.041514333 | 279.7609902 |
| 5 | H15 | 23421 | CG4591          | 14.20517667 | 0.042193    | 336.6714068 |
| 5 | H16 | 28308 | CG1146          | 16.67156333 | 0.048338    | 344.8955963 |
| 5 | H17 | 23449 | CG4433          | 14.43178    | 0.045742    | 315.5039133 |
| 5 | H18 | 28298 | CG11529         | 13.57524667 | 0.039388    | 344.6543787 |
| 5 | H19 | 23415 | CG4752          | 14.01093333 | 0.038786667 | 361.2306635 |
| 5 | H20 | 28304 | CG11052         | 13.57074    | 0.033182    | 408.9789645 |
| 5 | H21 | 23429 | CG4463          | 15.47237667 | 0.037146    | 416.5287424 |
| 5 | H22 | 28306 | CG11308         | 15.95131667 | 0.043866    | 363.6373653 |
| 5 | H23 | 23426 | CG4722          | 16.71356333 | 0.038529    | 433.7917759 |



|   |     |       |                 |             |             |             |
|---|-----|-------|-----------------|-------------|-------------|-------------|
| 5 | H24 | 28299 | CG1161          | 14.60690667 | 0.039675333 | 368.160906  |
| 5 | I01 | 28490 | CG13130         | 16.35712    | 0.060619667 | 269.8319027 |
| 5 | I02 | 25244 | CG15624         | 13.31572    | 0.074741333 | 178.1573783 |
| 5 | I03 | 28489 | CG13061         | 17.18873333 | 0.056219    | 305.7459815 |
| 5 | I04 | 25292 | CG15643         | 13.96602667 | 0.063946    | 218.4034446 |
| 5 | I05 | 28508 | CG12866         | 16.19487333 | 0.054389667 | 297.7564366 |
| 5 | I06 | 25246 | CG15666         | 15.22718    | 0.058942667 | 258.3388377 |
| 5 | I07 | 28510 | CG12982         | 16.00813    | 0.061305667 | 261.1199073 |
| 5 | I08 | 25248 | CG15749         | 8.966729333 | 0.048139667 | 186.264882  |
| 5 | I09 | 28502 | CG13202         | 15.42831667 | 0.061818667 | 249.5737533 |
| 5 | I10 | 28405 | CG11726         | 13.66899    | 0.056141333 | 243.4746236 |
| 5 | I11 | 28509 | CG12921         | 16.32591333 | 0.051777667 | 315.3080157 |
| 5 | I12 | 28413 | CG12220         | 12.63308667 | 0.055767333 | 226.5320199 |
| 5 | I13 | 25253 | CG14892         | 18.46028    | 0.051576    | 357.9238405 |
| 5 | I14 | 28414 | CG12279         | 15.95244    | 0.058309    | 273.5845238 |
| 5 | I15 | 25252 | CG14825         | 14.24569667 | 0.057327    | 248.4989039 |
| 5 | I16 | 28410 | CG11984         | 11.2952     | 0.050391333 | 224.1496554 |
| 5 | I17 | 25262 | CG14731         | 15.42435667 | 0.046347    | 332.8016197 |
| 5 | I18 | 28415 | CG12334         | 13.27893667 | 0.041981333 | 316.3057391 |
| 5 | I19 | 25233 | CG14666,CG31543 | 14.71121667 | 0.057741333 | 254.7779176 |
| 5 | I20 | 28408 | CG11833         | 14.13673667 | 0.046911667 | 301.3479945 |
| 5 | I21 | 25214 | CG14722         | 14.82749333 | 0.053168333 | 278.8782797 |
| 5 | I22 | 28409 | CG11896         | 13.98040333 | 0.042742333 | 327.0856372 |
| 5 | I23 | 25269 | CG14680         | 17.04125333 | 0.041065667 | 414.9756893 |
| 5 | I24 | 28424 | CG12187         | 15.91858    | 0.044291667 | 359.4034995 |
| 5 | J01 | 28394 | CG12373         | 17.17946    | 0.061516667 | 279.2651314 |
| 5 | J02 | 23428 | CG4786          | 17.24531667 | 0.067752333 | 254.5346532 |
| 5 | J03 | 28395 | CG12418         | 13.22105667 | 0.071373    | 185.2389092 |
| 5 | J04 | 28327 | CG10981         | 16.51372333 | 0.059061333 | 279.6029551 |
| 5 | J05 | 23406 | CG4496          | 17.81232333 | 0.059063333 | 301.5800553 |
| 5 | J06 | 28309 | CG10746         | 14.76328667 | 0.060933    | 242.2872116 |
| 5 | J07 | 23431 | CG4557          | 14.58210333 | 0.069542667 | 209.6857085 |
| 5 | J08 | 28313 | CG10810         | 15.75578    | 0.054897667 | 287.0027263 |
| 5 | J09 | 23432 | CG4576          | 18.22567667 | 0.054296333 | 335.6704873 |
| 5 | J10 | 28314 | CG33128         | 15.01562    | 0.057613    | 260.6290247 |
| 5 | J11 | 23434 | CG4618          | 15.58234    | 0.049554    | 314.4517092 |
| 5 | J12 | 28317 | CG11208         | 14.26340333 | 0.054360333 | 262.3862375 |
| 5 | J13 | 23435 | CG4647          | 17.45171    | 0.055715    | 313.2318047 |
| 5 | J14 | 28319 | CG11422         | 14.34440333 | 0.050535333 | 283.8489901 |
| 5 | J15 | 23433 | CG4593          | 13.17659333 | 0.060514667 | 217.7421452 |
| 5 | J16 | 28320 | CG11466         | 16.39423667 | 0.055893667 | 293.3111682 |
| 5 | J17 | 23436 | CG4683          | 14.47095333 | 0.045167667 | 320.3830174 |
| 5 | J18 | 28310 | CG33160         | 15.82423667 | 0.046038667 | 343.716224  |
| 5 | J19 | 23466 | CG4539          | 9.912237333 | 0.055000333 | 180.2214047 |
| 5 | J20 | 28316 | CG11059         | 14.17173667 | 0.043587    | 325.1367763 |
| 5 | J21 | 23441 | CG4465          | 16.30123333 | 0.048521333 | 335.9601275 |
| 5 | J22 | 28318 | CG11309         | 14.80114    | 0.051725333 | 286.1487601 |
| 5 | J23 | 23438 | CG4725          | 13.61430667 | 0.037252667 | 365.4585801 |
| 5 | J24 | 28311 | CG11617         | 15.16454333 | 0.043586333 | 347.9196843 |
| 5 | K02 | 25255 | CG15561         | 16.42524    | 0.068299    | 240.4901975 |
| 5 | K03 | 28535 | CG1308          | 15.25723333 | 0.060117333 | 253.79092   |
| 5 | K04 | 25247 | CG15729         | 11.11798    | 0.071351667 | 155.8194856 |
| 5 | K05 | 28519 | CG12870         | 11.823867   | 0.070017667 | 168.8697662 |
| 5 | K06 | 25258 | CG15671         | 12.87176    | 0.064318667 | 200.1247953 |

|   |     |       |         |             |             |             |
|---|-----|-------|---------|-------------|-------------|-------------|
| 5 | K07 | 28521 | CG13018 | 7.805924667 | 0.060933333 | 128.1059847 |
| 5 | K08 | 25260 | CG15764 | 12.98162667 | 0.064353667 | 201.7231859 |
| 5 | K09 | 28514 | CG13221 | 14.99299    | 0.070184    | 213.6240454 |
| 5 | K1  | 28501 | CG13142 | 11.66611    | 0.067214667 | 173.5649461 |
| 5 | K10 | 28416 | CG11765 | 10.50264133 | 0.057313    | 183.2505947 |
| 5 | K11 | 28520 | CG12938 | 13.19611    | 0.052471333 | 251.4917987 |
| 5 | K12 | 28425 | CG12224 | 12.27226333 | 0.064041    | 191.6313507 |
| 5 | K13 | 25265 | CG14893 | 14.38464667 | 0.059301667 | 242.5673253 |
| 5 | K14 | 28426 | CG1228  | 14.58275    | 0.054716333 | 266.5154829 |
| 5 | K15 | 25221 | CG14662 | 13.01471667 | 0.053782    | 241.990195  |
| 5 | K16 | 28422 | CG11985 | 9.297162333 | 0.061338667 | 151.5709884 |
| 5 | K17 | 25261 | CG14695 | 13.11012667 | 0.051951667 | 252.3523788 |
| 5 | K18 | 28427 | CG12338 | 12.48867733 | 0.047727667 | 261.6653653 |
| 5 | K19 | 25263 | CG14780 | 16.27477667 | 0.049808333 | 326.7480676 |
| 5 | K20 | 28420 | CG11856 | 3.954323    | 0.03975     | 99.4798239  |
| 5 | K21 | 25226 | CG14724 | 11.88587333 | 0.042370667 | 280.5212726 |
| 5 | K22 | 28421 | CG11897 | 12.24126733 | 0.043322    | 282.5646861 |
| 5 | K23 | 25266 | CG31014 | 13.34660667 | 0.052826667 | 252.6490409 |
| 5 | K24 | 28436 | CG12201 | 12.04227933 | 0.043853667 | 274.6014244 |
| 5 | L01 | 28406 | CG12374 | 12.75638333 | 0.089824667 | 142.0142574 |
| 5 | L02 | 23440 | CG4790  | 14.259224   | 0.083998    | 169.7567085 |
| 5 | L03 | 28407 | CG12419 | 14.90790333 | 0.074649    | 199.7066717 |
| 5 | L04 | 28291 | CG10973 | 10.78133267 | 0.057681667 | 186.9109076 |
| 5 | L05 | 23418 | CG4500  | 11.57332467 | 0.080366667 | 144.0065284 |
| 5 | L06 | 28321 | CG1075  | 10.89146733 | 0.067329    | 161.764876  |
| 5 | L07 | 23443 | CG4562  | 13.30608367 | 0.060604    | 219.5578455 |
| 5 | L08 | 28325 | CG10837 | 10.849589   | 0.053771    | 201.773986  |
| 5 | L09 | 23444 | CG4580  | 14.11596333 | 0.060903    | 231.7777997 |
| 5 | L10 | 28326 | CG10887 | 14.3146     | 0.057090333 | 250.7359681 |
| 5 | L11 | 23446 | CG4623  | 11.15127267 | 0.054753667 | 203.6625736 |
| 5 | L12 | 28329 | CG11211 | 11.11967267 | 0.054869333 | 202.6573314 |
| 5 | L13 | 23447 | CG4653  | 12.9626     | 0.057038333 | 227.2611986 |
| 5 | L14 | 28331 | CG11438 | 7.625499    | 0.060683    | 125.6612066 |
| 5 | L15 | 23454 | CG4536  | 12.87977333 | 0.057498333 | 224.0025508 |
| 5 | L16 | 28332 | CG1147  | 13.87287667 | 0.056204667 | 246.8278435 |
| 5 | L17 | 23448 | CG4688  | 11.89909467 | 0.047445    | 250.7976534 |
| 5 | L18 | 28322 | CG1154  | 13.36803667 | 0.047867333 | 279.2726424 |
| 5 | L19 | 23439 | CG4764  | 11.43992    | 0.046506    | 245.9880446 |
| 5 | L20 | 28328 | CG1106  | 14.78261    | 0.047640333 | 310.2961076 |
| 5 | L21 | 23453 | CG4466  | 12.70798333 | 0.054472667 | 233.2910083 |
| 5 | L22 | 28330 | CG1131  | 15.25634333 | 0.043870667 | 347.7572714 |
| 5 | L23 | 23450 | CG4739  | 12.01241867 | 0.044728    | 268.5659691 |
| 5 | L24 | 28323 | CG11619 | 12.92055    | 0.048878    | 264.3428536 |
| 5 | M01 | 28540 | CG12855 | 13.10662    | 0.051495333 | 254.5205391 |
| 5 | M02 | 25268 | CG15627 | 13.17079    | 0.059025667 | 223.1366581 |
| 5 | M03 | 28512 | CG13076 | 15.71493    | 0.065091667 | 241.4276789 |
| 5 | M04 | 25259 | CG15730 | 11.98940933 | 0.059969333 | 199.9256731 |
| 5 | M05 | 28531 | CG12876 | 11.02037667 | 0.063749    | 172.8713653 |
| 5 | M06 | 25270 | CG15695 | 9.736481    | 0.05854     | 166.3218483 |
| 5 | M07 | 28533 | CG13030 | 10.389356   | 0.057344    | 181.1759905 |
| 5 | M08 | 25284 | CG15767 | 13.57383333 | 0.056028667 | 242.2658639 |
| 5 | M09 | 28525 | CG13223 | 11.47182767 | 0.061066667 | 187.85744   |
| 5 | M10 | 28428 | CG11779 | 8.488492333 | 0.060321667 | 140.7204542 |
| 5 | M11 | 28532 | CG1294  | 11.25817967 | 0.060729333 | 185.3828957 |

|   |     |       |                 |             |             |             |
|---|-----|-------|-----------------|-------------|-------------|-------------|
| 5 | M12 | 28437 | CG12229         | 13.01430667 | 0.055278667 | 235.4309076 |
| 5 | M13 | 25277 | CG15485         | 11.48427333 | 0.054848333 | 209.3823574 |
| 5 | M14 | 28438 | CG12284         | 0.353094333 | 0.012271333 | 28.77391753 |
| 5 | M15 | 25276 | CG14855         | 12.07817267 | 0.038942333 | 310.1553408 |
| 5 | M16 | 28434 | CG11987         | 12.55196333 | 0.045389667 | 276.5379051 |
| 5 | M17 | 25286 | CG14741         | 14.06584    | 0.049988333 | 281.3824559 |
| 5 | M18 | 28439 | CG12341         | 11.38224667 | 0.044165667 | 257.7170804 |
| 5 | M19 | 25275 | CG14789         | 12.19958667 | 0.04146     | 294.2495578 |
| 5 | M20 | 28432 | CG11858         | 10.06458233 | 0.043598667 | 230.8461039 |
| 5 | M21 | 25238 | CG14728         | 12.1063     | 0.041865    | 289.1747283 |
| 5 | M22 | 28433 | CG11902         | 12.64474667 | 0.035687667 | 354.3169909 |
| 5 | M23 | 25281 | CG14683         | 13.20529667 | 0.041481667 | 318.3405521 |
| 5 | M24 | 28448 | CG12205         | 12.89596333 | 0.040075    | 321.7957164 |
| 5 | N01 | 28417 | CG12385         | 16.23366    | 0.071714667 | 226.3645744 |
| 5 | N02 | 23452 | CG4791          | 10.75881133 | 0.064299667 | 167.3229721 |
| 5 | N03 | 28418 | CG12423         | 12.54810933 | 0.060512333 | 207.3644932 |
| 5 | N04 | 28339 | CG1101          | 14.72286667 | 0.053972    | 272.7871242 |
| 5 | N05 | 23430 | CG4521          | 12.462181   | 0.051387667 | 242.5130738 |
| 5 | N06 | 28333 | CG10750         | 13.64179333 | 0.058652667 | 232.5860717 |
| 5 | N07 | 23455 | CG32737         | 10.30310467 | 0.087174333 | 118.1896583 |
| 5 | N08 | 28337 | CG10842         | 13.34368667 | 0.059618333 | 223.8185122 |
| 5 | N09 | 23456 | CG4582          | 12.97583667 | 0.060306    | 215.1665948 |
| 5 | N10 | 28338 | CG10888         | 10.35099833 | 0.056887333 | 181.9561179 |
| 5 | N11 | 23458 | CG4624          | 11.96919833 | 0.058154667 | 205.8166441 |
| 5 | N12 | 28341 | CG11212         | 10.47622967 | 0.044642333 | 234.670298  |
| 5 | N13 | 23437 | CG4432          | 13.33843333 | 0.052468    | 254.2203502 |
| 5 | N14 | 28343 | CG11447         | 13.19591667 | 0.046284667 | 285.103418  |
| 5 | N15 | 23457 | CG4603          | 11.75031333 | 0.053213    | 220.8165924 |
| 5 | N16 | 28344 | CG11474         | 12.09624467 | 0.051420667 | 235.2409148 |
| 5 | N17 | 23460 | CG4694          | 8.594267333 | 0.047656333 | 180.338409  |
| 5 | N18 | 28334 | CG11597         | 11.18888867 | 0.045019667 | 248.5333521 |
| 5 | N19 | 23401 | CG32649         | 12.90385667 | 0.048224667 | 267.5779338 |
| 5 | N20 | 28351 | CG11018         | 10.93914    | 0.040707    | 268.7287199 |
| 5 | N21 | 23465 | CG4472          | 13.87598    | 0.037822667 | 366.8694257 |
| 5 | N22 | 28342 | CG11310         | 13.318652   | 0.041416    | 321.582287  |
| 5 | N23 | 23462 | CG4740          | 14.87691667 | 0.046807333 | 317.8330319 |
| 5 | N24 | 28335 | CG11622         | 10.361066   | 0.040297667 | 257.1132985 |
| 5 | O01 | 28524 | CG13160         | 12.70035    | 0.076003667 | 167.1018065 |
| 5 | O02 | 25280 | CG15639,CG16825 | 14.82591    | 0.071824    | 206.4199989 |
| 5 | O03 | 28523 | CG13079         | 11.287959   | 0.053749333 | 210.0111443 |
| 5 | O04 | 25271 | CG15732         | 12.71752667 | 0.055821667 | 227.8242021 |
| 5 | O05 | 28541 | CG12885         | 7.955572667 | 0.051673667 | 153.957967  |
| 5 | O06 | 25282 | CG15706         | 12.44361167 | 0.055828    | 222.8919479 |
| 5 | O07 | 28543 | CG13037         | 12.2293     | 0.054193333 | 225.6605979 |
| 5 | O08 | 28400 | CG12048         | 10.29665267 | 0.052183333 | 197.3168828 |
| 5 | O09 | 28537 | CG13239         | 12.98317333 | 0.069928    | 185.6648743 |
| 5 | O10 | 28440 | CG11781         | 9.817787667 | 0.062273333 | 157.6563698 |
| 5 | O11 | 25209 | CG14661         | 10.653625   | 0.051435    | 207.1279285 |
| 5 | O12 | 28449 | CG12240         | 11.94810667 | 0.053300667 | 224.1643006 |
| 5 | O13 | 25289 | CG15514         | 12.30835    | 0.053354333 | 230.690728  |
| 5 | O14 | 28450 | CG12307         | 12.24484667 | 0.048310667 | 253.4605194 |
| 5 | O15 | 25288 | CG14861         | 12.67093667 | 0.056943333 | 222.5183516 |
| 5 | O16 | 28446 | CG11989         | 10.09910133 | 0.043768667 | 230.7381536 |
| 5 | O17 | 25285 | CG14708         | 12.75878    | 0.047683667 | 267.5712858 |

|   |     |       |          |             |             |             |
|---|-----|-------|----------|-------------|-------------|-------------|
| 5 | O18 | 28451 | CG32848  | 13.10581    | 0.055297    | 237.0076134 |
| 5 | O19 | 25245 | CG14667  | 9.053151333 | 0.053236667 | 170.0548118 |
| 5 | O20 | 28444 | CG11865  | 12.40190667 | 0.045836333 | 270.5693446 |
| 5 | O21 | 3     | wts      | 63.78082333 | 0.033675333 | 1893.992339 |
| 5 | O22 | 7     | HFA17794 | 1.443374    | 0.011680667 | 123.569488  |
| 5 | O23 | 4     | hpo      | 36.84583667 | 0.036008667 | 1023.249125 |
| 5 | O24 | 8     | Luc      | 1.537739    | 0.045604667 | 33.71889573 |
| 5 | P01 | 28429 | CG12387  | 13.42556333 | 0.085340667 | 157.3173009 |
| 5 | P02 | 23464 | CG31213  | 12.04661333 | 0.079995    | 150.5920787 |
| 5 | P03 | 28430 | CG12425  | 12.4048     | 0.074751    | 165.9482816 |
| 5 | P04 | 28315 | CG10978  | 9.266349    | 0.081823667 | 113.2477849 |
| 5 | P05 | 23442 | CG4531   | 8.897864    | 0.064195333 | 138.6060877 |
| 5 | P06 | 28345 | CG10751  | 10.48158    | 0.063236667 | 165.7516209 |
| 5 | P07 | 23467 | CG4565   | 13.10403333 | 0.06414     | 204.3036067 |
| 5 | P08 | 28349 | CG10843  | 9.394013667 | 0.061409667 | 152.9728816 |
| 5 | P09 | 23468 | CG4584   | 10.98888233 | 0.058421667 | 188.0960089 |
| 5 | P10 | 28350 | CG10899  | 11.21307    | 0.057176667 | 196.1126917 |
| 5 | P11 | 23470 | CG4625   | 8.080840667 | 0.052739    | 153.223244  |
| 5 | P12 | 28353 | CG11236  | 9.732244667 | 0.064328333 | 151.2901728 |
| 5 | P13 | 23471 | CG4661   | 10.07391333 | 0.054109333 | 186.1769997 |
| 5 | P14 | 28355 | CG11455  | 12.71357667 | 0.054817667 | 231.9248053 |
| 5 | P15 | 23469 | CG4605   | 11.06981667 | 0.052577333 | 210.5435169 |
| 5 | P16 | 28356 | CG1148   | 12.0438     | 0.057224667 | 210.465184  |
| 5 | P17 | 23472 | CG4698   | 13.13264    | 0.045885667 | 286.2035349 |
| 5 | P18 | 28346 | CG11598  | 11.84955333 | 0.049916    | 237.3898817 |
| 5 | P19 | 23413 | CG4414   | 11.95118667 | 0.048042333 | 248.7636598 |
| 5 | P20 | 28352 | CG1108   | 10.74358667 | 0.049337667 | 217.7562782 |
| 5 | P21 |       | wts      | 53.58538667 | 0.033980333 | 1576.952943 |
| 5 | P22 |       | HFA17794 | 1.079039    | 0.012573    | 85.82191999 |
| 5 | P23 |       | hpo      | 40.60222333 | 0.041178667 | 986.0014085 |
| 5 | P24 |       | Luc      | 1.732237333 | 0.055066667 | 31.45709443 |
| 6 | A01 |       | DIAP1    | 0.487165    | 0.007403    | 65.80642983 |
| 6 | A02 |       | ex/ft    | 43.39520333 | 0.048884333 | 887.7118777 |
| 6 | A03 |       | Luc      | 1.746336333 | 0.063888667 | 27.33405507 |
| 6 | A04 |       | hpo      | 36.66511    | 0.046571    | 787.2948831 |
| 6 | A05 | 22514 | CG1616   | 11.10720667 | 0.060987333 | 182.1231731 |
| 6 | A06 | 27509 | CG7925   | 14.09879667 | 0.053547333 | 263.2959625 |
| 6 | A07 | 22519 | CG1683   | 11.92569    | 0.052226333 | 228.3463004 |
| 6 | A08 | 27500 | CG9954   | 9.395152333 | 0.055881    | 168.1278491 |
| 6 | A09 | 22515 | CG3083   | 11.44132333 | 0.056501667 | 202.4953246 |
| 6 | A10 | 27508 | CG5323   | 13.70335667 | 0.059164    | 231.6164672 |
| 6 | A11 | 22524 | CG32701  | 11.260192   | 0.064972    | 173.308379  |
| 6 | A12 | 27505 | CG6395   | 12.92606    | 0.050773667 | 254.5819683 |
| 6 | A13 | 22525 | CG3033   | 11.75131    | 0.057434667 | 204.6030852 |
| 6 | A14 | 27503 | CG17362  | 11.029972   | 0.049490333 | 222.8712408 |
| 6 | A15 | 22520 | CG1715   | 11.33721167 | 0.056736333 | 199.8227767 |
| 6 | A16 | 27499 | CG9231   | 11.62383333 | 0.054252    | 214.2563101 |
| 6 | A17 | 22521 | CG1791   | 11.75686    | 0.052802667 | 222.6565577 |
| 6 | A18 | 23094 | CG9712   | 9.793769667 | 0.181636    | 53.91976077 |
| 6 | A19 | 22522 | CG1818   | 14.06575    | 0.04458     | 315.517048  |
| 6 | A20 | 23089 | CG18358  | 11.95452333 | 0.037212333 | 321.251646  |
| 6 | A21 | 22530 | CG1657   | 14.62883333 | 0.041237    | 354.7501839 |
| 6 | A22 | 23096 | CG9849   | 13.15136333 | 0.047255333 | 278.3043184 |
| 6 | A23 | 22600 | CG3234   | 14.20867333 | 0.046470667 | 305.7557456 |

|   |     |       |                 |             |             |             |
|---|-----|-------|-----------------|-------------|-------------|-------------|
| 6 | A24 | 23093 | CG9676          | 12.661659   | 0.052161333 | 242.7403249 |
| 6 | B01 |       | DIAP1           | 0.610794    | 0.009286333 | 65.77343049 |
| 6 | B02 |       | ex/ft           | 50.74256667 | 0.056167    | 903.4231251 |
| 6 | B03 |       | Luc             | 2.356794667 | 0.063645    | 37.03031922 |
| 6 | B04 |       | hpo             | 36.58033667 | 0.063563    | 575.4973281 |
| 6 | B05 | 23099 | CG9953          | 12.75277667 | 0.059206333 | 215.3954813 |
| 6 | B06 | 24726 | CG10823         | 11.49809    | 0.065667667 | 175.0951508 |
| 6 | B07 | 23100 | CG1019          | 12.94338567 | 0.068405    | 189.216953  |
| 6 | B08 | 24728 | CG10898         | 14.24892667 | 0.059309333 | 240.2476283 |
| 6 | B09 | 23091 | CG1233          | 14.70701333 | 0.063470667 | 231.7135475 |
| 6 | B10 | 24718 | CG10920         | 11.87528033 | 0.053523333 | 221.8710905 |
| 6 | B11 | 23097 | CG9879          | 12.51626667 | 0.05176     | 241.8134982 |
| 6 | B12 | 24719 | CG10956         | 12.233688   | 0.055259667 | 221.3854831 |
| 6 | B13 | 23090 | CG1133          | 9.191661    | 0.058619333 | 156.8025509 |
| 6 | B14 | 24749 | CG10794         | 13.41299333 | 0.053103333 | 252.5828887 |
| 6 | B15 | 24723 | CG10688         | 13.30771333 | 0.054461333 | 244.3515889 |
| 6 | B16 | 27982 | CG10869         | 12.42945    | 0.047526333 | 261.5276443 |
| 6 | B17 | 24724 | CG32410         | 14.42847667 | 0.046466667 | 310.5124103 |
| 6 | B18 | 27977 | CG1707          | 9.978612667 | 0.045491    | 219.3535571 |
| 6 | B19 | 24717 | CG15630         | 15.45334667 | 0.061909333 | 249.6125517 |
| 6 | B20 | 27987 | CG14479,CG33006 | 12.96469967 | 0.047518333 | 272.8357406 |
| 6 | B21 | 24725 | CG10778         | 9.177193667 | 0.051814    | 177.1180312 |
| 6 | B22 | 27986 | CG13215         | 12.92042333 | 0.054271    | 238.0723284 |
| 6 | B23 | 24733 | CG15873         | 10.90991967 | 0.041868667 | 260.5748053 |
| 6 | B24 | 27995 | CG14752         | 1.366501333 | 0.033379    | 40.93895363 |
| 6 | C01 | 28264 | CG11630         | 11.57362    | 0.048373    | 239.2578505 |
| 6 | C02 | 27506 | CG17985         | 12.71622667 | 0.049162    | 258.6596694 |
| 6 | C03 | 28348 | CG1171          | 12.18083333 | 0.04876     | 249.8120044 |
| 6 | C04 | 27516 | CG31243         | 11.17818633 | 0.052126333 | 214.4441325 |
| 6 | C05 | 22526 | CG1624          | 9.382879667 | 0.04104     | 228.6276722 |
| 6 | C06 | 27521 | CG7931,CG7933   | 11.67758667 | 0.055838667 | 209.1308293 |
| 6 | C07 | 22531 | CG1688          | 11.12884333 | 0.041333667 | 269.2440384 |
| 6 | C08 | 27512 | CG10112         | 14.63244    | 0.054564333 | 268.1685839 |
| 6 | C09 | 22527 | CG3085          | 11.92596267 | 0.05323     | 224.0458889 |
| 6 | C10 | 27520 | CG5887          | 8.115105    | 0.051167    | 158.6003674 |
| 6 | C11 | 22540 | CG3165          | 14.64845333 | 0.054078    | 270.8763884 |
| 6 | C12 | 27585 | CG17284         | 12.47602667 | 0.047752667 | 261.2634547 |
| 6 | C13 | 22537 | CG3045          | 9.963405667 | 0.049996667 | 199.2813988 |
| 6 | C14 | 27548 | CG12357         | 4.951135667 | 0.039942667 | 123.956062  |
| 6 | C15 | 22532 | CG1728          | 14.55362667 | 0.040929667 | 355.5764767 |
| 6 | C16 | 27584 | CG13969         | 12.08712    | 0.043808333 | 275.9091497 |
| 6 | C17 | 22533 | CG1792          | 14.84864333 | 0.043296667 | 342.9511895 |
| 6 | C18 | 23106 | CG9743          | 10.931805   | 0.043748333 | 249.8793478 |
| 6 | C19 | 22541 | CG3209          | 12.33578667 | 0.051792667 | 238.1763184 |
| 6 | C20 | 23167 | CG9834          | 9.991183667 | 0.035744    | 279.5205815 |
| 6 | C21 | 22606 | CG2993          | 11.79347    | 0.031349333 | 376.1952407 |
| 6 | C22 | 23108 | CG9853          | 10.52295667 | 0.035756667 | 294.2935583 |
| 6 | C23 | 27510 | CG15321         | 1.158261    | 0.067826    | 17.07694689 |
| 6 | C24 | 23105 | CG9677          | 2.115617667 | 0.033257667 | 63.61293135 |
| 6 | D01 | 23110 | CG9921          | 12.07223033 | 0.065838333 | 183.3617244 |
| 6 | D02 | 24720 | CG32113         | 6.935104333 | 0.053347667 | 129.9982692 |
| 6 | D03 | 23092 | CG1303          | 11.42382167 | 0.055871    | 204.4678217 |
| 6 | D04 | 24727 | CG10864         | 9.288958333 | 0.058232667 | 159.5145623 |
| 6 | D05 | 23111 | CG32171         | 11.25135167 | 0.050994667 | 220.6378118 |

|   |     |       |                 |             |             |             |
|---|-----|-------|-----------------|-------------|-------------|-------------|
| 6 | D06 | 24738 | CG10824         | 10.65503667 | 0.057066    | 186.7142724 |
| 6 | D07 | 23112 | CG1046          | 11.496097   | 0.052806333 | 217.7029965 |
| 6 | D08 | 24740 | CG31119         | 10.77734    | 0.05168     | 208.5398607 |
| 6 | D09 | 23103 | CG1240          | 11.61788    | 0.049362    | 235.3608039 |
| 6 | D10 | 24730 | CG10927         | 10.892139   | 0.050103333 | 217.3935001 |
| 6 | D11 | 23109 | CG9888          | 5.445602667 | 0.04922     | 110.6380062 |
| 6 | D12 | 24731 | CG10959         | 12.24880667 | 0.051594333 | 237.4060459 |
| 6 | D13 | 23102 | CG1139          | 11.22472767 | 0.045808333 | 245.0368055 |
| 6 | D14 | 24761 | CG10798         | 12.76303333 | 0.038621333 | 330.465891  |
| 6 | D15 | 24735 | CG10692         | 12.93259333 | 0.045582    | 283.7214983 |
| 6 | D16 | 27994 | CG11131         | 12.54472333 | 0.039600333 | 316.7832762 |
| 6 | D17 | 24736 | CG33038         | 13.305012   | 0.040336    | 329.854522  |
| 6 | D18 | 27989 | CG1746          | 6.915534333 | 0.025071667 | 275.8306588 |
| 6 | D19 | 24729 | CG15667         | 10.05374733 | 0.039569333 | 254.0792701 |
| 6 | D20 | 27999 | CG14611         | 10.22635767 | 0.037624667 | 271.7992895 |
| 6 | D21 | 24737 | CG10793         | 11.943872   | 0.038209    | 312.5931587 |
| 6 | D22 | 27998 | CG13227         | 11.58936333 | 0.037902    | 305.771815  |
| 6 | D23 | 24745 | CG16713         | 11.97991333 | 0.038388333 | 312.0717232 |
| 6 | D24 | 28007 | CG14777,CG32808 | 1.106827333 | 0.024679    | 44.8489539  |
| 6 | E01 | 28276 | CG1165          | 15.70975667 | 0.064618333 | 243.1160919 |
| 6 | E02 | 27518 | CG1458          | 15.37426333 | 0.066374333 | 231.629646  |
| 6 | E03 | 22523 | CG2950          | 16.38290667 | 0.062732667 | 261.1543162 |
| 6 | E04 | 27528 | CG32692,CG32694 | 6.628835333 | 0.049714333 | 133.338514  |
| 6 | E05 | 22538 | CG1628          | 13.03465667 | 0.048925    | 266.4211889 |
| 6 | E06 | 27532 | CG8009          | 16.42808    | 0.052698333 | 311.7381321 |
| 6 | E07 | 22543 | CG1691          | 12.26631    | 0.058103333 | 211.1119844 |
| 6 | E08 | 27524 | CG31145         | 11.13537333 | 0.050209333 | 221.7789521 |
| 6 | E09 | 22539 | CG3104          | 16.22124667 | 0.05136     | 315.834242  |
| 6 | E10 | 27531 | CG32560         | 13.91241    | 0.046765    | 297.4962044 |
| 6 | E11 | 22548 | CG3004          | 10.48588167 | 0.052773    | 198.6978505 |
| 6 | E12 | 27529 | CG8804          | 12.76936    | 0.046578667 | 274.1461041 |
| 6 | E13 | 22549 | CG3050          | 14.37040667 | 0.051002    | 281.7616303 |
| 6 | E14 | 27560 | CG12372         | 20.59229667 | 0.046328    | 444.4892218 |
| 6 | E15 | 22544 | CG1743          | 10.339577   | 0.039624333 | 260.9400873 |
| 6 | E16 | 27523 | CG9306          | 12.94920667 | 0.045190333 | 286.5481556 |
| 6 | E17 | 22587 | CG3186          | 7.780768    | 0.056330333 | 138.1274979 |
| 6 | E18 | 23118 | CG9745          | 10.67503667 | 0.044234667 | 241.3273903 |
| 6 | E19 | 22553 | CG3215          | 13.88431667 | 0.043761333 | 317.2736205 |
| 6 | E20 | 23113 | CG9646          | 13.62323667 | 0.050094667 | 271.9498416 |
| 6 | E21 | 22554 | CG1664          | 4.375724667 | 0.020590333 | 212.513542  |
| 6 | E22 | 23095 | CG9780          | 14.30875333 | 0.041933667 | 341.2235197 |
| 6 | E23 | 27522 | CG15322         | 17.37941    | 0.041693    | 416.8423956 |
| 6 | E24 | 23117 | CG9702          | 15.24118667 | 0.041776    | 364.831163  |
| 6 | F01 | 23122 | CG9924          | 17.45350333 | 0.052930667 | 329.7427452 |
| 6 | F02 | 24809 | CG10814         | 13.83162667 | 0.061116333 | 226.3163693 |
| 6 | F03 | 23120 | CG9855          | 20.29368667 | 0.073005333 | 277.9753991 |
| 6 | F04 | 24739 | CG10866         | 13.57286    | 0.063054    | 215.2577156 |
| 6 | F05 | 23123 | CG9977          | 15.86183    | 0.06613     | 239.8583094 |
| 6 | F06 | 24750 | CG10825         | 15.25309333 | 0.063132667 | 241.6038184 |
| 6 | F07 | 23124 | CG1056          | 12.87550333 | 0.059552    | 216.2060608 |
| 6 | F08 | 24752 | CG10903         | 7.457285333 | 0.061498333 | 121.2599583 |
| 6 | F09 | 23115 | CG32297         | 13.13093    | 0.05681     | 231.1376518 |
| 6 | F10 | 24742 | CG10931         | 10.44102133 | 0.057719333 | 180.8929648 |
| 6 | F11 | 23121 | CG9889          | 13.96451333 | 0.051257333 | 272.4393258 |

|   |     |       |                |             |             |             |
|---|-----|-------|----------------|-------------|-------------|-------------|
| 6 | F12 | 24743 | CG10961        | 12.98002667 | 0.059274333 | 218.9822464 |
| 6 | F13 | 23156 | CG9864         | 13.87292    | 0.053263667 | 260.4574726 |
| 6 | F14 | 24773 | CG10801        | 13.15433    | 0.046332333 | 283.9125305 |
| 6 | F15 | 24747 | CG10693        | 4.059774    | 0.046486333 | 87.3326354  |
| 6 | F16 | 28006 | CG11500,CG2006 | 12.20461333 | 0.048501667 | 251.6328649 |
| 6 | F17 | 24748 | CG10742        | 14.53304333 | 0.046263333 | 314.1374018 |
| 6 | F18 | 28001 | CG2781         | 13.82851333 | 0.043193    | 320.1563525 |
| 6 | F19 | 24741 | CG30394        | 15.27691333 | 0.040112667 | 380.8501055 |
| 6 | F20 | 28011 | CG14677        | 12.33674667 | 0.041056333 | 300.4834009 |
| 6 | F21 | 24722 | CG16747        | 16.1268     | 0.040964667 | 393.6758507 |
| 6 | F22 | 28010 | CG13535        | 14.46898333 | 0.043655333 | 331.4367851 |
| 6 | F23 | 24757 | CG16716        | 12.31935    | 0.039018    | 315.7350454 |
| 6 | F24 | 28044 | CG11084        | 9.987120333 | 0.036083333 | 276.7793164 |
| 6 | G01 | 28288 | CG11652        | 20.76844    | 0.060271667 | 344.5804828 |
| 6 | G02 | 27525 | CG12025        | 13.69776    | 0.064874667 | 211.1418941 |
| 6 | G03 | 22535 | CG2952         | 15.03410667 | 0.054485333 | 275.9294244 |
| 6 | G04 | 27530 | CG3039         | 13.43865333 | 0.059704667 | 225.0854763 |
| 6 | G05 | 22550 | CG1629         | 14.91062333 | 0.054763    | 272.2755023 |
| 6 | G06 | 27544 | CG8511         | 12.53193667 | 0.055622667 | 225.3026943 |
| 6 | G07 | 22555 | CG1692         | 15.01797    | 0.054141    | 277.3862692 |
| 6 | G08 | 27535 | CG33005        | 10.86272733 | 0.061672667 | 176.1351977 |
| 6 | G09 | 22551 | CG3106         | 18.54949    | 0.048340667 | 383.7243315 |
| 6 | G10 | 27543 | CG6005         | 16.18863333 | 0.052202333 | 310.1132133 |
| 6 | G11 | 22560 | CG3016         | 13.49413667 | 0.049089    | 274.8912519 |
| 6 | G12 | 27540 | CG8857         | 1.693302333 | 0.039308667 | 43.07707376 |
| 6 | G13 | 22561 | CG3056         | 13.79142    | 0.053705667 | 256.7963654 |
| 6 | G14 | 27538 | CG17622        | 14.58649    | 0.045665    | 319.4238476 |
| 6 | G15 | 22564 | CG3168         | 14.35587    | 0.052842667 | 271.6719444 |
| 6 | G16 | 27534 | CG31673        | 17.04122333 | 0.047771    | 356.727373  |
| 6 | G17 | 22557 | CG1794         | 17.10767    | 0.049622667 | 344.7551522 |
| 6 | G18 | 23130 | CG9752         | 18.12702    | 0.047192    | 384.1121377 |
| 6 | G19 | 22565 | CG3225         | 19.16823333 | 0.044923333 | 426.6876901 |
| 6 | G20 | 23125 | CG9655         | 17.42681333 | 0.049218667 | 354.0691878 |
| 6 | G21 | 22566 | CG1665         | 16.74457667 | 0.044016667 | 380.4144642 |
| 6 | G22 | 23107 | CG9791         | 14.09853333 | 0.04151     | 339.6418534 |
| 6 | G23 | 27502 | CG32635        | 14.58238667 | 0.044201333 | 329.9082984 |
| 6 | G24 | 23129 | CG9704         | 16.54911    | 0.043563667 | 379.8833125 |
| 6 | H01 | 23134 | CG9929         | 16.13050333 | 0.063982333 | 252.1087071 |
| 6 | H02 | 24744 | CG11007        | 10.93123167 | 0.065101667 | 167.9101662 |
| 6 | H03 | 23132 | CG9858         | 12.88253333 | 0.058902333 | 218.7100681 |
| 6 | H04 | 24751 | CG31935        | 9.540328667 | 0.045492333 | 209.7128894 |
| 6 | H05 | 23135 | CG9981         | 12.249371   | 0.056136    | 218.2088321 |
| 6 | H06 | 24762 | CG10830        | 13.91805667 | 0.052159333 | 266.837319  |
| 6 | H07 | 23136 | CG1058         | 13.22624    | 0.052119    | 253.7700263 |
| 6 | H08 | 24764 | CG10909        | 14.27199333 | 0.054317333 | 262.7520988 |
| 6 | H09 | 23127 | CG1262         | 15.23679    | 0.046888    | 324.9613974 |
| 6 | H10 | 24754 | CG10932        | 13.91299667 | 0.051976667 | 267.67774   |
| 6 | H11 | 23133 | CG9890         | 13.99550333 | 0.048065    | 291.1786816 |
| 6 | H12 | 24755 | CG10970        | 14.63807667 | 0.052562333 | 278.4898565 |
| 6 | H13 | 23168 | CG9867         | 15.22603333 | 0.050520667 | 301.3822726 |
| 6 | H14 | 24785 | CG10804        | 15.20059333 | 0.051018667 | 297.9417991 |
| 6 | H15 | 24759 | CG10698        | 13.73001    | 0.048143    | 285.1922398 |
| 6 | H16 | 28018 | CG12593        | 8.883944667 | 0.055788667 | 159.2428211 |
| 6 | H17 | 24760 | CG10748        | 15.75336    | 0.04546     | 346.5323361 |

|   |     |       |                       |             |             |             |
|---|-----|-------|-----------------------|-------------|-------------|-------------|
| 6 | H18 | 28043 | CG5480                | 29.18021667 | 0.047038667 | 620.3453187 |
| 6 | H19 | 24753 | CG15727               | 15.41166667 | 0.046942667 | 328.308291  |
| 6 | H20 | 28023 | CG14952               | 13.74203    | 0.042366667 | 324.3594807 |
| 6 | H21 | 24734 | CG16761               | 16.00443667 | 0.048654    | 328.9439032 |
| 6 | H22 | 28033 | CG12688               | 14.90929333 | 0.049458333 | 301.4515922 |
| 6 | H23 | 24769 | CG16718               | 14.78016333 | 0.045802    | 322.6968982 |
| 6 | H24 | 28031 | CG15007               | 25.20024333 | 0.053122    | 474.3843103 |
| 6 | I01 | 28300 | CG11665               | 16.13324333 | 0.062029    | 260.0919462 |
| 6 | I02 | 27573 | CG17268               | 10.56251533 | 0.059704    | 176.9147014 |
| 6 | I03 | 22547 | CG2975                | 12.98398667 | 0.068646667 | 189.1422744 |
| 6 | I04 | 27542 | CG3661                | 1.579673333 | 0.043457333 | 36.34998313 |
| 6 | I05 | 22562 | CG1631                | 15.40106    | 0.060804333 | 253.2888555 |
| 6 | I06 | 27556 | CG8622                | 9.425543    | 0.058992333 | 159.7757279 |
| 6 | I07 | 22567 | CG1696                | 15.34732333 | 0.059729667 | 256.9464085 |
| 6 | I08 | 27547 | CG10466               | 12.23086333 | 0.052042333 | 235.0175818 |
| 6 | I09 | 22563 | CG3114                | 11.91725333 | 0.065540667 | 181.8299071 |
| 6 | I10 | 27555 | CG6058                | 10.53821633 | 0.061350667 | 171.7702008 |
| 6 | I11 | 22572 | CG3017                | 12.81730333 | 0.057893333 | 221.395152  |
| 6 | I12 | 27552 | CG10910               | 12.66391333 | 0.062634667 | 202.1869678 |
| 6 | I13 | 22573 | CG3059                | 14.84860667 | 0.065903667 | 225.3077472 |
| 6 | I14 | 27550 | CG17724               | 5.146698333 | 0.045996333 | 111.8936654 |
| 6 | I15 | 22568 | CG1750                | 11.95710967 | 0.051017333 | 234.3734744 |
| 6 | I16 | 27546 | CG9441                | 12.71401333 | 0.060027    | 211.80491   |
| 6 | I17 | 22569 | CG1800                | 12.90428    | 0.051466333 | 250.7324529 |
| 6 | I18 | 23142 | CG9755                | 13.91219333 | 0.054769667 | 254.0127443 |
| 6 | I19 | 22570 | CG1839                | 11.58773667 | 0.053456667 | 216.7687847 |
| 6 | I20 | 23137 | CG9663                | 13.47183    | 0.044719    | 301.2551712 |
| 6 | I21 | 22577 | CG1669                | 15.07245    | 0.049507333 | 304.4488359 |
| 6 | I22 | 23119 | CG9797                | 15.34304667 | 0.041344    | 371.1069724 |
| 6 | I23 | 27545 | CG15440               | 15.40780667 | 0.046476667 | 331.5170336 |
| 6 | I24 | 23179 | CG9841                | 12.98287333 | 0.046715667 | 277.9126203 |
| 6 | J01 | 23146 | CG9943                | 10.571694   | 0.082090667 | 128.7807059 |
| 6 | J02 | 24756 | CG11010               | 12.713186   | 0.068346    | 186.0121441 |
| 6 | J03 | 23144 | CG9862                | 9.192610667 | 0.064312333 | 142.9369794 |
| 6 | J04 | 24763 | CG31928               | 12.24428333 | 0.059010667 | 207.4927132 |
| 6 | J05 | 23147 | CG9984                | 5.097650667 | 0.049643333 | 102.6855033 |
| 6 | J06 | 24774 | CG10852               | 11.58896333 | 0.066309667 | 174.7703452 |
| 6 | J07 | 23148 | CG1063                | 11.96299667 | 0.065937    | 181.4307091 |
| 6 | J08 | 24776 | CG10914               | 13.49386    | 0.058482    | 230.735269  |
| 6 | J09 | 23139 | CG1276                | 11.364016   | 0.051882667 | 219.0329975 |
| 6 | J10 | 24766 | CG10939               | 14.16614333 | 0.054430667 | 260.2603312 |
| 6 | J11 | 23145 | CG9891                | 11.42329333 | 0.049173333 | 232.3066703 |
| 6 | J12 | 24767 | CG10972               | 14.46469    | 0.056862333 | 254.3808731 |
| 6 | J13 | 23180 | CG9878                | 12.52165333 | 0.049795667 | 251.4607027 |
| 6 | J14 | 24797 | CG10809               | 15.42209    | 0.047354    | 325.676606  |
| 6 | J15 | 24771 | CG10699               | 14.44112    | 0.051413    | 280.8846012 |
| 6 | J16 | 28030 | CG17054,CG3991,CG4007 | 13.39463333 | 0.043322    | 309.1877876 |
| 6 | J17 | 24772 | CG10749               | 12.18111333 | 0.04923     | 247.4327307 |
| 6 | J18 | 28025 | CG4877                | 13.40309333 | 0.051417333 | 260.6726655 |
| 6 | J19 | 24765 | CG15771               | 13.12981    | 0.048813    | 268.9818286 |
| 6 | J20 | 28005 | CG7336                | 16.81404333 | 0.041114667 | 408.9548742 |
| 6 | J21 | 24746 | CG16784               | 12.79980667 | 0.044119333 | 290.1178622 |
| 6 | J22 | 28034 | CG13936               | 14.04527333 | 0.042067    | 333.8786539 |
| 6 | J23 | 24781 | CG16721               | 14.78255333 | 0.046601    | 317.2153673 |



|   |     |       |                 |             |             |             |
|---|-----|-------|-----------------|-------------|-------------|-------------|
| 6 | J24 | 28042 | CG15664         | 14.70849667 | 0.042825    | 343.4558474 |
| 6 | K02 | 27553 | CG1773          | 10.95395167 | 0.07576     | 144.5875352 |
| 6 | K03 | 22528 | CG3159          | 13.90504    | 0.059265667 | 234.6221815 |
| 6 | K04 | 27563 | CG3305          | 13.87074667 | 0.081571667 | 170.0436835 |
| 6 | K05 | 22574 | CG1633          | 12.75966    | 0.062882667 | 202.9121963 |
| 6 | K06 | 27568 | CG8844          | 8.674966333 | 0.057317667 | 151.3489093 |
| 6 | K07 | 22578 | CG1697          | 12.19847333 | 0.057891333 | 210.7132904 |
| 6 | K08 | 27559 | CG10993         | 14.36777333 | 0.060215    | 238.6078773 |
| 6 | K09 | 22575 | CG3131          | 11.811415   | 0.057248    | 206.3201335 |
| 6 | K1  | 28312 | CG11668         | 14.51264333 | 0.047126    | 307.9540664 |
| 6 | K10 | 27567 | CG6090          | 1.480823333 | 0.043293    | 34.20468282 |
| 6 | K11 | 22583 | CG3024          | 7.250810667 | 0.040909667 | 177.239544  |
| 6 | K12 | 27564 | CG18009         | 9.843435667 | 0.070829    | 138.9746526 |
| 6 | K13 | 22594 | CG2985          | 16.55914    | 0.058066333 | 285.1762639 |
| 6 | K14 | 27562 | CG17906         | 12.0901     | 0.047653667 | 253.7076545 |
| 6 | K15 | 22579 | CG1771          | 12.89219667 | 0.051291    | 251.3539737 |
| 6 | K16 | 27558 | CG9449          | 13.04906667 | 0.056508    | 230.9242349 |
| 6 | K17 | 22580 | CG1801          | 12.85035    | 0.051024    | 251.8491298 |
| 6 | K18 | 23154 | CG9766          | 14.54725333 | 0.048574    | 299.4864193 |
| 6 | K19 | 22581 | CG1841          | 12.059946   | 0.054504667 | 221.2644667 |
| 6 | K20 | 23149 | CG9667          | 14.63096333 | 0.073763333 | 198.3500836 |
| 6 | K21 | 22589 | CG1670          | 14.25627667 | 0.051918333 | 274.5904144 |
| 6 | K22 | 23131 | CG9801          | 14.91477667 | 0.047483667 | 314.1033057 |
| 6 | K23 | 27557 | CG15550         | 15.03377667 | 0.044860667 | 335.1215616 |
| 6 | K24 | 23153 | CG9707          | 13.46802667 | 0.044042    | 305.7996155 |
| 6 | L01 | 23158 | CG9945          | 16.78702    | 0.084067    | 199.6862027 |
| 6 | L02 | 24768 | CG11012         | 13.69243    | 0.081266    | 168.489036  |
| 6 | L03 | 23140 | CG1327          | 16.91341333 | 0.082539    | 204.9142022 |
| 6 | L04 | 24811 | CG32956         | 13.83475333 | 0.078096667 | 177.1490887 |
| 6 | L05 | 23159 | CG9989          | 15.75535    | 0.068121333 | 231.283641  |
| 6 | L06 | 24786 | CG32262         | 11.71594    | 0.075222333 | 155.7508187 |
| 6 | L07 | 23160 | CG1082          | 12.31401333 | 0.059740667 | 206.1244713 |
| 6 | L08 | 24788 | CG10915         | 15.68278    | 0.069353667 | 226.127626  |
| 6 | L09 | 23151 | CG1287          | 14.27540333 | 0.070876667 | 201.4118892 |
| 6 | L10 | 24778 | CG10947         | 13.562671   | 0.053586    | 253.1010152 |
| 6 | L11 | 23174 | CG1232          | 15.01742667 | 0.061534667 | 244.048233  |
| 6 | L12 | 24779 | CG10986         | 15.43294333 | 0.062021    | 248.8341583 |
| 6 | L13 | 23150 | CG1218          | 16.24044    | 0.064835    | 250.4887792 |
| 6 | L14 | 27996 | CG33008         | 14.58345    | 0.048223667 | 302.4127157 |
| 6 | L15 | 24783 | CG10699,CG10700 | 15.70285    | 0.056422    | 278.3107653 |
| 6 | L16 | 28041 | CG31893         | 11.84417    | 0.051813667 | 228.59162   |
| 6 | L17 | 24784 | CG10754         | 13.71901667 | 0.114907333 | 119.3920028 |
| 6 | L18 | 28037 | CG4982          | 11.71872133 | 0.043907333 | 266.8966763 |
| 6 | L19 | 24794 | CG16838         | 16.48874    | 0.050942333 | 323.6746125 |
| 6 | L20 | 28017 | CG7350          | 2.593362    | 0.041227    | 62.90445582 |
| 6 | L21 | 24806 | CG16858         | 15.97521    | 0.052797    | 302.5779874 |
| 6 | L22 | 28045 | CG31062         | 13.27240667 | 0.046024    | 288.3801205 |
| 6 | L23 | 24793 | CG16728         | 14.95251667 | 0.045233667 | 330.561676  |
| 6 | L24 | 28054 | CG16707         | 14.39218333 | 0.043688667 | 329.4260144 |
| 6 | M01 | 28324 | CG1168          | 13.20455333 | 0.065475667 | 201.6711552 |
| 6 | M02 | 27565 | CG1780          | 14.29234    | 0.066648667 | 214.4429996 |
| 6 | M03 | 22571 | CG2979          | 16.61666333 | 0.062477333 | 265.9630693 |
| 6 | M04 | 27575 | CG4766          | 12.83188667 | 0.046830667 | 274.0060644 |
| 6 | M05 | 22585 | CG1634          | 11.45567667 | 0.049088667 | 233.3670365 |

|   |     |       |                 |             |             |             |
|---|-----|-------|-----------------|-------------|-------------|-------------|
| 6 | M06 | 27580 | CG8922          | 1.989915333 | 0.043820667 | 45.41043039 |
| 6 | M07 | 22590 | CG1698          | 11.21446    | 0.055425    | 202.3357691 |
| 6 | M08 | 27571 | CG11024         | 11.46431267 | 0.064196    | 178.5829751 |
| 6 | M09 | 22586 | CG3132          | 12.27055567 | 0.054252667 | 226.1742403 |
| 6 | M10 | 27579 | CG6494          | 11.70842    | 0.052460333 | 223.1861533 |
| 6 | M11 | 22595 | CG3027          | 12.28042    | 0.062067333 | 197.856414  |
| 6 | M12 | 27576 | CG14213         | 4.471834    | 0.046235333 | 96.71897394 |
| 6 | M13 | 22596 | CG3071          | 7.190793667 | 0.049600333 | 144.9747045 |
| 6 | M14 | 27574 | CG31358         | 12.84929    | 0.042863333 | 299.7734661 |
| 6 | M15 | 22591 | CG1774          | 14.64822667 | 0.04599     | 318.5089512 |
| 6 | M16 | 27570 | CG33085         | 14.13446667 | 0.045367333 | 311.5560389 |
| 6 | M17 | 22592 | CG1814          | 11.99417467 | 0.044955667 | 266.8000623 |
| 6 | M18 | 23166 | CG9772          | 10.096712   | 0.057748    | 174.8408949 |
| 6 | M19 | 22593 | CG2938          | 15.53149    | 0.055166333 | 281.5392842 |
| 6 | M20 | 23161 | CG9672          | 10.102502   | 0.044867333 | 225.1638609 |
| 6 | M21 | 22599 | CG3198          | 10.64512667 | 0.045054    | 236.2748406 |
| 6 | M22 | 23177 | CG9710          | 13.80060667 | 0.045009    | 306.6188244 |
| 6 | M23 | 27514 | CG16825         | 16.09951    | 0.057440333 | 280.2823219 |
| 6 | M24 | 23165 | CG9709          | 14.28841    | 0.046912    | 304.578999  |
| 6 | N01 | 23170 | CG9946          | 2.879383    | 0.053361    | 53.96043927 |
| 6 | N02 | 24780 | CG11020         | 12.91863333 | 0.068783    | 187.8172417 |
| 6 | N03 | 23152 | CG1341          | 1.374555    | 0.028581667 | 48.09219196 |
| 6 | N04 | 24787 | CG33124         | 12.219851   | 0.06126     | 199.475204  |
| 6 | N05 | 23171 | CG9999          | 9.573337667 | 0.054518333 | 175.598502  |
| 6 | N06 | 24798 | CG10858         | 15.87489    | 0.064905667 | 244.5840373 |
| 6 | N07 | 23172 | CG1115          | 10.808391   | 0.090273    | 119.7300522 |
| 6 | N08 | 24800 | CG10916         | 13.77198    | 0.059294667 | 232.2633851 |
| 6 | N09 | 23163 | CG1291          | 12.088      | 0.052702333 | 229.3636588 |
| 6 | N10 | 24790 | CG10950         | 13.01629333 | 0.053508333 | 243.2573119 |
| 6 | N11 | 23169 | CG9899          | 15.29462667 | 0.058355667 | 262.0932557 |
| 6 | N12 | 24791 | CG10991         | 12.458095   | 0.052853    | 235.7121639 |
| 6 | N13 | 23162 | CG1231          | 14.43411333 | 0.064909    | 222.3746065 |
| 6 | N14 | 28008 | CG4345          | 9.946344    | 0.05252     | 189.3820259 |
| 6 | N15 | 24795 | CG10721         | 13.6955     | 0.045770333 | 299.2222036 |
| 6 | N16 | 28021 | CG12557         | 13.84828667 | 0.047755667 | 289.9820615 |
| 6 | N17 | 24796 | CG10761         | 17.74786    | 0.047553333 | 373.2201037 |
| 6 | N18 | 28048 | CG5435          | 12.31432667 | 0.050919667 | 241.8383205 |
| 6 | N19 | 24789 | CG15828         | 12.39204    | 0.049167333 | 252.0380741 |
| 6 | N20 | 28058 | CG15526         | 8.651000667 | 0.036128333 | 239.4519721 |
| 6 | N21 | 24770 | CG16807         | 12.34758333 | 0.042416333 | 291.1044488 |
| 6 | N22 | 28064 | CG10685,CG10719 | 11.83634333 | 0.042945    | 275.616331  |
| 6 | N23 | 24805 | CG32486         | 12.43429333 | 0.053697667 | 231.5611479 |
| 6 | N24 | 28068 | CG13049         | 12.20075667 | 0.045875333 | 265.9546161 |
| 6 | O01 | 28336 | CG11680         | 13.3051     | 0.063281333 | 210.2531552 |
| 6 | O02 | 27577 | CG1890          | 12.42639667 | 0.085039    | 146.125856  |
| 6 | O03 | 22582 | CG2980          | 13.2714     | 0.090077333 | 147.3334024 |
| 6 | O04 | 27578 | CG5189          | 11.35641967 | 0.069477    | 163.4558151 |
| 6 | O05 | 22597 | CG1639          | 20.40668667 | 0.107409333 | 189.9898829 |
| 6 | O06 | 27592 | CG9134          | 14.14594333 | 0.077794667 | 181.8369297 |
| 6 | O07 | 22602 | CG1710          | 16.42480333 | 0.086538333 | 189.7980086 |
| 6 | O08 | 27583 | CG11641         | 10.40721933 | 0.069233    | 150.3216578 |
| 6 | O09 | 22598 | CG3140          | 8.613958    | 0.067966333 | 126.738601  |
| 6 | O10 | 27572 | CG13920         | 10.13698167 | 0.055507667 | 182.6230911 |
| 6 | O11 | 22607 | CG3028          | 11.20782567 | 0.060067333 | 186.5877016 |

|   |     |       |                |             |             |             |
|---|-----|-------|----------------|-------------|-------------|-------------|
| 6 | O12 | 27588 | CG16749        | 14.13816667 | 0.072378667 | 195.3361027 |
| 6 | O13 | 22552 | CG3166         | 11.81449133 | 0.070096333 | 168.5464955 |
| 6 | O14 | 27586 | CG18156        | 15.56644333 | 0.080996    | 192.1878035 |
| 6 | O15 | 22603 | CG1786         | 14.43779333 | 0.056703    | 254.621331  |
| 6 | O16 | 23155 | CG9828         | 11.82748333 | 0.069585667 | 169.9701088 |
| 6 | O17 | 22588 | CG33123        | 12.8658     | 0.058309    | 220.6486134 |
| 6 | O18 | 23178 | CG9779         | 14.28744333 | 0.059282    | 241.0081194 |
| 6 | O19 | 22605 | CG2945         | 11.53102667 | 0.058408667 | 197.4197893 |
| 6 | O20 | 23173 | CG9675         | 13.05684667 | 0.047083667 | 277.3115943 |
| 6 | O21 |       | wts            | 67.13155333 | 0.049653333 | 1352.004968 |
| 6 | O22 |       | HFA17794       | 1.573281    | 0.01265     | 124.3700395 |
| 6 | O23 |       | hpo            | 44.68441333 | 0.049907667 | 895.3416643 |
| 6 | O24 |       | Luc            | 2.564672333 | 0.042517    | 60.32110293 |
| 6 | P01 | 23182 | CG9947         | 17.85999333 | 0.099432    | 179.6201759 |
| 6 | P02 | 24792 | CG11029        | 14.87792667 | 0.082477    | 180.3887953 |
| 6 | P03 | 23164 | CG1342         | 11.55897333 | 0.082460333 | 140.1761655 |
| 6 | P04 | 24804 | CG11034        | 10.6885     | 0.071877333 | 148.7047377 |
| 6 | P05 | 23183 | CG1004         | 10.927841   | 0.067635    | 161.5707991 |
| 6 | P06 | 24810 | CG10861,CG9762 | 10.05423367 | 0.066445    | 151.3166328 |
| 6 | P07 | 23184 | CG1132         | 10.14655367 | 0.073376333 | 138.2810125 |
| 6 | P08 | 24812 | CG10917        | 8.595876667 | 0.055651667 | 154.4585667 |
| 6 | P09 | 23175 | CG1299         | 13.03139333 | 0.060313667 | 216.0603733 |
| 6 | P10 | 24802 | CG10952        | 12.24641333 | 0.058195333 | 210.4363466 |
| 6 | P11 | 23176 | CG1347         | 14.69212    | 0.074892667 | 196.1756825 |
| 6 | P12 | 24803 | CG10996        | 12.4084     | 0.058312    | 212.7932501 |
| 6 | P13 | 24782 | CG16817        | 13.81094667 | 0.065378333 | 211.2465394 |
| 6 | P14 | 28020 | CG4375         | 11.98619667 | 0.055391    | 216.3924946 |
| 6 | P15 | 24807 | CG10723        | 12.091308   | 0.059733667 | 202.4203213 |
| 6 | P16 | 28065 | CG13993        | 11.28272667 | 0.058531333 | 192.7638758 |
| 6 | P17 | 24808 | CG10777        | 9.933943    | 0.052236    | 190.1742668 |
| 6 | P18 | 28060 | CG6272         | 13.04594    | 0.059307667 | 219.9705491 |
| 6 | P19 | 24801 | CG15835        | 12.78311    | 0.045205667 | 282.7767168 |
| 6 | P20 | 28052 | CG10130        | 12.37531    | 0.054744333 | 226.0564564 |
| 6 | P21 |       | wts            | 57.47780333 | 0.039103667 | 1469.882705 |
| 6 | P22 |       | HFA17794       | 1.267342    | 0.013991    | 90.58266028 |
| 6 | P23 |       | hpo            | 43.99593667 | 0.043181667 | 1018.856845 |
| 6 | P24 |       | Luc            | 1.593106667 | 0.050106    | 31.79472851 |
| 7 | A01 |       | DIAP1          | 0.633042    | 0.00735     | 86.12816327 |
| 7 | A02 |       | ex/ft          | 55.51033333 | 0.075490667 | 735.3271045 |
| 7 | A03 |       | Luc            | 1.526433    | 0.073818333 | 20.67823711 |
| 7 | A04 |       | hpo            | 39.44443667 | 0.062974667 | 626.3540365 |
| 7 | A05 | 27980 | CG17594        | 12.95534    | 0.071953667 | 180.051144  |
| 7 | A06 | 25012 | CG5248         | 12.10871    | 0.055072    | 219.8705331 |
| 7 | A07 | 25101 | CG30149        | 15.33489333 | 0.063934    | 239.8550589 |
| 7 | A08 | 25006 | CG7558         | 8.567969    | 0.068127667 | 125.7634294 |
| 7 | A09 | 25106 | CG13588        | 10.636216   | 0.060319667 | 176.3308153 |
| 7 | A10 | 25015 | CG4276         | 13.02614667 | 0.049243333 | 264.5260949 |
| 7 | A11 | 25107 | CG13648        | 14.01680333 | 0.054988333 | 254.9050405 |
| 7 | A12 | 25010 | CG18582        | 11.64351    | 0.047241667 | 246.4669607 |
| 7 | A13 | 25110 | CG13793        | 10.86498667 | 0.050416667 | 215.5038678 |
| 7 | A14 | 25007 | CG7846         | 13.00316333 | 0.053876    | 241.3535402 |
| 7 | A15 | 25112 | CG32600        | 12.17884    | 0.049047667 | 248.3062055 |
| 7 | A16 | 19097 | CG30171        | 13.75835667 | 0.045037667 | 305.4855565 |
| 7 | A17 | 25108 | CG13685        | 16.40305667 | 0.056388667 | 290.8927917 |

|   |     |       |               |             |             |             |
|---|-----|-------|---------------|-------------|-------------|-------------|
| 7 | A18 | 19089 | CG3692        | 14.84397    | 0.047957667 | 309.5223565 |
| 7 | A19 | 25102 | CG14478       | 12.98102667 | 0.046646667 | 278.2841218 |
| 7 | A20 | 19096 | CG3727,CG3862 | 13.82896    | 0.044794333 | 308.7211924 |
| 7 | A21 | 25117 | CG13531       | 18.02558333 | 0.059205667 | 304.4570621 |
| 7 | A22 | 19105 | CG30420       | 15.4585     | 0.046454333 | 332.7676643 |
| 7 | A23 | 25121 | CG33141       | 17.32456    | 0.050834667 | 340.8020773 |
| 7 | A24 | 19094 | CG3775        | 11.61814    | 0.051827    | 224.1715708 |
| 7 | B01 |       | DIAP1         | 0.530438333 | 0.011290667 | 46.98024917 |
| 7 | B02 |       | ex/ft         | 47.18669    | 0.065246333 | 723.2083029 |
| 7 | B03 |       | Luc           | 1.795351667 | 0.065074667 | 27.58910277 |
| 7 | B04 |       | hpo           | 38.59332667 | 0.056536667 | 682.6247273 |
| 7 | B05 | 19099 | CG3986        | 11.78742667 | 0.071172667 | 165.617325  |
| 7 | B06 | 26838 | CG10631       | 11.71368433 | 0.063993    | 183.0463384 |
| 7 | B07 | 19100 | CG4042        | 13.28053    | 0.059421333 | 223.4976776 |
| 7 | B08 | 26842 | CG11586       | 7.896236667 | 0.058446333 | 135.1023446 |
| 7 | B09 | 19092 | CG4187        | 12.62683333 | 0.061136    | 206.5367923 |
| 7 | B10 | 26921 | CG10623       | 13.03534    | 0.072865    | 178.8971385 |
| 7 | B11 | 19139 | CG4161        | 13.6584     | 0.053864333 | 253.5703898 |
| 7 | B12 | 26741 | CG10053       | 12.45138067 | 0.055947    | 222.5567174 |
| 7 | B13 | 26833 | CG10385       | 12.09054333 | 0.052041667 | 232.3242914 |
| 7 | B14 | 26732 | CG10122       | 7.475091    | 0.058028333 | 128.817951  |
| 7 | B15 | 26834 | CG10420       | 11.36177033 | 0.067836333 | 167.4879784 |
| 7 | B16 | 26731 | CG9149        | 14.17434667 | 0.059433333 | 238.4915311 |
| 7 | B17 | 26832 | CG10338       | 13.18622333 | 0.054775    | 240.7343374 |
| 7 | B18 | 26736 | CG9213        | 11.20023667 | 0.050869667 | 220.1751535 |
| 7 | B19 | 26835 | CG10483       | 12.28833367 | 0.053783667 | 228.4770531 |
| 7 | B20 | 26739 | CG9314        | 11.99432333 | 0.037222    | 322.237476  |
| 7 | B21 | 26837 | CG10592       | 13.93632    | 0.045943667 | 303.3349537 |
| 7 | B22 | 26747 | CG9177        | 7.571635333 | 0.036673333 | 206.461607  |
| 7 | B23 | 26843 | CG10289       | 11.89960333 | 0.06023     | 197.569373  |
| 7 | B24 | 26750 | CG9280        | 14.18092667 | 0.047066    | 301.2987436 |
| 7 | C01 | 27991 | CG8053        | 7.142731333 | 0.036635667 | 194.966599  |
| 7 | C02 | 25026 | CG2574        | 14.07679667 | 0.053633333 | 262.4635799 |
| 7 | C03 | 27990 | CG14334       | 11.43769    | 0.057229    | 199.8582886 |
| 7 | C04 | 25025 | CG1846        | 16.32744333 | 0.057361667 | 284.6403231 |
| 7 | C05 | 27992 | CG1379        | 14.27544667 | 0.051118    | 279.2645774 |
| 7 | C06 | 25024 | CG6384        | 12.35723067 | 0.043762333 | 282.3713848 |
| 7 | C07 | 25113 | CG13473       | 10.41823867 | 0.050763667 | 205.2302237 |
| 7 | C08 | 25018 | CG7595        | 14.54313667 | 0.052719    | 275.8613909 |
| 7 | C09 | 25118 | CG13597       | 15.46827667 | 0.055114    | 280.659663  |
| 7 | C10 | 25009 | CG17998       | 8.152271    | 0.040416667 | 201.7056742 |
| 7 | C11 | 25119 | CG31111       | 4.743502667 | 0.059593    | 79.59831971 |
| 7 | C12 | 25022 | CG1938        | 11.50754667 | 0.049406333 | 232.9164277 |
| 7 | C13 | 25122 | CG13801       | 13.06388    | 0.044818667 | 291.483013  |
| 7 | C14 | 25019 | CG7940        | 16.38409    | 0.055566333 | 294.8564179 |
| 7 | C15 | 25124 | CG14426       | 16.78424    | 0.043479667 | 386.0250385 |
| 7 | C16 | 19109 | CG3903        | 13.53825    | 0.039661333 | 341.3463155 |
| 7 | C17 | 25120 | CG13686       | 14.27102333 | 0.045949    | 310.5839808 |
| 7 | C18 | 19101 | CG3699        | 13.60692667 | 0.039375    | 345.5727407 |
| 7 | C19 | 25114 | CG30106       | 13.74243333 | 0.041236333 | 333.2603125 |
| 7 | C20 | 19119 | CG3843        | 12.33524    | 0.034904    | 353.4047674 |
| 7 | C21 | 25129 | CG13550       | 7.939699667 | 0.065107333 | 121.9478553 |
| 7 | C22 | 19117 | CG3753        | 15.27164    | 0.032833    | 465.1308135 |
| 7 | C23 | 25195 | CG14413       | 16.81003333 | 0.039874333 | 421.5752823 |

|   |     |       |         |             |             |             |
|---|-----|-------|---------|-------------|-------------|-------------|
| 7 | C24 | 19155 | CG3856  | 13.98593    | 0.039090333 | 357.7848744 |
| 7 | D01 | 19098 | CG3931  | 7.205599667 | 0.071602    | 100.6340558 |
| 7 | D02 | 26840 | CG11378 | 14.17792667 | 0.063144    | 224.5332362 |
| 7 | D03 | 19090 | CG4084  | 10.32236233 | 0.050422    | 204.7194148 |
| 7 | D04 | 26841 | CG11488 | 11.795861   | 0.051492667 | 229.0784642 |
| 7 | D05 | 19111 | CG3994  | 12.90555333 | 0.057021    | 226.3298317 |
| 7 | D06 | 26850 | CG10639 | 11.89496167 | 0.052609    | 226.1012691 |
| 7 | D07 | 19112 | CG4049  | 11.751083   | 0.052061    | 225.7175813 |
| 7 | D08 | 26854 | CG11596 | 12.10655667 | 0.050987333 | 237.4424367 |
| 7 | D09 | 19104 | CG4190  | 15.04139333 | 0.048353667 | 311.0703773 |
| 7 | D10 | 26749 | CG9253  | 4.312988    | 0.041888    | 102.9647632 |
| 7 | D11 | 19151 | CG4163  | 13.97238    | 0.053053333 | 263.3647901 |
| 7 | D12 | 26753 | CG10064 | 14.14107333 | 0.056006    | 252.4921139 |
| 7 | D13 | 26845 | CG10387 | 13.96384    | 0.053221    | 262.3746266 |
| 7 | D14 | 26744 | CG10123 | 11.74412333 | 0.041289333 | 284.4348016 |
| 7 | D15 | 26846 | CG10424 | 14.06947    | 0.041017    | 343.0155789 |
| 7 | D16 | 26743 | CG31651 | 13.54319    | 0.055776    | 242.8139343 |
| 7 | D17 | 26844 | CG10343 | 9.399882    | 0.042966333 | 218.7731945 |
| 7 | D18 | 26748 | CG9224  | 12.2093     | 0.041992667 | 290.7483846 |
| 7 | D19 | 26847 | CG10484 | 0.864343667 | 0.018446333 | 46.85720739 |
| 7 | D20 | 26788 | CG10009 | 11.67358667 | 0.035945667 | 324.756438  |
| 7 | D21 | 26849 | CG10600 | 13.13816    | 0.038190333 | 344.0179452 |
| 7 | D22 | 26759 | CG9186  | 16.2318     | 0.041881333 | 387.5664576 |
| 7 | D23 | 26855 | CG31148 | 13.86347667 | 0.043769    | 316.7419102 |
| 7 | D24 | 26762 | CG9285  | 16.24997333 | 0.041053333 | 395.8259175 |
| 7 | E01 | 28003 | CG8338  | 20.4781     | 0.060347667 | 339.3354065 |
| 7 | E02 | 25038 | CG2774  | 18.52300333 | 0.059934    | 309.0566846 |
| 7 | E03 | 28002 | CG2239  | 19.86631667 | 0.066209    | 300.054625  |
| 7 | E04 | 25037 | CG1915  | 16.30049667 | 0.060709667 | 268.4991956 |
| 7 | E05 | 28024 | CG18285 | 15.32815667 | 0.063014333 | 243.2487318 |
| 7 | E06 | 25036 | CG6433  | 15.55537667 | 0.062161    | 250.2433466 |
| 7 | E07 | 25125 | CG13480 | 15.10800667 | 0.057725    | 261.7238054 |
| 7 | E08 | 25030 | CG31232 | 14.41951667 | 0.051148667 | 281.9138329 |
| 7 | E09 | 25130 | CG13602 | 16.22948333 | 0.058847667 | 275.7880516 |
| 7 | E10 | 25039 | CG5087  | 18.27252    | 0.054343    | 336.2442265 |
| 7 | E11 | 25131 | CG31106 | 18.38717    | 0.058345333 | 315.143799  |
| 7 | E12 | 25091 | CG2699  | 15.10802    | 0.054759    | 275.9002173 |
| 7 | E13 | 25134 | CG13803 | 15.34679333 | 0.090318333 | 169.9189164 |
| 7 | E14 | 25071 | CG5000  | 16.09058667 | 0.070439333 | 228.4318421 |
| 7 | E15 | 25136 | CG14430 | 15.16007    | 0.054324    | 279.0676312 |
| 7 | E16 | 19121 | CG3905  | 16.19914    | 0.049774667 | 325.4494924 |
| 7 | E17 | 25132 | CG13688 | 18.97015333 | 0.047492333 | 399.4361195 |
| 7 | E18 | 19113 | CG3705  | 17.61962    | 0.049644333 | 354.9170432 |
| 7 | E19 | 25126 | CG14487 | 17.57316    | 0.050284667 | 349.4735307 |
| 7 | E20 | 19120 | CG3874  | 14.5731     | 0.051010667 | 285.6873072 |
| 7 | E21 | 25141 | CG13559 | 13.70776333 | 0.046173333 | 296.8761912 |
| 7 | E22 | 19129 | CG3757  | 15.02120667 | 0.04395     | 341.7794463 |
| 7 | E23 | 25145 | CG32796 | 15.35475667 | 0.046999    | 326.7039015 |
| 7 | E24 | 19118 | CG3797  | 15.12659667 | 0.04058     | 372.7598981 |
| 7 | F01 | 19110 | CG3935  | 14.45994667 | 0.072831667 | 198.5392801 |
| 7 | F02 | 26852 | CG11395 | 15.61337333 | 0.075247    | 207.494961  |
| 7 | F03 | 19174 | CG4110  | 16.893      | 0.074818333 | 225.7869061 |
| 7 | F04 | 26853 | CG11502 | 18.53299667 | 0.055990667 | 331.001536  |
| 7 | F05 | 19123 | CG4009  | 14.12256333 | 0.060251667 | 234.3929075 |

|   |     |       |                |             |             |             |
|---|-----|-------|----------------|-------------|-------------|-------------|
| 7 | F06 | 26862 | CG10645        | 12.71563667 | 0.053547    | 237.466836  |
| 7 | F07 | 19124 | CG4051         | 15.94015    | 0.061268667 | 260.1680576 |
| 7 | F08 | 26866 | CG30092        | 15.51367    | 0.057890333 | 267.9837739 |
| 7 | F09 | 19116 | CG4193         | 10.64251567 | 0.053815667 | 197.7586886 |
| 7 | F10 | 26761 | CG9256         | 14.38969    | 0.049699    | 289.5368116 |
| 7 | F11 | 26836 | CG10521        | 15.25616667 | 0.055609333 | 274.3454336 |
| 7 | F12 | 26765 | CG31492        | 21.62431667 | 0.053041    | 407.6905916 |
| 7 | F13 | 26857 | CG10391        | 13.84853333 | 0.050812333 | 272.5427554 |
| 7 | F14 | 26756 | CG10124        | 14.00752    | 0.043711667 | 320.4526633 |
| 7 | F15 | 26858 | CG10440        | 13.91557    | 0.045829333 | 303.6389358 |
| 7 | F16 | 26790 | CG10116        | 13.12041667 | 0.056060333 | 234.0410034 |
| 7 | F17 | 26856 | CG10346        | 11.61295667 | 0.054966    | 211.2752732 |
| 7 | F18 | 26760 | CG9226         | 13.36542    | 0.047888    | 279.0974774 |
| 7 | F19 | 26859 | CG10489        | 12.48192667 | 0.050052    | 249.379179  |
| 7 | F20 | 26763 | CG9317         | 15.94656333 | 0.048374667 | 329.6469915 |
| 7 | F21 | 26861 | CG31692        | 15.50424667 | 0.040627333 | 381.6210761 |
| 7 | F22 | 26771 | CG9193         | 6.607368    | 0.044299667 | 149.1516415 |
| 7 | F23 | 26867 | CG10302        | 19.17855    | 0.045425333 | 422.1994335 |
| 7 | F24 | 26824 | CG10051        | 14.79466667 | 0.041975333 | 352.4609691 |
| 7 | G01 | 28015 | CG9070         | 15.74067667 | 0.059029333 | 266.6585539 |
| 7 | G02 | 25081 | CG18247        | 18.13549333 | 0.059712    | 303.7160593 |
| 7 | G03 | 28014 | CG2358         | 16.56959333 | 0.059892333 | 276.6563333 |
| 7 | G04 | 25032 | CG3723         | 15.37046667 | 0.053257    | 288.6093221 |
| 7 | G05 | 28036 | CG31869        | 12.70253    | 0.052654333 | 241.2437723 |
| 7 | G06 | 25048 | CG31705        | 15.91496333 | 0.053306333 | 298.5567068 |
| 7 | G07 | 25137 | CG13487        | 15.85522667 | 0.057574    | 275.3886592 |
| 7 | G08 | 25042 | CG7709         | 16.68363333 | 0.048735667 | 342.3290267 |
| 7 | G09 | 25142 | CG13610        | 18.30467    | 0.064081333 | 285.6474584 |
| 7 | G10 | 25051 | CG5300         | 17.97112333 | 0.056892667 | 315.8776761 |
| 7 | G11 | 25143 | CG13656        | 16.594      | 0.048654667 | 341.0566989 |
| 7 | G12 | 25028 | CG6613         | 14.66631667 | 0.049258667 | 297.7408375 |
| 7 | G13 | 25146 | CG13804        | 18.27530667 | 0.043350667 | 421.5692185 |
| 7 | G14 | 25083 | CG5081         | 17.67555    | 0.053083667 | 332.9753031 |
| 7 | G15 | 25148 | CG14437        | 19.50788    | 0.051033667 | 382.2551126 |
| 7 | G16 | 19133 | CG3911         | 13.05655    | 0.052804    | 247.2644118 |
| 7 | G17 | 25144 | CG13690,CG4063 | 16.89578    | 0.046259667 | 365.2378242 |
| 7 | G18 | 19125 | CG3711         | 22.98527    | 0.053527333 | 429.411827  |
| 7 | G19 | 25138 | CG14490        | 20.03392    | 0.046707667 | 428.9214476 |
| 7 | G20 | 19132 | CG3876         | 11.047917   | 0.052057667 | 212.2245907 |
| 7 | G21 | 25153 | CG13567        | 16.81181333 | 0.039807333 | 422.329554  |
| 7 | G22 | 19141 | CG3758         | 14.54084    | 0.048929333 | 297.1804235 |
| 7 | G23 | 25157 | CG13758        | 17.58211    | 0.051997    | 338.1370079 |
| 7 | G24 | 19179 | CG3858         | 14.45587    | 0.046430333 | 311.3453848 |
| 7 | H01 | 19122 | CG3940         | 18.00254    | 0.074028    | 243.1855514 |
| 7 | H02 | 26864 | CG11396        | 13.56440333 | 0.065872667 | 205.9185398 |
| 7 | H03 | 19114 | CG4096         | 14.57722    | 0.066234333 | 220.0855548 |
| 7 | H04 | 26865 | CG11518        | 11.454186   | 0.064688    | 177.0681734 |
| 7 | H05 | 19135 | CG4013         | 13.08453    | 0.046021667 | 284.3123891 |
| 7 | H06 | 26874 | CG10648        | 5.910280667 | 0.06338     | 93.25150941 |
| 7 | H07 | 19136 | CG4053         | 15.10234    | 0.061474667 | 245.6677005 |
| 7 | H08 | 26885 | CG10620        | 13.22092    | 0.061751    | 214.1005004 |
| 7 | H09 | 19128 | CG4195         | 13.25850667 | 0.053864333 | 246.1463058 |
| 7 | H10 | 26773 | CG9267         | 14.54392    | 0.052531333 | 276.8618095 |
| 7 | H11 | 26848 | CG10535        | 22.04409333 | 0.046819333 | 470.8331316 |

|   |     |       |         |             |             |             |
|---|-----|-------|---------|-------------|-------------|-------------|
| 7 | H12 | 26777 | CG10069 | 14.53300333 | 0.057214333 | 254.0098344 |
| 7 | H13 | 26869 | CG10407 | 9.755559667 | 0.051145    | 190.7431746 |
| 7 | H14 | 26768 | CG10125 | 13.83238333 | 0.049964    | 276.8469965 |
| 7 | H15 | 26870 | CG10446 | 15.89414667 | 0.047308    | 335.9716468 |
| 7 | H16 | 26767 | CG9165  | 16.32866667 | 0.048294    | 338.109634  |
| 7 | H17 | 26868 | CG33116 | 15.80048333 | 0.040400333 | 391.0978457 |
| 7 | H18 | 26752 | CG9331  | 14.18932667 | 0.039647333 | 357.8885507 |
| 7 | H19 | 26871 | CG10495 | 13.44351667 | 0.043361    | 310.0370533 |
| 7 | H20 | 26775 | CG9318  | 11.83835267 | 0.041663333 | 284.1431955 |
| 7 | H21 | 26873 | CG10618 | 16.39561667 | 0.047536    | 344.9094721 |
| 7 | H22 | 26802 | CG10117 | 18.93360667 | 0.04344     | 435.8565071 |
| 7 | H23 | 26879 | CG10307 | 16.31830333 | 0.045695333 | 357.1109377 |
| 7 | H24 | 26786 | CG9293  | 7.254455667 | 0.051682333 | 140.3662567 |
| 7 | I01 | 28027 | CG9790  | 13.63610667 | 0.056194    | 242.6612568 |
| 7 | I02 | 25062 | CG3837  | 13.90066833 | 0.069847333 | 199.0150185 |
| 7 | I03 | 28026 | CG3620  | 13.170965   | 0.049642    | 265.3189839 |
| 7 | I04 | 25061 | CG2019  | 12.47426167 | 0.055771667 | 223.6666467 |
| 7 | I05 | 28028 | CG31092 | 13.64448633 | 0.051439333 | 265.2539496 |
| 7 | I06 | 25035 | CG4145  | 13.81854733 | 0.057373667 | 240.851738  |
| 7 | I07 | 25149 | CG13492 | 12.317179   | 0.050994667 | 241.5385727 |
| 7 | I08 | 25080 | CG4209  | 14.52947433 | 0.042021333 | 345.7642388 |
| 7 | I09 | 25154 | CG13620 | 8.644003    | 0.054142333 | 159.653315  |
| 7 | I10 | 25063 | CG5433  | 10.36086867 | 0.054155667 | 191.3164273 |
| 7 | I11 | 25155 | CG13661 | 13.98511033 | 0.050724333 | 275.7081151 |
| 7 | I12 | 25092 | CG4214  | 3.015477667 | 0.068716667 | 43.88276983 |
| 7 | I13 | 25158 | CG32302 | 10.11247633 | 0.051919333 | 194.7728463 |
| 7 | I14 | 25095 | CG5125  | 11.724348   | 0.039956667 | 293.4265788 |
| 7 | I15 | 25160 | CG14439 | 10.31802267 | 0.038067667 | 271.0442633 |
| 7 | I16 | 19145 | CG3916  | 12.35191633 | 0.043465667 | 284.1763921 |
| 7 | I17 | 25156 | CG13691 | 9.684324667 | 0.047458    | 204.0609521 |
| 7 | I18 | 19137 | CG3726  | 6.190181    | 0.040592667 | 152.4950566 |
| 7 | I19 | 25150 | CG14505 | 10.990952   | 0.040754333 | 269.687935  |
| 7 | I20 | 19144 | CG3885  | 10.445286   | 0.044657    | 233.9003068 |
| 7 | I21 | 25165 | CG13575 | 9.365377667 | 0.044288    | 211.4653556 |
| 7 | I22 | 19178 | CG3827  | 9.873829667 | 0.038094    | 259.1964526 |
| 7 | I23 | 25169 | CG13759 | 8.185547    | 0.041472    | 197.3752652 |
| 7 | I24 | 19142 | CG3812  | 12.63017133 | 0.041546333 | 304.00207   |
| 7 | J01 | 19134 | CG3941  | 13.749623   | 0.064203333 | 214.1574633 |
| 7 | J02 | 26876 | CG11399 | 6.688294667 | 0.045678333 | 146.4216003 |
| 7 | J03 | 19126 | CG4103  | 8.499589667 | 0.051070667 | 166.4280148 |
| 7 | J04 | 26877 | CG11522 | 0.766448    | 0.028929333 | 26.49380099 |
| 7 | J05 | 19147 | CG4017  | 9.879397    | 0.064571    | 153.0005266 |
| 7 | J06 | 26886 | CG10655 | 8.530102667 | 0.052293333 | 163.1202703 |
| 7 | J07 | 19148 | CG4054  | 9.337239667 | 0.051842667 | 180.1072411 |
| 7 | J08 | 26890 | CG11654 | 7.622505    | 0.048393    | 157.5125535 |
| 7 | J09 | 19140 | CG4206  | 7.30516     | 0.040382333 | 180.8998985 |
| 7 | J10 | 26785 | CG32210 | 10.15014033 | 0.058048333 | 174.8567056 |
| 7 | J11 | 26860 | CG10542 | 7.748437667 | 0.048903667 | 158.4428775 |
| 7 | J12 | 26789 | CG10072 | 9.450917333 | 0.049277    | 191.791654  |
| 7 | J13 | 26881 | CG10413 | 12.05666067 | 0.054853667 | 219.7968048 |
| 7 | J14 | 26780 | CG10126 | 9.927014667 | 0.04522     | 219.5270824 |
| 7 | J15 | 26882 | CG10449 | 6.244493333 | 0.058898333 | 106.0215626 |
| 7 | J16 | 26779 | CG9166  | 12.39895033 | 0.046471667 | 266.8066636 |
| 7 | J17 | 26880 | CG10370 | 0.749181333 | 0.016793333 | 44.61183009 |

|   |     |       |                 |             |             |             |
|---|-----|-------|-----------------|-------------|-------------|-------------|
| 7 | J18 | 26784 | CG9232          | 12.714323   | 0.045386    | 280.1375534 |
| 7 | J19 | 26883 | CG30390         | 14.15271433 | 0.049432333 | 286.3048005 |
| 7 | J20 | 26787 | CG9319          | 12.70601267 | 0.040020667 | 317.4862821 |
| 7 | J21 | 26827 | CG10237         | 13.623579   | 0.057768333 | 235.8312628 |
| 7 | J22 | 26795 | CG9201          | 9.942051667 | 0.048101333 | 206.6897314 |
| 7 | J23 | 26891 | CG10327         | 10.923867   | 0.0393      | 277.9609924 |
| 7 | J24 | 26798 | CG9300          | 6.974029    | 0.046822667 | 148.9455748 |
| 7 | K02 | 25074 | CG4005          | 13.64414    | 0.070522    | 193.473526  |
| 7 | K03 | 28063 | CG6570          | 1.380837333 | 0.082726    | 16.69169709 |
| 7 | K04 | 25073 | CG2079          | 19.51894333 | 0.060428333 | 323.0097912 |
| 7 | K05 | 28059 | CG6305          | 18.71398667 | 0.059664    | 313.6562528 |
| 7 | K06 | 25047 | CG4244          | 15.58492333 | 0.074199667 | 210.0403416 |
| 7 | K07 | 25161 | CG13502         | 16.31924333 | 0.048850333 | 334.0661613 |
| 7 | K08 | 25066 | CG7761          | 12.77883    | 0.067352667 | 189.730127  |
| 7 | K09 | 25166 | CG13625         | 15.64655333 | 0.061410333 | 254.7869794 |
| 7 | K1  | 28039 | CG12217         | 11.63649    | 0.060577    | 192.0941942 |
| 7 | K10 | 25089 | CG17960         | 13.35849333 | 0.060329333 | 221.4261719 |
| 7 | K11 | 25167 | CG13662         | 11.86148833 | 0.055901333 | 212.1861434 |
| 7 | K12 | 25052 | CG6742          | 11.89789    | 0.064411667 | 184.7163816 |
| 7 | K13 | 25170 | CG13806         | 13.30233    | 0.05587     | 238.0943261 |
| 7 | K14 | 25067 | CG2160          | 12.55853    | 0.051764333 | 242.609712  |
| 7 | K15 | 25172 | CG14441         | 10.39086567 | 0.052041667 | 199.6643523 |
| 7 | K16 | 19157 | CG3921          | 12.43889667 | 0.051732667 | 240.4456887 |
| 7 | K17 | 25171 | CG14406         | 13.48071333 | 0.050784667 | 265.448495  |
| 7 | K18 | 19149 | CG3734          | 12.22784    | 0.049795667 | 245.5603232 |
| 7 | K19 | 25123 | CG13837,CG17121 | 14.87488    | 0.059161    | 251.4305032 |
| 7 | K20 | 19156 | CG3886          | 15.35766667 | 0.053291333 | 288.1831943 |
| 7 | K21 | 25177 | CG13581         | 13.93220667 | 0.042526667 | 327.6110676 |
| 7 | K22 | 19165 | CG3769          | 12.98141    | 0.040177    | 323.1055081 |
| 7 | K23 | 25181 | CG31637         | 13.50213    | 0.050701667 | 266.3054469 |
| 7 | K24 | 19154 | CG3817          | 9.374684333 | 0.046402    | 202.0319024 |
| 7 | L01 | 19146 | CG3942          | 18.03591667 | 0.077521667 | 232.6564616 |
| 7 | L02 | 26888 | CG11414         | 16.94653333 | 0.065055333 | 260.4941434 |
| 7 | L03 | 19138 | CG4105          | 16.45501667 | 0.069990333 | 235.1041334 |
| 7 | L04 | 26889 | CG11526         | 3.125342333 | 0.072521333 | 43.09548914 |
| 7 | L05 | 19159 | CG4020          | 13.84423333 | 0.063429    | 218.2634652 |
| 7 | L06 | 26898 | CG10664         | 7.485658    | 0.048204    | 155.2912206 |
| 7 | L07 | 19160 | CG4061          | 15.28902667 | 0.057721667 | 264.8750036 |
| 7 | L08 | 26897 | CG10621         | 13.61174333 | 0.057639    | 236.1550917 |
| 7 | L09 | 19152 | CG15899         | 12.19477333 | 0.056905    | 214.3005594 |
| 7 | L10 | 26797 | CG9270          | 11.87235633 | 0.057391    | 206.8679119 |
| 7 | L11 | 26872 | CG10555         | 15.72163333 | 0.050737667 | 309.8611814 |
| 7 | L12 | 26801 | CG30387         | 13.75822333 | 0.055739667 | 246.8300253 |
| 7 | L13 | 26893 | CG10414         | 14.04763    | 0.045669667 | 307.592129  |
| 7 | L14 | 26792 | CG10131         | 10.71092467 | 0.048776333 | 219.5926576 |
| 7 | L15 | 26894 | CG30286         | 12.88643    | 0.049271333 | 261.5401112 |
| 7 | L16 | 26791 | CG9169          | 13.95952667 | 0.048137667 | 289.9917597 |
| 7 | L17 | 26892 | CG10210,CG10375 | 12.83540333 | 0.046625    | 275.2901519 |
| 7 | L18 | 26796 | CG9242          | 12.91258    | 0.049189667 | 262.5059464 |
| 7 | L19 | 26908 | CG10583         | 11.27834667 | 0.056786333 | 198.610229  |
| 7 | L20 | 26812 | CG10038         | 13.00314667 | 0.048217333 | 269.6778475 |
| 7 | L21 | 26839 | CG10240         | 16.97291333 | 0.046065333 | 368.4530667 |
| 7 | L22 | 26807 | CG9204          | 16.35226667 | 0.053707667 | 304.4680151 |
| 7 | L23 | 26920 | CG10590         | 13.80572667 | 0.042366333 | 325.8655064 |



|   |     |       |                 |             |             |             |
|---|-----|-------|-----------------|-------------|-------------|-------------|
| 7 | L24 | 26814 | CG10118         | 13.12087    | 0.047463    | 276.4441776 |
| 7 | M01 | 28050 | CG15387         | 13.74843667 | 0.064639667 | 212.6934957 |
| 7 | M02 | 25086 | CG4132          | 13.42926667 | 0.066972333 | 200.5196176 |
| 7 | M03 | 28049 | CG5874          | 14.18698667 | 0.059647333 | 237.8477943 |
| 7 | M04 | 25085 | CG2210          | 13.59685667 | 0.055368667 | 245.5695159 |
| 7 | M05 | 28071 | CG6891          | 11.34955    | 0.051997    | 218.2731696 |
| 7 | M06 | 25068 | CG30388         | 6.207545667 | 0.050078    | 123.9575396 |
| 7 | M07 | 25173 | CG13506         | 13.50278333 | 0.059684667 | 226.2353815 |
| 7 | M08 | 25078 | CG7765          | 10.36815333 | 0.058107333 | 178.4310644 |
| 7 | M09 | 25178 | CG13633         | 11.35690933 | 0.051318333 | 221.30316   |
| 7 | M10 | 25087 | CG6292          | 2.185180333 | 0.035274333 | 61.94816817 |
| 7 | M11 | 25179 | CG13667,CG7161  | 13.28899    | 0.052616333 | 252.5639694 |
| 7 | M12 | 25082 | CG2534          | 14.98881667 | 0.055033333 | 272.3588734 |
| 7 | M13 | 25182 | CG13813         | 14.51956667 | 0.058231333 | 249.3428509 |
| 7 | M14 | 19095 | CG3839          | 14.65188667 | 0.049477    | 296.1353087 |
| 7 | M15 | 25184 | CG14443         | 13.6922     | 0.046813    | 292.4871296 |
| 7 | M16 | 19169 | CG3924          | 6.159151667 | 0.070934667 | 86.82851356 |
| 7 | M17 | 25180 | CG32183         | 15.59543667 | 0.05246     | 297.2824374 |
| 7 | M18 | 19161 | CG3739          | 14.19404333 | 0.048579    | 292.1847575 |
| 7 | M19 | 25135 | CG14387         | 15.07154667 | 0.044838333 | 336.1308404 |
| 7 | M20 | 19168 | CG3896          | 15.26045333 | 0.041571333 | 367.0907837 |
| 7 | M21 | 25189 | CG30169         | 15.85527333 | 0.046907    | 338.0150795 |
| 7 | M22 | 19177 | CG3774          | 13.1504     | 0.046343    | 283.7623805 |
| 7 | M23 | 25193 | CG13778         | 13.06055    | 0.051439667 | 253.9003622 |
| 7 | M24 | 19166 | CG3822          | 13.31500667 | 0.045672333 | 291.5333134 |
| 7 | N01 | 19158 | CG3953          | 18.89685    | 0.088263    | 214.0970735 |
| 7 | N02 | 26900 | CG11418         | 11.26022467 | 0.068591    | 164.1647544 |
| 7 | N03 | 19175 | CG4183          | 16.84494667 | 0.074277667 | 226.7834656 |
| 7 | N04 | 26901 | CG11537         | 12.52504667 | 0.065143    | 192.2700316 |
| 7 | N05 | 19171 | CG33138         | 14.57781333 | 0.061585    | 236.7104544 |
| 7 | N06 | 26910 | CG10669         | 15.37688    | 0.064141667 | 239.7330908 |
| 7 | N07 | 19172 | CG4078          | 16.63649333 | 0.060004    | 277.2564051 |
| 7 | N08 | 26914 | CG11670         | 13.37514333 | 0.065640333 | 203.7640983 |
| 7 | N09 | 19164 | CG4258          | 10.114722   | 0.055720333 | 181.5265881 |
| 7 | N10 | 26809 | CG9273          | 17.37991333 | 0.075889667 | 229.0155445 |
| 7 | N11 | 26863 | CG10267         | 16.04914333 | 0.060442333 | 265.5281894 |
| 7 | N12 | 26813 | CG10075,CG9948  | 14.60996333 | 0.054431667 | 268.4092593 |
| 7 | N13 | 26905 | CG10415         | 17.8868     | 0.055826667 | 320.3988536 |
| 7 | N14 | 26804 | CG10137,CG10165 | 14.76556667 | 0.062166    | 237.5183648 |
| 7 | N15 | 26906 | CG10479         | 14.54744    | 0.053884    | 269.9769876 |
| 7 | N16 | 26740 | CG9330          | 13.73029    | 0.047054667 | 291.7944377 |
| 7 | N17 | 26904 | CG10382         | 16.40961667 | 0.047257333 | 347.2395819 |
| 7 | N18 | 26808 | CG9244          | 12.8788     | 0.047027    | 273.8596976 |
| 7 | N19 | 26907 | CG10514         | 15.09661333 | 0.054061    | 279.2514629 |
| 7 | N20 | 26811 | CG9324          | 1.657443667 | 0.022894667 | 72.39431309 |
| 7 | N21 | 26911 | CG10284         | 15.49234667 | 0.049482    | 313.0905514 |
| 7 | N22 | 26819 | CG9212          | 14.17031    | 0.044938    | 315.3302328 |
| 7 | N23 | 26915 | CG10333         | 13.63424667 | 0.061379    | 222.1321082 |
| 7 | N24 | 26822 | CG9310          | 7.501562667 | 0.042369    | 177.053097  |
| 7 | O01 | 28070 | CG15705         | 10.484498   | 0.070743    | 148.2054479 |
| 7 | O02 | 25098 | CG4200          | 16.20984    | 0.070927333 | 228.541512  |
| 7 | O03 | 28061 | CG6824          | 12.44690667 | 0.066300333 | 187.735205  |
| 7 | O04 | 25044 | CG3917          | 8.291352333 | 0.059459667 | 139.4449851 |
| 7 | O05 | 25159 | CG14398         | 11.76442333 | 0.060065333 | 195.860452  |

|   |     |       |                 |             |             |             |
|---|-----|-------|-----------------|-------------|-------------|-------------|
| 7 | O06 | 25096 | CG7486          | 14.35446333 | 0.062009667 | 231.48751   |
| 7 | O07 | 25185 | CG13526         | 12.00680467 | 0.062579    | 191.8663556 |
| 7 | O08 | 25090 | CG7794          | 13.95001    | 0.058724333 | 237.5507598 |
| 7 | O09 | 25190 | CG13646         | 11.05011667 | 0.051639667 | 213.9850503 |
| 7 | O10 | 25099 | CG6303          | 8.739045    | 0.056351667 | 155.0805063 |
| 7 | O11 | 25191 | CG32369         | 12.53442333 | 0.054454667 | 230.1808844 |
| 7 | O12 | 25076 | CG6831          | 12.92819    | 0.047337667 | 273.105772  |
| 7 | O13 | 25194 | CG13822         | 13.34443667 | 0.060277667 | 221.3827675 |
| 7 | O14 | 19107 | CG3842          | 13.24897667 | 0.060067333 | 220.5687506 |
| 7 | O15 | 25196 | CG14457         | 14.27627333 | 0.046983    | 303.8604034 |
| 7 | O16 | 19181 | CG3929          | 12.67773    | 0.047890333 | 264.7241963 |
| 7 | O17 | 25192 | CG13744         | 8.863962667 | 0.045948667 | 192.9101171 |
| 7 | O18 | 19143 | CG3853          | 14.39600333 | 0.046987333 | 306.3805139 |
| 7 | O19 | 25147 | CG31345         | 14.90501667 | 0.047057667 | 316.7393907 |
| 7 | O20 | 19180 | CG3897          | 13.09621    | 0.047181667 | 277.5698894 |
| 7 | O21 |       | wts             | 59.73385    | 0.040878    | 1461.271344 |
| 7 | O22 |       | HFA17794        | 1.344875    | 0.011805667 | 113.9177514 |
| 7 | O23 |       | hpo             | 37.78098667 | 0.041176667 | 917.5338784 |
| 7 | O24 |       | Luc             | 1.860514333 | 0.046522333 | 39.99185338 |
| 7 | P01 | 19163 | CG4167          | 13.13213667 | 0.075753667 | 173.353149  |
| 7 | P02 | 26912 | CG11430         | 16.71904333 | 0.053040667 | 315.2117872 |
| 7 | P03 | 19162 | CG4109          | 7.917367333 | 0.065158    | 121.5102878 |
| 7 | P04 | 26913 | CG32593         | 10.88058    | 0.088647    | 122.7405327 |
| 7 | P05 | 19183 | CG4039          | 11.75463067 | 0.068552667 | 171.4686129 |
| 7 | P06 | 26922 | CG11353         | 13.35487667 | 0.074726333 | 178.7171412 |
| 7 | P07 | 19184 | CG4083          | 5.561696    | 0.056857667 | 97.8178727  |
| 7 | P08 | 26909 | CG10622         | 14.4495     | 0.064680333 | 223.3986632 |
| 7 | P09 | 19176 | CG4259          | 12.82003    | 0.058747333 | 218.2231818 |
| 7 | P10 | 26821 | CG14098,CG32210 | 12.88645    | 0.053277667 | 241.8733929 |
| 7 | P11 | 26896 | CG10576         | 13.41355333 | 0.054688333 | 245.2726663 |
| 7 | P12 | 26766 | CG10103         | 12.06633    | 0.050995667 | 236.6148104 |
| 7 | P13 | 26917 | CG10419         | 13.35650667 | 0.051315    | 260.2846471 |
| 7 | P14 | 26778 | CG32394         | 9.724317333 | 0.056792333 | 171.2258814 |
| 7 | P15 | 26918 | CG10480         | 19.16989333 | 0.056397667 | 339.9057881 |
| 7 | P16 | 26815 | CG31912,CG9171  | 13.00770333 | 0.055454    | 234.5674493 |
| 7 | P17 | 26875 | CG10272         | 16.03173333 | 0.065429    | 245.024887  |
| 7 | P18 | 26776 | CG10007         | 13.79673    | 0.046608667 | 296.0121151 |
| 7 | P19 | 26887 | CG10275         | 13.86270333 | 0.045883    | 302.1315811 |
| 7 | P20 | 26823 | CG9327          | 2.258147    | 0.024088333 | 93.74442676 |
| 7 | P21 |       | wts             | 58.58787    | 0.033544333 | 1746.580247 |
| 7 | P22 |       | HFA17794        | 1.255612    | 0.011585    | 108.3825637 |
| 7 | P23 |       | hpo             | 42.38821    | 0.036392333 | 1164.756588 |
| 7 | P24 |       | Luc             | 1.762271667 | 0.048062    | 36.66663199 |
| 8 | A01 |       | DIAP1           | 0.586926667 | 0.009846    | 59.610671   |
| 8 | A02 |       | ex/ft           | 49.62959667 | 0.056029667 | 885.7735485 |
| 8 | A03 |       | Luc             | 2.030397333 | 0.064862    | 31.30334145 |
| 8 | A04 |       | hpo             | 40.96359667 | 0.049157    | 833.3217378 |
| 8 | A05 | 26817 | CG10194         | 14.02853667 | 0.060326667 | 232.5428777 |
| 8 | A06 | 26641 | CG8786          | 13.30597033 | 0.057297    | 232.2280457 |
| 8 | A07 | 26544 | CG10367         | 10.396546   | 0.067858    | 153.2103216 |
| 8 | A08 | 26643 | CG8882          | 3.158301333 | 0.070561667 | 44.75944918 |
| 8 | A09 | 26541 | CG12858         | 14.92439333 | 0.062189667 | 239.9818834 |
| 8 | A10 | 26645 | CG8965          | 16.55201667 | 0.064104    | 258.2056762 |
| 8 | A11 | 26539 | CG10121         | 16.47361667 | 0.064920667 | 253.7499615 |

|   |     |       |         |             |             |             |
|---|-----|-------|---------|-------------|-------------|-------------|
| 8 | A12 | 26646 | CG8994  | 13.41029333 | 0.056680333 | 236.5951741 |
| 8 | A13 | 26546 | CG10638 | 13.66538    | 0.057585333 | 237.3066058 |
| 8 | A14 | 26638 | CG31650 | 12.24686333 | 0.055041667 | 222.5016805 |
| 8 | A15 | 26545 | CG10516 | 14.284      | 0.050760333 | 281.4008314 |
| 8 | A16 | 26642 | CG8830  | 8.510656333 | 0.047182667 | 180.3767556 |
| 8 | A17 | 26550 | CG11887 | 13.64916667 | 0.041366667 | 329.9556809 |
| 8 | A18 | 26644 | CG33067 | 14.56626333 | 0.044313667 | 328.7081487 |
| 8 | A19 | 26543 | CG10277 | 13.17009    | 0.045963667 | 286.5326236 |
| 8 | A20 | 26637 | CG9066  | 14.11721    | 0.041512    | 340.0753999 |
| 8 | A21 | 26547 | CG11471 | 8.667685    | 0.053228333 | 162.8396844 |
| 8 | A22 | 21173 | CG7228  | 10.91191    | 0.042946667 | 254.0804874 |
| 8 | A23 | 26635 | CG14220 | 5.014128667 | 0.04197     | 119.4693511 |
| 8 | A24 | 21189 | CG7259  | 14.90147    | 0.047688667 | 312.474033  |
| 8 | B01 |       | DIAP1   | 33.78638667 | 0.127561667 | 264.8631642 |
| 8 | B02 |       | ex/ft   | 34.43449333 | 0.091320333 | 377.0736711 |
| 8 | B03 |       | Luc     | 1.969652333 | 0.068608667 | 28.70850621 |
| 8 | B04 |       | hpo     | 34.02431667 | 0.055128667 | 617.180112  |
| 8 | B05 | 21180 | CG7383  | 11.361371   | 0.064703    | 175.5926464 |
| 8 | B06 | 18716 | CG13329 | 7.763276667 | 0.071165333 | 109.0878986 |
| 8 | B07 | 21181 | CG7423  | 13.34941333 | 0.055484667 | 240.5964411 |
| 8 | B08 | 18713 | CG31741 | 15.99176333 | 0.068273333 | 234.2314715 |
| 8 | B09 | 21182 | CG8072  | 14.10257333 | 0.071877333 | 196.2033464 |
| 8 | B10 | 18714 | CG7831  | 11.47097667 | 0.070384333 | 162.9762779 |
| 8 | B11 | 21176 | CG8302  | 12.93836667 | 0.05051     | 256.1545569 |
| 8 | B12 | 18706 | CG5370  | 13.43025667 | 0.068084333 | 197.2591345 |
| 8 | B13 | 21175 | CG8246  | 15.52044333 | 0.057921667 | 267.9557448 |
| 8 | B14 | 22709 | CG4525  | 13.08953333 | 0.052559333 | 249.0429863 |
| 8 | B15 | 21195 | CG8117  | 12.30036333 | 0.057513667 | 213.8685298 |
| 8 | B16 | 22710 | CG17894 | 8.048557667 | 0.05394     | 149.2131566 |
| 8 | B17 | 18710 | CG9695  | 15.00228    | 0.048566667 | 308.900755  |
| 8 | B18 | 22711 | CG4622  | 7.885778333 | 0.051359    | 153.5422873 |
| 8 | B19 | 18711 | CG11579 | 12.42901667 | 0.048260333 | 257.5410448 |
| 8 | B20 | 22713 | CG4678  | 10.31887167 | 0.043392667 | 237.8022016 |
| 8 | B21 | 18709 | CG10522 | 8.380101667 | 0.047420667 | 176.7183436 |
| 8 | B22 | 22717 | CG4475  | 12.87311667 | 0.037501667 | 343.2678548 |
| 8 | B23 | 18712 | CG2092  | 7.212824    | 0.058261333 | 123.8012175 |
| 8 | B24 | 22712 | CG4651  | 1.398316    | 0.038874333 | 35.97016026 |
| 8 | C01 | 26733 | CG10160 | 10.98016033 | 0.066476    | 165.1748049 |
| 8 | C02 | 26636 | CG9030  | 11.30423267 | 0.047008    | 240.4746568 |
| 8 | C03 | 26746 | CG10207 | 7.029553    | 0.054514    | 128.9494992 |
| 8 | C04 | 26640 | CG8766  | 10.42589667 | 0.053734    | 194.0279277 |
| 8 | C05 | 26554 | CG13900 | 7.554728667 | 0.088030333 | 85.81960764 |
| 8 | C06 | 26653 | CG8790  | 12.51315667 | 0.058213333 | 214.9534471 |
| 8 | C07 | 26556 | CG10372 | 11.16497067 | 0.046628667 | 239.4443475 |
| 8 | C08 | 26655 | CG8885  | 10.60943833 | 0.050474333 | 210.1947194 |
| 8 | C09 | 26564 | CG12737 | 15.36095333 | 0.054144333 | 283.703804  |
| 8 | C10 | 26657 | CG8972  | 12.85684333 | 0.047760667 | 269.1931296 |
| 8 | C11 | 26551 | CG10144 | 12.29916567 | 0.044330333 | 277.4435639 |
| 8 | C12 | 26658 | CG8996  | 14.08445333 | 0.055375333 | 254.345256  |
| 8 | C13 | 26558 | CG10650 | 13.01931667 | 0.054855667 | 237.3376801 |
| 8 | C14 | 26650 | CG9119  | 13.62932667 | 0.042355667 | 321.782839  |
| 8 | C15 | 26557 | CG10550 | 13.06979733 | 0.041005    | 318.7366744 |
| 8 | C16 | 26654 | CG8839  | 14.90377667 | 0.044991    | 331.2612893 |
| 8 | C17 | 26584 | CG11660 | 10.79387967 | 0.04006     | 269.4428274 |

|   |     |       |                       |             |             |             |
|---|-----|-------|-----------------------|-------------|-------------|-------------|
| 8 | C18 | 26656 | CG8931                | 13.06006    | 0.035035333 | 372.768253  |
| 8 | C19 | 26555 | CG10281               | 11.57331333 | 0.026112333 | 443.2125305 |
| 8 | C20 | 26649 | CG9078                | 11.87346    | 0.039600667 | 299.8298008 |
| 8 | C21 | 26540 | CG12002               | 13.41910333 | 0.045455333 | 295.2151563 |
| 8 | C22 | 21185 | CG7229                | 13.21330667 | 0.039393    | 335.4227062 |
| 8 | C23 | 26647 | CG14224               | 14.94120333 | 0.034862667 | 428.5731633 |
| 8 | C24 | 21201 | CG7260                | 13.68231667 | 0.034711333 | 394.1743331 |
| 8 | D01 | 21196 | CG8166                | 13.77427667 | 0.05358     | 257.0786985 |
| 8 | D02 | 18715 | CG31048               | 12.1622     | 0.053070667 | 229.1699118 |
| 8 | D03 | 21191 | CG7331                | 14.4662     | 0.063283333 | 228.5941533 |
| 8 | D04 | 18708 | CG4799                | 13.15145    | 0.062422333 | 210.6850112 |
| 8 | D05 | 21192 | CG7384                | 10.87237667 | 0.065659667 | 165.5868392 |
| 8 | D06 | 18728 | CG9191                | 1.880699667 | 0.033004    | 56.98399184 |
| 8 | D07 | 21193 | CG7427                | 10.58608    | 0.04909     | 215.6463638 |
| 8 | D08 | 18725 | CG12789               | 13.05526333 | 0.045173667 | 289.0016307 |
| 8 | D09 | 21194 | CG8079                | 13.82199333 | 0.041832333 | 330.4141135 |
| 8 | D10 | 18791 | CG11561               | 12.52737333 | 0.048496333 | 258.3158864 |
| 8 | D11 | 21188 | CG8303                | 11.30123667 | 0.037831667 | 298.724261  |
| 8 | D12 | 18718 | CG10873               | 7.759860667 | 0.038877    | 199.6002949 |
| 8 | D13 | 21187 | CG8249                | 14.16693333 | 0.046732    | 303.152729  |
| 8 | D14 | 22721 | CG4528                | 15.22613333 | 0.071165333 | 213.9543598 |
| 8 | D15 | 21258 | CG8241                | 12.18746    | 0.076954    | 158.3733139 |
| 8 | D16 | 22722 | CG4581                | 14.21555333 | 0.044346333 | 320.5575809 |
| 8 | D17 | 18722 | CG1768                | 11.55690833 | 0.048536    | 238.1100283 |
| 8 | D18 | 22723 | CG4633                | 12.52624333 | 0.041473333 | 302.0312651 |
| 8 | D19 | 18723 | CG8856                | 13.71771    | 0.038943667 | 352.2449521 |
| 8 | D20 | 22725 | CG4679                | 11.155174   | 0.037156    | 300.2253741 |
| 8 | D21 | 18721 | CG7524                | 13.09759667 | 0.043645667 | 300.0892796 |
| 8 | D22 | 22729 | CG4476                | 12.81218    | 0.037409    | 342.4892406 |
| 8 | D23 | 18724 | CG1569                | 13.90717333 | 0.042045333 | 330.7661572 |
| 8 | D24 | 22724 | CG4658                | 12.49840933 | 0.034872333 | 358.4047335 |
| 8 | E01 | 26745 | CG10161               | 4.731038    | 0.063263667 | 74.78286115 |
| 8 | E02 | 26648 | CG9031                | 15.71325333 | 0.062102667 | 253.0205896 |
| 8 | E03 | 26758 | CG10211               | 16.06142    | 0.068346667 | 234.9993172 |
| 8 | E04 | 26652 | CG8768                | 13.87245333 | 0.063184    | 219.5564278 |
| 8 | E05 | 26566 | CG32479               | 13.6574     | 0.068716667 | 198.7494543 |
| 8 | E06 | 26665 | CG8791                | 15.49374333 | 0.060913333 | 254.3571741 |
| 8 | E07 | 26568 | CG10374               | 15.66588    | 0.066426667 | 235.837214  |
| 8 | E08 | 26667 | CG8888                | 15.73943667 | 0.058511    | 268.9996183 |
| 8 | E09 | 26565 | CG12891               | 16.09450333 | 0.062747333 | 256.4970092 |
| 8 | E10 | 26669 | CG32581,CG8974,CG8974 | 15.55999    | 0.055435667 | 280.6855394 |
| 8 | E11 | 26563 | CG10149               | 0.688519    | 0.017407    | 39.55414488 |
| 8 | E12 | 26670 | CG9008                | 16.89034667 | 0.053804333 | 313.9216792 |
| 8 | E13 | 26608 | CG11727               | 9.353563333 | 0.061095667 | 153.0970009 |
| 8 | E14 | 26662 | CG9122                | 13.80504    | 0.058296667 | 236.8066785 |
| 8 | E15 | 26569 | CG32434               | 15.92328667 | 0.054363667 | 292.9031032 |
| 8 | E16 | 26723 | CG8745                | 15.35392    | 0.059593333 | 257.6449267 |
| 8 | E17 | 26596 | CG11661               | 17.56017667 | 0.053076667 | 330.8455065 |
| 8 | E18 | 26668 | CG8933                | 16.59496667 | 0.046082333 | 360.1155902 |
| 8 | E19 | 26567 | CG10287               | 14.69966333 | 0.056861333 | 258.5177391 |
| 8 | E20 | 26661 | CG9081                | 17.70484667 | 0.047577667 | 372.1251568 |
| 8 | E21 | 26552 | CG12736               | 15.81324    | 0.044783333 | 353.1054708 |
| 8 | E22 | 21197 | CG7230                | 15.38401    | 0.045876333 | 335.3365206 |
| 8 | E23 | 26659 | CG8708                | 14.75038667 | 0.054514    | 270.5797899 |

|   |     |       |               |             |             |             |
|---|-----|-------|---------------|-------------|-------------|-------------|
| 8 | E24 | 21213 | CG7274,CG7280 | 4.609186333 | 0.037852333 | 121.7675617 |
| 8 | F01 | 21208 | CG8172        | 13.40657267 | 0.070637    | 189.7953292 |
| 8 | F02 | 18727 | CG10595       | 12.97426667 | 0.071892    | 180.4688514 |
| 8 | F03 | 21203 | CG7333        | 15.03457    | 0.06942     | 216.5740421 |
| 8 | F04 | 18720 | CG2637        | 10.29777367 | 0.048818333 | 210.9407053 |
| 8 | F05 | 21204 | CG7385        | 13.13241    | 0.076561    | 171.5287157 |
| 8 | F06 | 18740 | CG17256       | 13.00357067 | 0.069567333 | 186.9206428 |
| 8 | F07 | 21205 | CG7429        | 16.30681667 | 0.058452    | 278.9779078 |
| 8 | F08 | 18737 | CG9749        | 8.550114667 | 0.058996333 | 144.9262045 |
| 8 | F09 | 21206 | CG8089        | 14.45933    | 0.050882667 | 284.1700514 |
| 8 | F10 | 18738 | CG4012        | 12.34660333 | 0.072019    | 171.435362  |
| 8 | F11 | 21200 | CG8315        | 11.781837   | 0.049945667 | 235.8930771 |
| 8 | F12 | 18730 | CG4280        | 13.91063667 | 0.05508     | 252.5533164 |
| 8 | F13 | 21267 | CG32052       | 13.98931667 | 0.056267333 | 248.6223504 |
| 8 | F14 | 22733 | CG4533        | 13.44731667 | 0.049601333 | 271.1079675 |
| 8 | F15 | 21219 | CG8145        | 13.11772667 | 0.061591333 | 212.980073  |
| 8 | F16 | 22734 | CG4589        | 7.593783667 | 0.044380667 | 171.1056691 |
| 8 | F17 | 18734 | CG10155       | 15.53694    | 0.050445333 | 307.995586  |
| 8 | F18 | 22735 | CG33158       | 11.62305    | 0.059148667 | 196.5056975 |
| 8 | F19 | 18735 | CG18241       | 14.14119333 | 0.052006667 | 271.9111652 |
| 8 | F20 | 22737 | CG4685        | 14.91458    | 0.055590667 | 268.2928789 |
| 8 | F21 | 18733 | CG4032        | 28.0234     | 0.059015333 | 474.8494741 |
| 8 | F22 | 22741 | CG4477        | 15.63873    | 0.050735333 | 308.2413965 |
| 8 | F23 | 18736 | CG4654        | 2.088341    | 0.031927667 | 65.40850673 |
| 8 | F24 | 22736 | CG4659        | 6.779331667 | 0.041771667 | 162.2949767 |
| 8 | G01 | 26757 | CG10166       | 13.59805333 | 0.056711    | 239.778056  |
| 8 | G02 | 26663 | CG8729        | 16.89949333 | 0.061063333 | 276.7535346 |
| 8 | G03 | 26770 | CG10212       | 17.19255333 | 0.070739667 | 243.0397844 |
| 8 | G04 | 26664 | CG8772        | 19.65694333 | 0.056014667 | 350.9249363 |
| 8 | G05 | 26578 | CG14039       | 13.78643    | 0.049855    | 276.5305386 |
| 8 | G06 | 26677 | CG8801        | 6.441675333 | 0.063910333 | 100.7923914 |
| 8 | G07 | 26580 | CG32412       | 15.64397333 | 0.05033     | 310.8280019 |
| 8 | G08 | 26679 | CG8890        | 14.91296333 | 0.05257     | 283.6782068 |
| 8 | G09 | 26577 | CG32572       | 17.13322333 | 0.061846    | 277.0304196 |
| 8 | G10 | 26681 | CG8975        | 3.214639333 | 0.032708333 | 98.28196688 |
| 8 | G11 | 26575 | CG10192       | 18.61673667 | 0.049591    | 375.4055507 |
| 8 | G12 | 26682 | CG9014        | 16.32782333 | 0.048420333 | 337.2100564 |
| 8 | G13 | 26582 | CG11371       | 13.19075333 | 0.050653    | 260.4140591 |
| 8 | G14 | 26674 | CG9124        | 11.620487   | 0.067338    | 172.5695298 |
| 8 | G15 | 26581 | CG10582       | 5.409305    | 0.11193     | 48.3275708  |
| 8 | G16 | 26678 | CG8846        | 16.74518    | 0.050872    | 329.1629973 |
| 8 | G17 | 26586 | CG30019       | 16.16676667 | 0.041947333 | 385.4063031 |
| 8 | G18 | 26680 | CG8938        | 17.31205333 | 0.046025333 | 376.1418349 |
| 8 | G19 | 26632 | CG11796       | 19.60177    | 0.045439333 | 431.3833096 |
| 8 | G20 | 26721 | CG9104        | 18.91203333 | 0.042245667 | 447.6680054 |
| 8 | G21 | 26583 | CG1799        | 13.13576667 | 0.055613667 | 236.1967382 |
| 8 | G22 | 21209 | CG7233        | 18.84960667 | 0.042849333 | 439.9043159 |
| 8 | G23 | 26671 | CG8711        | 8.24527     | 0.034955    | 235.8824203 |
| 8 | G24 | 21225 | CG7277        | 15.72207    | 0.040522667 | 387.982117  |
| 8 | H01 | 21220 | CG8178        | 19.52390667 | 0.067870667 | 287.663399  |
| 8 | H02 | 18739 | CG4173        | 13.51928    | 0.053975    | 250.4729968 |
| 8 | H03 | 21215 | CG7343        | 16.44098    | 0.060385667 | 272.2662663 |
| 8 | H04 | 18732 | CG14226       | 11.040236   | 0.056568333 | 195.1663652 |
| 8 | H05 | 21216 | CG7386        | 10.84561967 | 0.053656333 | 202.1312116 |

|   |     |       |         |             |             |             |
|---|-----|-------|---------|-------------|-------------|-------------|
| 8 | H06 | 18752 | CG1258  | 11.119966   | 0.057771333 | 192.4824192 |
| 8 | H07 | 21217 | CG7431  | 16.66670333 | 0.049647667 | 335.6996301 |
| 8 | H08 | 18749 | CG11804 | 19.44541    | 0.056701667 | 342.9424767 |
| 8 | H09 | 21218 | CG8093  | 17.14784667 | 0.051841667 | 330.7734448 |
| 8 | H10 | 18750 | CG4379  | 13.54208    | 0.043656    | 310.1997434 |
| 8 | H11 | 21212 | CG8319  | 15.45073333 | 0.053867    | 286.8311458 |
| 8 | H12 | 18742 | CG2727  | 17.57604    | 0.061506    | 285.7613891 |
| 8 | H13 | 21211 | CG8271  | 16.94389    | 0.047797333 | 354.4944627 |
| 8 | H14 | 22745 | CG4538  | 16.79861    | 0.049682    | 338.1226601 |
| 8 | H15 | 21231 | CG8147  | 13.62116333 | 0.046857333 | 290.6943773 |
| 8 | H16 | 22746 | CG4592  | 11.89489367 | 0.037135    | 320.3148961 |
| 8 | H17 | 18746 | CG31536 | 17.92788    | 0.047951333 | 373.8765693 |
| 8 | H18 | 22747 | CG31365 | 17.39858667 | 0.039685    | 438.4172021 |
| 8 | H19 | 18747 | CG3068  | 8.736805333 | 0.046063333 | 189.6694117 |
| 8 | H20 | 22749 | CG31052 | 14.07481333 | 0.043182    | 325.9416732 |
| 8 | H21 | 18745 | CG10540 | 35.20935333 | 0.04347     | 809.9690208 |
| 8 | H22 | 22753 | CG4484  | 16.22251333 | 0.042130667 | 385.0523767 |
| 8 | H23 | 18748 | CG7413  | 19.46684333 | 0.046111667 | 422.1674197 |
| 8 | H24 | 22748 | CG4662  | 15.07034667 | 0.038252667 | 393.9685251 |
| 8 | I01 | 26769 | CG10171 | 14.57934    | 0.068930333 | 211.5083345 |
| 8 | I02 | 26675 | CG8730  | 7.458389667 | 0.064183667 | 116.2038577 |
| 8 | I03 | 26782 | CG10220 | 10.030121   | 0.073752667 | 135.9967233 |
| 8 | I04 | 26687 | CG8733  | 15.38210333 | 0.067863333 | 226.66295   |
| 8 | I05 | 26590 | CG14183 | 13.72650333 | 0.062310667 | 220.2913894 |
| 8 | I06 | 26689 | CG8811  | 11.44396333 | 0.052771    | 216.860839  |
| 8 | I07 | 26592 | CG10494 | 10.90642133 | 0.056878333 | 191.7500161 |
| 8 | I08 | 26691 | CG8905  | 14.80983667 | 0.056561    | 261.8383103 |
| 8 | I09 | 26589 | CG13089 | 17.33975333 | 0.066136667 | 262.1806361 |
| 8 | I10 | 26693 | CG8977  | 7.598764333 | 0.069233667 | 109.7553358 |
| 8 | I11 | 26587 | CG10198 | 4.373657333 | 0.03699     | 118.2389114 |
| 8 | I12 | 26694 | CG9020  | 10.02065467 | 0.061377    | 163.2640023 |
| 8 | I13 | 26594 | CG11375 | 8.19006     | 0.061844667 | 132.4295277 |
| 8 | I14 | 26686 | CG9127  | 14.61283333 | 0.055019333 | 265.5945183 |
| 8 | I15 | 26549 | CG11840 | 14.00072333 | 0.048852333 | 286.592725  |
| 8 | I16 | 26690 | CG8850  | 13.90107333 | 0.046975    | 295.9249246 |
| 8 | I17 | 26598 | CG11943 | 9.668720667 | 0.049200333 | 196.5173813 |
| 8 | I18 | 26720 | CG9063  | 13.09372333 | 0.049837333 | 262.7292124 |
| 8 | I19 | 26591 | CG10315 | 12.78192667 | 0.038582667 | 331.2867609 |
| 8 | I20 | 26685 | CG9092  | 14.23892333 | 0.040019333 | 355.8011128 |
| 8 | I21 | 26595 | CG11486 | 14.51061667 | 0.042921333 | 338.0746948 |
| 8 | I22 | 21221 | CG7234  | 12.04494667 | 0.044916333 | 268.164068  |
| 8 | I23 | 26683 | CG8714  | 14.33051667 | 0.045184333 | 317.1567579 |
| 8 | I24 | 21237 | CG7279  | 13.78183333 | 0.039108667 | 352.3984454 |
| 8 | J01 | 21232 | CG8182  | 15.01960667 | 0.074246333 | 202.2942547 |
| 8 | J02 | 18767 | CG2411  | 13.97612667 | 0.064037667 | 218.2485308 |
| 8 | J03 | 21227 | CG7351  | 17.31475667 | 0.080750333 | 214.423346  |
| 8 | J04 | 18779 | CG6054  | 14.58233333 | 0.063982333 | 227.9118715 |
| 8 | J05 | 21228 | CG7395  | 15.11167    | 0.058984    | 256.1994778 |
| 8 | J06 | 18764 | CG1395  | 0.377414667 | 0.017871    | 21.11883312 |
| 8 | J07 | 21229 | CG7432  | 13.11333333 | 0.061682333 | 212.5946381 |
| 8 | J08 | 18761 | CG10971 | 15.37487333 | 0.058632    | 262.2266567 |
| 8 | J09 | 21230 | CG8094  | 13.81643667 | 0.051034333 | 270.7282679 |
| 8 | J10 | 18762 | CG5169  | 9.707825667 | 0.060139667 | 161.4213414 |
| 8 | J11 | 21262 | CG7322  | 14.74194    | 0.051381333 | 286.9123677 |

|   |     |       |         |             |             |             |
|---|-----|-------|---------|-------------|-------------|-------------|
| 8 | J12 | 18754 | CG4237  | 14.74961667 | 0.058419667 | 252.4769056 |
| 8 | J13 | 21223 | CG8273  | 16.5387     | 0.05232     | 316.1066514 |
| 8 | J14 | 22757 | CG4546  | 12.29480667 | 0.047153    | 260.7428301 |
| 8 | J15 | 18705 | CG7893  | 24.70455    | 0.059987667 | 411.8271534 |
| 8 | J16 | 22758 | CG4594  | 14.33652    | 0.050139333 | 285.9335984 |
| 8 | J17 | 18758 | CG10443 | 15.27556667 | 0.049481333 | 308.7137237 |
| 8 | J18 | 22759 | CG4643  | 15.20098667 | 0.04621     | 328.9544832 |
| 8 | J19 | 18759 | CG4274  | 3.684531667 | 0.023497667 | 156.8041508 |
| 8 | J20 | 22761 | CG4700  | 14.21996667 | 0.054797    | 259.5026492 |
| 8 | J21 | 18757 | CG12235 | 14.41071667 | 0.049382333 | 291.8192741 |
| 8 | J22 | 22765 | CG4495  | 13.61142333 | 0.044215333 | 307.8439606 |
| 8 | J23 | 18760 | CG6975  | 15.99567333 | 0.044019    | 363.3811157 |
| 8 | J24 | 22760 | CG4663  | 14.02175667 | 0.042076667 | 333.2430484 |
| 8 | K02 | 26684 | CG9042  | 11.7822     | 0.072695    | 162.0771717 |
| 8 | K03 | 26794 | CG10223 | 13.17332667 | 0.067532    | 195.0679184 |
| 8 | K04 | 26688 | CG8774  | 31.45602333 | 0.122380333 | 257.0349539 |
| 8 | K05 | 26609 | CG11876 | 14.57030667 | 0.072987667 | 199.6269689 |
| 8 | K06 | 26701 | CG8815  | 17.02059333 | 0.062774    | 271.140812  |
| 8 | K07 | 26604 | CG10508 | 1.205178    | 0.057937333 | 20.80140612 |
| 8 | K08 | 26703 | CG8907  | 11.65648467 | 0.061728667 | 188.8342207 |
| 8 | K09 | 26601 | CG13101 | 13.81214333 | 0.062156333 | 222.2161861 |
| 8 | K1  | 26781 | CG10175 | 12.92970333 | 0.056231    | 229.9390609 |
| 8 | K10 | 26705 | CG8979  | 8.237296    | 0.046902667 | 175.6253234 |
| 8 | K11 | 26548 | CG11567 | 11.93152333 | 0.057053333 | 209.1292942 |
| 8 | K12 | 26706 | CG9021  | 12.73318333 | 0.061491    | 207.0739349 |
| 8 | K13 | 26606 | CG11376 | 11.19982233 | 0.050186    | 223.1662681 |
| 8 | K14 | 26698 | CG9135  | 13.97638    | 0.049201667 | 284.0631415 |
| 8 | K15 | 26605 | CG10602 | 12.50222    | 0.051119667 | 244.5677137 |
| 8 | K16 | 26702 | CG8858  | 12.75967333 | 0.050733    | 251.5063831 |
| 8 | K17 | 26610 | CG11964 | 13.21738533 | 0.059362333 | 222.6560951 |
| 8 | K18 | 26704 | CG8947  | 11.44863667 | 0.052095333 | 219.7631906 |
| 8 | K19 | 26603 | CG10345 | 14.20695333 | 0.051838667 | 274.0609326 |
| 8 | K20 | 21190 | CG7297  | 10.94219667 | 0.051394667 | 212.905295  |
| 8 | K21 | 26639 | CG8725  | 8.416610333 | 0.040919    | 205.6895411 |
| 8 | K22 | 21233 | CG31221 | 9.058062333 | 0.041799667 | 216.7017839 |
| 8 | K23 | 26695 | CG8717  | 14.44393333 | 0.052819    | 273.4609389 |
| 8 | K24 | 21249 | CG7280  | 12.75746333 | 0.046852    | 272.2928228 |
| 8 | L01 | 21244 | CG30471 | 14.07207    | 0.074675    | 188.4441915 |
| 8 | L02 | 18763 | CG12008 | 12.29739333 | 0.093244333 | 131.8835461 |
| 8 | L03 | 21186 | CG8211  | 24.89419    | 0.113852333 | 218.6533141 |
| 8 | L04 | 18756 | CG4257  | 7.983066    | 0.078474667 | 101.7279377 |
| 8 | L05 | 21240 | CG7409  | 11.21790867 | 0.064846333 | 172.9921815 |
| 8 | L06 | 18776 | CG6392  | 11.46601667 | 0.073966    | 155.0173954 |
| 8 | L07 | 21241 | CG7437  | 9.857187667 | 0.05871     | 167.8962301 |
| 8 | L08 | 18773 | CG10504 | 13.80014333 | 0.070386667 | 196.0618962 |
| 8 | L09 | 21242 | CG8100  | 13.36949667 | 0.059965333 | 222.9537622 |
| 8 | L10 | 18774 | CG1451  | 11.32554333 | 0.061068667 | 185.4558803 |
| 8 | L11 | 21236 | CG8328  | 12.15576    | 0.05309     | 228.9651535 |
| 8 | L12 | 18772 | CG18402 | 11.95223033 | 0.069988667 | 170.7737967 |
| 8 | L13 | 21222 | CG8219  | 12.30940333 | 0.05406     | 227.6989148 |
| 8 | L14 | 22769 | CG4548  | 13.93646333 | 0.053556    | 260.2222596 |
| 8 | L15 | 18789 | CG9774  | 8.156798333 | 0.057266667 | 142.4353609 |
| 8 | L16 | 22770 | CG4598  | 12.24901667 | 0.059361    | 206.3478827 |
| 8 | L17 | 18770 | CG4636  | 8.599924333 | 0.060654    | 141.7865983 |

|   |     |       |         |             |             |             |
|---|-----|-------|---------|-------------|-------------|-------------|
| 8 | L18 | 22771 | CG4644  | 10.18420067 | 0.053982667 | 188.6568652 |
| 8 | L19 | 18771 | CG17498 | 8.517442333 | 0.052947333 | 160.8663137 |
| 8 | L20 | 22773 | CG4703  | 10.93325333 | 0.047336667 | 230.96796   |
| 8 | L21 | 18769 | CG17158 | 29.52826333 | 0.048896667 | 603.891131  |
| 8 | L22 | 22777 | CG4501  | 11.51012    | 0.049015    | 234.8285219 |
| 8 | L23 | 18765 | CG10023 | 11.62126667 | 0.046833333 | 248.1409253 |
| 8 | L24 | 22772 | CG4673  | 6.380215    | 0.052645333 | 121.1924134 |
| 8 | M01 | 26793 | CG10184 | 15.09909    | 0.072444333 | 208.4233411 |
| 8 | M02 | 26696 | CG9060  | 13.61824    | 0.059048333 | 230.628694  |
| 8 | M03 | 26806 | CG10230 | 3.825858667 | 0.054148667 | 70.65471603 |
| 8 | M04 | 26700 | CG8777  | 17.42551667 | 0.058339    | 298.6941269 |
| 8 | M05 | 26614 | CG33075 | 14.62769667 | 0.064557667 | 226.5834164 |
| 8 | M06 | 26713 | CG8824  | 17.96253    | 0.060810333 | 295.386146  |
| 8 | M07 | 26616 | CG10510 | 16.95807667 | 0.060888333 | 278.5110996 |
| 8 | M08 | 26715 | CG8909  | 16.91804    | 0.072828    | 232.3013127 |
| 8 | M09 | 26613 | CG13164 | 17.63842333 | 0.054265333 | 325.0403573 |
| 8 | M10 | 26717 | CG8985  | 16.68309333 | 0.054322667 | 307.1110893 |
| 8 | M11 | 26560 | CG11594 | 18.41083667 | 0.064406667 | 285.8529655 |
| 8 | M12 | 26718 | CG9022  | 8.555302333 | 0.052428    | 163.181932  |
| 8 | M13 | 26618 | CG11397 | 17.56195667 | 0.080146    | 219.124556  |
| 8 | M14 | 26699 | CG8739  | 16.68887667 | 0.061594333 | 270.9482474 |
| 8 | M15 | 26573 | CG11861 | 15.35302333 | 0.054564    | 281.3764265 |
| 8 | M16 | 26714 | CG8863  | 34.50957    | 0.055653333 | 620.0809176 |
| 8 | M17 | 26622 | CG11970 | 16.62709333 | 0.084492    | 196.7889662 |
| 8 | M18 | 26716 | CG8952  | 15.46439333 | 0.045663667 | 338.658598  |
| 8 | M19 | 26612 | CG12785 | 8.735456333 | 0.058177    | 150.1530903 |
| 8 | M20 | 21226 | CG32542 | 15.58328    | 0.045986667 | 338.8651783 |
| 8 | M21 | 26651 | CG8727  | 19.11305333 | 0.051576    | 370.5803733 |
| 8 | M22 | 21245 | CG31175 | 18.89462667 | 0.053371    | 354.0242204 |
| 8 | M23 | 26707 | CG8721  | 15.67319333 | 0.044847333 | 349.4788245 |
| 8 | M24 | 21261 | CG7285  | 15.2467     | 0.048205667 | 316.2843926 |
| 8 | N01 | 21256 | CG8190  | 11.43757833 | 0.073488667 | 155.6373092 |
| 8 | N02 | 18775 | CG5490  | 15.76571667 | 0.072168333 | 218.4575414 |
| 8 | N03 | 21198 | CG30091 | 16.54155    | 0.071540333 | 231.2199179 |
| 8 | N04 | 18768 | CG10954 | 8.904078667 | 0.073873333 | 120.5317029 |
| 8 | N05 | 21252 | CG7411  | 15.53416667 | 0.068729667 | 226.0183618 |
| 8 | N06 | 18788 | CG5971  | 13.36714    | 0.064506667 | 207.2210624 |
| 8 | N07 | 21253 | CG7440  | 15.69141    | 0.060857    | 257.8406757 |
| 8 | N08 | 18743 | CG2125  | 15.77029333 | 0.050461    | 312.5243918 |
| 8 | N09 | 21254 | CG8102  | 18.41305333 | 0.061649667 | 298.6723908 |
| 8 | N10 | 18786 | CG13503 | 8.382491333 | 0.053333667 | 157.1707302 |
| 8 | N11 | 21248 | CG8337  | 15.73537333 | 0.049939333 | 315.0897756 |
| 8 | N12 | 18784 | CG4141  | 15.39436333 | 0.053704333 | 286.6503013 |
| 8 | N13 | 21234 | CG8221  | 19.06735    | 0.055085    | 346.1441409 |
| 8 | N14 | 22781 | CG4563  | 15.17654    | 0.057450667 | 264.1664733 |
| 8 | N15 | 18729 | CG5884  | 19.16248    | 0.055300667 | 346.5144483 |
| 8 | N16 | 22782 | CG4606  | 13.61847667 | 0.051612333 | 263.8608989 |
| 8 | N17 | 18782 | CG8978  | 8.937383667 | 0.058427333 | 152.965798  |
| 8 | N18 | 22783 | CG4645  | 11.39565    | 0.051933667 | 219.4270255 |
| 8 | N19 | 18783 | CG12306 | 3.966706    | 0.066046333 | 60.05944312 |
| 8 | N20 | 22785 | CG4705  | 18.79007333 | 0.054519667 | 344.6476195 |
| 8 | N21 | 18781 | CG5061  | 45.10162333 | 0.053709333 | 839.7353036 |
| 8 | N22 | 22789 | CG4511  | 16.90411333 | 0.046172    | 366.1117849 |
| 8 | N23 | 18777 | CG10295 | 15.28033    | 0.051673333 | 295.7101664 |



|   |     |       |                 |             |             |             |
|---|-----|-------|-----------------|-------------|-------------|-------------|
| 8 | N24 | 22796 | CG4675          | 18.32249333 | 0.046990333 | 389.9204801 |
| 8 | O01 | 26805 | CG10186         | 17.81820333 | 0.092529    | 192.5688523 |
| 8 | O02 | 26708 | CG9062          | 15.77894667 | 0.095994333 | 164.3737304 |
| 8 | O03 | 26816 | CG10142         | 15.26048667 | 0.087756333 | 173.8961291 |
| 8 | O04 | 26709 | CG9098          | 13.18747667 | 0.062095333 | 212.3746819 |
| 8 | O05 | 26633 | CG14513         | 29.37305667 | 0.056591667 | 519.0350169 |
| 8 | O06 | 26725 | CG8825          | 12.36080333 | 0.073208333 | 168.8442117 |
| 8 | O07 | 26588 | CG12750         | 7.690241    | 0.151829667 | 50.6504504  |
| 8 | O08 | 26727 | CG32561         | 11.81936    | 0.068167    | 173.3882964 |
| 8 | O09 | 26625 | CG13168         | 12.60216333 | 0.061241333 | 205.7787224 |
| 8 | O10 | 26729 | CG8988          | 12.89266667 | 0.073064667 | 176.4555599 |
| 8 | O11 | 26623 | CG10249         | 11.434329   | 0.061077667 | 187.2096566 |
| 8 | O12 | 26730 | CG9025          | 9.738421333 | 0.067166667 | 144.9889032 |
| 8 | O13 | 26630 | CG32628         | 12.99375    | 0.061744667 | 210.4432772 |
| 8 | O14 | 26722 | CG9148          | 14.29334333 | 0.053830667 | 265.5241746 |
| 8 | O15 | 26585 | CG30011         | 15.48595    | 0.061899333 | 250.1795927 |
| 8 | O16 | 26724 | CG8783          | 15.21638667 | 0.052625333 | 289.1456586 |
| 8 | O17 | 26600 | CG12781         | 13.19805667 | 0.054648    | 241.5103328 |
| 8 | O18 | 26728 | CG8956          | 13.74183667 | 0.050911    | 269.9188126 |
| 8 | O19 | 26627 | CG10366         | 15.29848    | 0.056965333 | 268.5577193 |
| 8 | O20 | 21214 | CG7304          | 14.65494667 | 0.048675    | 301.0774867 |
| 8 | O21 |       | wtg             | 65.56901333 | 0.039089667 | 1677.400165 |
| 8 | O22 |       | HFA17794        | 1.514504667 | 0.011421667 | 132.5992704 |
| 8 | O23 |       | hpo             | 36.58067333 | 0.044265    | 826.4017471 |
| 8 | O24 |       | Luc             | 1.789638    | 0.043177    | 41.44887324 |
| 8 | P01 | 21250 | CG7320          | 14.53832667 | 0.086727333 | 167.6325803 |
| 8 | P02 | 18787 | CG8789          | 13.75888333 | 0.079572    | 172.9111161 |
| 8 | P03 | 21255 | CG8155          | 11.95944    | 0.071136667 | 168.1192072 |
| 8 | P04 | 18796 | CG4006          | 10.41940667 | 0.070032333 | 148.7799445 |
| 8 | P05 | 21264 | CG7422          | 12.52362    | 0.067501333 | 185.5314463 |
| 8 | P06 | 18799 | CG8610          | 6.856729667 | 0.060043333 | 114.1963526 |
| 8 | P07 | 21265 | CG7446          | 12.34024667 | 0.061799    | 199.6835979 |
| 8 | P08 | 18755 | CG1708          | 12.6012     | 0.058452667 | 215.5795572 |
| 8 | P09 | 21246 | CG8237          | 12.57508333 | 0.065924667 | 190.7492896 |
| 8 | P10 | 18798 | CG15112         | 11.88418667 | 0.055981    | 212.2896459 |
| 8 | P11 | 21260 | CG8344          | 3.916930333 | 0.100446    | 38.99538392 |
| 8 | P12 | 18790 | CG10539,CG32415 | 11.16181567 | 0.049341    | 226.2178648 |
| 8 | P13 | 21259 | CG8299          | 11.69804    | 0.072419667 | 161.5312599 |
| 8 | P14 | 22793 | CG4569          | 12.57244333 | 0.054929667 | 228.882571  |
| 8 | P15 | 18741 | CG9900          | 13.85057667 | 0.062019333 | 223.3267583 |
| 8 | P16 | 22794 | CG4615          | 7.883417333 | 0.060637    | 130.0100159 |
| 8 | P17 | 18794 | CG1560          | 8.826481667 | 0.040888333 | 215.8679737 |
| 8 | P18 | 22795 | CG4648          | 12.66981    | 0.053631    | 236.2404207 |
| 8 | P19 | 18795 | CG4488          | 8.704137333 | 0.045260667 | 192.3112931 |
| 8 | P20 | 22797 | CG4707          | 14.68810333 | 0.048159667 | 304.9876453 |
| 8 | P21 |       | wtg             | 58.66606333 | 0.039229333 | 1495.464193 |
| 8 | P22 |       | HFA17794        | 1.291399333 | 0.012634667 | 102.2107957 |
| 8 | P23 |       | hpo             | 43.86782667 | 0.039284333 | 1116.674841 |
| 8 | P24 |       | Luc             | 2.048408667 | 0.049294667 | 41.55436694 |
| 9 | A01 |       | DIAP1           | 0.615125333 | 0.00925     | 66.50003604 |
| 9 | A02 |       | ex/ft           | 57.84475667 | 0.059307333 | 975.339025  |
| 9 | A03 |       | Luc             | 1.529989333 | 0.074403667 | 20.56335933 |
| 9 | A04 |       | hpo             | 41.36239    | 0.057443667 | 720.0513547 |
| 9 | A05 | 22714 | CG4717          | 11.72216667 | 0.069719667 | 168.1328559 |

|   |     |       |                |             |             |             |
|---|-----|-------|----------------|-------------|-------------|-------------|
| 9 | A06 | 18425 | CG4221         | 10.69891    | 0.065757333 | 162.7029178 |
| 9 | A07 | 22716 | CG4810         | 8.423201333 | 0.070847667 | 118.8917254 |
| 9 | A08 | 18426 | CG4241         | 14.17865667 | 0.059385333 | 238.756876  |
| 9 | A09 | 22706 | CG4830         | 12.39626333 | 0.060128333 | 206.1634282 |
| 9 | A10 | 18427 | CG4301         | 13.34627667 | 0.057147667 | 233.5401854 |
| 9 | A11 | 22707 | CG4852         | 14.34697333 | 0.059139333 | 242.5961289 |
| 9 | A12 | 18428 | CG4351         | 12.90397333 | 0.052464    | 245.9586256 |
| 9 | A13 | 26347 | CG15590        | 14.85847667 | 0.056803333 | 261.5775483 |
| 9 | A14 | 18418 | CG5021         | 12.11221    | 0.061180667 | 197.9744691 |
| 9 | A15 | 26352 | CG15628        | 11.82213    | 0.060477667 | 195.4792678 |
| 9 | A16 | 18419 | CG5091         | 12.63094    | 0.060730333 | 207.9840387 |
| 9 | A17 | 26348 | CG15779,CG3171 | 12.88631    | 0.046887333 | 274.8356344 |
| 9 | A18 | 18420 | CG5127         | 12.06724333 | 0.044517333 | 271.0684228 |
| 9 | A19 | 26351 | CG15601        | 15.54107667 | 0.052312333 | 297.0824598 |
| 9 | A20 | 18447 | CG4162         | 12.82454333 | 0.044637333 | 287.3053199 |
| 9 | A21 | 26370 | CG15760        | 14.04282333 | 0.046755333 | 300.3469836 |
| 9 | A22 | 18225 | CG1907         | 14.88326667 | 0.055362667 | 268.8321853 |
| 9 | A23 | 26381 | CG15742,CG1771 | 17.89690333 | 0.047105667 | 379.9310062 |
| 9 | A24 | 18230 | CG2017         | 13.51618667 | 0.063863667 | 211.6412566 |
| 9 | B01 |       | DIAP1          | 0.579873    | 0.010021667 | 57.86193248 |
| 9 | B02 |       | ex/ft          | 50.65169667 | 0.072162667 | 701.9099904 |
| 9 | B03 |       | Luc            | 1.922397667 | 0.075895333 | 25.32958987 |
| 9 | B04 |       | hpo            | 45.12547    | 0.073607667 | 613.0539391 |
| 9 | B05 | 18231 | CG2060         | 12.99497333 | 0.073691667 | 176.3425082 |
| 9 | B06 | 18522 | CG5411         | 15.09495667 | 0.076419    | 197.5288432 |
| 9 | B07 | 18234 | CG2165         | 10.29939333 | 1.078769    | 9.547357528 |
| 9 | B08 | 18516 | CG5608         | 13.45600333 | 0.062430333 | 215.5363045 |
| 9 | B09 | 18226 | CG2321         | 13.36292667 | 0.070077333 | 190.6882872 |
| 9 | B10 | 18520 | CG5339         | 13.75359    | 0.059666    | 230.5096705 |
| 9 | B11 | 18227 | CG2507         | 13.6784     | 0.066621333 | 205.3156146 |
| 9 | B12 | 18521 | CG5364         | 7.749401333 | 0.06673     | 116.1306958 |
| 9 | B13 | 18228 | CG2656         | 15.16831    | 0.058073    | 261.1938422 |
| 9 | B14 | 18584 | CG5510         | 12.95294    | 0.060839    | 212.9052088 |
| 9 | B15 | 18236 | CG2224         | 14.03932    | 0.062119    | 226.0068578 |
| 9 | B16 | 18033 | CG3980         | 12.48485    | 0.049298333 | 253.2509551 |
| 9 | B17 | 18245 | CG2126         | 12.20471667 | 0.056535667 | 215.8764084 |
| 9 | B18 | 18041 | CG5171         | 13.58600667 | 0.054699333 | 248.3760923 |
| 9 | B19 | 18519 | CG5295         | 15.50947667 | 0.060981    | 254.3329343 |
| 9 | B20 | 18040 | CG5080         | 12.80699667 | 0.050858667 | 251.8154231 |
| 9 | B21 | 18513 | CG5202         | 12.83379333 | 0.045895667 | 279.6297399 |
| 9 | B22 | 18042 | CG5227         | 14.45955333 | 0.040376    | 358.122482  |
| 9 | B23 | 18517 | CG5231         | 17.89425333 | 0.042001667 | 426.0367446 |
| 9 | B24 | 18038 | CG4288         | 13.77065667 | 0.049427667 | 278.6021998 |
| 9 | C01 | 22727 | CG4774         | 18.72948667 | 0.07607     | 246.2138381 |
| 9 | C02 | 18422 | CG4097         | 1.057887667 | 0.020655667 | 51.2153727  |
| 9 | C03 | 22708 | CG4897         | 1.272943333 | 0.048216667 | 26.40048393 |
| 9 | C04 | 18424 | CG4180         | 11.84630333 | 0.054390333 | 217.8016314 |
| 9 | C05 | 22726 | CG32568        | 11.25994333 | 0.050469333 | 223.1046576 |
| 9 | C06 | 18437 | CG4225         | 16.01262667 | 0.059492333 | 269.1544569 |
| 9 | C07 | 22728 | CG4816         | 14.42102333 | 0.057156333 | 252.3084056 |
| 9 | C08 | 18438 | CG4265         | 15.14576667 | 0.061182    | 247.5526571 |
| 9 | C09 | 22718 | CG30104        | 14.47813667 | 0.059536    | 243.1828921 |
| 9 | C10 | 18439 | CG4306         | 14.79932667 | 0.060603333 | 244.199879  |
| 9 | C11 | 22719 | CG4859         | 16.45426333 | 0.056941    | 288.9703963 |

|   |     |       |               |             |             |             |
|---|-----|-------|---------------|-------------|-------------|-------------|
| 9 | C12 | 18440 | CG4357        | 16.57167667 | 0.058785333 | 281.9015514 |
| 9 | C13 | 26359 | CG15591       | 14.69971333 | 0.051457333 | 285.6679968 |
| 9 | C14 | 18430 | CG5025        | 13.79201    | 0.05374     | 256.6432825 |
| 9 | C15 | 26364 | CG15631       | 15.43371667 | 0.056035667 | 275.4266628 |
| 9 | C16 | 18431 | CG5096        | 12.09277    | 0.061791    | 195.7043906 |
| 9 | C17 | 26360 | CG15812       | 16.84167667 | 0.060351333 | 279.0605565 |
| 9 | C18 | 18506 | CG4143        | 9.900080333 | 0.036559    | 270.7973504 |
| 9 | C19 | 26362 | CG15889       | 14.36705667 | 0.055235333 | 260.1062726 |
| 9 | C20 | 18459 | CG4164        | 12.40268333 | 0.044732667 | 277.2623288 |
| 9 | C21 | 26380 | CG32150       | 13.68614667 | 0.052738333 | 259.510413  |
| 9 | C22 | 18237 | CG1911        | 12.72201333 | 0.062775667 | 202.6583549 |
| 9 | C23 | 26377 | CG15650       | 19.10859667 | 0.060595    | 315.3493963 |
| 9 | C24 | 18229 | CG1966        | 25.02496    | 0.053347667 | 469.0919315 |
| 9 | D01 | 18242 | CG2023        | 20.70050333 | 0.073214333 | 282.7383982 |
| 9 | D02 | 18515 | CG5565        | 16.85889667 | 0.063346667 | 266.1370764 |
| 9 | D03 | 18244 | CG2103        | 14.48340333 | 0.067970667 | 213.0831437 |
| 9 | D04 | 18523 | CG5446        | 11.46997333 | 0.064766    | 177.0986835 |
| 9 | D05 | 18243 | CG2069        | 14.71164333 | 0.075879667 | 193.881233  |
| 9 | D06 | 18534 | CG5412        | 15.48895667 | 0.064512    | 240.0941944 |
| 9 | D07 | 18246 | CG2168        | 2.262444333 | 0.048806333 | 46.35554812 |
| 9 | D08 | 18528 | CG6254        | 18.39668    | 0.076704667 | 239.8378195 |
| 9 | D09 | 18238 | CG2371        | 16.48816333 | 0.055846667 | 295.239883  |
| 9 | D10 | 18532 | CG33099       | 12.19756667 | 0.054849333 | 222.3831344 |
| 9 | D11 | 18259 | CG2199        | 16.00613667 | 0.06104     | 262.2237331 |
| 9 | D12 | 18598 | CG5560        | 11.87007833 | 0.053547333 | 221.6744998 |
| 9 | D13 | 18240 | CG2662        | 14.92524333 | 0.065552    | 227.6855524 |
| 9 | D14 | 18596 | CG5515        | 13.50248333 | 0.056372667 | 239.5218132 |
| 9 | D15 | 18307 | CG2218        | 17.29012    | 0.058384333 | 296.1431434 |
| 9 | D16 | 18045 | CG3991        | 17.71591333 | 0.050220333 | 352.7637544 |
| 9 | D17 | 18257 | CG2128        | 14.72094333 | 0.059723333 | 246.4856282 |
| 9 | D18 | 18053 | CG5174        | 15.62767667 | 0.047088667 | 331.8776634 |
| 9 | D19 | 18531 | CG5304        | 15.52408333 | 0.051791667 | 299.7409493 |
| 9 | D20 | 18097 | CG4230        | 16.66504667 | 0.04809     | 346.5387121 |
| 9 | D21 | 18601 | CG5258        | 10.65404    | 0.046499    | 229.1240672 |
| 9 | D22 | 18054 | CG5252        | 18.13004333 | 0.042151    | 430.1213099 |
| 9 | D23 | 18529 | CG5235        | 15.50101667 | 0.038066333 | 407.2106586 |
| 9 | D24 | 18050 | CG4291        | 16.69893    | 0.047030333 | 355.0672261 |
| 9 | E01 | 22739 | CG4785        | 36.01028333 | 0.076876333 | 468.4183255 |
| 9 | E02 | 18434 | CG4108        | 16.17134667 | 0.094388    | 171.3284175 |
| 9 | E03 | 22720 | CG4899        | 21.14644    | 0.074285667 | 284.6637979 |
| 9 | E04 | 18436 | CG4180,CG4182 | 22.99405333 | 0.067236667 | 341.9868128 |
| 9 | E05 | 22738 | CG4726        | 22.32560333 | 0.061142667 | 365.1395098 |
| 9 | E06 | 18449 | CG4226        | 17.9533     | 0.064497333 | 278.3572447 |
| 9 | E07 | 22740 | CG4820        | 17.41589667 | 0.063358333 | 274.8793371 |
| 9 | E08 | 18450 | CG4266        | 17.39477    | 0.080809333 | 215.2569423 |
| 9 | E09 | 22730 | CG4841        | 13.55347    | 0.05933     | 228.4421035 |
| 9 | E10 | 18451 | CG4307        | 14.80887    | 0.038434333 | 385.3031578 |
| 9 | E11 | 22731 | CG4860        | 21.76828    | 0.052823    | 412.0985177 |
| 9 | E12 | 18452 | CG4365        | 17.70151667 | 0.062335667 | 283.9709209 |
| 9 | E13 | 26371 | CG15592       | 19.28344333 | 0.057251    | 336.8228211 |
| 9 | E14 | 18442 | CG5028        | 18.33040333 | 0.059142333 | 309.9371009 |
| 9 | E15 | 26376 | CG15633       | 19.31145667 | 0.049204333 | 392.4747143 |
| 9 | E16 | 18443 | CG5103        | 14.7569     | 0.046464667 | 317.5940141 |
| 9 | E17 | 26372 | CG15820       | 19.49715667 | 0.059659333 | 326.8081552 |

|   |     |       |                 |             |             |             |
|---|-----|-------|-----------------|-------------|-------------|-------------|
| 9 | E18 | 18444 | CG5154          | 18.26166    | 0.045846    | 398.3261353 |
| 9 | E19 | 26374 | CG32918         | 26.19504667 | 0.057841667 | 452.8750324 |
| 9 | E20 | 18471 | CG4165          | 18.95265667 | 0.050920667 | 372.1996963 |
| 9 | E21 | 26394 | CG15768         | 20.26846333 | 0.053200333 | 380.9837658 |
| 9 | E22 | 18313 | CG2010          | 8.033651333 | 0.052376333 | 153.3832329 |
| 9 | E23 | 26389 | CG10540,CG15653 | 22.80054333 | 0.049764    | 458.1734453 |
| 9 | E24 | 18241 | CG1969          | 19.60549333 | 0.046740333 | 419.4555737 |
| 9 | F01 | 18254 | CG2025          | 19.02926667 | 0.074683    | 254.8005124 |
| 9 | F02 | 18524 | CG5482          | 17.36282333 | 0.073611333 | 235.8716049 |
| 9 | F03 | 18256 | CG2107          | 20.59337333 | 0.068449    | 300.8571832 |
| 9 | F04 | 18535 | CG5447          | 24.22247333 | 0.060153    | 402.6810522 |
| 9 | F05 | 18255 | CG2070          | 15.64472    | 0.065706    | 238.1018476 |
| 9 | F06 | 18546 | CG31256         | 8.319846333 | 0.056953333 | 146.0818155 |
| 9 | F07 | 18258 | CG2171          | 19.65224667 | 0.062988    | 311.9998518 |
| 9 | F08 | 18540 | CG6259          | 16.35047    | 0.070314667 | 232.5328523 |
| 9 | F09 | 18250 | CG30349         | 10.46349733 | 0.075182667 | 139.174331  |
| 9 | F10 | 18544 | CG5343          | 15.75723    | 0.060853667 | 258.9364103 |
| 9 | F11 | 18295 | CG2216          | 8.260673    | 0.065917667 | 125.3180432 |
| 9 | F12 | 18545 | CG5389          | 17.39783667 | 0.05428     | 320.5202039 |
| 9 | F13 | 18252 | CG2663          | 21.04110333 | 0.058353    | 360.5830606 |
| 9 | F14 | 18039 | CG4347          | 16.49690333 | 0.055598667 | 296.7140099 |
| 9 | F15 | 18260 | CG2254          | 23.68747667 | 0.052016333 | 455.3853597 |
| 9 | F16 | 18057 | CG4001          | 13.63474333 | 0.058126    | 234.5721937 |
| 9 | F17 | 18269 | CG2135          | 21.43772333 | 0.051556    | 415.8143249 |
| 9 | F18 | 18065 | CG5186          | 16.94283333 | 0.052336667 | 323.727788  |
| 9 | F19 | 18543 | CG5316          | 19.62276    | 0.061132667 | 320.9864884 |
| 9 | F20 | 18064 | CG5105          | 19.61516333 | 0.051758    | 378.9783866 |
| 9 | F21 | 18537 | CG5210          | 17.17701667 | 0.045341333 | 378.8379257 |
| 9 | F22 | 18066 | CG5261          | 24.88224667 | 0.046980333 | 529.6311222 |
| 9 | F23 | 18541 | CG5237          | 18.87234667 | 0.046210333 | 408.401007  |
| 9 | F24 | 18062 | CG4293          | 19.77694333 | 0.039143    | 505.2485332 |
| 9 | G01 | 22751 | CG4789          | 18.75089667 | 0.072966333 | 256.9801141 |
| 9 | G02 | 18446 | CG4119          | 8.511147    | 0.084608333 | 100.5946656 |
| 9 | G03 | 22732 | CG4900          | 17.42403667 | 0.070363667 | 247.6283214 |
| 9 | G04 | 18493 | CG4082          | 13.35401    | 0.080366333 | 166.1642313 |
| 9 | G05 | 22750 | CG4735          | 18.18024667 | 0.091547667 | 198.5877667 |
| 9 | G06 | 18461 | CG4233          | 18.10948667 | 0.069181333 | 261.7683961 |
| 9 | G07 | 22752 | CG4822          | 14.76203333 | 0.068915    | 214.2063895 |
| 9 | G08 | 18462 | CG4267          | 15.85209    | 0.069033    | 229.6306114 |
| 9 | G09 | 22742 | CG4843          | 8.328153667 | 0.065579333 | 126.9935701 |
| 9 | G10 | 18463 | CG4314          | 15.57753    | 0.056263333 | 276.8682386 |
| 9 | G11 | 22743 | CG4863          | 2.031495333 | 0.054194333 | 37.48538285 |
| 9 | G12 | 18464 | CG5001          | 15.39551667 | 0.062528667 | 246.2153359 |
| 9 | G13 | 26414 | CG15678         | 15.44850333 | 0.074758333 | 206.6459035 |
| 9 | G14 | 18454 | CG32146         | 11.00310633 | 0.062448333 | 176.1953562 |
| 9 | G15 | 26401 | CG15654         | 16.87146    | 0.052140667 | 323.5758397 |
| 9 | G16 | 18455 | CG5109          | 18.48096333 | 0.054849667 | 336.9384803 |
| 9 | G17 | 26439 | CG15704         | 6.260623667 | 0.048016    | 130.3861977 |
| 9 | G18 | 18456 | CG5160          | 15.36887333 | 0.050505    | 304.3039963 |
| 9 | G19 | 26386 | CG15896,CG32918 | 17.87778333 | 0.060546333 | 295.2744179 |
| 9 | G20 | 18483 | CG4166          | 21.01179333 | 0.045215    | 464.708467  |
| 9 | G21 | 26403 | CG15701,CG15706 | 18.60346333 | 0.053724333 | 346.2762994 |
| 9 | G22 | 18261 | CG1937          | 14.49644667 | 0.039055667 | 371.1739654 |
| 9 | G23 | 18433 | CG4065          | 18.51619667 | 0.054370333 | 340.5569827 |

|   |     |       |                 |             |             |             |
|---|-----|-------|-----------------|-------------|-------------|-------------|
| 9 | G24 | 18253 | CG1970          | 17.95061    | 0.043615    | 411.5696435 |
| 9 | H01 | 18266 | CG2031          | 20.84259    | 0.082621    | 252.2674623 |
| 9 | H02 | 18539 | CG5568          | 16.38797333 | 0.076722    | 213.602009  |
| 9 | H03 | 18268 | CG2108          | 16.22631    | 0.069991333 | 231.8331317 |
| 9 | H04 | 18547 | CG31149         | 13.86889333 | 0.062338333 | 222.4777692 |
| 9 | H05 | 18267 | CG2075          | 14.22371    | 0.060800333 | 233.9413161 |
| 9 | H06 | 18558 | CG5427          | 15.60676667 | 0.055209333 | 282.6834835 |
| 9 | H07 | 18270 | CG31030         | 12.82340333 | 0.06355     | 201.7844742 |
| 9 | H08 | 18552 | CG6262          | 14.17699333 | 0.061089    | 232.0711312 |
| 9 | H09 | 18293 | CG32687         | 16.39130333 | 0.062190667 | 263.565326  |
| 9 | H10 | 18556 | CG5346          | 12.61948667 | 0.052693667 | 239.487731  |
| 9 | H11 | 18283 | CG2212          | 17.33054333 | 0.048615667 | 356.480627  |
| 9 | H12 | 18557 | CG5390          | 18.8463     | 0.059656    | 315.9162532 |
| 9 | H13 | 18305 | CG2157          | 18.19094667 | 0.059702333 | 304.6940656 |
| 9 | H14 | 18051 | CG32707         | 16.50673333 | 0.058175333 | 283.7411045 |
| 9 | H15 | 18317 | CG2161          | 17.69694333 | 0.057553667 | 307.4859407 |
| 9 | H16 | 18069 | CG4008          | 14.71170667 | 0.057639667 | 255.235804  |
| 9 | H17 | 18281 | CG2140          | 18.60412667 | 0.054127333 | 343.7103866 |
| 9 | H18 | 18077 | CG5193          | 12.36315333 | 0.031655333 | 390.5551461 |
| 9 | H19 | 18555 | CG5319          | 15.62033333 | 0.062140333 | 251.3718948 |
| 9 | H20 | 18076 | CG5119          | 4.141436667 | 0.042327667 | 97.8423096  |
| 9 | H21 | 18549 | CG5212          | 15.79606667 | 0.046674    | 338.4339604 |
| 9 | H22 | 18078 | CG5284          | 23.93354667 | 0.049741667 | 481.1569107 |
| 9 | H23 | 18553 | CG5241          | 14.96266667 | 0.058046667 | 257.7696107 |
| 9 | H24 | 18121 | CG18740         | 13.98299    | 0.073671667 | 189.8014614 |
| 9 | I01 | 22763 | CG31299         | 20.80076667 | 0.086128    | 241.5099232 |
| 9 | I02 | 18469 | CG4071          | 18.46384667 | 0.083389    | 221.4182526 |
| 9 | I03 | 22744 | CG4901          | 19.10976    | 0.083315333 | 229.3666632 |
| 9 | I04 | 18460 | CG4192          | 16.39828667 | 0.067205333 | 244.0027577 |
| 9 | I05 | 22762 | CG4742          | 14.73790333 | 0.077068    | 191.2324614 |
| 9 | I06 | 18473 | CG18734         | 14.09283    | 0.072372667 | 194.7258634 |
| 9 | I07 | 22764 | CG4824          | 18.05051    | 0.091018667 | 198.3165724 |
| 9 | I08 | 18474 | CG4270          | 14.39609667 | 0.069938333 | 205.8398589 |
| 9 | I09 | 22754 | CG4847          | 17.42656667 | 0.083699    | 208.2051956 |
| 9 | I10 | 18475 | CG4322          | 15.34219667 | 0.060556667 | 253.3527275 |
| 9 | I11 | 22755 | CG4879          | 15.96013    | 0.071848667 | 222.1353679 |
| 9 | I12 | 18476 | CG5002          | 15.87822333 | 0.073473    | 216.1096366 |
| 9 | I13 | 26395 | CG15594         | 19.69282    | 0.068144333 | 288.9869052 |
| 9 | I14 | 18466 | CG5032          | 15.54381333 | 0.064637667 | 240.4760898 |
| 9 | I15 | 26400 | CG15636         | 15.30176    | 0.059455    | 257.3670843 |
| 9 | I16 | 18467 | CG5114          | 11.71943667 | 0.064734    | 181.0398966 |
| 9 | I17 | 26361 | CG30181,CG33151 | 17.807      | 0.061993667 | 287.239019  |
| 9 | I18 | 18468 | CG5168          | 16.03986667 | 0.056212333 | 285.3442602 |
| 9 | I19 | 26399 | CG30460         | 16.13713667 | 0.053512333 | 301.5592044 |
| 9 | I20 | 18495 | CG4168          | 14.63064667 | 0.0512      | 285.7548177 |
| 9 | I21 | 26415 | CG33017         | 16.65900333 | 0.054886667 | 303.5163974 |
| 9 | I22 | 18273 | CG1939          | 13.16591    | 0.052569    | 250.4500751 |
| 9 | I23 | 18445 | CG4069          | 15.19942667 | 0.052369333 | 290.2352522 |
| 9 | I24 | 18265 | CG1971          | 18.52103333 | 0.049456    | 374.4951742 |
| 9 | J01 | 18278 | CG2040          | 17.02187333 | 0.090836333 | 187.3905816 |
| 9 | J02 | 18548 | CG5494          | 18.30701333 | 0.087639667 | 208.889582  |
| 9 | J03 | 18280 | CG2109          | 14.63220667 | 0.071295333 | 205.2337226 |
| 9 | J04 | 18550 | CG5535          | 15.82278    | 0.072668333 | 217.7396849 |
| 9 | J05 | 18279 | CG32488         | 15.35066667 | 0.081361333 | 188.672752  |

|   |     |       |         |             |             |             |
|---|-----|-------|---------|-------------|-------------|-------------|
| 9 | J06 | 18570 | CG5428  | 14.24191667 | 0.061269    | 232.4489818 |
| 9 | J07 | 18282 | CG2177  | 21.65985333 | 0.068876667 | 314.4730194 |
| 9 | J08 | 18564 | CG31729 | 14.17575    | 0.068916333 | 205.6950699 |
| 9 | J09 | 18274 | CG2448  | 14.05488    | 0.063878    | 220.0269263 |
| 9 | J10 | 18568 | CG5352  | 10.01770967 | 0.10077     | 99.41162714 |
| 9 | J11 | 18275 | CG2614  | 16.79497333 | 0.063775667 | 263.3445358 |
| 9 | J12 | 18569 | CG5395  | 17.69861667 | 0.063983333 | 276.61292   |
| 9 | J13 | 18276 | CG2670  | 8.536896333 | 0.051394667 | 166.1047126 |
| 9 | J14 | 18063 | CG4364  | 10.06283433 | 0.069849667 | 144.0641711 |
| 9 | J15 | 18284 | CG2261  | 23.59955667 | 0.0731      | 322.8393525 |
| 9 | J16 | 18081 | CG4016  | 16.15869667 | 0.062479333 | 258.6246652 |
| 9 | J17 | 18518 | CG5262  | 15.58436333 | 0.053332333 | 292.2122915 |
| 9 | J18 | 18089 | CG5196  | 16.66496333 | 0.067011667 | 248.6874922 |
| 9 | J19 | 18567 | CG5330  | 10.371511   | 0.058463333 | 177.4019784 |
| 9 | J20 | 18088 | CG31441 | 16.87289333 | 0.061089333 | 276.2003187 |
| 9 | J21 | 18561 | CG5216  | 12.41782    | 0.061403    | 202.2347442 |
| 9 | J22 | 18037 | CG4104  | 16.98107333 | 0.058098667 | 292.2799146 |
| 9 | J23 | 18602 | CG5290  | 16.47875667 | 0.045727667 | 360.3673196 |
| 9 | J24 | 18086 | CG4303  | 10.103538   | 0.064907    | 155.6617622 |
| 9 | K02 | 18481 | CG4076  | 22.74114    | 0.083785333 | 271.4214898 |
| 9 | K03 | 22756 | CG4907  | 15.25108333 | 0.07577     | 201.2812899 |
| 9 | K04 | 18472 | CG4203  | 20.6062     | 0.074133    | 277.9625808 |
| 9 | K05 | 22774 | CG4753  | 16.46410667 | 0.085742667 | 192.0176653 |
| 9 | K06 | 18485 | CG4236  | 18.21331667 | 0.078967667 | 230.6427103 |
| 9 | K07 | 22776 | CG4825  | 51.12373    | 0.082268333 | 621.4265918 |
| 9 | K08 | 18486 | CG4272  | 16.97338    | 0.094152    | 180.2763616 |
| 9 | K09 | 22766 | CG4848  | 14.91135    | 0.087478667 | 170.4569876 |
| 9 | K1  | 22775 | CG4797  | 11.90870333 | 0.065256    | 182.4920825 |
| 9 | K10 | 18487 | CG4323  | 22.37566333 | 0.054056    | 413.93487   |
| 9 | K11 | 22767 | CG4881  | 15.06662    | 0.057435667 | 262.32167   |
| 9 | K12 | 18488 | CG5004  | 14.83872333 | 0.056909333 | 260.743229  |
| 9 | K13 | 26409 | CG15882 | 16.98712    | 0.062563667 | 271.5173343 |
| 9 | K14 | 18478 | CG5047  | 14.88436667 | 0.063828    | 233.1949406 |
| 9 | K15 | 26437 | CG30393 | 17.68342    | 0.055004667 | 321.4894494 |
| 9 | K16 | 18479 | CG5122  | 16.69969667 | 0.051156667 | 326.4422363 |
| 9 | K17 | 26408 | CG32986 | 15.65481333 | 0.05285     | 296.2121728 |
| 9 | K18 | 18480 | CG5181  | 14.82043533 | 0.056842333 | 260.7288347 |
| 9 | K19 | 26410 | CG15902 | 15.52929667 | 0.052226667 | 297.3442047 |
| 9 | K20 | 18507 | CG4174  | 14.30828667 | 0.050810333 | 281.6019051 |
| 9 | K21 | 26430 | CG15777 | 16.33595667 | 0.054444333 | 300.048796  |
| 9 | K22 | 18285 | CG1944  | 17.89021    | 0.054344    | 329.2030399 |
| 9 | K23 | 18457 | CG4070  | 16.99989    | 0.061097333 | 278.2427493 |
| 9 | K24 | 18277 | CG1972  | 21.91382667 | 0.054214    | 404.2097367 |
| 9 | L01 | 18290 | CG2045  | 18.88487667 | 0.08931     | 211.4531034 |
| 9 | L02 | 18563 | CG32191 | 16.98251667 | 0.084634333 | 200.6575346 |
| 9 | L03 | 18292 | CG2112  | 15.17217667 | 0.077469333 | 195.8475182 |
| 9 | L04 | 18562 | CG5537  | 13.90842333 | 0.082699    | 168.1812759 |
| 9 | L05 | 18291 | CG2081  | 14.74165667 | 0.071173    | 207.124284  |
| 9 | L06 | 18582 | CG5432  | 14.80120667 | 0.073896333 | 200.2969024 |
| 9 | L07 | 18294 | CG2179  | 18.53622    | 0.074563667 | 248.5958756 |
| 9 | L08 | 18576 | CG33106 | 6.941231667 | 0.078318333 | 88.62843949 |
| 9 | L09 | 18286 | CG2478  | 18.86311667 | 0.066962333 | 281.6974219 |
| 9 | L10 | 18580 | CG5353  | 13.62802333 | 0.067516    | 201.8487963 |
| 9 | L11 | 18287 | CG2641  | 15.66015    | 0.074632667 | 209.8296992 |

|   |     |       |                        |             |             |             |
|---|-----|-------|------------------------|-------------|-------------|-------------|
| 9 | L12 | 18581 | CG5398                 | 13.57909    | 0.059938667 | 226.5497509 |
| 9 | L13 | 18288 | CG2675                 | 15.67885333 | 0.054188667 | 289.338238  |
| 9 | L14 | 18073 | CG4148                 | 15.68421333 | 0.064979333 | 241.3723338 |
| 9 | L15 | 18296 | CG32688                | 14.98393333 | 0.068005667 | 220.3335997 |
| 9 | L16 | 18093 | CG4059                 | 19.62617333 | 0.062484667 | 314.0958315 |
| 9 | L17 | 18530 | CG5263                 | 12.78133333 | 0.055701    | 229.4632652 |
| 9 | L18 | 18101 | CG5208                 | 6.413478667 | 0.036971    | 173.4732268 |
| 9 | L19 | 18579 | CG5333                 | 17.04058667 | 0.056943333 | 299.255166  |
| 9 | L20 | 18100 | CG5165                 | 16.28251667 | 0.052915    | 307.710794  |
| 9 | L21 | 18573 | CG5219                 | 19.94046667 | 0.051736333 | 385.4248143 |
| 9 | L22 | 18111 | CG5033                 | 11.59751    | 0.061010667 | 190.089875  |
| 9 | L23 | 18577 | CG31156                | 15.64951    | 0.052807667 | 296.3492043 |
| 9 | L24 | 18098 | CG4321                 | 13.77695333 | 0.048615    | 283.3889403 |
| 9 | M01 | 22787 | CG4798                 | 22.84927667 | 0.108022667 | 211.5229828 |
| 9 | M02 | 18482 | CG31657                | 14.98012333 | 0.075479333 | 198.466556  |
| 9 | M03 | 22768 | CG4912                 | 14.75597333 | 0.065776333 | 224.335602  |
| 9 | M04 | 18505 | CG4091                 | 15.23327333 | 0.063827    | 238.6650373 |
| 9 | M05 | 22786 | CG4757                 | 16.01975667 | 0.065320333 | 245.2491567 |
| 9 | M06 | 18497 | CG4238                 | 17.77167333 | 0.058814333 | 302.1656852 |
| 9 | M07 | 22788 | CG31743                | 18.95415333 | 0.067371667 | 281.3371595 |
| 9 | M08 | 18498 | CG4294                 | 11.19692    | 0.068721    | 162.933019  |
| 9 | M09 | 22778 | CG31054,CG31131,CG4849 | 9.137034333 | 0.072322    | 126.3382419 |
| 9 | M10 | 18499 | CG4326                 | 18.26762    | 0.059231    | 308.413162  |
| 9 | M11 | 22779 | CG4882                 | 18.31508    | 0.078176333 | 234.279087  |
| 9 | M12 | 18500 | CG5013                 | 17.68857    | 0.058301667 | 303.39733   |
| 9 | M13 | 26419 | CG15596                | 17.01158    | 0.055913333 | 304.249076  |
| 9 | M14 | 18490 | CG5058                 | 16.00036    | 0.057693    | 277.3362453 |
| 9 | M15 | 26424 | CG15638,CG9239         | 14.76205    | 0.053967333 | 273.5367692 |
| 9 | M16 | 18491 | CG5124                 | 15.87042333 | 0.059638333 | 266.1111142 |
| 9 | M17 | 26420 | CG15867                | 17.10163333 | 0.057662    | 296.5841166 |
| 9 | M18 | 18492 | CG5198                 | 14.1529     | 0.051129333 | 276.8058779 |
| 9 | M19 | 26423 | CG15614                | 16.03218667 | 0.049297333 | 325.2140751 |
| 9 | M20 | 18508 | CG4217                 | 18.68391    | 0.051482333 | 362.9188654 |
| 9 | M21 | 26442 | CG15778                | 17.50367    | 0.045851667 | 381.7455563 |
| 9 | M22 | 18297 | CG30493                | 15.51283    | 0.048853333 | 317.5388237 |
| 9 | M23 | 18417 | CG4025                 | 16.85579667 | 0.045085    | 373.8670659 |
| 9 | M24 | 18289 | CG1998                 | 16.40327667 | 0.051527    | 318.3433281 |
| 9 | N01 | 18302 | CG2051                 | 22.85361    | 0.089105333 | 256.4785871 |
| 9 | N02 | 18575 | CG5591                 | 8.898607667 | 0.075555667 | 117.7755165 |
| 9 | N03 | 18304 | CG2113                 | 16.15157333 | 0.066965667 | 241.1918545 |
| 9 | N04 | 18583 | CG5472                 | 18.50139    | 0.064551    | 286.6166287 |
| 9 | N05 | 18303 | CG2083                 | 12.24549    | 0.066386667 | 184.4570697 |
| 9 | N06 | 18594 | CG5441                 | 17.93312333 | 0.062189    | 288.364877  |
| 9 | N07 | 18306 | CG2183                 | 17.86508667 | 0.071695333 | 249.1806068 |
| 9 | N08 | 18588 | CG6287                 | 20.01129333 | 0.066604667 | 300.4488174 |
| 9 | N09 | 18298 | CG2503                 | 15.63142333 | 0.071851333 | 217.5523071 |
| 9 | N10 | 18592 | CG5354                 | 17.08981667 | 0.065608    | 260.4837317 |
| 9 | N11 | 18299 | CG2647                 | 17.77071333 | 0.060025    | 296.0551992 |
| 9 | N12 | 18599 | CG5602                 | 15.00225667 | 0.059946333 | 250.2614561 |
| 9 | N13 | 18300 | CG2677                 | 16.71741333 | 0.051745667 | 323.068856  |
| 9 | N14 | 18087 | CG5018                 | 11.31971533 | 0.063952333 | 177.002382  |
| 9 | N15 | 18319 | CG2222                 | 16.14907667 | 0.067151    | 240.4889974 |
| 9 | N16 | 18105 | CG4062                 | 17.31765333 | 0.056502    | 306.4962892 |
| 9 | N17 | 18542 | CG5266                 | 1.485731    | 0.021556333 | 68.92317803 |

|   |     |       |               |             |             |             |
|---|-----|-------|---------------|-------------|-------------|-------------|
| 9 | N18 | 18113 | CG5214        | 17.47359667 | 0.052900667 | 330.3095739 |
| 9 | N19 | 18591 | CG5335        | 20.79005667 | 0.054996667 | 378.0239408 |
| 9 | N20 | 18112 | CG5166        | 19.13425333 | 0.152496667 | 125.4732562 |
| 9 | N21 | 18585 | CG5220        | 17.07286667 | 0.049742667 | 343.2237918 |
| 9 | N22 | 18061 | CG4118        | 17.5351     | 0.057747333 | 303.6521167 |
| 9 | N23 | 18589 | CG5254        | 20.84027667 | 0.046556    | 447.6389008 |
| 9 | N24 | 18123 | CG5037        | 17.36445667 | 0.045811333 | 379.0428133 |
| 9 | O01 | 22799 | CG4807        | 20.50739667 | 0.091267333 | 224.6959116 |
| 9 | O02 | 18494 | CG32763       | 11.54138    | 0.078855333 | 146.3614382 |
| 9 | O03 | 22780 | CG4913        | 8.50784     | 0.051672333 | 164.6498126 |
| 9 | O04 | 18496 | CG4215        | 12.22291    | 0.074570333 | 163.9111622 |
| 9 | O05 | 22798 | CG4758        | 12.89255    | 0.073238667 | 176.0347449 |
| 9 | O06 | 18509 | CG4239        | 7.224144    | 0.087094333 | 82.9462001  |
| 9 | O07 | 22800 | CG4829        | 15.62850333 | 0.079716333 | 196.0514575 |
| 9 | O08 | 18510 | CG4300        | 15.37152    | 0.060279    | 255.0062211 |
| 9 | O09 | 22790 | CG4851        | 15.58246    | 0.068627333 | 227.0590921 |
| 9 | O10 | 18511 | CG4332        | 15.59439667 | 0.062521667 | 249.4238797 |
| 9 | O11 | 22791 | CG4894        | 11.331259   | 0.059724333 | 189.7260022 |
| 9 | O12 | 18512 | CG5017        | 12.42358333 | 0.060663    | 204.7967185 |
| 9 | O13 | 26433 | CG15887       | 17.29503667 | 0.062348333 | 277.3937288 |
| 9 | O14 | 18502 | CG5064        | 8.062256333 | 0.057221667 | 140.8951679 |
| 9 | O15 | 26436 | CG15642       | 14.54418667 | 0.057008333 | 255.1238708 |
| 9 | O16 | 18503 | CG5126        | 12.12634667 | 0.054108    | 224.1137478 |
| 9 | O17 | 26397 | CG15878       | 14.56896333 | 0.055176    | 264.0452975 |
| 9 | O18 | 18504 | CG5201        | 14.17849    | 0.050787667 | 279.1719118 |
| 9 | O19 | 26435 | CG15615       | 12.95562333 | 0.055435    | 233.7083672 |
| 9 | O20 | 18301 | CG2004        | 13.66870667 | 0.056722333 | 240.9757474 |
| 9 | O21 |       | wts           | 61.93979667 | 0.042907667 | 1443.560125 |
| 9 | O22 |       | HFA17794      | 1.445751333 | 0.012526667 | 115.4138904 |
| 9 | O23 |       | hpo           | 42.32565333 | 0.043636667 | 969.9561531 |
| 9 | O24 |       | Luc           | 2.245071333 | 0.050324667 | 44.61174772 |
| 9 | P01 | 18314 | CG2056        | 11.528542   | 0.085092333 | 135.4827344 |
| 9 | P02 | 18587 | CG5599        | 13.54296667 | 0.081805    | 165.5518204 |
| 9 | P03 | 18316 | CG2121        | 13.02722333 | 0.076888333 | 169.4304294 |
| 9 | P04 | 18586 | CG5547        | 11.89088333 | 0.051966333 | 228.818979  |
| 9 | P05 | 18315 | CG2091        | 9.841760667 | 0.071666333 | 137.3275318 |
| 9 | P06 | 18606 | CG32849       | 11.26266333 | 0.077630333 | 145.080703  |
| 9 | P07 | 18318 | CG2185        | 11.834868   | 0.073607    | 160.7845449 |
| 9 | P08 | 18600 | CG6293        | 12.294618   | 0.061780333 | 199.0053685 |
| 9 | P09 | 18310 | CG2505        | 11.748705   | 0.072526    | 161.9930094 |
| 9 | P10 | 18607 | CG4091,CG5479 | 11.61791667 | 0.078026667 | 148.8967447 |
| 9 | P11 | 18311 | CG31472       | 11.37705333 | 0.080596333 | 141.1609296 |
| 9 | P12 | 18605 | CG5410        | 10.830272   | 0.069522    | 155.7819395 |
| 9 | P13 | 18312 | CG2680        | 12.37816333 | 0.056476    | 219.175638  |
| 9 | P14 | 18099 | CG5029        | 12.27189667 | 0.053373    | 229.9270543 |
| 9 | P15 | 18320 | CG2316        | 13.83215333 | 0.060496667 | 228.643231  |
| 9 | P16 | 18117 | CG4088        | 12.75093    | 0.061969333 | 205.761936  |
| 9 | P17 | 18590 | CG5287        | 8.128619333 | 0.063698    | 127.6118455 |
| 9 | P18 | 18125 | CG5226        | 13.04652    | 0.062194    | 209.7713606 |
| 9 | P19 | 18597 | CG5224        | 11.087492   | 0.057506333 | 192.8047114 |
| 9 | P20 | 18109 | CG31671       | 11.57542    | 0.052310667 | 221.2822114 |
| 9 | P21 |       | wts           | 65.84283667 | 0.039394    | 1671.392513 |
| 9 | P22 |       | HFA17794      | 1.224707333 | 0.011624333 | 105.3572104 |
| 9 | P23 |       | hpo           | 41.69981667 | 0.040212    | 1036.99932  |



|    |     |       |                |             |             |             |
|----|-----|-------|----------------|-------------|-------------|-------------|
| 9  | P24 |       | Luc            | 1.764199    | 0.058984667 | 29.90945104 |
| 10 | A01 |       | DIAP1          | 0.597261333 | 0.010332333 | 57.80507791 |
| 10 | A02 |       | ex/ft          | 49.84207    | 0.060875333 | 818.7564202 |
| 10 | A03 |       | Luc            | 1.791197    | 0.071104    | 25.19122694 |
| 10 | A04 |       | hpo            | 44.38755    | 0.059414333 | 747.0848785 |
| 10 | A05 | 18043 | CG5355         | 14.84321667 | 0.060295    | 246.1765763 |
| 10 | A06 | 18994 | CG2718         | 14.56629    | 0.06139     | 237.2746376 |
| 10 | A07 | 18034 | CG5486         | 12.21973667 | 0.058529333 | 208.7797002 |
| 10 | A08 | 19080 | CG3688         | 11.275704   | 0.055900667 | 201.7096516 |
| 10 | A09 | 18035 | CG5525         | 10.50232467 | 0.062399333 | 168.3082832 |
| 10 | A10 | 19838 | CG18212,CG7655 | 11.81448667 | 0.062245667 | 189.8041631 |
| 10 | A11 | 18993 | CG1895         | 13.06210667 | 0.057646333 | 226.5904163 |
| 10 | A12 | 19841 | CG7737         | 11.70697733 | 0.05373     | 217.8853031 |
| 10 | A13 | 19000 | CG2129         | 14.85848667 | 0.056793667 | 261.6222466 |
| 10 | A14 | 19842 | CG7759         | 15.20658667 | 0.053568667 | 283.8709196 |
| 10 | A15 | 19001 | CG2275         | 28.00111667 | 0.114634667 | 244.2639516 |
| 10 | A16 | 19844 | CG33206        | 13.87341333 | 0.050701333 | 273.6301478 |
| 10 | A17 | 18998 | CG2003         | 13.82215667 | 0.055627667 | 248.4762978 |
| 10 | A18 | 19843 | CG7780         | 11.46585667 | 0.047769    | 240.0271445 |
| 10 | A19 | 18999 | CG31000        | 14.94663333 | 0.049219333 | 303.6740305 |
| 10 | A20 | 19834 | CG7220,CG7614  | 15.09357667 | 0.050631    | 298.1093928 |
| 10 | A21 | 19004 | CG2650         | 15.58776333 | 0.057275    | 272.1564964 |
| 10 | A22 | 19846 | CG7857         | 16.50510667 | 0.050286    | 328.2246881 |
| 10 | A23 | 18997 | CG1941         | 14.65037333 | 0.051164667 | 286.337707  |
| 10 | A24 | 19840 | CG31231,CG7700 | 15.54161667 | 0.059081    | 263.0560868 |
| 10 | B01 |       | DIAP1          | 0.618422333 | 0.012283    | 50.34782491 |
| 10 | B02 |       | ex/ft          | 51.65244    | 0.066896    | 772.1304712 |
| 10 | B03 |       | Luc            | 1.928309667 | 0.079082667 | 24.38346793 |
| 10 | B04 |       | hpo            | 46.67684333 | 0.06868     | 679.6278878 |
| 10 | B05 | 20803 | CG3320         | 3.561142    | 0.067135667 | 53.0439657  |
| 10 | B06 | 22230 | CG2967         | 15.18972333 | 0.061659333 | 246.3491334 |
| 10 | B07 | 20799 | CG2005         | 14.80551    | 0.062265    | 237.7822212 |
| 10 | B08 | 22231 | CG3041         | 12.19723333 | 0.061194667 | 199.3185681 |
| 10 | B09 | 20792 | CG14396        | 14.1191     | 0.071062333 | 198.68613   |
| 10 | B10 | 22234 | CG3429         | 15.62186667 | 0.059175333 | 263.9928799 |
| 10 | B11 | 20797 | CG1609         | 12.79437667 | 0.057144    | 223.8971137 |
| 10 | B12 | 22235 | CG3593         | 12.33420333 | 0.059061667 | 208.8360189 |
| 10 | B13 | 20798 | CG1848         | 15.36591667 | 0.071201    | 215.8104053 |
| 10 | B14 | 22227 | CG4620         | 14.69901667 | 0.056210667 | 261.4987072 |
| 10 | B15 | 20801 | CG2835         | 15.10232667 | 0.052948    | 285.2294075 |
| 10 | B16 | 22228 | CG4729         | 14.08595333 | 0.050546333 | 278.6740878 |
| 10 | B17 | 20802 | CG3105         | 15.73077    | 0.060167667 | 261.4488956 |
| 10 | B18 | 22229 | CG31210,CG4836 | 12.61542667 | 0.045343    | 278.2221438 |
| 10 | B19 | 20793 | CG3664         | 49.67210667 | 0.083334333 | 596.0581273 |
| 10 | B20 | 22232 | CG3228         | 7.197965    | 0.060637333 | 118.7051706 |
| 10 | B21 | 20812 | CG2577         | 13.37610667 | 0.055673667 | 240.2591291 |
| 10 | B22 | 22236 | CG32575        | 6.321544333 | 0.051030333 | 123.8781705 |
| 10 | B23 | 22226 | CG1822         | 14.9833     | 0.048973    | 305.9502175 |
| 10 | B24 | 19667 | CG6778         | 14.23061667 | 0.055637333 | 255.7745998 |
| 10 | C01 | 18036 | CG6264         | 15.805289   | 0.062522667 | 252.7929444 |
| 10 | C02 | 18996 | CG2902         | 11.98982667 | 0.065483    | 183.0983105 |
| 10 | C03 | 18044 | CG5431         | 14.78646767 | 0.069993333 | 211.2553719 |
| 10 | C04 | 19031 | CG32683        | 15.56006333 | 0.058559333 | 265.714489  |
| 10 | C05 | 18126 | CG5320         | 13.78241    | 0.058662333 | 234.9447971 |

|    |     |       |               |             |             |             |
|----|-----|-------|---------------|-------------|-------------|-------------|
| 10 | C06 | 19006 | CG2772        | 15.94290667 | 0.053352333 | 298.8230443 |
| 10 | C07 | 18128 | CG5484        | 15.01496    | 0.056814667 | 264.2796461 |
| 10 | C08 | 19851 | CG7678        | 17.21124667 | 0.068080667 | 252.8066705 |
| 10 | C09 | 18047 | CG5555        | 12.19582333 | 0.073996    | 164.8173325 |
| 10 | C10 | 19850 | CG7658        | 15.29718667 | 0.061082333 | 250.4355324 |
| 10 | C11 | 19005 | CG1901        | 15.96519    | 0.056610667 | 282.0173466 |
| 10 | C12 | 19853 | CG7740        | 14.75137667 | 0.058833667 | 250.7301942 |
| 10 | C13 | 19012 | CG31619       | 17.81545667 | 0.049919667 | 356.8825246 |
| 10 | C14 | 19854 | CG7763        | 16.97138667 | 0.042600333 | 398.3862411 |
| 10 | C15 | 19013 | CG2277        | 15.10257667 | 0.048463333 | 311.6289291 |
| 10 | C16 | 19856 | CG7825        | 14.00209333 | 0.049638    | 282.084156  |
| 10 | C17 | 19010 | CG2006        | 18.46289333 | 0.051735333 | 356.8720281 |
| 10 | C18 | 19855 | CG7786        | 16.11417    | 0.042967    | 375.0359578 |
| 10 | C19 | 19011 | CG2102        | 18.46037667 | 0.045966    | 401.6093779 |
| 10 | C20 | 19845 | CG7615        | 16.31309333 | 0.044192333 | 369.1385384 |
| 10 | C21 | 19016 | CG2655        | 18.79006667 | 0.048743667 | 385.4873454 |
| 10 | C22 | 19858 | CG7860        | 15.32034667 | 0.049408    | 310.0782599 |
| 10 | C23 | 19009 | CG1950        | 16.87454667 | 0.045261667 | 372.8220348 |
| 10 | C24 | 19852 | CG7706        | 17.89561333 | 0.041220667 | 434.1417735 |
| 10 | D01 | 19836 | CG31040       | 14.85427333 | 0.081233667 | 182.8585849 |
| 10 | D02 | 22249 | CG4559        | 16.34023333 | 0.065239    | 250.4672563 |
| 10 | D03 | 19860 | CG7915,CG7919 | 12.49947333 | 0.060730667 | 205.8181479 |
| 10 | D04 | 22233 | CG3344        | 16.06199333 | 0.085189667 | 188.5439157 |
| 10 | D05 | 20815 | CG3324        | 16.48084333 | 0.072342333 | 227.8174144 |
| 10 | D06 | 22242 | CG2969        | 14.85993    | 0.069805    | 212.8777308 |
| 10 | D07 | 20866 | CG31183       | 14.29433667 | 0.061822333 | 231.2163889 |
| 10 | D08 | 22243 | CG3061        | 15.83961333 | 0.062427667 | 253.7274606 |
| 10 | D09 | 20831 | CG4353        | 27.21785333 | 0.068833333 | 395.4167554 |
| 10 | D10 | 22246 | CG3458        | 12.97818367 | 0.083081333 | 156.2105848 |
| 10 | D11 | 20809 | CG1658        | 13.15097    | 0.064487667 | 203.9300021 |
| 10 | D12 | 22247 | CG3605        | 9.664418    | 0.081950667 | 117.9297057 |
| 10 | D13 | 20810 | CG1891        | 12.78989333 | 0.060182333 | 212.5190671 |
| 10 | D14 | 22239 | CG4634        | 17.05834333 | 0.080291    | 212.4564812 |
| 10 | D15 | 20813 | CG2845        | 10.88457167 | 0.055912667 | 194.6709452 |
| 10 | D16 | 22240 | CG4738        | 4.512092667 | 0.041969333 | 107.5092766 |
| 10 | D17 | 20843 | CG31795       | 17.89266333 | 0.043962    | 407.0029419 |
| 10 | D18 | 22241 | CG4845        | 12.30985333 | 0.050699667 | 242.7994924 |
| 10 | D19 | 20805 | CG3682        | 17.77783    | 0.050863333 | 349.5215283 |
| 10 | D20 | 22244 | CG3231        | 16.28329667 | 0.057948333 | 280.9968075 |
| 10 | D21 | 20824 | CG2595        | 18.46796667 | 0.054075667 | 341.5208319 |
| 10 | D22 | 22248 | CG4424        | 15.32050667 | 0.045218333 | 338.8118389 |
| 10 | D23 | 22238 | CG1826        | 18.94480667 | 0.058275    | 325.0932075 |
| 10 | D24 | 19675 | CG6754        | 19.03037    | 0.056477667 | 336.9538992 |
| 10 | E01 | 18095 | CG5604        | 21.23854    | 0.066205667 | 320.7964072 |
| 10 | E02 | 19008 | CG31546       | 23.34740333 | 0.063541667 | 367.4345443 |
| 10 | E03 | 18102 | CG5315        | 22.55286667 | 0.067042    | 336.3990732 |
| 10 | E04 | 19088 | CG2712        | 20.73413333 | 0.058836333 | 352.4035602 |
| 10 | E05 | 18067 | CG5374        | 10.92044667 | 0.055954    | 195.168293  |
| 10 | E06 | 19018 | CG31973       | 21.28366    | 0.061319667 | 347.0935371 |
| 10 | E07 | 18058 | CG5508        | 22.17034333 | 0.063468    | 349.315298  |
| 10 | E08 | 19863 | CG7685        | 21.7861     | 0.059607333 | 365.4936194 |
| 10 | E09 | 18059 | CG5594        | 21.51995    | 0.056855667 | 378.50141   |
| 10 | E10 | 19862 | CG7659        | 23.44434333 | 0.057386333 | 408.5353075 |
| 10 | E11 | 19017 | CG32663       | 25.90232333 | 0.062123    | 416.9522292 |

|    |     |       |         |             |             |             |
|----|-----|-------|---------|-------------|-------------|-------------|
| 10 | E12 | 19865 | CG7744  | 18.52903667 | 0.047778333 | 387.8125371 |
| 10 | E13 | 19024 | CG2174  | 24.10075667 | 0.056133667 | 429.3458471 |
| 10 | E14 | 19866 | CG7770  | 29.96528    | 0.047671333 | 628.5806984 |
| 10 | E15 | 19025 | CG30375 | 20.52016    | 0.053226333 | 385.5264625 |
| 10 | E16 | 19868 | CG7833  | 20.02888333 | 0.045158333 | 443.5257428 |
| 10 | E17 | 19022 | CG2014  | 25.54687333 | 0.050322333 | 507.6647214 |
| 10 | E18 | 19867 | CG7795  | 19.4943     | 0.051248    | 380.3914299 |
| 10 | E19 | 19023 | CG2104  | 21.42946333 | 0.044956    | 476.6763799 |
| 10 | E20 | 19857 | CG32443 | 21.29246333 | 0.057216333 | 372.1395988 |
| 10 | E21 | 19028 | CG2657  | 19.99363667 | 0.054747667 | 365.1961423 |
| 10 | E22 | 19870 | CG7869  | 21.58826667 | 0.052216667 | 413.436323  |
| 10 | E23 | 19021 | CG1961  | 21.52965667 | 0.044050667 | 488.7475785 |
| 10 | E24 | 19924 | CG7735  | 21.50813    | 0.052912667 | 406.4835767 |
| 10 | F01 | 19918 | CG7876  | 21.524      | 0.074422333 | 289.2142592 |
| 10 | F02 | 22261 | CG4561  | 15.45256333 | 0.059500667 | 259.7040369 |
| 10 | F03 | 19919 | CG7914  | 16.40265667 | 0.074561    | 219.9897623 |
| 10 | F04 | 22245 | CG3345  | 15.24989667 | 0.065397333 | 233.1883563 |
| 10 | F05 | 20827 | CG3461  | 15.90497    | 0.062845333 | 253.0811622 |
| 10 | F06 | 22254 | CG2977  | 20.93940333 | 0.06557     | 319.3442631 |
| 10 | F07 | 20823 | CG2048  | 9.014158333 | 0.056355    | 159.9531245 |
| 10 | F08 | 22255 | CG3066  | 18.57311333 | 0.061975667 | 299.683962  |
| 10 | F09 | 20816 | CG1098  | 13.47448667 | 0.052989    | 254.2883743 |
| 10 | F10 | 22258 | CG3476  | 17.18668667 | 0.064827333 | 265.1148178 |
| 10 | F11 | 20821 | CG1747  | 13.05202    | 0.051600667 | 252.942856  |
| 10 | F12 | 22259 | CG3612  | 11.33457333 | 0.043195667 | 262.4007038 |
| 10 | F13 | 20822 | CG1900  | 19.20783    | 0.055170333 | 348.1550471 |
| 10 | F14 | 22251 | CG4649  | 15.07852333 | 0.062691    | 240.5213401 |
| 10 | F15 | 20825 | CG2899  | 7.989176    | 0.055526    | 143.8817131 |
| 10 | F16 | 22252 | CG4747  | 14.25669333 | 0.061004667 | 233.6984056 |
| 10 | F17 | 20826 | CG3129  | 16.67092667 | 0.054362    | 306.6650724 |
| 10 | F18 | 22253 | CG4878  | 3.818365    | 0.048573333 | 78.6103143  |
| 10 | F19 | 20817 | CG3799  | 17.60673667 | 0.043588    | 403.9354104 |
| 10 | F20 | 22317 | CG3425  | 15.21918667 | 0.051483667 | 295.6119417 |
| 10 | F21 | 20836 | CG2615  | 16.09802333 | 0.044086667 | 365.1449418 |
| 10 | F22 | 22260 | CG4428  | 13.57052667 | 0.048192333 | 281.5909861 |
| 10 | F23 | 22250 | CG1828  | 13.15957667 | 0.060094667 | 218.9807748 |
| 10 | F24 | 19687 | CG6762  | 16.76210333 | 0.036931    | 453.8762377 |
| 10 | G01 | 18090 | CG5288  | 13.68654333 | 0.067209667 | 203.6395062 |
| 10 | G02 | 19020 | CG2911  | 16.15680667 | 0.064794    | 249.3565248 |
| 10 | G03 | 18068 | CG5444  | 3.199616667 | 0.044223333 | 72.35132283 |
| 10 | G04 | 19055 | CG2887  | 13.68073333 | 0.066086    | 207.0140927 |
| 10 | G05 | 18079 | CG5384  | 13.91381    | 0.057344333 | 242.6361803 |
| 10 | G06 | 19030 | CG2788  | 14.78787667 | 0.053116333 | 278.4054497 |
| 10 | G07 | 18070 | CG30116 | 15.92344667 | 0.061918667 | 257.167144  |
| 10 | G08 | 19875 | CG31122 | 16.76153    | 0.048727    | 343.9885484 |
| 10 | G09 | 18120 | CG6376  | 1.632005333 | 0.031807667 | 51.30855245 |
| 10 | G10 | 19874 | CG7663  | 14.57294667 | 0.061348333 | 237.5442962 |
| 10 | G11 | 19029 | CG1916  | 15.65090667 | 0.062434333 | 250.6778856 |
| 10 | G12 | 19877 | CG7745  | 16.08667333 | 0.052785    | 304.7584225 |
| 10 | G13 | 19036 | CG2187  | 17.27313667 | 0.052071333 | 331.7206524 |
| 10 | G14 | 19878 | CG7771  | 17.41315333 | 0.053013    | 328.4694949 |
| 10 | G15 | 19037 | CG2292  | 17.49063667 | 0.046778667 | 373.9019924 |
| 10 | G16 | 19880 | CG7837  | 16.18119333 | 0.048898333 | 330.9150278 |
| 10 | G17 | 19034 | CG2047  | 18.43669667 | 0.044996333 | 409.7377564 |

|    |     |       |               |             |             |             |
|----|-----|-------|---------------|-------------|-------------|-------------|
| 10 | G18 | 19879 | CG30035       | 15.63894667 | 0.048256    | 324.0829465 |
| 10 | G19 | 19035 | CG2105        | 14.59844    | 0.044573667 | 327.5126569 |
| 10 | G20 | 19869 | CG7620        | 15.57575333 | 0.048926333 | 318.3511265 |
| 10 | G21 | 19040 | CG2679        | 17.88010667 | 0.049731333 | 359.5340295 |
| 10 | G22 | 19882 | CG32557       | 20.14014333 | 0.04876     | 413.0464178 |
| 10 | G23 | 19086 | CG2540        | 19.33644667 | 0.054042333 | 357.8018467 |
| 10 | G24 | 19876 | CG7710        | 17.38858333 | 0.040028333 | 434.4068785 |
| 10 | H01 | 19859 | CG7895        | 16.50440667 | 0.067345    | 245.0724874 |
| 10 | H02 | 22273 | CG4573        | 15.56291667 | 0.063842    | 243.772386  |
| 10 | H03 | 19920 | CG7950        | 14.53387333 | 0.062958333 | 230.8490801 |
| 10 | H04 | 22308 | CG4535        | 14.47765333 | 0.064809    | 223.3895498 |
| 10 | H05 | 20839 | CG3525        | 15.05934333 | 0.061548667 | 244.6737541 |
| 10 | H06 | 22266 | CG2991        | 16.27692667 | 0.060506667 | 269.0104672 |
| 10 | H07 | 20835 | CG2087        | 12.69926    | 0.076856    | 165.2344645 |
| 10 | H08 | 22267 | CG3091        | 14.87775333 | 0.057603    | 258.2808766 |
| 10 | H09 | 20828 | CG1107        | 13.80389667 | 0.060162667 | 229.4428993 |
| 10 | H10 | 22270 | CG3488        | 17.41456667 | 0.057980333 | 300.3529933 |
| 10 | H11 | 20833 | CG1748        | 14.32714    | 0.052550333 | 272.6365199 |
| 10 | H12 | 22271 | CG3647        | 15.56430333 | 0.054617333 | 284.9700339 |
| 10 | H13 | 20834 | CG1906        | 11.95853733 | 0.057103    | 209.4204741 |
| 10 | H14 | 22263 | CG4672        | 19.34286    | 0.056371333 | 343.1329163 |
| 10 | H15 | 20837 | CG2984        | 17.33543    | 0.048024667 | 360.9692936 |
| 10 | H16 | 22264 | CG4792        | 17.54139333 | 0.045271667 | 387.4695726 |
| 10 | H17 | 20838 | CG3172        | 15.54996333 | 0.044261333 | 351.3216201 |
| 10 | H18 | 22265 | CG4886        | 15.72472    | 0.048244667 | 325.9369602 |
| 10 | H19 | 20829 | CG3870        | 15.08535    | 0.050612333 | 298.0567978 |
| 10 | H20 | 22268 | CG33133       | 15.96311    | 0.038445    | 415.2194043 |
| 10 | H21 | 20848 | CG2621        | 5.344201333 | 0.038620333 | 138.3779184 |
| 10 | H22 | 22272 | CG4434        | 16.38836667 | 0.041057667 | 399.1548472 |
| 10 | H23 | 22262 | CG1830        | 17.94024    | 0.052242333 | 343.4042635 |
| 10 | H24 | 19699 | CG6763        | 18.68299667 | 0.045713    | 408.7020468 |
| 10 | I01 | 18072 | CG32075       | 15.15880333 | 0.074593333 | 203.2192779 |
| 10 | I02 | 19032 | CG2919        | 15.79525667 | 0.074855    | 211.0113776 |
| 10 | I03 | 18114 | CG5317        | 8.931952333 | 0.103390333 | 86.39059422 |
| 10 | I04 | 19067 | CG2898        | 14.84782    | 0.064067    | 231.7545694 |
| 10 | I05 | 18091 | CG5394        | 9.233807667 | 0.081338667 | 113.522978  |
| 10 | I06 | 19042 | CG2807        | 4.090475333 | 0.044545    | 91.8279343  |
| 10 | I07 | 18082 | CG5514        | 10.38402033 | 0.085178667 | 121.9086978 |
| 10 | I08 | 19887 | CG7691        | 16.52219333 | 0.075112667 | 219.9654741 |
| 10 | I09 | 18083 | CG5603        | 15.69842333 | 0.081898333 | 191.6818413 |
| 10 | I10 | 19886 | CG7664        | 8.866745333 | 0.054073667 | 163.975293  |
| 10 | I11 | 19041 | CG1921        | 21.36566    | 0.072021    | 296.6587523 |
| 10 | I12 | 19889 | CG30132       | 18.23440333 | 0.063904    | 285.3405629 |
| 10 | I13 | 19048 | CG2198        | 17.97362667 | 0.063975333 | 280.946198  |
| 10 | I14 | 19890 | CG7773        | 17.09574333 | 0.053331    | 320.559212  |
| 10 | I15 | 19049 | CG2330        | 16.40513667 | 0.062350667 | 263.1108462 |
| 10 | I16 | 19892 | CG7839        | 13.97524333 | 0.060119    | 232.4596772 |
| 10 | I17 | 19046 | CG2053        | 19.98861667 | 0.058415667 | 342.1790387 |
| 10 | I18 | 19891 | CG7798,CG8448 | 17.55264667 | 0.042554    | 412.4793596 |
| 10 | I19 | 19047 | CG2111        | 17.12335333 | 0.053534667 | 319.8554208 |
| 10 | I20 | 19881 | CG33144       | 15.97019    | 0.061096    | 261.3950177 |
| 10 | I21 | 19051 | CG2604        | 16.95558    | 0.057491333 | 294.9241045 |
| 10 | I22 | 19894 | CG7872        | 13.79675667 | 0.037951333 | 363.5381278 |
| 10 | I23 | 19045 | CG1964        | 18.84198333 | 0.055105    | 341.9287421 |

|    |     |       |         |             |             |             |
|----|-----|-------|---------|-------------|-------------|-------------|
| 10 | I24 | 19888 | CG7718  | 17.82200667 | 0.053521333 | 332.9888393 |
| 10 | J01 | 19871 | CG7900  | 15.86450667 | 0.075488    | 210.1593189 |
| 10 | J02 | 22285 | CG4579  | 7.261252667 | 0.077418333 | 93.79241782 |
| 10 | J03 | 19896 | CG7943  | 15.45541667 | 0.072817    | 212.2501156 |
| 10 | J04 | 22269 | CG3359  | 15.81282333 | 0.076897667 | 205.6346313 |
| 10 | J05 | 20851 | CG3530  | 19.93091    | 0.088496333 | 225.2173536 |
| 10 | J06 | 22278 | CG32699 | 16.09274    | 0.067515667 | 238.3556409 |
| 10 | J07 | 20847 | CG32485 | 14.18186667 | 0.06464     | 219.3976898 |
| 10 | J08 | 22279 | CG31694 | 13.37427667 | 0.055827    | 239.5664583 |
| 10 | J09 | 20840 | CG1167  | 17.78893333 | 0.057188    | 311.0605955 |
| 10 | J10 | 22282 | CG3499  | 14.58483    | 0.070553333 | 206.7206369 |
| 10 | J11 | 20845 | CG32666 | 11.48199333 | 0.075121333 | 152.8459736 |
| 10 | J12 | 22283 | CG3662  | 17.32200333 | 0.055555    | 311.799178  |
| 10 | J13 | 20846 | CG1912  | 13.63166333 | 0.060610667 | 224.9053522 |
| 10 | J14 | 22275 | CG4699  | 19.70674667 | 0.066944    | 294.3765934 |
| 10 | J15 | 20806 | CG4041  | 16.52223333 | 0.061131667 | 270.2729082 |
| 10 | J16 | 22276 | CG4802  | 18.38615333 | 0.057644333 | 318.9585562 |
| 10 | J17 | 20850 | CG3216  | 13.3698     | 0.044765667 | 298.661921  |
| 10 | J18 | 22277 | CG4911  | 10.86346033 | 0.059184667 | 183.5519391 |
| 10 | J19 | 20796 | CG1362  | 14.17149    | 0.066401333 | 213.4217686 |
| 10 | J20 | 22280 | CG3291  | 13.92896333 | 0.049695    | 280.2890297 |
| 10 | J21 | 20860 | CG31187 | 17.71986    | 0.051191667 | 346.1473547 |
| 10 | J22 | 22320 | CG4542  | 18.66929667 | 0.053523333 | 348.8066887 |
| 10 | J23 | 22274 | CG1832  | 10.49535733 | 0.034546    | 303.8081785 |
| 10 | J24 | 19711 | CG6765  | 14.83041    | 0.043669667 | 339.6043783 |
| 10 | K02 | 19044 | CG2932  | 16.27042    | 0.061630333 | 264.0001947 |
| 10 | K03 | 18092 | CG5460  | 15.64038333 | 0.079613    | 196.4551434 |
| 10 | K04 | 19079 | CG2901  | 14.43962    | 0.081054    | 178.1481481 |
| 10 | K05 | 18103 | CG5405  | 16.92308667 | 0.076947667 | 219.9298224 |
| 10 | K06 | 19054 | CG2812  | 14.98021667 | 0.071848333 | 208.4977615 |
| 10 | K07 | 18094 | CG5517  | 17.17203    | 0.06792     | 252.8272968 |
| 10 | K08 | 19899 | CG7695  | 16.68419    | 0.070436    | 236.8702084 |
| 10 | K09 | 19026 | CG2453  | 18.30243333 | 0.063381333 | 288.7669345 |
| 10 | K1  | 18084 | CG6357  | 17.25613    | 0.069413667 | 248.5984508 |
| 10 | K10 | 19898 | CG7665  | 14.34387333 | 0.061579333 | 232.9332352 |
| 10 | K11 | 19053 | CG1922  | 16.55599667 | 0.060032667 | 275.7831292 |
| 10 | K12 | 19901 | CG7754  | 15.09465    | 0.064270333 | 234.8618595 |
| 10 | K13 | 19060 | CG2253  | 12.68325667 | 0.052376    | 242.1577949 |
| 10 | K14 | 19902 | CG7776  | 20.17635    | 0.063992667 | 315.2915959 |
| 10 | K15 | 19061 | CG2345  | 17.39216    | 0.066642333 | 260.9776568 |
| 10 | K16 | 19904 | CG7842  | 18.76269333 | 0.055151    | 340.2058591 |
| 10 | K17 | 19058 | CG2059  | 15.93438333 | 0.049563    | 321.4975553 |
| 10 | K18 | 19903 | CG7800  | 16.55659    | 0.056720667 | 291.896957  |
| 10 | K19 | 19015 | CG32654 | 10.04437567 | 0.052764333 | 190.3629788 |
| 10 | K20 | 19885 | CG31821 | 13.74777333 | 0.046628667 | 294.835223  |
| 10 | K21 | 19063 | CG2608  | 16.43591    | 0.051947667 | 316.3936141 |
| 10 | K22 | 19906 | CG7874  | 12.90488333 | 0.050624333 | 254.9146326 |
| 10 | K23 | 19057 | CG1965  | 17.34419333 | 0.064213667 | 270.1012765 |
| 10 | K24 | 19900 | CG7730  | 15.02109    | 0.047973667 | 313.1111513 |
| 10 | L01 | 19883 | CG7903  | 16.17051667 | 0.070324333 | 229.9419831 |
| 10 | L02 | 22297 | CG4599  | 20.80303667 | 0.073463    | 283.1770642 |
| 10 | L03 | 19908 | CG7949  | 12.01399667 | 0.077466667 | 155.0860155 |
| 10 | L04 | 22281 | CG3376  | 15.88696    | 0.074271333 | 213.9043328 |
| 10 | L05 | 20863 | CG3573  | 11.85405667 | 0.073271333 | 161.7830075 |

|    |     |       |               |             |             |             |
|----|-----|-------|---------------|-------------|-------------|-------------|
| 10 | L06 | 22290 | CG3006        | 15.39723    | 0.065959667 | 233.4340178 |
| 10 | L07 | 20859 | CG2201        | 12.60621333 | 0.058769667 | 214.502039  |
| 10 | L08 | 22291 | CG3156        | 14.72890333 | 0.075752    | 194.4358345 |
| 10 | L09 | 20852 | CG1225        | 15.60362    | 0.055589667 | 280.6928146 |
| 10 | L10 | 22294 | CG3523        | 23.41270667 | 0.059843333 | 391.2333315 |
| 10 | L11 | 20844 | CG1455        | 12.36525667 | 0.044519333 | 277.7502658 |
| 10 | L12 | 22295 | CG3679        | 17.01294667 | 0.062564    | 271.9286917 |
| 10 | L13 | 20842 | CG4201        | 18.70034333 | 0.051934    | 360.0790105 |
| 10 | L14 | 22287 | CG4709        | 14.58544667 | 0.045702333 | 319.1400877 |
| 10 | L15 | 20861 | CG3086        | 10.93218867 | 0.029967    | 364.8075772 |
| 10 | L16 | 22288 | CG4817        | 10.214215   | 0.112543    | 90.75833237 |
| 10 | L17 | 20862 | CG3245        | 16.47350333 | 0.060152667 | 273.8615634 |
| 10 | L18 | 22289 | CG4916        | 15.60052333 | 0.064178667 | 243.0795799 |
| 10 | L19 | 20808 | CG1389        | 14.43751667 | 0.047082    | 306.6462059 |
| 10 | L20 | 22292 | CG3308        | 14.72529333 | 0.045049    | 326.8728126 |
| 10 | L21 | 20872 | CG2794        | 15.89169333 | 0.050317333 | 315.8294027 |
| 10 | L22 | 22296 | CG32158       | 15.11896333 | 0.046154667 | 327.5717154 |
| 10 | L23 | 22286 | CG1836        | 17.88665667 | 0.052864667 | 338.348046  |
| 10 | L24 | 19723 | CG6770,CG6785 | 14.53255333 | 0.038974    | 372.8781581 |
| 10 | M01 | 18096 | CG6369        | 8.811935667 | 0.062419333 | 141.1731782 |
| 10 | M02 | 19056 | CG2937        | 19.53236333 | 0.087644667 | 222.8585501 |
| 10 | M03 | 18104 | CG5469        | 15.42834333 | 0.079326667 | 194.4912598 |
| 10 | M04 | 19052 | CG2684        | 13.67851333 | 0.060671667 | 225.4514188 |
| 10 | M05 | 18115 | CG5422        | 14.94388    | 0.071516333 | 208.9575808 |
| 10 | M06 | 19066 | CG2826        | 15.57877333 | 0.057809333 | 269.4854349 |
| 10 | M07 | 18106 | CG5519        | 16.57008333 | 0.137195333 | 120.7773102 |
| 10 | M08 | 19911 | CG31224       | 16.62947    | 0.061372    | 270.9618393 |
| 10 | M09 | 19038 | CG2488        | 16.35643    | 0.068256333 | 239.6324151 |
| 10 | M10 | 19910 | CG7668        | 15.55344    | 0.05437     | 286.0665808 |
| 10 | M11 | 19065 | CG1925        | 18.2821     | 0.050508333 | 361.9620525 |
| 10 | M12 | 19913 | CG7755        | 16.16603667 | 0.05729     | 282.1790307 |
| 10 | M13 | 19072 | CG2257        | 18.65670667 | 0.064278333 | 290.2487619 |
| 10 | M14 | 19914 | CG7778        | 15.71836    | 0.05063     | 310.4554612 |
| 10 | M15 | 19073 | CG2346        | 15.45374    | 0.060270667 | 256.4056589 |
| 10 | M16 | 19916 | CG7848        | 15.23312333 | 0.049554333 | 307.4024471 |
| 10 | M17 | 19062 | CG2525        | 15.56081    | 0.051023667 | 304.9723984 |
| 10 | M18 | 19861 | CG7634        | 14.83516667 | 0.050959    | 291.1196583 |
| 10 | M19 | 19081 | CG1986        | 15.42911    | 0.052474    | 294.0334261 |
| 10 | M20 | 19905 | CG7629        | 13.36914667 | 0.038917667 | 343.5238495 |
| 10 | M21 | 19075 | CG2616        | 18.06512333 | 0.048998333 | 368.6885268 |
| 10 | M22 | 19897 | CG7650        | 16.31315667 | 0.044409    | 367.3389778 |
| 10 | M23 | 19069 | CG1967        | 8.160449667 | 0.038439667 | 212.292415  |
| 10 | M24 | 19912 | CG7734        | 9.675063333 | 0.040679    | 237.8392619 |
| 10 | N01 | 19895 | CG7907        | 19.43938333 | 0.086542333 | 224.6228243 |
| 10 | N02 | 22309 | CG4600        | 20.61571    | 0.081305667 | 253.5580956 |
| 10 | N03 | 20807 | CG3947,CG4268 | 12.39091633 | 0.088715333 | 139.6705154 |
| 10 | N04 | 22293 | CG3394        | 16.49923    | 0.076942    | 214.4372384 |
| 10 | N05 | 20875 | CG3618        | 11.00363333 | 0.064011    | 171.9022251 |
| 10 | N06 | 22302 | CG3036        | 16.95178333 | 0.059127667 | 286.6979925 |
| 10 | N07 | 20871 | CG2204        | 16.46312333 | 0.051575333 | 319.2053695 |
| 10 | N08 | 22303 | CG3180        | 12.09746    | 0.03962     | 305.3372034 |
| 10 | N09 | 20864 | CG1227        | 13.22794    | 0.062761667 | 210.7646387 |
| 10 | N10 | 22306 | CG3558        | 17.09963    | 0.058211    | 293.7525554 |
| 10 | N11 | 20856 | CG32019       | 17.81056333 | 0.065984667 | 269.9197288 |

|    |     |       |                |             |             |             |
|----|-----|-------|----------------|-------------|-------------|-------------|
| 10 | N12 | 22307 | CG4389         | 18.23294    | 0.061650667 | 295.7460314 |
| 10 | N13 | 20854 | CG4212         | 17.21206333 | 0.055768    | 308.6369124 |
| 10 | N14 | 22299 | CG4713         | 13.74102333 | 0.057227333 | 240.1129414 |
| 10 | N15 | 20830 | CG4154         | 15.32973667 | 0.052456    | 292.239909  |
| 10 | N16 | 22300 | CG4821         | 16.41954667 | 0.058739    | 279.5339837 |
| 10 | N17 | 20867 | CG4422         | 17.88197    | 0.056594667 | 315.9656387 |
| 10 | N18 | 22301 | CG4928         | 14.23351667 | 0.048841    | 291.4255782 |
| 10 | N19 | 20865 | CG4007         | 13.86492    | 0.051676333 | 268.3030917 |
| 10 | N20 | 22304 | CG3312         | 14.72379333 | 0.053025667 | 277.6729508 |
| 10 | N21 | 22310 | CG32789,CG2947 | 15.85405333 | 0.057166    | 277.3336132 |
| 10 | N22 | 19747 | CG32045        | 13.89461    | 0.049742667 | 279.3298175 |
| 10 | N23 | 22298 | CG2943         | 17.10955    | 0.061972667 | 276.0821975 |
| 10 | N24 | 19735 | CG6772         | 17.86809667 | 0.048717667 | 366.7683181 |
| 10 | O01 | 18108 | CG6370         | 8.322918667 | 0.068323667 | 121.8160423 |
| 10 | O02 | 19076 | CG2708         | 12.83265    | 0.083375333 | 153.9142272 |
| 10 | O03 | 18116 | CG30122        | 13.81515467 | 0.073755667 | 187.3097389 |
| 10 | O04 | 19064 | CG2692         | 11.48389733 | 0.06864     | 167.3061966 |
| 10 | O05 | 18127 | CG5429         | 15.10332667 | 0.067468333 | 223.8580075 |
| 10 | O06 | 19078 | CG2830         | 13.28381333 | 0.069356    | 191.5308457 |
| 10 | O07 | 18118 | CG5520         | 16.21899667 | 0.084364333 | 192.2494498 |
| 10 | O08 | 19923 | CG30015        | 13.26323    | 0.056176667 | 236.0985581 |
| 10 | O09 | 19050 | CG2493         | 13.59299    | 0.070028333 | 194.1070043 |
| 10 | O10 | 19922 | CG7672         | 11.83462333 | 0.066427    | 178.1598346 |
| 10 | O11 | 19077 | CG1935         | 12.28565567 | 0.057508    | 213.6338538 |
| 10 | O12 | 19925 | CG7758         | 14.51444333 | 0.057819    | 251.0324173 |
| 10 | O13 | 19084 | CG2263         | 11.923366   | 0.05958     | 200.1236321 |
| 10 | O14 | 19926 | CG7779         | 14.91585    | 0.058119    | 256.6432664 |
| 10 | O15 | 19085 | CG2380         | 13.68736667 | 0.056814    | 240.9153847 |
| 10 | O16 | 19928 | CG7853         | 12.5475     | 0.056841333 | 220.7460533 |
| 10 | O17 | 19082 | CG2093         | 12.72303    | 0.038114    | 333.8151335 |
| 10 | O18 | 19927 | CG7809         | 14.14987667 | 0.051720333 | 273.5844059 |
| 10 | O19 | 19039 | CG32659        | 13.56107667 | 0.049572333 | 273.5613951 |
| 10 | O20 | 19917 | CG7631         | 13.55761    | 0.057660667 | 235.1275277 |
| 10 | O21 |       | wts            | 64.00132667 | 0.053066    | 1206.070302 |
| 10 | O22 |       | HFA17794       | 1.495537333 | 0.011621333 | 128.6889628 |
| 10 | O23 |       | hpo            | 43.39008    | 0.045932667 | 944.6453504 |
| 10 | O24 |       | Luc            | 2.204823667 | 0.050696    | 43.49107753 |
| 10 | P01 | 19907 | CG7912         | 14.25213667 | 0.079489    | 179.2969677 |
| 10 | P02 | 22321 | CG18572        | 13.34395667 | 0.083464667 | 159.8755162 |
| 10 | P03 | 20819 | CG4290         | 12.07491    | 0.083653333 | 144.3446366 |
| 10 | P04 | 22305 | CG3424         | 11.51557    | 0.078934667 | 145.8873583 |
| 10 | P05 | 20886 | CG3632         | 12.238038   | 0.070342333 | 173.9782777 |
| 10 | P06 | 22314 | CG30194        | 11.21643133 | 0.070461667 | 159.1848712 |
| 10 | P07 | 20883 | CG2272         | 15.38405667 | 0.064154667 | 239.7963775 |
| 10 | P08 | 22315 | CG3221         | 11.34105667 | 0.081759333 | 138.7126852 |
| 10 | P09 | 20880 | CG1594         | 10.07672067 | 0.055017667 | 183.1542717 |
| 10 | P10 | 22318 | CG3563         | 11.80920333 | 0.060231667 | 196.0630344 |
| 10 | P11 | 20881 | CG1817         | 13.83400333 | 0.058036667 | 238.3666073 |
| 10 | P12 | 22319 | CG4399         | 56.68530667 | 0.102770667 | 551.5708763 |
| 10 | P13 | 20882 | CG1973         | 15.23980333 | 0.054681333 | 278.7021165 |
| 10 | P14 | 22311 | CG4719         | 12.16692    | 0.056793333 | 214.2314826 |
| 10 | P15 | 20884 | CG32697        | 16.82603667 | 0.056390667 | 298.3833613 |
| 10 | P16 | 22312 | CG4827         | 8.912922667 | 0.044370333 | 200.8757203 |
| 10 | P17 | 20885 | CG3319         | 11.07068333 | 0.049290667 | 224.5999919 |

|    |     |       |          |             |             |             |
|----|-----|-------|----------|-------------|-------------|-------------|
| 10 | P18 | 22313 | CG4931   | 7.524047    | 0.053335    | 141.0714728 |
| 10 | P19 | 20832 | CG1404   | 2.223253    | 0.036274333 | 61.28997546 |
| 10 | P20 | 22316 | CG3333   | 10.613793   | 0.062323333 | 170.3020752 |
| 10 | P21 |       | wts      | 64.12894667 | 0.034203333 | 1874.932658 |
| 10 | P22 |       | HFA17794 | 1.417996    | 0.010973667 | 129.2180675 |
| 10 | P23 |       | hpo      | 44.79627333 | 0.038884667 | 1152.029249 |
| 10 | P24 |       | Luc      | 2.063348667 | 0.053165    | 38.81028245 |
| 11 | A01 |       | DIAP1    | 0.562265333 | 0.010686    | 52.61700668 |
| 11 | A02 |       | ex/ft    | 49.23835333 | 0.065692667 | 749.525873  |
| 11 | A03 |       | Luc      | 2.303710667 | 0.071302333 | 32.30905019 |
| 11 | A04 |       | hpo      | 43.57352667 | 0.063578667 | 685.34823   |
| 11 | A05 | 17221 | CG9379   | 13.29783333 | 0.061222    | 217.2067775 |
| 11 | A06 | 19366 | CG32226  | 14.89103    | 0.068904667 | 216.1106166 |
| 11 | A07 | 17220 | CG5658   | 14.95199667 | 0.06114     | 244.5534293 |
| 11 | A08 | 22418 | CG9934   | 14.82684667 | 0.071078333 | 208.5986822 |
| 11 | A09 | 17213 | CG10695  | 16.10764667 | 0.060225333 | 267.4563307 |
| 11 | A10 | 22425 | CG1236   | 13.72338667 | 0.062392333 | 219.9530925 |
| 11 | A11 | 17234 | CG1363   | 15.67834333 | 0.061937    | 253.1337219 |
| 11 | A12 | 22426 | CG1318   | 15.02064    | 0.058709    | 255.849018  |
| 11 | A13 | 19287 | CG5529   | 13.49830667 | 0.060063333 | 224.734558  |
| 11 | A14 | 22428 | CG32527  | 12.93581667 | 0.053054    | 243.8235885 |
| 11 | A15 | 19289 | CG5611   | 13.16831667 | 0.052824    | 249.2866248 |
| 11 | A16 | 22429 | CG1443   | 14.65908667 | 0.058059    | 252.4860343 |
| 11 | A17 | 19286 | CG5470   | 16.45864    | 0.055306    | 297.5923046 |
| 11 | A18 | 22422 | CG1064   | 9.923131333 | 0.078307667 | 126.7197933 |
| 11 | A19 | 19291 | CG6320   | 16.63909333 | 0.056135667 | 296.4085816 |
| 11 | A20 | 22423 | CG1093   | 15.42687667 | 0.045959667 | 335.6611957 |
| 11 | A21 | 19285 | CG5430   | 15.6553     | 0.064368667 | 243.213054  |
| 11 | A22 | 22427 | CG30499  | 14.70710333 | 0.065957333 | 222.9790471 |
| 11 | A23 | 19300 | CG31924  | 15.65994667 | 0.049498667 | 316.3710807 |
| 11 | A24 | 22420 | CG1523   | 10.74739667 | 0.051123333 | 210.224881  |
| 11 | B01 |       | DIAP1    | 0.579329667 | 0.010985667 | 52.7350487  |
| 11 | B02 |       | ex/ft    | 51.23700333 | 0.063817    | 802.8738946 |
| 11 | B03 |       | Luc      | 2.177481    | 0.075459333 | 28.85635088 |
| 11 | B04 |       | hpo      | 42.31761    | 0.061051667 | 693.1442221 |
| 11 | B05 | 22322 | CG4973   | 15.16404667 | 0.072172667 | 210.1078894 |
| 11 | B06 | 27318 | CG15266  | 14.58879    | 0.075340333 | 193.6385115 |
| 11 | B07 | 22326 | CG5656   | 13.69093667 | 0.068358667 | 200.2809202 |
| 11 | B08 | 27307 | CG6421   | 15.30476    | 0.061898333 | 247.2564151 |
| 11 | B09 | 22328 | CG5854   | 14.11139333 | 0.07165     | 196.9489649 |
| 11 | B10 | 27315 | CG11404  | 14.79048333 | 0.069441    | 212.9935245 |
| 11 | B11 | 22331 | CG6190   | 15.76747667 | 0.068618    | 229.7863049 |
| 11 | B12 | 27311 | CG7596   | 14.13193    | 0.057287333 | 246.6850729 |
| 11 | B13 | 22332 | CG9342   | 14.16000667 | 0.064750667 | 218.6851101 |
| 11 | B14 | 27358 | CG6715   | 14.09108    | 0.057672667 | 244.328567  |
| 11 | B15 | 22323 | CG9577   | 15.13980667 | 0.062884    | 240.7576914 |
| 11 | B16 | 19765 | CG10520  | 12.05508867 | 0.051740667 | 232.9905941 |
| 11 | B17 | 22327 | CG5728   | 9.249915667 | 0.054769    | 168.8896213 |
| 11 | B18 | 19763 | CG18803  | 13.51019333 | 0.050584333 | 267.0825618 |
| 11 | B19 | 22329 | CG5989   | 14.03372    | 0.061765667 | 227.2090752 |
| 11 | B20 | 19766 | CG6556   | 5.134225    | 0.053854333 | 95.33541095 |
| 11 | B21 | 22324 | CG9670   | 15.15412    | 0.057991333 | 261.3169784 |
| 11 | B22 | 19769 | CG18102  | 33.00072333 | 0.075073    | 439.5817848 |
| 11 | B23 | 22330 | CG6116   | 15.74925667 | 0.051485333 | 305.8979256 |



|    |     |       |         |             |             |             |
|----|-----|-------|---------|-------------|-------------|-------------|
| 11 | B24 | 19772 | CG3727  | 17.40517333 | 0.065701667 | 264.9122042 |
| 11 | C01 | 17212 | CG3402  | 13.24046    | 0.060872333 | 217.5119512 |
| 11 | C02 | 19283 | CG6472  | 12.71714633 | 0.067099333 | 189.5271637 |
| 11 | C03 | 17214 | CG15609 | 19.26120667 | 0.067150333 | 286.8370969 |
| 11 | C04 | 19296 | CG6504  | 14.2927     | 0.068519    | 208.5946964 |
| 11 | C05 | 17233 | CG9388  | 9.100761667 | 0.067368    | 135.0902753 |
| 11 | C06 | 19367 | CG6496  | 15.83506667 | 0.069027667 | 229.4017375 |
| 11 | C07 | 17232 | CG5734  | 14.56177    | 0.061283333 | 237.61387   |
| 11 | C08 | 22430 | CG9975  | 12.52411333 | 0.069245667 | 180.8649398 |
| 11 | C09 | 17225 | CG10701 | 15.94012667 | 0.073310667 | 217.4325701 |
| 11 | C10 | 22437 | CG1239  | 13.35675333 | 0.063726667 | 209.5944136 |
| 11 | C11 | 17246 | CG1483  | 12.37062    | 0.066743    | 185.3470776 |
| 11 | C12 | 22438 | CG32250 | 14.62801667 | 0.05403     | 270.7387871 |
| 11 | C13 | 19299 | CG5539  | 17.64389667 | 0.065596667 | 268.9755069 |
| 11 | C14 | 22440 | CG1416  | 8.767163667 | 0.045723    | 191.7451538 |
| 11 | C15 | 19301 | CG5613  | 14.31697667 | 0.052422667 | 273.1066078 |
| 11 | C16 | 22441 | CG1444  | 14.65833    | 0.057147333 | 256.5006824 |
| 11 | C17 | 19298 | CG5481  | 16.2727     | 0.051278667 | 317.3385943 |
| 11 | C18 | 22434 | CG1065  | 11.64679933 | 0.046071333 | 252.7992678 |
| 11 | C19 | 19303 | CG6322  | 11.71313667 | 0.064576    | 181.3852928 |
| 11 | C20 | 22435 | CG1100  | 1.260108    | 0.036718333 | 34.31822432 |
| 11 | C21 | 19362 | CG6312  | 16.13229333 | 0.049865667 | 323.5150438 |
| 11 | C22 | 22439 | CG1372  | 12.28765    | 0.052324333 | 234.8362457 |
| 11 | C23 | 19312 | CG5580  | 13.55178333 | 0.043929333 | 308.4905302 |
| 11 | C24 | 22432 | CG1528  | 1.338707333 | 0.044890333 | 29.82172851 |
| 11 | D01 | 22421 | CG1559  | 9.437524667 | 0.071995333 | 131.0852277 |
| 11 | D02 | 22325 | CG9761  | 12.58554333 | 0.073440667 | 171.3702218 |
| 11 | D03 | 22492 | CG1548  | 12.5709     | 0.071844667 | 174.9733221 |
| 11 | D04 | 22396 | CG9728  | 12.562818   | 0.065852667 | 190.7715911 |
| 11 | D05 | 22334 | CG4978  | 13.25777    | 0.073560667 | 180.2290626 |
| 11 | D06 | 27365 | CG14779 | 13.42075667 | 0.071763333 | 187.0141205 |
| 11 | D07 | 22338 | CG5703  | 12.367057   | 0.067099333 | 184.3096851 |
| 11 | D08 | 27319 | CG6583  | 13.11423767 | 0.050712667 | 258.5988576 |
| 11 | D09 | 22340 | CG5886  | 13.45128    | 0.066154333 | 203.3318049 |
| 11 | D10 | 27327 | CG11407 | 14.09181    | 0.052110333 | 270.4225649 |
| 11 | D11 | 22343 | CG6191  | 13.32601667 | 0.057475    | 231.8576193 |
| 11 | D12 | 27323 | CG7644  | 13.22821    | 0.053555667 | 246.9992593 |
| 11 | D13 | 22344 | CG9343  | 4.672361667 | 0.057530667 | 81.21514902 |
| 11 | D14 | 27381 | CG5069  | 12.60210667 | 0.049657    | 253.7830853 |
| 11 | D15 | 22335 | CG9578  | 11.37136    | 0.062524667 | 181.869982  |
| 11 | D16 | 19775 | CG11988 | 13.35183    | 0.058983667 | 226.3648694 |
| 11 | D17 | 22339 | CG5740  | 13.58148    | 0.056335    | 241.0842283 |
| 11 | D18 | 19773 | CG5974  | 17.57314667 | 0.041626    | 422.1675555 |
| 11 | D19 | 22405 | CG9556  | 7.638075667 | 0.047955    | 159.2758975 |
| 11 | D20 | 19767 | CG4974  | 12.10286333 | 0.043920333 | 275.5640136 |
| 11 | D21 | 22336 | CG9674  | 16.86895    | 0.049762667 | 338.9880633 |
| 11 | D22 | 19820 | CG9209  | 14.16062333 | 0.049975    | 283.3541437 |
| 11 | D23 | 22417 | CG9576  | 14.38534    | 0.050698333 | 283.7438443 |
| 11 | D24 | 19796 | CG1977  | 14.55267667 | 0.056562667 | 257.2841332 |
| 11 | E01 | 17267 | CG4574  | 21.72208667 | 0.067668667 | 321.0065712 |
| 11 | E02 | 19295 | CG6475  | 22.16312667 | 0.059837    | 370.3916752 |
| 11 | E03 | 17226 | CG33094 | 25.37211333 | 0.064822333 | 391.4100593 |
| 11 | E04 | 19308 | CG6508  | 17.47546667 | 0.062468    | 279.750699  |
| 11 | E05 | 17245 | CG9474  | 18.98877667 | 0.064230667 | 295.6341208 |

|    |     |       |                |             |             |             |
|----|-----|-------|----------------|-------------|-------------|-------------|
| 11 | E06 | 22431 | CG1486         | 15.69935333 | 0.065948333 | 238.0553464 |
| 11 | E07 | 17244 | CG5921         | 20.46166    | 0.063790333 | 320.7642746 |
| 11 | E08 | 22442 | CG9986         | 20.34338333 | 0.061958333 | 328.3397445 |
| 11 | E09 | 17237 | CG10737        | 19.41258333 | 0.056976333 | 340.7131031 |
| 11 | E10 | 22449 | CG1245         | 15.79446667 | 0.043508667 | 363.0188621 |
| 11 | E11 | 17258 | CG1484         | 19.41403667 | 0.055183    | 351.8119107 |
| 11 | E12 | 22450 | CG1332         | 17.6492     | 0.053839667 | 327.8103505 |
| 11 | E13 | 19311 | CG12752,CG5543 | 27.30622333 | 0.057805333 | 472.3824215 |
| 11 | E14 | 22452 | CG1417         | 16.81389667 | 0.055734667 | 301.6775316 |
| 11 | E15 | 19313 | CG6241         | 21.06246333 | 0.058293333 | 361.3185613 |
| 11 | E16 | 22453 | CG1448         | 20.74597    | 0.058902333 | 352.2096465 |
| 11 | E17 | 19310 | CG5485         | 15.35359    | 0.067619    | 227.0602937 |
| 11 | E18 | 22446 | CG1071         | 29.62495667 | 0.055342    | 535.3069399 |
| 11 | E19 | 19315 | CG6345         | 17.23853    | 0.048524667 | 355.2529298 |
| 11 | E20 | 22447 | CG1102         | 20.18635    | 0.05281     | 382.24484   |
| 11 | E21 | 19309 | CG5442         | 15.54241667 | 0.050818    | 305.8447138 |
| 11 | E22 | 22448 | CG1135         | 17.27861333 | 0.045191    | 382.3463374 |
| 11 | E23 | 19324 | CG5583         | 17.37270667 | 0.046154    | 376.4073898 |
| 11 | E24 | 22444 | CG1532         | 14.53070333 | 0.044511333 | 326.4495185 |
| 11 | F01 | 22433 | CG1561         | 14.76047667 | 0.078329333 | 188.4412396 |
| 11 | F02 | 22337 | CG9775         | 14.38773667 | 0.067414333 | 213.4225165 |
| 11 | F03 | 22504 | CG1552         | 15.91057    | 0.066214667 | 240.2877006 |
| 11 | F04 | 22408 | CG9735         | 14.43155333 | 0.067488    | 213.8388059 |
| 11 | F05 | 22346 | CG5625         | 11.45633    | 0.071891667 | 159.3554654 |
| 11 | F06 | 27342 | CG31640        | 16.23171333 | 0.052398333 | 309.7753745 |
| 11 | F07 | 22350 | CG5706         | 8.727809    | 0.067684333 | 128.9487326 |
| 11 | F08 | 27331 | CG6913         | 14.31735333 | 0.050596333 | 282.9721521 |
| 11 | F09 | 22352 | CG5930         | 8.083473333 | 0.028428667 | 284.3423305 |
| 11 | F10 | 27320 | CG8049         | 15.80742667 | 0.059427333 | 265.9958941 |
| 11 | F11 | 22355 | CG6198         | 16.49759333 | 0.058336    | 282.8029576 |
| 11 | F12 | 27336 | CG8673         | 15.18343    | 0.065013667 | 233.542127  |
| 11 | F13 | 22356 | CG9347         | 15.61562    | 0.061808667 | 252.6445051 |
| 11 | F14 | 27393 | CG7911         | 16.54015    | 0.053052333 | 311.7704531 |
| 11 | F15 | 22347 | CG9591         | 25.43214667 | 0.068362    | 372.0216885 |
| 11 | F16 | 19785 | CG11992        | 20.41457333 | 0.033758667 | 604.7209605 |
| 11 | F17 | 22351 | CG5748         | 17.14945667 | 0.073153667 | 234.4305822 |
| 11 | F18 | 19783 | CG6193         | 16.08794667 | 0.048536    | 331.4642053 |
| 11 | F19 | 22353 | CG6020         | 14.86693333 | 0.048459667 | 306.789839  |
| 11 | F20 | 19786 | CG7719         | 10.69388667 | 0.037594667 | 284.4522273 |
| 11 | F21 | 22348 | CG9680         | 14.07471667 | 0.054043667 | 260.4323047 |
| 11 | F22 | 19829 | CG10229        | 15.08587    | 0.041911    | 359.9501324 |
| 11 | F23 | 22354 | CG6121         | 13.01829667 | 0.051901333 | 250.8277886 |
| 11 | F24 | 19791 | CG4626         | 17.57305667 | 0.052170667 | 336.8378782 |
| 11 | G01 | 17236 | CG5784         | 16.12050333 | 0.068494667 | 235.3541395 |
| 11 | G02 | 19340 | CG6414         | 18.83920667 | 0.055783    | 337.7230817 |
| 11 | G03 | 17238 | CG15792        | 11.24131333 | 0.07153     | 157.1552262 |
| 11 | G04 | 19320 | CG6511         | 15.20409667 | 0.068037667 | 223.4658743 |
| 11 | G05 | 17257 | CG9492         | 18.14003667 | 0.066228333 | 273.901452  |
| 11 | G06 | 22443 | CG1487         | 19.44675667 | 0.058826667 | 330.5772325 |
| 11 | G07 | 17256 | CG14447        | 17.05133667 | 0.062273667 | 273.8129546 |
| 11 | G08 | 22454 | CG9998         | 16.08055333 | 0.070784667 | 227.1756595 |
| 11 | G09 | 17249 | CG10923        | 13.97090667 | 0.065158333 | 214.4147333 |
| 11 | G10 | 22461 | CG1250         | 7.570488667 | 0.075450667 | 100.3369354 |
| 11 | G11 | 17296 | CG9587         | 14.85906333 | 0.055418333 | 268.1254098 |

|    |     |       |                 |             |             |             |
|----|-----|-------|-----------------|-------------|-------------|-------------|
| 11 | G12 | 22462 | CG1333          | 17.14550667 | 0.057885    | 296.199476  |
| 11 | G13 | 19323 | CG30118         | 13.82709333 | 0.058172    | 237.6932774 |
| 11 | G14 | 22464 | CG1420          | 13.11760667 | 0.249091667 | 52.66176441 |
| 11 | G15 | 19325 | CG6246          | 16.91606333 | 0.068534333 | 246.8261164 |
| 11 | G16 | 22465 | CG1449          | 14.83915333 | 0.040919333 | 362.6440639 |
| 11 | G17 | 19322 | CG5491          | 24.76203    | 0.067320333 | 367.8239363 |
| 11 | G18 | 22458 | CG1074          | 16.45722333 | 0.049114667 | 335.0775736 |
| 11 | G19 | 19327 | CG6352          | 18.38972667 | 0.047202333 | 389.5935935 |
| 11 | G20 | 22424 | CG1121          | 17.19970667 | 0.043175667 | 398.3657461 |
| 11 | G21 | 19365 | CG5423          | 16.01854333 | 0.052131    | 307.2748141 |
| 11 | G22 | 22496 | CG1213          | 15.33872    | 0.050275333 | 305.0943471 |
| 11 | G23 | 19336 | CG5586          | 17.56018    | 0.054796667 | 320.4607336 |
| 11 | G24 | 22508 | CG1216          | 13.14133667 | 0.045134333 | 291.1605356 |
| 11 | H01 | 22445 | CG32632         | 13.72277667 | 0.064665    | 212.213356  |
| 11 | H02 | 22349 | CG9776          | 16.88972667 | 0.07627     | 221.4465277 |
| 11 | H03 | 22505 | CG1615          | 11.86825333 | 0.066388333 | 178.7701654 |
| 11 | H04 | 22409 | CG9911          | 9.522623333 | 0.068634333 | 138.7443116 |
| 11 | H05 | 22358 | CG5630          | 13.80643333 | 0.060782333 | 227.1454973 |
| 11 | H06 | 27354 | CG16969         | 14.03562667 | 0.065650667 | 213.7925992 |
| 11 | H07 | 22362 | CG5709          | 17.56693333 | 0.053691667 | 327.1817476 |
| 11 | H08 | 27326 | CG10203,CG10377 | 16.36796    | 0.069214    | 236.4833704 |
| 11 | H09 | 22364 | CG5940          | 1.135594667 | 0.020296333 | 55.95073002 |
| 11 | H10 | 27351 | CG11711         | 15.53125    | 0.055421    | 280.2412443 |
| 11 | H11 | 22367 | CG6203          | 17.80399    | 0.046601    | 382.0516727 |
| 11 | H12 | 27361 | CG32206         | 13.35840667 | 0.054430667 | 245.4205962 |
| 11 | H13 | 22368 | CG9372          | 16.07798333 | 0.057985    | 277.2783191 |
| 11 | H14 | 19761 | CG12530         | 9.884792667 | 0.053800333 | 183.7310673 |
| 11 | H15 | 22359 | CG9626          | 17.5413     | 0.050571667 | 346.8602314 |
| 11 | H16 | 19794 | CG12399         | 14.02371333 | 0.057202    | 245.1612414 |
| 11 | H17 | 22363 | CG5760          | 17.22429333 | 0.05235     | 329.0218402 |
| 11 | H18 | 19792 | CG6383          | 10.23215    | 0.045526667 | 224.7506956 |
| 11 | H19 | 22365 | CG6045          | 15.29893    | 0.055674667 | 274.7915868 |
| 11 | H20 | 19795 | CG9366          | 12.28766    | 0.043252333 | 284.0924189 |
| 11 | H21 | 22360 | CG9703          | 17.02651333 | 0.047431667 | 358.9693243 |
| 11 | H22 | 19798 | CG3208          | 17.65934    | 0.046239333 | 381.9116481 |
| 11 | H23 | 22366 | CG6126          | 17.69432333 | 0.049597667 | 356.7571727 |
| 11 | H24 | 19800 | CG4720          | 15.83128667 | 0.043106333 | 367.2612686 |
| 11 | I01 | 17248 | CG5984          | 10.119203   | 0.050101    | 201.9760683 |
| 11 | I02 | 19319 | CG6485          | 15.86674    | 0.072169    | 219.8553396 |
| 11 | I03 | 17250 | CG10724         | 32.83099    | 0.076387667 | 429.7943822 |
| 11 | I04 | 19332 | CG6524          | 15.88285    | 0.062996667 | 252.12207   |
| 11 | I05 | 17269 | CG9595          | 14.32919667 | 0.061415    | 233.3175391 |
| 11 | I06 | 22455 | CG1490          | 13.13008    | 0.069711    | 188.3501886 |
| 11 | I07 | 17268 | CG31642         | 15.54332667 | 0.066679667 | 233.1044446 |
| 11 | I08 | 22466 | CG1024          | 13.38848333 | 0.069338    | 193.0901285 |
| 11 | I09 | 17261 | CG10988         | 11.36839667 | 0.056012    | 202.9635911 |
| 11 | I10 | 22473 | CG1274          | 17.49256667 | 0.070992333 | 246.4007851 |
| 11 | I11 | 17282 | CG1825          | 12.79659667 | 0.062898667 | 203.4478208 |
| 11 | I12 | 22474 | CG1340          | 15.02491    | 0.061746333 | 243.3328295 |
| 11 | I13 | 19335 | CG5548          | 13.12118    | 0.058966    | 222.5211139 |
| 11 | I14 | 22476 | CG1430          | 10.48729133 | 0.072136333 | 145.3815414 |
| 11 | I15 | 19337 | CG6249          | 9.180173667 | 0.057977    | 158.341647  |
| 11 | I16 | 22477 | CG1461          | 17.60295667 | 0.063178    | 278.624785  |
| 11 | I17 | 19334 | CG5492          | 17.4401     | 0.058113667 | 300.1032459 |

|    |     |       |                 |             |             |             |
|----|-----|-------|-----------------|-------------|-------------|-------------|
| 11 | I18 | 22470 | CG1078          | 19.43756667 | 0.061607667 | 315.5056459 |
| 11 | I19 | 19339 | CG6358          | 7.905646667 | 0.044918667 | 175.9991392 |
| 11 | I20 | 22436 | CG1129          | 13.07271    | 0.049879    | 262.0884541 |
| 11 | I21 | 19333 | CG5454          | 15.84635667 | 0.080911667 | 195.8476116 |
| 11 | I22 | 22475 | CG1397          | 16.17693667 | 0.05626     | 287.5388672 |
| 11 | I23 | 19348 | CG5590          | 17.38188667 | 0.049671    | 349.9403408 |
| 11 | I24 | 22468 | CG1537          | 19.20882667 | 0.042806    | 448.7414537 |
| 11 | J01 | 22457 | CG1582          | 16.20318667 | 0.074364    | 217.8901978 |
| 11 | J02 | 22361 | CG9795          | 14.80283333 | 0.067371667 | 219.7189719 |
| 11 | J03 | 22333 | CG9433          | 23.73054    | 0.084042667 | 282.3630061 |
| 11 | J04 | 27317 | CG14249         | 15.9026     | 0.083765667 | 189.8462775 |
| 11 | J05 | 22370 | CG5639          | 15.36912    | 0.076887333 | 199.8914429 |
| 11 | J06 | 27366 | CG12182,CG16985 | 15.60854333 | 0.076135667 | 205.00961   |
| 11 | J07 | 22374 | CG5711          | 17.0125     | 0.066422    | 256.1274879 |
| 11 | J08 | 27333 | CG4461          | 15.32647333 | 0.068913667 | 222.4010719 |
| 11 | J09 | 22376 | CG5954          | 12.87246    | 0.119743333 | 107.5004315 |
| 11 | J10 | 27363 | CG11882         | 14.11042667 | 0.068132    | 207.1042486 |
| 11 | J11 | 22379 | CG6204          | 12.68394667 | 0.064505333 | 196.6340768 |
| 11 | J12 | 27360 | CG9027          | 16.53882667 | 0.069662    | 237.4153293 |
| 11 | J13 | 22380 | CG9373          | 10.06451867 | 0.076459333 | 131.63231   |
| 11 | J14 | 19774 | CG7926          | 4.084774667 | 0.07698     | 53.06280419 |
| 11 | J15 | 22371 | CG9633          | 15.13808667 | 0.098789333 | 153.2360444 |
| 11 | J16 | 19803 | CG13388         | 14.25427333 | 0.063668    | 223.8844213 |
| 11 | J17 | 22375 | CG5785          | 7.213716333 | 0.064229    | 112.3124497 |
| 11 | J18 | 19801 | CG6521          | 15.17534333 | 0.061799    | 245.5596908 |
| 11 | J19 | 22377 | CG6059          | 15.09422333 | 0.058638    | 257.4136794 |
| 11 | J20 | 19804 | CG16976         | 13.82483333 | 0.056972    | 242.6601371 |
| 11 | J21 | 22372 | CG31017         | 15.08142    | 0.056686333 | 266.0503708 |
| 11 | J22 | 19807 | CG6775          | 18.90181    | 0.053806    | 351.2955804 |
| 11 | J23 | 22378 | CG6137          | 14.72092667 | 0.049173667 | 299.3660564 |
| 11 | J24 | 19809 | CG4832          | 16.34079    | 0.045819333 | 356.6352631 |
| 11 | K02 | 19331 | CG6486          | 13.68038333 | 0.078216    | 174.9051771 |
| 11 | K03 | 17243 | CG4380          | 15.76212333 | 0.074878333 | 210.5031273 |
| 11 | K04 | 19330 | CG6449          | 16.73243667 | 0.065199    | 256.6364004 |
| 11 | K05 | 17281 | CG9598          | 13.06255267 | 0.064498667 | 202.5243829 |
| 11 | K06 | 22467 | CG32523         | 14.31231333 | 0.068605333 | 208.6180861 |
| 11 | K07 | 17280 | CG6053          | 13.93484667 | 0.062992667 | 221.2137921 |
| 11 | K08 | 22478 | CG1031          | 13.25088667 | 0.057154333 | 231.8439547 |
| 11 | K09 | 17273 | CG11324         | 14.86394    | 0.057152    | 260.0773376 |
| 11 | K1  | 17260 | CG9913          | 14.1696     | 0.065279333 | 217.0610402 |
| 11 | K10 | 22485 | CG1275          | 12.6224     | 0.061342333 | 205.7698055 |
| 11 | K11 | 17298 | CG11063         | 17.36305333 | 0.066298667 | 261.8914408 |
| 11 | K12 | 22486 | CG1345          | 16.23667333 | 0.078303    | 207.3569765 |
| 11 | K13 | 19347 | CG5549          | 15.52337667 | 0.059011    | 263.0590342 |
| 11 | K14 | 22488 | CG1434          | 15.45668667 | 0.052654333 | 293.5501352 |
| 11 | K15 | 19349 | CG6251          | 4.589862    | 0.048615667 | 94.41117061 |
| 11 | K16 | 22489 | CG1469          | 14.24709    | 0.055779333 | 255.4187931 |
| 11 | K17 | 19326 | CG6290          | 18.07625    | 0.060638333 | 298.0993871 |
| 11 | K18 | 22482 | CG1084          | 14.46481667 | 0.055354    | 261.3147499 |
| 11 | K19 | 19293 | CG5383          | 13.55589    | 0.044811333 | 302.5103025 |
| 11 | K20 | 22483 | CG31543         | 12.51801    | 0.048254667 | 259.4155315 |
| 11 | K21 | 19374 | CG6318          | 14.00392667 | 0.044436333 | 315.1458641 |
| 11 | K22 | 22487 | CG1399          | 16.30762667 | 0.042341333 | 385.1467439 |
| 11 | K23 | 19360 | CG5592          | 16.62057667 | 0.055669333 | 298.5589313 |

|    |     |       |                |             |             |             |
|----|-----|-------|----------------|-------------|-------------|-------------|
| 11 | K24 | 22480 | CG1542         | 9.185064333 | 0.060700667 | 151.3173551 |
| 11 | L01 | 22469 | CG1591         | 14.34929    | 0.077248    | 185.7561361 |
| 11 | L02 | 22373 | CG9805         | 4.589183333 | 0.078877    | 58.18151468 |
| 11 | L03 | 22345 | CG9448         | 13.77335    | 0.085921    | 160.3024872 |
| 11 | L04 | 27322 | CG5928         | 12.77185    | 0.062871    | 203.1437388 |
| 11 | L05 | 22382 | CG5642         | 18.43435    | 0.076167    | 242.0254178 |
| 11 | L06 | 27378 | CG17116        | 16.08525    | 0.066049667 | 243.5326446 |
| 11 | L07 | 22386 | CG5720         | 16.16043    | 0.074581667 | 216.6809985 |
| 11 | L08 | 27350 | CG30147        | 14.52010333 | 0.059138667 | 245.52639   |
| 11 | L09 | 22388 | CG5970         | 23.81666333 | 0.068710667 | 346.622504  |
| 11 | L10 | 27375 | CG12605        | 15.59658    | 0.058491667 | 266.6461889 |
| 11 | L11 | 22391 | CG6206         | 15.38440667 | 0.069147    | 222.4884184 |
| 11 | L12 | 27371 | CG7866         | 14.75864333 | 0.058232333 | 253.4441347 |
| 11 | L13 | 22392 | CG9393         | 15.54645667 | 0.06043     | 257.2638866 |
| 11 | L14 | 19781 | CG11525,CG1775 | 11.52468267 | 0.050047667 | 230.2741253 |
| 11 | L15 | 22383 | CG9634         | 16.72529333 | 0.055597333 | 300.8290565 |
| 11 | L16 | 19812 | CG17800        | 13.64471    | 0.046711    | 292.1091392 |
| 11 | L17 | 22387 | CG5792         | 15.36591667 | 0.049815667 | 308.455506  |
| 11 | L18 | 19810 | CG6721         | 31.28715333 | 0.049637    | 630.3191839 |
| 11 | L19 | 22389 | CG6084         | 13.73367333 | 0.045485667 | 301.9340891 |
| 11 | L20 | 19813 | CG3936         | 14.36703667 | 0.054358333 | 264.3023762 |
| 11 | L21 | 22384 | CG9715         | 12.39611667 | 0.055785333 | 222.2110352 |
| 11 | L22 | 19816 | CG9012         | 20.48248    | 0.046291333 | 442.4690007 |
| 11 | L23 | 22390 | CG6145         | 14.55955667 | 0.047723    | 305.0846901 |
| 11 | L24 | 19818 | CG5020         | 16.70545667 | 0.047063    | 354.9594515 |
| 11 | M01 | 17272 | CG9968         | 15.25899333 | 0.067928333 | 224.6337071 |
| 11 | M02 | 19343 | CG32066        | 18.87127667 | 0.075834333 | 248.8487185 |
| 11 | M03 | 17255 | CG4560         | 11.36669    | 0.070271667 | 161.753528  |
| 11 | M04 | 19342 | CG6453         | 12.79498333 | 0.071726    | 178.3869634 |
| 11 | M05 | 17293 | CG9602         | 14.35022    | 0.060405333 | 237.5654468 |
| 11 | M06 | 22479 | CG1517         | 13.14261    | 0.056402667 | 233.0139828 |
| 11 | M07 | 17291 | CG4697         | 15.27111333 | 0.060900333 | 250.7558251 |
| 11 | M08 | 22490 | CG1041         | 15.76614667 | 0.069459    | 226.984936  |
| 11 | M09 | 17303 | CG4943         | 14.05252    | 0.061544333 | 228.3316634 |
| 11 | M10 | 22497 | CG32311        | 15.18800333 | 0.058302    | 260.5057002 |
| 11 | M11 | 19341 | CG5414         | 13.36256333 | 0.060152667 | 222.1441554 |
| 11 | M12 | 22498 | CG1349         | 16.24969667 | 0.059971667 | 270.9562293 |
| 11 | M13 | 19359 | CG5550         | 13.59106667 | 0.059079667 | 230.0464345 |
| 11 | M14 | 22500 | CG1435         | 16.03722    | 0.055554333 | 288.6763109 |
| 11 | M15 | 19361 | CG6255         | 14.99253667 | 0.052011    | 288.2570354 |
| 11 | M16 | 22501 | CG1471         | 15.034      | 0.055193667 | 272.3863245 |
| 11 | M17 | 19358 | CG5521         | 14.92638    | 0.048710333 | 306.4314896 |
| 11 | M18 | 22494 | CG1086         | 15.46491667 | 0.044740333 | 345.6593976 |
| 11 | M19 | 19305 | CG5392         | 15.91029333 | 0.057156    | 278.3661091 |
| 11 | M20 | 22495 | CG1116         | 16.71672    | 0.053162    | 314.4486663 |
| 11 | M21 | 19357 | CG5463         | 15.59975    | 0.044709667 | 348.9122412 |
| 11 | M22 | 22499 | CG1401         | 18.07156    | 0.047827333 | 377.8500439 |
| 11 | M23 | 19372 | CG5610         | 15.23641333 | 0.049686667 | 306.6499396 |
| 11 | M24 | 22503 | CG1522         | 19.06593667 | 0.054155667 | 352.0580179 |
| 11 | N01 | 22481 | CG1600         | 17.45548333 | 0.086127333 | 202.6706582 |
| 11 | N02 | 22385 | CG9813         | 14.00625667 | 0.072687333 | 192.6918491 |
| 11 | N03 | 22381 | CG9520         | 14.65938667 | 0.075074667 | 195.2640926 |
| 11 | N04 | 27334 | CG5977         | 14.20361667 | 0.065341667 | 217.3745696 |
| 11 | N05 | 22394 | CG5643         | 16.58451667 | 0.080147333 | 206.9253708 |

|    |     |       |                |             |             |             |
|----|-----|-------|----------------|-------------|-------------|-------------|
| 11 | N06 | 27389 | CG17328        | 14.36520667 | 0.06254     | 229.696301  |
| 11 | N07 | 22398 | CG32429,CG5725 | 16.41011    | 0.068303    | 240.2546008 |
| 11 | N08 | 27385 | CG11293        | 16.17367667 | 0.059825    | 270.349798  |
| 11 | N09 | 22400 | CG5973         | 17.80761    | 0.060652667 | 293.5997868 |
| 11 | N10 | 27368 | CG3694         | 15.69204    | 0.059582667 | 263.3658558 |
| 11 | N11 | 22403 | CG6223         | 1.507985667 | 0.090067667 | 16.74280818 |
| 11 | N12 | 27396 | CG30077        | 20.15839333 | 0.061046333 | 330.2146457 |
| 11 | N13 | 22404 | CG9423         | 5.742559667 | 0.077216667 | 74.36943233 |
| 11 | N14 | 19793 | CG8384         | 15.39291667 | 0.052111    | 295.3870904 |
| 11 | N15 | 22395 | CG9649         | 13.29757433 | 0.053361    | 249.2002461 |
| 11 | N16 | 19821 | CG1200         | 14.15959    | 0.051638    | 274.2087223 |
| 11 | N17 | 22399 | CG5815         | 16.88927    | 0.05643     | 299.2959419 |
| 11 | N18 | 19819 | CG6794         | 16.56870333 | 0.045232333 | 366.3022027 |
| 11 | N19 | 22401 | CG33129        | 16.87840333 | 0.055599667 | 303.5702252 |
| 11 | N20 | 19808 | CG2671         | 9.038857667 | 0.046651333 | 193.753469  |
| 11 | N21 | 22414 | CG6186         | 15.25578667 | 0.047210333 | 323.1450742 |
| 11 | N22 | 19825 | CG12244        | 19.47113333 | 0.038973    | 499.6057099 |
| 11 | N23 | 22402 | CG6169         | 9.204052    | 0.024560667 | 374.7476453 |
| 11 | N24 | 19814 | CG3715         | 7.369442667 | 0.051247    | 143.802421  |
| 11 | O01 | 17279 | CG4684         | 16.49616333 | 0.091905333 | 179.4908166 |
| 11 | O02 | 19355 | CG6492         | 14.167011   | 0.088631667 | 159.8414148 |
| 11 | O03 | 17286 | CG10859        | 13.27748667 | 0.059209667 | 224.2452527 |
| 11 | O04 | 19354 | CG6462         | 11.16056333 | 0.069931    | 159.5939331 |
| 11 | O05 | 17305 | CG9614         | 14.95255    | 0.064557    | 231.6177951 |
| 11 | O06 | 22491 | CG33181        | 13.13024667 | 0.071831667 | 182.7918977 |
| 11 | O07 | 17304 | CG6235         | 8.448885333 | 0.056218333 | 150.2870119 |
| 11 | O08 | 22502 | CG32465        | 11.364368   | 0.068098667 | 166.8809179 |
| 11 | O09 | 17297 | CG14838        | 13.76127333 | 0.06553     | 209.9995931 |
| 11 | O10 | 22509 | CG1311         | 12.64446    | 0.063118    | 200.3304921 |
| 11 | O11 | 19353 | CG5418         | 11.41222667 | 0.060572333 | 188.4065883 |
| 11 | O12 | 22510 | CG1354         | 14.55969    | 0.068325667 | 213.0925421 |
| 11 | O13 | 19371 | CG5558         | 14.10013667 | 0.059493    | 237.0049698 |
| 11 | O14 | 22512 | CG1440         | 14.62729333 | 0.057521667 | 254.29189   |
| 11 | O15 | 19314 | CG6282         | 14.99380333 | 0.057146    | 262.3771276 |
| 11 | O16 | 22513 | CG1474         | 12.45406    | 0.068123    | 182.817257  |
| 11 | O17 | 19370 | CG5527         | 16.75731    | 0.055748    | 300.5903351 |
| 11 | O18 | 22484 | CG1208         | 13.84067    | 0.054267    | 255.0476348 |
| 11 | O19 | 19338 | CG6298         | 15.47983667 | 0.060332333 | 256.5761311 |
| 11 | O20 | 22507 | CG1119         | 8.991258333 | 0.058993    | 152.4122919 |
| 11 | O21 |       | wts            | 72.04657    | 0.044239    | 1628.575917 |
| 11 | O22 |       | HFA17794       | 1.748917    | 0.012748    | 137.191481  |
| 11 | O23 |       | hpo            | 42.25248667 | 0.047783333 | 884.2515521 |
| 11 | O24 |       | Luc            | 2.861824333 | 0.057181333 | 50.04822669 |
| 11 | P01 | 22493 | CG1607         | 14.976      | 0.089378    | 167.558012  |
| 11 | P02 | 22397 | CG9861         | 13.2695     | 0.084998667 | 156.1142136 |
| 11 | P03 | 22369 | CG31332        | 13.37545333 | 0.072594667 | 184.2484296 |
| 11 | P04 | 27353 | CG14757        | 12.69706333 | 0.064041333 | 198.2635694 |
| 11 | P05 | 22406 | CG5651         | 3.63746     | 0.080576333 | 45.14303207 |
| 11 | P06 | 27399 | CG14248        | 12.96134333 | 0.077213333 | 167.8640563 |
| 11 | P07 | 22410 | CG5726         | 11.85084667 | 0.080685    | 146.877941  |
| 11 | P08 | 27374 | CG11186        | 11.90005933 | 0.066349    | 179.355519  |
| 11 | P09 | 22412 | CG5978         | 12.80550667 | 0.078096333 | 163.9706516 |
| 11 | P10 | 27380 | CG18361        | 12.61716667 | 0.063703    | 198.0623623 |
| 11 | P11 | 22415 | CG6230         | 11.553143   | 0.070310333 | 164.3164305 |

|    |     |       |                 |             |             |             |
|----|-----|-------|-----------------|-------------|-------------|-------------|
| 11 | P12 | 27394 | CG8179          | 10.90244233 | 0.049036667 | 222.3324519 |
| 11 | P13 | 22416 | CG9429          | 15.62122333 | 0.064800333 | 241.0670213 |
| 11 | P14 | 19826 | CG3497          | 14.75583333 | 0.049582    | 297.6046415 |
| 11 | P15 | 22407 | CG9660          | 14.22762667 | 0.061876333 | 229.9364862 |
| 11 | P16 | 19830 | CG18492         | 15.05271667 | 0.053357333 | 282.1114873 |
| 11 | P17 | 22393 | CG9554          | 12.83699667 | 0.060179    | 213.313559  |
| 11 | P18 | 19832 | CG31058         | 9.872682    | 0.052602333 | 187.6852484 |
| 11 | P19 | 22413 | CG6091          | 19.17427333 | 0.048157    | 398.1617072 |
| 11 | P20 | 19817 | CG3412          | 8.495629    | 0.116126333 | 73.15850554 |
| 11 | P21 |       | wts             | 62.65904    | 0.044816667 | 1398.119152 |
| 11 | P22 |       | HFA17794        | 1.429289667 | 0.010565    | 135.2853447 |
| 11 | P23 |       | hpo             | 44.56985    | 0.045686333 | 975.5619843 |
| 11 | P24 |       | Luc             | 2.079729667 | 0.051926667 | 40.05128386 |
| 12 | A01 |       | DIAP1           | 0.459254    | 0.009626667 | 47.70644044 |
| 12 | A02 |       | ex/ft           | 41.49929    | 0.049688333 | 835.1918291 |
| 12 | A03 |       | Luc             | 1.576163667 | 0.066333    | 23.76138071 |
| 12 | A04 |       | hpo             | 36.13406333 | 0.066264667 | 545.2991036 |
| 12 | A05 | 19384 | CG2412          | 14.06824167 | 0.067690333 | 207.8323591 |
| 12 | A06 | 19942 | CG2750          | 11.40703833 | 0.064536333 | 176.7537408 |
| 12 | A07 | 19385 | CG2709          | 15.77965667 | 0.070434333 | 224.0335916 |
| 12 | A08 | 24437 | CG13777         | 14.12125667 | 0.057987667 | 243.5217259 |
| 12 | A09 | 19387 | CG3709          | 12.45105667 | 0.051222667 | 243.0770883 |
| 12 | A10 | 24439 | CG15825         | 13.56044667 | 0.053262667 | 254.5957143 |
| 12 | A11 | 19386 | CG2854          | 13.99218667 | 0.057944    | 241.4777486 |
| 12 | A12 | 24434 | CG12172         | 12.10447333 | 0.05922     | 204.3984014 |
| 12 | A13 | 19388 | CG3773          | 13.74426    | 0.051596667 | 266.3788358 |
| 12 | A14 | 24435 | CG12238         | 3.992780333 | 0.053770667 | 74.25573423 |
| 12 | A15 | 19936 | CG8046          | 12.20506333 | 0.053552667 | 227.9076672 |
| 12 | A16 | 24438 | CG15629         | 14.84916    | 0.050717667 | 292.7808193 |
| 12 | A17 | 19934 | CG7996          | 14.03785667 | 0.045157    | 310.8677872 |
| 12 | A18 | 24430 | CG10725         | 13.75846    | 0.047464333 | 289.8694458 |
| 12 | A19 | 19929 | CG7951          | 11.48941533 | 0.040920667 | 280.7729265 |
| 12 | A20 | 24429 | CG11334         | 12.72331667 | 0.046362333 | 274.4321899 |
| 12 | A21 | 19949 | CG1934          | 11.58882667 | 0.046842333 | 247.400713  |
| 12 | A22 | 24445 | CG12141         | 7.436508667 | 0.051786333 | 143.5998301 |
| 12 | A23 | 19935 | CG32536,CG32537 | 17.26609    | 0.045925333 | 375.9600366 |
| 12 | A24 | 24452 | CG10672         | 16.97193333 | 0.047710333 | 355.7286681 |
| 12 | B01 |       | DIAP1           | 0.553578333 | 0.011964    | 46.27033879 |
| 12 | B02 |       | ex/ft           | 47.48676333 | 0.072455667 | 655.3906067 |
| 12 | B03 |       | Luc             | 2.613494333 | 0.077028333 | 33.92900015 |
| 12 | B04 |       | hpo             | 45.26060667 | 0.059338667 | 762.7506516 |
| 12 | B05 | 22037 | CG18656         | 10.861059   | 0.056209333 | 193.225188  |
| 12 | B06 | 23866 | CG4471          | 11.77675667 | 0.059133    | 199.1570978 |
| 12 | B07 | 22046 | CG31974,CG31975 | 14.33800333 | 0.061439    | 233.369738  |
| 12 | B08 | 23856 | CG3217          | 15.78587    | 0.065193    | 242.1405672 |
| 12 | B09 | 22055 | CG32242,CG32244 | 15.0232     | 0.064239667 | 233.8617365 |
| 12 | B10 | 23860 | CG3323          | 13.89187    | 0.061940333 | 224.278257  |
| 12 | B11 | 22080 | CG18468         | 13.89125667 | 0.062421    | 222.541399  |
| 12 | B12 | 23862 | CG3509          | 11.99523667 | 0.054       | 222.1340123 |
| 12 | B13 | 16545 | CG12997         | 11.987797   | 0.057158    | 209.7308688 |
| 12 | B14 | 23865 | CG4394          | 6.004495667 | 0.034698667 | 173.0468702 |
| 12 | B15 | 16546 | CG13035         | 15.26025333 | 0.057363    | 266.0295545 |
| 12 | B16 | 23858 | CG4712          | 13.90297333 | 0.050653333 | 274.4730192 |
| 12 | B17 | 16539 | CG12877         | 12.86069    | 0.055055333 | 233.5957158 |

|    |     |       |                 |             |             |             |
|----|-----|-------|-----------------|-------------|-------------|-------------|
| 12 | B18 | 23873 | CG32036,CG32037 | 11.75802333 | 0.052251333 | 225.028197  |
| 12 | B19 | 16544 | CG12959         | 14.24887    | 0.054838667 | 259.8325391 |
| 12 | B20 | 23875 | CG3568          | 14.60724    | 0.046706    | 312.7486833 |
| 12 | B21 | 16549 | CG13220         | 12.67417667 | 0.046371333 | 273.3192202 |
| 12 | B22 | 23876 | CG13506,CG3624  | 10.63197667 | 0.038917    | 273.1962039 |
| 12 | B23 | 16540 | CG13873         | 10.634645   | 0.046015333 | 231.1108978 |
| 12 | B24 | 23915 | CG4616          | 15.08682333 | 0.049862333 | 302.5695415 |
| 12 | C01 | 19391 | CG3920          | 12.06519867 | 0.053477667 | 225.6119128 |
| 12 | C02 | 19939 | CG2213          | 11.47129667 | 0.072349333 | 158.5542829 |
| 12 | C03 | 19390 | CG3883          | 14.96748    | 0.057677    | 259.5051754 |
| 12 | C04 | 19931 | CG2931          | 9.452206667 | 0.070812    | 133.4831196 |
| 12 | C05 | 19396 | CG2444          | 11.10464433 | 0.057899333 | 191.7922659 |
| 12 | C06 | 20023 | CG2374          | 13.13134    | 0.053768333 | 244.2206999 |
| 12 | C07 | 19397 | CG2711          | 11.41761733 | 0.052515333 | 217.4149264 |
| 12 | C08 | 24449 | CG14472         | 11.00891667 | 0.057164333 | 192.5836623 |
| 12 | C09 | 19399 | CG3051,CG3719   | 14.85990667 | 0.066924    | 222.0415197 |
| 12 | C10 | 24451 | CG16705         | 12.19449    | 0.055305333 | 220.4939246 |
| 12 | C11 | 19380 | CG3955          | 13.45503    | 0.054238    | 248.0738597 |
| 12 | C12 | 24446 | CG12182         | 14.07956333 | 0.057884333 | 243.2361664 |
| 12 | C13 | 19472 | CG3849          | 13.1076     | 0.061497    | 213.1421045 |
| 12 | C14 | 24447 | CG12263         | 13.63437    | 0.061502667 | 221.6874607 |
| 12 | C15 | 19948 | CG30344         | 16.83484    | 0.045443    | 370.460577  |
| 12 | C16 | 24450 | CG15669         | 13.12347667 | 0.043342    | 302.7889038 |
| 12 | C17 | 19946 | CG7997          | 13.48348333 | 0.052318667 | 257.7184052 |
| 12 | C18 | 24442 | CG10728         | 13.72001    | 0.046372    | 295.868412  |
| 12 | C19 | 19941 | CG7953          | 12.71098    | 0.044960333 | 282.7154306 |
| 12 | C20 | 24441 | CG11347         | 14.65344667 | 0.045914333 | 319.1475429 |
| 12 | C21 | 19961 | CG1943          | 13.72370333 | 0.045558667 | 301.2314525 |
| 12 | C22 | 24457 | CG12143         | 12.36705833 | 0.044098667 | 280.4406407 |
| 12 | C23 | 19947 | CG8025          | 8.189518333 | 0.043073667 | 190.1281912 |
| 12 | C24 | 24464 | CG10646,CG10681 | 15.48121333 | 0.048044333 | 322.2276647 |
| 12 | D01 | 22047 | CG17855,CG3811  | 11.69311467 | 0.059121    | 197.7827619 |
| 12 | D02 | 16541 | CG13906         | 12.75910633 | 0.060632333 | 210.4340313 |
| 12 | D03 | 22053 | CG18112         | 14.84567667 | 0.060237    | 246.4544494 |
| 12 | D04 | 16542 | CG13941         | 15.61767333 | 0.055384667 | 281.9855074 |
| 12 | D05 | 22049 | CG18661         | 14.56153    | 0.073823    | 197.2492313 |
| 12 | D06 | 23878 | CG4480          | 12.51593333 | 0.062047667 | 201.7148107 |
| 12 | D07 | 22057 | CG18531         | 12.81103167 | 0.058720667 | 218.1690433 |
| 12 | D08 | 23868 | CG3223          | 15.08576333 | 0.048295333 | 312.3648248 |
| 12 | D09 | 22066 | CG14028         | 9.726792667 | 0.049288    | 197.3460612 |
| 12 | D10 | 23872 | CG3338          | 10.01751033 | 0.051563    | 194.2771044 |
| 12 | D11 | 22092 | CG18469         | 12.81696    | 0.049637    | 258.2138324 |
| 12 | D12 | 23874 | CG3520          | 11.924095   | 0.056421667 | 211.338936  |
| 12 | D13 | 16557 | CG12998         | 16.03479333 | 0.055595    | 288.4215007 |
| 12 | D14 | 23877 | CG4385,CG4426   | 12.38837    | 0.048745333 | 254.1447386 |
| 12 | D15 | 16543 | CG30005         | 10.67882533 | 0.052955    | 201.6584899 |
| 12 | D16 | 23870 | CG4714          | 13.01854333 | 0.050295333 | 258.8419734 |
| 12 | D17 | 16551 | CG12879         | 13.29633    | 0.045878333 | 289.8171977 |
| 12 | D18 | 23885 | CG3430,CG9200   | 10.47763    | 0.049560333 | 211.4116128 |
| 12 | D19 | 16556 | CG12985         | 13.15986633 | 0.053576333 | 245.6283496 |
| 12 | D20 | 23887 | CG3579          | 12.96521333 | 0.042929    | 302.0152655 |
| 12 | D21 | 16627 | CG12956         | 11.28076667 | 0.040092    | 281.372011  |
| 12 | D22 | 23888 | CG3638          | 11.53899367 | 0.039907667 | 289.1422784 |
| 12 | D23 | 16552 | CG13874         | 9.384387333 | 0.041439    | 226.4626881 |



|    |     |       |                 |             |             |             |
|----|-----|-------|-----------------|-------------|-------------|-------------|
| 12 | D24 | 23927 | CG4617          | 13.76784667 | 0.046359667 | 296.9789832 |
| 12 | E01 | 19403 | CG3923          | 14.76162333 | 0.071579    | 206.2284096 |
| 12 | E02 | 19956 | CG3898          | 16.53307    | 0.051136333 | 323.3135605 |
| 12 | E03 | 19402 | CG3884          | 14.69325667 | 0.058098667 | 252.9017878 |
| 12 | E04 | 19964 | CG2533          | 16.82174333 | 0.059556333 | 282.4509568 |
| 12 | E05 | 19408 | CG2467          | 16.61508667 | 0.062743667 | 264.8089847 |
| 12 | E06 | 19966 | CG2839          | 16.73557667 | 0.058374333 | 286.694095  |
| 12 | E07 | 19467 | CG31482,CG31484 | 18.21315333 | 0.052139    | 349.3191916 |
| 12 | E08 | 24461 | CG14648         | 20.36864333 | 0.052518    | 387.8411846 |
| 12 | E09 | 19411 | CG3733          | 18.00351667 | 0.063785667 | 282.250192  |
| 12 | E10 | 24463 | CG16740         | 19.03863667 | 0.052983667 | 359.3302968 |
| 12 | E11 | 19410 | CG2865          | 16.65749667 | 0.054040667 | 308.2400291 |
| 12 | E12 | 24458 | CG12189         | 18.97164667 | 0.057395667 | 330.5414462 |
| 12 | E13 | 19412 | CG3814          | 18.09978667 | 0.046420333 | 389.9107431 |
| 12 | E14 | 24459 | CG12340         | 15.3167     | 0.049875333 | 307.0997019 |
| 12 | E15 | 19960 | CG8055          | 5.374995667 | 0.180584    | 29.76451771 |
| 12 | E16 | 24472 | CG13366         | 16.93172    | 0.049153333 | 344.467381  |
| 12 | E17 | 19958 | CG8002          | 20.47284667 | 0.05572     | 367.4236659 |
| 12 | E18 | 24484 | CG13442         | 15.91829    | 0.039870667 | 399.2481524 |
| 12 | E19 | 19953 | CG7959          | 16.45676667 | 0.048948667 | 336.2045953 |
| 12 | E20 | 24453 | CG11352         | 17.68178    | 0.056254    | 314.3204039 |
| 12 | E21 | 19973 | CG1958          | 19.3882     | 0.041019333 | 472.6600465 |
| 12 | E22 | 24469 | CG32721         | 17.32005    | 0.041388333 | 418.4766238 |
| 12 | E23 | 19959 | CG8026          | 14.86056    | 0.043998333 | 337.7527937 |
| 12 | E24 | 24476 | CG10687         | 13.83145    | 0.038077    | 363.2494682 |
| 12 | F01 | 22058 | CG17867         | 16.06408333 | 0.074756667 | 214.8849601 |
| 12 | F02 | 16553 | CG13913         | 15.30086667 | 0.069047333 | 221.5996756 |
| 12 | F03 | 22064 | CG32384         | 15.51991    | 0.057788    | 268.5663113 |
| 12 | F04 | 16576 | CG13893         | 14.43121    | 0.056662333 | 254.6878879 |
| 12 | F05 | 22060 | CG32983,CG32988 | 13.39101333 | 0.071669667 | 186.8435275 |
| 12 | F06 | 23890 | CG4482          | 16.05598667 | 0.060292    | 266.3037661 |
| 12 | F07 | 22062 | CG17944         | 13.62897667 | 0.072380667 | 188.2958156 |
| 12 | F08 | 23880 | CG3227          | 15.14906667 | 0.055649    | 272.225317  |
| 12 | F09 | 22052 | CG18013         | 13.83541333 | 0.051294    | 269.7277134 |
| 12 | F10 | 23884 | CG3263,CG3354   | 14.14827333 | 0.044058333 | 321.1259315 |
| 12 | F11 | 16560 | CG13183         | 13.6394     | 0.044392333 | 307.2467468 |
| 12 | F12 | 23879 | CG4547          | 13.54757333 | 0.051839667 | 261.3360425 |
| 12 | F13 | 16569 | CG13001         | 13.67698333 | 0.049878333 | 274.2069035 |
| 12 | F14 | 23889 | CG4444          | 15.40717333 | 0.040809    | 377.5435157 |
| 12 | F15 | 16555 | CG12933         | 14.27006    | 0.046485667 | 306.9776347 |
| 12 | F16 | 23882 | CG4730          | 15.56610667 | 0.050943667 | 305.5552866 |
| 12 | F17 | 16563 | CG12892         | 23.19018667 | 0.051292    | 452.1209285 |
| 12 | F18 | 23897 | CG3440          | 12.90800667 | 0.057321    | 225.1880928 |
| 12 | F19 | 16568 | CG12986         | 10.71010167 | 0.046308333 | 231.2780637 |
| 12 | F20 | 23899 | CG3582          | 12.51231667 | 0.067156    | 186.3171819 |
| 12 | F21 | 16573 | CG13224         | 14.48083333 | 0.046599333 | 310.7519421 |
| 12 | F22 | 23900 | CG3652          | 14.35942667 | 0.042271333 | 339.6965635 |
| 12 | F23 | 16550 | CG13282         | 15.14115667 | 0.042021667 | 360.3178519 |
| 12 | F24 | 23939 | CG4621          | 23.07470667 | 0.042003667 | 549.3498187 |
| 12 | G01 | 19415 | CG31410         | 15.79741667 | 0.054316667 | 290.8392145 |
| 12 | G02 | 19963 | CG2245          | 14.28030333 | 0.055447333 | 257.5471619 |
| 12 | G03 | 19414 | CG3887          | 13.73227    | 0.065985333 | 208.1109438 |
| 12 | G04 | 19976 | CG2652          | 13.16920667 | 0.068954667 | 190.9835447 |
| 12 | G05 | 19420 | CG2519          | 12.30949667 | 0.051005    | 241.3390191 |

|    |     |       |                      |             |             |             |
|----|-----|-------|----------------------|-------------|-------------|-------------|
| 12 | G06 | 20015 | CG3771               | 15.52017    | 0.059998333 | 258.6766855 |
| 12 | G07 | 19421 | CG2762               | 4.381183333 | 0.128876333 | 33.99525126 |
| 12 | G08 | 24473 | CG14685              | 14.40080333 | 0.060866    | 236.5984841 |
| 12 | G09 | 19423 | CG3746               | 15.86315333 | 0.054060333 | 293.4342494 |
| 12 | G10 | 24475 | CG16758              | 15.09334667 | 0.062176333 | 242.7506715 |
| 12 | G11 | 19422 | CG2904               | 17.52081667 | 0.06222     | 281.5946105 |
| 12 | G12 | 24470 | CG30426              | 15.19635667 | 0.049485333 | 307.0880934 |
| 12 | G13 | 19464 | CG3997               | 1.629156667 | 0.043157    | 37.74953464 |
| 12 | G14 | 24471 | CG12359              | 7.960444    | 0.105049667 | 75.77790823 |
| 12 | G15 | 19972 | CG32177,CG32179      | 16.11987667 | 0.051430667 | 313.429277  |
| 12 | G16 | 24474 | CG15738              | 15.73161    | 0.044883333 | 350.5000371 |
| 12 | G17 | 19970 | CG8005               | 14.06281    | 0.054789    | 256.6721422 |
| 12 | G18 | 24466 | CG17348              | 15.37197667 | 0.050604667 | 303.76599   |
| 12 | G19 | 19965 | CG7963               | 15.58268667 | 0.054719    | 284.7765249 |
| 12 | G20 | 24508 | CG13604              | 14.65701333 | 0.039127    | 374.6010002 |
| 12 | G21 | 19985 | CG1978               | 16.88888333 | 0.048502333 | 348.2076464 |
| 12 | G22 | 24481 | CG12157              | 10.11734067 | 0.045728333 | 221.2488392 |
| 12 | G23 | 20019 | CG8043               | 18.89648333 | 0.047326333 | 399.2805274 |
| 12 | G24 | 24488 | CG10689              | 14.46477333 | 0.051271667 | 282.1202093 |
| 12 | H01 | 22070 | CG17868              | 14.32681    | 0.060841333 | 235.4782385 |
| 12 | H02 | 16565 | CG13916              | 14.57240333 | 0.072346    | 201.4265244 |
| 12 | H03 | 22067 | CG18416              | 13.62161667 | 0.075065667 | 181.4626749 |
| 12 | H04 | 16625 | CG13933              | 11.025727   | 0.060834667 | 181.240855  |
| 12 | H05 | 22077 | CG18266              | 12.67607667 | 0.060263333 | 210.3447646 |
| 12 | H06 | 23902 | CG4497               | 11.001618   | 0.054938333 | 200.2539453 |
| 12 | H07 | 22081 | CG18540              | 12.49525333 | 0.066237667 | 188.6427159 |
| 12 | H08 | 23892 | CG3246               | 16.59064333 | 0.057092333 | 290.5931911 |
| 12 | H09 | 22050 | CG6874               | 17.15142    | 0.054888667 | 312.4765282 |
| 12 | H10 | 23896 | CG3363               | 5.419892    | 0.057497333 | 94.26336294 |
| 12 | H11 | 16572 | CG13189              | 12.94878333 | 0.052054667 | 248.753554  |
| 12 | H12 | 23891 | CG32743              | 10.31047967 | 0.042937    | 240.1304159 |
| 12 | H13 | 16581 | CG13016              | 14.57175333 | 0.052863667 | 275.6477984 |
| 12 | H14 | 23901 | CG4449               | 15.36553333 | 0.049421    | 310.9110162 |
| 12 | H15 | 16582 | CG13095              | 12.64777667 | 0.050569333 | 250.107641  |
| 12 | H16 | 23881 | CG4669               | 15.81244    | 0.048274667 | 327.5515108 |
| 12 | H17 | 16575 | CG11763,CG12895      | 12.95918333 | 0.048587333 | 266.7193782 |
| 12 | H18 | 23909 | CG3441               | 15.37785333 | 0.044538667 | 345.2697282 |
| 12 | H19 | 16591 | CG31412,CG31415      | 13.34261333 | 0.042638333 | 312.925302  |
| 12 | H20 | 23911 | CG3588               | 14.01065    | 0.042474333 | 329.8615635 |
| 12 | H21 | 16632 | CG13216              | 13.86692333 | 0.03948     | 351.2391928 |
| 12 | H22 | 23912 | CG3669               | 15.69245667 | 0.039610333 | 396.1707804 |
| 12 | H23 | 16634 | CG13867              | 8.820386333 | 0.032566667 | 270.8409314 |
| 12 | H24 | 16347 | CG10353              | 16.87061667 | 0.044054667 | 382.947323  |
| 12 | I01 | 19427 | CG3934               | 15.88443333 | 0.071888333 | 220.9598219 |
| 12 | I02 | 19975 | CG2262               | 14.08906667 | 0.064581667 | 218.1589202 |
| 12 | I03 | 19426 | CG3894               | 19.4097     | 0.073287333 | 264.8438566 |
| 12 | I04 | 19967 | CG2982,CG3620,CG3712 | 14.95090667 | 0.075741    | 197.3951581 |
| 12 | I05 | 19432 | CG2555               | 15.19501    | 0.069077333 | 219.9709987 |
| 12 | I06 | 19990 | CG2861               | 12.47520333 | 0.066867667 | 186.5655549 |
| 12 | I07 | 19433 | CG2765               | 16.14297    | 0.075653    | 213.3817562 |
| 12 | I08 | 24485 | CG14740              | 15.46546333 | 0.066927333 | 231.0784333 |
| 12 | I09 | 19448 | CG3836               | 9.918174333 | 0.063817333 | 155.4150544 |
| 12 | I10 | 24487 | CG16791              | 8.171958    | 0.054416667 | 150.173807  |
| 12 | I11 | 19434 | CG2906               | 9.958486667 | 0.046295    | 215.1093351 |

|    |     |       |               |             |             |             |
|----|-----|-------|---------------|-------------|-------------|-------------|
| 12 | I12 | 24482 | CG12202       | 7.586064667 | 0.045623333 | 166.2759845 |
| 12 | I13 | 19957 | CG7183,CG7988 | 11.55669833 | 0.055844333 | 206.9448706 |
| 12 | I14 | 24483 | CG12360       | 12.50885367 | 0.055026    | 227.3262397 |
| 12 | I15 | 19984 | CG1850        | 9.662824    | 0.053804333 | 179.5919288 |
| 12 | I16 | 24486 | CG32491       | 13.37376267 | 0.053998667 | 247.6683869 |
| 12 | I17 | 19982 | CG8010        | 11.163221   | 0.051135333 | 218.3073869 |
| 12 | I18 | 24478 | CG10764       | 12.87095467 | 0.046458667 | 277.0409827 |
| 12 | I19 | 19974 | CG2137        | 12.829547   | 0.047641    | 269.2963414 |
| 12 | I20 | 24477 | CG12070       | 8.797445667 | 0.033063667 | 266.0759242 |
| 12 | I21 | 19997 | CG1984        | 11.55427767 | 0.043117333 | 267.9729189 |
| 12 | I22 | 24493 | CG12162       | 11.95116633 | 0.044898667 | 266.180874  |
| 12 | I23 | 19983 | CG8034        | 11.97594933 | 0.041489    | 288.653603  |
| 12 | I24 | 24500 | CG10691       | 15.73306133 | 0.049287667 | 319.2088893 |
| 12 | J01 | 22082 | CG17871       | 12.33199033 | 0.073074667 | 168.7587627 |
| 12 | J02 | 16614 | CG13972       | 12.36798533 | 0.065118667 | 189.9299535 |
| 12 | J03 | 22085 | CG6934        | 10.38204067 | 0.053512667 | 194.0109008 |
| 12 | J04 | 16600 | CG13901       | 11.33877133 | 0.060554667 | 187.2485137 |
| 12 | J05 | 22089 | CG18268       | 9.795980333 | 0.065911    | 148.6243621 |
| 12 | J06 | 23914 | CG4502        | 11.20472133 | 0.066909    | 167.4620953 |
| 12 | J07 | 22093 | CG31211       | 12.38981367 | 0.075746333 | 163.5698142 |
| 12 | J08 | 23871 | CG4840        | 11.306661   | 0.060664    | 186.3817256 |
| 12 | J09 | 22102 | CG18367       | 11.24817233 | 0.065864    | 170.7787613 |
| 12 | J10 | 23941 | CG4702        | 11.477152   | 0.051633333 | 222.2818334 |
| 12 | J11 | 16583 | CG13139       | 10.73423767 | 0.049412667 | 217.2365588 |
| 12 | J12 | 23910 | CG3548        | 10.89130233 | 0.049860333 | 218.4362118 |
| 12 | J13 | 16593 | CG13022       | 12.76919133 | 0.052228    | 244.4893799 |
| 12 | J14 | 23883 | CG4857        | 12.414218   | 0.051727333 | 239.9933884 |
| 12 | J15 | 16594 | CG13096       | 8.941672667 | 0.066576333 | 134.3070761 |
| 12 | J16 | 23893 | CG4677        | 11.564199   | 0.043592333 | 265.2805692 |
| 12 | J17 | 16619 | CG13167       | 11.66986867 | 0.049207667 | 237.1554974 |
| 12 | J18 | 23921 | CG3474        | 8.656435    | 0.044525333 | 194.4159505 |
| 12 | J19 | 16603 | CG12952       | 11.18818267 | 0.046969    | 238.2035527 |
| 12 | J20 | 23923 | CG3589        | 11.247629   | 0.046661    | 241.0498918 |
| 12 | J21 | 16597 | CG13252       | 13.38669067 | 0.050018    | 267.6374638 |
| 12 | J22 | 23924 | CG4377        | 12.73095    | 0.045677333 | 278.7148257 |
| 12 | J23 | 16574 | CG13284       | 11.42948567 | 0.044653333 | 255.9604136 |
| 12 | J24 | 16359 | CG10357       | 10.69964133 | 0.038430667 | 278.4141484 |
| 12 | K02 | 19987 | CG2267        | 13.43401    | 0.074135667 | 181.2084602 |
| 12 | K03 | 19438 | CG3906        | 14.75757667 | 0.076819    | 192.1084194 |
| 12 | K04 | 20000 | CG2668        | 15.73334333 | 0.064699    | 243.1775349 |
| 12 | K05 | 19444 | CG31248       | 14.73270333 | 0.071204333 | 206.907398  |
| 12 | K06 | 19992 | CG4066        | 13.63351333 | 0.064219333 | 212.2960894 |
| 12 | K07 | 19445 | CG2808        | 15.44468667 | 0.062734667 | 246.1906229 |
| 12 | K08 | 24497 | CG14813       | 14.16281    | 0.064892    | 218.2520187 |
| 12 | K09 | 19447 | CG3766        | 2.340654667 | 0.085443667 | 27.39412712 |
| 12 | K1  | 19439 | CG3939        | 10.84207533 | 0.066522    | 162.984807  |
| 12 | K10 | 24499 | CG30078       | 11.61045333 | 0.055949667 | 207.5160412 |
| 12 | K11 | 19428 | CG3987        | 15.07608333 | 0.059657333 | 252.711318  |
| 12 | K12 | 24494 | CG12218       | 11.52880133 | 0.060242333 | 191.3737516 |
| 12 | K13 | 19969 | CG7989        | 10.10501233 | 0.065229333 | 154.9151558 |
| 12 | K14 | 24455 | CG10833       | 11.99772667 | 0.050692667 | 236.6757848 |
| 12 | K15 | 19996 | CG1854        | 14.10013667 | 0.055348667 | 254.7511533 |
| 12 | K16 | 24498 | CG15814       | 13.86993333 | 0.051311333 | 270.3093534 |
| 12 | K17 | 19994 | CG8012        | 12.95129    | 0.045374    | 285.4341693 |

|    |     |       |                 |             |             |             |
|----|-----|-------|-----------------|-------------|-------------|-------------|
| 12 | K18 | 24490 | CG10772         | 5.146212667 | 0.055117    | 93.36888195 |
| 12 | K19 | 19989 | CG7970          | 14.62665    | 0.052477333 | 278.7231948 |
| 12 | K20 | 24489 | CG12084         | 18.32553    | 0.04701     | 389.8219528 |
| 12 | K21 | 20009 | CG1988          | 16.08370333 | 0.045594    | 352.7592081 |
| 12 | K22 | 24520 | CG13627         | 12.14506333 | 0.046071    | 263.61623   |
| 12 | K23 | 19995 | CG8038          | 13.45178667 | 0.048646333 | 276.5221086 |
| 12 | K24 | 24479 | CG10849         | 14.93392    | 0.057749    | 258.6004952 |
| 12 | L01 | 22095 | CG18635         | 14.75457667 | 0.083674667 | 176.3326614 |
| 12 | L02 | 16589 | CG13922         | 16.44945333 | 0.069709333 | 235.9720363 |
| 12 | L03 | 22100 | CG18178         | 14.61293333 | 0.084926    | 172.066662  |
| 12 | L04 | 16590 | CG13964         | 13.11604333 | 0.070903667 | 184.9839924 |
| 12 | L05 | 22096 | CG18669         | 13.78425333 | 0.067906    | 202.990212  |
| 12 | L06 | 23929 | CG4695          | 12.64316333 | 0.065931333 | 191.7625914 |
| 12 | L07 | 22127 | CG18449         | 13.95901    | 0.066711667 | 209.2439104 |
| 12 | L08 | 23916 | CG3292          | 13.16702    | 0.072553333 | 181.480566  |
| 12 | L09 | 22073 | CG6917          | 15.44314333 | 0.058180333 | 265.4358002 |
| 12 | L10 | 23920 | CG31317         | 14.78012    | 0.062084667 | 238.0639342 |
| 12 | L11 | 16596 | CG13207         | 17.51478    | 0.059794333 | 292.9170546 |
| 12 | L12 | 23922 | CG3552          | 15.28441333 | 0.058444    | 261.522369  |
| 12 | L13 | 16605 | CG13023         | 14.34199667 | 0.060687667 | 236.3247337 |
| 12 | L14 | 23925 | CG4454          | 9.529730333 | 0.062808    | 151.7279699 |
| 12 | L15 | 16606 | CG13112         | 12.72241    | 0.063003    | 201.9334    |
| 12 | L16 | 23918 | CG4768          | 15.75742333 | 0.048681    | 323.6873387 |
| 12 | L17 | 16599 | CG12909         | 16.34347667 | 0.058873667 | 277.6024935 |
| 12 | L18 | 23933 | CG3493          | 12.28402667 | 0.048656    | 252.466842  |
| 12 | L19 | 16604 | CG12990         | 16.36917333 | 0.053933333 | 303.5075402 |
| 12 | L20 | 23935 | CG3599          | 15.22221333 | 0.052407    | 290.4614524 |
| 12 | L21 | 16609 | CG13263         | 13.74074    | 0.048239667 | 284.8431789 |
| 12 | L22 | 23936 | CG32042         | 14.26105333 | 0.044733667 | 318.7991148 |
| 12 | L23 | 16586 | CG13287         | 14.55927667 | 0.046222333 | 314.9835938 |
| 12 | L24 | 16395 | CG10369         | 13.97087    | 0.043064333 | 324.4185831 |
| 12 | M01 | 19451 | CG3944          | 16.48284333 | 0.067644667 | 243.6680399 |
| 12 | M02 | 19999 | CG2278          | 18.16472333 | 0.072144333 | 251.7830922 |
| 12 | M03 | 19436 | CG3831          | 14.49918033 | 0.065352    | 221.8628402 |
| 12 | M04 | 19980 | CG18508,CG3936  | 12.41632667 | 0.072302333 | 171.7278834 |
| 12 | M05 | 19456 | CG2678          | 14.13356667 | 0.058235333 | 242.697446  |
| 12 | M06 | 20014 | CG2925          | 7.717768    | 0.094159333 | 81.96498134 |
| 12 | M07 | 19457 | CG2837          | 14.65263667 | 0.053660667 | 273.0610255 |
| 12 | M08 | 24509 | CG14899         | 13.06237833 | 0.066714667 | 195.7947028 |
| 12 | M09 | 19459 | CG3767          | 15.77313667 | 0.055159    | 285.9576255 |
| 12 | M10 | 24511 | CG16833         | 13.18134667 | 0.057639    | 228.6879833 |
| 12 | M11 | 19458 | CG3687          | 12.73798    | 0.061811333 | 206.0783891 |
| 12 | M12 | 24460 | CG13326         | 13.46986333 | 0.058306667 | 231.0175509 |
| 12 | M13 | 19981 | CG7991          | 15.96730667 | 0.054714667 | 291.8286383 |
| 12 | M14 | 24507 | CG12389         | 16.62785    | 0.056818333 | 292.6493796 |
| 12 | M15 | 20008 | CG1867          | 14.42953667 | 0.060662333 | 237.866496  |
| 12 | M16 | 24510 | CG15817         | 13.89656667 | 0.058881333 | 236.0097145 |
| 12 | M17 | 19950 | CG30492,CG30494 | 14.28539333 | 0.050840667 | 280.9835958 |
| 12 | M18 | 24502 | CG10795         | 14.34802667 | 0.052867333 | 271.3968298 |
| 12 | M19 | 20001 | CG7971          | 14.07738    | 0.054386    | 258.8419814 |
| 12 | M20 | 24501 | CG12099         | 13.82825333 | 0.045780333 | 302.0566328 |
| 12 | M21 | 20017 | CG7995          | 15.14472333 | 0.046763667 | 323.8566266 |
| 12 | M22 | 24517 | CG12165         | 8.099448    | 0.047637667 | 170.0219294 |
| 12 | M23 | 20010 | CG2189          | 15.06090667 | 0.041235    | 365.2457055 |

|    |     |       |               |             |             |             |
|----|-----|-------|---------------|-------------|-------------|-------------|
| 12 | M24 | 24524 | CG10702       | 14.68692333 | 0.050245667 | 292.3022881 |
| 12 | N01 | 22106 | CG17902       | 14.38934    | 0.076531    | 188.0197567 |
| 12 | N02 | 16601 | CG13927       | 15.60729    | 0.080764    | 193.2456292 |
| 12 | N03 | 22103 | CG31051       | 13.67287    | 0.068409    | 199.8694616 |
| 12 | N04 | 16626 | CG13977       | 11.29892667 | 0.071963    | 157.0102228 |
| 12 | N05 | 22109 | CG7016        | 11.43013    | 0.057362667 | 199.2607852 |
| 12 | N06 | 23938 | CG4510,CG4538 | 13.81576    | 0.067366    | 205.0850577 |
| 12 | N07 | 22119 | CG18648       | 14.89427333 | 0.065895667 | 226.0281152 |
| 12 | N08 | 23928 | CG3307        | 18.16633    | 0.068377    | 265.6789564 |
| 12 | N09 | 22126 | CG30480       | 13.17691167 | 0.054261    | 242.8431409 |
| 12 | N10 | 23932 | CG3382        | 14.04862333 | 0.055750667 | 251.9902303 |
| 12 | N11 | 16608 | CG13213       | 12.63506667 | 0.055272333 | 228.5965854 |
| 12 | N12 | 23934 | CG3557        | 13.38903667 | 0.053813667 | 248.8036496 |
| 12 | N13 | 16559 | CG13133       | 14.90928667 | 0.062394    | 238.9538524 |
| 12 | N14 | 23937 | CG4457        | 11.93325667 | 0.053188333 | 224.3585373 |
| 12 | N15 | 16618 | CG13114       | 15.91954333 | 0.058674667 | 271.3188542 |
| 12 | N16 | 23930 | CG4771        | 13.59787    | 0.051666667 | 263.1845806 |
| 12 | N17 | 16622 | CG31160       | 13.08159667 | 0.053628333 | 243.9306958 |
| 12 | N18 | 23945 | CG3508        | 14.45686333 | 0.050397    | 286.8596014 |
| 12 | N19 | 16616 | CG12991       | 13.90910667 | 0.050114    | 277.5493209 |
| 12 | N20 | 23947 | CG3613        | 13.06834133 | 0.051143333 | 255.523848  |
| 12 | N21 | 16621 | CG13270       | 14.2093     | 0.044832333 | 316.9431288 |
| 12 | N22 | 23948 | CG4385        | 13.102      | 0.037389667 | 350.4176733 |
| 12 | N23 | 16598 | CG13293       | 13.58184667 | 0.041088    | 330.5550688 |
| 12 | N24 | 16383 | CG10363       | 14.24218667 | 0.040135333 | 354.854077  |
| 12 | O01 | 19463 | CG3950        | 14.005919   | 0.072877667 | 192.1839658 |
| 12 | O02 | 19968 | CG3975        | 9.717338333 | 0.075154667 | 129.2978702 |
| 12 | O03 | 19462 | CG3910        | 13.73825667 | 0.056598667 | 242.7311009 |
| 12 | O04 | 20003 | CG3748        | 12.02692667 | 0.054333667 | 221.3531205 |
| 12 | O05 | 19452 | CG3995        | 12.06196667 | 0.062935333 | 191.6565152 |
| 12 | O06 | 24443 | CG10827       | 13.89071667 | 0.068303    | 203.3690565 |
| 12 | O07 | 19469 | CG2841        | 12.96735367 | 0.066278333 | 195.6499661 |
| 12 | O08 | 24521 | CG32529       | 11.74847467 | 0.059486667 | 197.4976129 |
| 12 | O09 | 19471 | CG3770        | 15.60080667 | 0.062320667 | 250.3311903 |
| 12 | O10 | 24523 | CG16857       | 13.01167333 | 0.057852333 | 224.9118157 |
| 12 | O11 | 19470 | CG3700        | 14.35531    | 0.052978    | 270.9673827 |
| 12 | O12 | 24518 | CG12233       | 12.562      | 0.054067333 | 232.3399218 |
| 12 | O13 | 19993 | CG7992        | 15.39797333 | 0.060709333 | 253.634367  |
| 12 | O14 | 24519 | CG12428       | 10.69097233 | 0.051471667 | 207.7059677 |
| 12 | O15 | 20020 | CG1897        | 11.71762    | 0.048608333 | 241.0619578 |
| 12 | O16 | 24522 | CG15824       | 13.81005667 | 0.059537667 | 231.9549529 |
| 12 | O17 | 20018 | CG8014,CG8016 | 9.016315    | 0.041425667 | 217.6504502 |
| 12 | O18 | 24514 | CG10803       | 12.01652667 | 0.051425333 | 233.6693977 |
| 12 | O19 | 19998 | CG2175        | 12.97958    | 0.048185    | 269.3697209 |
| 12 | O20 | 24467 | CG10844       | 12.06967    | 0.043347667 | 278.4387472 |
| 12 | O21 |       | wts           | 67.87037333 | 0.031989667 | 2121.634278 |
| 12 | O22 |       | HFA17794      | 1.486005333 | 0.011385333 | 130.5192646 |
| 12 | O23 |       | hpo           | 37.82574333 | 0.039733    | 951.9981711 |
| 12 | O24 |       | Luc           | 1.807981    | 0.040835    | 44.27527856 |
| 12 | P01 | 22118 | CG17904       | 13.915189   | 0.092292333 | 150.7729678 |
| 12 | P02 | 16613 | CG13929       | 13.10540333 | 0.089073333 | 147.1304917 |
| 12 | P03 | 22115 | CG31304       | 14.31062667 | 0.079182333 | 180.730045  |
| 12 | P04 | 23917 | CG4690        | 11.47346333 | 0.061322333 | 187.1008931 |
| 12 | P05 | 22120 | CG18679       | 11.14915    | 0.067026    | 166.3406738 |

|    |     |       |                |             |             |             |
|----|-----|-------|----------------|-------------|-------------|-------------|
| 12 | P06 | 23950 | CG4520         | 10.18447067 | 0.070485    | 144.4913197 |
| 12 | P07 | 22129 | CG18568        | 11.24457667 | 0.071041    | 158.2829164 |
| 12 | P08 | 23951 | CG4650         | 9.766427667 | 0.064269667 | 151.9601419 |
| 12 | P09 | 22111 | CG18103        | 12.79689    | 0.061658667 | 207.5440598 |
| 12 | P10 | 23944 | CG3386         | 10.99175667 | 0.065490333 | 167.8378488 |
| 12 | P11 | 16620 | CG13214        | 8.452753667 | 0.062366333 | 135.5339205 |
| 12 | P12 | 23946 | CG3548,CG3565  | 12.74450333 | 0.057360667 | 222.1819249 |
| 12 | P13 | 16571 | CG13137        | 12.47581333 | 0.050994333 | 244.6509743 |
| 12 | P14 | 23949 | CG4468         | 11.06183433 | 0.055259    | 200.1815873 |
| 12 | P15 | 16630 | CG18854,CG4026 | 10.902668   | 0.056464333 | 193.0894665 |
| 12 | P16 | 23942 | CG4783         | 13.17087    | 0.054121333 | 243.3581952 |
| 12 | P17 | 16623 | CG12926        | 13.44499333 | 0.051809333 | 259.5090975 |
| 12 | P18 | 23907 | CG4875         | 8.246973    | 0.053340667 | 154.6094849 |
| 12 | P19 | 16628 | CG12995        | 12.93960667 | 0.049835333 | 259.6472382 |
| 12 | P20 | 23931 | CG4880         | 11.96694    | 0.048356333 | 247.4740985 |
| 12 | P21 |       | wts            | 60.93168667 | 0.035277667 | 1727.202857 |
| 12 | P22 |       | HFA17794       | 1.340584667 | 0.010736667 | 124.860416  |
| 12 | P23 |       | hpo            | 43.61036    | 0.041381667 | 1053.857022 |
| 12 | P24 |       | Luc            | 1.983878333 | 0.051001333 | 38.89855821 |
| 13 | A01 |       | DIAP1          | 0.513604333 | 0.009541667 | 53.82752838 |
| 13 | A02 |       | ex/ft          | 45.48616667 | 0.048263    | 942.4645519 |
| 13 | A03 |       | Luc            | 1.992885    | 0.056112667 | 35.51577778 |
| 13 | A04 |       | hpo            | 44.95824333 | 0.045064667 | 997.6384307 |
| 13 | A05 | 16352 | CG10459        | 13.01295    | 0.062754    | 207.3644708 |
| 13 | A06 | 18903 | CG7811         | 16.13907    | 0.063586    | 253.8148335 |
| 13 | A07 | 16356 | CG11357        | 7.202282667 | 0.047819333 | 150.6144516 |
| 13 | A08 | 18906 | CG7915         | 12.59091333 | 0.053555333 | 235.101017  |
| 13 | A09 | 16350 | CG11576        | 14.41184333 | 0.055558    | 259.4017663 |
| 13 | A10 | 18900 | CG11138        | 12.43498867 | 0.058752667 | 211.6497748 |
| 13 | A11 | 16355 | CG10646        | 9.090608    | 0.057948    | 156.8752675 |
| 13 | A12 | 18899 | CG8039         | 13.35692    | 0.049562    | 269.4992131 |
| 13 | A13 | 16349 | CG32277        | 13.93386667 | 0.060509333 | 230.276321  |
| 13 | A14 | 18905 | CG7883         | 13.17139567 | 0.054315    | 242.5001504 |
| 13 | A15 | 16351 | CG10405        | 13.20845333 | 0.047692    | 276.9532277 |
| 13 | A16 | 18904 | CG7834         | 11.95692333 | 0.052448    | 227.9767262 |
| 13 | A17 | 16365 | CG10501        | 14.02293    | 0.059292667 | 236.5036148 |
| 13 | A18 | 18946 | CG8027         | 12.64963333 | 0.047231667 | 267.821024  |
| 13 | A19 | 16370 | CG11436        | 13.29213    | 0.053618667 | 247.9011663 |
| 13 | A20 | 18801 | CG6687         | 12.43135733 | 0.050244333 | 247.4180969 |
| 13 | A21 | 18902 | CG7772         | 13.01794    | 0.042881333 | 303.580579  |
| 13 | A22 | 18805 | CG6700         | 9.591695    | 0.057774333 | 166.0200031 |
| 13 | A23 | 18897 | CG7715         | 11.63132833 | 0.056350667 | 206.4097733 |
| 13 | A24 | 18807 | CG6764         | 7.809348    | 0.064594    | 120.8989689 |
| 13 | B01 |       | DIAP1          | 0.492511333 | 0.009639667 | 51.09215395 |
| 13 | B02 |       | ex/ft          | 44.61946667 | 0.068042    | 655.763597  |
| 13 | B03 |       | Luc            | 2.062539    | 0.066622333 | 30.95867252 |
| 13 | B04 |       | hpo            | 48.32022    | 0.060768667 | 795.1502419 |
| 13 | B05 | 18808 | CG6790         | 12.42179333 | 0.063014    | 197.1275166 |
| 13 | B06 | 26446 | CG31108        | 14.29584333 | 0.068472    | 208.7837851 |
| 13 | B07 | 18811 | CG7506         | 11.66199567 | 0.062947333 | 185.2659207 |
| 13 | B08 | 21269 | CG8358         | 11.969196   | 0.062902333 | 190.2822259 |
| 13 | B09 | 18804 | CG7671         | 10.531372   | 0.057239    | 183.9894478 |
| 13 | B10 | 21273 | CG8417         | 12.71235    | 0.066288333 | 191.773565  |
| 13 | B11 | 18809 | CG6842         | 1.118684333 | 0.125155    | 8.938391062 |

|    |     |       |                 |             |             |             |
|----|-----|-------|-----------------|-------------|-------------|-------------|
| 13 | B12 | 21278 | CG8632          | 13.26573333 | 0.05606     | 236.6345582 |
| 13 | B13 | 18802 | CG7593          | 16.67055667 | 0.062809667 | 265.4138694 |
| 13 | B14 | 21275 | CG8493          | 12.65182    | 0.052378    | 241.54836   |
| 13 | B15 | 18836 | CG7563          | 12.16885667 | 0.056851667 | 214.045733  |
| 13 | B16 | 21276 | CG32376         | 12.65181    | 0.060293667 | 209.8364671 |
| 13 | B17 | 26452 | CG8732          | 24.99993    | 0.057948667 | 431.415103  |
| 13 | B18 | 21277 | CG8561          | 12.423504   | 0.055818667 | 222.5689853 |
| 13 | B19 | 26466 | CG8912          | 12.97113667 | 0.061104333 | 212.2785073 |
| 13 | B20 | 21307 | CG15098         | 9.438763667 | 0.047043    | 200.6411935 |
| 13 | B21 | 26459 | CG15930         | 12.55736333 | 0.048466    | 259.0963425 |
| 13 | B22 | 23670 | CG9615          | 10.80650933 | 0.053063667 | 203.6517642 |
| 13 | B23 | 26460 | CG33187,CG33188 | 11.79130967 | 0.043942333 | 268.3359934 |
| 13 | B24 | 23669 | CG9582          | 14.45947667 | 0.042991    | 336.3372954 |
| 13 | C01 | 16369 | CG11391         | 14.39357    | 0.068901    | 208.902193  |
| 13 | C02 | 18920 | CG7985          | 13.97696    | 0.066368    | 210.5978785 |
| 13 | C03 | 16360 | CG11482         | 12.86840367 | 0.047012333 | 273.7239944 |
| 13 | C04 | 18907 | CG7954          | 10.06204967 | 0.056397    | 178.4146261 |
| 13 | C05 | 16364 | CG10463         | 9.751196    | 0.058046    | 167.9908349 |
| 13 | C06 | 18915 | CG7813          | 13.58414333 | 0.055327333 | 245.5231893 |
| 13 | C07 | 16368 | CG11360         | 11.63763633 | 0.061441    | 189.411571  |
| 13 | C08 | 18918 | CG7922          | 10.92335667 | 0.049848667 | 219.1303679 |
| 13 | C09 | 16378 | CG10578         | 8.679019333 | 0.063835333 | 135.9594895 |
| 13 | C10 | 18912 | CG1856          | 11.018019   | 0.056812333 | 193.937097  |
| 13 | C11 | 16367 | CG10651         | 15.61286333 | 0.050619    | 308.4387944 |
| 13 | C12 | 18974 | CG7802          | 12.95825    | 0.053362667 | 242.833629  |
| 13 | C13 | 16361 | CG33159         | 14.00263333 | 0.054001    | 259.3032228 |
| 13 | C14 | 18917 | CG7888          | 13.40912    | 0.056893333 | 235.6887743 |
| 13 | C15 | 16363 | CG31284         | 14.34792667 | 0.05459     | 262.8306772 |
| 13 | C16 | 18916 | CG7851          | 13.58421667 | 0.042411    | 320.299372  |
| 13 | C17 | 16377 | CG10505         | 12.41930067 | 0.049273667 | 252.0474222 |
| 13 | C18 | 18958 | CG8029          | 6.979070667 | 0.031026667 | 224.9378169 |
| 13 | C19 | 16438 | CG10626         | 14.21406667 | 0.068005333 | 209.0139989 |
| 13 | C20 | 18813 | CG6689          | 11.96664    | 0.039462    | 303.2446404 |
| 13 | C21 | 18914 | CG32438         | 17.00205333 | 0.051739667 | 328.6077091 |
| 13 | C22 | 18817 | CG6707          | 13.90319    | 0.040992667 | 339.1628584 |
| 13 | C23 | 18909 | CG7720          | 16.21555333 | 0.046668333 | 347.4637334 |
| 13 | C24 | 18819 | CG6768          | 10.26793067 | 0.040169333 | 255.6161583 |
| 13 | D01 | 18810 | CG33090         | 16.72861667 | 0.069506333 | 240.6775881 |
| 13 | D02 | 26456 | CG9054          | 10.51718167 | 0.059290667 | 177.3834274 |
| 13 | D03 | 18803 | CG7635          | 11.63537    | 0.049602    | 234.5746139 |
| 13 | D04 | 26445 | CG9153          | 11.27421933 | 0.059261333 | 190.2457926 |
| 13 | D05 | 18820 | CG6791          | 10.16120867 | 0.052620667 | 193.1030014 |
| 13 | D06 | 26458 | CG10080         | 5.621654    | 0.044332    | 126.8080393 |
| 13 | D07 | 18823 | CG7509          | 14.24226067 | 0.054720333 | 260.273646  |
| 13 | D08 | 21281 | CG8365          | 9.808353    | 0.062485667 | 156.9696464 |
| 13 | D09 | 18816 | CG7675          | 14.66221333 | 0.059222333 | 247.5791227 |
| 13 | D10 | 21285 | CG8419          | 12.28194    | 0.065380667 | 187.8527801 |
| 13 | D11 | 18821 | CG6844          | 14.53519667 | 0.062538    | 232.4218342 |
| 13 | D12 | 21290 | CG8642          | 14.59276667 | 0.062075    | 235.0828299 |
| 13 | D13 | 18814 | CG7598          | 12.70565933 | 0.050733333 | 250.4400657 |
| 13 | D14 | 21346 | CG8474          | 12.107662   | 0.048763    | 248.2960851 |
| 13 | D15 | 18848 | CG7578          | 8.128366    | 0.059670667 | 136.2204657 |
| 13 | D16 | 21288 | CG8539          | 13.76480667 | 0.049178667 | 279.8938564 |
| 13 | D17 | 26464 | CG8735          | 15.78241    | 0.051566667 | 306.058371  |

|    |     |       |                 |             |             |             |
|----|-----|-------|-----------------|-------------|-------------|-------------|
| 13 | D18 | 21289 | CG8563          | 11.8711     | 0.049971    | 237.5597847 |
| 13 | D19 | 26478 | CG8913          | 12.30825333 | 0.042713667 | 288.1572643 |
| 13 | D20 | 21319 | CG15102         | 13.18233333 | 0.045956333 | 286.8447584 |
| 13 | D21 | 26513 | CG33119         | 13.34271233 | 0.048688333 | 274.0433163 |
| 13 | D22 | 23682 | CG9619          | 12.92988533 | 0.046871    | 275.8610939 |
| 13 | D23 | 26472 | CG16753,CG32486 | 14.5357     | 0.038053333 | 381.9823055 |
| 13 | D24 | 23681 | CG9593          | 12.57911333 | 0.047460333 | 265.0447742 |
| 13 | E01 | 16381 | CG11398         | 20.70231333 | 0.063894667 | 324.0069072 |
| 13 | E02 | 18932 | CG7986          | 19.45485667 | 0.066376667 | 293.0978255 |
| 13 | E03 | 16372 | CG11501         | 21.32956    | 0.05478     | 389.3676524 |
| 13 | E04 | 18919 | CG7956          | 16.09973667 | 0.047468    | 339.1703182 |
| 13 | E05 | 16376 | CG10467         | 14.77734    | 0.054055    | 273.3760059 |
| 13 | E06 | 18927 | CG7814          | 20.32486    | 0.062958667 | 322.8286283 |
| 13 | E07 | 16380 | CG11367         | 18.82723333 | 0.061675    | 305.2652344 |
| 13 | E08 | 18930 | CG7924          | 21.25597333 | 0.055258    | 384.6678007 |
| 13 | E09 | 16374 | CG11581         | 15.76884333 | 0.051563333 | 305.8150495 |
| 13 | E10 | 18924 | CG1859          | 17.56449667 | 0.06023     | 291.6237202 |
| 13 | E11 | 16390 | CG10589         | 16.07424667 | 0.054134667 | 296.9307406 |
| 13 | E12 | 18923 | CG8051          | 18.54848333 | 0.042441667 | 437.0347536 |
| 13 | E13 | 16373 | CG11534         | 16.21499    | 0.051058333 | 317.5777379 |
| 13 | E14 | 18986 | CG7808          | 2.178976667 | 0.041800333 | 52.12821269 |
| 13 | E15 | 16418 | CG11453         | 17.48169    | 0.048487667 | 360.5388999 |
| 13 | E16 | 18928 | CG7852          | 19.24075    | 0.04914     | 391.549654  |
| 13 | E17 | 16389 | CG10506         | 14.15019667 | 0.047437667 | 298.2903178 |
| 13 | E18 | 18970 | CG8031          | 16.17427333 | 0.037843333 | 427.4008632 |
| 13 | E19 | 16394 | CG11448         | 19.17137    | 0.046086667 | 415.9851729 |
| 13 | E20 | 18825 | CG6692          | 13.48785667 | 0.034886667 | 386.6192433 |
| 13 | E21 | 18926 | CG7785          | 22.14473333 | 0.044289    | 500.0052684 |
| 13 | E22 | 18829 | CG6723          | 18.18146    | 0.039939333 | 455.2269275 |
| 13 | E23 | 18921 | CG7722          | 22.64225667 | 0.050419333 | 449.0788586 |
| 13 | E24 | 18831 | CG6769          | 18.26084667 | 0.039777667 | 459.0728466 |
| 13 | F01 | 18884 | CG7586          | 20.03147667 | 0.079558    | 251.7845681 |
| 13 | F02 | 26468 | CG9075          | 5.151296667 | 0.062909667 | 81.88402418 |
| 13 | F03 | 18894 | CG7494          | 15.15437667 | 0.060502    | 250.4772845 |
| 13 | F04 | 26457 | CG18214         | 10.41392567 | 0.052950333 | 196.6734676 |
| 13 | F05 | 18832 | CG6798          | 17.14656333 | 0.067952    | 252.3334609 |
| 13 | F06 | 26470 | CG10082         | 13.91470333 | 0.053492667 | 260.1235683 |
| 13 | F07 | 18835 | CG33167         | 15.38956333 | 0.068325333 | 225.2394915 |
| 13 | F08 | 21293 | CG8372          | 17.40519667 | 0.05615     | 309.9767884 |
| 13 | F09 | 18828 | CG7686          | 6.480014333 | 0.054352667 | 119.2216451 |
| 13 | F10 | 21297 | CG8424          | 16.89336    | 0.050292    | 335.9055118 |
| 13 | F11 | 18833 | CG6860          | 16.00601667 | 0.048815667 | 327.8868806 |
| 13 | F12 | 21334 | CG33173         | 16.87541667 | 0.048711    | 346.4395448 |
| 13 | F13 | 18826 | CG7600          | 19.1572     | 0.049644333 | 385.8889568 |
| 13 | F14 | 21299 | CG8506          | 15.76244333 | 0.044477667 | 354.3900684 |
| 13 | F15 | 18860 | CG7580          | 10.54182667 | 0.045943333 | 229.4528042 |
| 13 | F16 | 21300 | CG8540          | 18.31924333 | 0.04007     | 457.1810166 |
| 13 | F17 | 26476 | CG8740          | 17.50635667 | 0.042999667 | 407.1277297 |
| 13 | F18 | 21315 | CG8681          | 16.03253667 | 0.049772333 | 322.1174414 |
| 13 | F19 | 26490 | CG8918          | 16.63123667 | 0.043670333 | 380.8360367 |
| 13 | F20 | 23692 | CG9559          | 13.09460333 | 0.039506    | 331.458597  |
| 13 | F21 | 26483 | CG16711         | 16.2839     | 0.042545    | 382.7453285 |
| 13 | F22 | 23694 | CG9620          | 17.01058667 | 0.042040333 | 404.6253994 |
| 13 | F23 | 26484 | CG16755         | 16.22202667 | 0.037127333 | 436.9294859 |



|    |     |       |                |             |             |             |
|----|-----|-------|----------------|-------------|-------------|-------------|
| 13 | F24 | 23693 | CG9594         | 11.49828    | 0.035017667 | 328.3565438 |
| 13 | G01 | 16393 | CG11403        | 14.57675    | 0.068327667 | 213.335984  |
| 13 | G02 | 18944 | CG7993         | 11.97319    | 0.065753    | 182.0934406 |
| 13 | G03 | 16384 | CG11504        | 17.09687667 | 0.063466333 | 269.3849758 |
| 13 | G04 | 18931 | CG7961         | 0.922057667 | 0.059843    | 15.40794523 |
| 13 | G05 | 16388 | CG10469        | 14.70753333 | 0.062804333 | 234.1802317 |
| 13 | G06 | 18939 | CG16889,CG7820 | 18.54207    | 0.054150667 | 342.416283  |
| 13 | G07 | 16392 | CG11374        | 15.44835333 | 0.058098333 | 265.9001119 |
| 13 | G08 | 18942 | CG7935         | 8.719724    | 0.080404333 | 108.4484335 |
| 13 | G09 | 16386 | CG11584        | 14.67261    | 0.052717    | 278.3278639 |
| 13 | G10 | 18936 | CG1864         | 17.41945333 | 0.062215333 | 279.9864985 |
| 13 | G11 | 16391 | CG10657        | 16.22595    | 0.051445667 | 315.3997421 |
| 13 | G12 | 18935 | CG8058         | 14.37829333 | 0.049867667 | 288.3289774 |
| 13 | G13 | 16385 | CG31690        | 14.56792667 | 0.043287    | 336.542765  |
| 13 | G14 | 18941 | CG7896         | 15.75881333 | 0.043434333 | 362.8192751 |
| 13 | G15 | 16430 | CG11454        | 9.296472667 | 0.045231333 | 205.5316963 |
| 13 | G16 | 18991 | CG30097        | 14.97999    | 0.045819667 | 326.9336311 |
| 13 | G17 | 16401 | CG32944        | 15.24375333 | 0.042147333 | 361.6777653 |
| 13 | G18 | 18982 | CG8032         | 17.01730333 | 0.041537667 | 409.6836606 |
| 13 | G19 | 16406 | CG11450        | 16.34301667 | 0.041424667 | 394.5237942 |
| 13 | G20 | 18837 | CG6695         | 13.539046   | 0.043493    | 311.2925298 |
| 13 | G21 | 18938 | CG7787         | 19.18195667 | 0.045040667 | 425.8808336 |
| 13 | G22 | 18841 | CG6724         | 11.350062   | 0.044426333 | 255.4805033 |
| 13 | G23 | 18933 | CG7724         | 16.41014    | 0.041522    | 395.2155484 |
| 13 | G24 | 18843 | CG6773         | 7.468886    | 0.049251667 | 151.6473757 |
| 13 | H01 | 18834 | CG7479         | 19.77613667 | 0.070732333 | 279.5911818 |
| 13 | H02 | 26480 | CG9088         | 7.414768667 | 0.059692333 | 124.216432  |
| 13 | H03 | 18827 | CG7638         | 17.25223333 | 0.0554      | 311.412154  |
| 13 | H04 | 26469 | CG9261         | 11.51396667 | 0.062936333 | 182.9462579 |
| 13 | H05 | 18844 | CG6812         | 14.63382333 | 0.055652333 | 262.9507598 |
| 13 | H06 | 26482 | CG10084        | 3.718234    | 0.067976667 | 54.69868092 |
| 13 | H07 | 18847 | CG7516         | 9.231243    | 0.051839667 | 178.0729621 |
| 13 | H08 | 21305 | CG8383         | 10.63876033 | 0.058525333 | 181.7804313 |
| 13 | H09 | 18840 | CG7694         | 15.54790667 | 0.056047667 | 277.4050659 |
| 13 | H10 | 21309 | CG8425         | 15.08045667 | 0.048998333 | 307.7748903 |
| 13 | H11 | 18845 | CG6863         | 14.41987333 | 0.043442667 | 331.9288257 |
| 13 | H12 | 21314 | CG8647         | 14.53912    | 0.049757667 | 292.1985892 |
| 13 | H13 | 18838 | CG7601         | 17.68119333 | 0.048163    | 367.1115448 |
| 13 | H14 | 21303 | CG8676         | 15.72073667 | 0.050717333 | 309.9677296 |
| 13 | H15 | 18872 | CG7582         | 16.07620333 | 0.042901    | 374.7279395 |
| 13 | H16 | 21312 | CG8545         | 10.64881567 | 0.052620333 | 202.3707375 |
| 13 | H17 | 26521 | CG16800        | 13.42871733 | 0.039558333 | 339.466206  |
| 13 | H18 | 21313 | CG8584         | 14.02100333 | 0.040697333 | 344.5189693 |
| 13 | H19 | 26502 | CG8954         | 4.809756333 | 0.035205    | 136.6213985 |
| 13 | H20 | 23724 | CG9533         | 12.207145   | 0.038065333 | 320.6892973 |
| 13 | H21 | 26495 | CG16720        | 14.87229667 | 0.035918333 | 414.0586516 |
| 13 | H22 | 23676 | CG9517         | 18.33231    | 0.042171333 | 434.7102297 |
| 13 | H23 | 26486 | CG16826        | 16.10656333 | 0.044612667 | 361.031172  |
| 13 | H24 | 23705 | CG9596         | 18.52492    | 0.039092    | 473.8800778 |
| 13 | I01 | 16405 | CG32812        | 18.88091333 | 0.072238667 | 261.3685192 |
| 13 | I02 | 18956 | CG7998         | 15.96929667 | 0.068760333 | 232.2457715 |
| 13 | I03 | 16396 | CG11508,CG2160 | 16.97100667 | 0.070621333 | 240.3099158 |
| 13 | I04 | 18943 | CG7962         | 16.31099333 | 0.067905333 | 240.2019478 |
| 13 | I05 | 16400 | CG10473        | 15.87253333 | 0.074749    | 212.3444238 |

|    |     |       |         |             |             |             |
|----|-----|-------|---------|-------------|-------------|-------------|
| 13 | I06 | 18951 | CG7823  | 15.52033333 | 0.058936333 | 263.340667  |
| 13 | I07 | 16404 | CG11382 | 15.96328333 | 0.063139333 | 252.8262889 |
| 13 | I08 | 18954 | CG7938  | 15.47536667 | 0.0537      | 288.1818746 |
| 13 | I09 | 16398 | CG11585 | 14.03731333 | 0.055137667 | 254.5866407 |
| 13 | I10 | 18948 | CG1871  | 13.6604     | 0.061035    | 223.8125666 |
| 13 | I11 | 16403 | CG10662 | 14.09857333 | 0.051129    | 275.7451414 |
| 13 | I12 | 18947 | CG8060  | 19.10892    | 0.060572333 | 315.4727406 |
| 13 | I13 | 16397 | CG11546 | 14.01734333 | 0.061277333 | 228.7525023 |
| 13 | I14 | 18953 | CG7899  | 12.62005333 | 0.052296    | 241.3196675 |
| 13 | I15 | 16399 | CG10431 | 13.49119667 | 0.051927667 | 259.8074886 |
| 13 | I16 | 18952 | CG7864  | 14.06479333 | 0.05372     | 261.8167039 |
| 13 | I17 | 16426 | CG10624 | 18.21758    | 0.053185    | 342.5322929 |
| 13 | I18 | 18806 | CG6735  | 16.87819    | 0.047577667 | 354.750268  |
| 13 | I19 | 18901 | CG7741  | 15.65365333 | 0.046245667 | 338.4890837 |
| 13 | I20 | 18849 | CG6696  | 14.49609    | 0.052551333 | 275.8462836 |
| 13 | I21 | 18950 | CG7789  | 17.96656    | 0.051586333 | 348.2813924 |
| 13 | I22 | 18853 | CG6725  | 18.23764667 | 0.047019667 | 387.8727341 |
| 13 | I23 | 18945 | CG7725  | 19.45479    | 0.050669333 | 383.9559102 |
| 13 | I24 | 18855 | CG6776  | 16.52257    | 0.043064667 | 383.6688236 |
| 13 | J01 | 18846 | CG7483  | 6.965509333 | 0.179933    | 38.71168342 |
| 13 | J02 | 26492 | CG33180 | 13.12611667 | 0.063443667 | 206.8940425 |
| 13 | J03 | 18867 | CG6779  | 1.628434333 | 0.043934333 | 37.0651882  |
| 13 | J04 | 26529 | CG10026 | 16.50769333 | 0.064086    | 257.5865764 |
| 13 | J05 | 18856 | CG6814  | 21.35893667 | 0.068963333 | 309.7143893 |
| 13 | J06 | 26494 | CG10106 | 14.72215    | 0.061784333 | 238.282898  |
| 13 | J07 | 18859 | CG7526  | 15.34740333 | 0.052013    | 295.0686046 |
| 13 | J08 | 21317 | CG8394  | 14.55760333 | 0.056146667 | 259.2781406 |
| 13 | J09 | 18852 | CG7697  | 28.8816     | 0.065182333 | 443.0893852 |
| 13 | J10 | 21321 | CG8434  | 15.80674667 | 0.054522667 | 289.9114741 |
| 13 | J11 | 18857 | CG7449  | 14.34390333 | 0.046937667 | 305.5947249 |
| 13 | J12 | 21326 | CG8648  | 13.300978   | 0.061075    | 217.7810561 |
| 13 | J13 | 18850 | CG7619  | 5.573028667 | 0.053471667 | 104.2239566 |
| 13 | J14 | 21323 | CG8515  | 13.43482667 | 0.048738    | 275.6540413 |
| 13 | J15 | 26499 | CG8709  | 14.84209    | 0.044356    | 334.6129047 |
| 13 | J16 | 21358 | CG8476  | 17.20740333 | 0.048792    | 352.6685386 |
| 13 | J17 | 26500 | CG8776  | 16.42923333 | 0.048495    | 338.782005  |
| 13 | J18 | 21351 | CG8704  | 13.07414    | 0.048457    | 269.8091091 |
| 13 | J19 | 26514 | CG8980  | 12.15347333 | 0.047311333 | 256.8829174 |
| 13 | J20 | 23716 | CG9564  | 15.25665333 | 0.05158     | 295.786222  |
| 13 | J21 | 26507 | CG16727 | 16.72005    | 0.041881333 | 399.2243959 |
| 13 | J22 | 23736 | CG9542  | 16.57017667 | 0.046351    | 357.4934018 |
| 13 | J23 | 26525 | CG8864  | 14.92287667 | 0.043329333 | 344.4058682 |
| 13 | J24 | 23717 | CG9597  | 16.29397667 | 0.038162333 | 426.9648956 |
| 13 | K02 | 18968 | CG7999  | 11.94567333 | 0.07329     | 162.9918588 |
| 13 | K03 | 16408 | CG11513 | 6.648583333 | 0.060655667 | 109.6119077 |
| 13 | K04 | 18962 | CG31037 | 10.784959   | 0.061994333 | 173.9668518 |
| 13 | K05 | 16412 | CG10474 | 10.836422   | 0.069445    | 156.0432285 |
| 13 | K06 | 18963 | CG7824  | 11.57666267 | 0.065512    | 176.710567  |
| 13 | K07 | 16416 | CG11384 | 12.54454667 | 0.064357667 | 194.9192274 |
| 13 | K08 | 18966 | CG7942  | 13.57812    | 0.057785667 | 234.9738401 |
| 13 | K09 | 16410 | CG11588 | 11.30123667 | 0.066878667 | 168.9811898 |
| 13 | K1  | 16417 | CG11412 | 13.63601333 | 0.070454333 | 193.5439978 |
| 13 | K10 | 18960 | CG1885  | 13.12323333 | 0.059048333 | 222.245618  |
| 13 | K11 | 16415 | CG10663 | 16.41484    | 0.055373667 | 296.4376569 |

|    |     |       |                 |             |             |             |
|----|-----|-------|-----------------|-------------|-------------|-------------|
| 13 | K12 | 18959 | CG1845          | 6.591698667 | 0.057498333 | 114.6415606 |
| 13 | K13 | 16402 | CG10594         | 12.28285667 | 0.058353    | 210.4922912 |
| 13 | K14 | 18965 | CG7908          | 13.17827333 | 0.061043667 | 215.8827288 |
| 13 | K15 | 16411 | CG32105         | 13.31104    | 0.056695667 | 234.7805535 |
| 13 | K16 | 18964 | CG7870          | 11.27999667 | 0.053255667 | 211.8083835 |
| 13 | K17 | 16425 | CG10543         | 7.974801    | 0.049365    | 161.5476755 |
| 13 | K18 | 18854 | CG6750          | 10.97902967 | 0.052846    | 207.7551691 |
| 13 | K19 | 18949 | CG7757          | 8.296401    | 0.063749    | 130.141665  |
| 13 | K20 | 18861 | CG6697          | 12.82411667 | 0.058475333 | 219.3081413 |
| 13 | K21 | 18981 | CG7739          | 12.91583333 | 0.055115    | 234.3433427 |
| 13 | K22 | 18865 | CG6726          | 14.98229    | 0.054085667 | 277.0103601 |
| 13 | K23 | 18957 | CG7726          | 1.618018    | 0.044739    | 36.16571671 |
| 13 | K24 | 18878 | CG6758          | 11.00475333 | 0.043328333 | 253.9851521 |
| 13 | L01 | 18858 | CG7487          | 16.56157333 | 0.100296    | 165.1269575 |
| 13 | L02 | 26538 | CG9005          | 18.00639    | 0.070453667 | 255.5777556 |
| 13 | L03 | 18879 | CG31305         | 17.29678333 | 0.072478333 | 238.6476418 |
| 13 | L04 | 26493 | CG9297          | 15.68627333 | 0.073415333 | 213.6648112 |
| 13 | L05 | 18868 | CG6818          | 15.67506667 | 0.068395    | 229.1843946 |
| 13 | L06 | 21286 | CG8455          | 15.98121667 | 0.068380333 | 233.710716  |
| 13 | L07 | 18871 | CG7528          | 19.86218333 | 0.149919    | 132.486098  |
| 13 | L08 | 21329 | CG8395          | 6.778103    | 0.067979667 | 99.70779988 |
| 13 | L09 | 18864 | CG7697,CG7698   | 21.72821    | 0.055042    | 394.7569129 |
| 13 | L10 | 21333 | CG8442          | 11.484752   | 0.057143333 | 200.9814852 |
| 13 | L11 | 18869 | CG7452          | 15.33133667 | 0.05912     | 259.3257217 |
| 13 | L12 | 21338 | CG8652          | 13.509984   | 0.055240667 | 244.5659116 |
| 13 | L13 | 18862 | CG7622          | 1.370626667 | 0.044091667 | 31.08584389 |
| 13 | L14 | 21335 | CG8522          | 10.386199   | 0.051757667 | 200.6697687 |
| 13 | L15 | 26511 | CG8715          | 17.5369     | 0.058784    | 298.3277763 |
| 13 | L16 | 21336 | CG8550          | 13.02463667 | 0.057887    | 225.0010653 |
| 13 | L17 | 26491 | CG15923         | 16.40665667 | 0.058890667 | 278.5951934 |
| 13 | L18 | 21337 | CG8591          | 13.25349667 | 0.059264667 | 223.6323498 |
| 13 | L19 | 26465 | CG8828          | 12.40405    | 0.062896    | 197.2152442 |
| 13 | L20 | 23728 | CG9565          | 14.29662    | 0.051420333 | 278.0343703 |
| 13 | L21 | 26519 | CG16734         | 14.31165667 | 0.053477333 | 267.6209858 |
| 13 | L22 | 23700 | CG9523          | 16.82402667 | 0.051092667 | 329.2845679 |
| 13 | L23 | 26510 | CG16850         | 17.67444333 | 0.045886    | 385.1816095 |
| 13 | L24 | 23729 | CG9606          | 9.305253    | 0.042904    | 216.8854419 |
| 13 | M01 | 16429 | CG11415         | 14.72378    | 0.071993333 | 204.5158811 |
| 13 | M02 | 18980 | CG32068         | 12.50084467 | 0.063592667 | 196.5768275 |
| 13 | M03 | 16407 | CG10373         | 11.94476433 | 0.069609667 | 171.5963444 |
| 13 | M04 | 18967 | CG7966          | 14.70992    | 0.065219333 | 225.5453904 |
| 13 | M05 | 16424 | CG10481         | 13.46177333 | 0.055861333 | 240.9855356 |
| 13 | M06 | 18975 | CG7826          | 9.746658333 | 0.057097333 | 170.7025138 |
| 13 | M07 | 16428 | CG11387         | 8.88482     | 0.059778333 | 148.6294365 |
| 13 | M08 | 18978 | CG7946          | 14.33346667 | 0.055144    | 259.9279462 |
| 13 | M09 | 16422 | CG11589         | 13.68208    | 0.058632667 | 233.3525111 |
| 13 | M10 | 18972 | CG1887          | 17.62299667 | 0.054882333 | 321.1050915 |
| 13 | M11 | 16427 | CG10667         | 12.55260267 | 0.045389333 | 276.5540215 |
| 13 | M12 | 18971 | CG1849          | 13.9399     | 0.060368667 | 230.9128356 |
| 13 | M13 | 16421 | CG11570         | 13.26157333 | 0.052243333 | 253.8424041 |
| 13 | M14 | 18977 | CG7910          | 14.76821667 | 0.050123333 | 294.6375607 |
| 13 | M15 | 16423 | CG10444         | 14.68677333 | 0.047336333 | 310.264279  |
| 13 | M16 | 18976 | CG7878          | 16.6296     | 0.058424333 | 284.6348268 |
| 13 | M17 | 16437 | CG10546,CG32912 | 16.22423    | 0.053364333 | 304.0275965 |

|    |     |       |                 |             |             |             |
|----|-----|-------|-----------------|-------------|-------------|-------------|
| 13 | M18 | 18866 | CG6756          | 14.77778667 | 0.044170333 | 334.5636211 |
| 13 | M19 | 18961 | CG7762          | 0.812426    | 0.018935333 | 42.90529169 |
| 13 | M20 | 18873 | CG6698          | 13.91711667 | 0.047008    | 296.0584723 |
| 13 | M21 | 18985 | CG7768          | 16.97480333 | 0.047425667 | 357.924401  |
| 13 | M22 | 18877 | CG6729          | 17.73896333 | 0.045991333 | 385.7023062 |
| 13 | M23 | 18969 | CG7728          | 8.361955667 | 0.047865333 | 174.6975334 |
| 13 | M24 | 18890 | CG6760          | 17.08005333 | 0.052993    | 322.3077262 |
| 13 | N01 | 18891 | CG6784          | 16.35513    | 0.079603667 | 205.4569932 |
| 13 | N02 | 26516 | CG9140          | 12.07289467 | 0.059641    | 202.4260939 |
| 13 | N03 | 18863 | CG7656          | 14.04017    | 0.067712    | 207.3512819 |
| 13 | N04 | 26505 | CG9302          | 13.63210333 | 0.080337667 | 169.6850792 |
| 13 | N05 | 18880 | CG6839          | 11.73827233 | 0.058829667 | 199.5298121 |
| 13 | N06 | 21298 | CG8457          | 13.76196667 | 0.064499    | 213.3671323 |
| 13 | N07 | 18883 | CG7536          | 14.46756333 | 0.062892333 | 230.0369944 |
| 13 | N08 | 21341 | CG8404          | 15.59204667 | 0.059741333 | 260.9926126 |
| 13 | N09 | 18876 | CG7702          | 14.93750667 | 0.057568    | 259.4758662 |
| 13 | N10 | 21345 | CG33154         | 12.29984133 | 0.058667667 | 209.6528127 |
| 13 | N11 | 18881 | CG7456          | 9.839853    | 0.052751    | 186.5339614 |
| 13 | N12 | 21350 | CG8666          | 14.22739667 | 0.055428333 | 256.6809394 |
| 13 | N13 | 18887 | CG7670          | 17.14515    | 0.05804     | 295.4023088 |
| 13 | N14 | 21347 | CG8523          | 12.86802333 | 0.056169667 | 229.0920366 |
| 13 | N15 | 26523 | CG11198         | 18.99717    | 0.051258667 | 370.6138149 |
| 13 | N16 | 21348 | CG8553          | 23.16274667 | 0.051265667 | 451.8179158 |
| 13 | N17 | 26524 | CG8793          | 12.51841867 | 0.055728333 | 224.6329276 |
| 13 | N18 | 21349 | CG8602          | 14.14365667 | 0.048374    | 292.3813757 |
| 13 | N19 | 26477 | CG8831          | 5.943117667 | 0.039703667 | 149.6868719 |
| 13 | N20 | 23740 | CG9571          | 9.357282667 | 0.049222667 | 190.1010916 |
| 13 | N21 | 26503 | CG15924         | 14.91355667 | 0.045072667 | 330.8780636 |
| 13 | N22 | 23753 | CG9613          | 16.97379333 | 0.04348     | 390.3816314 |
| 13 | N23 | 26522 | CG31847         | 14.57197667 | 0.046243667 | 315.1129164 |
| 13 | N24 | 23741 | CG9610          | 13.653302   | 0.044198667 | 308.9075538 |
| 13 | O01 | 16441 | CG11417,CG12773 | 10.318174   | 0.075228667 | 137.1574754 |
| 13 | O02 | 18992 | CG8001          | 10.59488267 | 0.060014333 | 176.5392045 |
| 13 | O03 | 16419 | CG10390         | 14.10261667 | 0.064903333 | 217.2864773 |
| 13 | O04 | 18979 | CG7967          | 14.785274   | 0.071480667 | 206.8429785 |
| 13 | O05 | 16436 | CG10486         | 9.908987    | 0.052590667 | 188.417216  |
| 13 | O06 | 18987 | CG7829          | 12.84650333 | 0.062491    | 205.5736559 |
| 13 | O07 | 16440 | CG11388         | 11.56442367 | 0.058799    | 196.6772167 |
| 13 | O08 | 18990 | CG7948          | 13.04492    | 0.062727333 | 207.9622918 |
| 13 | O09 | 16434 | CG11592         | 16.88290667 | 0.06412     | 263.3017259 |
| 13 | O10 | 18984 | CG1894          | 10.45395633 | 0.050926333 | 205.2760458 |
| 13 | O11 | 16439 | CG11356         | 11.52961767 | 0.045914    | 251.1133351 |
| 13 | O12 | 18983 | CG1851          | 11.53892833 | 0.048416    | 238.3288238 |
| 13 | O13 | 16433 | CG11573         | 12.01474967 | 0.050438667 | 238.2051402 |
| 13 | O14 | 18989 | CG7913          | 14.30747    | 0.055885667 | 256.0132294 |
| 13 | O15 | 16435 | CG10445         | 14.21390333 | 0.051786333 | 274.4720937 |
| 13 | O16 | 18988 | CG7879          | 9.962142    | 0.057047667 | 174.6283868 |
| 13 | O17 | 16431 | CG10393         | 14.31669667 | 0.048077    | 297.7868142 |
| 13 | O18 | 18842 | CG6749          | 14.63888    | 0.046870667 | 312.3249794 |
| 13 | O19 | 18973 | CG7764          | 23.33125667 | 0.061409333 | 379.9301409 |
| 13 | O20 | 18885 | CG6699          | 1.658573667 | 0.045299    | 36.61391348 |
| 13 | O21 |       | wts             | 71.59907333 | 0.037686333 | 1899.868387 |
| 13 | O22 |       | HFA17794        | 1.688096333 | 0.01105     | 152.7688989 |
| 13 | O23 |       | hpo             | 41.37055    | 0.032975    | 1254.603487 |

|    |     |       |          |             |             |             |
|----|-----|-------|----------|-------------|-------------|-------------|
| 13 | O24 |       | Luc      | 2.014433333 | 0.061143333 | 32.94608297 |
| 13 | P01 | 18882 | CG31731  | 19.48008333 | 0.083441    | 233.4593705 |
| 13 | P02 | 26528 | CG9147   | 15.29934333 | 0.072982333 | 209.6307782 |
| 13 | P03 | 18875 | CG7660   | 12.59088333 | 0.061095    | 206.0869684 |
| 13 | P04 | 26517 | CG9320   | 13.39719667 | 0.065259333 | 205.2916569 |
| 13 | P05 | 18892 | CG6841   | 6.902976333 | 0.085941667 | 80.3216484  |
| 13 | P06 | 21310 | CG8458   | 10.79383133 | 0.059499    | 181.4119789 |
| 13 | P07 | 18895 | CG7540   | 15.26895667 | 0.071401    | 213.8479386 |
| 13 | P08 | 21353 | CG8408   | 12.66565    | 0.058214    | 217.5705157 |
| 13 | P09 | 18888 | CG7714   | 10.960197   | 0.056338667 | 194.5412919 |
| 13 | P10 | 21357 | CG8448   | 12.98539667 | 0.0631      | 205.7907554 |
| 13 | P11 | 18896 | CG7590   | 11.48292333 | 0.059892333 | 191.7260974 |
| 13 | P12 | 21362 | CG8667   | 13.33795333 | 0.048592667 | 274.4849017 |
| 13 | P13 | 18886 | CG7628   | 14.18934    | 0.060065    | 236.2330808 |
| 13 | P14 | 21359 | CG8527   | 11.50105    | 0.045063333 | 255.2196908 |
| 13 | P15 | 26535 | CG8728   | 14.86319667 | 0.048095333 | 309.0361504 |
| 13 | P16 | 21360 | CG32383  | 11.14667067 | 0.050633333 | 220.1449111 |
| 13 | P17 | 26536 | CG8798   | 15.18109    | 0.041032    | 369.9817216 |
| 13 | P18 | 21361 | CG8630   | 11.38725333 | 0.054793333 | 207.8218761 |
| 13 | P19 | 26489 | CG8833   | 14.15518333 | 0.049568333 | 285.5690797 |
| 13 | P20 | 23752 | CG9572   | 12.15790167 | 0.049229667 | 246.9629085 |
| 13 | P21 |       | wts      | 57.25311667 | 0.035023333 | 1634.713524 |
| 13 | P22 |       | HFA17794 | 1.341618667 | 0.010752667 | 124.7707855 |
| 13 | P23 |       | hpo      | 43.97884    | 0.041611    | 1056.904184 |
| 13 | P24 |       | Luc      | 1.960375333 | 0.05017     | 39.07465285 |
| 14 | A01 |       | DIAP1    | 0.455847    | 0.009880333 | 46.13680375 |
| 14 | A02 |       | ex/ft    | 41.41850667 | 0.056044    | 739.0355197 |
| 14 | A03 |       | Luc      | 1.520605    | 0.050459667 | 30.13505836 |
| 14 | A04 |       | hpo      | 38.2939     | 0.039961    | 958.2818248 |
| 14 | A05 | 23672 | CG9698   | 9.108285667 | 0.045550333 | 199.9609004 |
| 14 | A06 | 27118 | CG3000   | 10.00682533 | 0.054424333 | 183.8667508 |
| 14 | A07 | 23665 | CG9873   | 11.350099   | 0.061436333 | 184.7457097 |
| 14 | A08 | 27125 | CG3121   | 12.75823667 | 0.049685    | 256.7824628 |
| 14 | A09 | 23671 | CG9657   | 11.36030033 | 0.050809333 | 223.5868804 |
| 14 | A10 | 27117 | CG1515   | 8.341586667 | 0.048145    | 173.259667  |
| 14 | A11 | 23673 | CG9727   | 11.24155667 | 0.049130667 | 228.8093655 |
| 14 | A12 | 22905 | CG8675   | 8.500735    | 0.047574667 | 178.6819666 |
| 14 | A13 | 23675 | CG9829   | 11.49970133 | 0.052032333 | 221.0106793 |
| 14 | A14 | 22908 | CG9222   | 12.98034    | 0.049211667 | 263.7655028 |
| 14 | A15 | 23691 | CG9949   | 8.425986    | 0.049360667 | 170.7024351 |
| 14 | A16 | 22906 | CG8808   | 10.347595   | 0.046450667 | 222.7652635 |
| 14 | A17 | 27120 | CG8339   | 13.26665667 | 0.038974333 | 340.3947042 |
| 14 | A18 | 22898 | CG9493   | 11.75659333 | 0.037581    | 312.8334353 |
| 14 | A19 | 27124 | CG1193   | 12.01118    | 0.043409333 | 276.6957951 |
| 14 | A20 | 22904 | CG8519   | 11.87765    | 0.033315    | 356.5255891 |
| 14 | A21 | 27123 | CG17957  | 11.33519333 | 0.040312    | 281.186578  |
| 14 | A22 | 22899 | CG9783   | 10.112144   | 0.034459333 | 293.4515274 |
| 14 | A23 | 27121 | CG15097  | 12.77918333 | 0.042609333 | 299.9151203 |
| 14 | A24 | 22897 | CG7643   | 8.172361333 | 0.035894667 | 227.6762007 |
| 14 | B01 |       | DIAP1    | 0.481887667 | 0.012149667 | 39.66262449 |
| 14 | B02 |       | ex/ft    | 41.95495    | 0.06908     | 607.3385929 |
| 14 | B03 |       | Luc      | 1.510127667 | 0.062164667 | 24.29237938 |
| 14 | B04 |       | hpo      | 36.17382    | 0.051876667 | 697.3042473 |
| 14 | B05 | 20417 | CG6946   | 5.840595333 | 0.053853    | 108.4544098 |

|    |     |       |                |             |             |             |
|----|-----|-------|----------------|-------------|-------------|-------------|
| 14 | B06 | 20323 | CG17521        | 0.913358333 | 0.029858333 | 30.58972928 |
| 14 | B07 | 20416 | CG31915        | 11.44507267 | 0.053339    | 214.5723142 |
| 14 | B08 | 20321 | CG31139        | 11.95569933 | 0.064988    | 183.9677992 |
| 14 | B09 | 20411 | CG31318        | 12.94196667 | 0.062907333 | 205.7306514 |
| 14 | B10 | 20322 | CG17302        | 11.89101667 | 0.059857667 | 198.6548646 |
| 14 | B11 | 20413 | CG18802        | 12.63998    | 0.053917333 | 234.4325882 |
| 14 | B12 | 20338 | CG17743        | 8.457632    | 0.047573333 | 177.7809417 |
| 14 | B13 | 20410 | CG7101         | 11.04458267 | 0.054879    | 201.2533513 |
| 14 | B14 | 20226 | CG8232         | 8.829957333 | 0.052131333 | 169.379081  |
| 14 | B15 | 20418 | CG6980         | 11.697622   | 0.051387667 | 227.6348151 |
| 14 | B16 | 20223 | CG7365         | 11.28872667 | 0.048193    | 234.2399657 |
| 14 | B17 | 20448 | CG18398        | 1.290633333 | 0.031361667 | 41.15321252 |
| 14 | B18 | 20225 | CG8169         | 11.142849   | 0.04568     | 243.9327715 |
| 14 | B19 | 20319 | CG3278         | 8.065969    | 0.051635333 | 156.210263  |
| 14 | B20 | 20227 | CG8298         | 10.437643   | 0.045284    | 230.4929556 |
| 14 | B21 | 20320 | CG17065        | 10.77392833 | 0.046657333 | 230.9160761 |
| 14 | B22 | 20234 | CG7269         | 3.219598667 | 0.029243333 | 110.0968426 |
| 14 | B23 | 20325 | CG15095        | 12.72173333 | 0.0398      | 319.641541  |
| 14 | B24 | 20224 | CG8068         | 9.320505333 | 0.074226667 | 125.5681516 |
| 14 | C01 | 23666 | CG9903         | 10.38170667 | 0.054413333 | 190.793433  |
| 14 | C02 | 27126 | CG4909         | 12.42774667 | 0.049861333 | 249.2461761 |
| 14 | C03 | 23674 | CG9773         | 8.610228667 | 0.047509667 | 181.2310898 |
| 14 | C04 | 27116 | CG6159         | 13.40871667 | 0.037430667 | 358.2281017 |
| 14 | C05 | 23684 | CG9701         | 8.003573667 | 0.049905667 | 160.3740457 |
| 14 | C06 | 27130 | CG3073         | 8.326849667 | 0.040934333 | 203.4196966 |
| 14 | C07 | 23677 | CG9882         | 10.28380433 | 0.050237333 | 204.704423  |
| 14 | C08 | 27137 | CG3210         | 14.13536    | 0.041558    | 340.1357139 |
| 14 | C09 | 23750 | CG9935         | 10.38577067 | 0.044528    | 233.2413463 |
| 14 | C10 | 27129 | CG32858        | 14.57686333 | 0.047462    | 307.127035  |
| 14 | C11 | 23685 | CG9733         | 8.387356333 | 0.049617333 | 169.0408527 |
| 14 | C12 | 22917 | CG8707         | 8.709940667 | 0.039399    | 221.0700948 |
| 14 | C13 | 23730 | CG9637         | 12.34632333 | 0.043211667 | 285.7173603 |
| 14 | C14 | 22920 | CG9311         | 7.996654    | 0.043461667 | 183.9932661 |
| 14 | C15 | 23703 | CG9951         | 10.357354   | 0.037994    | 272.6049903 |
| 14 | C16 | 22918 | CG8865         | 11.71582667 | 0.040751    | 287.4978937 |
| 14 | C17 | 27132 | CG8403         | 11.266491   | 0.038301667 | 294.1514556 |
| 14 | C18 | 22910 | CG9575         | 10.209016   | 0.038229    | 267.0489942 |
| 14 | C19 | 27136 | CG1412         | 10.75203433 | 0.044127    | 243.6611221 |
| 14 | C20 | 22938 | CG32555        | 11.300028   | 0.032428667 | 348.4579898 |
| 14 | C21 | 27115 | CG17237        | 9.924761    | 0.034261    | 289.6810076 |
| 14 | C22 | 22911 | CG9784         | 10.796016   | 0.034373667 | 314.0781024 |
| 14 | C23 | 27133 | CG17035,CG6117 | 10.667981   | 0.035117    | 303.7839508 |
| 14 | C24 | 22907 | CG32301        | 12.16902667 | 0.035142    | 346.2815624 |
| 14 | D01 | 20431 | CG7015         | 8.883693333 | 0.067151333 | 132.2936253 |
| 14 | D02 | 20332 | CG17077        | 1.600097667 | 0.116107    | 13.7812334  |
| 14 | D03 | 20427 | CG6877         | 9.683117    | 0.049805333 | 194.4192791 |
| 14 | D04 | 20336 | CG17636        | 8.420983333 | 0.056805333 | 148.2428293 |
| 14 | D05 | 20429 | CG6947         | 4.470015667 | 0.047823    | 93.469997   |
| 14 | D06 | 20335 | CG17544        | 9.255657    | 0.061477333 | 150.5539765 |
| 14 | D07 | 20428 | CG6927         | 8.821069    | 0.046298    | 190.528079  |
| 14 | D08 | 20333 | CG31722        | 10.7611     | 0.047119667 | 228.3781011 |
| 14 | D09 | 20474 | CG18675        | 9.575115667 | 0.047401    | 202.002398  |
| 14 | D10 | 20334 | CG17322        | 9.570886    | 0.037529    | 255.0264062 |
| 14 | D11 | 20425 | CG31212        | 11.92188333 | 0.061807667 | 192.8868048 |

|    |     |       |                 |             |             |             |
|----|-----|-------|-----------------|-------------|-------------|-------------|
| 14 | D12 | 20229 | CG7139          | 10.33970633 | 0.044387667 | 232.9409746 |
| 14 | D13 | 20422 | CG7102          | 10.63265833 | 0.040711    | 261.1740889 |
| 14 | D14 | 20238 | CG8233          | 5.897601333 | 0.044219    | 133.3725623 |
| 14 | D15 | 20412 | CG18332         | 4.802922333 | 0.035945    | 133.6186489 |
| 14 | D16 | 20235 | CG7379          | 7.413397    | 0.052014667 | 142.5251275 |
| 14 | D17 | 20460 | CG18419         | 10.617305   | 0.038336667 | 276.9490914 |
| 14 | D18 | 20221 | CG7192          | 12.25823867 | 0.061015667 | 200.9031342 |
| 14 | D19 | 20331 | CG16941         | 4.506353    | 0.052849333 | 85.26792517 |
| 14 | D20 | 20239 | CG8336          | 10.10225033 | 0.031259333 | 323.1754889 |
| 14 | D21 | 20342 | CG15407         | 11.42101    | 0.037477333 | 304.7444678 |
| 14 | D22 | 20246 | CG7288          | 7.900888    | 0.040375667 | 195.6843974 |
| 14 | D23 | 20337 | CG15099         | 10.98296867 | 0.035877    | 306.1284017 |
| 14 | D24 | 20236 | CG8085          | 13.37543667 | 0.048011667 | 278.5872184 |
| 14 | E01 | 23706 | CG9621          | 17.58919333 | 0.053203333 | 330.6032203 |
| 14 | E02 | 27138 | CG4937          | 16.62647667 | 0.046821667 | 355.1021963 |
| 14 | E03 | 23754 | CG9643          | 14.35329333 | 0.048380333 | 296.6761976 |
| 14 | E04 | 27128 | CG9484          | 25.17552667 | 0.039432    | 638.4542165 |
| 14 | E05 | 23696 | CG31013         | 16.48009    | 0.054388667 | 303.0059571 |
| 14 | E06 | 27142 | CG3077          | 15.91375333 | 0.039524    | 402.6351921 |
| 14 | E07 | 23689 | CG9885          | 16.94528667 | 0.050618    | 334.7680008 |
| 14 | E08 | 27149 | CG3299          | 16.59245667 | 0.041941333 | 395.6110917 |
| 14 | E09 | 23695 | CG9664          | 19.31554333 | 0.049568333 | 389.6750614 |
| 14 | E10 | 27200 | CG1514          | 14.62513333 | 0.041688667 | 350.8179681 |
| 14 | E11 | 23697 | CG9737          | 16.19455667 | 0.048233    | 335.7567779 |
| 14 | E12 | 22929 | CG8726          | 14.42393    | 0.04222     | 341.6373757 |
| 14 | E13 | 23742 | CG9642          | 16.26844667 | 0.044021667 | 369.5554462 |
| 14 | E14 | 22932 | CG9374          | 14.12584667 | 0.065221333 | 216.5832243 |
| 14 | E15 | 23715 | CG9952          | 15.78202333 | 0.041457333 | 380.6811019 |
| 14 | E16 | 22930 | CG8866          | 16.26885333 | 0.040297333 | 403.7203454 |
| 14 | E17 | 27144 | CG8497          | 15.01517667 | 0.043658333 | 343.9246421 |
| 14 | E18 | 22922 | CG31311         | 13.37926    | 0.042959333 | 311.4401217 |
| 14 | E19 | 27148 | CG1424          | 18.00856667 | 0.036990333 | 486.8452118 |
| 14 | E20 | 22950 | CG8250          | 12.81346667 | 0.036429333 | 351.7348657 |
| 14 | E21 | 27147 | CG7250          | 15.40473667 | 0.046619333 | 330.4366572 |
| 14 | E22 | 22939 | CG8418          | 15.24986    | 0.035311    | 431.8727875 |
| 14 | E23 | 27158 | CG8407          | 17.35805333 | 0.037270333 | 465.7337829 |
| 14 | E24 | 22921 | CG7717          | 14.8228     | 0.027221667 | 544.5221331 |
| 14 | F01 | 20443 | CG7017          | 14.47275333 | 0.058313667 | 248.1880177 |
| 14 | F02 | 20316 | CG17999         | 11.98918333 | 0.053733333 | 223.1237593 |
| 14 | F03 | 20439 | CG6878,CG7011   | 16.4471     | 0.056374    | 291.7497428 |
| 14 | F04 | 20348 | CG17646         | 13.79326333 | 0.057984333 | 237.8791398 |
| 14 | F05 | 20441 | CG6949          | 9.695736333 | 0.047953667 | 202.1896761 |
| 14 | F06 | 20347 | CG31217         | 14.82832    | 0.062646667 | 236.6976695 |
| 14 | F07 | 20440 | CG6928          | 11.90321733 | 0.044304    | 268.6713916 |
| 14 | F08 | 20345 | CG17184         | 15.46965333 | 0.046880333 | 329.9817265 |
| 14 | F09 | 20435 | CG32354         | 13.29226333 | 0.045507333 | 292.0905788 |
| 14 | F10 | 20346 | CG17324         | 12.52947    | 0.049857333 | 251.3064611 |
| 14 | F11 | 20437 | CG18495,CG30382 | 1.729802333 | 0.021157667 | 81.757708   |
| 14 | F12 | 20241 | CG7144          | 12.81520333 | 0.041282    | 310.4307769 |
| 14 | F13 | 20434 | CG7108          | 12.17030333 | 0.055139333 | 220.7190874 |
| 14 | F14 | 20250 | CG8251          | 10.64460567 | 0.036898    | 288.4873345 |
| 14 | F15 | 20424 | CG18347         | 14.68356    | 0.037924667 | 387.1770352 |
| 14 | F16 | 20247 | CG7391          | 12.78835333 | 0.037968    | 336.8192513 |
| 14 | F17 | 20329 | CG15117         | 16.02154333 | 0.038346333 | 417.8116117 |

|    |     |       |                 |             |             |             |
|----|-----|-------|-----------------|-------------|-------------|-------------|
| 14 | F18 | 20249 | CG8174          | 13.58664    | 0.037392    | 363.3568678 |
| 14 | F19 | 20343 | CG16944         | 9.307523667 | 0.039868    | 233.4585047 |
| 14 | F20 | 20251 | CG8351          | 6.742209667 | 0.035124333 | 191.9526729 |
| 14 | F21 | 20354 | CG15445         | 10.30822167 | 0.045416333 | 226.9716842 |
| 14 | F22 | 20258 | CG7309          | 12.81250333 | 0.031443667 | 407.4748492 |
| 14 | F23 | 20349 | CG15101         | 15.29952    | 0.039445667 | 387.8631366 |
| 14 | F24 | 20248 | CG8092          | 12.35906    | 0.032662667 | 378.3849043 |
| 14 | G01 | 23718 | CG9630          | 9.885328333 | 0.053149    | 185.9927437 |
| 14 | G02 | 27150 | CG5634          | 15.27937333 | 0.051847667 | 294.6974149 |
| 14 | G03 | 23698 | CG9793          | 12.66756667 | 0.046210667 | 274.1264643 |
| 14 | G04 | 27140 | CG9579          | 14.30988    | 0.047442667 | 301.6246979 |
| 14 | G05 | 23708 | CG9716          | 11.56447    | 0.058805333 | 196.6568225 |
| 14 | G06 | 27154 | CG3093          | 17.10379333 | 0.081821    | 209.0391627 |
| 14 | G07 | 23701 | CG9886          | 14.33261333 | 0.046357333 | 309.1768293 |
| 14 | G08 | 27161 | CG3322          | 11.26954333 | 0.044930333 | 250.8226069 |
| 14 | G09 | 23707 | CG9665          | 13.18306667 | 0.053602667 | 245.9405005 |
| 14 | G10 | 27153 | CG1571          | 11.006899   | 0.045635333 | 241.1924751 |
| 14 | G11 | 23709 | CG9742          | 9.951100333 | 0.042347    | 234.9894995 |
| 14 | G12 | 22941 | CG8742          | 12.636495   | 0.039830333 | 317.258078  |
| 14 | G13 | 23711 | CG15675,CG9865  | 13.19277    | 0.042544667 | 310.0922168 |
| 14 | G14 | 22944 | CG9375          | 3.467432333 | 0.043917    | 78.95421667 |
| 14 | G15 | 23727 | CG32951         | 13.8502     | 0.042994    | 322.1426246 |
| 14 | G16 | 22972 | CG10188         | 12.94749333 | 0.043133667 | 300.1714052 |
| 14 | G17 | 27156 | CG8566          | 11.8443     | 0.037781333 | 313.4960827 |
| 14 | G18 | 22934 | CG14367,CG9611  | 14.09280333 | 0.038548333 | 365.5878767 |
| 14 | G19 | 27160 | CG1453          | 9.238616    | 0.037137667 | 248.7667328 |
| 14 | G20 | 22940 | CG8606          | 13.90789333 | 0.034294333 | 405.5449394 |
| 14 | G21 | 27159 | CG8595          | 12.18318    | 0.036889    | 330.2659329 |
| 14 | G22 | 22951 | CG31319         | 13.67050333 | 0.033729    | 405.3041399 |
| 14 | G23 | 27157 | CG17834,CG18042 | 12.86456333 | 0.034446333 | 373.4668421 |
| 14 | G24 | 22931 | CG9108          | 13.64698667 | 0.032653333 | 417.9354839 |
| 14 | H01 | 20432 | CG31873         | 14.54464    | 0.055422333 | 262.4328339 |
| 14 | H02 | 20356 | CG17110         | 12.39955333 | 0.047675667 | 260.0813832 |
| 14 | H03 | 20451 | CG6895          | 11.60289233 | 0.049930667 | 232.3800804 |
| 14 | H04 | 20360 | CG17664         | 10.033996   | 0.053697667 | 186.8609313 |
| 14 | H05 | 20453 | CG6950          | 10.47262733 | 0.051104667 | 204.9250688 |
| 14 | H06 | 20359 | CG17562         | 9.051439667 | 0.067509333 | 134.0768634 |
| 14 | H07 | 20452 | CG6931          | 11.14198    | 0.049214667 | 226.395519  |
| 14 | H08 | 20357 | CG17209         | 2.80666     | 0.082217667 | 34.13694543 |
| 14 | H09 | 20447 | CG7161          | 12.44398333 | 0.040135667 | 310.0480039 |
| 14 | H10 | 20358 | CG17332         | 7.173859667 | 0.023128    | 310.1807189 |
| 14 | H11 | 20449 | CG18525         | 14.74213333 | 0.044134    | 334.031208  |
| 14 | H12 | 20253 | CG7145          | 13.33978    | 0.045275333 | 294.6368147 |
| 14 | H13 | 20446 | CG7113          | 10.83666333 | 0.043592    | 248.5929375 |
| 14 | H14 | 20262 | CG8256          | 13.34417    | 0.051266333 | 260.2910942 |
| 14 | H15 | 20454 | CG6988          | 14.15919    | 0.037219667 | 380.4222678 |
| 14 | H16 | 20259 | CG7399          | 15.90922333 | 0.044769    | 355.3624904 |
| 14 | H17 | 20341 | CG15141         | 9.535106333 | 0.038426333 | 248.1398954 |
| 14 | H18 | 20261 | CG8177          | 15.04364333 | 0.035150667 | 427.976046  |
| 14 | H19 | 20401 | CG15293         | 11.44293333 | 0.033271333 | 343.9277055 |
| 14 | H20 | 20263 | CG8363          | 12.03326333 | 0.029544333 | 407.2951384 |
| 14 | H21 | 20366 | CG15459         | 11.35783    | 0.032226    | 352.4430584 |
| 14 | H22 | 20270 | CG7324          | 13.29956    | 0.034434333 | 386.2296352 |
| 14 | H23 | 20361 | CG15104         | 13.15412333 | 0.035926333 | 366.1415489 |



|    |     |       |                |             |             |             |
|----|-----|-------|----------------|-------------|-------------|-------------|
| 14 | H24 | 20260 | CG8108         | 8.175147667 | 0.047836    | 170.899483  |
| 14 | I01 | 23702 | CG9918         | 13.04055    | 0.064702333 | 201.5468273 |
| 14 | I02 | 27162 | CG5695         | 12.78625367 | 0.058792667 | 217.4804171 |
| 14 | I03 | 23710 | CG9799         | 9.66636     | 0.058536333 | 165.134361  |
| 14 | I04 | 27152 | CG1099         | 13.11769    | 0.047904    | 273.8328741 |
| 14 | I05 | 23720 | CG9720         | 11.21544767 | 0.055389    | 202.4851084 |
| 14 | I06 | 27166 | CG32758        | 12.03918    | 0.061986    | 194.2241797 |
| 14 | I07 | 23713 | CG9887         | 13.27104667 | 0.059496    | 223.0577966 |
| 14 | I08 | 27173 | CG3399         | 15.49640667 | 0.053828    | 287.8874687 |
| 14 | I09 | 23719 | CG9666         | 11.53260333 | 0.064174333 | 179.7074116 |
| 14 | I10 | 27201 | CG1842         | 11.62297967 | 0.047602667 | 244.1665663 |
| 14 | I11 | 23721 | CG9753         | 7.939824    | 0.048195667 | 164.7414498 |
| 14 | I12 | 22953 | CG8767         | 12.24417    | 0.046112333 | 265.5291787 |
| 14 | I13 | 23723 | CG9868         | 14.30802667 | 0.048125    | 297.309645  |
| 14 | I14 | 22956 | CG9389         | 15.21522333 | 0.052499667 | 289.8156179 |
| 14 | I15 | 23739 | CG9964         | 13.23702333 | 0.045156667 | 293.1355282 |
| 14 | I16 | 22954 | CG8878         | 10.23341    | 0.041528667 | 246.4179763 |
| 14 | I17 | 27168 | CG8624         | 13.36833667 | 0.045990667 | 290.674992  |
| 14 | I18 | 22913 | CG7978         | 12.0505     | 0.043324    | 278.1483704 |
| 14 | I19 | 27172 | CG1782         | 15.60363    | 0.059044667 | 264.2682376 |
| 14 | I20 | 22952 | CG8637         | 10.09990133 | 0.037567667 | 268.8455853 |
| 14 | I21 | 27171 | CG31534        | 12.35506333 | 0.040876667 | 302.2522221 |
| 14 | I22 | 22947 | CG9856         | 13.05951667 | 0.031275333 | 417.5660265 |
| 14 | I23 | 27169 | CG6875         | 13.59995667 | 0.037754333 | 360.2224027 |
| 14 | I24 | 22943 | CG9115         | 16.81872333 | 0.065917667 | 255.1474314 |
| 14 | J01 | 20467 | CG7024         | 13.03492667 | 0.056546    | 230.5189875 |
| 14 | J02 | 20368 | CG17111        | 11.08040667 | 0.058441    | 189.5998814 |
| 14 | J03 | 20444 | CG18174        | 0.514573    | 0.021540667 | 23.88844356 |
| 14 | J04 | 20327 | CG17821        | 9.569253667 | 0.050668667 | 188.8593937 |
| 14 | J05 | 20465 | CG6953         | 9.590980333 | 0.047865333 | 200.3742514 |
| 14 | J06 | 20371 | CG17569        | 8.102598333 | 0.043807667 | 184.9584548 |
| 14 | J07 | 20464 | CG6932         | 7.724279333 | 0.052734333 | 146.4753386 |
| 14 | J08 | 20369 | CG17221        | 14.04441    | 0.049320333 | 284.7590243 |
| 14 | J09 | 20459 | CG33057,CG7163 | 9.264846    | 0.045478333 | 203.7199985 |
| 14 | J10 | 20370 | CG17336        | 13.43356    | 0.050947667 | 263.6737044 |
| 14 | J11 | 20445 | CG7068         | 11.011464   | 0.041535    | 265.1128927 |
| 14 | J12 | 20265 | CG7148         | 13.00666667 | 0.043017333 | 302.3587391 |
| 14 | J13 | 20480 | CG18315        | 12.00479667 | 0.044327    | 270.8235763 |
| 14 | J14 | 20274 | CG8272         | 10.04846767 | 0.041591333 | 241.6000369 |
| 14 | J15 | 20466 | CG32706,CG6999 | 12.66324667 | 0.045069333 | 280.9725756 |
| 14 | J16 | 20271 | CG7400         | 11.21925333 | 0.041859333 | 268.0227428 |
| 14 | J17 | 20353 | CG15143        | 10.77101933 | 0.037253667 | 289.1264216 |
| 14 | J18 | 20273 | CG8199         | 13.74741333 | 0.043286    | 317.5949114 |
| 14 | J19 | 20367 | CG16987        | 10.69376667 | 0.038084333 | 280.7917516 |
| 14 | J20 | 20275 | CG8378         | 13.84940333 | 0.047144333 | 293.7660235 |
| 14 | J21 | 20378 | CG16868        | 12.48096333 | 0.038800667 | 321.6687858 |
| 14 | J22 | 20282 | CG7349         | 10.443874   | 0.035616333 | 293.2327116 |
| 14 | J23 | 20373 | CG15105        | 10.658501   | 0.035825    | 297.5157292 |
| 14 | J24 | 20308 | CG8153         | 11.58444    | 0.039079333 | 296.4339207 |
| 14 | K02 | 27174 | CG5730         | 13.28473333 | 0.071923667 | 184.7060078 |
| 14 | K03 | 23722 | CG9802         | 12.60632333 | 0.061293333 | 205.6720144 |
| 14 | K04 | 27164 | CG1212         | 15.19167    | 0.056739667 | 267.7433776 |
| 14 | K05 | 23732 | CG9722         | 10.402206   | 0.060076667 | 173.1488542 |
| 14 | K06 | 27178 | CG3157         | 8.925225667 | 0.051839667 | 172.169812  |

|    |     |       |                |             |             |             |
|----|-----|-------|----------------|-------------|-------------|-------------|
| 14 | K07 | 23725 | CG9895         | 8.475592667 | 0.073048333 | 116.0271875 |
| 14 | K08 | 27185 | CG3504         | 10.92270033 | 0.059792667 | 182.6762535 |
| 14 | K09 | 23731 | CG13029,CG9668 | 12.028569   | 0.050586667 | 237.7814114 |
| 14 | K1  | 23714 | CG9920         | 10.311234   | 0.048761667 | 211.461886  |
| 14 | K10 | 22924 | CG10060        | 8.542539667 | 0.082745    | 103.2393458 |
| 14 | K11 | 23751 | CG31684        | 10.812836   | 0.050036333 | 216.0996876 |
| 14 | K12 | 22965 | CG8770         | 9.987231    | 0.055173333 | 181.0155449 |
| 14 | K13 | 23735 | CG9870         | 12.56529667 | 0.052918    | 237.4484422 |
| 14 | K14 | 22968 | CG9391         | 9.271110667 | 0.045539667 | 203.5831912 |
| 14 | K15 | 27119 | CG6976         | 11.66671467 | 0.047790333 | 244.1228979 |
| 14 | K16 | 22966 | CG8914         | 9.208129    | 0.053040333 | 173.6061676 |
| 14 | K17 | 27180 | CG8639         | 10.607771   | 0.049465667 | 214.4471452 |
| 14 | K18 | 22958 | CG9738         | 12.13967    | 0.037691333 | 322.0812035 |
| 14 | K19 | 27184 | CG2999         | 12.18888667 | 0.049711333 | 245.1933161 |
| 14 | K20 | 22964 | CG8641         | 11.88733733 | 0.048097333 | 247.1516924 |
| 14 | K21 | 27203 | CG8127         | 6.658961333 | 0.045328333 | 146.9050557 |
| 14 | K22 | 22959 | CG9962         | 10.89768    | 0.037985    | 286.8943004 |
| 14 | K23 | 27194 | CG17766        | 11.35745    | 0.036824    | 308.4252118 |
| 14 | K24 | 22955 | CG9139         | 12.45730667 | 0.037181    | 335.0449602 |
| 14 | L01 | 20479 | CG7039         | 14.01261667 | 0.074426    | 188.2758265 |
| 14 | L02 | 20380 | CG17118        | 14.103      | 0.060339667 | 233.7268464 |
| 14 | L03 | 20475 | CG6903         | 11.69822533 | 0.058423333 | 200.2320762 |
| 14 | L04 | 20339 | CG17829        | 14.26766    | 0.077781667 | 183.4321712 |
| 14 | L05 | 20477 | CG6962         | 2.952712    | 0.048677333 | 60.65886929 |
| 14 | L06 | 20383 | CG17575        | 12.57078667 | 0.062220333 | 202.0366333 |
| 14 | L07 | 20426 | CG18605        | 9.719730333 | 0.061427667 | 158.2304987 |
| 14 | L08 | 20381 | CG17223        | 10.880183   | 0.044035    | 247.0803452 |
| 14 | L09 | 20471 | CG7176         | 11.30582333 | 0.053288333 | 212.1632002 |
| 14 | L10 | 20382 | CG31793        | 11.41574967 | 0.049927333 | 228.6472941 |
| 14 | L11 | 20473 | CG18559        | 12.13915    | 0.048861    | 248.4425206 |
| 14 | L12 | 20277 | CG7154         | 4.455214    | 0.042339667 | 105.2255332 |
| 14 | L13 | 20470 | CG7143         | 11.58526667 | 0.050266    | 230.4791841 |
| 14 | L14 | 20286 | CG8285         | 12.79351333 | 0.044739333 | 285.9567271 |
| 14 | L15 | 20478 | CG7002         | 11.35469333 | 0.042432667 | 267.5932065 |
| 14 | L16 | 20283 | CG7414         | 11.09737167 | 0.049197667 | 225.5670323 |
| 14 | L17 | 20365 | CG33097        | 10.82379    | 0.035528333 | 304.6523432 |
| 14 | L18 | 20285 | CG8205         | 12.82966667 | 0.044834    | 286.1593136 |
| 14 | L19 | 20379 | CG17052        | 12.65144333 | 0.034678333 | 364.8227039 |
| 14 | L20 | 20287 | CG8379         | 11.74158333 | 0.039926333 | 294.0811828 |
| 14 | L21 | 20390 | CG16892        | 12.93399667 | 0.036626333 | 353.1338108 |
| 14 | L22 | 20269 | CG7213         | 13.39744667 | 0.035093667 | 381.7625213 |
| 14 | L23 | 20385 | CG15106        | 14.00453333 | 0.044773333 | 312.7873734 |
| 14 | L24 | 20284 | CG8111         | 11.30845    | 0.042648    | 265.1578034 |
| 14 | M01 | 23726 | CG9926         | 11.814848   | 0.053799333 | 219.6095615 |
| 14 | M02 | 27177 | CG1762         | 9.927544667 | 0.060988    | 162.7786559 |
| 14 | M03 | 23758 | CG9826         | 12.64425667 | 0.053033    | 238.4224288 |
| 14 | M04 | 27189 | CG1763         | 11.37520333 | 0.058973    | 192.8883274 |
| 14 | M05 | 23744 | CG32573,CG9723 | 9.19693     | 0.046168333 | 199.2042887 |
| 14 | M06 | 27190 | CG3571         | 11.42087667 | 0.055529    | 205.6740922 |
| 14 | M07 | 23737 | CG9897         | 11.91072    | 0.056458667 | 210.9635367 |
| 14 | M08 | 27197 | CG3510         | 6.578570333 | 0.068146    | 96.53641202 |
| 14 | M09 | 23743 | CG9673         | 13.53152333 | 0.048208333 | 280.6884702 |
| 14 | M10 | 22936 | CG10079        | 9.483473333 | 0.036151    | 262.3294883 |
| 14 | M11 | 23745 | CG9768         | 10.533895   | 0.054241667 | 194.2030112 |

|    |     |       |                 |             |             |             |
|----|-----|-------|-----------------|-------------|-------------|-------------|
| 14 | M12 | 22973 | CG8173          | 12.23541    | 0.041635    | 293.8731836 |
| 14 | M13 | 23747 | CG9871          | 11.76937667 | 0.046926    | 250.8071574 |
| 14 | M14 | 22975 | CG8487          | 6.590123    | 0.048500667 | 135.876957  |
| 14 | M15 | 27131 | CG7034          | 11.420967   | 0.044952667 | 254.066507  |
| 14 | M16 | 22978 | CG8948          | 10.015092   | 0.036352333 | 275.5006648 |
| 14 | M17 | 27192 | CG8649          | 11.61829967 | 0.046181667 | 251.5781804 |
| 14 | M18 | 22937 | CG8057          | 11.30173667 | 0.052088667 | 216.9711262 |
| 14 | M19 | 27196 | CG3020          | 12.09643    | 0.037915    | 319.040749  |
| 14 | M20 | 22991 | CG9210          | 11.28184367 | 0.042136667 | 267.7440946 |
| 14 | M21 | 27195 | CG1134          | 11.522147   | 0.043461667 | 265.1105649 |
| 14 | M22 | 22971 | CG9994          | 9.684255    | 0.037611667 | 257.4800815 |
| 14 | M23 | 27193 | CG7129          | 15.59276333 | 0.045143667 | 345.4031204 |
| 14 | M24 | 20420 | CG18143         | 12.70792333 | 0.041453667 | 306.5572808 |
| 14 | N01 | 20491 | CG7042          | 12.83048667 | 0.061725667 | 207.8630715 |
| 14 | N02 | 20392 | CG17121         | 11.09155667 | 0.056702667 | 195.6090836 |
| 14 | N03 | 20487 | CG6910          | 12.39698    | 0.056391333 | 219.8383912 |
| 14 | N04 | 20396 | CG17723         | 10.89108767 | 0.059850333 | 181.9720469 |
| 14 | N05 | 20489 | CG6966          | 12.01169333 | 0.043055    | 278.9848643 |
| 14 | N06 | 20395 | CG17593         | 8.673423    | 0.047154333 | 183.9369234 |
| 14 | N07 | 20488 | CG6937          | 4.734957667 | 0.059445    | 79.65274904 |
| 14 | N08 | 20340 | CG18005         | 9.947916333 | 0.05662     | 175.6961557 |
| 14 | N09 | 20483 | CG7184          | 13.99704667 | 0.05834     | 239.9219518 |
| 14 | N10 | 20388 | CG18031         | 11.24288667 | 0.039009    | 288.2126347 |
| 14 | N11 | 20469 | CG7081          | 13.38831    | 0.053114667 | 252.064276  |
| 14 | N12 | 20289 | CG7185          | 16.02676    | 0.081519    | 196.6015285 |
| 14 | N13 | 20486 | CG30427         | 13.04031667 | 0.049516    | 263.3556157 |
| 14 | N14 | 20298 | CG8290          | 9.162331    | 0.04658     | 196.7009661 |
| 14 | N15 | 20493 | CG10962         | 11.33533067 | 0.042567    | 266.2938583 |
| 14 | N16 | 20295 | CG7420          | 13.70897667 | 0.048284333 | 283.921838  |
| 14 | N17 | 20377 | CG15199         | 12.69457667 | 0.044641667 | 284.3661004 |
| 14 | N18 | 20297 | CG8209          | 10.68334733 | 0.04835     | 220.9585798 |
| 14 | N19 | 20391 | CG17058         | 10.15101533 | 0.042763667 | 237.3747652 |
| 14 | N20 | 20245 | CG7207          | 9.837323667 | 0.041706333 | 235.8712186 |
| 14 | N21 | 20402 | CG16935         | 12.50150333 | 0.035619    | 350.978504  |
| 14 | N22 | 20305 | CG7261          | 10.08469767 | 0.038909667 | 259.1823197 |
| 14 | N23 | 20397 | CG18608         | 11.98580333 | 0.042063333 | 284.9465885 |
| 14 | N24 | 20296 | CG8144          | 10.28977833 | 0.032806667 | 313.6490043 |
| 14 | O01 | 23738 | CG9927          | 11.193674   | 0.060403667 | 185.3144787 |
| 14 | O02 | 27198 | CG5870          | 12.92289333 | 0.062509333 | 206.7354208 |
| 14 | O03 | 23746 | CG9817          | 8.948972    | 0.057078    | 156.7849609 |
| 14 | O04 | 27188 | CG1467          | 8.489075    | 0.055004667 | 154.3337232 |
| 14 | O05 | 23756 | CG9726          | 11.89896467 | 0.061240667 | 194.2984183 |
| 14 | O06 | 27202 | CG4376          | 12.76497333 | 0.048895333 | 261.0673139 |
| 14 | O07 | 23749 | CG32833,CG32834 | 13.32114    | 0.052528    | 253.6007463 |
| 14 | O08 | 27208 | CG2977,CG3035   | 11.24762333 | 0.062907    | 178.7976431 |
| 14 | O09 | 23755 | CG9692          | 12.37991333 | 0.058627667 | 211.1616245 |
| 14 | O10 | 22948 | CG10089         | 8.614190333 | 0.051723    | 166.5446771 |
| 14 | O11 | 23757 | CG9769          | 3.383517    | 0.049538    | 68.30144536 |
| 14 | O12 | 22989 | CG8805          | 9.643902    | 0.057056333 | 169.0242158 |
| 14 | O13 | 23759 | CG30410         | 11.05214333 | 0.054993    | 200.9736391 |
| 14 | O14 | 22987 | CG8500          | 11.844206   | 0.052802333 | 224.3121705 |
| 14 | O15 | 27143 | CG7121          | 12.97587333 | 0.059224667 | 219.0957596 |
| 14 | O16 | 22990 | CG8967          | 10.88827733 | 0.054242667 | 200.7327073 |
| 14 | O17 | 27155 | CG7152          | 10.904837   | 0.051401333 | 212.1508586 |

|    |     |       |          |             |             |             |
|----|-----|-------|----------|-------------|-------------|-------------|
| 14 | O18 | 22949 | CG8114   | 7.446919    | 0.049261    | 151.1727127 |
| 14 | O19 | 27167 | CG7293   | 13.43842333 | 0.056048    | 239.7663312 |
| 14 | O20 | 22988 | CG8657   | 11.03345    | 0.044894    | 245.7666949 |
| 14 | O21 |       | wts      | 57.57080667 | 0.036116333 | 1594.03797  |
| 14 | O22 |       | HFA17794 | 1.368534    | 0.010732    | 127.5190086 |
| 14 | O23 |       | hpo      | 37.17961333 | 0.037729667 | 985.4211982 |
| 14 | O24 |       | Luc      | 1.922235333 | 0.03817     | 50.3598463  |
| 14 | P01 | 20503 | CG7048   | 15.11683    | 0.072480333 | 208.5645761 |
| 14 | P02 | 20362 | CG17765  | 12.78255667 | 0.092505667 | 138.1813366 |
| 14 | P03 | 20499 | CG32772  | 12.05992    | 0.060637333 | 198.8860548 |
| 14 | P04 | 20386 | CG32684  | 11.738717   | 0.075495667 | 155.4886197 |
| 14 | P05 | 20414 | CG7052   | 11.80519733 | 0.060449    | 195.2918548 |
| 14 | P06 | 20399 | CG17976  | 12.53093333 | 0.057631667 | 217.431389  |
| 14 | P07 | 20450 | CG18642  | 12.59063    | 0.054598333 | 230.6046583 |
| 14 | P08 | 20405 | CG17294  | 9.986961    | 0.056029    | 178.2462832 |
| 14 | P09 | 20456 | CG18250  | 10.79399667 | 0.065616    | 164.5025096 |
| 14 | P10 | 20400 | CG18067  | 11.40125333 | 0.049503    | 230.3143917 |
| 14 | P11 | 20497 | CG18578  | 11.31529867 | 0.049510667 | 228.542644  |
| 14 | P12 | 20301 | CG7188   | 10.219442   | 0.066476    | 153.7313015 |
| 14 | P13 | 20494 | CG7149   | 11.65422    | 0.049258    | 236.5954769 |
| 14 | P14 | 20310 | CG8295   | 8.126501667 | 0.036138667 | 224.8699915 |
| 14 | P15 | 20502 | CG7010   | 13.38305667 | 0.043377333 | 308.5264962 |
| 14 | P16 | 20293 | CG7254   | 9.125686667 | 0.050101333 | 182.144587  |
| 14 | P17 | 20389 | CG15261  | 11.95741333 | 0.046991333 | 254.4599713 |
| 14 | P18 | 20309 | CG8230   | 11.69709333 | 0.049324    | 237.1481091 |
| 14 | P19 | 20403 | CG17064  | 9.331572667 | 0.050334333 | 185.3918002 |
| 14 | P20 | 20257 | CG7212   | 8.062826333 | 0.038714667 | 208.2628375 |
| 14 | P21 |       | wts      | 57.08418    | 0.033366    | 1710.848768 |
| 14 | P22 |       | HFA17794 | 1.165354333 | 0.010265333 | 113.5232822 |
| 14 | P23 |       | hpo      | 35.96456    | 0.031354    | 1147.048542 |
| 14 | P24 |       | Luc      | 1.700324    | 0.048522333 | 35.04209058 |
| 15 | A01 |       | DIAP1    | 0.362660333 | 0.009046667 | 40.08773029 |
| 15 | A02 |       | ex/ft    | 35.69796667 | 0.040489    | 881.6707418 |
| 15 | A03 |       | Luc      | 1.653003333 | 0.059809    | 27.63803664 |
| 15 | A04 |       | hpo      | 26.40701667 | 0.043551667 | 606.3376832 |
| 15 | A05 | 20218 | CG8484   | 10.36152967 | 0.045147    | 229.5064936 |
| 15 | A06 | 16261 | CG10185  | 11.817098   | 0.063575    | 185.8764923 |
| 15 | A07 | 20220 | CG14938  | 8.505604333 | 0.054418667 | 156.2993887 |
| 15 | A08 | 16252 | CG10253  | 11.85716    | 0.047518667 | 249.5263616 |
| 15 | A09 | 20299 | CG8398   | 9.668333    | 0.079243333 | 122.0081563 |
| 15 | A10 | 16258 | CG10062  | 10.59249833 | 0.057482333 | 184.2739798 |
| 15 | A11 | 17500 | CG14168  | 9.831794    | 0.050067    | 196.3727405 |
| 15 | A12 | 16259 | CG10101  | 8.500566333 | 0.040390667 | 210.4586786 |
| 15 | A13 | 17503 | CG7425   | 2.231717    | 0.080976    | 27.56022772 |
| 15 | A14 | 16322 | CG10248  | 10.490711   | 0.04261     | 246.2030275 |
| 15 | A15 | 17502 | CG17041  | 10.342575   | 0.035669667 | 289.9543496 |
| 15 | A16 | 17745 | CG4004   | 8.413244    | 0.039335667 | 213.8833459 |
| 15 | A17 | 17504 | CG1044   | 12.39487    | 0.039523    | 313.6115679 |
| 15 | A18 | 17749 | CG5108   | 11.79215    | 0.052851333 | 223.1192527 |
| 15 | A19 | 16255 | CG9262   | 9.611335667 | 0.046498333 | 206.7027994 |
| 15 | A20 | 17751 | CG7544   | 10.87949    | 0.043480333 | 250.216343  |
| 15 | A21 | 16257 | CG10016  | 10.50061833 | 0.043946667 | 238.940041  |
| 15 | A22 | 17753 | CG9540   | 10.069138   | 0.047135667 | 213.6203583 |
| 15 | A23 | 16256 | CG9296   | 15.13580667 | 0.041591667 | 363.9144059 |

|    |     |       |         |             |             |             |
|----|-----|-------|---------|-------------|-------------|-------------|
| 15 | A24 | 17754 | CG10579 | 9.630070333 | 0.054125667 | 177.920586  |
| 15 | B01 |       | DIAP1   | 0.375811    | 0.011415    | 32.92255804 |
| 15 | B02 |       | ex/ft   | 34.42867333 | 0.05419     | 635.3325952 |
| 15 | B03 |       | Luc     | 1.409685333 | 0.059158667 | 23.82888954 |
| 15 | B04 |       | hpo     | 36.74493667 | 0.056304667 | 652.6090792 |
| 15 | B05 | 17746 | CG1386  | 10.83013733 | 0.058215667 | 186.0347558 |
| 15 | B06 | 27792 | CG8869  | 9.022044667 | 0.055449333 | 162.7079015 |
| 15 | B07 | 17747 | CG5012  | 8.224792    | 0.055806333 | 147.3809783 |
| 15 | B08 | 27793 | CG11440 | 10.53973033 | 0.056971667 | 184.9995085 |
| 15 | B09 | 17756 | CG17060 | 11.88729333 | 0.050758    | 234.1954634 |
| 15 | B10 | 27794 | CG12523 | 10.42327333 | 0.055882333 | 186.5217988 |
| 15 | B11 | 28175 | CG10396 | 10.009336   | 0.058996    | 169.6612652 |
| 15 | B12 | 27790 | CG3240  | 9.874935667 | 0.049326667 | 200.1946682 |
| 15 | B13 | 28170 | CG10109 | 12.20936    | 0.047963    | 254.5578884 |
| 15 | B14 | 27795 | CG13029 | 9.238544667 | 0.043502    | 212.370573  |
| 15 | B15 | 28168 | CG10652 | 0.942893333 | 0.027525667 | 34.25505891 |
| 15 | B16 | 27786 | CG13613 | 9.659303    | 0.043618333 | 221.4505292 |
| 15 | B17 | 28165 | CG10005 | 11.93663533 | 0.049676667 | 240.2865598 |
| 15 | B18 | 27787 | CG31917 | 12.05951333 | 0.042535    | 283.519768  |
| 15 | B19 | 28174 | CG10332 | 11.18243333 | 0.049584    | 225.525035  |
| 15 | B20 | 27789 | CG17721 | 10.58403633 | 0.041532667 | 254.8364259 |
| 15 | B21 | 28176 | CG10436 | 9.367765333 | 0.039034667 | 239.9857904 |
| 15 | B22 | 22614 | CG3303  | 10.15940933 | 0.040166667 | 252.9313527 |
| 15 | B23 | 28167 | CG10573 | 11.15438333 | 0.041466333 | 268.998545  |
| 15 | B24 | 22621 | CG3244  | 9.217246    | 0.039615667 | 232.6666891 |
| 15 | C01 | 20240 | CG8431  | 9.422106    | 0.067050667 | 140.5221822 |
| 15 | C02 | 16265 | CG10297 | 10.24728333 | 0.047148    | 217.342906  |
| 15 | C03 | 20219 | CG8578  | 9.744709    | 0.056662333 | 171.9786042 |
| 15 | C04 | 16266 | CG30170 | 9.874454333 | 0.054739333 | 180.3904749 |
| 15 | C05 | 20230 | CG8494  | 9.742617667 | 0.052456    | 185.7293287 |
| 15 | C06 | 16273 | CG10189 | 12.67056333 | 0.054331333 | 233.2091365 |
| 15 | C07 | 20232 | CG14967 | 11.70642867 | 0.047633667 | 245.7595538 |
| 15 | C08 | 16264 | CG10262 | 10.61790233 | 0.054609667 | 194.4326523 |
| 15 | C09 | 20311 | CG8399  | 12.80084767 | 0.048583333 | 263.4822847 |
| 15 | C10 | 16270 | CG10078 | 9.124161    | 0.041269667 | 221.086375  |
| 15 | C11 | 17507 | CG14366 | 10.62833867 | 0.051123    | 207.8973978 |
| 15 | C12 | 16271 | CG10104 | 9.595926    | 0.042656667 | 224.95724   |
| 15 | C13 | 17510 | CG16837 | 11.985197   | 0.046615667 | 257.1066308 |
| 15 | C14 | 16334 | CG10250 | 10.27216567 | 0.046203667 | 222.3236035 |
| 15 | C15 | 17509 | CG7276  | 11.27368    | 0.053361333 | 211.2705829 |
| 15 | C16 | 17757 | CG4035  | 6.696405667 | 0.037543333 | 178.3647074 |
| 15 | C17 | 17532 | CG8936  | 9.560225333 | 0.038426333 | 248.7935877 |
| 15 | C18 | 17761 | CG5359  | 9.641786667 | 0.038294    | 251.783221  |
| 15 | C19 | 16267 | CG9272  | 9.532989667 | 0.049055    | 194.332681  |
| 15 | C20 | 17763 | CG7891  | 8.932458    | 0.040528667 | 220.3985163 |
| 15 | C21 | 16335 | CG9259  | 12.35345667 | 0.043182    | 286.0788446 |
| 15 | C22 | 17810 | CG32920 | 12.98483    | 0.048346333 | 268.5794166 |
| 15 | C23 | 16268 | CG9298  | 10.393257   | 0.043034333 | 241.5108169 |
| 15 | C24 | 17766 | CG10580 | 10.337578   | 0.047440333 | 217.9069428 |
| 15 | D01 | 17767 | CG11419 | 10.78846333 | 0.064602667 | 166.9971828 |
| 15 | D02 | 28216 | CG10675 | 9.531961333 | 0.048969667 | 194.6503209 |
| 15 | D03 | 17760 | CG6426  | 8.322203    | 0.049162333 | 169.2800654 |
| 15 | D04 | 27808 | CG13194 | 9.387510667 | 0.048094    | 195.1908901 |
| 15 | D05 | 17758 | CG1738  | 7.514811333 | 0.056543333 | 132.9035784 |

|    |     |       |                |             |             |             |
|----|-----|-------|----------------|-------------|-------------|-------------|
| 15 | D06 | 27804 | CG9129         | 8.890216333 | 0.057796667 | 153.8188419 |
| 15 | D07 | 17759 | CG5024         | 10.264723   | 0.059630667 | 172.1383237 |
| 15 | D08 | 27805 | CG11582        | 10.45394967 | 0.048215    | 216.8194476 |
| 15 | D09 | 17768 | CG17320        | 11.094421   | 0.047915333 | 231.5421855 |
| 15 | D10 | 27806 | CG31530        | 5.193723333 | 0.039003333 | 133.1610119 |
| 15 | D11 | 28187 | CG10399        | 12.12177333 | 0.052364667 | 231.4876443 |
| 15 | D12 | 27802 | CG3367         | 7.738018    | 0.041311667 | 187.3082987 |
| 15 | D13 | 28226 | CG10563        | 12.68077667 | 0.043714667 | 290.0805984 |
| 15 | D14 | 27807 | CG13031,CG9695 | 9.269355    | 0.046529667 | 199.2138707 |
| 15 | D15 | 28180 | CG10654        | 11.23108    | 0.039960333 | 281.0557136 |
| 15 | D16 | 27798 | CG13658        | 10.03442633 | 0.043074    | 232.9578477 |
| 15 | D17 | 28244 | CG1028         | 11.254156   | 0.043123    | 260.9780396 |
| 15 | D18 | 27833 | CG16986        | 9.490551    | 0.043388667 | 218.7334096 |
| 15 | D19 | 28186 | CG10339        | 8.829429333 | 0.043466    | 203.1341585 |
| 15 | D20 | 27860 | CG14375        | 8.764579    | 0.040281667 | 217.5823327 |
| 15 | D21 | 28256 | CG10298        | 9.385765    | 0.045022667 | 208.4675497 |
| 15 | D22 | 22626 | CG3304         | 11.71164333 | 0.033420333 | 350.4346655 |
| 15 | D23 | 28169 | CG10059        | 15.68424333 | 0.043119667 | 363.737583  |
| 15 | D24 | 22633 | CG3249         | 6.908717    | 0.034132    | 202.4117251 |
| 15 | E01 | 20252 | CG8439         | 7.663545333 | 0.055478667 | 138.1349948 |
| 15 | E02 | 16277 | CG10301        | 16.56596667 | 0.050079667 | 330.792271  |
| 15 | E03 | 20231 | CG8583         | 17.31418667 | 0.039763333 | 435.4309666 |
| 15 | E04 | 16278 | CG10334        | 16.00219667 | 0.052965    | 302.1277573 |
| 15 | E05 | 20242 | CG8507         | 13.51105    | 0.051955667 | 260.0495936 |
| 15 | E06 | 16285 | CG10191        | 12.24720333 | 0.042313667 | 289.4384793 |
| 15 | E07 | 20244 | CG14993        | 16.03419    | 0.046577333 | 344.2487762 |
| 15 | E08 | 16308 | CG10173        | 16.17684    | 0.046972667 | 344.3883677 |
| 15 | E09 | 17508 | CG3029         | 16.80355667 | 0.041748333 | 402.4964669 |
| 15 | E10 | 16272 | CG10148        | 16.00197667 | 0.045006333 | 355.5494412 |
| 15 | E11 | 17514 | CG6416         | 16.68308667 | 0.045666667 | 365.3230657 |
| 15 | E12 | 16283 | CG10105        | 15.56775333 | 0.048795    | 319.0440277 |
| 15 | E13 | 17517 | CG17248        | 14.72878    | 0.05057     | 291.2552897 |
| 15 | E14 | 17764 | CG8663         | 12.68092333 | 0.035761667 | 354.5954234 |
| 15 | E15 | 17516 | CG12192        | 13.02604667 | 0.042361    | 307.5009246 |
| 15 | E16 | 17769 | CG4140         | 10.98423633 | 0.03959     | 277.4497685 |
| 15 | E17 | 17539 | CG8953         | 14.71825333 | 0.041222667 | 357.0427273 |
| 15 | E18 | 17773 | CG5327,CG5493  | 13.82898    | 0.040461333 | 341.7826073 |
| 15 | E19 | 16279 | CG9283         | 12.35572667 | 0.049502667 | 249.5971934 |
| 15 | E20 | 17775 | CG7929         | 13.14438667 | 0.036804333 | 357.1423655 |
| 15 | E21 | 16281 | CG10021        | 12.69492    | 0.045233333 | 280.6540899 |
| 15 | E22 | 17822 | CG33088        | 16.24528667 | 0.036955667 | 439.588516  |
| 15 | E23 | 16340 | CG10006        | 15.49509    | 0.038407    | 403.4444242 |
| 15 | E24 | 17750 | CG6457         | 16.59053667 | 0.039694    | 417.9608169 |
| 15 | F01 | 17779 | CG12190        | 13.90591333 | 0.056537333 | 245.9598377 |
| 15 | F02 | 28228 | CG10683        | 12.13981333 | 0.054773333 | 221.6372931 |
| 15 | F03 | 17772 | CG6534         | 10.21406133 | 0.053755667 | 190.0090161 |
| 15 | F04 | 27820 | CG13201        | 9.900939667 | 0.045526    | 217.478796  |
| 15 | F05 | 17770 | CG1946         | 13.78879333 | 0.045010333 | 306.3472832 |
| 15 | F06 | 27816 | CG9183         | 13.54246667 | 0.048626333 | 278.5006752 |
| 15 | F07 | 17771 | CG31302        | 5.006961    | 0.034782333 | 143.9512684 |
| 15 | F08 | 27817 | CG31976        | 12.17902667 | 0.047313667 | 257.4103325 |
| 15 | F09 | 17780 | CG17331        | 0.910784333 | 0.020074667 | 45.36983595 |
| 15 | F10 | 27818 | CG12645        | 12.98664333 | 0.047318333 | 274.4526787 |
| 15 | F11 | 28199 | CG10406        | 10.97869    | 0.042867667 | 256.1065449 |

|    |     |       |                        |             |             |             |
|----|-----|-------|------------------------|-------------|-------------|-------------|
| 15 | F12 | 27814 | CG30161                | 13.19582667 | 0.046611333 | 283.103394  |
| 15 | F13 | 28220 | CG10263                | 10.33743    | 0.040927667 | 252.5780442 |
| 15 | F14 | 27819 | CG13042,CG32160        | 14.21029667 | 0.044242333 | 321.192297  |
| 15 | F15 | 28192 | CG10670                | 14.64658333 | 0.043014333 | 340.5047155 |
| 15 | F16 | 27810 | CG32176                | 16.79694333 | 0.051384667 | 326.8862955 |
| 15 | F17 | 28178 | CG10513                | 13.89078333 | 0.049159333 | 282.5665523 |
| 15 | F18 | 27845 | CG17262                | 14.80166    | 0.036772333 | 402.5216422 |
| 15 | F19 | 28255 | CG10228                | 15.41649333 | 0.035257    | 437.2604967 |
| 15 | F20 | 27813 | CG18193                | 12.55674333 | 0.033994    | 369.3811653 |
| 15 | F21 | 28200 | CG10460                | 14.34746667 | 0.042239333 | 339.670765  |
| 15 | F22 | 22638 | CG3313                 | 13.68267    | 0.032999333 | 414.6347401 |
| 15 | F23 | 28191 | CG10584                | 13.45967667 | 0.041390333 | 325.1888927 |
| 15 | F24 | 22645 | CG3252                 | 15.07505    | 0.035467333 | 425.0404128 |
| 15 | G01 | 20264 | CG8443                 | 11.08820233 | 0.060047667 | 184.6566728 |
| 15 | G02 | 16289 | CG10305                | 1.877592333 | 0.037022333 | 50.71512691 |
| 15 | G03 | 20243 | CG8603                 | 11.85075333 | 0.050556    | 234.4084448 |
| 15 | G04 | 16290 | CG10335                | 12.51925667 | 0.061838667 | 202.4503008 |
| 15 | G05 | 20254 | CG8525                 | 14.50664667 | 0.058602    | 247.5452487 |
| 15 | G06 | 16297 | CG10195                | 13.01687    | 0.047546333 | 273.7723203 |
| 15 | G07 | 20256 | CG14997                | 12.77821    | 0.040494    | 315.5581074 |
| 15 | G08 | 16288 | CG10269                | 5.475408333 | 0.044275    | 123.6681724 |
| 15 | G09 | 17515 | CG5269                 | 12.90728    | 0.046254667 | 279.0481681 |
| 15 | G10 | 16284 | CG10168                | 12.99337667 | 0.046553333 | 279.1073321 |
| 15 | G11 | 17521 | CG9765                 | 10.97148833 | 0.046264333 | 237.1478749 |
| 15 | G12 | 16262 | CG10231                | 11.99575    | 0.038324333 | 313.0060971 |
| 15 | G13 | 17524 | CG1014                 | 11.59669667 | 0.038734667 | 299.3880589 |
| 15 | G14 | 17776 | CG8765                 | 9.889692333 | 0.049466333 | 199.9277421 |
| 15 | G15 | 17499 | CG31772                | 14.0639     | 0.043473333 | 323.5063641 |
| 15 | G16 | 17781 | CG4247                 | 12.92635667 | 0.045064333 | 286.8422921 |
| 15 | G17 | 17533 | CG13930                | 16.14872667 | 0.045127    | 357.8506585 |
| 15 | G18 | 17785 | CG5497                 | 15.46224667 | 0.043466    | 355.7319898 |
| 15 | G19 | 16291 | CG9287                 | 11.86366667 | 0.044314333 | 267.7162393 |
| 15 | G20 | 17787 | CG8208                 | 12.51213667 | 0.038557333 | 324.5073138 |
| 15 | G21 | 16293 | CG10029                | 12.48511333 | 0.035809    | 348.6585309 |
| 15 | G22 | 17834 | CG7375                 | 12.33837667 | 0.031746667 | 388.651092  |
| 15 | G23 | 16292 | CG9304                 | 19.87745333 | 0.039279667 | 506.0494403 |
| 15 | G24 | 17762 | CG7011                 | 14.29832333 | 0.038287333 | 373.4478766 |
| 15 | H01 | 17791 | CG12265                | 9.569017333 | 0.052158    | 183.4621215 |
| 15 | H02 | 28252 | CG10697                | 11.63220333 | 0.049563    | 234.6953036 |
| 15 | H03 | 17784 | CG6653                 | 10.74945633 | 0.041670333 | 257.9642511 |
| 15 | H04 | 27832 | CG13217                | 10.23483    | 0.055543333 | 184.2674788 |
| 15 | H05 | 17782 | CG2065                 | 12.29365333 | 0.045953333 | 267.5247352 |
| 15 | H06 | 27828 | CG32466                | 10.646127   | 0.044174667 | 241.0007319 |
| 15 | H07 | 17783 | CG5161                 | 11.57370667 | 0.046667    | 248.0062285 |
| 15 | H08 | 27829 | CG11776                | 10.76008933 | 0.044775333 | 240.3128806 |
| 15 | H09 | 17792 | CG31447,CG3678,CG17556 | 9.782106667 | 0.054963333 | 177.9751349 |
| 15 | H10 | 27830 | CG12678                | 11.95897667 | 0.041184667 | 290.3744921 |
| 15 | H11 | 28211 | CG10417                | 12.47362333 | 0.042982667 | 290.2012439 |
| 15 | H12 | 27826 | CG5164                 | 10.35949333 | 0.040211333 | 257.6262082 |
| 15 | H13 | 28206 | CG10119                | 13.94916667 | 0.042483667 | 328.3418726 |
| 15 | H14 | 27831 | CG13058                | 11.94929333 | 0.039363667 | 303.5614907 |
| 15 | H15 | 28183 | CG10205                | 6.486095    | 0.048147333 | 134.7134836 |
| 15 | H16 | 27822 | CG11099,CG13869        | 13.13276    | 0.046297333 | 283.661262  |
| 15 | H17 | 28201 | CG10017                | 13.49274333 | 0.038175333 | 353.441402  |

|    |     |       |         |             |             |             |
|----|-----|-------|---------|-------------|-------------|-------------|
| 15 | H18 | 27823 | CG14119 | 12.018588   | 0.040853    | 294.1910753 |
| 15 | H19 | 28173 | CG1030  | 11.27242333 | 0.038355    | 293.8971016 |
| 15 | H20 | 27825 | CG18599 | 13.38479667 | 0.036157667 | 370.178662  |
| 15 | H21 | 28212 | CG10462 | 9.289295667 | 0.042786333 | 217.1089444 |
| 15 | H22 | 22625 | CG3279  | 13.13041333 | 0.037612    | 349.1017051 |
| 15 | H23 | 28203 | CG10587 | 12.28368333 | 0.038115667 | 322.2738681 |
| 15 | H24 | 22657 | CG3253  | 15.44605667 | 0.037359333 | 413.4457253 |
| 15 | I01 | 20276 | CG8453  | 11.83757333 | 0.057638    | 205.3779335 |
| 15 | I02 | 16301 | CG10309 | 12.27937667 | 0.052963667 | 231.8452902 |
| 15 | I03 | 20255 | CG8605  | 10.412335   | 0.05829     | 178.6298679 |
| 15 | I04 | 16302 | CG10336 | 12.5369     | 0.05185     | 241.7917068 |
| 15 | I05 | 20266 | CG8531  | 10.38536833 | 0.045578667 | 227.8559048 |
| 15 | I06 | 16309 | CG10197 | 9.051299    | 0.058372667 | 155.0605706 |
| 15 | I07 | 20268 | CG14999 | 14.00732667 | 0.059483    | 235.4845362 |
| 15 | I08 | 16300 | CG10270 | 10.58530333 | 0.055202    | 191.7557939 |
| 15 | I09 | 17522 | CG5864  | 9.061884667 | 0.046924333 | 193.1169613 |
| 15 | I10 | 16332 | CG10181 | 13.67557667 | 0.055593333 | 245.9931047 |
| 15 | I11 | 17527 | CG2013  | 9.130581333 | 0.060928667 | 149.8569037 |
| 15 | I12 | 16307 | CG10132 | 11.26192333 | 0.045675667 | 246.5628672 |
| 15 | I13 | 17530 | CG5110  | 11.48916467 | 0.043659667 | 263.152826  |
| 15 | I14 | 17788 | CG8816  | 9.852601333 | 0.038417    | 256.4646207 |
| 15 | I15 | 17529 | CG17347 | 10.47989633 | 0.045447333 | 230.594307  |
| 15 | I16 | 17793 | CG4609  | 7.022837333 | 0.044373    | 158.2682562 |
| 15 | I17 | 16263 | CG9235  | 14.13649333 | 0.040704667 | 347.2941677 |
| 15 | I18 | 17797 | CG5807  | 12.35980333 | 0.043403333 | 284.7662238 |
| 15 | I19 | 16303 | CG9288  | 12.03656333 | 0.03754     | 320.6330137 |
| 15 | I20 | 17799 | CG8287  | 13.65367333 | 0.035231    | 387.5471412 |
| 15 | I21 | 16305 | CG10032 | 12.34877    | 0.042853333 | 288.1635812 |
| 15 | I22 | 17801 | CG10215 | 6.739462667 | 0.039116    | 172.29427   |
| 15 | I23 | 16304 | CG9308  | 13.54644    | 0.048931    | 276.8478061 |
| 15 | I24 | 17774 | CG7077  | 11.28085833 | 0.036918    | 305.5652618 |
| 15 | J01 | 17803 | CG13389 | 1.199784    | 0.044139667 | 27.18153739 |
| 15 | J02 | 27785 | CG15535 | 12.34161933 | 0.066654    | 185.1594703 |
| 15 | J03 | 17796 | CG7056  | 11.27644    | 0.051727    | 217.9991107 |
| 15 | J04 | 27844 | CG13228 | 13.35826    | 0.061969    | 215.5635882 |
| 15 | J05 | 17794 | CG2811  | 11.27361433 | 0.052194    | 215.9944502 |
| 15 | J06 | 27840 | CG10581 | 12.22610333 | 0.055422667 | 220.5975293 |
| 15 | J07 | 17795 | CG5292  | 9.199261667 | 0.054040667 | 170.2285008 |
| 15 | J08 | 27841 | CG11878 | 9.470946667 | 0.052843667 | 179.2257666 |
| 15 | J09 | 17804 | CG17642 | 9.708456    | 0.051269333 | 189.3618537 |
| 15 | J10 | 27842 | CG12825 | 12.29878333 | 0.042812    | 287.2742066 |
| 15 | J11 | 28223 | CG10421 | 13.73522    | 0.048794    | 281.4940362 |
| 15 | J12 | 27838 | CG5347  | 11.21476667 | 0.048705667 | 230.2558908 |
| 15 | J13 | 28218 | CG10133 | 11.67815667 | 0.048799333 | 239.3097583 |
| 15 | J14 | 27843 | CG13068 | 9.314764333 | 0.043468667 | 214.2868656 |
| 15 | J15 | 28195 | CG10206 | 8.243473    | 0.045846667 | 179.8052857 |
| 15 | J16 | 27834 | CG13919 | 10.08638967 | 0.044598    | 226.1623765 |
| 15 | J17 | 28202 | CG10560 | 11.02561333 | 0.034040333 | 323.8985125 |
| 15 | J18 | 27835 | CG14145 | 12.60546333 | 0.040368    | 312.2637568 |
| 15 | J19 | 28222 | CG10360 | 11.22684333 | 0.038783333 | 289.4759777 |
| 15 | J20 | 27837 | CG1279  | 10.71859967 | 0.03568     | 300.4091835 |
| 15 | J21 | 28257 | CG10328 | 11.35652233 | 0.052855333 | 214.8604808 |
| 15 | J22 | 22637 | CG3281  | 13.83250333 | 0.040123    | 344.7524695 |
| 15 | J23 | 28205 | CG1007  | 12.45661333 | 0.039450333 | 315.754324  |



|    |     |       |         |             |             |             |
|----|-----|-------|---------|-------------|-------------|-------------|
| 15 | J24 | 22669 | CG3254  | 12.69968433 | 0.039613333 | 320.5911562 |
| 15 | K02 | 16313 | CG31556 | 11.32239067 | 0.059126    | 191.4959691 |
| 15 | K03 | 20267 | CG8611  | 10.174468   | 0.057199667 | 177.8763513 |
| 15 | K04 | 16314 | CG10340 | 8.666386    | 0.048324667 | 179.3366949 |
| 15 | K05 | 20278 | CG8548  | 10.669951   | 0.053764667 | 198.4565638 |
| 15 | K06 | 16321 | CG10202 | 10.98821433 | 0.050722    | 216.6360619 |
| 15 | K07 | 20280 | CG15002 | 8.585666333 | 0.054200667 | 158.4051795 |
| 15 | K08 | 16312 | CG10274 | 6.774812667 | 0.056393    | 120.1357024 |
| 15 | K09 | 17528 | CG9893  | 8.290089    | 0.059018333 | 140.4663353 |
| 15 | K1  | 20288 | CG8460  | 9.869242667 | 0.049369    | 199.9076884 |
| 15 | K10 | 16318 | CG10092 | 10.494919   | 0.046389667 | 226.2339817 |
| 15 | K11 | 17534 | CG3201  | 8.258817667 | 0.04895     | 168.719462  |
| 15 | K12 | 16286 | CG10238 | 10.88698733 | 0.049586667 | 219.5547325 |
| 15 | K13 | 17537 | CG6056  | 21.00683333 | 0.039211667 | 535.7291622 |
| 15 | K14 | 17800 | CG8971  | 7.533663667 | 0.043707667 | 172.3648101 |
| 15 | K15 | 17536 | CG9699  | 9.850436    | 0.048126333 | 204.6787137 |
| 15 | K16 | 17805 | CG4612  | 9.265520333 | 0.042442667 | 218.3067432 |
| 15 | K17 | 16275 | CG9241  | 10.85102    | 0.046367    | 234.0246296 |
| 15 | K18 | 17809 | CG5869  | 11.64750333 | 0.038765333 | 300.4618388 |
| 15 | K19 | 16315 | CG9289  | 12.43842667 | 0.044828667 | 277.4659072 |
| 15 | K20 | 17811 | CG8386  | 11.69373    | 0.053519333 | 218.4954347 |
| 15 | K21 | 16317 | CG10034 | 12.27403133 | 0.046202667 | 265.6563402 |
| 15 | K22 | 17813 | CG10241 | 10.93802667 | 0.040036667 | 273.2002331 |
| 15 | K23 | 16316 | CG12437 | 5.273142667 | 0.047161333 | 111.8107206 |
| 15 | K24 | 17836 | CG9396  | 11.54435333 | 0.041667667 | 277.0578306 |
| 15 | L01 | 17815 | CG32810 | 13.20949333 | 0.066245667 | 199.4016212 |
| 15 | L02 | 27797 | CG15881 | 11.36598    | 0.064005333 | 177.5786393 |
| 15 | L03 | 17808 | CG7535  | 12.13361    | 0.050379    | 240.8465829 |
| 15 | L04 | 27856 | CG32406 | 10.687476   | 0.052687667 | 202.8458779 |
| 15 | L05 | 17806 | CG3365  | 13.30210333 | 0.053351667 | 249.3287307 |
| 15 | L06 | 27852 | CG10747 | 11.30337333 | 0.049895333 | 226.5416939 |
| 15 | L07 | 17807 | CG5369  | 11.34876    | 0.052906333 | 214.5066438 |
| 15 | L08 | 27853 | CG11885 | 11.703309   | 0.058580667 | 199.7810825 |
| 15 | L09 | 17778 | CG10640 | 14.43596667 | 0.054805333 | 263.4044132 |
| 15 | L10 | 27854 | CG12849 | 10.21333867 | 0.059563    | 171.471193  |
| 15 | L11 | 28235 | CG10422 | 11.27888267 | 0.057292    | 196.8666248 |
| 15 | L12 | 27812 | CG14312 | 9.337925333 | 0.048586333 | 192.1924272 |
| 15 | L13 | 28230 | CG10134 | 12.13089    | 0.05583     | 217.2826437 |
| 15 | L14 | 27875 | CG32742 | 9.84304     | 0.049809667 | 197.613047  |
| 15 | L15 | 28207 | CG10214 | 12.59732667 | 0.046104333 | 273.2351984 |
| 15 | L16 | 27803 | CG32029 | 10.264339   | 0.046590333 | 220.3104864 |
| 15 | L17 | 28225 | CG10031 | 11.26873067 | 0.052739    | 213.6697826 |
| 15 | L18 | 27847 | CG14167 | 9.882977667 | 0.045426667 | 217.5589448 |
| 15 | L19 | 28197 | CG10303 | 10.65148467 | 0.045916333 | 231.9759417 |
| 15 | L20 | 22673 | CG3294  | 11.34762    | 0.043527333 | 260.7010155 |
| 15 | L21 | 28236 | CG10472 | 10.30578867 | 0.037316667 | 276.1712014 |
| 15 | L22 | 22649 | CG3285  | 12.04189333 | 0.040992333 | 293.7596461 |
| 15 | L23 | 28227 | CG10627 | 10.62664467 | 0.033771667 | 314.6615407 |
| 15 | L24 | 22681 | CG3260  | 12.42659    | 0.044436333 | 279.649311  |
| 15 | M01 | 20300 | CG8465  | 8.152349667 | 0.046661    | 174.7144225 |
| 15 | M02 | 16325 | CG10318 | 17.17365667 | 0.060213667 | 285.2119397 |
| 15 | M03 | 20279 | CG32387 | 12.85082433 | 0.052700667 | 243.8455744 |
| 15 | M04 | 16326 | CG10341 | 11.15409333 | 0.050392333 | 221.3450459 |
| 15 | M05 | 20290 | CG8552  | 11.2592     | 0.057821    | 194.7250999 |

|    |     |       |                |             |             |             |
|----|-----|-------|----------------|-------------|-------------|-------------|
| 15 | M06 | 16333 | CG10222        | 11.437231   | 0.055763333 | 205.1030725 |
| 15 | M07 | 20292 | CG15011        | 10.95781333 | 0.041864333 | 261.7457979 |
| 15 | M08 | 16324 | CG10278        | 13.61091333 | 0.050939667 | 267.1967491 |
| 15 | M09 | 17535 | CG13956        | 13.75761333 | 0.0627      | 219.4196704 |
| 15 | M10 | 16330 | CG10094        | 13.31343333 | 0.048082    | 276.8901737 |
| 15 | M11 | 17541 | CG4254         | 64.78989333 | 0.061293333 | 1057.046335 |
| 15 | M12 | 16298 | CG10242        | 12.74251333 | 0.047744667 | 266.8887275 |
| 15 | M13 | 17544 | CG12799        | 11.54261667 | 0.043294667 | 266.6059715 |
| 15 | M14 | 17812 | CG9218         | 13.69769667 | 0.045912667 | 298.3424327 |
| 15 | M15 | 17543 | CG1873         | 11.71984    | 0.039117    | 299.6098883 |
| 15 | M16 | 17817 | CG4904         | 0.870197667 | 0.019308667 | 45.06772434 |
| 15 | M17 | 16287 | CG9243         | 12.40307    | 0.040921333 | 303.0954514 |
| 15 | M18 | 17821 | CG6141         | 1.337001667 | 0.032525333 | 41.10647085 |
| 15 | M19 | 16327 | CG9294         | 10.89072333 | 0.042253333 | 257.7482644 |
| 15 | M20 | 17823 | CG8415         | 1.924622667 | 0.041484333 | 46.39396399 |
| 15 | M21 | 16329 | CG10041        | 11.91433667 | 0.038256333 | 311.4343595 |
| 15 | M22 | 17825 | CG10268        | 11.57976333 | 0.036847    | 314.2661094 |
| 15 | M23 | 16328 | CG9333         | 12.14924    | 0.0396      | 306.7989899 |
| 15 | M24 | 17798 | CG7206         | 12.30126    | 0.040030333 | 307.2984653 |
| 15 | N01 | 17827 | CG16916        | 0.896956667 | 0.021052667 | 42.60537066 |
| 15 | N02 | 27809 | CG16765        | 11.65396633 | 0.053569333 | 217.5492135 |
| 15 | N03 | 17820 | CG32089        | 11.148133   | 0.059965667 | 185.9085977 |
| 15 | N04 | 27788 | CG14285        | 14.19742333 | 0.053794    | 263.9220607 |
| 15 | N05 | 17818 | CG3977         | 8.1724      | 0.047883667 | 170.6719758 |
| 15 | N06 | 27864 | CG10918        | 10.88576667 | 0.049761    | 218.761011  |
| 15 | N07 | 17819 | CG32856,CG5516 | 11.0786     | 0.049839333 | 222.2862799 |
| 15 | N08 | 27865 | CG12299        | 11.09699967 | 0.046581    | 238.2301725 |
| 15 | N09 | 17790 | CG10641        | 13.92757667 | 0.046648667 | 298.5632315 |
| 15 | N10 | 27866 | CG12897        | 9.774511667 | 0.045578    | 214.456792  |
| 15 | N11 | 28247 | CG10425        | 13.49871667 | 0.044928    | 300.452205  |
| 15 | N12 | 27862 | CG5697         | 13.00377667 | 0.048995    | 265.41028   |
| 15 | N13 | 28196 | CG10247        | 11.94838333 | 0.047811667 | 249.9051835 |
| 15 | N14 | 27867 | CG13073        | 12.73564667 | 0.047086667 | 270.4724621 |
| 15 | N15 | 28219 | CG10217        | 11.7488     | 0.041117    | 285.7406912 |
| 15 | N16 | 27815 | CG6545         | 12.13035    | 0.04322     | 280.6652013 |
| 15 | N17 | 28237 | CG10033        | 11.15047    | 0.044093667 | 252.8814418 |
| 15 | N18 | 27859 | CG14254        | 11.431063   | 0.039322    | 290.7040079 |
| 15 | N19 | 28246 | CG10392        | 8.990714    | 0.034361667 | 261.6495319 |
| 15 | N20 | 22685 | CG3297         | 9.143462667 | 0.040136667 | 227.8082219 |
| 15 | N21 | 28248 | CG10475        | 12.79739333 | 0.044455    | 287.8729802 |
| 15 | N22 | 22661 | CG3289         | 11.45172333 | 0.040000667 | 286.2883119 |
| 15 | N23 | 28229 | CG10086        | 10.29924767 | 0.035712    | 288.3973921 |
| 15 | N24 | 22693 | CG3262         | 11.62638433 | 0.037657333 | 308.7415731 |
| 15 | O01 | 20312 | CG8478         | 14.31737    | 0.062261    | 229.9572766 |
| 15 | O02 | 16337 | CG10321        | 10.35513767 | 0.067210333 | 154.0706191 |
| 15 | O03 | 20291 | CG30359        | 9.789887333 | 0.066206    | 147.8700923 |
| 15 | O04 | 16338 | CG10347        | 10.61184467 | 0.057647667 | 184.0810787 |
| 15 | O05 | 20302 | CG8571         | 11.00318    | 0.05271     | 208.7493834 |
| 15 | O06 | 16345 | CG10226        | 11.09526    | 0.059250667 | 187.2596652 |
| 15 | O07 | 20304 | CG15087        | 9.725821333 | 0.047814333 | 203.4080715 |
| 15 | O08 | 16336 | CG10286        | 11.934      | 0.058442667 | 204.2001278 |
| 15 | O09 | 17542 | CG1618         | 12.19800667 | 0.058660333 | 207.9430166 |
| 15 | O10 | 16342 | CG32919        | 10.189376   | 0.056255    | 181.1283619 |
| 15 | O11 | 17548 | CG4443         | 8.291336333 | 0.046993    | 176.4376893 |

|    |     |       |          |             |             |             |
|----|-----|-------|----------|-------------|-------------|-------------|
| 15 | O12 | 16344 | CG10183  | 11.91254333 | 0.055501    | 214.6365531 |
| 15 | O13 | 17549 | CG5596   | 11.66099333 | 0.049252333 | 236.7602212 |
| 15 | O14 | 17824 | CG9282   | 1.028091667 | 0.037550667 | 27.378786   |
| 15 | O15 | 17550 | CG6359   | 10.025197   | 0.046274    | 216.6485932 |
| 15 | O16 | 17829 | CG5104   | 11.14598667 | 0.045725667 | 243.7577728 |
| 15 | O17 | 16311 | CG9254   | 12.2858     | 0.053485667 | 229.7026618 |
| 15 | O18 | 17833 | CG6153   | 11.01869667 | 0.043828333 | 251.4057877 |
| 15 | O19 | 16323 | CG9257   | 11.95465    | 0.059291    | 201.6267224 |
| 15 | O20 | 17835 | CG8560   | 9.572490333 | 0.053710667 | 178.2232642 |
| 15 | O21 |       | wts      | 47.92421667 | 0.041977333 | 1141.668917 |
| 15 | O22 |       | HFA17794 | 1.21593     | 0.012899667 | 94.26057521 |
| 15 | O23 |       | hpo      | 34.68409667 | 0.038111    | 910.0809915 |
| 15 | O24 |       | Luc      | 2.018763667 | 0.046331667 | 43.57200619 |
| 15 | P01 | 17814 | CG10863  | 13.39350333 | 0.056983667 | 235.0410936 |
| 15 | P02 | 27836 | CG4135   | 10.279673   | 0.066079333 | 155.5656282 |
| 15 | P03 | 17826 | CG10944  | 1.334757667 | 0.049705333 | 26.85340943 |
| 15 | P04 | 27863 | CG7428   | 10.48975633 | 0.060724333 | 172.7438698 |
| 15 | P05 | 17830 | CG10706  | 10.58553967 | 0.065553667 | 161.4789867 |
| 15 | P06 | 27876 | CG11112  | 9.632314667 | 0.058081667 | 165.8408792 |
| 15 | P07 | 17831 | CG33177  | 8.906271667 | 0.055089    | 161.6705997 |
| 15 | P08 | 27848 | CG14358  | 8.577775333 | 0.052081    | 164.700665  |
| 15 | P09 | 17802 | CG10682  | 6.492705333 | 0.059497667 | 109.1253775 |
| 15 | P10 | 27869 | CG17608  | 9.031409667 | 0.049707667 | 181.690477  |
| 15 | P11 | 28243 | CG10225  | 14.72945    | 0.065909667 | 223.4793581 |
| 15 | P12 | 27874 | CG6333   | 9.018133333 | 0.058978333 | 152.9058694 |
| 15 | P13 | 28208 | CG10252  | 12.27727667 | 0.052123    | 235.5443214 |
| 15 | P14 | 27879 | CG13170  | 10.37524733 | 0.053824    | 192.7624728 |
| 15 | P15 | 28231 | CG10221  | 9.721437    | 0.043240333 | 224.8233594 |
| 15 | P16 | 27827 | CG6888   | 10.61777867 | 0.045328667 | 234.2398188 |
| 15 | P17 | 28253 | CG10107  | 16.66660333 | 0.03087     | 539.8964475 |
| 15 | P18 | 27871 | CG14275  | 10.53293667 | 0.045707333 | 230.4430361 |
| 15 | P19 | 28221 | CG10320  | 8.280708667 | 0.055299333 | 149.7433724 |
| 15 | P20 | 22697 | CG3301   | 9.467985    | 0.042917667 | 220.6081023 |
| 15 | P21 |       | wts      | 48.96810667 | 0.035549    | 1377.481973 |
| 15 | P22 |       | HFA17794 | 1.063533333 | 0.011268333 | 94.3824878  |
| 15 | P23 |       | hpo      | 32.68399333 | 0.036736333 | 889.691223  |
| 15 | P24 |       | Luc      | 1.520187333 | 0.050065333 | 30.36407095 |
| 16 | A01 |       | DIAP1    | 0.408414333 | 0.010046    | 40.65442299 |
| 16 | A02 |       | ex/ft    | 34.92357    | 0.046558667 | 750.0981557 |
| 16 | A03 |       | Luc      | 1.579083    | 0.057254    | 27.5803088  |
| 16 | A04 |       | hpo      | 31.82093667 | 0.045646333 | 697.1192283 |
| 16 | A05 | 22615 | CG3332   | 10.28452367 | 0.056858    | 180.8808552 |
| 16 | A06 | 22140 | CG1244   | 4.085150667 | 0.064794333 | 63.04796201 |
| 16 | A07 | 22618 | CG3495   | 10.98481667 | 0.046723333 | 235.1034458 |
| 16 | A08 | 22167 | CG1578   | 11.16727    | 0.051036    | 218.8116232 |
| 16 | A09 | 22619 | CG3539   | 3.108985333 | 0.049544667 | 62.75116057 |
| 16 | A10 | 22169 | CG1764   | 9.390602    | 0.04336     | 216.5729244 |
| 16 | A11 | 22610 | CG3666   | 11.13268133 | 0.048091667 | 231.4887818 |
| 16 | A12 | 20702 | CG15062  | 7.258602667 | 0.043215    | 167.9648887 |
| 16 | A13 | 22620 | CG3634   | 10.40968633 | 0.053165    | 195.7996113 |
| 16 | A14 | 20705 | CG15254  | 10.00988933 | 0.041609333 | 240.5683661 |
| 16 | A15 | 22611 | CG4402   | 11.63606333 | 0.039854667 | 291.96238   |
| 16 | A16 | 20706 | CG32972  | 11.87755667 | 0.040886667 | 290.4995108 |
| 16 | A17 | 22689 | CG3466   | 8.564828667 | 0.040608667 | 210.911349  |

|    |     |       |         |             |             |             |
|----|-----|-------|---------|-------------|-------------|-------------|
| 16 | A18 | 20700 | CG15000 | 9.802782333 | 0.041196333 | 237.9527871 |
| 16 | A19 | 22136 | CG8152  | 9.323552    | 0.040839667 | 228.2964765 |
| 16 | A20 | 20704 | CG15204 | 10.45157633 | 0.04581     | 228.1505421 |
| 16 | A21 | 22139 | CG1089  | 9.782352333 | 0.042286667 | 231.3342031 |
| 16 | A22 | 20708 | CG14955 | 11.1804     | 0.040987667 | 272.7747371 |
| 16 | A23 | 22130 | CG7065  | 10.95190267 | 0.055185333 | 198.4567639 |
| 16 | A24 | 20719 | CG15336 | 10.319351   | 0.036805333 | 280.3765125 |
| 16 | B01 |       | DIAP1   | 0.353967333 | 0.011679667 | 30.30628728 |
| 16 | B02 |       | ex/ft   | 32.28509667 | 0.042410667 | 761.2494498 |
| 16 | B03 |       | Luc     | 1.612109333 | 0.053053667 | 30.38638863 |
| 16 | B04 |       | hpo     | 33.90414333 | 0.045884333 | 738.9045644 |
| 16 | B05 | 27410 | CG13305 | 10.435427   | 0.047939    | 217.6813659 |
| 16 | B06 | 25489 | CG13432 | 9.914564667 | 0.05245     | 189.0288783 |
| 16 | B07 | 27407 | CG11444 | 9.621709667 | 0.048086667 | 200.0910093 |
| 16 | B08 | 30172 | CG4169  | 1.971695667 | 0.026764    | 73.66969312 |
| 16 | B09 | 27408 | CG12443 | 10.61989333 | 0.050648333 | 209.6790286 |
| 16 | B10 | 30174 | CG4302  | 5.912146    | 0.038232333 | 154.6373314 |
| 16 | B11 | 27402 | CG8329  | 11.40088667 | 0.040857667 | 279.0391032 |
| 16 | B12 | 30171 | CG4087  | 3.658151333 | 0.033158667 | 110.3226306 |
| 16 | B13 | 27406 | CG9811  | 9.656031333 | 0.046064    | 209.6220765 |
| 16 | B14 | 30173 | CG4264  | 1.621659333 | 0.029391    | 55.17537115 |
| 16 | B15 | 27409 | CG12883 | 9.377602667 | 0.050484667 | 185.7515021 |
| 16 | B16 | 30168 | CG4793  | 10.532663   | 0.042385333 | 248.4978216 |
| 16 | B17 | 27411 | CG13596 | 9.466024    | 0.041467333 | 228.2766515 |
| 16 | B18 | 30205 | CG3945  | 10.12843433 | 0.038789667 | 261.111662  |
| 16 | B19 | 27404 | CG14925 | 9.808181667 | 0.037695667 | 260.1938773 |
| 16 | B20 | 30267 | CG5027  | 11.55727667 | 0.043465667 | 265.8943841 |
| 16 | B21 | 27405 | CG15147 | 9.720834    | 0.039952    | 243.3128254 |
| 16 | B22 | 30269 | CG5178  | 8.948694333 | 0.035158    | 254.527969  |
| 16 | B23 | 24050 | CG32031 | 9.792689667 | 0.034084    | 287.3104585 |
| 16 | B24 | 30266 | CG4956  | 11.21021    | 0.035324667 | 317.3479344 |
| 16 | C01 | 22624 | CG4435  | 4.710148    | 0.052511    | 89.69831083 |
| 16 | C02 | 22153 | CG1433  | 7.824660667 | 0.038371667 | 203.9176649 |
| 16 | C03 | 22628 | CG3415  | 9.181771667 | 0.043579    | 210.6925736 |
| 16 | C04 | 22144 | CG1646  | 8.561136333 | 0.055425667 | 154.4615852 |
| 16 | C05 | 22627 | CG3335  | 4.144569    | 0.051880333 | 79.88709273 |
| 16 | C06 | 22217 | CG1812  | 9.049442333 | 0.048041667 | 188.366536  |
| 16 | C07 | 22630 | CG3496  | 10.25655933 | 0.042061333 | 243.8476986 |
| 16 | C08 | 22179 | CG1598  | 8.405159333 | 0.044948667 | 186.9946309 |
| 16 | C09 | 22631 | CG3564  | 9.415773333 | 0.036239    | 259.8243145 |
| 16 | C10 | 22181 | CG1795  | 8.807272667 | 0.038932333 | 226.2200057 |
| 16 | C11 | 22622 | CG3671  | 6.92505     | 0.033681333 | 205.604984  |
| 16 | C12 | 20714 | CG15064 | 9.120252667 | 0.033329667 | 273.6376801 |
| 16 | C13 | 22632 | CG3644  | 9.426942667 | 0.041978    | 224.5686471 |
| 16 | C14 | 20717 | CG15255 | 9.917126    | 0.04035     | 245.777596  |
| 16 | C15 | 22623 | CG4404  | 15.11107333 | 0.058384667 | 258.8192105 |
| 16 | C16 | 20718 | CG15296 | 10.34886667 | 0.038813667 | 266.6294518 |
| 16 | C17 | 22150 | CG8679  | 9.725013333 | 0.040612    | 239.4615713 |
| 16 | C18 | 20712 | CG15004 | 9.305183667 | 0.033463667 | 278.0682631 |
| 16 | C19 | 22209 | CG8489  | 9.061396    | 0.038536667 | 235.1369951 |
| 16 | C20 | 20716 | CG15208 | 10.965624   | 0.039902667 | 274.8093026 |
| 16 | C21 | 22147 | CG7366  | 10.789627   | 0.033572    | 321.3876743 |
| 16 | C22 | 20720 | CG14962 | 11.774944   | 0.040577333 | 290.1852594 |
| 16 | C23 | 22137 | CG8252  | 9.364366667 | 0.035989667 | 260.1959822 |

|    |     |       |                 |             |             |             |
|----|-----|-------|-----------------|-------------|-------------|-------------|
| 16 | C24 | 20731 | CG15337         | 11.19663533 | 0.036305    | 308.4047744 |
| 16 | D01 | 20711 | CG16870         | 13.88988    | 0.062568333 | 221.9953651 |
| 16 | D02 | 25519 | CG32474         | 8.760877667 | 0.048174    | 181.8590457 |
| 16 | D03 | 20710 | CG15450         | 9.297472667 | 0.057887333 | 160.6132487 |
| 16 | D04 | 25512 | CG14806,CG3848  | 8.957795    | 0.050824    | 176.2512789 |
| 16 | D05 | 27422 | CG13358         | 8.926526667 | 0.059679667 | 149.5740034 |
| 16 | D06 | 30179 | CG4716          | 8.771923    | 0.049401    | 177.5656971 |
| 16 | D07 | 27419 | CG11475         | 11.55704333 | 0.044241667 | 261.2253155 |
| 16 | D08 | 30184 | CG4178          | 8.739610667 | 0.047723    | 183.1320467 |
| 16 | D09 | 27420 | CG12672         | 9.047949    | 0.037956333 | 238.3778465 |
| 16 | D10 | 30176 | CG4510          | 5.355154667 | 0.043424    | 123.3224638 |
| 16 | D11 | 27439 | CG14755         | 10.479671   | 0.040069667 | 261.536266  |
| 16 | D12 | 30183 | CG4098          | 10.304626   | 0.046906333 | 219.685174  |
| 16 | D13 | 27418 | CG9985          | 21.00771    | 0.063247    | 332.1534618 |
| 16 | D14 | 30213 | CG3907          | 10.36644067 | 0.052222667 | 198.5046212 |
| 16 | D15 | 27421 | CG13011         | 10.005318   | 0.042914333 | 233.1462992 |
| 16 | D16 | 30180 | CG4795          | 11.05443    | 0.037087    | 298.0675169 |
| 16 | D17 | 27423 | CG13641         | 11.20287    | 0.042221667 | 265.3346228 |
| 16 | D18 | 30217 | CG3969          | 8.736713667 | 0.044801667 | 195.0086753 |
| 16 | D19 | 27416 | CG14932         | 12.26585667 | 0.032374333 | 378.8759614 |
| 16 | D20 | 30279 | CG5039          | 10.03257167 | 0.038332    | 261.7283645 |
| 16 | D21 | 27417 | CG15166         | 8.689449    | 0.040993333 | 211.9722475 |
| 16 | D22 | 30285 | CG4849          | 4.024936667 | 0.044836667 | 89.76886477 |
| 16 | D23 | 24118 | CG31478         | 8.879054    | 0.036091333 | 246.0162366 |
| 16 | D24 | 30313 | CG4910          | 10.00965433 | 0.038979333 | 256.7938822 |
| 16 | E01 | 22636 | CG4347,CG4437   | 14.47669333 | 0.055215    | 262.1876905 |
| 16 | E02 | 22165 | CG1441          | 17.89837333 | 0.052099    | 343.5454295 |
| 16 | E03 | 22640 | CG3416          | 0.806644    | 0.019656    | 41.03805454 |
| 16 | E04 | 22156 | CG1666          | 12.142      | 0.054913667 | 221.1107132 |
| 16 | E05 | 22639 | CG3342          | 15.63562333 | 0.043860333 | 356.4866508 |
| 16 | E06 | 22164 | CG1271          | 13.60512    | 0.045226333 | 300.8229719 |
| 16 | E07 | 22642 | CG3502          | 16.24097667 | 0.050500667 | 321.5992528 |
| 16 | E08 | 22191 | CG1603          | 13.21607333 | 0.044547333 | 296.6748477 |
| 16 | E09 | 22643 | CG3587          | 18.53987    | 0.04012     | 462.1104187 |
| 16 | E10 | 22193 | CG1803          | 13.18719333 | 0.046029333 | 286.4954232 |
| 16 | E11 | 22634 | CG3672          | 16.95738667 | 0.039684333 | 427.3068297 |
| 16 | E12 | 20726 | CG15073         | 16.12388667 | 0.038295667 | 421.0368449 |
| 16 | E13 | 22644 | CG3645          | 15.64064    | 0.036743667 | 425.6690042 |
| 16 | E14 | 20773 | CG15057         | 13.03910333 | 0.038673667 | 337.1571526 |
| 16 | E15 | 22698 | CG3331          | 24.09560667 | 0.038822333 | 620.6635356 |
| 16 | E16 | 20721 | CG15398         | 14.24168667 | 0.035463333 | 401.5890591 |
| 16 | E17 | 22170 | CG7313          | 16.38015667 | 0.032106333 | 510.1845949 |
| 16 | E18 | 20724 | CG15008         | 13.00774333 | 0.030249    | 430.0222597 |
| 16 | E19 | 22160 | CG8175          | 14.48474333 | 0.03145     | 460.5641759 |
| 16 | E20 | 20728 | CG15209         | 15.93567667 | 0.034842667 | 457.3609942 |
| 16 | E21 | 22163 | CG1105          | 14.33082667 | 0.040293    | 355.6654175 |
| 16 | E22 | 20732 | CG14964         | 17.13559333 | 0.030662667 | 558.8422403 |
| 16 | E23 | 22221 | CG8501          | 7.131676333 | 0.024423667 | 291.9985943 |
| 16 | E24 | 20743 | CG15343         | 12.88902    | 0.03641     | 353.9967042 |
| 16 | F01 | 20723 | CG16876         | 15.22099    | 0.065071667 | 233.9111749 |
| 16 | F02 | 25531 | CG14562         | 12.97329333 | 0.043617667 | 297.4320803 |
| 16 | F03 | 20781 | CG15446         | 13.37278333 | 0.050762    | 263.4408284 |
| 16 | F04 | 25524 | CG14812,CG14813 | 12.30469333 | 0.037768    | 325.7967945 |
| 16 | F05 | 27434 | CG13392         | 15.88516333 | 0.043434667 | 365.7254574 |

|    |     |       |                |             |             |             |
|----|-----|-------|----------------|-------------|-------------|-------------|
| 16 | F06 | 30191 | CG4723         | 12.64606333 | 0.04467     | 283.0996941 |
| 16 | F07 | 27431 | CG11539,CG1775 | 12.66957667 | 0.043832    | 289.0485642 |
| 16 | F08 | 30196 | CG4186         | 11.69052    | 0.039336    | 297.1964613 |
| 16 | F09 | 27432 | CG30222        | 12.01087    | 0.050554    | 237.5849587 |
| 16 | F10 | 30198 | CG4328         | 13.02329    | 0.047164667 | 276.1238639 |
| 16 | F11 | 27451 | CG14842        | 7.647068    | 0.034806333 | 219.703349  |
| 16 | F12 | 30195 | CG4101         | 13.92383333 | 0.038273333 | 363.7998607 |
| 16 | F13 | 27430 | CG10052        | 14.98732    | 0.037711    | 397.4256848 |
| 16 | F14 | 30225 | CG3919         | 8.513788667 | 0.045093667 | 188.8023152 |
| 16 | F15 | 27460 | CG14112        | 11.07012967 | 0.038186    | 289.9002165 |
| 16 | F16 | 30178 | CG4655         | 13.81253333 | 0.030869    | 447.4564558 |
| 16 | F17 | 27435 | CG13731        | 12.76257333 | 0.034163667 | 373.5715331 |
| 16 | F18 | 30229 | CG3978         | 14.16112333 | 0.030608667 | 462.6507743 |
| 16 | F19 | 27496 | CG14286        | 12.96751667 | 0.035457667 | 365.7182744 |
| 16 | F20 | 30291 | CG5057         | 4.711665    | 0.026622333 | 176.9816695 |
| 16 | F21 | 27473 | CG14423        | 12.06050667 | 0.036736333 | 328.2991407 |
| 16 | F22 | 30293 | CG5213         | 8.345873667 | 0.032201    | 259.1805741 |
| 16 | F23 | 24074 | CG4946         | 11.56276    | 0.037679    | 306.8754479 |
| 16 | F24 | 30290 | CG4976         | 14.37524333 | 0.031771667 | 452.4548077 |
| 16 | G01 | 22648 | CG4439         | 12.42129333 | 0.050223333 | 247.3211655 |
| 16 | G02 | 22177 | CG1462         | 12.16927867 | 0.051028    | 238.4823757 |
| 16 | G03 | 22674 | CG3328         | 13.45338    | 0.042291667 | 318.1094778 |
| 16 | G04 | 22168 | CG1685         | 11.91267633 | 0.044001667 | 270.7323889 |
| 16 | G05 | 22651 | CG3350         | 8.935225667 | 0.047486667 | 188.1628317 |
| 16 | G06 | 22176 | CG1309         | 12.41945    | 0.050639    | 245.2546456 |
| 16 | G07 | 22654 | CG3505         | 12.65109667 | 0.039717    | 318.5310237 |
| 16 | G08 | 22203 | CG1619         | 10.50237333 | 0.044759667 | 234.6392213 |
| 16 | G09 | 22655 | CG3597         | 12.57447667 | 0.052271    | 240.5631548 |
| 16 | G10 | 22205 | CG1809         | 13.94850333 | 0.042123    | 331.1374625 |
| 16 | G11 | 22646 | CG4367         | 12.16545    | 0.039317333 | 309.4169662 |
| 16 | G12 | 20738 | CG15077        | 10.93342067 | 0.038135    | 286.7030462 |
| 16 | G13 | 22653 | CG3455         | 0.693448    | 0.017254333 | 40.18978807 |
| 16 | G14 | 20741 | CG15262        | 10.93487333 | 0.034998667 | 312.4368547 |
| 16 | G15 | 22647 | CG4406         | 10.62294333 | 0.051478    | 206.3588977 |
| 16 | G16 | 20742 | CG15302        | 13.61342333 | 0.034326333 | 396.5883335 |
| 16 | G17 | 22174 | CG1009         | 14.69767    | 0.032646    | 450.2135024 |
| 16 | G18 | 20736 | CG15014        | 14.19432333 | 0.034352333 | 413.1982301 |
| 16 | G19 | 22172 | CG8181         | 11.87994    | 0.033410333 | 355.5768176 |
| 16 | G20 | 20740 | CG15210        | 11.99681667 | 0.034992667 | 342.8380232 |
| 16 | G21 | 22175 | CG1112         | 13.22459667 | 0.035775333 | 369.6568399 |
| 16 | G22 | 20744 | CG14965        | 13.10783667 | 0.03248     | 403.5663998 |
| 16 | G23 | 22161 | CG8281         | 12.39226333 | 0.029639333 | 418.1019591 |
| 16 | G24 | 20755 | CG15358        | 11.109168   | 0.030642    | 362.5470922 |
| 16 | H01 | 20735 | CG16879        | 12.11682333 | 0.05361     | 226.0179693 |
| 16 | H02 | 25532 | CG14613        | 9.991646667 | 0.047874667 | 208.7042556 |
| 16 | H03 | 20734 | CG15454        | 10.45370633 | 0.045659667 | 228.9483716 |
| 16 | H04 | 25510 | CG14650        | 11.61198867 | 0.039762667 | 292.0324425 |
| 16 | H05 | 27446 | CG13408        | 12.30368    | 0.044096667 | 279.016101  |
| 16 | H06 | 30203 | CG4733         | 11.90988333 | 0.041015667 | 290.3740034 |
| 16 | H07 | 27443 | CG11607        | 9.856417    | 0.040480667 | 243.4845523 |
| 16 | H08 | 30208 | CG4204         | 4.359440667 | 0.040153333 | 108.5698323 |
| 16 | H09 | 27444 | CG12769        | 10.66791633 | 0.050073667 | 213.0444412 |
| 16 | H10 | 30210 | CG4371         | 11.95338    | 0.041952667 | 284.9253921 |
| 16 | H11 | 27438 | CG9013         | 13.13952667 | 0.038012333 | 345.6648281 |

|    |     |       |                        |             |             |             |
|----|-----|-------|------------------------|-------------|-------------|-------------|
| 16 | H12 | 30182 | CG4021                 | 11.76302    | 0.035985333 | 326.8837304 |
| 16 | H13 | 27425 | CG14352                | 14.84528667 | 0.034828    | 426.245741  |
| 16 | H14 | 30209 | CG4282                 | 9.445748    | 0.033832333 | 279.192922  |
| 16 | H15 | 27445 | CG13098                | 9.828336333 | 0.036243333 | 271.1763911 |
| 16 | H16 | 30190 | CG4656                 | 12.44103333 | 0.033865667 | 367.3641938 |
| 16 | H17 | 27447 | CG13749                | 12.16259    | 0.03572     | 340.4980403 |
| 16 | H18 | 30241 | CG3982                 | 10.47703533 | 0.032786667 | 319.551708  |
| 16 | H19 | 27440 | CG14959                | 10.363279   | 0.03266     | 317.3079914 |
| 16 | H20 | 30303 | CG5071                 | 12.6114     | 0.032967667 | 382.5384468 |
| 16 | H21 | 27441 | CG15225                | 9.195553667 | 0.035519667 | 258.8862602 |
| 16 | H22 | 30305 | CG5245                 | 11.53210367 | 0.028629333 | 402.8072723 |
| 16 | H23 | 24046 | CG4887                 | 11.50624633 | 0.030604333 | 375.9678804 |
| 16 | H24 | 30302 | CG4995                 | 13.96521667 | 0.027807    | 502.2194651 |
| 16 | I01 | 22660 | CG4446                 | 9.840638667 | 0.055157    | 178.4114195 |
| 16 | I02 | 22189 | CG1472                 | 11.437702   | 0.046492667 | 246.0108834 |
| 16 | I03 | 22664 | CG3422                 | 4.559691333 | 0.051014333 | 89.38059238 |
| 16 | I04 | 22180 | CG1693                 | 10.22102533 | 0.045498333 | 224.6461482 |
| 16 | I05 | 22663 | CG3355                 | 9.562615    | 0.046038667 | 207.7083394 |
| 16 | I06 | 22188 | CG1315,CG31286         | 10.46103633 | 0.048343333 | 216.390464  |
| 16 | I07 | 22666 | CG3511                 | 12.64405667 | 0.061548333 | 205.432966  |
| 16 | I08 | 22215 | CG1637                 | 11.52605333 | 0.048875667 | 235.8239615 |
| 16 | I09 | 22667 | CG3603                 | 12.69807067 | 0.047757333 | 265.8873471 |
| 16 | I10 | 20713 | CG15035                | 12.77686333 | 0.041581667 | 307.271554  |
| 16 | I11 | 22658 | CG4370                 | 12.151816   | 0.041748667 | 291.0707568 |
| 16 | I12 | 20750 | CG15088                | 11.85393933 | 0.038159    | 310.6459638 |
| 16 | I13 | 22668 | CG3655                 | 13.67029    | 0.047150667 | 289.92782   |
| 16 | I14 | 20753 | CG15269                | 11.31752    | 0.038231    | 296.0299234 |
| 16 | I15 | 22659 | CG4407                 | 13.75039667 | 0.043189    | 318.3772874 |
| 16 | I16 | 20754 | CG15304                | 9.690333333 | 0.038454333 | 251.9958739 |
| 16 | I17 | 22186 | CG1017                 | 3.894577667 | 0.042589333 | 91.44490796 |
| 16 | I18 | 20785 | CG15059                | 11.43807933 | 0.028527667 | 400.9468937 |
| 16 | I19 | 22184 | CG8187                 | 12.15317667 | 0.03396     | 357.867393  |
| 16 | I20 | 20703 | CG15119                | 14.14607667 | 0.036412    | 388.5004028 |
| 16 | I21 | 22187 | CG1120                 | 16.02592    | 0.032398    | 494.6576949 |
| 16 | I22 | 20756 | CG14971                | 12.02605667 | 0.037666667 | 319.2758407 |
| 16 | I23 | 22178 | CG7191                 | 13.19940333 | 0.036127    | 365.3611795 |
| 16 | I24 | 20767 | CG15373                | 11.55491    | 0.031403    | 367.9556093 |
| 16 | J01 | 20747 | CG16880                | 11.71674667 | 0.051251    | 228.6149864 |
| 16 | J02 | 25540 | CG13746,CG13751,CG8261 | 10.44219533 | 0.055550333 | 187.9771859 |
| 16 | J03 | 20746 | CG15456                | 12.0038     | 0.048200333 | 249.0397715 |
| 16 | J04 | 25523 | CG31361                | 12.46373667 | 0.062300667 | 200.0578378 |
| 16 | J05 | 27458 | CG13419                | 12.451067   | 0.049967333 | 249.1841403 |
| 16 | J06 | 30215 | CG4744                 | 11.31058    | 0.052333667 | 216.1243559 |
| 16 | J07 | 27455 | CG11769                | 9.96099     | 0.044970333 | 221.5013602 |
| 16 | J08 | 30220 | CG4205                 | 12.90834333 | 0.048470667 | 266.3124776 |
| 16 | J09 | 27456 | CG12802                | 11.83892767 | 0.050158667 | 236.0295529 |
| 16 | J10 | 30222 | CG4374                 | 12.83949333 | 0.045169    | 284.2545404 |
| 16 | J11 | 27450 | CG9266                 | 9.403316333 | 0.040232333 | 233.7253536 |
| 16 | J12 | 30194 | CG4029                 | 12.90592667 | 0.042659333 | 302.5346544 |
| 16 | J13 | 27454 | CG10337                | 12.96836333 | 0.035961667 | 360.6163044 |
| 16 | J14 | 30221 | CG4286                 | 11.30701667 | 0.041932333 | 269.6491172 |
| 16 | J15 | 27457 | CG13102                | 12.04240333 | 0.039254333 | 306.7789543 |
| 16 | J16 | 30224 | CG4608                 | 11.327022   | 0.040047    | 282.8432092 |
| 16 | J17 | 27472 | CG14128                | 13.64318667 | 0.037202667 | 366.7260411 |

|    |     |       |                |             |             |             |
|----|-----|-------|----------------|-------------|-------------|-------------|
| 16 | J18 | 30268 | CG5097         | 12.25282333 | 0.039013    | 314.0702672 |
| 16 | J19 | 27452 | CG15018        | 9.798853333 | 0.039564    | 247.6709467 |
| 16 | J20 | 30315 | CG5075         | 7.154957667 | 0.024719333 | 289.4478411 |
| 16 | J21 | 27497 | CG14543        | 5.559912    | 0.036985    | 150.328836  |
| 16 | J22 | 30316 | CG5137         | 12.86785667 | 0.039243333 | 327.8991761 |
| 16 | J23 | 24058 | CG4893         | 10.80598333 | 0.030635    | 352.7332572 |
| 16 | J24 | 30314 | CG5006         | 11.84345    | 0.036709    | 322.63069   |
| 16 | K02 | 22201 | CG1512         | 10.77703667 | 0.063552    | 169.5782456 |
| 16 | K03 | 22617 | CG3436         | 8.072805    | 0.051568667 | 156.5447688 |
| 16 | K04 | 22192 | CG18345        | 10.060906   | 0.052094    | 193.1298422 |
| 16 | K05 | 22675 | CG3360         | 9.800414667 | 0.046561333 | 210.4839781 |
| 16 | K06 | 22200 | CG1322         | 7.744291    | 0.052884333 | 146.4382835 |
| 16 | K07 | 22678 | CG3515         | 1.997782    | 0.063876667 | 31.27561447 |
| 16 | K08 | 22199 | CG1140         | 11.56439333 | 0.053580333 | 215.8327993 |
| 16 | K09 | 22679 | CG3609         | 9.178099    | 0.049674333 | 184.7654188 |
| 16 | K1  | 22672 | CG4452         | 9.351771333 | 0.03816     | 245.0673829 |
| 16 | K10 | 20725 | CG15040        | 9.660679667 | 0.03786     | 255.1685068 |
| 16 | K11 | 22686 | CG3329         | 0.66942     | 0.019935667 | 33.57901249 |
| 16 | K12 | 20762 | CG15093        | 10.98154567 | 0.042537    | 258.1645548 |
| 16 | K13 | 22680 | CG3656         | 9.380610667 | 0.041841333 | 224.1948313 |
| 16 | K14 | 20765 | CG15270        | 9.328286333 | 0.0451      | 206.8356171 |
| 16 | K15 | 22671 | CG4409         | 11.22929667 | 0.036936    | 304.0203776 |
| 16 | K16 | 20766 | CG15309        | 10.5404     | 0.039398333 | 267.5341597 |
| 16 | K17 | 22198 | CG1021         | 12.06878333 | 0.041527333 | 290.6226421 |
| 16 | K18 | 20760 | CG15029        | 10.33411333 | 0.03812     | 271.0942637 |
| 16 | K19 | 22196 | CG8191         | 11.13961667 | 0.038012    | 293.0552633 |
| 16 | K20 | 20715 | CG15133        | 8.699879    | 0.030106667 | 288.968523  |
| 16 | K21 | 22195 | CG8119         | 10.933151   | 0.035920667 | 304.3693788 |
| 16 | K22 | 20733 | CG15400        | 12.00722    | 0.034372333 | 349.3280448 |
| 16 | K23 | 22185 | CG8354         | 12.94509667 | 0.042704667 | 303.1307273 |
| 16 | K24 | 20751 | CG15152        | 10.66952267 | 0.038441    | 277.5558041 |
| 16 | L01 | 20769 | CG15408        | 12.32999333 | 0.074599667 | 165.2821505 |
| 16 | L02 | 25553 | CG13819        | 10.634753   | 0.052291    | 203.3763554 |
| 16 | L03 | 20745 | CG15403        | 11.74617333 | 0.053612333 | 219.0946113 |
| 16 | L04 | 25560 | CG14823        | 9.596974    | 0.064529    | 148.7234267 |
| 16 | L05 | 27470 | CG13484        | 9.431942    | 0.050309    | 187.4802123 |
| 16 | L06 | 30227 | CG4750         | 11.26137633 | 0.050332667 | 223.7389171 |
| 16 | L07 | 27403 | CG14624        | 9.459517667 | 0.044147    | 214.2731707 |
| 16 | L08 | 30232 | CG4213         | 10.18305    | 0.047776333 | 213.1400484 |
| 16 | L09 | 27475 | CG14879        | 11.44466667 | 0.048859667 | 234.2354635 |
| 16 | L10 | 30234 | CG4383         | 10.04087733 | 0.043542667 | 230.5985853 |
| 16 | L11 | 27462 | CG9376         | 12.233      | 0.04452     | 274.7753819 |
| 16 | L12 | 30231 | CG31657,CG4124 | 8.933532    | 0.041256667 | 216.5354771 |
| 16 | L13 | 27466 | CG10349        | 11.58954667 | 0.038837667 | 298.4099628 |
| 16 | L14 | 30233 | CG4287         | 6.315026667 | 0.037107333 | 170.1827132 |
| 16 | L15 | 27469 | CG13141        | 11.040279   | 0.037095667 | 297.6164062 |
| 16 | L16 | 30214 | CG4681         | 10.58699    | 0.043313667 | 244.4260857 |
| 16 | L17 | 27471 | CG13802        | 11.45468    | 0.043911    | 260.8612876 |
| 16 | L18 | 30280 | CG5098         | 10.5603     | 0.035208667 | 299.9346752 |
| 16 | L19 | 27464 | CG15019        | 11.53315    | 0.039165    | 294.4759351 |
| 16 | L20 | 30327 | CG5077         | 9.397850333 | 0.030721    | 305.9096492 |
| 16 | L21 | 24094 | CG4910,CG6972  | 11.37273167 | 0.036883    | 308.3461667 |
| 16 | L22 | 30277 | CG4898         | 11.49819    | 0.041684667 | 275.8373982 |
| 16 | L23 | 24070 | CG4896         | 10.85467667 | 0.037455333 | 289.8032323 |



|    |     |       |                 |             |             |             |
|----|-----|-------|-----------------|-------------|-------------|-------------|
| 16 | L24 | 30352 | CG5156          | 11.75615    | 0.039364333 | 298.649793  |
| 16 | M01 | 22662 | CG3327          | 12.01417667 | 0.057216667 | 209.9768715 |
| 16 | M02 | 22213 | CG1516          | 9.816148    | 0.056323333 | 174.2820856 |
| 16 | M03 | 22629 | CG3446          | 10.12092    | 0.053207    | 190.2178285 |
| 16 | M04 | 22204 | CG1709          | 14.31404333 | 0.044642667 | 320.6359387 |
| 16 | M05 | 22687 | CG3373          | 9.825458    | 0.050471    | 194.6753185 |
| 16 | M06 | 22212 | CG1371          | 10.21819    | 0.054800333 | 186.462187  |
| 16 | M07 | 22690 | CG3529          | 11.26469    | 0.046645667 | 241.494887  |
| 16 | M08 | 22211 | CG1210          | 8.979667667 | 0.045612333 | 196.8692897 |
| 16 | M09 | 22691 | CG3616          | 9.751192    | 0.058767333 | 165.9287813 |
| 16 | M10 | 20737 | CG15050         | 11.001686   | 0.050427667 | 218.1676593 |
| 16 | M11 | 22682 | CG4398          | 10.63866633 | 0.043226333 | 246.1154003 |
| 16 | M12 | 20774 | CG15113         | 10.97819267 | 0.043912667 | 250.0005921 |
| 16 | M13 | 22692 | CG3663          | 12.21135    | 0.047950333 | 254.6666342 |
| 16 | M14 | 20777 | CG15274         | 10.29664    | 0.048454667 | 212.5004815 |
| 16 | M15 | 22665 | CG3456          | 11.38855733 | 0.038096333 | 298.9410354 |
| 16 | M16 | 20778 | CG15319         | 1.391046333 | 0.104688    | 13.2875433  |
| 16 | M17 | 22210 | CG1059          | 5.188862    | 0.043046333 | 120.5413237 |
| 16 | M18 | 20787 | CG15198         | 9.320096333 | 0.037441667 | 248.923116  |
| 16 | M19 | 22194 | CG7335          | 10.984201   | 0.043213667 | 254.183499  |
| 16 | M20 | 20776 | CG15227         | 10.6274     | 0.037073    | 286.6614517 |
| 16 | M21 | 22218 | CG7344          | 11.82736667 | 0.040727667 | 290.4012833 |
| 16 | M22 | 20780 | CG14990,CG14995 | 11.83509333 | 0.042773333 | 276.6932668 |
| 16 | M23 | 22202 | CG7201          | 11.09582667 | 0.038791333 | 286.0388059 |
| 16 | M24 | 20763 | CG15161         | 11.71433    | 0.039957667 | 293.16852   |
| 16 | N01 | 20771 | CG16890         | 7.633988    | 0.051002333 | 149.6791911 |
| 16 | N02 | 25568 | CG14630,CG33082 | 7.022188333 | 0.045786333 | 153.3686544 |
| 16 | N03 | 20757 | CG15406         | 8.440063    | 0.050110667 | 168.4284716 |
| 16 | N04 | 25566 | CG14480,CG6501  | 8.319488333 | 0.047445667 | 175.347696  |
| 16 | N05 | 27482 | CG13499         | 8.1815      | 0.040289333 | 203.0686369 |
| 16 | N06 | 30242 | CG4067          | 1.205522667 | 0.030070333 | 40.09009988 |
| 16 | N07 | 27479 | CG32317         | 6.492125667 | 0.047652    | 136.2403607 |
| 16 | N08 | 30247 | CG4486          | 5.143283667 | 0.053104    | 96.85303681 |
| 16 | N09 | 27480 | CG12817         | 6.963180667 | 0.03968     | 175.4833837 |
| 16 | N10 | 30246 | CG4421          | 7.319856667 | 0.045961    | 159.2623456 |
| 16 | N11 | 27474 | CG32725,CG9650  | 7.427244333 | 0.043603333 | 170.336618  |
| 16 | N12 | 30218 | CG4058          | 7.927143667 | 0.040293333 | 196.735862  |
| 16 | N13 | 27478 | CG11207         | 6.119215667 | 0.036518    | 167.5671085 |
| 16 | N14 | 30200 | CG4527          | 8.580433667 | 0.041964    | 204.4713008 |
| 16 | N15 | 27481 | CG13218         | 8.602817667 | 0.034837333 | 246.9424851 |
| 16 | N16 | 30226 | CG4691          | 9.394341667 | 0.034507333 | 272.2418906 |
| 16 | N17 | 27483 | CG13807         | 7.688682667 | 0.036175667 | 212.5374147 |
| 16 | N18 | 30349 | CG4952          | 10.37112767 | 0.034165333 | 303.5570461 |
| 16 | N19 | 27449 | CG14420         | 10.02223767 | 0.033474667 | 299.3976838 |
| 16 | N20 | 30339 | CG5079          | 9.435968333 | 0.034145333 | 276.3472314 |
| 16 | N21 | 24106 | CG4922          | 10.651007   | 0.04491     | 237.1633712 |
| 16 | N22 | 30340 | CG5155          | 12.22956333 | 0.041593    | 294.0293639 |
| 16 | N23 | 24130 | CG4925          | 11.366202   | 0.032498    | 349.7508154 |
| 16 | N24 | 30338 | CG5016          | 11.59545333 | 0.037518    | 309.0637383 |
| 16 | O01 | 22696 | CG4464          | 1.083491333 | 0.062796    | 17.2541457  |
| 16 | O02 | 22225 | CG1518          | 9.083083    | 0.059609667 | 152.3760072 |
| 16 | O03 | 22700 | CG3434          | 10.346514   | 0.060155    | 171.9975729 |
| 16 | O04 | 22216 | CG1716          | 7.792242    | 0.057486333 | 135.5494697 |
| 16 | O05 | 22699 | CG3380          | 9.538374333 | 0.053693    | 177.6465151 |

|    |     |       |                 |             |             |             |
|----|-----|-------|-----------------|-------------|-------------|-------------|
| 16 | O06 | 22224 | CG1387          | 7.650667    | 0.062094333 | 123.2103896 |
| 16 | O07 | 22702 | CG3534          | 9.242364333 | 0.052803    | 175.0348339 |
| 16 | O08 | 22223 | CG1234          | 3.755346667 | 0.047421667 | 79.19052472 |
| 16 | O09 | 22703 | CG3625          | 8.936072667 | 0.049573    | 180.2608813 |
| 16 | O10 | 20761 | CG15056         | 8.176849667 | 0.048829333 | 167.4577372 |
| 16 | O11 | 22694 | CG4400          | 3.773468667 | 0.038954    | 96.8698636  |
| 16 | O12 | 20786 | CG15116         | 10.98611333 | 0.049666333 | 221.1983973 |
| 16 | O13 | 22704 | CG3665          | 11.29123    | 0.051895333 | 217.5769819 |
| 16 | O14 | 20789 | CG15286         | 9.811615    | 0.053455333 | 183.5479154 |
| 16 | O15 | 22695 | CG4420          | 9.521814    | 0.055882333 | 170.3904156 |
| 16 | O16 | 20790 | CG15324         | 10.40974967 | 0.040471333 | 257.2129161 |
| 16 | O17 | 22222 | CG1088          | 3.539657333 | 0.025616    | 138.1815011 |
| 16 | O18 | 20784 | CG15031         | 8.427871667 | 0.048216667 | 174.7916695 |
| 16 | O19 | 22206 | CG7341          | 11.118513   | 0.051533333 | 215.7538098 |
| 16 | O20 | 20788 | CG15253         | 11.24880333 | 0.043236667 | 260.1681443 |
| 16 | O21 |       | wt              | 53.72390333 | 0.038104    | 1409.928179 |
| 16 | O22 |       | HFA17794        | 1.365235333 | 0.013093333 | 104.269501  |
| 16 | O23 |       | hpo             | 37.73954    | 0.040742667 | 926.2903754 |
| 16 | O24 |       | Luc             | 1.878796    | 0.048521    | 38.72129593 |
| 16 | P01 | 20783 | CG16894         | 10.281372   | 0.073834333 | 139.249202  |
| 16 | P02 | 25577 | CG13830         | 9.690171    | 0.064207    | 150.9207875 |
| 16 | P03 | 20782 | CG15461         | 10.052779   | 0.06065     | 165.7506843 |
| 16 | P04 | 25558 | CG14701,CG17184 | 11.89827867 | 0.058797667 | 202.3597082 |
| 16 | P05 | 27494 | CG13530         | 7.795570333 | 0.058066333 | 134.252843  |
| 16 | P06 | 30249 | CG3937          | 5.756561667 | 0.073085667 | 78.76457764 |
| 16 | P07 | 27491 | CG12343         | 10.97633    | 0.074719    | 146.9014575 |
| 16 | P08 | 30256 | CG4231          | 9.669243333 | 0.054263333 | 178.1911051 |
| 16 | P09 | 27492 | CG12868         | 9.534732333 | 0.051218    | 186.1597941 |
| 16 | P10 | 30258 | CG4423          | 9.801827    | 0.090227    | 108.6351868 |
| 16 | P11 | 27448 | CG14075         | 9.666786    | 0.047592333 | 203.1164543 |
| 16 | P12 | 30230 | CG4060          | 0.895795667 | 0.030939667 | 28.95298376 |
| 16 | P13 | 27490 | CG11300         | 10.834706   | 0.056951    | 190.2461063 |
| 16 | P14 | 30257 | CG4299          | 11.12331933 | 0.043604333 | 255.0966494 |
| 16 | P15 | 27437 | CG14419         | 10.80794867 | 0.055311333 | 195.4020635 |
| 16 | P16 | 30252 | CG4842          | 10.61610467 | 0.047962667 | 221.3410013 |
| 16 | P17 | 27495 | CG32477         | 10.06757567 | 0.040924333 | 246.0046346 |
| 16 | P18 | 30350 | CG5023          | 10.055721   | 0.040845333 | 246.1902053 |
| 16 | P19 | 27488 | CG15120         | 10.36063633 | 0.046300667 | 223.768621  |
| 16 | P20 | 30351 | CG5085          | 8.139792667 | 0.045552    | 178.6923223 |
| 16 | P21 |       | wt              | 49.22619667 | 0.032043667 | 1536.222342 |
| 16 | P22 |       | HFA17794        | 1.189842667 | 0.010907333 | 109.0864862 |
| 16 | P23 |       | hpo             | 37.36845    | 0.039773333 | 939.5352833 |
| 16 | P24 |       | Luc             | 1.488739333 | 0.043994667 | 33.83908656 |
| 17 | A01 |       | DIAP1           | 0.371771333 | 0.008387333 | 44.32533185 |
| 17 | A02 |       | ex/ft           | 35.94195667 | 0.035328    | 1017.378755 |
| 17 | A03 |       | Luc             | 1.890564    | 0.039222    | 48.20162154 |
| 17 | A04 |       | hpo             | 37.44575    | 0.036622333 | 1022.484003 |
| 17 | A05 | 30270 | CG5289          | 0.753618667 | 0.014949667 | 50.41039934 |
| 17 | A06 | 29884 | CG32095         | 10.10972133 | 0.041687333 | 242.5130255 |
| 17 | A07 | 30069 | CG32442         | 13.62345667 | 0.041500667 | 328.2707908 |
| 17 | A08 | 29885 | CG32109         | 11.22272333 | 0.040190333 | 279.2393693 |
| 17 | A09 | 30073 | CG32458         | 12.80508333 | 0.048746667 | 262.6863375 |
| 17 | A10 | 29887 | CG32141         | 10.219571   | 0.042670667 | 239.4987423 |
| 17 | A11 | 30074 | CG32487         | 11.38926533 | 0.043496    | 261.8462694 |

|    |     |       |                |             |             |             |
|----|-----|-------|----------------|-------------|-------------|-------------|
| 17 | A12 | 29878 | CG32181        | 10.59550433 | 0.049154667 | 215.5543929 |
| 17 | A13 | 30075 | CG3270         | 12.33070333 | 0.037995    | 324.5348949 |
| 17 | A14 | 29879 | CG32193        | 10.826577   | 0.038661333 | 280.0363067 |
| 17 | A15 | 30089 | CG3379         | 15.48218    | 0.036209333 | 427.5742902 |
| 17 | A16 | 29886 | CG32119        | 12.65091667 | 0.042433333 | 298.1362922 |
| 17 | A17 | 30090 | CG3423         | 14.98933667 | 0.036182333 | 414.2722507 |
| 17 | A18 | 23760 | CG9970         | 11.48301    | 0.035549667 | 323.0131553 |
| 17 | A19 | 29881 | CG32039        | 10.177903   | 0.035408667 | 287.4410126 |
| 17 | A20 | 23764 | CG10000        | 12.9548     | 0.037369    | 346.6723755 |
| 17 | A21 | 29877 | CG32013        | 12.35746    | 0.037476    | 329.7433024 |
| 17 | A22 | 23769 | CG1503         | 12.1774     | 0.033369    | 364.9315233 |
| 17 | A23 | 29882 | CG32060        | 11.39476    | 0.036820333 | 309.4692244 |
| 17 | A24 | 23770 | CG1647         | 11.00028667 | 0.032506333 | 338.4044135 |
| 17 | B01 |       | DIAP1          | 0.43295     | 0.010291667 | 42.06801619 |
| 17 | B02 |       | ex/ft          | 46.45918    | 0.050221667 | 925.0824014 |
| 17 | B03 |       | Luc            | 1.974914    | 0.053159667 | 37.15060917 |
| 17 | B04 |       | hpo            | 38.81650667 | 0.051886    | 748.1113724 |
| 17 | B05 | 20611 | CG8586         | 13.262058   | 0.056065    | 236.5478998 |
| 17 | B06 | 18134 | CG6611         | 12.81976667 | 0.047148667 | 271.9009375 |
| 17 | B07 | 20600 | CG8277         | 15.642209   | 0.052651    | 297.0923439 |
| 17 | B08 | 18130 | CG7906         | 11.95550667 | 0.044578333 | 268.1909747 |
| 17 | B09 | 20604 | CG8314         | 12.37335    | 0.049036    | 252.3319602 |
| 17 | B10 | 18131 | CG7987         | 12.13890767 | 0.048115333 | 252.2877184 |
| 17 | B11 | 20605 | CG18255,CG8366 | 11.022964   | 0.046761    | 235.7298604 |
| 17 | B12 | 18135 | CG6686         | 7.463140667 | 0.039822333 | 187.4109336 |
| 17 | B13 | 20608 | CG8470         | 12.69586667 | 0.046124333 | 275.2531202 |
| 17 | B14 | 18138 | CG7616         | 13.22120333 | 0.040730667 | 324.6007104 |
| 17 | B15 | 20610 | CG8564         | 13.55294667 | 0.036627667 | 370.0193843 |
| 17 | B16 | 18139 | CG7705         | 12.08445667 | 0.038308667 | 315.4496807 |
| 17 | B17 | 20606 | CG8411         | 11.22203667 | 0.040012333 | 280.4644401 |
| 17 | B18 | 18140 | CG7816         | 12.94006667 | 0.041286333 | 313.4225208 |
| 17 | B19 | 20607 | CG8440         | 13.78836    | 0.037172333 | 370.9307101 |
| 17 | B20 | 18157 | CG6542         | 9.746502667 | 0.035207    | 276.834228  |
| 17 | B21 | 20627 | CG14934        | 12.03946    | 0.037685333 | 319.4733583 |
| 17 | B22 | 25298 | CG15894        | 10.96837333 | 0.041576667 | 263.8107913 |
| 17 | B23 | 18133 | CG6476         | 1.404599    | 0.026158    | 53.69672758 |
| 17 | B24 | 25297 | CG15860        | 14.07560667 | 0.033193    | 424.0534651 |
| 17 | C01 | 30275 | CG5556         | 11.289686   | 0.036554    | 308.8495377 |
| 17 | C02 | 29892 | CG32204        | 10.770563   | 0.036769667 | 292.919789  |
| 17 | C03 | 30283 | CG5421         | 12.26076433 | 0.036319667 | 337.5792087 |
| 17 | C04 | 29888 | CG32163        | 16.15781333 | 0.052152667 | 309.8175868 |
| 17 | C05 | 30282 | CG5361         | 15.27618333 | 0.047144667 | 324.0278151 |
| 17 | C06 | 29896 | CG32098        | 11.78239467 | 0.034858    | 338.0112074 |
| 17 | C07 | 30081 | CG32445        | 13.65844    | 0.052829    | 258.5405743 |
| 17 | C08 | 29897 | CG32110        | 16.79880667 | 0.041202333 | 407.7149352 |
| 17 | C09 | 30084 | CG3818         | 15.88305333 | 0.046514    | 341.4682318 |
| 17 | C10 | 29899 | CG32143        | 12.06776667 | 0.037772333 | 319.4869261 |
| 17 | C11 | 30120 | CG3838         | 13.48664333 | 0.038028667 | 354.6441281 |
| 17 | C12 | 29890 | CG32182        | 13.27997333 | 0.034386    | 386.202912  |
| 17 | C13 | 30087 | CG3271         | 16.03604    | 0.041028667 | 390.8496498 |
| 17 | C14 | 29891 | CG32194        | 14.11151    | 0.034765667 | 405.9036214 |
| 17 | C15 | 30101 | CG3396         | 16.43281    | 0.038122    | 431.0584439 |
| 17 | C16 | 29898 | CG32120        | 13.91946    | 0.041377333 | 336.4030226 |
| 17 | C17 | 30124 | CG3348         | 14.02856333 | 0.038131667 | 367.8979851 |

|    |     |       |                 |             |             |             |
|----|-----|-------|-----------------|-------------|-------------|-------------|
| 17 | C18 | 23772 | CG9978          | 13.83777333 | 0.034567667 | 400.3097307 |
| 17 | C19 | 29893 | CG32040         | 15.57553    | 0.034436667 | 452.2949376 |
| 17 | C20 | 23776 | CG10001         | 15.00621667 | 0.038683333 | 387.9246015 |
| 17 | C21 | 29889 | CG32017         | 15.85831    | 0.030660333 | 517.2256227 |
| 17 | C22 | 23777 | CG1091          | 20.25127    | 0.036737    | 551.249966  |
| 17 | C23 | 29894 | CG32061         | 14.52187667 | 0.033643333 | 431.6420291 |
| 17 | C24 | 23768 | CG1374          | 15.67780667 | 0.027535333 | 569.3705058 |
| 17 | D01 | 23774 | CG3048          | 17.50217333 | 0.065605667 | 266.7783779 |
| 17 | D02 | 18132 | CG1847          | 14.61107333 | 0.050433333 | 289.7106411 |
| 17 | D03 | 23775 | CG3135          | 17.57942667 | 0.048727333 | 360.7713672 |
| 17 | D04 | 18137 | CG7470          | 13.67063667 | 0.051507667 | 265.4097448 |
| 17 | D05 | 20623 | CG8587          | 15.49702333 | 0.048274    | 321.0221513 |
| 17 | D06 | 18146 | CG6621          | 14.82866333 | 0.045447    | 326.2847566 |
| 17 | D07 | 20612 | CG8279          | 17.66690333 | 0.048510333 | 364.1884547 |
| 17 | D08 | 18142 | CG7920          | 10.042107   | 0.043036    | 233.342016  |
| 17 | D09 | 20616 | CG8316          | 16.07528333 | 0.04402     | 365.181357  |
| 17 | D10 | 18143 | CG8003          | 15.21865667 | 0.046510667 | 327.2078806 |
| 17 | D11 | 20617 | CG8367          | 4.198709333 | 0.040137667 | 104.6077085 |
| 17 | D12 | 18147 | CG6701          | 14.86752333 | 0.038917    | 382.0315886 |
| 17 | D13 | 20602 | CG8654          | 16.71853667 | 0.047276    | 353.63687   |
| 17 | D14 | 18150 | CG7623          | 14.67793333 | 0.032341667 | 453.839732  |
| 17 | D15 | 20638 | CG8678          | 15.29577    | 0.03952     | 387.0387146 |
| 17 | D16 | 18151 | CG7727          | 16.2472     | 0.031869    | 509.8120431 |
| 17 | D17 | 20621 | CG8520          | 17.5152     | 0.033651    | 520.4956762 |
| 17 | D18 | 18152 | CG7818          | 17.41394667 | 0.034285    | 507.9173594 |
| 17 | D19 | 20619 | CG8441          | 17.02922333 | 0.032254667 | 527.9615353 |
| 17 | D20 | 18169 | CG6549          | 12.59656333 | 0.039440333 | 319.3827807 |
| 17 | D21 | 20639 | CG14936         | 15.81906333 | 0.033854333 | 467.2684934 |
| 17 | D22 | 25310 | CG15896,CG32918 | 18.18446    | 0.032208667 | 564.5828245 |
| 17 | D23 | 18145 | CG6495          | 13.78661    | 0.039067    | 352.8965623 |
| 17 | D24 | 25309 | CG15861         | 14.67731333 | 0.037281333 | 393.6906763 |
| 17 | E01 | 30287 | CG5557          | 21.47300333 | 0.047319333 | 453.7892193 |
| 17 | E02 | 29904 | CG32207         | 20.92545333 | 0.040813333 | 512.7112055 |
| 17 | E03 | 30295 | CG33102         | 24.90425333 | 0.042852    | 581.1689847 |
| 17 | E04 | 29900 | CG32167         | 19.81582667 | 0.041417    | 478.4466926 |
| 17 | E05 | 30294 | CG5373          | 25.06218667 | 0.047091    | 532.2075697 |
| 17 | E06 | 29908 | CG32099         | 17.29550333 | 0.039110333 | 442.2233681 |
| 17 | E07 | 30093 | CG32446         | 21.89633667 | 0.035116333 | 623.5371005 |
| 17 | E08 | 29909 | CG32111         | 23.8594     | 0.045429667 | 525.1942563 |
| 17 | E09 | 30097 | CG32461         | 24.94228667 | 0.048719667 | 511.9551995 |
| 17 | E10 | 29911 | CG32147         | 23.38299    | 0.033279667 | 702.6209197 |
| 17 | E11 | 30160 | CG3361          | 16.14548333 | 0.042188667 | 382.6971699 |
| 17 | E12 | 29902 | CG32184         | 19.92185333 | 0.036238667 | 549.7402406 |
| 17 | E13 | 30115 | CG3501          | 15.56176333 | 0.038982667 | 399.1969935 |
| 17 | E14 | 29903 | CG32195         | 18.41760667 | 0.034491667 | 533.9726504 |
| 17 | E15 | 30113 | CG3397          | 23.32864667 | 0.029585    | 788.5295476 |
| 17 | E16 | 29910 | CG32121         | 19.46858333 | 0.033308333 | 584.4958719 |
| 17 | E17 | 30114 | CG3430          | 19.98284    | 0.036771    | 543.440211  |
| 17 | E18 | 23784 | CG9987          | 19.24515    | 0.033818    | 569.0800757 |
| 17 | E19 | 29905 | CG32044         | 18.47311    | 0.033682667 | 548.4455902 |
| 17 | E20 | 23788 | CG10002         | 15.41749333 | 0.035484667 | 434.483251  |
| 17 | E21 | 29901 | CG32022         | 17.63589333 | 0.03415     | 516.4244021 |
| 17 | E22 | 23789 | CG1092          | 18.87553667 | 0.027958333 | 675.1309687 |
| 17 | E23 | 29906 | CG32064         | 20.27777333 | 0.031113    | 651.7460011 |

|    |     |       |               |             |             |             |
|----|-----|-------|---------------|-------------|-------------|-------------|
| 17 | E24 | 23794 | CG1652        | 23.76617667 | 0.033593    | 707.4740769 |
| 17 | F01 | 23786 | CG3054        | 21.38914    | 0.048225333 | 443.52498   |
| 17 | F02 | 18144 | CG1869        | 16.91596    | 0.046889    | 360.7660645 |
| 17 | F03 | 23845 | CG2986,CG3104 | 2.93279     | 0.037144333 | 78.95659275 |
| 17 | F04 | 18160 | CG6766        | 16.23023333 | 0.048098    | 337.4409192 |
| 17 | F05 | 20635 | CG8593        | 17.30516333 | 0.045867667 | 377.2845796 |
| 17 | F06 | 18158 | CG6647        | 17.12049667 | 0.044815667 | 382.02035   |
| 17 | F07 | 20624 | CG8286        | 15.17829333 | 0.045206667 | 335.7534287 |
| 17 | F08 | 18154 | CG7927        | 15.10464667 | 0.048188667 | 313.4481137 |
| 17 | F09 | 20628 | CG8322        | 20.08785    | 0.042381667 | 473.9749892 |
| 17 | F10 | 18155 | CG8019        | 21.78462667 | 0.040631    | 536.1577777 |
| 17 | F11 | 20629 | CG8370        | 25.04867333 | 0.041937667 | 597.2834286 |
| 17 | F12 | 18159 | CG6704        | 17.68016    | 0.035651    | 495.923256  |
| 17 | F13 | 20632 | CG8481,CG9473 | 19.0322     | 0.041487667 | 458.7435623 |
| 17 | F14 | 18162 | CG7626        | 10.40868333 | 0.023157    | 449.4832376 |
| 17 | F15 | 20634 | CG8569        | 17.48695667 | 0.031264    | 559.3320326 |
| 17 | F16 | 18163 | CG7742        | 16.76515    | 0.041235667 | 406.5691513 |
| 17 | F17 | 20633 | CG8526        | 19.47128333 | 0.034653333 | 561.8877453 |
| 17 | F18 | 18216 | CG1903        | 17.10691333 | 0.032330667 | 529.1234329 |
| 17 | F19 | 20669 | CG8544        | 16.82201333 | 0.024636    | 682.8224279 |
| 17 | F20 | 18181 | CG6582        | 12.94290333 | 0.035456    | 365.0412718 |
| 17 | F21 | 20651 | CG14939       | 14.86687667 | 0.037408667 | 397.417978  |
| 17 | F22 | 25293 | CG15769       | 19.09449333 | 0.032262667 | 591.8448568 |
| 17 | F23 | 18129 | CG6382        | 17.74788667 | 0.033664667 | 527.1962691 |
| 17 | F24 | 25321 | CG15865       | 17.52161    | 0.028986333 | 604.4783174 |
| 17 | G01 | 30299 | CG5559        | 18.31681667 | 0.039216667 | 467.0671483 |
| 17 | G02 | 29916 | CG32215       | 19.22792333 | 0.036988333 | 519.8375163 |
| 17 | G03 | 30286 | CG5502        | 2.327101667 | 0.036442667 | 63.85651434 |
| 17 | G04 | 29912 | CG32168       | 14.33862    | 0.053685    | 267.0880134 |
| 17 | G05 | 30264 | CG5589        | 11.250457   | 0.050134333 | 224.4062352 |
| 17 | G06 | 29920 | CG32101       | 16.49902    | 0.041384667 | 398.6747104 |
| 17 | G07 | 30105 | CG32448       | 21.69931333 | 0.039460667 | 549.8972817 |
| 17 | G08 | 29921 | CG32114       | 19.9131     | 0.039533333 | 503.7040472 |
| 17 | G09 | 30109 | CG32467       | 20.55162    | 0.033074667 | 621.3704346 |
| 17 | G10 | 29923 | CG32148       | 16.88002333 | 0.040371    | 418.1224972 |
| 17 | G11 | 30110 | CG3264        | 20.02961333 | 0.035811333 | 559.3093434 |
| 17 | G12 | 29914 | CG32185       | 20.50303333 | 0.037626667 | 544.9069809 |
| 17 | G13 | 30111 | CG3274        | 7.352390667 | 0.040726667 | 180.5301359 |
| 17 | G14 | 29915 | CG32196       | 18.98009333 | 0.038938    | 487.4439708 |
| 17 | G15 | 30125 | CG3401        | 18.21637    | 0.033607    | 542.0409439 |
| 17 | G16 | 29972 | CG32178       | 20.20921333 | 0.038511    | 524.7646993 |
| 17 | G17 | 30148 | CG3358        | 21.09955    | 0.035765333 | 589.9441731 |
| 17 | G18 | 23796 | CG9988        | 17.93068333 | 0.033869    | 529.4128357 |
| 17 | G19 | 29917 | CG32047       | 18.84779667 | 0.038112333 | 494.5327409 |
| 17 | G20 | 23800 | CG1048        | 15.39025667 | 0.029283    | 525.5696707 |
| 17 | G21 | 29913 | CG32024       | 20.06025    | 0.035309667 | 568.1234601 |
| 17 | G22 | 23851 | CG1343        | 19.64379333 | 0.037839333 | 519.136877  |
| 17 | G23 | 29918 | CG32065       | 19.01535333 | 0.036026667 | 527.8132865 |
| 17 | G24 | 23826 | CG1155        | 19.28813333 | 0.028332333 | 680.7816746 |
| 17 | H01 | 23833 | CG2972        | 11.42733267 | 0.052254667 | 218.6853997 |
| 17 | H02 | 18156 | CG1882        | 6.732162    | 0.045303    | 148.6030064 |
| 17 | H03 | 20613 | CG8625        | 61.07932    | 0.048537    | 1258.407401 |
| 17 | H04 | 18161 | CG7529        | 17.60647333 | 0.045031    | 390.9856173 |
| 17 | H05 | 20647 | CG8594        | 16.31780667 | 0.049500667 | 329.6482202 |

|    |     |       |               |             |             |             |
|----|-----|-------|---------------|-------------|-------------|-------------|
| 17 | H06 | 18170 | CG6659        | 14.58945    | 0.037141667 | 392.8054745 |
| 17 | H07 | 20636 | CG8291        | 15.74559333 | 0.047803    | 329.3850456 |
| 17 | H08 | 18166 | CG32316       | 15.81589667 | 0.048131667 | 328.5964888 |
| 17 | H09 | 20640 | CG8323        | 17.76079    | 0.037638667 | 471.8761734 |
| 17 | H10 | 18167 | CG8024        | 16.22323667 | 0.041818    | 387.9486505 |
| 17 | H11 | 20641 | CG8380        | 19.25631667 | 0.035648    | 540.1794397 |
| 17 | H12 | 18171 | CG6706        | 13.98154    | 0.040666667 | 343.8083607 |
| 17 | H13 | 20644 | CG8486        | 17.00280333 | 0.041014333 | 414.5575937 |
| 17 | H14 | 18174 | CG7639        | 19.49329333 | 0.034625667 | 562.9723615 |
| 17 | H15 | 20646 | CG8573        | 13.63155333 | 0.036229    | 376.2608224 |
| 17 | H16 | 18175 | CG7747        | 15.14498333 | 0.033183333 | 456.4033149 |
| 17 | H17 | 20642 | CG8422        | 16.90766667 | 0.037854    | 446.6546908 |
| 17 | H18 | 18176 | CG7830        | 12.096115   | 0.035910667 | 336.8390543 |
| 17 | H19 | 20643 | CG8445        | 20.65886    | 0.032525    | 635.1686395 |
| 17 | H20 | 18193 | CG6597        | 16.15089    | 0.030465333 | 530.1399405 |
| 17 | H21 | 20663 | CG14940       | 17.56262667 | 0.032539667 | 539.7297657 |
| 17 | H22 | 25305 | CG15773       | 17.11401333 | 0.029981333 | 570.8222894 |
| 17 | H23 | 18201 | CG6451        | 19.17352667 | 0.029799667 | 643.4141321 |
| 17 | H24 | 25333 | CG15874       | 21.28076667 | 0.026873    | 791.9014128 |
| 17 | I01 | 30311 | CG5561        | 14.55292933 | 0.042576    | 341.8106288 |
| 17 | I02 | 29928 | CG32217       | 13.46780967 | 0.040700667 | 330.8989943 |
| 17 | I03 | 30319 | CG5450        | 15.84479333 | 0.041452667 | 382.2382155 |
| 17 | I04 | 29967 | CG32094       | 13.10466867 | 0.042632667 | 307.3856198 |
| 17 | I05 | 30318 | CG5393        | 10.58545767 | 0.039685667 | 266.7325147 |
| 17 | I06 | 29932 | CG32102       | 12.736661   | 0.042782667 | 297.7061037 |
| 17 | I07 | 30117 | CG32450       | 15.04841    | 0.046248333 | 325.3827525 |
| 17 | I08 | 29933 | CG32115       | 13.30108    | 0.043884    | 303.0963449 |
| 17 | I09 | 30121 | CG32468       | 16.11294333 | 0.040345    | 399.37894   |
| 17 | I10 | 29935 | CG32151       | 13.63149    | 0.035023    | 389.2153728 |
| 17 | I11 | 30122 | CG3265        | 19.05322333 | 0.049422    | 385.5210905 |
| 17 | I12 | 29926 | CG32186       | 16.15094    | 0.037798    | 427.2961532 |
| 17 | I13 | 30139 | CG3528        | 16.83551    | 0.043167333 | 390.0057914 |
| 17 | I14 | 29927 | CG32198       | 16.89982333 | 0.042407333 | 398.511814  |
| 17 | I15 | 30137 | CG3403        | 8.124403333 | 0.039051333 | 208.0441982 |
| 17 | I16 | 29934 | CG32132       | 14.78495667 | 0.033773667 | 437.7658136 |
| 17 | I17 | 29883 | CG32077       | 15.01794    | 0.044024333 | 341.128164  |
| 17 | I18 | 23849 | CG1136        | 16.65562667 | 0.035591667 | 467.9642238 |
| 17 | I19 | 29929 | CG32050       | 14.78150667 | 0.030487    | 484.8462186 |
| 17 | I20 | 23790 | CG1143        | 15.1644     | 0.039996667 | 379.1415951 |
| 17 | I21 | 29925 | CG32026       | 16.20591333 | 0.033181667 | 488.3996183 |
| 17 | I22 | 23813 | CG1103,CG9772 | 13.47176333 | 0.035383    | 380.741128  |
| 17 | I23 | 29930 | CG32069       | 13.99563    | 0.03528     | 396.7015306 |
| 17 | I24 | 23838 | CG1157        | 18.67197333 | 0.032574    | 573.2170852 |
| 17 | J01 | 23810 | CG3075        | 12.37771667 | 0.048563333 | 254.8778228 |
| 17 | J02 | 18168 | CG1883        | 1.975619    | 0.045208    | 43.70065033 |
| 17 | J03 | 20625 | CG8631        | 13.48575667 | 0.049618    | 271.7916213 |
| 17 | J04 | 18173 | CG7530        | 9.696406667 | 0.046820667 | 207.0967237 |
| 17 | J05 | 20659 | CG8596        | 15.66731    | 0.051764667 | 302.6641725 |
| 17 | J06 | 18182 | CG6662        | 13.19572    | 0.044674    | 295.3780723 |
| 17 | J07 | 20648 | CG8301        | 17.80624    | 0.048568333 | 366.622422  |
| 17 | J08 | 18178 | CG7957        | 5.818055    | 0.031314667 | 185.7932917 |
| 17 | J09 | 20652 | CG8326        | 12.3451     | 0.044031    | 280.3729191 |
| 17 | J10 | 18179 | CG8036        | 15.30173667 | 0.046197667 | 331.2231498 |
| 17 | J11 | 20653 | CG8388        | 14.71816    | 0.045838667 | 321.0861282 |

|    |     |       |         |             |             |             |
|----|-----|-------|---------|-------------|-------------|-------------|
| 17 | J12 | 18183 | CG6711  | 6.353434    | 0.035687667 | 178.0288428 |
| 17 | J13 | 20656 | CG8491  | 4.459538667 | 0.048706333 | 91.55972871 |
| 17 | J14 | 18186 | CG31314 | 16.89644667 | 0.038108667 | 443.3754352 |
| 17 | J15 | 20658 | CG14767 | 22.64262667 | 0.041401    | 546.910139  |
| 17 | J16 | 18187 | CG7766  | 16.58072333 | 0.040209667 | 412.3566472 |
| 17 | J17 | 20654 | CG8428  | 17.73467667 | 0.037656    | 470.9654947 |
| 17 | J18 | 18188 | CG7832  | 15.08484667 | 0.038139333 | 395.5194113 |
| 17 | J19 | 20655 | CG8446  | 14.741088   | 0.034565333 | 426.4702978 |
| 17 | J20 | 18205 | CG6603  | 25.34500333 | 0.043834    | 578.2042098 |
| 17 | J21 | 20675 | CG14941 | 19.76990333 | 0.040564333 | 487.3715826 |
| 17 | J22 | 25317 | CG15786 | 15.42409333 | 0.036683667 | 420.4621494 |
| 17 | J23 | 18153 | CG6404  | 16.22675    | 0.034280667 | 473.349896  |
| 17 | J24 | 25345 | CG15879 | 16.94615667 | 0.036064    | 469.8912119 |
| 17 | K02 | 29940 | CG32219 | 14.86811    | 0.046928    | 316.8281197 |
| 17 | K03 | 30296 | CG5468  | 18.84237    | 0.048212    | 390.823239  |
| 17 | K04 | 29936 | CG32170 | 14.59558    | 0.044277667 | 329.6375148 |
| 17 | K05 | 30341 | CG33107 | 12.42917    | 0.047571    | 261.2761977 |
| 17 | K06 | 29944 | CG32106 | 16.79613667 | 0.047099667 | 356.6083978 |
| 17 | K07 | 30129 | CG32452 | 13.47209    | 0.044608    | 302.0106259 |
| 17 | K08 | 29945 | CG32116 | 12.72447833 | 0.042569667 | 298.909513  |
| 17 | K09 | 30133 | CG32476 | 13.83383667 | 0.053023667 | 260.899284  |
| 17 | K1  | 30332 | CG5476  | 15.131606   | 0.043398667 | 348.6652278 |
| 17 | K10 | 29947 | CG32152 | 15.03332333 | 0.0424      | 354.5595126 |
| 17 | K11 | 30134 | CG3267  | 16.15961667 | 0.045604333 | 354.3438854 |
| 17 | K12 | 29938 | CG32187 | 14.05180333 | 0.043413    | 323.6773163 |
| 17 | K13 | 30135 | CG3283  | 12.92103667 | 0.037008    | 349.1417171 |
| 17 | K14 | 29939 | CG33149 | 12.04372967 | 0.035571333 | 338.5796522 |
| 17 | K15 | 30149 | CG3409  | 12.87754    | 0.041291    | 311.8728052 |
| 17 | K16 | 29946 | CG32135 | 14.66164667 | 0.049136333 | 298.3870727 |
| 17 | K17 | 29895 | CG32079 | 11.689477   | 0.037657333 | 310.4170148 |
| 17 | K18 | 23820 | CG9993  | 11.71234333 | 0.041715333 | 280.7683026 |
| 17 | K19 | 29941 | CG32053 | 12.18403    | 0.035242333 | 345.7214335 |
| 17 | K20 | 23802 | CG1150  | 12.31648333 | 0.037778333 | 326.0197644 |
| 17 | K21 | 29937 | CG32027 | 13.32831    | 0.037607667 | 354.4040665 |
| 17 | K22 | 23852 | CG1501  | 13.41775    | 0.038476    | 348.7303774 |
| 17 | K23 | 29942 | CG32071 | 14.77841667 | 0.033785333 | 437.4210703 |
| 17 | K24 | 23816 | CG1429  | 15.36969333 | 0.034437667 | 446.3047245 |
| 17 | L01 | 23797 | CG2961  | 16.08681333 | 0.059774667 | 269.1242667 |
| 17 | L02 | 18180 | CG1886  | 3.508852333 | 0.046591667 | 75.31072796 |
| 17 | L03 | 20637 | CG8635  | 12.29377667 | 0.048160667 | 255.2659155 |
| 17 | L04 | 18185 | CG7533  | 12.21975767 | 0.044535333 | 274.3834334 |
| 17 | L05 | 20671 | CG8597  | 42.1717     | 0.055754667 | 756.379735  |
| 17 | L06 | 18194 | CG6664  | 8.590759    | 0.04195     | 204.7856734 |
| 17 | L07 | 20660 | CG8306  | 11.888963   | 0.045246    | 262.7627415 |
| 17 | L08 | 18190 | CG7977  | 0.991096    | 0.033992667 | 29.15617094 |
| 17 | L09 | 20664 | CG8334  | 12.76039333 | 0.044273    | 288.2206612 |
| 17 | L10 | 18191 | CG8042  | 10.64400833 | 0.043788667 | 243.0767855 |
| 17 | L11 | 20665 | CG8389  | 13.29678633 | 0.044685667 | 297.5626711 |
| 17 | L12 | 18195 | CG6718  | 11.82949    | 0.060632333 | 195.1020083 |
| 17 | L13 | 20668 | CG8492  | 13.13567333 | 0.042622333 | 308.1875699 |
| 17 | L14 | 18198 | CG7669  | 11.04639967 | 0.037186    | 297.0580236 |
| 17 | L15 | 20670 | CG32380 | 11.87998667 | 0.037072    | 320.4571285 |
| 17 | L16 | 18199 | CG7769  | 6.555760667 | 0.038478667 | 170.3739042 |
| 17 | L17 | 20666 | CG8430  | 14.10412333 | 0.040641667 | 347.0360468 |

|    |     |       |         |             |             |             |
|----|-----|-------|---------|-------------|-------------|-------------|
| 17 | L18 | 18200 | CG7875  | 12.57189667 | 0.037562333 | 334.6942416 |
| 17 | L19 | 20667 | CG8451  | 13.04748    | 0.045143333 | 289.0234069 |
| 17 | L20 | 18217 | CG6606  | 11.14722    | 0.036113    | 308.6761    |
| 17 | L21 | 20687 | CG14945 | 12.78246667 | 0.044799333 | 285.3271626 |
| 17 | L22 | 25329 | CG15800 | 14.68255333 | 0.037773    | 388.7049833 |
| 17 | L23 | 18213 | CG6455  | 16.81356333 | 0.03398     | 494.8076319 |
| 17 | L24 | 25357 | CG15880 | 17.96246667 | 0.034152333 | 525.9513747 |
| 17 | M01 | 30344 | CG5483  | 13.93974667 | 0.040046667 | 348.0875645 |
| 17 | M02 | 29931 | CG32088 | 17.4476     | 0.045176333 | 386.2110692 |
| 17 | M03 | 30308 | CG5471  | 15.11679333 | 0.042822333 | 353.0119019 |
| 17 | M04 | 29948 | CG32172 | 14.60429333 | 0.046283667 | 315.538815  |
| 17 | M05 | 30342 | CG5408  | 13.85841667 | 0.045640667 | 303.6418545 |
| 17 | M06 | 29956 | CG32107 | 14.96560667 | 0.049004333 | 305.3935366 |
| 17 | M07 | 30141 | CG32454 | 15.87708667 | 0.043886667 | 361.7747228 |
| 17 | M08 | 29957 | CG32117 | 17.61546    | 0.052261333 | 337.0648791 |
| 17 | M09 | 30145 | CG32483 | 18.3077     | 0.049707    | 368.3123101 |
| 17 | M10 | 29959 | CG32154 | 16.09647    | 0.03599     | 447.2484023 |
| 17 | M11 | 30146 | CG3268  | 10.79413633 | 0.047782    | 225.9038201 |
| 17 | M12 | 29950 | CG3219  | 13.94066667 | 0.041114667 | 339.0679725 |
| 17 | M13 | 30147 | CG3287  | 18.56429    | 0.041759667 | 444.5507228 |
| 17 | M14 | 29951 | CG32201 | 14.58469    | 0.04203     | 347.0066619 |
| 17 | M15 | 30155 | CG3790  | 17.26956333 | 0.036911333 | 467.8661477 |
| 17 | M16 | 29958 | CG32139 | 17.05283667 | 0.036791333 | 463.5014587 |
| 17 | M17 | 29907 | CG32080 | 13.59113    | 0.034718    | 391.472147  |
| 17 | M18 | 23766 | CG1137  | 13.74710333 | 0.039205667 | 350.6407237 |
| 17 | M19 | 29953 | CG32056 | 14.94866    | 0.036384667 | 410.8505414 |
| 17 | M20 | 23836 | CG1076  | 13.84868667 | 0.038956    | 355.4956019 |
| 17 | M21 | 29949 | CG32032 | 14.67025333 | 0.038096667 | 385.0797095 |
| 17 | M22 | 23841 | CG1625  | 16.36657667 | 0.033960333 | 481.9321561 |
| 17 | M23 | 29954 | CG32072 | 15.93116    | 0.031025    | 513.4942788 |
| 17 | M24 | 23828 | CG1464  | 15.31007    | 0.033853    | 452.2514991 |
| 17 | N01 | 23809 | CG2968  | 15.19689667 | 0.051111    | 297.3312333 |
| 17 | N02 | 18136 | CG6755  | 8.097651667 | 0.028048333 | 288.703488  |
| 17 | N03 | 20649 | CG8636  | 2.434592    | 0.051343667 | 47.41757179 |
| 17 | N04 | 18197 | CG7546  | 16.14394    | 0.04839     | 333.6214094 |
| 17 | N05 | 20683 | CG8613  | 15.54060333 | 0.053451333 | 290.7430435 |
| 17 | N06 | 18206 | CG6671  | 2.241997333 | 0.040644333 | 55.16137551 |
| 17 | N07 | 20672 | CG8309  | 5.761434667 | 0.045516333 | 126.5794989 |
| 17 | N08 | 18202 | CG7981  | 14.36326667 | 0.042859    | 335.1283667 |
| 17 | N09 | 20676 | CG8340  | 17.57648    | 0.041232333 | 426.2790528 |
| 17 | N10 | 18203 | CG18659 | 15.03812    | 0.040683667 | 369.6353164 |
| 17 | N11 | 20677 | CG8392  | 2.290424    | 0.015112    | 151.563261  |
| 17 | N12 | 18207 | CG6744  | 14.06888667 | 0.042915333 | 327.8289034 |
| 17 | N13 | 20680 | CG8495  | 1.642459333 | 0.034573    | 47.50699486 |
| 17 | N14 | 18210 | CG18617 | 10.50359967 | 0.029617    | 354.6476573 |
| 17 | N15 | 20682 | CG8580  | 19.85143    | 0.03774     | 526.0050344 |
| 17 | N16 | 18221 | CG7609  | 13.30077    | 0.036438333 | 365.0213603 |
| 17 | N17 | 20645 | CG8536  | 16.83534667 | 0.034137333 | 493.1652541 |
| 17 | N18 | 18212 | CG7886  | 13.27909    | 0.034092333 | 389.5037007 |
| 17 | N19 | 20686 | CG8695  | 14.42367    | 0.043209667 | 333.8065556 |
| 17 | N20 | 25365 | CG15818 | 12.49547    | 0.034408667 | 363.148916  |
| 17 | N21 | 18189 | CG6446  | 14.4352     | 0.029930333 | 482.2933256 |
| 17 | N22 | 25341 | CG15807 | 13.98816667 | 0.035267    | 396.6361377 |
| 17 | N23 | 18177 | CG6439  | 14.6919     | 0.031727    | 463.0724619 |



|    |     |       |                |             |             |             |
|----|-----|-------|----------------|-------------|-------------|-------------|
| 17 | N24 | 25381 | CG15890        | 15.51429    | 0.032078667 | 483.6326323 |
| 17 | O01 | 30347 | CG5581         | 7.409266    | 0.036907667 | 200.7514067 |
| 17 | O02 | 29943 | CG32090        | 12.21803333 | 0.04491     | 272.0559638 |
| 17 | O03 | 30320 | CG5475         | 13.64735    | 0.046653333 | 292.5267934 |
| 17 | O04 | 29960 | CG32175        | 12.63756433 | 0.049063    | 257.5783041 |
| 17 | O05 | 30353 | CG5285         | 11.4395     | 0.049066667 | 233.1419837 |
| 17 | O06 | 29968 | CG32108        | 10.38106833 | 0.057092    | 181.830525  |
| 17 | O07 | 30153 | CG32457        | 13.54314667 | 0.046511333 | 291.1794975 |
| 17 | O08 | 29969 | CG32118        | 13.74913667 | 0.055172667 | 249.2019599 |
| 17 | O09 | 30157 | CG32484        | 14.39100333 | 0.050771333 | 283.4474178 |
| 17 | O10 | 29971 | CG32161        | 14.13526667 | 0.048666333 | 290.4526743 |
| 17 | O11 | 30158 | CG3269         | 12.88169    | 0.042467667 | 303.3293565 |
| 17 | O12 | 29962 | CG32192        | 14.67985333 | 0.046307333 | 317.009257  |
| 17 | O13 | 30159 | CG3288         | 13.24492    | 0.042207    | 313.8086099 |
| 17 | O14 | 29963 | CG32202        | 14.40293667 | 0.054       | 266.7210494 |
| 17 | O15 | 30156 | CG3851         | 14.64134    | 0.038815667 | 377.2018171 |
| 17 | O16 | 29970 | CG32140        | 13.08261333 | 0.046235333 | 282.9570458 |
| 17 | O17 | 29919 | CG32083        | 14.31616    | 0.038075    | 375.9989494 |
| 17 | O18 | 23778 | CG1142         | 11.13423    | 0.040141667 | 277.3733859 |
| 17 | O19 | 29965 | CG32058        | 12.67921667 | 0.038499667 | 329.3331544 |
| 17 | O20 | 23850 | CG1158         | 13.63339    | 0.039125333 | 348.4542837 |
| 17 | O21 |       | wt             | 62.36786    | 0.037772667 | 1651.13733  |
| 17 | O22 |       | HFA17794       | 1.439387    | 0.009472    | 151.96231   |
| 17 | O23 |       | hpo            | 45.90869333 | 0.032202667 | 1425.617754 |
| 17 | O24 |       | Luc            | 2.188877333 | 0.044477667 | 49.21295332 |
| 17 | P01 | 23846 | CG11579,CG3109 | 15.39136    | 0.069121333 | 222.6716306 |
| 17 | P02 | 18204 | CG1902         | 13.95209    | 0.053354333 | 261.4987224 |
| 17 | P03 | 20661 | CG8643         | 14.68539667 | 0.059159667 | 248.2332558 |
| 17 | P04 | 18184 | CG6815         | 6.940592    | 0.055798333 | 124.3870844 |
| 17 | P05 | 20695 | CG8614         | 10.08627267 | 0.065441333 | 154.1269432 |
| 17 | P06 | 18218 | CG6677         | 4.860505667 | 0.055910667 | 86.93342356 |
| 17 | P07 | 20674 | CG8693         | 13.47045333 | 0.059072667 | 228.0319155 |
| 17 | P08 | 18214 | CG32067        | 10.12848767 | 0.049907    | 202.9472352 |
| 17 | P09 | 20693 | CG8562         | 14.06011333 | 0.057188    | 245.8577557 |
| 17 | P10 | 18215 | CG8062         | 11.57851333 | 0.044459333 | 260.4293062 |
| 17 | P11 | 20685 | CG8651         | 4.780081333 | 0.044388667 | 107.6869772 |
| 17 | P12 | 18196 | CG6822         | 13.25520333 | 0.048468667 | 273.4798426 |
| 17 | P13 | 20692 | CG8503         | 14.80637667 | 0.048486    | 305.3742661 |
| 17 | P14 | 18208 | CG6838         | 11.35797    | 0.053345333 | 212.9140318 |
| 17 | P15 | 20694 | CG8581         | 11.09424167 | 0.044869333 | 247.2566638 |
| 17 | P16 | 18223 | CG7806         | 11.82653333 | 0.047383333 | 249.5926838 |
| 17 | P17 | 20690 | CG8435         | 10.98563333 | 0.058575333 | 187.5470904 |
| 17 | P18 | 18224 | CG7889         | 10.09870233 | 0.036741    | 274.8619344 |
| 17 | P19 | 20691 | CG8468         | 13.20108    | 0.038791    | 340.3129592 |
| 17 | P20 | 25377 | CG15819        | 10.84662667 | 0.035615667 | 304.5465011 |
| 17 | P21 |       | wt             | 59.35324333 | 0.033244    | 1785.382124 |
| 17 | P22 |       | HFA17794       | 1.228231667 | 0.008821333 | 139.2342427 |
| 17 | P23 |       | hpo            | 43.20267333 | 0.032667667 | 1322.490332 |
| 17 | P24 |       | Luc            | 1.902048667 | 0.037843333 | 50.26112922 |
| 18 | A01 |       | DIAP1          | 0.310373    | 0.008773333 | 35.3768617  |
| 18 | A02 |       | ex/ft          | 34.38081    | 0.045388333 | 757.4812176 |
| 18 | A03 |       | Luc            | 1.808057    | 0.047074333 | 38.40855243 |
| 18 | A04 |       | hpo            | 37.3192     | 0.044976667 | 829.7457941 |
| 18 | A05 | 25299 | CG15916        | 9.358888333 | 0.041634    | 224.789555  |

|    |     |       |               |             |             |             |
|----|-----|-------|---------------|-------------|-------------|-------------|
| 18 | A06 | 27692 | CG14898       | 11.368767   | 0.051521    | 220.6627783 |
| 18 | A07 | 25332 | CG11001       | 14.14334333 | 0.046151667 | 306.453577  |
| 18 | A08 | 27697 | CG7841        | 10.07471967 | 0.043473333 | 231.7448167 |
| 18 | A09 | 30646 | CG8589        | 12.35105    | 0.046503333 | 265.5949394 |
| 18 | A10 | 27694 | CG4710        | 8.715654667 | 0.036540333 | 238.5214877 |
| 18 | A11 | 30648 | CG8687        | 11.69270667 | 0.040863667 | 286.1394393 |
| 18 | A12 | 27699 | CG9771        | 11.763386   | 0.048599667 | 242.0466396 |
| 18 | A13 | 30653 | CG8346        | 10.17733467 | 0.046071667 | 220.9022465 |
| 18 | A14 | 27690 | CG12142       | 11.82013133 | 0.041749333 | 283.1214391 |
| 18 | A15 | 30651 | CG8245        | 11.87209333 | 0.046760667 | 253.8905918 |
| 18 | A16 | 27598 | CG2219        | 8.649761667 | 0.03886     | 222.5877938 |
| 18 | A17 | 30647 | CG8629        | 10.84802333 | 0.037734667 | 287.4816261 |
| 18 | A18 | 27600 | CG5264        | 4.381130667 | 0.036569667 | 119.8023134 |
| 18 | A19 | 30655 | CG8475        | 8.932204    | 0.034032333 | 262.4622859 |
| 18 | A20 | 27599 | CG4279        | 9.585538    | 0.042006    | 228.194496  |
| 18 | A21 | 30668 | CG8541        | 9.466732667 | 0.036081333 | 262.3720299 |
| 18 | A22 | 27601 | CG32708       | 11.32552    | 0.03961     | 285.9257763 |
| 18 | A23 | 27693 | CG3051        | 10.197944   | 0.052569333 | 193.9903619 |
| 18 | A24 | 27593 | CG14207       | 13.47451333 | 0.040225667 | 334.9730272 |
| 18 | B01 |       | DIAP1         | 0.344569667 | 0.011225667 | 30.69480654 |
| 18 | B02 |       | ex/ft         | 34.88949667 | 0.053644    | 650.3895434 |
| 18 | B03 |       | Luc           | 1.725675333 | 0.062948667 | 27.4140093  |
| 18 | B04 |       | hpo           | 40.67754    | 0.042854333 | 949.2048256 |
| 18 | B05 | 27603 | CG9250        | 6.012539333 | 0.058535    | 102.7169955 |
| 18 | B06 | 24143 | CG1273        | 11.00693467 | 0.055221333 | 199.3239569 |
| 18 | B07 | 27604 | CG11228       | 32.81679    | 0.046350333 | 708.0162674 |
| 18 | B08 | 24229 | CG3047        | 11.76694333 | 0.051844333 | 226.9668173 |
| 18 | B09 | 27594 | CG12275       | 5.222861    | 0.042911    | 121.713803  |
| 18 | B10 | 23572 | CG9501        | 9.377735333 | 0.045774    | 204.8703485 |
| 18 | B11 | 27596 | CG31811       | 12.72486667 | 0.040300667 | 315.748292  |
| 18 | B12 | 23578 | CG6130        | 9.498913667 | 0.038602333 | 246.0709715 |
| 18 | B13 | 27602 | CG7712        | 11.2944     | 0.047362    | 238.4696592 |
| 18 | B14 | 23573 | CG32092       | 5.745141667 | 0.040187667 | 142.9578312 |
| 18 | B15 | 24149 | CG6811,CG9762 | 11.20055267 | 0.039159    | 286.0275458 |
| 18 | B16 | 23581 | CG5920        | 1.154734667 | 0.032472333 | 35.56056951 |
| 18 | B17 | 24148 | CG9684        | 11.99450333 | 0.044623333 | 268.7944274 |
| 18 | B18 | 23587 | CG6030        | 5.927634667 | 0.034357    | 172.5306245 |
| 18 | B19 | 24142 | CG9386        | 12.94130333 | 0.034668    | 373.2924695 |
| 18 | B20 | 23592 | CG6231        | 9.618874    | 0.041995667 | 229.0444411 |
| 18 | B21 | 24146 | CG8500,CG9470 | 11.76191667 | 0.035415667 | 332.1105537 |
| 18 | B22 | 23589 | CG6106        | 9.923861    | 0.030892667 | 321.2367876 |
| 18 | B23 | 24150 | CG9809        | 12.43754267 | 0.034305333 | 362.5541995 |
| 18 | B24 | 29114 | CG18586       | 18.35027    | 0.044961    | 408.1374969 |
| 18 | C01 | 25313 | CG16756       | 13.91892    | 0.052413    | 265.5623605 |
| 18 | C02 | 27703 | CG13623       | 14.37622667 | 0.041225667 | 348.7202956 |
| 18 | C03 | 25302 | CG16790       | 18.06525    | 0.048695333 | 370.9852416 |
| 18 | C04 | 27707 | CG6164,CG6173 | 1.359525333 | 0.044547333 | 30.51866928 |
| 18 | C05 | 25327 | CG16848       | 10.600186   | 0.047753333 | 221.9779282 |
| 18 | C06 | 27704 | CG14974       | 13.08193333 | 0.045300667 | 288.7801504 |
| 18 | C07 | 25382 | CG15914       | 13.14023667 | 0.043551    | 301.7206647 |
| 18 | C08 | 27709 | CG7917        | 15.89868333 | 0.046523333 | 341.7356882 |
| 18 | C09 | 30658 | CG8598        | 15.52621333 | 0.059032333 | 263.0120217 |
| 18 | C10 | 27706 | CG5326        | 12.77776667 | 0.049212    | 259.647376  |
| 18 | C11 | 30660 | CG8697        | 15.63260333 | 0.041994333 | 372.2550662 |

|    |     |       |         |             |             |             |
|----|-----|-------|---------|-------------|-------------|-------------|
| 18 | C12 | 27711 | CG9875  | 14.36263667 | 0.042927333 | 334.5802208 |
| 18 | C13 | 30712 | CG8335  | 17.48891    | 0.037655667 | 464.4429789 |
| 18 | C14 | 27780 | CG7781  | 14.24931    | 0.036914333 | 386.0102219 |
| 18 | C15 | 30722 | CG8228  | 16.17359    | 0.040578333 | 398.576991  |
| 18 | C16 | 27610 | CG2328  | 15.22849667 | 0.040169    | 379.1106741 |
| 18 | C17 | 30659 | CG8634  | 16.97559    | 0.042137    | 402.8666018 |
| 18 | C18 | 27612 | CG5268  | 14.17263333 | 0.037519333 | 377.7421418 |
| 18 | C19 | 30667 | CG8490  | 11.05803667 | 0.040136    | 275.5141685 |
| 18 | C20 | 27611 | CG4485  | 13.53555333 | 0.040948667 | 330.5493056 |
| 18 | C21 | 30680 | CG8543  | 17.63529    | 0.038608    | 456.7781289 |
| 18 | C22 | 27597 | CG17759 | 18.3956     | 0.039554667 | 465.0677543 |
| 18 | C23 | 27761 | CG2049  | 16.86752333 | 0.033243333 | 507.3956683 |
| 18 | C24 | 27681 | CG1987  | 13.32454    | 0.033030333 | 403.4031345 |
| 18 | D01 | 27613 | CG7007  | 13.42163667 | 0.041394    | 324.2411138 |
| 18 | D02 | 24144 | CG30497 | 13.81278    | 0.053926    | 256.1432333 |
| 18 | D03 | 27607 | CG14903 | 13.30129    | 0.046019    | 289.0390925 |
| 18 | D04 | 24152 | CG9967  | 12.33612267 | 0.047186    | 261.4360757 |
| 18 | D05 | 27615 | CG9334  | 14.41932333 | 0.053900667 | 267.5166046 |
| 18 | D06 | 24155 | CG1314  | 15.27747    | 0.047543    | 321.3400501 |
| 18 | D07 | 27616 | CG11320 | 15.86373    | 0.04758     | 333.4117276 |
| 18 | D08 | 23582 | CG9380  | 13.18414    | 0.050685667 | 260.1157461 |
| 18 | D09 | 27606 | CG16752 | 14.57017667 | 0.047148333 | 309.0284563 |
| 18 | D10 | 23595 | CG9468  | 12.36926333 | 0.040611667 | 304.5741372 |
| 18 | D11 | 27608 | CG16983 | 6.802152667 | 0.057005333 | 119.3248468 |
| 18 | D12 | 23590 | CG6136  | 13.44958    | 0.045500667 | 295.5908338 |
| 18 | D13 | 27614 | CG7804  | 15.96656    | 0.054806    | 291.3286866 |
| 18 | D14 | 23634 | CG6008  | 14.54721    | 0.036523667 | 398.2954431 |
| 18 | D15 | 24161 | CG9770  | 13.24784667 | 0.041493    | 319.2790752 |
| 18 | D16 | 23593 | CG5927  | 14.10736667 | 0.041006333 | 344.0289711 |
| 18 | D17 | 24160 | CG9705  | 15.41396333 | 0.044027667 | 350.0972116 |
| 18 | D18 | 23599 | CG6034  | 14.03807667 | 0.042440333 | 330.7720643 |
| 18 | D19 | 24151 | CG9896  | 15.19474667 | 0.035481333 | 428.246214  |
| 18 | D20 | 23619 | CG9486  | 13.05431    | 0.038591    | 338.2734316 |
| 18 | D21 | 24158 | CG9487  | 14.21115    | 0.034567333 | 411.1150219 |
| 18 | D22 | 23660 | CG6129  | 14.20599    | 0.036316    | 391.1771671 |
| 18 | D23 | 24162 | CG9812  | 15.44993667 | 0.031814667 | 485.6230879 |
| 18 | D24 | 29125 | CG18591 | 8.936756333 | 0.0515      | 173.5292492 |
| 18 | E01 | 25325 | CG16771 | 25.34203667 | 0.047859667 | 529.5071703 |
| 18 | E02 | 27715 | CG13695 | 25.54982    | 0.042746    | 597.7125345 |
| 18 | E03 | 25314 | CG16793 | 23.91028667 | 0.043536667 | 549.1988362 |
| 18 | E04 | 27719 | CG6253  | 1.710667    | 0.037298333 | 45.86443541 |
| 18 | E05 | 25339 | CG16865 | 19.50580667 | 0.035471667 | 549.8982286 |
| 18 | E06 | 27716 | CG15066 | 22.09070667 | 0.036011667 | 613.4319434 |
| 18 | E07 | 25356 | CG11023 | 21.09685    | 0.040584667 | 519.823168  |
| 18 | E08 | 27760 | CG11676 | 15.20621333 | 0.039591    | 384.0825777 |
| 18 | E09 | 30670 | CG8599  | 21.75775333 | 0.036773667 | 591.6666818 |
| 18 | E10 | 27770 | CG32698 | 18.81188333 | 0.034954667 | 538.1794515 |
| 18 | E11 | 30650 | CG8157  | 17.63842333 | 0.035298667 | 499.6909232 |
| 18 | E12 | 27723 | CG10704 | 16.947      | 0.038151667 | 444.2007776 |
| 18 | E13 | 30724 | CG8343  | 20.91517333 | 0.038908667 | 537.5453626 |
| 18 | E14 | 27714 | CG12601 | 16.19978    | 0.032511    | 498.2861185 |
| 18 | E15 | 30675 | CG8262  | 16.98334667 | 0.031597333 | 537.4930374 |
| 18 | E16 | 27622 | CG3204  | 19.08112667 | 0.037550333 | 508.1479969 |
| 18 | E17 | 30671 | CG8638  | 19.20782    | 0.036792667 | 522.0556633 |

|    |     |       |                |             |             |             |
|----|-----|-------|----------------|-------------|-------------|-------------|
| 18 | E18 | 27624 | CG6000         | 18.43124    | 0.033866    | 544.2402409 |
| 18 | E19 | 30654 | CG8397         | 16.5088     | 0.033685    | 490.0935134 |
| 18 | E20 | 27623 | CG4787         | 15.59939333 | 0.058969    | 264.5354904 |
| 18 | E21 | 30740 | CG8588         | 15.65162333 | 0.038198333 | 409.7462367 |
| 18 | E22 | 27677 | CG17349        | 16.15026    | 0.033333    | 484.5126451 |
| 18 | E23 | 27717 | CG4036         | 20.22399667 | 0.029774667 | 679.235032  |
| 18 | E24 | 27617 | CG14887        | 18.32064667 | 0.034631333 | 529.0193851 |
| 18 | F01 | 27625 | CG7130         | 16.22265333 | 0.061811    | 262.4557657 |
| 18 | F02 | 24156 | CG1623         | 18.70847667 | 0.049472667 | 378.157838  |
| 18 | F03 | 27619 | CG14966        | 22.05515    | 0.054037333 | 408.1465283 |
| 18 | F04 | 24164 | CG9973         | 13.14169    | 0.048434    | 271.3319156 |
| 18 | F05 | 27627 | CG9548         | 13.09305333 | 0.050446667 | 259.5424871 |
| 18 | F06 | 24217 | CG3025         | 20.38566333 | 0.042422    | 480.5446074 |
| 18 | F07 | 27628 | CG11386        | 12.89798333 | 0.046493333 | 277.4157585 |
| 18 | F08 | 23594 | CG9384         | 17.96795    | 0.044761333 | 401.4167734 |
| 18 | F09 | 27618 | CG13393        | 8.969806667 | 0.045488333 | 197.1891694 |
| 18 | F10 | 23596 | CG9504         | 14.93618333 | 0.038858    | 384.3785921 |
| 18 | F11 | 27620 | CG17202        | 18.33387333 | 0.045741    | 400.8192504 |
| 18 | F12 | 23588 | CG6072         | 14.13330333 | 0.036060333 | 391.9349054 |
| 18 | F13 | 27626 | CG7835         | 15.09503333 | 0.039780667 | 379.4565199 |
| 18 | F14 | 23645 | CG6009,CG6011  | 15.54522333 | 0.028578667 | 543.9450173 |
| 18 | F15 | 24173 | CG9777         | 16.50021333 | 0.036838667 | 447.9047378 |
| 18 | F16 | 23605 | CG5932         | 13.65108667 | 0.030634667 | 445.6091139 |
| 18 | F17 | 24172 | CG31349        | 19.78749667 | 0.034463    | 574.1664007 |
| 18 | F18 | 23611 | CG6048         | 13.57363333 | 0.030332    | 447.502088  |
| 18 | F19 | 24163 | CG9919         | 19.10242667 | 0.039405    | 484.7716449 |
| 18 | F20 | 23631 | CG9494         | 15.00560333 | 0.036911667 | 406.5273852 |
| 18 | F21 | 24170 | CG9497         | 15.27399    | 0.031392    | 486.5567661 |
| 18 | F22 | 23613 | CG6113         | 15.92897667 | 0.028541    | 558.108569  |
| 18 | F23 | 24174 | CG9815         | 17.19551    | 0.031681    | 542.7704302 |
| 18 | F24 | 29193 | CG18584        | 14.36261667 | 0.029065667 | 494.1437205 |
| 18 | G01 | 25337 | CG16779        | 15.79047    | 0.045392667 | 347.8638987 |
| 18 | G02 | 27727 | CG13935        | 16.24552333 | 0.040458667 | 401.5338288 |
| 18 | G03 | 25324 | CG16725        | 16.93100667 | 0.036427333 | 464.7885288 |
| 18 | G04 | 27708 | CG7013         | 14.23145333 | 0.050307    | 282.8921091 |
| 18 | G05 | 25322 | CG15897        | 13.07931333 | 0.044584667 | 293.3590023 |
| 18 | G06 | 27728 | CG15168        | 15.81018333 | 0.042410333 | 372.7908293 |
| 18 | G07 | 25372 | CG16736        | 19.51933667 | 0.043158333 | 452.2727167 |
| 18 | G08 | 27733 | CG11760,CG8116 | 17.30692333 | 0.045193667 | 382.9501921 |
| 18 | G09 | 30682 | CG8600         | 19.49239333 | 0.036216    | 538.2260143 |
| 18 | G10 | 27730 | CG5585,CG5605  | 9.678550333 | 0.042571    | 227.3507865 |
| 18 | G11 | 30684 | CG8705         | 14.84177333 | 0.045555    | 325.7989975 |
| 18 | G12 | 27724 | CG11405        | 18.10921667 | 0.040556667 | 446.5163968 |
| 18 | G13 | 30736 | CG8345         | 16.94565667 | 0.039847333 | 425.2645095 |
| 18 | G14 | 27726 | CG12612        | 17.53431667 | 0.034940333 | 501.8359871 |
| 18 | G15 | 30687 | CG8280         | 13.37339    | 0.041579    | 321.6380865 |
| 18 | G16 | 27634 | CG3214         | 23.6895     | 0.036529667 | 648.5003057 |
| 18 | G17 | 30716 | CG8582         | 17.35985667 | 0.029259667 | 593.3032958 |
| 18 | G18 | 27636 | CG6196         | 18.35280667 | 0.030896667 | 594.0060416 |
| 18 | G19 | 30691 | CG8498         | 19.54045    | 0.036715667 | 532.2101374 |
| 18 | G20 | 27635 | CG4800         | 19.41448667 | 0.028368    | 684.3798176 |
| 18 | G21 | 30704 | CG8579         | 19.25527    | 0.031602333 | 609.2989969 |
| 18 | G22 | 27621 | CG1249         | 11.48385733 | 0.044832    | 256.1531347 |
| 18 | G23 | 27773 | CG2872         | 17.0596     | 0.031701667 | 538.1294359 |

|    |     |       |                |             |             |             |
|----|-----|-------|----------------|-------------|-------------|-------------|
| 18 | G24 | 27629 | CG14904        | 16.34420667 | 0.035612333 | 458.94793   |
| 18 | H01 | 27637 | CG7172         | 14.21041    | 0.045744    | 310.6507957 |
| 18 | H02 | 24168 | CG1678         | 15.60674667 | 0.0449      | 347.5890126 |
| 18 | H03 | 27631 | CG15061        | 16.36472    | 0.042717667 | 383.0902125 |
| 18 | H04 | 24187 | CG9925         | 16.70722667 | 0.042592333 | 392.2590138 |
| 18 | H05 | 27639 | CG9697         | 16.07973333 | 0.044512667 | 361.2394974 |
| 18 | H06 | 24179 | CG1339         | 13.57830667 | 0.048386667 | 280.6208322 |
| 18 | H07 | 27640 | CG31612        | 14.13537333 | 0.040755333 | 346.8349337 |
| 18 | H08 | 23606 | CG9394         | 15.13466    | 0.034884    | 433.8567825 |
| 18 | H09 | 27630 | CG13795        | 15.17265667 | 0.036467667 | 416.0577863 |
| 18 | H10 | 23608 | CG9505         | 16.24389333 | 0.037929333 | 428.2673041 |
| 18 | H11 | 27632 | CG17272        | 15.47677333 | 0.039746    | 389.3919724 |
| 18 | H12 | 23614 | CG6144         | 15.39210333 | 0.038940667 | 395.2706682 |
| 18 | H13 | 27638 | CG7887         | 5.029474    | 0.040626333 | 123.7983738 |
| 18 | H14 | 23609 | CG5963         | 12.53941    | 0.035467667 | 353.5448249 |
| 18 | H15 | 24185 | CG9781         | 15.21385667 | 0.034964667 | 435.1208839 |
| 18 | H16 | 23627 | CG6205         | 15.81882    | 0.029751    | 531.7071695 |
| 18 | H17 | 24159 | CG31150,CG4546 | 15.63209    | 0.035164333 | 444.5439034 |
| 18 | H18 | 23598 | CG5999         | 15.40897    | 0.028353333 | 543.4623795 |
| 18 | H19 | 24178 | CG30388,CG9406 | 16.35297    | 0.033305667 | 490.9966272 |
| 18 | H20 | 23628 | CG9345         | 11.84836333 | 0.033846    | 350.0668715 |
| 18 | H21 | 24207 | CG9654         | 18.70384667 | 0.03635     | 514.5487391 |
| 18 | H22 | 23625 | CG6123         | 16.11971667 | 0.028906    | 557.6598861 |
| 18 | H23 | 24219 | CG9681         | 15.57029333 | 0.033544667 | 464.1659876 |
| 18 | H24 | 29149 | CG18600        | 13.67826667 | 0.030932667 | 442.1948749 |
| 18 | I01 | 25349 | CG16781        | 16.92622    | 0.046489333 | 364.0882496 |
| 18 | I02 | 27722 | CG9236         | 17.14101333 | 0.045473    | 376.9492519 |
| 18 | I03 | 25336 | CG16726        | 19.42318667 | 0.050400667 | 385.3755903 |
| 18 | I04 | 27743 | CG6493         | 26.13191667 | 0.073400667 | 356.0174295 |
| 18 | I05 | 25347 | CG16700        | 17.75032667 | 0.044068667 | 402.7879219 |
| 18 | I06 | 27740 | CG15211        | 16.83003333 | 0.041358333 | 406.9320975 |
| 18 | I07 | 30664 | CG8325         | 14.89841667 | 0.049935333 | 298.3542048 |
| 18 | I08 | 27745 | CG33205        | 17.69122    | 0.049466    | 357.6440383 |
| 18 | I09 | 30694 | CG8601         | 20.05295667 | 0.046377333 | 432.3870138 |
| 18 | I10 | 27742 | CG5654         | 18.08062333 | 0.039906333 | 453.0765376 |
| 18 | I11 | 30696 | CG8722         | 17.59156    | 0.039500667 | 445.3484329 |
| 18 | I12 | 27736 | CG11562        | 14.74983    | 0.040324    | 365.7829084 |
| 18 | I13 | 30701 | CG8369         | 17.65591    | 0.045806333 | 385.4469178 |
| 18 | I14 | 27782 | CG9740         | 18.80055    | 0.041227333 | 456.0214906 |
| 18 | I15 | 30699 | CG8293         | 14.76926667 | 0.038249333 | 386.1313487 |
| 18 | I16 | 27646 | CG3242         | 15.76823    | 0.039778333 | 396.4024804 |
| 18 | I17 | 30657 | CG8021         | 15.44733333 | 0.040123    | 384.99946   |
| 18 | I18 | 27648 | CG6500         | 11.19016333 | 0.032655333 | 342.6749076 |
| 18 | I19 | 30678 | CG8412         | 18.01248333 | 0.038989333 | 461.9849019 |
| 18 | I20 | 27647 | CG4940         | 16.16917667 | 0.036446333 | 443.6434392 |
| 18 | I21 | 27701 | CG1163         | 6.575111333 | 0.024524    | 268.1092535 |
| 18 | I22 | 27633 | CG1330         | 16.22423    | 0.034685667 | 467.7502715 |
| 18 | I23 | 27741 | CG4210         | 15.78733333 | 0.031155333 | 506.7297199 |
| 18 | I24 | 27641 | CG15427        | 15.92893    | 0.033712333 | 472.4956247 |
| 18 | J01 | 27649 | CG7291         | 14.19873533 | 0.067627333 | 209.9555702 |
| 18 | J02 | 24169 | CG1759         | 12.95087667 | 0.052134    | 248.4151737 |
| 18 | J03 | 27643 | CG15455        | 13.71549    | 0.057589333 | 238.1602496 |
| 18 | J04 | 24188 | CG9996         | 18.75343    | 0.054473    | 344.2701889 |
| 18 | J05 | 27651 | CG12478        | 16.26134333 | 0.050708667 | 320.6817375 |

|    |     |       |         |             |             |             |
|----|-----|-------|---------|-------------|-------------|-------------|
| 18 | J06 | 24191 | CG1360  | 13.18104    | 0.043752667 | 301.2625516 |
| 18 | J07 | 27652 | CG11748 | 17.07091667 | 0.053553333 | 318.7647828 |
| 18 | J08 | 23618 | CG9416  | 15.68199333 | 0.038990333 | 402.2020843 |
| 18 | J09 | 27642 | CG14206 | 1.713337    | 0.037916333 | 45.18730714 |
| 18 | J10 | 23620 | CG9507  | 17.01147667 | 0.050157667 | 339.1600486 |
| 18 | J11 | 27644 | CG17361 | 16.23985667 | 0.043585333 | 372.5991159 |
| 18 | J12 | 23626 | CG6148  | 14.604153   | 0.036768    | 397.1973727 |
| 18 | J13 | 27650 | CG8210  | 12.50165667 | 0.035440333 | 352.7522315 |
| 18 | J14 | 23621 | CG5988  | 11.09448667 | 0.034647    | 320.2149296 |
| 18 | J15 | 24197 | CG9796  | 16.49488667 | 0.039167333 | 421.1388742 |
| 18 | J16 | 23629 | CG5948  | 15.64406    | 0.040905667 | 382.4423674 |
| 18 | J17 | 24196 | CG9734  | 16.03051667 | 0.039915333 | 401.6129975 |
| 18 | J18 | 23635 | CG6055  | 15.08637    | 0.031905333 | 472.8479042 |
| 18 | J19 | 24190 | CG9412  | 16.02028333 | 0.036009667 | 444.8884096 |
| 18 | J20 | 23640 | CG9358  | 14.00975667 | 0.031699333 | 441.9574544 |
| 18 | J21 | 24194 | CG9552  | 14.01199333 | 0.032012333 | 437.7060924 |
| 18 | J22 | 29110 | CG18543 | 15.7275     | 0.032442333 | 484.7832564 |
| 18 | J23 | 24198 | CG9839  | 16.22311    | 0.040677    | 398.827593  |
| 18 | J24 | 29161 | CG18607 | 14.20659333 | 0.034761333 | 408.6895401 |
| 18 | K02 | 27751 | CG14357 | 12.33520067 | 0.044171667 | 279.2559484 |
| 18 | K03 | 25350 | CG33009 | 14.28423333 | 0.050157333 | 284.7885321 |
| 18 | K04 | 27755 | CG30101 | 13.99888333 | 0.049064667 | 285.3149585 |
| 18 | K05 | 25359 | CG16708 | 13.56889667 | 0.048637    | 278.9830102 |
| 18 | K06 | 27752 | CG12676 | 12.48693667 | 0.051380667 | 243.0279223 |
| 18 | K07 | 30705 | CG8066  | 8.601052667 | 0.042775667 | 201.0734919 |
| 18 | K08 | 27757 | CG8198  | 11.70159567 | 0.04469     | 261.8392407 |
| 18 | K09 | 30706 | CG8609  | 10.017889   | 0.041219    | 243.0405638 |
| 18 | K1  | 25361 | CG16785 | 6.700588333 | 0.033861333 | 197.8831804 |
| 18 | K10 | 27754 | CG5739  | 9.486244333 | 0.037539667 | 252.6992159 |
| 18 | K11 | 30708 | CG8743  | 16.78673667 | 0.028303333 | 593.1010482 |
| 18 | K12 | 27748 | CG32514 | 10.36795533 | 0.040656    | 255.0166109 |
| 18 | K13 | 30713 | CG8376  | 8.022260667 | 0.038505    | 208.3433493 |
| 18 | K14 | 27750 | CG13383 | 5.644430667 | 0.041345    | 136.5202725 |
| 18 | K15 | 30726 | CG8444  | 8.875563667 | 0.034331667 | 258.5241128 |
| 18 | K16 | 27658 | CG3604  | 12.28456333 | 0.056584    | 217.1031269 |
| 18 | K17 | 30707 | CG8671  | 10.93652933 | 0.033708333 | 324.445864  |
| 18 | K18 | 27660 | CG6580  | 12.11216667 | 0.037410333 | 323.7652698 |
| 18 | K19 | 30715 | CG8510  | 12.61823667 | 0.041553667 | 303.6612092 |
| 18 | K20 | 27659 | CG4993  | 12.10100667 | 0.037265667 | 324.722667  |
| 18 | K21 | 27713 | CG33045 | 10.60878167 | 0.032669667 | 324.7288004 |
| 18 | K22 | 27645 | CG32675 | 10.52692333 | 0.038647667 | 272.3818601 |
| 18 | K23 | 27737 | CG1980  | 12.82493333 | 0.040157667 | 319.3645049 |
| 18 | K24 | 27653 | CG16904 | 11.00072667 | 0.032614667 | 337.2938555 |
| 18 | L01 | 27661 | CG7345  | 10.293868   | 0.062476333 | 164.7642787 |
| 18 | L02 | 24153 | CG1153  | 15.94241    | 0.054204333 | 294.116891  |
| 18 | L03 | 27655 | CG15525 | 10.60270167 | 0.056175667 | 188.741893  |
| 18 | L04 | 24225 | CG1246  | 12.85688    | 0.051501667 | 249.6400764 |
| 18 | L05 | 27663 | CG10325 | 10.99207067 | 0.041369    | 265.7079133 |
| 18 | L06 | 24203 | CG1421  | 14.04714333 | 0.044398    | 316.391354  |
| 18 | L07 | 27664 | CG11753 | 9.703537333 | 0.048308667 | 200.865352  |
| 18 | L08 | 23630 | CG9431  | 11.93981333 | 0.050310333 | 237.3232802 |
| 18 | L09 | 27654 | CG14499 | 10.759417   | 0.042794    | 251.4234939 |
| 18 | L10 | 23632 | CG9508  | 10.12248733 | 0.037387    | 270.7488521 |
| 18 | L11 | 27656 | CG17477 | 12.43730333 | 0.039269667 | 316.7152764 |

|    |     |       |                       |             |             |             |
|----|-----|-------|-----------------------|-------------|-------------|-------------|
| 18 | L12 | 23638 | CG6149                | 11.584639   | 0.034537667 | 335.4204299 |
| 18 | L13 | 27662 | CG8690                | 14.70790333 | 0.037478    | 392.4409876 |
| 18 | L14 | 23633 | CG31089               | 8.762507    | 0.03756     | 233.2935836 |
| 18 | L15 | 24209 | CG31523               | 9.902193    | 0.044108    | 224.4987984 |
| 18 | L16 | 23650 | CG6210                | 14.69625667 | 0.042358    | 346.9535074 |
| 18 | L17 | 24208 | CG9741                | 10.96245233 | 0.037594667 | 291.5959445 |
| 18 | L18 | 23622 | CG6006                | 8.648056    | 0.034671    | 249.4319748 |
| 18 | L19 | 24202 | CG9415                | 9.376459    | 0.038051333 | 246.4160432 |
| 18 | L20 | 23651 | CG9361                | 6.553781333 | 0.039780333 | 164.7492815 |
| 18 | L21 | 24206 | CG9569                | 12.96366    | 0.033709333 | 384.5718298 |
| 18 | L22 | 29157 | CG18558               | 15.20516667 | 0.037907333 | 401.1141204 |
| 18 | L23 | 24210 | CG30190               | 11.758614   | 0.035642333 | 329.9058423 |
| 18 | L24 | 29173 | CG18616               | 10.38571733 | 0.038054667 | 272.9157353 |
| 18 | M01 | 25373 | CG16787               | 18.29931667 | 0.054338667 | 336.7641827 |
| 18 | M02 | 27746 | CG9353                | 13.66712333 | 0.045176333 | 302.5283888 |
| 18 | M03 | 25362 | CG31728               | 12.76033    | 0.046624333 | 273.6839133 |
| 18 | M04 | 27744 | CG7305                | 14.58111667 | 0.039129    | 372.6422006 |
| 18 | M05 | 25358 | CG15911               | 14.98875333 | 0.043494667 | 344.6112933 |
| 18 | M06 | 27753 | CG32578,CG4211        | 10.941107   | 0.0547      | 200.0202377 |
| 18 | M07 | 30688 | CG8330                | 13.74283667 | 0.043143333 | 318.5390559 |
| 18 | M08 | 27769 | CG8289                | 15.82101667 | 0.046821    | 337.904288  |
| 18 | M09 | 30718 | CG8612                | 14.47299667 | 0.037389333 | 387.0889202 |
| 18 | M10 | 27777 | CG4491                | 14.46976333 | 0.035170667 | 411.4156684 |
| 18 | M11 | 30720 | CG8764                | 10.20366933 | 0.035472333 | 287.6514843 |
| 18 | M12 | 27771 | CG11015               | 13.19756    | 0.039792    | 331.663651  |
| 18 | M13 | 30725 | CG8390                | 12.94768333 | 0.038564333 | 335.742439  |
| 18 | M14 | 27762 | CG13420               | 14.29132    | 0.038107667 | 375.0247982 |
| 18 | M15 | 30723 | CG8308                | 11.92832333 | 0.042581    | 280.1325317 |
| 18 | M16 | 27670 | CG3751                | 1.740081333 | 0.031836667 | 54.65651764 |
| 18 | M17 | 30719 | CG8674                | 14.71817    | 0.042067    | 349.8744859 |
| 18 | M18 | 27672 | CG6702                | 11.08014333 | 0.034824    | 318.175492  |
| 18 | M19 | 30702 | CG8426                | 18.56898333 | 0.038355667 | 484.1262047 |
| 18 | M20 | 27671 | CG5157                | 12.04332    | 0.031279    | 385.0289332 |
| 18 | M21 | 27725 | CG1507                | 12.46055333 | 0.033036    | 377.181055  |
| 18 | M22 | 27657 | CG1577                | 14.11113333 | 0.037348    | 377.8283531 |
| 18 | M23 | 27749 | CG2022                | 13.83839333 | 0.030097    | 459.7931134 |
| 18 | M24 | 27665 | CG17136               | 18.48442    | 0.035970667 | 513.8748239 |
| 18 | N01 | 27673 | CG7398                | 22.00997    | 0.025202667 | 873.3190932 |
| 18 | N02 | 24201 | CG10050,CG1152,CG1176 | 12.93315333 | 0.044939333 | 287.7913928 |
| 18 | N03 | 27667 | CG15616               | 12.77414667 | 0.04819     | 265.0787854 |
| 18 | N04 | 24223 | CG9938                | 16.02622333 | 0.072452333 | 221.1967869 |
| 18 | N05 | 27675 | CG10603               | 14.02310333 | 0.048964    | 286.3961958 |
| 18 | N06 | 24215 | CG1447                | 13.26023667 | 0.043301333 | 306.2316018 |
| 18 | N07 | 27676 | CG11801               | 15.98872    | 0.043520667 | 367.3822399 |
| 18 | N08 | 23642 | CG9444                | 13.62887667 | 0.040575    | 335.8934483 |
| 18 | N09 | 27666 | CG14548               | 16.71085667 | 0.043760667 | 381.8693347 |
| 18 | N10 | 23644 | CG9509                | 13.25577667 | 0.034164    | 388.0042345 |
| 18 | N11 | 27668 | CG18125               | 14.45085    | 0.039923    | 361.9680385 |
| 18 | N12 | 23649 | CG6154                | 13.06197333 | 0.042246    | 309.1884044 |
| 18 | N13 | 27686 | CG9106                | 14.64932    | 0.042285    | 346.4424737 |
| 18 | N14 | 23643 | CG9499                | 12.91387    | 0.038759    | 333.1837767 |
| 18 | N15 | 24221 | CG30412               | 12.76472333 | 0.036034667 | 354.2345334 |
| 18 | N16 | 23652 | CG5952                | 13.21845333 | 0.031111333 | 424.8758223 |
| 18 | N17 | 24220 | CG9747                | 13.47966333 | 0.035200667 | 382.9377285 |

|    |     |       |                 |             |             |             |
|----|-----|-------|-----------------|-------------|-------------|-------------|
| 18 | N18 | 23658 | CG6069          | 11.98786667 | 0.031966    | 375.0192913 |
| 18 | N19 | 24183 | CG9640          | 12.29842333 | 0.02965     | 414.7866217 |
| 18 | N20 | 23612 | CG6092          | 9.993036667 | 0.030460667 | 328.063623  |
| 18 | N21 | 24218 | CG13109,CG9586  | 12.94066667 | 0.034190667 | 378.4853566 |
| 18 | N22 | 29169 | CG18561         | 13.17381    | 0.033076333 | 398.285078  |
| 18 | N23 | 24222 | CG9852          | 15.78254    | 0.031121    | 507.1347322 |
| 18 | N24 | 29185 | CG1862          | 12.87056    | 0.031036    | 414.6977703 |
| 18 | O01 | 25348 | CG16732         | 12.79950333 | 0.060088333 | 213.0114554 |
| 18 | O02 | 27758 | CG9568          | 12.41341    | 0.049471667 | 250.9195836 |
| 18 | O03 | 25360 | CG16733         | 13.19519333 | 0.049433333 | 266.9290627 |
| 18 | O04 | 27756 | CG7362          | 20.39035    | 0.051783    | 393.7653284 |
| 18 | O05 | 25370 | CG15912,CG17592 | 10.206845   | 0.045659    | 223.5450842 |
| 18 | O06 | 27765 | CG4317          | 13.46547667 | 0.043465667 | 309.7957008 |
| 18 | O07 | 30700 | CG8331          | 12.84283667 | 0.048233667 | 266.2629146 |
| 18 | O08 | 27781 | CG9067          | 14.20317333 | 0.057741667 | 245.97789   |
| 18 | O09 | 30730 | CG8627          | 14.73400333 | 0.044166333 | 333.6025932 |
| 18 | O10 | 27778 | CG33108,CG5915  | 11.47525    | 0.048511667 | 236.5461916 |
| 18 | O11 | 30732 | CG8771          | 7.960291    | 0.046233    | 172.1776869 |
| 18 | O12 | 27783 | CG11188         | 8.898201333 | 0.055151667 | 161.3405699 |
| 18 | O13 | 30737 | CG8396          | 13.78109    | 0.055219    | 249.5715243 |
| 18 | O14 | 27784 | CG31100         | 10.90764467 | 0.03948     | 276.282793  |
| 18 | O15 | 30735 | CG8317          | 9.37963     | 0.041652667 | 225.1867828 |
| 18 | O16 | 27682 | CG3796          | 11.53083333 | 0.044293333 | 260.3288682 |
| 18 | O17 | 30693 | CG8044          | 12.65662667 | 0.044683667 | 283.2495095 |
| 18 | O18 | 27684 | CG6870          | 13.13067333 | 0.037834333 | 347.0570822 |
| 18 | O19 | 30733 | CG8156          | 11.12134667 | 0.036651    | 303.4391058 |
| 18 | O20 | 27669 | CG1695          | 12.21755333 | 0.037554333 | 325.3300551 |
| 18 | O21 |       | wts             | 58.86256    | 0.035446667 | 1660.595072 |
| 18 | O22 |       | HFA17794        | 1.290601333 | 0.009962667 | 129.5437634 |
| 18 | O23 |       | hpo             | 41.81460333 | 0.030942    | 1351.386573 |
| 18 | O24 |       | Luc             | 2.057485    | 0.042098333 | 48.87331248 |
| 18 | P01 | 27685 | CG7519          | 14.31479333 | 0.064658667 | 221.390172  |
| 18 | P02 | 24177 | CG1162          | 15.35463667 | 0.05812     | 264.188518  |
| 18 | P03 | 27679 | CG16834         | 11.90026667 | 0.059215667 | 200.9648348 |
| 18 | P04 | 24235 | CG9948          | 10.25151467 | 0.051152333 | 200.4114768 |
| 18 | P05 | 27687 | CG10753         | 8.699003    | 0.052296333 | 166.3405911 |
| 18 | P06 | 24227 | CG1550          | 9.732165333 | 0.047891333 | 203.2134972 |
| 18 | P07 | 27688 | CG12071         | 10.24288967 | 0.054377667 | 188.3657445 |
| 18 | P08 | 23653 | CG9452          | 11.89359067 | 0.042768333 | 278.0933869 |
| 18 | P09 | 27678 | CG14550         | 11.37968    | 0.057786667 | 196.9257037 |
| 18 | P10 | 23655 | CG9512          | 11.59407    | 0.043321333 | 267.6295743 |
| 18 | P11 | 27680 | CG18262         | 13.83495333 | 0.043333333 | 319.2681538 |
| 18 | P12 | 23647 | CG6097          | 9.664176333 | 0.048505667 | 199.238089  |
| 18 | P13 | 24147 | CG31322         | 10.11349067 | 0.045893    | 220.3710951 |
| 18 | P14 | 23656 | CG5992          | 9.846500667 | 0.037748333 | 260.8459711 |
| 18 | P15 | 24233 | CG32940         | 10.33631167 | 0.045204333 | 228.6575402 |
| 18 | P16 | 23657 | CG6012          | 8.656525    | 0.037285    | 232.1717849 |
| 18 | P17 | 24232 | CG9748          | 9.801011667 | 0.040085333 | 244.5036838 |
| 18 | P18 | 23659 | CG6099          | 9.721109    | 0.034763    | 279.6395305 |
| 18 | P19 | 24226 | CG9467          | 13.44556667 | 0.037236333 | 361.0872893 |
| 18 | P20 | 23624 | CG6093          | 11.18595967 | 0.030297333 | 369.2060797 |
| 18 | P21 |       | wts             | 56.52272333 | 0.031899333 | 1771.909235 |
| 18 | P22 |       | HFA17794        | 1.198498    | 0.009077667 | 132.0270995 |
| 18 | P23 |       | hpo             | 39.54524333 | 0.037109    | 1065.65101  |



|    |     |       |                 |             |             |             |
|----|-----|-------|-----------------|-------------|-------------|-------------|
| 18 | P24 |       | Luc             | 1.941942    | 0.037906667 | 51.22956384 |
| 19 | A01 |       | DIAP1           | 0.51287     | 0.019144667 | 26.78918411 |
| 19 | A02 |       | ex/ft           | 42.61599667 | 0.056329    | 756.5551788 |
| 19 | A03 |       | Luc             | 1.831951    | 0.059408667 | 30.83642678 |
| 19 | A04 |       | hpo             | 36.03698333 | 0.053888333 | 668.7344199 |
| 19 | A05 | 29117 | CG18788         | 10.76237233 | 0.056461667 | 190.6137911 |
| 19 | A06 | 27023 | CG8738          | 10.95158733 | 0.054185667 | 202.112256  |
| 19 | A07 | 29111 | CG2150          | 11.17345    | 0.058924667 | 189.6226255 |
| 19 | A08 | 27027 | CG8945          | 11.15399    | 0.053257333 | 209.4357585 |
| 19 | A09 | 29132 | CG2021          | 10.38004967 | 0.058815667 | 176.4844344 |
| 19 | A10 | 27028 | CG8964          | 7.977144    | 0.05652     | 141.1384289 |
| 19 | A11 | 29126 | CG18649         | 9.624941667 | 0.050201    | 191.7280864 |
| 19 | A12 | 27020 | CG9093          | 11.39867    | 0.051995    | 219.2262718 |
| 19 | A13 | 29178 | CG1913          | 11.638944   | 0.089249333 | 130.4093102 |
| 19 | A14 | 27021 | CG32566         | 12.14705333 | 0.053165667 | 228.4755199 |
| 19 | A15 | 18609 | CG6296          | 11.03601067 | 0.043996    | 250.841228  |
| 19 | A16 | 27019 | CG14100         | 10.244155   | 0.047608    | 215.1771761 |
| 19 | A17 | 18613 | CG6335          | 10.98580533 | 0.050127333 | 219.1579843 |
| 19 | A18 | 16453 | CG11913         | 10.376726   | 0.049375333 | 210.1601204 |
| 19 | A19 | 18614 | CG6354          | 12.12383267 | 0.046802667 | 259.0414934 |
| 19 | A20 | 16447 | CG11655         | 9.706861    | 0.042573    | 228.0050971 |
| 19 | A21 | 18617 | CG6445          | 12.54369333 | 0.04981     | 251.8308238 |
| 19 | A22 | 16452 | CG11892         | 12.20951    | 0.041981    | 290.8341869 |
| 19 | A23 | 18615 | CG6393          | 13.748      | 0.049748    | 276.3528182 |
| 19 | A24 | 16450 | CG11822         | 12.29214733 | 0.053951    | 227.8391009 |
| 19 | B01 |       | DIAP1           | 0.369612    | 0.020057    | 18.42807997 |
| 19 | B02 |       | ex/ft           | 33.16126667 | 0.058465667 | 567.1921413 |
| 19 | B03 |       | Luc             | 1.707389    | 0.061110333 | 27.93944832 |
| 19 | B04 |       | hpo             | 33.89173    | 0.064114    | 528.6166828 |
| 19 | B05 | 16454 | CG11981         | 1.058696667 | 0.033087333 | 31.99703814 |
| 19 | B06 | 21374 | CG17086,CG6627  | 11.26871667 | 0.059458333 | 189.5229152 |
| 19 | B07 | 16530 | CG12874         | 11.18403667 | 0.054053667 | 206.9061612 |
| 19 | B08 | 21368 | CG17508         | 11.58635667 | 0.061567    | 188.1910222 |
| 19 | B09 | 22993 | CG6018          | 10.92702    | 0.057081333 | 191.4289552 |
| 19 | B10 | 21371 | CG15444         | 10.55133333 | 0.052996667 | 199.0942827 |
| 19 | B11 | 23002 | CG9357          | 11.65393033 | 0.063940333 | 182.2625833 |
| 19 | B12 | 21378 | CG13393,CG17295 | 12.44722333 | 0.055055667 | 226.0843268 |
| 19 | B13 | 22998 | CG6133          | 16.03939333 | 0.065795    | 243.7783013 |
| 19 | B14 | 31130 | CG17757         | 10.94828667 | 0.051176    | 213.9340055 |
| 19 | B15 | 22999 | CG6178          | 12.58742    | 0.058288    | 215.9521685 |
| 19 | B16 | 31124 | CG15458         | 11.0833     | 0.049097667 | 225.7398519 |
| 19 | B17 | 22997 | CG6073          | 12.12144    | 0.048908    | 247.8416619 |
| 19 | B18 | 31125 | CG32774         | 10.55261933 | 0.056432    | 186.997082  |
| 19 | B19 | 23004 | CG9425          | 14.37118    | 0.051485667 | 279.1297254 |
| 19 | B20 | 31122 | CG14231         | 11.69448267 | 0.052150333 | 224.2455977 |
| 19 | B21 | 22995 | CG9537          | 13.45806    | 0.051931333 | 259.1510584 |
| 19 | B22 | 31128 | CG14633         | 10.81063333 | 0.043216    | 250.1534925 |
| 19 | B23 | 23003 | CG9390          | 11.73979333 | 0.045979    | 255.329462  |
| 19 | B24 | 31131 | CG11696,CG15191 | 16.76888667 | 0.048207    | 347.8516951 |
| 19 | C01 | 29128 | CG18765         | 12.82767667 | 0.056151667 | 228.4469443 |
| 19 | C02 | 27036 | CG13951         | 13.92976333 | 0.058576667 | 237.8039606 |
| 19 | C03 | 29127 | CG18735         | 13.7467     | 0.059181333 | 232.281012  |
| 19 | C04 | 27037 | CG8853          | 10.82612767 | 0.061287333 | 176.6454352 |
| 19 | C05 | 29129 | CG18801         | 13.57925333 | 0.056947333 | 238.4528395 |

|    |     |       |                |             |             |             |
|----|-----|-------|----------------|-------------|-------------|-------------|
| 19 | C06 | 27035 | CG8757         | 17.11323    | 0.056281667 | 304.0640232 |
| 19 | C07 | 29142 | CG18869        | 13.32864    | 0.054324333 | 245.3530339 |
| 19 | C08 | 27039 | CG8949         | 7.641579    | 0.055665    | 137.2779844 |
| 19 | C09 | 29144 | CG2043         | 16.77959667 | 0.057434333 | 292.1527193 |
| 19 | C10 | 27040 | CG8966         | 10.529395   | 0.055174667 | 190.8374918 |
| 19 | C11 | 29138 | CG18662        | 13.36913667 | 0.053773333 | 248.6201959 |
| 19 | C12 | 27029 | CG9010         | 14.08277    | 0.056155667 | 250.7809245 |
| 19 | C13 | 29190 | CG1919         | 16.34106667 | 0.055353333 | 295.2137782 |
| 19 | C14 | 27033 | CG9128         | 14.67451    | 0.054804667 | 267.7602272 |
| 19 | C15 | 18621 | CG32548        | 14.35735333 | 0.048018    | 298.999403  |
| 19 | C16 | 27031 | CG14216        | 18.29864667 | 0.054146667 | 337.9459493 |
| 19 | C17 | 18625 | CG6338         | 12.55199    | 0.051868333 | 241.9971723 |
| 19 | C18 | 16465 | CG11921        | 13.37509333 | 0.044143333 | 302.9923733 |
| 19 | C19 | 18626 | CG6356         | 14.60422667 | 0.049809    | 293.2045748 |
| 19 | C20 | 16459 | CG11664        | 14.23677333 | 0.052899    | 269.1312375 |
| 19 | C21 | 18629 | CG6454         | 14.85662667 | 0.048738333 | 304.8242656 |
| 19 | C22 | 16499 | CG11859        | 9.841591    | 0.051295333 | 191.8613324 |
| 19 | C23 | 18627 | CG6394         | 16.88040333 | 0.051053667 | 330.6403719 |
| 19 | C24 | 16443 | CG11593        | 20.65862333 | 0.047196333 | 437.7167012 |
| 19 | D01 | 16446 | CG12809        | 16.34288    | 0.073168667 | 223.358997  |
| 19 | D02 | 23068 | CG9631         | 14.59999333 | 0.072994667 | 200.0145216 |
| 19 | D03 | 16444 | CG12018        | 9.064794    | 0.054634667 | 165.9165243 |
| 19 | D04 | 21377 | CG1404,CG15201 | 17.17077    | 0.059551    | 288.3372236 |
| 19 | D05 | 16466 | CG11982        | 15.15570667 | 0.058595    | 258.6518759 |
| 19 | D06 | 21386 | CG17100        | 8.837596    | 0.061031333 | 144.8042426 |
| 19 | D07 | 23012 | CG6214         | 13.96035333 | 0.059404333 | 235.0056393 |
| 19 | D08 | 21380 | CG17510        | 10.40873333 | 0.056518333 | 184.16561   |
| 19 | D09 | 23005 | CG6022         | 14.42537    | 0.072241333 | 199.6830531 |
| 19 | D10 | 21383 | CG32512        | 11.785622   | 0.052093    | 226.2419519 |
| 19 | D11 | 23014 | CG9360         | 15.34238667 | 0.055967667 | 274.1294676 |
| 19 | D12 | 31126 | CG14438        | 20.87882667 | 0.060016333 | 347.8857422 |
| 19 | D13 | 23010 | CG6146         | 14.6126     | 0.060227333 | 242.6240577 |
| 19 | D14 | 31142 | CG15044        | 14.74925333 | 0.057315    | 257.3367065 |
| 19 | D15 | 23011 | CG6179         | 14.1292     | 0.057933667 | 243.8858234 |
| 19 | D16 | 31139 | CG17601        | 17.10434667 | 0.056310333 | 303.7514725 |
| 19 | D17 | 23009 | CG6083         | 18.03517667 | 0.050301667 | 358.5403399 |
| 19 | D18 | 31137 | CG15577        | 13.70205333 | 0.047489    | 288.5310984 |
| 19 | D19 | 23008 | CG9590         | 15.37974    | 0.045227    | 340.0566034 |
| 19 | D20 | 31134 | CG14265        | 13.80110333 | 0.045932    | 300.4681558 |
| 19 | D21 | 23007 | CG9538         | 16.45988    | 0.049602667 | 331.8345788 |
| 19 | D22 | 31140 | CG14773        | 13.54229333 | 0.043284667 | 312.8658339 |
| 19 | D23 | 23078 | CG9536         | 14.52413667 | 0.043911    | 330.7630586 |
| 19 | D24 | 31143 | CG15201        | 15.48929333 | 0.052841667 | 293.12651   |
| 19 | E01 | 29183 | CG2611         | 20.53214667 | 0.051393    | 399.5125147 |
| 19 | E02 | 27048 | CG8809         | 19.12556    | 0.058483667 | 327.0239554 |
| 19 | E03 | 29135 | CG2512         | 16.16863667 | 0.054653333 | 295.8399    |
| 19 | E04 | 27049 | CG8862         | 18.41317    | 0.053911667 | 341.543327  |
| 19 | E05 | 29172 | CG2819         | 17.04901333 | 0.056046333 | 304.1949815 |
| 19 | E06 | 27047 | CG8759         | 16.88105667 | 0.051103333 | 330.3318114 |
| 19 | E07 | 29197 | CG18628        | 17.74751    | 0.054164333 | 327.6604531 |
| 19 | E08 | 27051 | CG8950         | 14.48163    | 0.048794667 | 296.7871489 |
| 19 | E09 | 29156 | CG2044         | 18.76608    | 0.057649    | 325.5230793 |
| 19 | E10 | 27052 | CG8968         | 20.09226667 | 0.055162333 | 364.2388828 |
| 19 | E11 | 29131 | CG1927         | 19.08679667 | 0.048396667 | 394.3824644 |

|    |     |       |                 |             |             |             |
|----|-----|-------|-----------------|-------------|-------------|-------------|
| 19 | E12 | 27041 | CG14001         | 16.48498    | 0.049048    | 336.0989235 |
| 19 | E13 | 29196 | CG2851          | 17.46367    | 0.047462333 | 367.9479868 |
| 19 | E14 | 27045 | CG9131          | 15.33745    | 0.043403667 | 353.367611  |
| 19 | E15 | 18633 | CG31075         | 19.01019667 | 0.04523     | 420.3006117 |
| 19 | E16 | 27098 | CG8939          | 11.89603    | 0.047828    | 248.7252237 |
| 19 | E17 | 18637 | CG6339          | 22.98422667 | 0.046830667 | 490.7943513 |
| 19 | E18 | 16477 | CG11922         | 19.80471667 | 0.043923    | 450.8962654 |
| 19 | E19 | 18638 | CG6361          | 17.07278333 | 0.049674    | 343.6965683 |
| 19 | E20 | 16534 | CG11843         | 17.22482333 | 0.042343    | 406.7927009 |
| 19 | E21 | 18641 | CG6459          | 23.36739    | 0.048738667 | 479.4425371 |
| 19 | E22 | 16476 | CG11898         | 16.87850333 | 0.040782    | 413.8713975 |
| 19 | E23 | 18639 | CG6398          | 18.72015333 | 0.047871333 | 391.0514295 |
| 19 | E24 | 16455 | CG11600         | 18.07328667 | 0.036194    | 499.344827  |
| 19 | F01 | 16458 | CG12821         | 16.18738667 | 0.063083    | 256.6045792 |
| 19 | F02 | 23080 | CG9638          | 20.41588333 | 0.058069333 | 351.5777117 |
| 19 | F03 | 16456 | CG12028         | 14.09017    | 0.059554333 | 236.5935308 |
| 19 | F04 | 21373 | CG13363,CG16982 | 8.476975333 | 0.044192667 | 191.8185974 |
| 19 | F05 | 16481 | CG12780         | 16.18202667 | 0.051562    | 313.8362877 |
| 19 | F06 | 21398 | CG17124         | 14.18084667 | 0.0678      | 209.1570305 |
| 19 | F07 | 23013 | CG6233,CG7636   | 6.139141667 | 0.058691667 | 104.5998864 |
| 19 | F08 | 21392 | CG17549         | 13.06817667 | 0.046437    | 281.4173324 |
| 19 | F09 | 23017 | CG6023          | 13.00636667 | 0.051809667 | 251.0413115 |
| 19 | F10 | 21375 | CG17046,CG17180 | 15.69952333 | 0.054773667 | 286.6253857 |
| 19 | F11 | 23026 | CG9362          | 18.43609    | 0.059077    | 312.0688254 |
| 19 | F12 | 31138 | CG14440,CG32741 | 11.50059    | 0.052491333 | 219.0950252 |
| 19 | F13 | 23022 | CG6147          | 19.59063667 | 0.064191333 | 305.1913031 |
| 19 | F14 | 31187 | CG14616         | 15.79536667 | 0.047035667 | 335.8167915 |
| 19 | F15 | 23023 | CG6181          | 16.64229    | 0.052202333 | 318.8035656 |
| 19 | F16 | 31151 | CG17596         | 17.33677667 | 0.052314667 | 331.3941916 |
| 19 | F17 | 23021 | CG6098          | 16.25461    | 0.055484    | 292.9603129 |
| 19 | F18 | 31133 | CG32700         | 15.36129    | 0.042973333 | 357.4609836 |
| 19 | F19 | 23028 | CG9451          | 14.01092333 | 0.044200667 | 316.9844346 |
| 19 | F20 | 31144 | CG15307         | 14.69945667 | 0.043758333 | 335.9235955 |
| 19 | F21 | 23019 | CG9539          | 6.181127667 | 0.045976333 | 134.4415098 |
| 19 | F22 | 31141 | CG14811         | 13.09243    | 0.043650667 | 299.9365416 |
| 19 | F23 | 23027 | CG9399          | 16.77179667 | 0.042771333 | 392.1270477 |
| 19 | F24 | 31147 | CG15342         | 13.57446    | 0.040435333 | 335.7078792 |
| 19 | G01 | 29152 | CG18777         | 18.03714    | 0.054982667 | 328.0513859 |
| 19 | G02 | 27060 | CG8814          | 21.16167667 | 0.059993    | 352.7357636 |
| 19 | G03 | 29147 | CG2530          | 15.55600333 | 0.061975333 | 251.003141  |
| 19 | G04 | 27061 | CG8870          | 17.37314    | 0.051673    | 336.2131094 |
| 19 | G05 | 29153 | CG18808         | 14.73535667 | 0.054678333 | 269.4916938 |
| 19 | G06 | 27059 | CG8780          | 20.08092333 | 0.055548    | 361.5057848 |
| 19 | G07 | 29166 | CG18870         | 14.7146     | 0.052145667 | 282.1826039 |
| 19 | G08 | 27063 | CG31090         | 16.47709667 | 0.057997333 | 284.1009357 |
| 19 | G09 | 29168 | CG2078          | 15.48200667 | 0.054253    | 285.3668307 |
| 19 | G10 | 27064 | CG33145         | 17.59792667 | 0.054517    | 322.797048  |
| 19 | G11 | 29143 | CG1945          | 13.38086667 | 0.049649333 | 269.5074791 |
| 19 | G12 | 27042 | CG9045          | 3.440828333 | 0.042116333 | 81.6981931  |
| 19 | G13 | 18616 | CG6415          | 15.95303333 | 0.054747    | 291.3955711 |
| 19 | G14 | 27057 | CG9143          | 13.62389333 | 0.053535    | 254.4857258 |
| 19 | G15 | 18645 | CG6315          | 21.69157333 | 0.047499667 | 456.6679064 |
| 19 | G16 | 27055 | CG14232         | 16.87285667 | 0.055759333 | 302.6014778 |
| 19 | G17 | 18649 | CG6341          | 18.33582333 | 0.049776333 | 368.3642829 |

|    |     |       |               |             |             |             |
|----|-----|-------|---------------|-------------|-------------|-------------|
| 19 | G18 | 16489 | CG11951       | 16.82017667 | 0.048532    | 346.5790956 |
| 19 | G19 | 18650 | CG6363        | 16.53447667 | 0.040902    | 404.2461656 |
| 19 | G20 | 16483 | CG11678       | 22.2374     | 0.045785667 | 485.6847485 |
| 19 | G21 | 18676 | CG6432        | 17.53654667 | 0.041458333 | 422.9920804 |
| 19 | G22 | 16523 | CG11874       | 19.55533    | 0.046352    | 421.8875129 |
| 19 | G23 | 18651 | CG31132       | 6.185161667 | 0.041456667 | 149.195827  |
| 19 | G24 | 16486 | CG11828       | 18.24569667 | 0.043766333 | 416.8888567 |
| 19 | H01 | 16470 | CG12831       | 17.16592667 | 0.060680333 | 282.8911069 |
| 19 | H02 | 21396 | CG33126       | 16.53175667 | 0.057073    | 289.6598508 |
| 19 | H03 | 16468 | CG32281       | 14.7966     | 0.06159     | 240.243546  |
| 19 | H04 | 21381 | CG15365       | 16.20420333 | 0.054778667 | 295.8122992 |
| 19 | H05 | 16505 | CG12800       | 14.84188    | 0.059029    | 251.4337021 |
| 19 | H06 | 21367 | CG17360       | 15.74277    | 0.056655    | 277.8707969 |
| 19 | H07 | 23036 | CG6218        | 15.58093    | 0.048006667 | 324.5576309 |
| 19 | H08 | 21459 | CG17252       | 9.244061    | 0.046501    | 198.7927356 |
| 19 | H09 | 23029 | CG6028        | 10.61809333 | 0.044876    | 236.6096206 |
| 19 | H10 | 21407 | CG15452       | 19.24582667 | 0.051816667 | 371.4215503 |
| 19 | H11 | 23038 | CG9363        | 17.09512667 | 0.055433667 | 308.3888852 |
| 19 | H12 | 31183 | CG12665       | 16.22653    | 0.051031333 | 317.9718996 |
| 19 | H13 | 23034 | CG6155        | 16.51050667 | 0.045548667 | 362.4805702 |
| 19 | H14 | 31166 | CG15047       | 15.12992333 | 0.048819667 | 309.9145153 |
| 19 | H15 | 23035 | CG6187        | 16.84420667 | 0.051104333 | 329.6042736 |
| 19 | H16 | 31160 | CG12684       | 16.68209    | 0.044765333 | 372.6564455 |
| 19 | H17 | 23033 | CG14869       | 14.59402667 | 0.050524667 | 288.8495388 |
| 19 | H18 | 31145 | CG15323       | 14.77039    | 0.044017    | 335.5610332 |
| 19 | H19 | 23040 | CG9461        | 12.51878667 | 0.039321667 | 318.3686687 |
| 19 | H20 | 31158 | CG14410       | 16.97953    | 0.043471333 | 390.5914242 |
| 19 | H21 | 23031 | CG9541        | 15.12294333 | 0.048154667 | 314.0493825 |
| 19 | H22 | 31153 | CG14814       | 8.655902667 | 0.046582667 | 185.8181012 |
| 19 | H23 | 23039 | CG9400        | 17.93052333 | 0.038500667 | 465.7198144 |
| 19 | H24 | 31159 | CG12660       | 18.38752    | 0.040406    | 455.0690492 |
| 19 | I01 | 29164 | CG18778       | 18.07873    | 0.066625667 | 271.3478289 |
| 19 | I02 | 27072 | CG8823        | 15.76047333 | 0.052345667 | 301.0845852 |
| 19 | I03 | 29163 | CG18746       | 15.62856    | 0.059938667 | 260.7425368 |
| 19 | I04 | 27073 | CG8873        | 17.76263667 | 0.062272333 | 285.2412254 |
| 19 | I05 | 29165 | CG18810       | 15.31137667 | 0.056740667 | 269.8483745 |
| 19 | I06 | 27071 | CG8070,CG8781 | 8.791577333 | 0.075024333 | 117.1830117 |
| 19 | I07 | 29158 | CG2211        | 14.69647667 | 0.057956    | 253.5798997 |
| 19 | I08 | 27075 | CG8957        | 14.86495667 | 0.053303667 | 278.8730606 |
| 19 | I09 | 29124 | CG2665        | 14.99836667 | 0.057940667 | 258.8573368 |
| 19 | I10 | 27022 | CG9172        | 15.32992667 | 0.055964667 | 273.9215219 |
| 19 | I11 | 29174 | CG18681       | 16.24068667 | 0.050328667 | 322.6925675 |
| 19 | I12 | 27068 | CG9107        | 9.682244    | 0.065413667 | 148.0156135 |
| 19 | I13 | 18628 | CG6417        | 14.91868333 | 0.051947333 | 287.1886269 |
| 19 | I14 | 27074 | CG8925        | 12.74306667 | 0.046651333 | 273.1554654 |
| 19 | I15 | 18657 | CG6321        | 13.86539667 | 0.055834667 | 248.3295324 |
| 19 | I16 | 27067 | CG14290       | 16.44638667 | 0.048991667 | 335.6976357 |
| 19 | I17 | 18661 | CG6342        | 15.06926    | 0.046969    | 320.8341672 |
| 19 | I18 | 16501 | CG11952       | 13.47264667 | 0.047313667 | 284.7516926 |
| 19 | I19 | 18662 | CG6364        | 12.289009   | 0.051529333 | 238.4856975 |
| 19 | I20 | 16495 | CG11679       | 9.089513    | 0.042344667 | 214.6554387 |
| 19 | I21 | 18688 | CG6440        | 15.41469    | 0.054384    | 283.4416372 |
| 19 | I22 | 16500 | CG11909       | 16.02957333 | 0.051053333 | 313.9770175 |
| 19 | I23 | 18663 | CG6401        | 16.49783333 | 0.047455    | 347.6521617 |

|    |     |       |                 |             |             |             |
|----|-----|-------|-----------------|-------------|-------------|-------------|
| 19 | I24 | 16479 | CG11611         | 13.21308333 | 0.042612333 | 310.0765037 |
| 19 | J01 | 16482 | CG12833         | 13.5275     | 0.059634    | 226.84207   |
| 19 | J02 | 21408 | CG16952         | 13.86496333 | 0.060357667 | 229.7133753 |
| 19 | J03 | 16513 | CG11966         | 12.91146    | 0.059642    | 216.48268   |
| 19 | J04 | 21397 | CG16991         | 14.85332667 | 0.055027    | 269.9279748 |
| 19 | J05 | 16502 | CG11994         | 12.85911967 | 0.058151333 | 221.1319832 |
| 19 | J06 | 21448 | CG17279,CG3671  | 12.33612    | 0.054709333 | 225.4847436 |
| 19 | J07 | 23048 | CG6219          | 18.19881667 | 0.062443    | 291.4468662 |
| 19 | J08 | 21406 | CG15435         | 13.89312333 | 0.053157333 | 261.3585457 |
| 19 | J09 | 23041 | CG6041          | 13.6797     | 0.058477    | 233.9329993 |
| 19 | J10 | 21427 | CG17446         | 9.258082    | 0.070327333 | 131.6427278 |
| 19 | J11 | 23050 | CG9364          | 14.22233    | 0.051204667 | 277.7545666 |
| 19 | J12 | 31162 | CG14444         | 16.09144667 | 0.057853333 | 278.1420834 |
| 19 | J13 | 23046 | CG6157          | 12.97516333 | 0.051493    | 251.9791687 |
| 19 | J14 | 31178 | CG15048,CG6481  | 13.69301667 | 0.047333    | 289.2911218 |
| 19 | J15 | 23047 | CG6199          | 13.65290667 | 0.057403667 | 237.8403238 |
| 19 | J16 | 31172 | CG12685         | 11.87324333 | 0.050101667 | 236.9830012 |
| 19 | J17 | 23030 | CG9527          | 15.58289667 | 0.051129333 | 304.7741023 |
| 19 | J18 | 31173 | CG12701         | 16.16941667 | 0.048438667 | 333.8121748 |
| 19 | J19 | 23052 | CG9471          | 16.95394    | 0.049444667 | 342.8871331 |
| 19 | J20 | 31170 | CG14427         | 15.14013333 | 0.049563667 | 305.4683875 |
| 19 | J21 | 23044 | CG31150         | 13.02283333 | 0.04521     | 288.0520534 |
| 19 | J22 | 31176 | CG14788         | 13.96099    | 0.04824     | 289.4069237 |
| 19 | J23 | 23051 | CG9411          | 14.71626667 | 0.045123333 | 326.1342986 |
| 19 | J24 | 31171 | CG12664         | 14.46881333 | 0.041325    | 350.1225247 |
| 19 | K02 | 27084 | CG8834          | 16.22835333 | 0.059603    | 272.2741025 |
| 19 | K03 | 29175 | CG18747         | 11.37233667 | 0.054913333 | 207.0960908 |
| 19 | K04 | 27102 | CG9084          | 12.84844667 | 0.064501    | 199.1976352 |
| 19 | K05 | 29177 | CG18811         | 11.08794567 | 0.059668667 | 185.8252628 |
| 19 | K06 | 27083 | CG8785          | 13.38181667 | 0.051103333 | 261.8580001 |
| 19 | K07 | 29170 | CG2241          | 12.91723    | 0.060161667 | 214.7086461 |
| 19 | K08 | 27094 | CG9215          | 13.74309333 | 0.051736    | 265.6388846 |
| 19 | K09 | 29136 | CG2682          | 14.65125    | 0.060027667 | 244.0749543 |
| 19 | K1  | 29176 | CG1878          | 11.430645   | 0.061049333 | 187.236197  |
| 19 | K10 | 27062 | CG8916          | 13.80419    | 0.052788    | 261.5024248 |
| 19 | K11 | 29167 | CG1963          | 1.965377667 | 0.045906667 | 42.81246733 |
| 19 | K12 | 27080 | CG9109          | 10.61473033 | 0.052636667 | 201.6603825 |
| 19 | K13 | 18640 | CG6420          | 12.85904    | 0.044077667 | 291.7359509 |
| 19 | K14 | 27081 | CG9151          | 12.38274333 | 0.057667    | 214.728412  |
| 19 | K15 | 18669 | CG6323          | 14.13076667 | 0.048187333 | 293.2464963 |
| 19 | K16 | 27079 | CG14299         | 13.2543     | 0.054128667 | 244.8665525 |
| 19 | K17 | 18673 | CG6343          | 10.755082   | 0.054223667 | 198.3466383 |
| 19 | K18 | 16463 | CG11847         | 13.29507333 | 0.053425    | 248.8549056 |
| 19 | K19 | 18674 | CG6375          | 7.155091333 | 0.058899333 | 121.4800054 |
| 19 | K20 | 16507 | CG30272         | 12.602797   | 0.047782667 | 263.7524835 |
| 19 | K21 | 18700 | CG6443          | 11.36448    | 0.049721333 | 228.5634604 |
| 19 | K22 | 16512 | CG11910         | 13.64964667 | 0.046318333 | 294.6920946 |
| 19 | K23 | 18675 | CG6409          | 13.58008333 | 0.045776    | 296.6638268 |
| 19 | K24 | 16510 | CG11838         | 12.4005     | 0.046919333 | 264.2940366 |
| 19 | L01 | 16445 | CG12770         | 13.69884333 | 0.140901667 | 97.22272034 |
| 19 | L02 | 21420 | CG16953         | 15.90880667 | 0.058839    | 270.3786038 |
| 19 | L03 | 16492 | CG12717         | 11.615028   | 0.060408333 | 192.27526   |
| 19 | L04 | 21425 | CG15312,CG32693 | 14.21979333 | 0.062670667 | 226.897113  |
| 19 | L05 | 16514 | CG12010         | 11.37213233 | 0.058365667 | 194.8428414 |

|    |     |       |               |             |             |             |
|----|-----|-------|---------------|-------------|-------------|-------------|
| 19 | L06 | 21434 | CG17147       | 10.45048267 | 0.057947    | 180.3455341 |
| 19 | L07 | 23060 | CG6222        | 9.510142333 | 0.055757333 | 170.5630769 |
| 19 | L08 | 21428 | CG17600       | 14.55193333 | 0.062138667 | 234.1848339 |
| 19 | L09 | 23053 | CG6049        | 10.83265667 | 0.063748    | 169.9293573 |
| 19 | L10 | 21411 | CG17211       | 12.97536333 | 0.054392333 | 238.5513277 |
| 19 | L11 | 23062 | CG32145       | 13.87416    | 0.050338    | 275.6200087 |
| 19 | L12 | 31174 | CG12543       | 11.86738733 | 0.048352667 | 245.4339781 |
| 19 | L13 | 23025 | CG6236        | 11.43492    | 0.057793    | 197.8599484 |
| 19 | L14 | 31190 | CG15049       | 10.869146   | 0.046014    | 236.2138914 |
| 19 | L15 | 23073 | CG9354        | 1.521878    | 0.042794667 | 35.56232864 |
| 19 | L16 | 31184 | CG12689       | 12.38669    | 0.048256667 | 256.683498  |
| 19 | L17 | 23057 | CG6122        | 12.96764667 | 0.048135    | 269.4016135 |
| 19 | L18 | 31185 | CG12703       | 14.75935667 | 0.049455    | 298.4401308 |
| 19 | L19 | 23064 | CG9473        | 9.615137667 | 0.044326333 | 216.9170546 |
| 19 | L20 | 31180 | CG15312       | 13.83256    | 0.043231333 | 319.966074  |
| 19 | L21 | 23055 | CG9547        | 14.45338667 | 0.0497      | 290.812609  |
| 19 | L22 | 31177 | CG14818       | 9.694410667 | 0.049215    | 196.9808121 |
| 19 | L23 | 23056 | CG9629,CG9666 | 13.35451333 | 0.048473333 | 275.5022693 |
| 19 | L24 | 31191 | CG15224       | 11.31386733 | 0.048254333 | 234.4632399 |
| 19 | M01 | 29188 | CG18780       | 15.77543333 | 0.060220667 | 261.9604565 |
| 19 | M02 | 27096 | CG8837        | 13.47218667 | 0.063976    | 210.5818849 |
| 19 | M03 | 29187 | CG18748       | 13.06067667 | 0.055917333 | 233.5711646 |
| 19 | M04 | 27097 | CG8891        | 12.82727    | 0.060953    | 210.4452611 |
| 19 | M05 | 29189 | CG18812       | 11.10667333 | 0.052339    | 212.206449  |
| 19 | M06 | 27095 | CG8795        | 13.04216    | 0.051624    | 252.6375329 |
| 19 | M07 | 29182 | CG2291        | 13.60799333 | 0.056693333 | 240.0281044 |
| 19 | M08 | 27099 | CG8962        | 15.8892     | 0.054809667 | 289.8977674 |
| 19 | M09 | 29204 | CG2127        | 15.48562    | 0.056145667 | 275.8114903 |
| 19 | M10 | 27046 | CG9194        | 12.00215333 | 0.049511    | 242.4138744 |
| 19 | M11 | 29198 | CG18731       | 15.11623333 | 0.051842667 | 291.5790083 |
| 19 | M12 | 27092 | CG9114        | 15.68017667 | 0.051755333 | 302.9673592 |
| 19 | M13 | 18652 | CG6422        | 13.09835333 | 0.047300667 | 276.9168863 |
| 19 | M14 | 27086 | CG8930        | 13.29329333 | 0.053798    | 247.0964224 |
| 19 | M15 | 18681 | CG6327        | 12.76974    | 0.049339667 | 258.8128551 |
| 19 | M16 | 27110 | CG8942        | 14.21721333 | 0.040906667 | 347.5524772 |
| 19 | M17 | 18685 | CG6347        | 17.06795667 | 0.045335667 | 376.4796665 |
| 19 | M18 | 16527 | CG11638       | 14.42990333 | 0.047588667 | 303.2214253 |
| 19 | M19 | 18686 | CG31072       | 12.31668    | 0.043558    | 282.7650489 |
| 19 | M20 | 16519 | CG11703       | 11.62649    | 0.047846667 | 242.994775  |
| 19 | M21 | 18699 | CG6413        | 4.255091    | 0.042197333 | 100.8379123 |
| 19 | M22 | 16524 | CG11911       | 15.87526667 | 0.047674667 | 332.9916657 |
| 19 | M23 | 18687 | CG6412        | 14.32513333 | 0.043515    | 329.1998928 |
| 19 | M24 | 16522 | CG11841       | 15.55231333 | 0.048652667 | 319.6600392 |
| 19 | N01 | 16457 | CG12772       | 17.27586333 | 0.073302667 | 235.678511  |
| 19 | N02 | 21441 | CG15415       | 8.864254    | 0.068501    | 129.4032788 |
| 19 | N03 | 16504 | CG12743       | 13.80558    | 0.066752667 | 206.8169062 |
| 19 | N04 | 21437 | CG15329       | 12.98428667 | 0.05746     | 225.9708783 |
| 19 | N05 | 16526 | CG12014       | 11.01555533 | 0.053109667 | 207.4114945 |
| 19 | N06 | 21403 | CG17383       | 11.63249    | 0.055788333 | 208.5111582 |
| 19 | N07 | 23072 | CG6226        | 11.68324567 | 0.064214667 | 181.9404549 |
| 19 | N08 | 21430 | CG15438       | 12.86880333 | 0.054881    | 234.485584  |
| 19 | N09 | 23065 | CG6057        | 16.47184    | 0.055653667 | 295.9704362 |
| 19 | N10 | 21451 | CG17472       | 8.584183667 | 0.039950667 | 214.8695975 |
| 19 | N11 | 23074 | CG9377        | 13.06146333 | 0.051783333 | 252.2329578 |

|    |     |       |                 |             |             |             |
|----|-----|-------|-----------------|-------------|-------------|-------------|
| 19 | N12 | 31169 | CG15330         | 16.04550667 | 0.053888333 | 297.7547397 |
| 19 | N13 | 23070 | CG6170          | 13.43732    | 0.057059    | 235.4986943 |
| 19 | N14 | 31202 | CG15060         | 12.60797333 | 0.046812333 | 269.3301623 |
| 19 | N15 | 23071 | CG6202          | 14.78195    | 0.054843667 | 269.5288426 |
| 19 | N16 | 31201 | CG15034         | 14.47535    | 0.04609     | 314.0670427 |
| 19 | N17 | 23054 | CG9531          | 14.15014667 | 0.051891667 | 272.6863016 |
| 19 | N18 | 31197 | CG15641         | 13.01013    | 0.047084    | 276.3174327 |
| 19 | N19 | 23020 | CG9609          | 13.71744    | 0.046137333 | 297.3175736 |
| 19 | N20 | 31192 | CG15314         | 12.52696667 | 0.043054    | 290.9594153 |
| 19 | N21 | 23085 | CG9356          | 14.36945667 | 0.044919    | 319.897074  |
| 19 | N22 | 31200 | CG14794         | 13.01957333 | 0.036632    | 355.4153017 |
| 19 | N23 | 23075 | CG9414          | 15.4186     | 0.042582    | 362.0919637 |
| 19 | N24 | 31203 | CG32674         | 15.68460667 | 0.043507667 | 360.5021337 |
| 19 | O01 | 29200 | CG18783         | 13.54677333 | 0.061952    | 218.6656336 |
| 19 | O02 | 27108 | CG8841          | 11.62491333 | 0.061549333 | 188.8714744 |
| 19 | O03 | 29199 | CG18754         | 10.92779967 | 0.072067667 | 151.6324889 |
| 19 | O04 | 27109 | CG8892          | 12.70607333 | 0.062085333 | 204.654991  |
| 19 | O05 | 29201 | CG18814         | 12.73788667 | 0.055460667 | 229.6742436 |
| 19 | O06 | 27050 | CG8915          | 12.83541    | 0.065832667 | 194.9702275 |
| 19 | O07 | 29194 | CG2342          | 12.47408333 | 0.058254    | 214.132649  |
| 19 | O08 | 27111 | CG8963          | 9.801870333 | 0.061605667 | 159.1066352 |
| 19 | O09 | 29160 | CG2816          | 12.81051667 | 0.062310667 | 205.5910705 |
| 19 | O10 | 27112 | CG9006          | 12.10069333 | 0.060749667 | 199.1894606 |
| 19 | O11 | 29203 | CG1976          | 13.6793     | 0.057373667 | 238.4247128 |
| 19 | O12 | 27104 | CG9117          | 12.43139233 | 0.059748333 | 208.0625792 |
| 19 | O13 | 18664 | CG6424          | 14.59028333 | 0.06029     | 242.0017139 |
| 19 | O14 | 27105 | CG9164          | 14.73486333 | 0.052673667 | 279.7387056 |
| 19 | O15 | 18693 | CG6330          | 14.41966    | 0.057963333 | 248.7720973 |
| 19 | O16 | 27103 | CG8719          | 11.66568333 | 0.045992333 | 253.6440856 |
| 19 | O17 | 18697 | CG6349          | 10.321156   | 0.06068     | 170.0915623 |
| 19 | O18 | 16487 | CG11854         | 13.26943    | 0.051320333 | 258.5608693 |
| 19 | O19 | 18698 | CG6391          | 13.66515333 | 0.048022    | 284.560271  |
| 19 | O20 | 16536 | CG11912         | 12.88869333 | 0.047176    | 273.2044542 |
| 19 | O21 |       | wts             | 66.65217667 | 0.040939    | 1628.085119 |
| 19 | O22 |       | HFA17794        | 1.530998    | 0.017509333 | 87.43896588 |
| 19 | O23 |       | hpo             | 44.51357333 | 0.048175667 | 923.9845842 |
| 19 | O24 |       | Luc             | 2.667993    | 0.050631    | 52.69485098 |
| 19 | P01 | 16537 | CG11979         | 6.044833333 | 0.05211     | 116.0014073 |
| 19 | P02 | 21444 | CG16972         | 12.79814333 | 0.060226667 | 212.4996126 |
| 19 | P03 | 16516 | CG12763         | 12.60691    | 0.071565333 | 176.1594534 |
| 19 | P04 | 21429 | CG2991,CG31694  | 10.27271633 | 0.064308    | 159.7424323 |
| 19 | P05 | 16538 | CG12016         | 14.22807667 | 0.069264667 | 205.4160852 |
| 19 | P06 | 21447 | CG17233         | 12.85568667 | 0.071620667 | 179.4968864 |
| 19 | P07 | 23084 | CG6227          | 8.752861333 | 0.071690333 | 122.0926299 |
| 19 | P08 | 21442 | CG15442,CG33002 | 1.307640333 | 0.051711667 | 25.28714346 |
| 19 | P09 | 23077 | CG6070          | 13.86323    | 0.064631333 | 214.4970448 |
| 19 | P10 | 21455 | CG16914         | 11.05498667 | 0.069312    | 159.4959988 |
| 19 | P11 | 23086 | CG9381          | 14.17607667 | 0.063719    | 222.4780155 |
| 19 | P12 | 31181 | CG15332         | 12.52051    | 0.059191333 | 211.526068  |
| 19 | P13 | 23049 | CG32211         | 4.120144333 | 0.053675333 | 76.76047967 |
| 19 | P14 | 31214 | CG12611         | 14.55406333 | 0.056982667 | 255.4121136 |
| 19 | P15 | 23083 | CG6207          | 14.57215    | 0.053902667 | 270.3419126 |
| 19 | P16 | 31210 | CG12564         | 11.99442333 | 0.057551667 | 208.4113985 |
| 19 | P17 | 23081 | CG33047         | 14.52846333 | 0.056995333 | 254.9061912 |

|    |     |       |          |             |             |             |
|----|-----|-------|----------|-------------|-------------|-------------|
| 19 | P18 | 31211 | CG11663  | 12.89221    | 0.055539    | 232.1289544 |
| 19 | P19 | 23088 | CG9495   | 11.89156333 | 0.047645333 | 249.585059  |
| 19 | P20 | 31216 | CG32694  | 12.45113    | 0.046104667 | 270.0622497 |
| 19 | P21 |       | wts      | 52.58369    | 0.040072333 | 1312.21932  |
| 19 | P22 |       | HFA17794 | 1.174643333 | 0.017736667 | 66.22683706 |
| 19 | P23 |       | hpo      | 37.27642667 | 0.041754333 | 892.7558816 |
| 19 | P24 |       | Luc      | 1.861638    | 0.05252     | 35.44626809 |
| 20 | A01 |       | DIAP1    | 0.491054    | 0.021946667 | 22.37487849 |
| 20 | A02 |       | ex/ft    | 36.43579333 | 0.066656667 | 546.6188928 |
| 20 | A03 |       | Luc      | 1.757565667 | 0.067298    | 26.11616492 |
| 20 | A04 |       | hpo      | 30.43997    | 0.065000333 | 468.3048292 |
| 20 | A05 | 21656 | CG8607   | 9.408087333 | 0.050107333 | 187.7586913 |
| 20 | A06 | 21078 | CG7106   | 9.250696    | 0.057328667 | 161.362483  |
| 20 | A07 | 21661 | CG15003  | 10.640425   | 0.052247    | 203.6561908 |
| 20 | A08 | 21100 | CG7079   | 11.59790667 | 0.06263     | 185.1813295 |
| 20 | A09 | 21662 | CG15042  | 10.44775633 | 0.054997    | 189.969568  |
| 20 | A10 | 26929 | CG11853  | 7.806238667 | 0.053118667 | 146.9584829 |
| 20 | A11 | 21077 | CG18593  | 9.981442    | 0.055494667 | 179.8630859 |
| 20 | A12 | 26932 | CG11986  | 10.12442967 | 0.055489    | 182.4583191 |
| 20 | A13 | 21082 | CG6879   | 10.068879   | 0.059017667 | 170.6078801 |
| 20 | A14 | 26934 | CG12759  | 7.09685     | 0.053007    | 133.8851472 |
| 20 | A15 | 21083 | CG6914   | 9.934252    | 0.051335333 | 193.51685   |
| 20 | A16 | 26928 | CG11819  | 9.464069333 | 0.052777    | 179.3218511 |
| 20 | A17 | 21087 | CG7041   | 9.055012    | 0.056137667 | 161.3001134 |
| 20 | A18 | 26930 | CG11906  | 8.617591333 | 0.051239333 | 168.1831275 |
| 20 | A19 | 21081 | CG18657  | 9.572457    | 0.054321667 | 176.2180284 |
| 20 | A20 | 26931 | CG11961  | 10.01436133 | 0.050717    | 197.4557118 |
| 20 | A21 | 21088 | CG7072   | 8.977563333 | 0.051126    | 175.5968261 |
| 20 | A22 | 26924 | CG12908  | 9.058475667 | 0.049582667 | 182.6944026 |
| 20 | A23 | 21098 | CG7005   | 5.660022333 | 0.049683    | 113.9227167 |
| 20 | A24 | 26933 | CG12030  | 11.23228667 | 0.050250667 | 223.5251274 |
| 20 | B01 |       | DIAP1    | 0.530879333 | 0.022189667 | 23.92461957 |
| 20 | B02 |       | ex/ft    | 38.34640667 | 0.062568    | 612.8756979 |
| 20 | B03 |       | Luc      | 1.871401    | 0.067361    | 27.78166892 |
| 20 | B04 |       | hpo      | 28.81593667 | 0.055544667 | 518.7885426 |
| 20 | B05 | 27010 | CG14062  | 9.833900333 | 0.066916667 | 146.9574147 |
| 20 | B06 | 20895 | CG17142  | 9.570435    | 0.062251    | 153.739458  |
| 20 | B07 | 20986 | CG17657  | 12.05839333 | 0.057833667 | 208.5012766 |
| 20 | B08 | 20897 | CG31860  | 10.184346   | 0.064836    | 157.0785675 |
| 20 | B09 | 20993 | CG18292  | 11.29692267 | 0.060114333 | 187.9239449 |
| 20 | B10 | 20896 | CG17187  | 8.747163667 | 0.061108667 | 143.1411311 |
| 20 | B11 | 20985 | CG18516  | 9.913238    | 0.059757333 | 165.8915726 |
| 20 | B12 | 20898 | CG17282  | 9.608552667 | 0.057793667 | 166.2561526 |
| 20 | B13 | 20987 | CG17716  | 9.986189    | 0.057854    | 172.6101739 |
| 20 | B14 | 20973 | CG17592  | 9.659233333 | 0.052365    | 184.4597218 |
| 20 | B15 | 20990 | CG32799  | 10.73338667 | 0.056173333 | 191.0761927 |
| 20 | B16 | 26160 | CG31323  | 9.049651333 | 0.050144    | 180.4732637 |
| 20 | B17 | 20992 | CG18208  | 11.336217   | 0.056400333 | 200.9955674 |
| 20 | B18 | 26155 | CG14526  | 10.92125933 | 0.052094333 | 209.6439024 |
| 20 | B19 | 20891 | CG16954  | 11.36195    | 0.053023667 | 214.28073   |
| 20 | B20 | 26161 | CG14568  | 7.478872333 | 0.064893667 | 115.2481084 |
| 20 | B21 | 20893 | CG17031  | 10.52273    | 0.053569    | 196.4331983 |
| 20 | B22 | NA    | NA       | 11.126589   | 0.047899    | 232.2927201 |
| 20 | B23 | 20887 | CG16898  | 9.976346333 | 0.050186333 | 198.7861171 |



|    |     |       |                 |             |             |             |
|----|-----|-------|-----------------|-------------|-------------|-------------|
| 20 | B24 | 24817 | CG11086         | 11.68386667 | 0.051903333 | 225.108214  |
| 20 | C01 | 21669 | CG8644          | 10.846236   | 0.053802    | 201.5954054 |
| 20 | C02 | 21079 | CG7147          | 10.582602   | 0.052596667 | 201.2029026 |
| 20 | C03 | 21672 | CG14973         | 9.323230667 | 0.053983    | 172.7067904 |
| 20 | C04 | 21080 | CG7183          | 11.31671267 | 0.052983667 | 213.5887034 |
| 20 | C05 | 21687 | CG15084         | 8.372028333 | 0.041375333 | 202.3434655 |
| 20 | C06 | 21090 | CG32356         | 13.31780033 | 0.053337    | 249.69159   |
| 20 | C07 | 21673 | CG15022         | 12.79712333 | 0.049106667 | 260.5984931 |
| 20 | C08 | 21112 | CG7083          | 14.77093667 | 0.053581333 | 275.6731822 |
| 20 | C09 | 21667 | CG10385,CG31751 | 13.4361     | 0.051606333 | 260.3575789 |
| 20 | C10 | 26941 | CG11857         | 10.60205567 | 0.054274333 | 195.3419787 |
| 20 | C11 | 21089 | CG18596         | 12.86431    | 0.056651667 | 227.077344  |
| 20 | C12 | 26944 | CG11990         | 7.488032667 | 0.045532333 | 164.4552809 |
| 20 | C13 | 21094 | CG32540         | 14.57534333 | 0.051469667 | 283.1831694 |
| 20 | C14 | 26946 | CG12773         | 12.56565667 | 0.052094333 | 241.2096645 |
| 20 | C15 | 21095 | CG6915          | 14.48936667 | 0.05135     | 282.1687764 |
| 20 | C16 | 26940 | CG11820         | 11.84559333 | 0.049425667 | 239.6648165 |
| 20 | C17 | 21156 | CG6969          | 14.33420333 | 0.049637    | 288.7806139 |
| 20 | C18 | 26942 | CG11907         | 13.31097    | 0.049949667 | 266.4876642 |
| 20 | C19 | 21093 | CG18672         | 14.94191667 | 0.045604    | 327.6448703 |
| 20 | C20 | 26943 | CG11963         | 13.25519667 | 0.050391333 | 263.0451665 |
| 20 | C21 | 21085 | CG6978          | 13.61346667 | 0.049769    | 273.5330561 |
| 20 | C22 | 26936 | CG12935         | 13.08448    | 0.048987667 | 267.0974327 |
| 20 | C23 | 21110 | CG7009          | 13.91201    | 0.049921    | 278.6805152 |
| 20 | C24 | 26945 | CG12031         | 4.68413     | 0.035980333 | 130.1858423 |
| 20 | D01 | 26925 | CG30038,CG8981  | 13.54497433 | 0.055438333 | 244.3250639 |
| 20 | D02 | 20900 | CG17359         | 9.691465667 | 0.053697    | 180.4843039 |
| 20 | D03 | 26926 | CG13852         | 28.43764    | 0.054137333 | 525.2870478 |
| 20 | D04 | 20901 | CG17453         | 11.81591    | 0.056124667 | 210.5297136 |
| 20 | D05 | 20994 | CG17599         | 9.512026667 | 0.057661    | 164.9646497 |
| 20 | D06 | 20907 | CG16940,CG17143 | 12.863438   | 0.063378667 | 202.961638  |
| 20 | D07 | 20998 | CG17161         | 9.671869333 | 0.061883667 | 156.2911484 |
| 20 | D08 | 20909 | CG17219         | 9.294044333 | 0.047975667 | 193.724131  |
| 20 | D09 | 21005 | CG18296         | 11.93318067 | 0.058556667 | 203.7885922 |
| 20 | D10 | 20908 | CG17190         | 10.10079833 | 0.054155333 | 186.5153017 |
| 20 | D11 | 20997 | CG18519         | 12.16649667 | 0.049457    | 246.0015097 |
| 20 | D12 | 20910 | CG17283         | 11.39327667 | 0.061318667 | 185.8043771 |
| 20 | D13 | 20999 | CG17735         | 13.02983333 | 0.043534    | 299.3024609 |
| 20 | D14 | 26175 | CG14627         | 10.701114   | 0.046796333 | 228.6741981 |
| 20 | D15 | 20988 | CG17803         | 10.73895567 | 0.046255333 | 232.1668636 |
| 20 | D16 | 26172 | CG14559         | 11.29111    | 0.045131333 | 250.1833907 |
| 20 | D17 | 21056 | CG18480         | 12.51315333 | 0.059403    | 210.6485082 |
| 20 | D18 | 26167 | CG14527         | 12.5531     | 0.051049667 | 245.8997447 |
| 20 | D19 | 20963 | CG17024         | 12.68009    | 0.046828333 | 270.7781614 |
| 20 | D20 | 26173 | CG14569         | 11.90421    | 0.044301333 | 268.7099711 |
| 20 | D21 | 20905 | CG17036         | 12.74293    | 0.052013    | 244.9950974 |
| 20 | D22 | 26157 | CG14754         | 11.24644333 | 0.045544333 | 246.9339764 |
| 20 | D23 | 20899 | CG16899         | 13.26932667 | 0.047999333 | 276.4481451 |
| 20 | D24 | 24813 | CG11035         | 17.78927667 | 0.050091333 | 355.1368167 |
| 20 | E01 | 21681 | CG8660          | 21.05315    | 0.062649    | 336.0492586 |
| 20 | E02 | 21091 | CG32447         | 17.88373667 | 0.059188    | 302.1513933 |
| 20 | E03 | 21670 | CG14916         | 13.60599    | 0.056969    | 238.8314697 |
| 20 | E04 | 21092 | CG7189          | 15.23435333 | 0.052398667 | 290.7393318 |
| 20 | E05 | 21695 | CG14956         | 14.24134    | 0.057907333 | 245.9332727 |

|    |     |       |                 |             |             |             |
|----|-----|-------|-----------------|-------------|-------------|-------------|
| 20 | E06 | 21102 | CG31235         | 14.80497    | 0.050278667 | 294.4582858 |
| 20 | E07 | 21677 | CG15127         | 14.75934    | 0.056743333 | 260.1070317 |
| 20 | E08 | 21172 | CG7099          | 16.45776667 | 0.058186333 | 282.8459146 |
| 20 | E09 | 21679 | CG15167         | 14.13062667 | 0.044193    | 319.7480747 |
| 20 | E10 | 26953 | CG11864         | 15.69064333 | 0.054941667 | 285.5873199 |
| 20 | E11 | 21101 | CG1128          | 14.74973    | 0.058908333 | 250.3844391 |
| 20 | E12 | 26956 | CG11999         | 14.61348667 | 0.056382333 | 259.1855605 |
| 20 | E13 | 21106 | CG6885          | 18.65892333 | 0.061851333 | 301.6737446 |
| 20 | E14 | 26958 | CG12782         | 15.96122    | 0.048863667 | 326.6480207 |
| 20 | E15 | 21107 | CG6920          | 17.26488    | 0.052699333 | 327.6109755 |
| 20 | E16 | 26952 | CG11836         | 16.64759333 | 0.046591667 | 357.3083885 |
| 20 | E17 | 21111 | CG7047          | 17.42729333 | 0.048528    | 359.1183097 |
| 20 | E18 | 27007 | CG11723         | 14.92573333 | 0.046934333 | 318.0131105 |
| 20 | E19 | 21105 | CG18673         | 15.74410667 | 0.046970667 | 335.1901896 |
| 20 | E20 | 26955 | CG11967         | 16.97104    | 0.052547667 | 322.9646733 |
| 20 | E21 | 21097 | CG6989          | 16.75826667 | 0.046826    | 357.8837968 |
| 20 | E22 | 26948 | CG30020         | 13.09885333 | 0.055792333 | 234.778733  |
| 20 | E23 | 21122 | CG32346         | 23.85739333 | 0.050508667 | 472.3425683 |
| 20 | E24 | 27017 | CG12753         | 15.22674    | 0.043929333 | 346.6189638 |
| 20 | F01 | 26937 | CG13185         | 8.483552    | 0.064374    | 131.7853792 |
| 20 | F02 | 20912 | CG17380         | 14.12411667 | 0.062763667 | 225.0365126 |
| 20 | F03 | 27009 | CG13850         | 16.19818333 | 0.061818667 | 262.0273812 |
| 20 | F04 | 20913 | CG17461         | 15.66381333 | 0.058450667 | 267.9834846 |
| 20 | F05 | 21006 | CG17611         | 7.412419    | 0.059707333 | 124.1458726 |
| 20 | F06 | 20919 | CG17145         | 13.19650333 | 0.058240667 | 226.585719  |
| 20 | F07 | 21007 | CG18363         | 13.03282    | 0.052655667 | 247.5103028 |
| 20 | F08 | 20921 | CG17227         | 11.03387    | 0.053162667 | 207.54922   |
| 20 | F09 | 21017 | CG18301         | 13.16498    | 0.056237    | 234.0981916 |
| 20 | F10 | 20920 | CG17195         | 13.54811667 | 0.053576333 | 252.8750257 |
| 20 | F11 | 21009 | CG18547         | 12.14552667 | 0.057366667 | 211.7174898 |
| 20 | F12 | 20922 | CG17287         | 12.92703    | 0.057068667 | 226.5171197 |
| 20 | F13 | 21003 | CG18146,CG8930  | 15.35084    | 0.055227    | 277.9589693 |
| 20 | F14 | 26186 | CG14598         | 13.85106667 | 0.051654    | 268.1509015 |
| 20 | F15 | 21014 | CG18088         | 15.68992667 | 0.049568    | 316.5333818 |
| 20 | F16 | 26184 | CG14561,CG7485  | 13.52869333 | 0.049337333 | 274.2080372 |
| 20 | F17 | 20892 | CG17003         | 13.51551333 | 0.05662     | 238.7056399 |
| 20 | F18 | 26179 | CG14528         | 13.16456333 | 0.045759    | 287.6934228 |
| 20 | F19 | 20915 | CG16959         | 13.35449333 | 0.04767     | 280.1446053 |
| 20 | F20 | 26185 | CG14570         | 13.93164333 | 0.049325    | 282.4458861 |
| 20 | F21 | 20917 | CG17045         | 14.26886333 | 0.044979667 | 317.2291924 |
| 20 | F22 | 26204 | CG14735         | 12.86141333 | 0.042875667 | 299.9699907 |
| 20 | F23 | 20911 | CG16902         | 21.30428333 | 0.049987333 | 426.1936357 |
| 20 | F24 | 24825 | CG10478         | 14.52592667 | 0.041933    | 346.4080001 |
| 20 | G01 | 21688 | CG8592          | 17.69043333 | 0.053932333 | 328.0116442 |
| 20 | G02 | 21103 | CG7166          | 14.91472    | 0.054200667 | 275.1759511 |
| 20 | G03 | 21714 | CG15155         | 16.21969    | 0.05667     | 286.2129875 |
| 20 | G04 | 21104 | CG33214         | 14.02354667 | 0.054448    | 257.5585268 |
| 20 | G05 | 21692 | CG8616          | 12.91100333 | 0.049699667 | 259.7804814 |
| 20 | G06 | 21114 | CG7120          | 14.92227333 | 0.059373333 | 251.3295531 |
| 20 | G07 | 21707 | CG14957,CG32284 | 14.72356667 | 0.05185     | 283.9646416 |
| 20 | G08 | 21136 | CG7091          | 14.27720333 | 0.051365333 | 277.9540676 |
| 20 | G09 | 21731 | CG14961         | 15.64199    | 0.053734    | 291.1004206 |
| 20 | G10 | 26965 | CG11875         | 14.81375667 | 0.048365333 | 306.288733  |
| 20 | G11 | 21113 | CG18627         | 17.08099333 | 0.057648667 | 296.2946816 |

|    |     |       |                 |             |             |             |
|----|-----|-------|-----------------|-------------|-------------|-------------|
| 20 | G12 | 26968 | CG12000         | 1.493313    | 0.036851333 | 40.52263147 |
| 20 | G13 | 21118 | CG6892          | 14.11697    | 0.068738    | 205.3735925 |
| 20 | G14 | 26970 | CG12783         | 13.88482    | 0.049547    | 280.2353321 |
| 20 | G15 | 21119 | CG6930          | 16.02746    | 0.059051    | 271.4172495 |
| 20 | G16 | 26964 | CG11837         | 9.69371     | 0.052426333 | 184.9015444 |
| 20 | G17 | 21123 | CG7049          | 14.58851333 | 0.051312    | 284.309973  |
| 20 | G18 | 26966 | CG11920         | 11.46097667 | 0.052595667 | 217.907242  |
| 20 | G19 | 21168 | CG6974          | 16.15505    | 0.046064667 | 350.7037209 |
| 20 | G20 | 26967 | CG11968         | 12.44524333 | 0.039542    | 314.7347968 |
| 20 | G21 | 21109 | CG17141,CG6990  | 14.48462    | 0.042871333 | 337.8625966 |
| 20 | G22 | 26947 | CG11695         | 14.08272333 | 0.045271667 | 311.0714575 |
| 20 | G23 | 21134 | CG7023          | 15.89514333 | 0.043952333 | 361.6450397 |
| 20 | G24 | 26969 | CG12036         | 14.51606333 | 0.048474667 | 299.4566922 |
| 20 | H01 | 26996 | CG13126         | 18.05118333 | 0.059338    | 304.2095004 |
| 20 | H02 | 20949 | CG30486         | 12.63858333 | 0.065012333 | 194.4028569 |
| 20 | H03 | 26950 | CG13886         | 13.97565    | 0.062452    | 223.7822648 |
| 20 | H04 | 20902 | CG17524         | 14.37525    | 0.054810333 | 262.272625  |
| 20 | H05 | 21018 | CG17633         | 13.9815     | 0.060943667 | 229.4167838 |
| 20 | H06 | 20931 | CG17148,CG5632  | 13.73929667 | 0.058389    | 235.3062506 |
| 20 | H07 | 21022 | CG17680         | 14.87878    | 0.053996667 | 275.5499722 |
| 20 | H08 | 20933 | CG17240         | 13.51329333 | 0.052767    | 256.0936444 |
| 20 | H09 | 21029 | CG18302         | 15.41031    | 0.051782    | 297.5997451 |
| 20 | H10 | 20932 | CG17197         | 15.65471333 | 0.060263667 | 259.7703426 |
| 20 | H11 | 21021 | CG18553         | 16.42835667 | 0.04894     | 335.6836262 |
| 20 | H12 | 20934 | CG17301         | 14.59824    | 0.052956333 | 275.6656113 |
| 20 | H13 | 21015 | CG18155         | 15.28658    | 0.057126    | 267.5940903 |
| 20 | H14 | 26158 | CG14795         | 15.13410667 | 0.052128333 | 290.3240081 |
| 20 | H15 | 21026 | CG18095         | 14.34999    | 0.046279333 | 310.0733949 |
| 20 | H16 | 26196 | CG14563,CG7145  | 13.94616667 | 0.050251333 | 277.5282911 |
| 20 | H17 | 20904 | CG17010         | 13.23832667 | 0.048049333 | 275.5153037 |
| 20 | H18 | 26200 | CG14654         | 13.70824667 | 0.044478667 | 308.1982374 |
| 20 | H19 | 20927 | CG16963         | 14.47310667 | 0.046899667 | 308.5972182 |
| 20 | H20 | 26202 | CG31374         | 13.33351333 | 0.047686667 | 279.6067384 |
| 20 | H21 | 20929 | CG17061         | 13.94059    | 0.043439667 | 320.9184386 |
| 20 | H22 | 26201 | CG14671         | 15.58767667 | 0.045181    | 345.0051275 |
| 20 | H23 | 20923 | CG16908         | 13.74169    | 0.057619667 | 238.4895782 |
| 20 | H24 | 24837 | CG31911         | 16.25949333 | 0.043012667 | 378.0163983 |
| 20 | I01 | 21700 | CG8597,CG8598   | 15.47447333 | 0.064192667 | 241.0629459 |
| 20 | I02 | 21115 | CG7168          | 13.82881667 | 0.06272     | 220.4849596 |
| 20 | I03 | 21708 | CG33157         | 15.51208667 | 0.058539333 | 264.9857076 |
| 20 | I04 | 21116 | CG7197          | 11.70365333 | 0.061565333 | 190.1013557 |
| 20 | I05 | 21704 | CG12505,CG8617  | 12.39352667 | 0.060139333 | 206.0802137 |
| 20 | I06 | 21126 | CG7133          | 13.87018    | 0.059810667 | 231.9014446 |
| 20 | I07 | 21701 | CG31781,CG32832 | 13.133      | 0.064033    | 205.0973717 |
| 20 | I08 | 21163 | CG7182          | 10.05042433 | 0.062462333 | 160.9037607 |
| 20 | I09 | 21703 | CG15170         | 14.98901333 | 0.056391667 | 265.8019211 |
| 20 | I10 | 26977 | CG11880         | 11.22365333 | 0.061593667 | 182.2208993 |
| 20 | I11 | 21125 | CG18630         | 13.76687    | 0.064301333 | 214.0992929 |
| 20 | I12 | 26980 | CG12004         | 13.37266    | 0.055269333 | 241.9544292 |
| 20 | I13 | 21130 | CG6893          | 13.40144    | 0.062493667 | 214.4447704 |
| 20 | I14 | 26982 | CG12795         | 11.38319133 | 0.056745    | 200.6025435 |
| 20 | I15 | 21131 | CG6933          | 12.66596    | 0.057906    | 218.7331192 |
| 20 | I16 | 26976 | CG11842         | 13.96359    | 0.054473333 | 256.3380859 |
| 20 | I17 | 21135 | CG7053          | 13.34615    | 0.058200667 | 229.3126654 |

|    |     |       |                       |             |             |             |
|----|-----|-------|-----------------------|-------------|-------------|-------------|
| 20 | I18 | 26978 | CG11926               | 15.00325333 | 0.058843667 | 254.9680226 |
| 20 | I19 | 21129 | CG6865                | 12.72795833 | 0.052748667 | 241.2944087 |
| 20 | I20 | 26979 | CG11971               | 14.61230667 | 0.049019333 | 298.0927253 |
| 20 | I21 | 21121 | CG6992                | 12.63192333 | 0.048245667 | 261.8250344 |
| 20 | I22 | 26959 | CG11696               | 14.23682667 | 0.048685333 | 292.4253711 |
| 20 | I23 | 21146 | CG7025                | 13.93678333 | 0.043530333 | 320.1625686 |
| 20 | I24 | 26981 | CG32599               | 12.54533    | 0.047517667 | 264.0140158 |
| 20 | J01 | 26961 | CG13280               | 12.72214667 | 0.068437    | 185.8957387 |
| 20 | J02 | 20936 | CG17390               | 10.667663   | 0.070540667 | 151.2271361 |
| 20 | J03 | 26962 | CG13890               | 11.76465333 | 0.054340667 | 216.4981414 |
| 20 | J04 | 20914 | CG17530               | 10.50995033 | 0.054326    | 193.46078   |
| 20 | J05 | 21030 | CG17639               | 11.50883333 | 0.063040667 | 182.5620499 |
| 20 | J06 | 20942 | CG17149               | 14.98413333 | 0.066551    | 225.1526398 |
| 20 | J07 | 21034 | CG30417               | 11.91045733 | 0.058363    | 204.0754816 |
| 20 | J08 | 20944 | CG17245               | 11.65080333 | 0.067202667 | 173.3681699 |
| 20 | J09 | 21041 | CG18324               | 11.79022333 | 0.054497333 | 216.3449588 |
| 20 | J10 | 20943 | CG17198               | 12.27415667 | 0.057810333 | 212.3176941 |
| 20 | J11 | 21033 | CG18555               | 13.09776    | 0.055799667 | 234.7282839 |
| 20 | J12 | 20945 | CG17319               | 10.806879   | 0.05511     | 196.0965161 |
| 20 | J13 | 21035 | CG17795               | 13.42108333 | 0.057168    | 234.7656614 |
| 20 | J14 | 26211 | CG14634               | 12.33822    | 0.054716    | 225.4956503 |
| 20 | J15 | 21038 | CG18096               | 15.51188333 | 0.051454    | 301.4708931 |
| 20 | J16 | 26208 | CG14564               | 13.32725    | 0.054666333 | 243.7926451 |
| 20 | J17 | 20916 | CG17011               | 13.17526333 | 0.055468667 | 237.526231  |
| 20 | J18 | 26212 | CG14656               | 11.70332    | 0.049543333 | 236.2239117 |
| 20 | J19 | 20938 | CG16965               | 13.28829667 | 0.0509      | 261.0667322 |
| 20 | J20 | 26214 | CG14707               | 10.48468667 | 0.047664667 | 219.967691  |
| 20 | J21 | 20940 | CG17063               | 11.61854667 | 0.044894333 | 258.7976211 |
| 20 | J22 | 26213 | CG14676               | 11.72365333 | 0.045820667 | 255.8595103 |
| 20 | J23 | 20975 | CG17030               | 10.94931667 | 0.044170667 | 247.8866065 |
| 20 | J24 | 24849 | CG11053               | 13.06163667 | 0.047398    | 275.5735826 |
| 20 | K02 | 21127 | CG7169                | 7.049554333 | 0.069831667 | 100.9506814 |
| 20 | K03 | 21720 | CG32255,CG33157       | 13.01167667 | 0.051832667 | 251.0323605 |
| 20 | K04 | 21128 | CG7204                | 12.83502    | 0.060674    | 211.5406929 |
| 20 | K05 | 21716 | CG8620                | 14.31719333 | 0.059975    | 238.7193553 |
| 20 | K06 | 21138 | CG7137                | 10.32728167 | 0.053483    | 193.0946594 |
| 20 | K07 | 21713 | CG33179               | 12.40816333 | 0.066932    | 185.3846192 |
| 20 | K08 | 26927 | CG11737               | 11.58749867 | 0.054911667 | 211.020706  |
| 20 | K09 | 21722 | CG15048,CG6335,CG6481 | 13.87052333 | 0.059651667 | 232.5253276 |
| 20 | K1  | 21717 | CG8669                | 12.027768   | 0.062963    | 191.0291441 |
| 20 | K10 | 26989 | CG11886               | 11.75628933 | 0.055172    | 213.0843423 |
| 20 | K11 | 21137 | CG31121               | 13.45076333 | 0.055301667 | 243.2252795 |
| 20 | K12 | 26992 | CG12006               | 13.32304    | 0.054951667 | 242.4501532 |
| 20 | K13 | 21142 | CG32540               | 15.50261333 | 0.057786    | 268.2762838 |
| 20 | K14 | 26994 | CG12847               | 12.61381    | 0.057224333 | 220.4273823 |
| 20 | K15 | 21108 | CG32770               | 13.46801333 | 0.059275333 | 227.211094  |
| 20 | K16 | 26988 | CG11844               | 11.41295333 | 0.052021    | 219.3912715 |
| 20 | K17 | 21147 | CG7059                | 15.08465333 | 0.053471333 | 282.1072974 |
| 20 | K18 | 26990 | CG33096               | 11.218924   | 0.051418333 | 218.1891803 |
| 20 | K19 | 21141 | CG6866                | 14.50044333 | 0.054086667 | 268.0964501 |
| 20 | K20 | 26987 | CG11784               | 11.702673   | 0.047545    | 246.138879  |
| 20 | K21 | 21169 | CG7000                | 12.28608    | 0.047855667 | 256.7319788 |
| 20 | K22 | 26971 | CG11710               | 11.54517333 | 0.047667333 | 242.2030461 |
| 20 | K23 | 21158 | CG7033                | 9.484227333 | 0.066813    | 141.9518257 |

|    |     |       |                 |             |             |             |
|----|-----|-------|-----------------|-------------|-------------|-------------|
| 20 | K24 | 26993 | CG12050         | 7.607099    | 0.056556    | 134.5056051 |
| 20 | L01 | 26973 | CG13295         | 14.91381333 | 0.062109    | 240.1232242 |
| 20 | L02 | 20947 | CG10042         | 11.94704667 | 0.084075    | 142.0998711 |
| 20 | L03 | 26960 | CG12992         | 12.77444333 | 0.063388333 | 201.5267268 |
| 20 | L04 | 20948 | CG17475         | 11.71704667 | 0.058173667 | 201.4149587 |
| 20 | L05 | 20983 | CG18341         | 11.78132667 | 0.058882333 | 200.0825375 |
| 20 | L06 | 20954 | CG17152         | 13.99095333 | 0.056472667 | 247.7473468 |
| 20 | L07 | 21046 | CG17697         | 11.384792   | 0.063397    | 179.5793492 |
| 20 | L08 | 20956 | CG17255         | 10.500089   | 0.068217333 | 153.9211295 |
| 20 | L09 | 21001 | CG31039         | 12.48887733 | 0.063690667 | 196.0864596 |
| 20 | L10 | 20955 | CG17199         | 11.60377667 | 0.055058333 | 210.7542304 |
| 20 | L11 | 21037 | CG30495         | 13.42197    | 0.055394    | 242.3000686 |
| 20 | L12 | 20957 | CG17329         | 11.77385    | 0.054181667 | 217.3032083 |
| 20 | L13 | 21047 | CG17799         | 12.37422667 | 0.056307333 | 219.7622571 |
| 20 | L14 | 26223 | CG14635         | 9.437751667 | 0.053724    | 175.6710533 |
| 20 | L15 | 21036 | CG17907         | 11.61764267 | 0.051615333 | 225.0812291 |
| 20 | L16 | 26220 | CG14565         | 11.30710333 | 0.054296333 | 208.2480094 |
| 20 | L17 | 20928 | CG17012         | 11.51024    | 0.049943    | 230.467533  |
| 20 | L18 | 26215 | CG14532         | 11.35793333 | 0.052501667 | 216.3347195 |
| 20 | L19 | 20950 | CG32149         | 7.374355667 | 0.047209667 | 156.2043579 |
| 20 | L20 | 26221 | CG14573         | 11.34419567 | 0.046446    | 244.2448363 |
| 20 | L21 | 20952 | CG17068         | 13.80130667 | 0.051387667 | 268.5723552 |
| 20 | L22 | 26205 | CG14774         | 11.34116667 | 0.049332    | 229.8947269 |
| 20 | L23 | 20946 | CG16922         | 13.82023    | 0.049671    | 278.2353889 |
| 20 | L24 | 24885 | CG11077         | 12.55342667 | 0.053294    | 235.5504685 |
| 20 | M01 | 21690 | CG15149,CG31740 | 12.76117    | 0.070635667 | 180.6618469 |
| 20 | M02 | 21139 | CG7171          | 12.27435667 | 0.053293667 | 230.3154846 |
| 20 | M03 | 21718 | CG14931         | 10.84388333 | 0.051101333 | 212.2035302 |
| 20 | M04 | 21140 | CG7211          | 13.08083333 | 0.054849    | 238.4880915 |
| 20 | M05 | 21728 | CG32386,CG32390 | 11.35639    | 0.055808    | 203.4903598 |
| 20 | M06 | 21150 | CG7140          | 12.63275    | 0.053395    | 236.5905047 |
| 20 | M07 | 21725 | CG15136         | 12.88801    | 0.053560333 | 240.626023  |
| 20 | M08 | 26963 | CG11778         | 12.84108667 | 0.063221    | 203.1142606 |
| 20 | M09 | 21084 | CG31159         | 14.23171    | 0.056985667 | 249.7419234 |
| 20 | M10 | 27001 | CG11899         | 12.51452    | 0.051481333 | 243.0884981 |
| 20 | M11 | 21149 | CG18641         | 11.13554    | 0.062914    | 176.9962171 |
| 20 | M12 | 27004 | CG12013         | 12.76474667 | 0.056607667 | 225.4950154 |
| 20 | M13 | 21154 | CG6898          | 13.03393333 | 0.052761333 | 247.035708  |
| 20 | M14 | 27006 | CG12869         | 12.40019    | 0.052071667 | 238.1369907 |
| 20 | M15 | 21155 | CG6939          | 14.11420667 | 0.055588333 | 253.9059155 |
| 20 | M16 | 26975 | CG11780         | 12.66082333 | 0.04395     | 288.0733409 |
| 20 | M17 | 21159 | CG7060          | 11.72946    | 0.050959667 | 230.1714428 |
| 20 | M18 | 27002 | CG31445         | 11.90114    | 0.046449333 | 256.2176709 |
| 20 | M19 | 21153 | CG6868          | 12.02842    | 0.048187333 | 249.6178802 |
| 20 | M20 | 27003 | CG11980         | 11.90842    | 0.050359667 | 236.4674111 |
| 20 | M21 | 21145 | CG6995          | 9.020268    | 0.066235667 | 136.1844525 |
| 20 | M22 | 26983 | CG11711,CG33047 | 11.3655     | 0.049616667 | 229.066174  |
| 20 | M23 | 21170 | CG7036          | 7.580979667 | 0.052468333 | 144.4867634 |
| 20 | M24 | 27005 | CG12734         | 12.37830667 | 0.046154    | 268.1957505 |
| 20 | N01 | 26985 | CG13848         | 13.77482333 | 0.06169     | 223.291025  |
| 20 | N02 | 20959 | CG31624         | 9.775751    | 0.059026333 | 165.6167756 |
| 20 | N03 | 26972 | CG13091         | 14.74040667 | 0.065571    | 224.8006995 |
| 20 | N04 | 20937 | CG17568         | 11.14808967 | 0.054966    | 202.8179177 |
| 20 | N05 | 21054 | CG17652         | 11.20354333 | 0.056893    | 196.9230544 |

|    |     |       |                 |             |             |             |
|----|-----|-------|-----------------|-------------|-------------|-------------|
| 20 | N06 | 20966 | CG17166         | 12.56272367 | 0.064341667 | 195.2502059 |
| 20 | N07 | 21058 | CG31937         | 12.19376667 | 0.055313667 | 220.447629  |
| 20 | N08 | 20968 | CG31194         | 12.05124667 | 0.055352333 | 217.7188556 |
| 20 | N09 | 21013 | CG17970         | 11.51294    | 0.052655    | 218.6485614 |
| 20 | N10 | 20967 | CG17200         | 12.3662     | 0.052349333 | 236.2245938 |
| 20 | N11 | 21057 | CG18563         | 12.07218367 | 0.060638667 | 199.0839233 |
| 20 | N12 | 20953 | CG17131         | 12.63347667 | 0.056115    | 225.1354659 |
| 20 | N13 | 21059 | CG17801         | 12.239      | 0.058210333 | 210.2547658 |
| 20 | N14 | 26234 | CG14615         | 12.57276333 | 0.049936    | 251.7775419 |
| 20 | N15 | 21062 | CG18132         | 12.41003333 | 0.045627667 | 271.9848338 |
| 20 | N16 | 26207 | CG14551         | 12.59940667 | 0.04882     | 258.0787928 |
| 20 | N17 | 20918 | CG31871         | 10.68066    | 0.050465    | 211.6449024 |
| 20 | N18 | 26231 | CG14556         | 11.32411667 | 0.051546    | 219.689533  |
| 20 | N19 | 20962 | CG16992         | 11.45113667 | 0.048913667 | 234.1091447 |
| 20 | N20 | 26218 | CG14824         | 11.17492667 | 0.048354667 | 231.1033751 |
| 20 | N21 | 20930 | CG17109         | 13.39383333 | 0.047265    | 283.3774111 |
| 20 | N22 | 26242 | CG14827         | 11.07411    | 0.047665667 | 232.32886   |
| 20 | N23 | 20941 | CG17122,CG32227 | 13.63825333 | 0.048961333 | 278.55151   |
| 20 | N24 | 24897 | CG11079         | 11.41198    | 0.046190667 | 247.0624657 |
| 20 | O01 | 21741 | CG8671,CG8674   | 11.83539333 | 0.062392333 | 189.6930713 |
| 20 | O02 | 21151 | CG7179          | 11.69250333 | 0.071354    | 163.8661229 |
| 20 | O03 | 21744 | CG15001         | 11.94790333 | 0.057425333 | 208.0597994 |
| 20 | O04 | 21160 | CG7098          | 15.10031    | 0.057744    | 261.5043987 |
| 20 | O05 | 21740 | CG8626          | 11.18675233 | 0.063082333 | 177.3357411 |
| 20 | O06 | 21162 | CG7142          | 12.96467333 | 0.075571333 | 171.5554399 |
| 20 | O07 | 21719 | CG14960         | 11.60199333 | 0.060022333 | 193.294607  |
| 20 | O08 | 26951 | CG31453         | 12.33528667 | 0.062235333 | 198.2039142 |
| 20 | O09 | 21144 | CG6967          | 12.15680667 | 0.063079    | 192.723516  |
| 20 | O10 | 27013 | CG11901         | 10.49511533 | 0.053088667 | 197.6903168 |
| 20 | O11 | 21161 | CG18647         | 10.69673933 | 0.061053667 | 175.2022428 |
| 20 | O12 | 27016 | CG12019         | 11.59690667 | 0.059202    | 195.8870759 |
| 20 | O13 | 21166 | CG6901          | 13.80056667 | 0.076925    | 179.4028816 |
| 20 | O14 | 26995 | CG11715         | 7.779723667 | 0.055094333 | 141.2073292 |
| 20 | O15 | 21167 | CG31116         | 12.16311667 | 0.058945333 | 206.3457101 |
| 20 | O16 | 27012 | CG11851         | 10.77547667 | 0.058679    | 183.6342928 |
| 20 | O17 | 21157 | CG32224,CG6996  | 13.25463    | 0.057786667 | 229.3717697 |
| 20 | O18 | 27014 | CG11956         | 12.33255    | 0.049402    | 249.6366544 |
| 20 | O19 | 21165 | CG6869          | 11.85929667 | 0.058953333 | 201.1641411 |
| 20 | O20 | 27011 | CG11798         | 10.79209433 | 0.056140667 | 192.233099  |
| 20 | O21 |       | wts             | 53.02417667 | 0.050103    | 1058.303428 |
| 20 | O22 |       | HFA17794        | 1.285951    | 0.022559    | 57.00390088 |
| 20 | O23 |       | hpo             | 34.68433    | 0.048480667 | 715.4260117 |
| 20 | O24 |       | Luc             | 2.206167333 | 0.052047333 | 42.38771119 |
| 20 | P01 | 27008 | CG30043         | 10.18235167 | 0.071763667 | 141.8872828 |
| 20 | P02 | 20971 | CG10014,CG17404 | 11.78456933 | 0.082251667 | 143.2745355 |
| 20 | P03 | 26984 | CG13125         | 12.08735933 | 0.062302333 | 194.0113425 |
| 20 | P04 | 20972 | CG17522         | 12.54156333 | 0.063848    | 196.4284446 |
| 20 | P05 | 21065 | CG17654         | 10.190745   | 0.060718667 | 167.8354542 |
| 20 | P06 | 20978 | CG17173,CG9384  | 11.86556867 | 0.062219    | 190.7065152 |
| 20 | P07 | 21069 | CG17712         | 10.540043   | 0.062406667 | 168.8929014 |
| 20 | P08 | 20980 | CG17274         | 12.93729333 | 0.066303667 | 195.1218384 |
| 20 | P09 | 21044 | CG18467         | 11.76193467 | 0.063010667 | 186.6657709 |
| 20 | P10 | 20977 | CG17141         | 12.70402667 | 0.062262333 | 204.040324  |
| 20 | P11 | 21061 | CG40278         | 1.255355333 | 0.046999    | 26.71025625 |

|    |     |       |                |             |             |             |
|----|-----|-------|----------------|-------------|-------------|-------------|
| 20 | P12 | 20965 | CG17134        | 11.82466333 | 0.067519667 | 175.1291722 |
| 20 | P13 | 21063 | CG18190        | 10.64125667 | 0.057475333 | 185.1447578 |
| 20 | P14 | 26192 | CG14734        | 11.75225667 | 0.064044667 | 183.5009421 |
| 20 | P15 | 21073 | CG18136        | 12.70191333 | 0.064205    | 197.8337097 |
| 20 | P16 | 26244 | CG14567        | 10.90499333 | 0.056669667 | 192.4308713 |
| 20 | P17 | 20951 | CG31883        | 11.70944667 | 0.054755333 | 213.8503403 |
| 20 | P18 | 26239 | CG14537        | 11.20868967 | 0.053931    | 207.8338927 |
| 20 | P19 | 20974 | CG16998        | 11.53623667 | 0.049923333 | 231.0790546 |
| 20 | P20 | 26245 | CG14579        | 12.6146     | 0.046869333 | 269.1440032 |
| 20 | P21 |       | wts            | 52.31354667 | 0.048792667 | 1072.160024 |
| 20 | P22 |       | HFA17794       | 1.126591    | 0.023351667 | 48.24456498 |
| 20 | P23 |       | hpo            | 35.07875333 | 0.043805667 | 800.7811775 |
| 20 | P24 |       | Luc            | 1.982460667 | 0.051786    | 38.28178787 |
| 21 | A01 |       | DIAP1          | 0.453518667 | 0.020142333 | 22.51569663 |
| 21 | A02 |       | ex/ft          | 33.76347333 | 0.058127333 | 580.8536432 |
| 21 | A03 |       | Luc            | 1.992728    | 0.070266667 | 28.35950664 |
| 21 | A04 |       | hpo            | 34.15019333 | 0.05286     | 646.0498171 |
| 21 | A05 | 24819 | CG11149        | 14.94473667 | 0.063438    | 235.580199  |
| 21 | A06 | 30743 | CG9344         | 12.07498567 | 0.135678667 | 88.99693639 |
| 21 | A07 | 24821 | CG11210        | 13.41246333 | 0.138121667 | 97.10615037 |
| 21 | A08 | 30749 | CG9064         | 16.77993333 | 0.138066    | 121.5355941 |
| 21 | A09 | 24822 | CG11262        | 13.63867333 | 0.134953333 | 101.0621449 |
| 21 | A10 | 30748 | CG8993         | 13.69024    | 0.139624    | 98.05076491 |
| 21 | A11 | 24814 | CG12077        | 12.60851633 | 0.14173     | 88.96152073 |
| 21 | A12 | 30764 | CG9263         | 13.42997    | 0.143522667 | 93.57386057 |
| 21 | A13 | 24816 | CG12173        | 11.44541467 | 0.139165667 | 82.24309157 |
| 21 | A14 | 20508 | CG7255         | 11.99655667 | 0.149398    | 80.29931235 |
| 21 | A15 | 24823 | CG11289        | 11.87048667 | 0.148041333 | 80.18359737 |
| 21 | A16 | 20509 | CG7306         | 11.42621    | 0.159643    | 71.5735109  |
| 21 | A17 | 24815 | CG12117        | 13.06368    | 0.143522333 | 91.02193155 |
| 21 | A18 | 20513 | CG7442         | 13.10922667 | 0.14781     | 88.68971427 |
| 21 | A19 | 24818 | CG11109        | 12.38417    | 0.147552    | 83.93088538 |
| 21 | A20 | 20504 | CG7200         | 12.10294    | 0.152293333 | 79.47123971 |
| 21 | A21 | 30745 | CG8822         | 12.87825    | 0.150552333 | 85.54002263 |
| 21 | A22 | 20512 | CG7404         | 14.56917333 | 0.145008    | 100.4715142 |
| 21 | A23 | 30747 | CG8934         | 13.59046667 | 0.148699667 | 91.39540775 |
| 21 | A24 | 20514 | CG8078         | 13.99545333 | 0.177874667 | 78.68154356 |
| 21 | B01 |       | DIAP1          | 0.544314    | 0.023104667 | 23.55861731 |
| 21 | B02 |       | ex/ft          | 38.47688333 | 0.060087333 | 640.3493249 |
| 21 | B03 |       | Luc            | 2.036899333 | 0.062642333 | 32.51633879 |
| 21 | B04 |       | hpo            | 36.91906333 | 0.057291    | 644.4129677 |
| 21 | B05 | 20515 | CG8107         | 12.44875333 | 0.070620333 | 176.2771817 |
| 21 | B06 | 26257 | CG14896        | 11.11435    | 0.131814    | 84.31843355 |
| 21 | B07 | 20562 | CG8095         | 10.49831033 | 0.132705333 | 79.1099353  |
| 21 | B08 | 26259 | CG15477        | 13.49288667 | 0.14247     | 94.70686226 |
| 21 | B09 | 25677 | CG12057        | 12.13987333 | 0.1372      | 88.48304179 |
| 21 | B10 | 26256 | CG14868,CG6136 | 13.12137333 | 0.139489333 | 94.06721661 |
| 21 | B11 | 25682 | CG12234        | 8.719294667 | 0.134811333 | 64.67775706 |
| 21 | B12 | 26260 | CG15488        | 10.040181   | 0.146506667 | 68.53054013 |
| 21 | B13 | 25686 | CG12464        | 12.27333    | 0.14642     | 83.82277011 |
| 21 | B14 | 26253 | CG15571        | 9.77661     | 0.141241667 | 69.21902177 |
| 21 | B15 | 25683 | CG12320        | 12.35705333 | 0.149371667 | 82.7268893  |
| 21 | B16 | 26251 | CG14829        | 12.43559667 | 0.153406333 | 81.0631243  |
| 21 | B17 | 25684 | CG12388        | 14.05571667 | 0.156581333 | 89.76623437 |

|    |     |       |         |             |             |             |
|----|-----|-------|---------|-------------|-------------|-------------|
| 21 | B18 | 31320 | CG10045 | 12.13015    | 0.144157    | 84.14541091 |
| 21 | B19 | 30361 | CG5690  | 13.32503    | 0.146382    | 91.02915659 |
| 21 | B20 | 31321 | CG11314 | 11.42087333 | 0.154969333 | 73.6976348  |
| 21 | B21 | 30387 | CG5825  | 24.58792333 | 0.151340667 | 162.4673914 |
| 21 | B22 | 31323 | CG12490 | 12.84147333 | 0.148663667 | 86.3793664  |
| 21 | B23 | 30381 | CG5650  | 13.38679667 | 0.143276333 | 93.43341189 |
| 21 | B24 | 31334 | CG12171 | 15.05555333 | 0.165821    | 90.7940088  |
| 21 | C01 | 24829 | CG11093 | 12.542231   | 0.057829    | 216.8847983 |
| 21 | C02 | 30754 | CG9286  | 8.434777    | 0.063545    | 132.7370682 |
| 21 | C03 | 24824 | CG11323 | 12.81809667 | 0.066478    | 192.8171225 |
| 21 | C04 | 30762 | CG9094  | 13.42423467 | 0.062251    | 215.6468919 |
| 21 | C05 | 24831 | CG11152 | 13.28863333 | 0.057459667 | 231.2688901 |
| 21 | C06 | 30755 | CG9346  | 6.915743    | 0.143938667 | 48.04645729 |
| 21 | C07 | 24833 | CG11233 | 12.47962333 | 0.12512     | 99.74123508 |
| 21 | C08 | 30804 | CG9428  | 12.88201333 | 0.13875     | 92.84333934 |
| 21 | C09 | 24834 | CG11263 | 13.99904    | 0.133614333 | 104.771993  |
| 21 | C10 | 30760 | CG9007  | 11.99190333 | 0.139501    | 85.96284853 |
| 21 | C11 | 24826 | CG12078 | 13.53724    | 0.140708333 | 96.20780574 |
| 21 | C12 | 30776 | CG9264  | 14.63999    | 0.144895667 | 101.0381493 |
| 21 | C13 | 24828 | CG12178 | 15.03635    | 0.153783667 | 97.77598835 |
| 21 | C14 | 20520 | CG7262  | 11.53418333 | 0.138660333 | 83.18300595 |
| 21 | C15 | 24835 | CG11290 | 3.642606667 | 0.142273    | 25.60293708 |
| 21 | C16 | 20521 | CG7311  | 13.26109667 | 0.153776    | 86.23645216 |
| 21 | C17 | 24868 | CG11192 | 14.75213667 | 0.146815667 | 100.4806708 |
| 21 | C18 | 20525 | CG7447  | 13.43947667 | 0.142379    | 94.39226759 |
| 21 | C19 | 24830 | CG11126 | 13.09989    | 0.145453667 | 90.06228788 |
| 21 | C20 | 20559 | CG7390  | 13.97860333 | 0.152332333 | 91.76386278 |
| 21 | C21 | 30757 | CG8827  | 17.34111333 | 0.147704333 | 117.4042287 |
| 21 | C22 | 20524 | CG7408  | 13.44749333 | 0.146476    | 91.80680339 |
| 21 | C23 | 30759 | CG8946  | 10.56091033 | 0.140544    | 75.14308923 |
| 21 | C24 | 20526 | CG8080  | 14.42413    | 0.145717333 | 98.98705713 |
| 21 | D01 | 20519 | CG8247  | 16.19685667 | 0.076700333 | 211.1706164 |
| 21 | D02 | 30358 | CG6132  | 12.41891067 | 0.070246333 | 176.790874  |
| 21 | D03 | 20505 | CG8159  | 12.83665333 | 0.062932667 | 203.9744065 |
| 21 | D04 | 30371 | CG6192  | 13.38454333 | 0.057005667 | 234.7932077 |
| 21 | D05 | 20527 | CG8110  | 16.18569667 | 0.057324333 | 282.3529856 |
| 21 | D06 | 26269 | CG14901 | 12.28030667 | 0.129971333 | 94.48473253 |
| 21 | D07 | 20574 | CG8097  | 14.03819667 | 0.134429667 | 104.4278173 |
| 21 | D08 | 26271 | CG15478 | 14.43415333 | 0.132994667 | 108.5318208 |
| 21 | D09 | 25721 | CG12438 | 13.91097667 | 0.136731    | 101.739742  |
| 21 | D10 | 26266 | CG15582 | 11.68607333 | 0.13645     | 85.64363015 |
| 21 | D11 | 25678 | CG12539 | 14.39354    | 0.14399     | 99.9620807  |
| 21 | D12 | 26264 | CG15553 | 14.30459333 | 0.144566667 | 98.94807471 |
| 21 | D13 | 25698 | CG12470 | 13.16265667 | 0.145774667 | 90.29454135 |
| 21 | D14 | 26265 | CG15572 | 14.89954667 | 0.153652667 | 96.96900802 |
| 21 | D15 | 25750 | CG12602 | 13.61245    | 0.147822    | 92.08676652 |
| 21 | D16 | 26273 | CG15506 | 13.054      | 0.154808    | 84.32380756 |
| 21 | D17 | 25696 | CG12396 | 7.663571    | 0.150161333 | 51.03558173 |
| 21 | D18 | 31330 | CG12175 | 12.58050333 | 0.158932333 | 79.15634956 |
| 21 | D19 | 30412 | CG5911  | 13.27756    | 0.148125667 | 89.63713243 |
| 21 | D20 | 31353 | CG11190 | 13.40745    | 0.145538667 | 92.12294098 |
| 21 | D21 | 30399 | CG5827  | 1.581492333 | 0.133745    | 11.82468379 |
| 21 | D22 | 31331 | CG2849  | 13.58726667 | 0.150057    | 90.54736978 |
| 21 | D23 | 30386 | CG5788  | 19.71306667 | 0.138897333 | 141.9254509 |



|    |     |       |                 |             |             |             |
|----|-----|-------|-----------------|-------------|-------------|-------------|
| 21 | D24 | 31346 | CG12242         | 15.66867    | 0.142888667 | 109.6564925 |
| 21 | E01 | 24820 | CG11178         | 21.79786333 | 0.051281    | 425.0670489 |
| 21 | E02 | 30766 | CG9290          | 17.42495667 | 0.058161333 | 299.5969258 |
| 21 | E03 | 24844 | CG11183         | 21.42301667 | 0.052627667 | 407.0675754 |
| 21 | E04 | 30774 | CG9100          | 17.79716333 | 0.053443667 | 333.0079024 |
| 21 | E05 | 24843 | CG11153         | 14.98223667 | 0.058918667 | 254.2867569 |
| 21 | E06 | 30767 | CG9351          | 15.56795    | 0.129857667 | 119.8847199 |
| 21 | E07 | 24845 | CG11247         | 15.85973667 | 0.130947667 | 121.1150765 |
| 21 | E08 | 30773 | CG9073          | 17.37894667 | 0.130209333 | 133.4692854 |
| 21 | E09 | 24846 | CG11268         | 18.54037333 | 0.147198667 | 125.9547641 |
| 21 | E10 | 30816 | CG9430          | 16.35604333 | 0.132588333 | 123.3595967 |
| 21 | E11 | 24838 | CG12081         | 15.74493667 | 0.141827    | 111.0150865 |
| 21 | E12 | 30788 | CG9265          | 17.23629    | 0.147745667 | 116.6618987 |
| 21 | E13 | 24840 | CG12181         | 16.44636333 | 0.140349333 | 117.1816277 |
| 21 | E14 | 20532 | CG7264          | 14.42960667 | 0.141922333 | 101.672558  |
| 21 | E15 | 24847 | CG11291         | 15.58271333 | 0.143952    | 108.2493702 |
| 21 | E16 | 20533 | CG31670         | 19.30377333 | 0.151437    | 127.4706534 |
| 21 | E17 | 24904 | CG11209         | 17.0356     | 0.147379    | 115.5904165 |
| 21 | E18 | 20537 | CG8063          | 16.58072    | 0.143001667 | 115.9477395 |
| 21 | E19 | 24842 | CG11128         | 12.87881667 | 0.145510333 | 88.50791811 |
| 21 | E20 | 20528 | CG7218          | 16.87355333 | 0.146102333 | 115.4913337 |
| 21 | E21 | 30769 | CG8849          | 16.35070333 | 0.1473      | 111.0027382 |
| 21 | E22 | 20536 | CG7415          | 18.11333    | 0.14539     | 124.5844281 |
| 21 | E23 | 30801 | CG8800          | 16.37596333 | 0.145288    | 112.7138052 |
| 21 | E24 | 20595 | CG7402          | 17.84545667 | 0.141176333 | 126.4054409 |
| 21 | F01 | 20566 | CG8231          | 9.337212333 | 0.078860333 | 118.4018877 |
| 21 | F02 | 30370 | CG6134          | 14.70464333 | 0.054725333 | 268.6990181 |
| 21 | F03 | 20506 | CG8196          | 15.64111    | 0.063685    | 245.601162  |
| 21 | F04 | 30428 | CG6125          | 9.455093333 | 0.067704667 | 139.6520181 |
| 21 | F05 | 20539 | CG8112          | 13.24484333 | 0.068499333 | 193.357259  |
| 21 | F06 | 26281 | CG14906         | 14.42519    | 0.135262333 | 106.6460237 |
| 21 | F07 | 20586 | CG8098          | 16.19175333 | 0.133831333 | 120.9862663 |
| 21 | F08 | 26318 | CG15473         | 15.06612    | 0.133890667 | 112.5255432 |
| 21 | F09 | 25733 | CG12439         | 15.12427    | 0.143908333 | 105.0965545 |
| 21 | F10 | 26280 | CG14871,CG5205  | 13.4608     | 0.134904667 | 99.78009162 |
| 21 | F11 | 25706 | CG12254         | 1.789758667 | 0.128607667 | 13.91642282 |
| 21 | F12 | 26276 | CG15554         | 12.29586333 | 0.149836667 | 82.06177838 |
| 21 | F13 | 25710 | CG12480         | 16.55115667 | 0.145612667 | 113.6656381 |
| 21 | F14 | 26267 | CG14839,CG14841 | 12.87981667 | 0.145578667 | 88.47324242 |
| 21 | F15 | 25680 | CG12607         | 14.04194333 | 0.143524333 | 97.83667346 |
| 21 | F16 | 26285 | CG31038         | 14.90264667 | 0.149565667 | 99.63948946 |
| 21 | F17 | 25681 | CG12127         | 15.88627333 | 0.142773333 | 111.2691913 |
| 21 | F18 | 31344 | CG10146         | 13.75647667 | 0.146235667 | 94.07059837 |
| 21 | F19 | 30385 | CG5712          | 15.67741333 | 0.147723333 | 106.1268588 |
| 21 | F20 | 31345 | CG11574         | 14.64608667 | 0.151665667 | 96.56824111 |
| 21 | F21 | 30411 | CG5832          | 15.00612333 | 0.151329333 | 99.16202631 |
| 21 | F22 | 31343 | CG2864          | 16.53157333 | 0.146516333 | 112.8309244 |
| 21 | F23 | 30427 | CG6094          | 15.3274     | 0.141606667 | 108.2392543 |
| 21 | F24 | 31358 | CG12324         | 2.674559333 | 0.147342667 | 18.15196775 |
| 21 | G01 | 24853 | CG32016         | 16.64511667 | 0.052475333 | 317.1988744 |
| 21 | G02 | 30778 | CG9295          | 18.64165333 | 0.054306    | 343.2706024 |
| 21 | G03 | 24848 | CG11328         | 15.25108667 | 0.055253333 | 276.0211149 |
| 21 | G04 | 30786 | CG9116          | 18.9871     | 0.051728    | 367.0565264 |
| 21 | G05 | 24855 | CG11155         | 16.57140667 | 0.064740333 | 255.9672744 |

|    |     |       |         |             |             |             |
|----|-----|-------|---------|-------------|-------------|-------------|
| 21 | G06 | 30779 | CG9359  | 12.97892    | 0.124715333 | 104.0683583 |
| 21 | G07 | 24857 | CG11250 | 15.06541667 | 0.133051    | 113.2303904 |
| 21 | G08 | 30785 | CG9074  | 16.22131    | 0.128466667 | 126.26863   |
| 21 | G09 | 24858 | CG11269 | 14.52981333 | 0.12897     | 112.660412  |
| 21 | G10 | 30784 | CG9016  | 18.90744    | 0.136212667 | 138.8082361 |
| 21 | G11 | 24850 | CG12091 | 17.46935    | 0.143425667 | 121.8007237 |
| 21 | G12 | 20522 | CG7338  | 11.51075333 | 0.143853    | 80.01747154 |
| 21 | G13 | 24852 | CG12194 | 17.90743333 | 0.145785667 | 122.8339777 |
| 21 | G14 | 20544 | CG7275  | 10.331527   | 0.153000667 | 67.52602603 |
| 21 | G15 | 24859 | CG11295 | 14.02275    | 0.155086667 | 90.41879809 |
| 21 | G16 | 20545 | CG7314  | 17.99063    | 0.137776333 | 130.5785222 |
| 21 | G17 | 24851 | CG12133 | 20.66876667 | 0.144995333 | 142.5478061 |
| 21 | G18 | 20549 | CG8064  | 14.44198667 | 0.144281667 | 100.0957849 |
| 21 | G19 | 24908 | CG12056 | 18.35360667 | 0.143168667 | 128.1956946 |
| 21 | G20 | 20540 | CG7222  | 16.17102    | 0.152603    | 105.9679036 |
| 21 | G21 | 30770 | CG8887  | 8.161928667 | 0.142975    | 57.08640438 |
| 21 | G22 | 20548 | CG7433  | 15.46257333 | 0.143214333 | 107.9680572 |
| 21 | G23 | 30813 | CG8817  | 11.96046667 | 0.134528    | 88.90689423 |
| 21 | G24 | 20550 | CG8090  | 20.02146333 | 0.143852    | 139.1809869 |
| 21 | H01 | 20543 | CG8258  | 11.47778333 | 0.072415667 | 158.4986214 |
| 21 | H02 | 30368 | CG6105  | 7.525714667 | 0.051183667 | 147.0335198 |
| 21 | H03 | 20518 | CG8197  | 17.82341667 | 0.062704667 | 284.2438628 |
| 21 | H04 | 30395 | CG6197  | 5.817138333 | 0.104553333 | 55.63799974 |
| 21 | H05 | 20589 | CG8195  | 15.07563333 | 0.058745667 | 256.6254532 |
| 21 | H06 | 26293 | CG14907 | 17.65469667 | 0.129553    | 136.2739316 |
| 21 | H07 | 20598 | CG8104  | 17.07709667 | 0.132900333 | 128.4955142 |
| 21 | H08 | 26295 | CG15480 | 14.59335    | 0.130248333 | 112.0425085 |
| 21 | H09 | 25713 | CG15552 | 17.41199    | 0.129567667 | 134.3853019 |
| 21 | H10 | 26330 | CG15475 | 14.57451    | 0.134744333 | 108.1641776 |
| 21 | H11 | 25759 | CG12535 | 15.00716    | 0.131395333 | 114.2137975 |
| 21 | H12 | 26339 | CG14864 | 14.46156    | 0.138862667 | 104.1428942 |
| 21 | H13 | 25711 | CG12507 | 16.05080667 | 0.143137667 | 112.13545   |
| 21 | H14 | 26279 | CG14843 | 16.58842    | 0.137629    | 120.5299755 |
| 21 | H15 | 25692 | CG12609 | 15.94800333 | 0.146333667 | 108.9838292 |
| 21 | H16 | 26287 | CG32381 | 15.32770667 | 0.145217333 | 105.550118  |
| 21 | H17 | 25691 | CG12587 | 15.68549    | 0.143011333 | 109.6800487 |
| 21 | H18 | 31356 | CG10174 | 9.951337333 | 0.146214667 | 68.05977513 |
| 21 | H19 | 30401 | CG5968  | 15.84418333 | 0.144122667 | 109.9354022 |
| 21 | H20 | 31377 | CG12154 | 15.39702    | 0.141860333 | 108.5364713 |
| 21 | H21 | 30414 | CG6052  | 17.07715    | 0.143634667 | 118.8929553 |
| 21 | H22 | 31355 | CG2871  | 16.90277    | 0.143435333 | 117.8424424 |
| 21 | H23 | 30439 | CG6096  | 18.18704333 | 0.141564333 | 128.4719315 |
| 21 | H24 | 31349 | CG2209  | 17.56425333 | 0.142924    | 122.8922598 |
| 21 | I01 | 24865 | CG11099 | 11.02063967 | 0.060035667 | 183.5682067 |
| 21 | I02 | 30790 | CG9316  | 14.14264333 | 0.064944333 | 217.7656249 |
| 21 | I03 | 24860 | CG11329 | 16.27347    | 0.069192667 | 235.1906753 |
| 21 | I04 | 30792 | CG9406  | 11.80795633 | 0.066602333 | 177.2904303 |
| 21 | I05 | 24867 | CG11159 | 13.16860667 | 0.058839667 | 223.8049162 |
| 21 | I06 | 30751 | CG9159  | 10.62053133 | 0.131787333 | 80.58840759 |
| 21 | I07 | 24869 | CG11251 | 13.91222333 | 0.133245    | 104.4108472 |
| 21 | I08 | 30797 | CG9076  | 14.80029    | 0.141661333 | 104.4765685 |
| 21 | I09 | 24870 | CG11280 | 13.53298333 | 0.136298333 | 99.28942638 |
| 21 | I10 | 30796 | CG9029  | 11.10512333 | 0.139808    | 79.4312438  |
| 21 | I11 | 24862 | CG12092 | 11.91663333 | 0.143126    | 83.25973851 |

|    |     |       |         |             |             |             |
|----|-----|-------|---------|-------------|-------------|-------------|
| 21 | I12 | 20534 | CG7342  | 13.18396333 | 0.143752333 | 91.71303886 |
| 21 | I13 | 24864 | CG12204 | 13.23655    | 0.144712667 | 91.46780517 |
| 21 | I14 | 20556 | CG7283  | 1.232506    | 0.13612     | 9.054554805 |
| 21 | I15 | 24871 | CG11297 | 11.61029    | 0.146753    | 79.11449851 |
| 21 | I16 | 20557 | CG7319  | 14.72654    | 0.160176667 | 91.93935862 |
| 21 | I17 | 24863 | CG31146 | 12.51626233 | 0.152186667 | 82.24283117 |
| 21 | I18 | 20561 | CG8067  | 13.13450333 | 0.150147    | 87.47762748 |
| 21 | I19 | 30753 | CG8778  | 12.30386333 | 0.147775    | 83.26079062 |
| 21 | I20 | 20552 | CG7227  | 11.51274967 | 0.145889    | 78.91444637 |
| 21 | I21 | 30782 | CG8889  | 13.67360333 | 0.146047667 | 93.62425053 |
| 21 | I22 | 20582 | CG7361  | 7.366924333 | 0.142255667 | 51.7865088  |
| 21 | I23 | 30795 | CG8982  | 12.66355333 | 0.149789333 | 84.54242403 |
| 21 | I24 | 20511 | CG7376  | 14.46281    | 0.149354333 | 96.83555661 |
| 21 | J01 | 20555 | CG8264  | 1.784308333 | 0.046147667 | 38.66519073 |
| 21 | J02 | 30394 | CG6140  | 13.57005367 | 0.07047     | 192.5649733 |
| 21 | J03 | 20541 | CG8176  | 13.35112333 | 0.065466333 | 203.9387675 |
| 21 | J04 | 30432 | CG6302  | 12.99519333 | 0.06659     | 195.1523252 |
| 21 | J05 | 20563 | CG8129  | 12.71806667 | 0.066171    | 192.2000071 |
| 21 | J06 | 26274 | CG15538 | 12.186688   | 0.130737333 | 93.21505716 |
| 21 | J07 | 25700 | CG12521 | 12.33682333 | 0.141334    | 87.2884326  |
| 21 | J08 | 26327 | CG31306 | 12.76035    | 0.140827    | 90.61011028 |
| 21 | J09 | 25725 | CG12105 | 8.853922667 | 0.137688667 | 64.30393206 |
| 21 | J10 | 26304 | CG33207 | 13.70522    | 0.140620333 | 97.46257654 |
| 21 | J11 | 25730 | CG12273 | 9.991139333 | 0.147129667 | 67.90703438 |
| 21 | J12 | 26300 | CG15564 | 11.59973433 | 0.155037333 | 74.81897478 |
| 21 | J13 | 25727 | CG12594 | 13.96418333 | 0.146516333 | 95.30803164 |
| 21 | J14 | 26301 | CG15576 | 11.86349333 | 0.142020333 | 83.53376629 |
| 21 | J15 | 25731 | CG12347 | 14.91878333 | 0.150025667 | 99.44154    |
| 21 | J16 | 26310 | CG15545 | 13.11986667 | 0.144259    | 90.94660761 |
| 21 | J17 | 25761 | CG12585 | 13.17403    | 0.148042667 | 88.988062   |
| 21 | J18 | 31368 | CG10476 | 12.37469667 | 0.148615    | 83.26680797 |
| 21 | J19 | 30413 | CG5986  | 12.62301333 | 0.145148667 | 86.96609913 |
| 21 | J20 | 31397 | CG10965 | 13.04234333 | 0.147007    | 88.71919931 |
| 21 | J21 | 30451 | CG6104  | 12.58471367 | 0.150411333 | 83.66865307 |
| 21 | J22 | 31367 | CG2879  | 12.01570333 | 0.141661667 | 84.81972305 |
| 21 | J23 | 30422 | CG5804  | 12.95569    | 0.146039667 | 88.71350021 |
| 21 | J24 | 31382 | CG40051 | 11.27016    | 0.152257333 | 74.02047411 |
| 21 | K02 | 30768 | CG9397  | 16.49918667 | 0.067517333 | 244.3696434 |
| 21 | K03 | 24872 | CG11331 | 15.31367333 | 0.068701    | 222.9032086 |
| 21 | K04 | 30810 | CG9144  | 19.93907333 | 0.061228    | 325.6528603 |
| 21 | K05 | 24879 | CG11160 | 14.10361333 | 0.062557667 | 225.4497983 |
| 21 | K06 | 30763 | CG9162  | 15.15756667 | 0.067458333 | 224.695244  |
| 21 | K07 | 24881 | CG11253 | 13.66146333 | 0.134537    | 101.544284  |
| 21 | K08 | 30831 | CG8987  | 10.80498133 | 0.133418667 | 80.98552926 |
| 21 | K09 | 24882 | CG11281 | 13.81983333 | 0.132561333 | 104.2523712 |
| 21 | K1  | 24877 | CG11101 | 14.43927667 | 0.14282     | 101.101223  |
| 21 | K10 | 30812 | CG9271  | 15.55303333 | 0.142662667 | 109.0196454 |
| 21 | K11 | 24874 | CG12096 | 12.08429333 | 0.142719333 | 84.67173333 |
| 21 | K12 | 20546 | CG32091 | 15.24782667 | 0.148702    | 102.5394861 |
| 21 | K13 | 24876 | CG12212 | 14.20304    | 0.148574333 | 95.5955156  |
| 21 | K14 | 20568 | CG7289  | 10.84783367 | 0.144587667 | 75.02599576 |
| 21 | K15 | 24866 | CG11144 | 12.74680333 | 0.152341333 | 83.67265176 |
| 21 | K16 | 20569 | CG7329  | 15.33414333 | 0.148124667 | 103.5218757 |
| 21 | K17 | 24875 | CG12149 | 16.65167667 | 0.154919333 | 107.4861111 |

|    |     |       |                |             |             |             |
|----|-----|-------|----------------|-------------|-------------|-------------|
| 21 | K18 | 20573 | CG8070         | 6.633128    | 0.151037    | 43.91723882 |
| 21 | K19 | 30765 | CG8781         | 9.201965667 | 0.161510667 | 56.97435257 |
| 21 | K20 | 20564 | CG7231         | 16.80508667 | 0.150565333 | 111.6132532 |
| 21 | K21 | 30805 | CG8860         | 12.94119333 | 0.151032333 | 85.68491956 |
| 21 | K22 | 20572 | CG7436         | 12.75229333 | 0.149062333 | 85.55007189 |
| 21 | K23 | 30807 | CG8983         | 18.13127667 | 0.149657    | 121.1522125 |
| 21 | K24 | 20523 | CG7380         | 6.492777333 | 0.144841333 | 44.8268266  |
| 21 | L01 | 20567 | CG8266         | 20.76247667 | 0.066258667 | 313.3548819 |
| 21 | L02 | 30372 | CG6225         | 16.64331333 | 0.070859333 | 234.8782094 |
| 21 | L03 | 20542 | CG30090        | 13.15962333 | 0.062780333 | 209.6137856 |
| 21 | L04 | 30419 | CG6201         | 17.6676     | 0.068333667 | 258.5489827 |
| 21 | L05 | 20575 | CG8142         | 16.75803667 | 0.071476333 | 234.4557406 |
| 21 | L06 | 26317 | CG14911        | 15.29696667 | 0.134506333 | 113.726739  |
| 21 | L07 | 25726 | CG12552        | 17.93439667 | 0.128403333 | 139.6723605 |
| 21 | L08 | 26319 | CG15482,CG5547 | 14.56869    | 0.146485333 | 99.45493974 |
| 21 | L09 | 25736 | CG12114        | 15.27064333 | 0.143313    | 106.554488  |
| 21 | L10 | 26314 | CG31562        | 12.20237    | 0.147002333 | 83.00800214 |
| 21 | L11 | 25741 | CG12278        | 14.63697667 | 0.152184    | 96.17947134 |
| 21 | L12 | 26342 | CG15476        | 14.66646333 | 0.141022667 | 104.0007517 |
| 21 | L13 | 25745 | CG12486        | 15.60871333 | 0.149645    | 104.3049439 |
| 21 | L14 | 26346 | CG15549        | 14.14081667 | 0.145305333 | 97.31794658 |
| 21 | L15 | 25742 | CG12377        | 13.93014667 | 0.143079    | 97.35982686 |
| 21 | L16 | 26322 | CG15546        | 13.87052    | 0.153197333 | 90.54021828 |
| 21 | L17 | 25715 | CG12591        | 16.12199667 | 0.140920667 | 114.4047715 |
| 21 | L18 | 31380 | CG10533        | 13.57815667 | 0.146105333 | 92.93402477 |
| 21 | L19 | 30425 | CG5991         | 14.78088    | 0.143423667 | 103.0574684 |
| 21 | L20 | 31381 | CG11659        | 13.90311    | 0.150470333 | 92.39768194 |
| 21 | L21 | 30438 | CG6064         | 14.43641    | 0.121412    | 118.9043093 |
| 21 | L22 | 31378 | CG32498        | 14.98657667 | 0.144116    | 103.9896796 |
| 21 | L23 | 30441 | CG5683         | 18.38930667 | 0.145208    | 126.6411401 |
| 21 | L24 | 31373 | CG2227         | 18.84834667 | 0.142072667 | 132.6669451 |
| 21 | M01 | 24889 | CG11103        | 14.88092333 | 0.059999    | 248.0195225 |
| 21 | M02 | 30814 | CG9329         | 14.75031333 | 0.059145    | 249.3923972 |
| 21 | M03 | 24884 | CG11342        | 15.17788    | 0.057999333 | 261.6905941 |
| 21 | M04 | 30823 | CG9227         | 14.75530333 | 0.057664333 | 255.8826658 |
| 21 | M05 | 24891 | CG11162        | 14.50923333 | 0.059023    | 245.8233796 |
| 21 | M06 | 30815 | CG9378         | 13.84399    | 0.136564    | 101.3736417 |
| 21 | M07 | 24893 | CG11257        | 13.05721333 | 0.125737333 | 103.8451587 |
| 21 | M08 | 30821 | CG9083         | 14.01077667 | 0.134666    | 104.0409358 |
| 21 | M09 | 24894 | CG11282        | 18.05189    | 0.146729333 | 123.0285015 |
| 21 | M10 | 30824 | CG9277         | 14.83589    | 0.143874667 | 103.1167637 |
| 21 | M11 | 24886 | CG12113        | 28.66196    | 0.158261333 | 181.1052605 |
| 21 | M12 | 20558 | CG7357         | 16.68683333 | 0.149547    | 111.5825348 |
| 21 | M13 | 24888 | CG12214        | 16.90936    | 0.15133     | 111.7383202 |
| 21 | M14 | 20580 | CG7290         | 12.56294667 | 0.145972    | 86.06408535 |
| 21 | M15 | 24878 | CG11146        | 14.70152667 | 0.148939667 | 98.70793319 |
| 21 | M16 | 20581 | CG7332         | 15.60113    | 0.147956333 | 105.4441513 |
| 21 | M17 | 24887 | CG12161        | 17.09797    | 0.147604333 | 115.8365043 |
| 21 | M18 | 20585 | CG8073         | 15.22149    | 0.147258333 | 103.3658989 |
| 21 | M19 | 30830 | CG8932         | 13.83163    | 0.148786    | 92.96324923 |
| 21 | M20 | 20576 | CG7245         | 13.82534    | 0.143469    | 96.3646502  |
| 21 | M21 | 30806 | CG8902         | 22.49234667 | 0.163453333 | 137.6071458 |
| 21 | M22 | 20584 | CG7439         | 21.51337333 | 0.162335333 | 132.524281  |
| 21 | M23 | 30819 | CG8986         | 14.83672333 | 0.151157    | 98.15439135 |

|    |     |       |                 |             |             |             |
|----|-----|-------|-----------------|-------------|-------------|-------------|
| 21 | M24 | 20535 | CG7382          | 17.11309333 | 0.13843     | 123.6227215 |
| 21 | N01 | 20579 | CG8268          | 12.85508    | 0.070078667 | 183.4378508 |
| 21 | N02 | 30384 | CG6240          | 15.19695    | 0.062803667 | 241.9755216 |
| 21 | N03 | 20565 | CG8193          | 12.40294333 | 0.068396667 | 181.3384181 |
| 21 | N04 | 26294 | CG15468         | 14.03651333 | 0.066375333 | 211.4718319 |
| 21 | N05 | 20587 | CG8146          | 12.7007     | 0.062898    | 201.9253394 |
| 21 | N06 | 26298 | CG15541         | 13.25862    | 0.133223333 | 99.52175545 |
| 21 | N07 | 25724 | CG12525         | 11.94636333 | 0.134831667 | 88.60205936 |
| 21 | N08 | 26331 | CG15484         | 16.96125333 | 0.143025    | 118.5894308 |
| 21 | N09 | 25748 | CG12120         | 14.65101333 | 0.140812    | 104.0466248 |
| 21 | N10 | 26328 | CG14880,CG17931 | 12.45358333 | 0.138270667 | 90.06670492 |
| 21 | N11 | 25753 | CG12296         | 13.84577333 | 0.146314667 | 94.63011227 |
| 21 | N12 | 26332 | CG15499         | 14.20785333 | 0.144107667 | 98.59193242 |
| 21 | N13 | 25757 | CG12496         | 13.64329333 | 0.143128333 | 95.32210021 |
| 21 | N14 | 26315 | CG31330         | 17.14411    | 0.158672667 | 108.0470276 |
| 21 | N15 | 25728 | CG12621         | 14.57494667 | 0.142318333 | 102.4108864 |
| 21 | N16 | 26333 | CG31036         | 14.86385    | 0.147915    | 100.4891323 |
| 21 | N17 | 25729 | CG12193         | 15.16671667 | 0.146974667 | 103.1927271 |
| 21 | N18 | 31392 | CG10812         | 14.17022    | 0.148271    | 95.5697338  |
| 21 | N19 | 30433 | CG5751          | 17.05459333 | 0.142397333 | 119.7676455 |
| 21 | N20 | 31393 | CG1179          | 13.03089    | 0.154969    | 84.08707548 |
| 21 | N21 | 30450 | CG6071          | 13.51391333 | 0.143681333 | 94.05476007 |
| 21 | N22 | 31390 | CG12184         | 16.29789667 | 0.152910333 | 106.5846651 |
| 21 | N23 | 30446 | CG5814          | 14.61320333 | 0.152827333 | 95.61904284 |
| 21 | N24 | 31405 | CG12487         | 15.65019667 | 0.143107333 | 109.3598511 |
| 21 | O01 | 24901 | CG11105         | 8.477947667 | 0.280750667 | 30.19742666 |
| 21 | O02 | 30780 | CG9403          | 14.17398433 | 0.071722667 | 197.6221046 |
| 21 | O03 | 24892 | CG11200         | 13.74883667 | 0.06354     | 216.38081   |
| 21 | O04 | 30834 | CG9154          | 13.65464333 | 0.069952    | 195.2001849 |
| 21 | O05 | 24903 | CG11172         | 12.97286667 | 0.093496333 | 138.7526784 |
| 21 | O06 | 30787 | CG9196          | 14.83040667 | 0.145022667 | 102.2626808 |
| 21 | O07 | 24905 | CG11260         | 15.59845    | 0.139618    | 111.7223424 |
| 21 | O08 | 30835 | CG9238          | 16.65326667 | 0.138627667 | 120.1294595 |
| 21 | O09 | 24906 | CG11284         | 16.03001333 | 0.145996    | 109.79762   |
| 21 | O10 | 30832 | CG9046          | 13.14704333 | 0.145802667 | 90.17011577 |
| 21 | O11 | 24898 | CG12116         | 14.15596333 | 0.147763333 | 95.80159715 |
| 21 | O12 | 20570 | CG7360          | 7.184966667 | 0.137547667 | 52.23619448 |
| 21 | O13 | 24902 | CG11148         | 14.48992    | 0.151565333 | 95.60180868 |
| 21 | O14 | 20592 | CG7298          | 11.98536333 | 0.145424    | 82.41668042 |
| 21 | O15 | 24907 | CG11319         | 15.5616     | 0.159111    | 97.80342025 |
| 21 | O16 | 20593 | CG7334          | 14.39393333 | 0.146913333 | 97.97567727 |
| 21 | O17 | 24899 | CG12170         | 15.48241333 | 0.143063    | 108.2209469 |
| 21 | O18 | 20597 | CG8075          | 12.85765667 | 0.148306333 | 86.69661219 |
| 21 | O19 | 30789 | CG8799          | 12.88596    | 0.155329333 | 82.95896032 |
| 21 | O20 | 20588 | CG7246          | 9.673408    | 0.149593333 | 64.66469985 |
| 21 | O21 |       | wtg             | 59.95046667 | 0.142419667 | 420.9423324 |
| 21 | O22 |       | HFA17794        | 1.475954333 | 0.108475    | 13.60640086 |
| 21 | O23 |       | hpo             | 42.93707667 | 0.142902    | 300.4651906 |
| 21 | O24 |       | Luc             | 2.285559667 | 0.142016667 | 16.09360169 |
| 21 | P01 | 20591 | CG8270          | 13.22081    | 0.089649667 | 147.4719371 |
| 21 | P02 | 30430 | CG6180          | 11.93710367 | 0.073966333 | 161.3856349 |
| 21 | P03 | 20577 | CG8194          | 11.93794    | 0.068906667 | 173.2479683 |
| 21 | P04 | 26306 | CG15472         | 11.92059    | 0.069110333 | 172.4863624 |
| 21 | P05 | 20599 | CG8151          | 21.56860333 | 0.154253    | 139.8261514 |

|    |     |       |                 |             |             |             |
|----|-----|-------|-----------------|-------------|-------------|-------------|
| 21 | P06 | 26341 | CG14914         | 13.28243    | 0.141826    | 93.65299733 |
| 21 | P07 | 25735 | CG12526         | 12.68491333 | 0.137596333 | 92.18932675 |
| 21 | P08 | 26343 | CG12287         | 14.24971333 | 0.139940333 | 101.8270644 |
| 21 | P09 | 25769 | CG12517,CG31723 | 13.79231333 | 0.137865    | 100.0421669 |
| 21 | P10 | 26340 | CG14883         | 11.17999067 | 0.139543333 | 80.11841483 |
| 21 | P11 | 25765 | CG12303         | 12.15093667 | 0.147870333 | 82.17291726 |
| 21 | P12 | 26344 | CG15503         | 13.23303667 | 0.150388667 | 87.99224676 |
| 21 | P13 | 25758 | CG12516         | 13.40945    | 0.152481667 | 87.94139186 |
| 21 | P14 | 26337 | CG15579         | 11.44549067 | 0.146911    | 77.9076493  |
| 21 | P15 | 25766 | CG12386         | 14.24687333 | 0.162087    | 87.8964589  |
| 21 | P16 | 26335 | CG14837         | 13.70858667 | 0.149188333 | 91.88779283 |
| 21 | P17 | 25767 | CG12426         | 14.18333667 | 0.152178667 | 93.20187236 |
| 21 | P18 | 31403 | CG11091         | 8.854259    | 0.14816     | 59.76146733 |
| 21 | P19 | 30445 | CG5762          | 14.67011667 | 0.149389333 | 98.20056318 |
| 21 | P20 | 31404 | CG1180          | 14.13577667 | 0.144383    | 97.90471639 |
| 21 | P21 |       | wts             | 54.42004333 | 0.143149    | 380.163629  |
| 21 | P22 |       | HFA17794        | 1.265443667 | 0.113675    | 11.13211935 |
| 21 | P23 |       | hpo             | 45.10318    | 0.142693333 | 316.0847038 |
| 21 | P24 |       | Luc             | 2.510825667 | 0.142521667 | 17.61715061 |
| 22 | A01 |       | DIAP1           | 0.433904    | 0.021276667 | 20.39342002 |
| 22 | A02 |       | ex/ft           | 39.92538667 | 0.052765333 | 756.6594229 |
| 22 | A03 |       | Luc             | 1.902357333 | 0.057937333 | 32.83474098 |
| 22 | A04 |       | hpo             | 30.62757667 | 0.051694667 | 592.4707255 |
| 22 | A05 | 31324 | CG13044         | 13.37536067 | 0.054685333 | 244.587714  |
| 22 | A06 | 32508 | CG10364         | 11.01479367 | 0.053905    | 204.3371425 |
| 22 | A07 | 31335 | CG12506         | 12.48222333 | 0.060935333 | 204.8437688 |
| 22 | A08 | 32516 | CG11137         | 11.05187933 | 0.058102667 | 190.2129449 |
| 22 | A09 | 21846 | CG7177          | 8.140044    | 0.053793333 | 151.3206841 |
| 22 | A10 | 32524 | CG11555         | 10.54763233 | 0.053053333 | 198.8118686 |
| 22 | A11 | 21853 | CG6297          | 9.843717333 | 0.055999667 | 175.781713  |
| 22 | A12 | 32532 | CG12126         | 13.02372333 | 0.058286667 | 223.4425826 |
| 22 | A13 | 21849 | CG5026          | 12.07095    | 0.053627667 | 225.0881075 |
| 22 | A14 | 32540 | CG12505         | 8.142143667 | 0.042530333 | 191.4432131 |
| 22 | A15 | 21860 | CG4803          | 11.86431667 | 0.048453    | 244.8623752 |
| 22 | A16 | 32548 | CG13021         | 10.88757167 | 0.050048    | 217.5425924 |
| 22 | A17 | 21864 | CG6025          | 11.40164167 | 0.052655667 | 216.5320921 |
| 22 | A18 | 32556 | CG13245         | 12.59335667 | 0.051708    | 243.5475491 |
| 22 | A19 | 21867 | CG6811          | 11.38123333 | 0.056922667 | 199.9420266 |
| 22 | A20 | 32564 | CG13511         | 11.04136467 | 0.047828    | 230.8556633 |
| 22 | A21 | 21863 | CG5719          | 12.96523    | 0.048353333 | 268.1351854 |
| 22 | A22 | 32588 | CG14763         | 14.72962667 | 0.044375667 | 331.9302621 |
| 22 | A23 | 21931 | CG31110         | 14.39305667 | 0.054822    | 262.5416195 |
| 22 | A24 | 32595 | CG14937         | 14.23921333 | 0.052270333 | 272.4148178 |
| 22 | B01 |       | DIAP1           | 0.438547    | 0.023616333 | 18.56964812 |
| 22 | B02 |       | ex/ft           | 36.96555333 | 0.065395667 | 565.2599815 |
| 22 | B03 |       | Luc             | 1.787015667 | 0.066204667 | 26.99229158 |
| 22 | B04 |       | hpo             | 42.43699    | 0.062910667 | 674.5595342 |
| 22 | B05 | 32628 | CG17148         | 13.67748333 | 0.058352333 | 234.3947971 |
| 22 | B06 | 32700 | CG31817         | 11.35908833 | 0.057078    | 199.0099221 |
| 22 | B07 | 32636 | CG17950         | 5.468722    | 0.053138333 | 102.9148198 |
| 22 | B08 | 32708 | CG32038         | 13.69690333 | 0.060652333 | 225.8264865 |
| 22 | B09 | 32652 | CG30061         | 12.41863333 | 0.058786333 | 211.2503473 |
| 22 | B10 | 32716 | CG32227         | 13.46119333 | 0.058309    | 230.8596157 |
| 22 | B11 | 32660 | CG30179         | 13.59492667 | 0.055647333 | 244.305088  |

|    |     |       |         |             |             |             |
|----|-----|-------|---------|-------------|-------------|-------------|
| 22 | B12 | 32724 | CG32440 | 10.472996   | 0.054122667 | 193.5048039 |
| 22 | B13 | 32676 | CG3109  | 12.15981233 | 0.066111667 | 183.9283888 |
| 22 | B14 | 32732 | CG32715 | 10.19281667 | 0.047647333 | 213.9220803 |
| 22 | B15 | 32684 | CG31344 | 13.18059333 | 0.053473    | 246.4906277 |
| 22 | B16 | 32740 | CG32988 | 11.88016633 | 0.051751    | 229.5639955 |
| 22 | B17 | 32604 | CG15404 | 12.42954    | 0.052942667 | 234.7735916 |
| 22 | B18 | 32748 | CG33117 | 7.366288667 | 0.051382    | 143.3632141 |
| 22 | B19 | 32612 | CG15675 | 13.45646    | 0.047519667 | 283.1766497 |
| 22 | B20 | 32756 | CG33197 | 12.304556   | 0.055217667 | 222.8373045 |
| 22 | B21 | 32668 | CG30423 | 14.17882667 | 0.044457333 | 318.93111   |
| 22 | B22 | 32765 | CG40301 | 12.30358333 | 0.04913     | 250.4291336 |
| 22 | B23 | 32692 | CG31682 | 12.23229333 | 0.049976333 | 244.7617205 |
| 22 | B24 | 32779 | CG4930  | 13.90502    | 0.051611    | 269.4196974 |
| 22 | C01 | 31328 | CG15381 | 14.90473667 | 0.052340333 | 284.7657957 |
| 22 | C02 | 32580 | CG14367 | 13.09114    | 0.057488    | 227.7195241 |
| 22 | C03 | 31327 | CG14143 | 15.07556667 | 0.056115    | 268.6548457 |
| 22 | C04 | 32572 | CG14110 | 13.40759667 | 0.052516667 | 255.3017455 |
| 22 | C05 | 31406 | CG13041 | 12.31975333 | 0.050228    | 245.2766053 |
| 22 | C06 | 32509 | CG10371 | 14.86446333 | 0.052854667 | 281.2327514 |
| 22 | C07 | 31347 | CG1252  | 14.16864333 | 0.055980333 | 253.1003745 |
| 22 | C08 | 32517 | CG11165 | 16.52236    | 0.059070667 | 279.7049861 |
| 22 | C09 | 21858 | CG7180  | 15.66270667 | 0.049255333 | 317.9900654 |
| 22 | C10 | 32525 | CG11635 | 14.98732333 | 0.049207333 | 304.5749956 |
| 22 | C11 | 21865 | CG6355  | 14.87712667 | 0.05153     | 288.7080665 |
| 22 | C12 | 32533 | CG12159 | 17.31164    | 0.059701333 | 289.9707433 |
| 22 | C13 | 21861 | CG5072  | 8.793221667 | 0.0425      | 206.8993333 |
| 22 | C14 | 32541 | CG12659 | 15.48257667 | 0.059280333 | 261.1756007 |
| 22 | C15 | 21872 | CG4839  | 14.49065333 | 0.051010333 | 284.0729003 |
| 22 | C16 | 32549 | CG13031 | 13.32443333 | 0.052309667 | 254.7221992 |
| 22 | C17 | 21876 | CG6027  | 16.74416667 | 0.047638333 | 351.4851485 |
| 22 | C18 | 32557 | CG13307 | 13.91595    | 0.043491667 | 319.9681931 |
| 22 | C19 | 21879 | CG6899  | 17.14558    | 0.050767333 | 337.7285919 |
| 22 | C20 | 32565 | CG13612 | 17.08394    | 0.047971    | 356.1305789 |
| 22 | C21 | 21875 | CG5790  | 16.98949667 | 0.048351667 | 351.373548  |
| 22 | C22 | 32589 | CG14778 | 18.03333667 | 0.048824667 | 369.3488947 |
| 22 | C23 | 32500 | CG10063 | 15.87309333 | 0.045543667 | 348.5247125 |
| 22 | C24 | 32596 | CG14957 | 18.89666333 | 0.044381    | 425.7827298 |
| 22 | D01 | 32644 | CG2151  | 7.689721667 | 0.068706667 | 111.9210411 |
| 22 | D02 | 32772 | CG4337  | 16.0266     | 0.059006    | 271.6096668 |
| 22 | D03 | 32620 | CG16783 | 17.4381     | 0.076075    | 229.2224778 |
| 22 | D04 | 32780 | CG5180  | 16.16443    | 0.054632333 | 295.8766176 |
| 22 | D05 | 32629 | CG17173 | 12.52085667 | 0.065748667 | 190.4351419 |
| 22 | D06 | 32701 | CG31818 | 16.5575     | 0.056789667 | 291.5583234 |
| 22 | D07 | 32637 | CG17977 | 16.28961333 | 0.058142333 | 280.1678639 |
| 22 | D08 | 32709 | CG32084 | 10.893148   | 0.054688667 | 199.1847427 |
| 22 | D09 | 32653 | CG30067 | 13.81151333 | 0.069639    | 198.3301503 |
| 22 | D10 | 32717 | CG32238 | 13.32322    | 0.047442333 | 280.8297793 |
| 22 | D11 | 32661 | CG30181 | 14.01643667 | 0.054415333 | 257.5824829 |
| 22 | D12 | 32725 | CG32463 | 14.17889667 | 0.045489667 | 311.6948904 |
| 22 | D13 | 32677 | CG31147 | 16.14071    | 0.055142667 | 292.7081872 |
| 22 | D14 | 32733 | CG32808 | 13.37990333 | 0.051956667 | 257.5204337 |
| 22 | D15 | 32685 | CG31392 | 15.77592667 | 0.046747667 | 337.4698202 |
| 22 | D16 | 32741 | CG33002 | 11.15116967 | 0.049416667 | 225.6560472 |
| 22 | D17 | 32605 | CG15442 | 1.029313333 | 0.039751    | 25.89402363 |

|    |     |       |         |             |             |             |
|----|-----|-------|---------|-------------|-------------|-------------|
| 22 | D18 | 32749 | CG33150 | 13.05183333 | 0.050947    | 256.1845316 |
| 22 | D19 | 32613 | CG15701 | 13.98526667 | 0.045703    | 306.0032529 |
| 22 | D20 | 32757 | CG3354  | 15.68104    | 0.048567    | 322.8743797 |
| 22 | D21 | 32669 | CG30464 | 15.75373333 | 0.046946    | 335.5713657 |
| 22 | D22 | 32766 | CG4043  | 12.17823667 | 0.044758333 | 272.0886986 |
| 22 | D23 | 32693 | CG31691 | 16.19670333 | 0.045039    | 359.6150743 |
| 22 | D24 | 32787 | CG5388  | 14.59580333 | 0.047786333 | 305.4388633 |
| 22 | E01 | 31362 | CG1367  | 23.17821    | 0.056929667 | 407.1376377 |
| 22 | E02 | 32581 | CG14479 | 18.66207333 | 0.050644    | 368.4952479 |
| 22 | E03 | 31374 | CG13673 | 4.482231667 | 0.055006333 | 81.48573801 |
| 22 | E04 | 32573 | CG14111 | 21.96760667 | 0.059803333 | 367.3308065 |
| 22 | E05 | 31348 | CG13063 | 18.23266    | 0.050697667 | 359.6350917 |
| 22 | E06 | 32510 | CG10375 | 18.91358333 | 0.052272    | 361.8301066 |
| 22 | E07 | 31398 | CG13679 | 19.18038667 | 0.050343667 | 380.9890685 |
| 22 | E08 | 32518 | CG11177 | 18.75724333 | 0.051623667 | 363.3458168 |
| 22 | E09 | 21870 | CG7223  | 15.16475667 | 0.052495667 | 288.8763517 |
| 22 | E10 | 32526 | CG11674 | 18.70640667 | 0.047368333 | 394.913761  |
| 22 | E11 | 21877 | CG6386  | 11.359925   | 0.046108667 | 246.37288   |
| 22 | E12 | 32534 | CG12225 | 2.521429    | 0.039943333 | 63.1251523  |
| 22 | E13 | 21873 | CG5092  | 6.651944    | 0.040012333 | 166.2473404 |
| 22 | E14 | 32542 | CG12752 | 9.114595333 | 0.0467      | 195.1733476 |
| 22 | E15 | 21884 | CG4853  | 20.08233333 | 0.041500333 | 483.9077598 |
| 22 | E16 | 32550 | CG13042 | 17.32686    | 0.044586    | 388.6166061 |
| 22 | E17 | 21888 | CG6036  | 17.82348333 | 0.043265667 | 411.9544365 |
| 22 | E18 | 32558 | CG13339 | 17.77398667 | 0.048063333 | 369.8034538 |
| 22 | E19 | 21891 | CG6963  | 10.879076   | 0.045990667 | 236.5496478 |
| 22 | E20 | 32566 | CG13667 | 15.36597333 | 0.048120333 | 319.3239171 |
| 22 | E21 | 21929 | CG7156  | 15.15728    | 0.046347    | 327.0390748 |
| 22 | E22 | 32590 | CG14797 | 17.21689333 | 0.044181    | 389.6899874 |
| 22 | E23 | 32501 | CG10075 | 21.66893    | 0.04564     | 474.7793602 |
| 22 | E24 | 32597 | CG14990 | 19.47185333 | 0.044156333 | 440.9753225 |
| 22 | F01 | 32645 | CG2297  | 16.29988333 | 0.054058    | 301.5258303 |
| 22 | F02 | 32773 | CG4426  | 19.08631667 | 0.069263333 | 275.5616247 |
| 22 | F03 | 32621 | CG16896 | 19.16872    | 0.059837    | 320.348948  |
| 22 | F04 | 32781 | CG5184  | 15.35703    | 0.056509    | 271.7625511 |
| 22 | F05 | 32630 | CG17217 | 17.45247    | 0.051388333 | 339.619304  |
| 22 | F06 | 32702 | CG31820 | 17.46133667 | 0.053162667 | 328.451106  |
| 22 | F07 | 32638 | CG17996 | 19.30569    | 0.053152667 | 363.2120684 |
| 22 | F08 | 32710 | CG32086 | 16.77954    | 0.050888    | 329.7347115 |
| 22 | F09 | 32654 | CG30070 | 16.88795    | 0.052286    | 322.9918143 |
| 22 | F10 | 32718 | CG32242 | 20.08277667 | 0.048976    | 410.0534275 |
| 22 | F11 | 32662 | CG30185 | 16.70140667 | 0.055116333 | 303.0210041 |
| 22 | F12 | 32726 | CG32536 | 15.89597    | 0.051052333 | 311.3661798 |
| 22 | F13 | 32678 | CG31155 | 7.410885333 | 0.037663333 | 196.7665811 |
| 22 | F14 | 32734 | CG32829 | 14.64491333 | 0.042358667 | 345.7359375 |
| 22 | F15 | 32686 | CG31418 | 15.73826667 | 0.045713    | 344.2842663 |
| 22 | F16 | 32742 | CG33003 | 16.78334333 | 0.043855667 | 382.6949767 |
| 22 | F17 | 32606 | CG15482 | 17.66895667 | 0.045510667 | 388.2377025 |
| 22 | F18 | 32750 | CG33151 | 16.20015333 | 0.045874333 | 353.1419893 |
| 22 | F19 | 32614 | CG15742 | 15.45319333 | 0.042932667 | 359.9402165 |
| 22 | F20 | 32758 | CG3513  | 16.47903    | 0.045148667 | 364.9948319 |
| 22 | F21 | 32670 | CG30468 | 17.36823333 | 0.044428667 | 390.924028  |
| 22 | F22 | 32767 | CG4124  | 12.32024333 | 0.048802    | 252.4536563 |
| 22 | F23 | 32694 | CG31698 | 15.40976667 | 0.048232333 | 319.4903834 |



|    |     |       |         |             |             |             |
|----|-----|-------|---------|-------------|-------------|-------------|
| 22 | F24 | 32788 | CG5479  | 18.85199333 | 0.039784    | 473.8586702 |
| 22 | G01 | 31352 | CG15489 | 17.47455    | 0.052943333 | 330.0613864 |
| 22 | G02 | 32582 | CG14514 | 14.80426333 | 0.061052667 | 242.4834842 |
| 22 | G03 | 31351 | CG14374 | 19.15686    | 0.054420667 | 352.0144308 |
| 22 | G04 | 32574 | CG14174 | 20.27937333 | 0.055543333 | 365.109044  |
| 22 | G05 | 31360 | CG13066 | 21.41733333 | 0.050247667 | 426.2353807 |
| 22 | G06 | 32511 | CG10681 | 18.27884667 | 0.054158667 | 337.5054777 |
| 22 | G07 | 31371 | CG12798 | 24.93385667 | 0.05353     | 465.7922037 |
| 22 | G08 | 32519 | CG11205 | 19.46600333 | 0.053942    | 360.8691434 |
| 22 | G09 | 21882 | CG7236  | 17.07969333 | 0.045163    | 378.1788928 |
| 22 | G10 | 32527 | CG11763 | 18.32890667 | 0.048762667 | 375.8799081 |
| 22 | G11 | 21889 | CG6498  | 25.90241667 | 0.055289667 | 468.4856724 |
| 22 | G12 | 32535 | CG12253 | 21.68148667 | 0.047115333 | 460.1789934 |
| 22 | G13 | 21904 | CG31711 | 22.23941    | 0.045676    | 486.8948682 |
| 22 | G14 | 32543 | CG12895 | 19.12491333 | 0.043167333 | 443.041343  |
| 22 | G15 | 21896 | CG4921  | 20.55246667 | 0.048972    | 419.6779112 |
| 22 | G16 | 32551 | CG13057 | 21.6643     | 0.048807667 | 443.87084   |
| 22 | G17 | 21900 | CG6114  | 18.22596333 | 0.042327    | 430.5989873 |
| 22 | G18 | 32559 | CG13418 | 19.47194333 | 0.045095    | 431.7982777 |
| 22 | G19 | 21903 | CG7001  | 23.20158333 | 0.047331    | 490.1984605 |
| 22 | G20 | 32567 | CG13690 | 19.34602667 | 0.047438    | 407.8170805 |
| 22 | G21 | 21899 | CG5937  | 19.79104667 | 0.041939333 | 471.8970259 |
| 22 | G22 | 32591 | CG14839 | 14.62971667 | 0.043182    | 338.7920121 |
| 22 | G23 | 32502 | CG10137 | 21.64659    | 0.043988333 | 492.0984352 |
| 22 | G24 | 32598 | CG15043 | 19.09689667 | 0.043096333 | 443.1211472 |
| 22 | H01 | 32646 | CG2970  | 18.61429333 | 0.051564    | 360.9939751 |
| 22 | H02 | 32774 | CG4437  | 15.65116    | 0.053945667 | 290.1282154 |
| 22 | H03 | 32622 | CG16982 | 12.27396    | 0.047927    | 256.0969808 |
| 22 | H04 | 32782 | CG5232  | 19.00889333 | 0.053811667 | 353.248552  |
| 22 | H05 | 32631 | CG17275 | 19.52889333 | 0.053553333 | 364.6625171 |
| 22 | H06 | 32703 | CG31842 | 16.06800333 | 0.053517333 | 300.2392371 |
| 22 | H07 | 32639 | CG18042 | 14.38370667 | 0.050756    | 283.3892873 |
| 22 | H08 | 32711 | CG32136 | 16.74971667 | 0.048150333 | 347.8629431 |
| 22 | H09 | 32655 | CG30074 | 18.38620333 | 0.050637    | 363.0981957 |
| 22 | H10 | 32719 | CG32253 | 6.195272    | 0.051463333 | 120.3822527 |
| 22 | H11 | 32663 | CG30324 | 18.84523333 | 0.046521    | 405.0908909 |
| 22 | H12 | 32727 | CG32537 | 14.98688667 | 0.047483667 | 315.6219332 |
| 22 | H13 | 32679 | CG31157 | 17.56872333 | 0.053807667 | 326.5096671 |
| 22 | H14 | 32735 | CG32832 | 17.30738    | 0.047836    | 361.8065892 |
| 22 | H15 | 32687 | CG31419 | 15.48728667 | 0.041192667 | 375.9719368 |
| 22 | H16 | 32743 | CG33054 | 13.61347667 | 0.045617667 | 298.4255369 |
| 22 | H17 | 32607 | CG15517 | 17.36914    | 0.041394    | 419.6052568 |
| 22 | H18 | 32751 | CG33169 | 15.82444    | 0.044030333 | 359.3985964 |
| 22 | H19 | 32615 | CG15779 | 18.70344    | 0.049382333 | 378.7475953 |
| 22 | H20 | 32759 | CG3624  | 17.49810333 | 0.042966667 | 407.248332  |
| 22 | H21 | 32675 | CG31084 | 20.42275    | 0.037108667 | 550.3498733 |
| 22 | H22 | 32768 | CG4182  | 10.463084   | 0.04307     | 242.9320641 |
| 22 | H23 | 32695 | CG31744 | 18.89619    | 0.041171    | 458.9684487 |
| 22 | H24 | 32789 | CG5506  | 22.07942667 | 0.040867333 | 540.2707949 |
| 22 | I01 | 31364 | CG15494 | 14.38022667 | 0.0646      | 222.604128  |
| 22 | I02 | 32583 | CG14540 | 15.24135    | 0.058075333 | 262.4410249 |
| 22 | I03 | 31363 | CG14377 | 17.76226    | 0.056240667 | 315.8259148 |
| 22 | I04 | 32575 | CG14210 | 9.281101667 | 0.05454     | 170.1705476 |
| 22 | I05 | 31372 | CG13069 | 11.75319    | 0.055876    | 210.3441549 |

|    |     |       |         |             |             |             |
|----|-----|-------|---------|-------------|-------------|-------------|
| 22 | I06 | 32512 | CG10685 | 6.527484667 | 0.072129    | 90.49736814 |
| 22 | I07 | 31383 | CG12842 | 15.95967    | 0.058702    | 271.876086  |
| 22 | I08 | 32520 | CG11411 | 17.60066333 | 0.054359333 | 323.7836495 |
| 22 | I09 | 21894 | CG7323  | 13.7168     | 0.064830333 | 211.5799703 |
| 22 | I10 | 32528 | CG11777 | 13.01043    | 0.057649    | 225.6835331 |
| 22 | I11 | 21886 | CG5522  | 12.26237    | 0.056134333 | 218.4468804 |
| 22 | I12 | 32536 | CG12400 | 13.74212333 | 0.055408333 | 248.015461  |
| 22 | I13 | 21897 | CG5179  | 5.856993    | 0.043975667 | 133.1871338 |
| 22 | I14 | 32544 | CG12905 | 16.15824667 | 0.046962    | 344.0706671 |
| 22 | I15 | 21908 | CG4926  | 15.87252    | 0.048258667 | 328.9050671 |
| 22 | I16 | 32552 | CG13087 | 15.0071     | 0.051972333 | 288.7517076 |
| 22 | I17 | 21912 | CG6117  | 17.25585333 | 0.050062    | 344.6896515 |
| 22 | I18 | 32560 | CG13437 | 15.26396667 | 0.050191333 | 304.1155844 |
| 22 | I19 | 21914 | CG32134 | 15.49152667 | 0.046805667 | 330.9754517 |
| 22 | I20 | 32568 | CG13837 | 13.65479667 | 0.049486667 | 275.9288024 |
| 22 | I21 | 21878 | CG6622  | 15.65900333 | 0.050586    | 309.5521159 |
| 22 | I22 | 32587 | CG14710 | 12.33477    | 0.047529667 | 259.5172839 |
| 22 | I23 | 32503 | CG10154 | 15.24485667 | 0.044215333 | 344.7866502 |
| 22 | I24 | 32599 | CG15048 | 15.81467    | 0.041867333 | 377.7329183 |
| 22 | J01 | 32647 | CG2986  | 1.999520333 | 0.056965    | 35.10085725 |
| 22 | J02 | 32775 | CG4455  | 11.78332333 | 0.068023    | 173.2255757 |
| 22 | J03 | 32623 | CG16985 | 11.09346667 | 0.059334    | 186.9664386 |
| 22 | J04 | 32783 | CG5280  | 9.509646333 | 0.056164333 | 169.3182447 |
| 22 | J05 | 32632 | CG17404 | 11.39917667 | 0.058398667 | 195.1958378 |
| 22 | J06 | 32704 | CG31875 | 10.95284667 | 0.056188667 | 194.9298198 |
| 22 | J07 | 32640 | CG18146 | 13.56928333 | 0.064977    | 208.8320996 |
| 22 | J08 | 32712 | CG32160 | 11.63202667 | 0.048288    | 240.8885575 |
| 22 | J09 | 32656 | CG30099 | 13.74997667 | 0.0565      | 243.3624189 |
| 22 | J10 | 32720 | CG32255 | 14.32145667 | 0.052185667 | 274.4327625 |
| 22 | J11 | 32664 | CG30365 | 13.58041333 | 0.048415333 | 280.4981893 |
| 22 | J12 | 32728 | CG32576 | 10.779414   | 0.052708667 | 204.509328  |
| 22 | J13 | 32680 | CG31231 | 14.55035    | 0.059452667 | 244.7383913 |
| 22 | J14 | 32736 | CG32833 | 11.87028667 | 0.055691    | 213.1455112 |
| 22 | J15 | 32688 | CG31463 | 14.66885333 | 0.050421333 | 290.9255342 |
| 22 | J16 | 32744 | CG33056 | 11.74049667 | 0.047282667 | 248.3044527 |
| 22 | J17 | 32608 | CG15527 | 14.53497333 | 0.05085     | 285.8401835 |
| 22 | J18 | 32752 | CG33170 | 13.482      | 0.045281667 | 297.7363907 |
| 22 | J19 | 32616 | CG15863 | 11.97541    | 0.053455667 | 224.02508   |
| 22 | J20 | 32760 | CG3712  | 13.98236    | 0.049168667 | 284.3754152 |
| 22 | J21 | 32672 | CG3058  | 10.46245833 | 0.053958    | 193.9000395 |
| 22 | J22 | 32769 | CG4211  | 12.32555    | 0.062005667 | 198.7810254 |
| 22 | J23 | 32696 | CG31748 | 13.76292333 | 0.051379667 | 267.8671199 |
| 22 | J24 | 32790 | CG5516  | 15.21136333 | 0.043356667 | 350.8425463 |
| 22 | K02 | 32584 | CG14561 | 16.39073333 | 0.065839333 | 248.9504754 |
| 22 | K03 | 31375 | CG40105 | 13.93923333 | 0.057363    | 243.0004242 |
| 22 | K04 | 32576 | CG14212 | 14.69710333 | 0.065846667 | 223.2019338 |
| 22 | K05 | 31338 | CG13589 | 10.96847167 | 0.052677    | 208.2212667 |
| 22 | K06 | 32513 | CG10700 | 14.49406    | 0.060042333 | 241.3973474 |
| 22 | K07 | 21869 | CG7097  | 11.87507    | 0.05955     | 199.4134341 |
| 22 | K08 | 32521 | CG11417 | 17.37483333 | 0.053468667 | 324.9535554 |
| 22 | K09 | 21895 | CG7576  | 12.37379133 | 0.065813333 | 188.0134421 |
| 22 | K1  | 31376 | CG15507 | 15.01298    | 0.056026667 | 267.9613279 |
| 22 | K10 | 32529 | CG12005 | 12.07328933 | 0.049860333 | 242.1421705 |
| 22 | K11 | 21913 | CG6535  | 13.06886    | 0.055594333 | 235.0753974 |

|    |     |       |         |             |             |             |
|----|-----|-------|---------|-------------|-------------|-------------|
| 22 | K12 | 32537 | CG12403 | 11.917771   | 0.055137667 | 216.1457262 |
| 22 | K13 | 21909 | CG5182  | 12.86519    | 0.056408667 | 228.0711593 |
| 22 | K14 | 32545 | CG12918 | 15.56480667 | 0.051019667 | 305.0746444 |
| 22 | K15 | 21920 | CG4945  | 17.96491333 | 0.056584667 | 317.4873052 |
| 22 | K16 | 32553 | CG13144 | 16.27934333 | 0.053580333 | 303.8305722 |
| 22 | K17 | 21924 | CG6238  | 16.95589333 | 0.052144333 | 325.1723102 |
| 22 | K18 | 32561 | CG13445 | 15.38979667 | 0.048592667 | 316.7102718 |
| 22 | K19 | 21927 | CG7028  | 12.92631333 | 0.051229333 | 252.3224975 |
| 22 | K20 | 32569 | CG13884 | 14.14561    | 0.054975667 | 257.3067478 |
| 22 | K21 | 21890 | CG6682  | 14.08626667 | 0.054945667 | 256.3671991 |
| 22 | K22 | 32593 | CG14871 | 14.36775    | 0.046715667 | 307.5574218 |
| 22 | K23 | 32504 | CG10203 | 14.99452    | 0.043222    | 346.9186988 |
| 22 | K24 | 32600 | CG15191 | 18.35523667 | 0.042458333 | 432.3117566 |
| 22 | L01 | 32648 | CG30016 | 18.58379    | 0.064210333 | 289.4205502 |
| 22 | L02 | 32776 | CG4755  | 21.10064333 | 0.062617667 | 336.9758801 |
| 22 | L03 | 32602 | CG15382 | 18.51466    | 0.053621    | 345.2874807 |
| 22 | L04 | 32784 | CG5303  | 14.81367333 | 0.060145    | 246.2993322 |
| 22 | L05 | 32633 | CG17717 | 15.44350667 | 0.062114667 | 248.6289872 |
| 22 | L06 | 32705 | CG31974 | 11.94001033 | 0.059142333 | 201.8860207 |
| 22 | L07 | 32641 | CG18508 | 15.86152333 | 0.055067333 | 288.0387041 |
| 22 | L08 | 32713 | CG32177 | 16.47302    | 0.062741333 | 262.5545095 |
| 22 | L09 | 32657 | CG30128 | 14.80914667 | 0.056924    | 260.1564659 |
| 22 | L10 | 32721 | CG32284 | 17.62635333 | 0.053031333 | 332.3762053 |
| 22 | L11 | 32665 | CG30376 | 15.41604    | 0.050724333 | 303.9180407 |
| 22 | L12 | 32729 | CG32578 | 16.95300333 | 0.057644667 | 294.0949148 |
| 22 | L13 | 32681 | CG31236 | 10.85002333 | 0.053492333 | 202.8332409 |
| 22 | L14 | 32737 | CG32834 | 16.17339667 | 0.049784    | 324.8713777 |
| 22 | L15 | 32689 | CG31464 | 16.27972333 | 0.052783667 | 308.4235022 |
| 22 | L16 | 32745 | CG33057 | 18.22029    | 0.050703333 | 359.3509302 |
| 22 | L17 | 32609 | CG15528 | 17.60984667 | 0.048109333 | 366.0380522 |
| 22 | L18 | 32753 | CG33188 | 15.39992667 | 0.045517667 | 338.3285611 |
| 22 | L19 | 32617 | CG15896 | 14.8015     | 0.04808     | 307.8514975 |
| 22 | L20 | 32761 | CG3719  | 14.86862    | 0.045107    | 329.6299909 |
| 22 | L21 | 32673 | CG31080 | 15.28174667 | 0.044427667 | 343.9691484 |
| 22 | L22 | 32770 | CG4268  | 6.469794667 | 0.042904667 | 150.794661  |
| 22 | L23 | 32697 | CG31755 | 3.711256    | 0.04709     | 78.81197707 |
| 22 | L24 | 32791 | CG5532  | 15.42659    | 0.046760333 | 329.907614  |
| 22 | M01 | 31388 | CG15566 | 19.71512333 | 0.057380667 | 343.584773  |
| 22 | M02 | 32585 | CG14563 | 12.69948333 | 0.061196    | 207.5214611 |
| 22 | M03 | 31386 | CG13678 | 13.81414    | 0.052054333 | 265.3792512 |
| 22 | M04 | 32577 | CG14260 | 12.63123    | 0.057416667 | 219.9923948 |
| 22 | M05 | 31350 | CG1365  | 14.69000333 | 0.049319667 | 297.8528511 |
| 22 | M06 | 32514 | CG1103  | 13.13297567 | 0.050947333 | 257.7755264 |
| 22 | M07 | 21881 | CG7109  | 5.279857333 | 0.075259667 | 70.15520487 |
| 22 | M08 | 32522 | CG11508 | 14.72294    | 0.056173333 | 262.0983859 |
| 22 | M09 | 21907 | CG7597  | 2.98491     | 0.057252333 | 52.13604103 |
| 22 | M10 | 32530 | CG12112 | 13.56018333 | 0.055202333 | 245.6451116 |
| 22 | M11 | 21910 | CG5671  | 14.31167    | 0.052954    | 270.26608   |
| 22 | M12 | 32538 | CG12404 | 14.62179667 | 0.050900333 | 287.2632792 |
| 22 | M13 | 21880 | CG4551  | 16.33327667 | 0.049334667 | 331.0709846 |
| 22 | M14 | 32546 | CG12929 | 12.76556667 | 0.047178    | 270.5830401 |
| 22 | M15 | 21932 | CG4965  | 15.68218333 | 0.055092667 | 284.6510122 |
| 22 | M16 | 32554 | CG1315  | 15.98059333 | 0.047709333 | 334.9573808 |
| 22 | M17 | 21905 | CG7122  | 14.24205667 | 0.054418333 | 261.714312  |

|    |     |       |                |             |             |             |
|----|-----|-------|----------------|-------------|-------------|-------------|
| 22 | M18 | 32562 | CG13457        | 12.08555333 | 0.047478    | 254.5505989 |
| 22 | M19 | 21939 | CG7062         | 13.09194    | 0.044529333 | 294.0070964 |
| 22 | M20 | 32570 | CG13891        | 13.68804667 | 0.049117333 | 278.6805744 |
| 22 | M21 | 21935 | CG5983         | 16.38016667 | 0.051077    | 320.6955512 |
| 22 | M22 | 32594 | CG14880        | 13.72284333 | 0.048264333 | 284.3267976 |
| 22 | M23 | 32506 | CG10219        | 15.02317667 | 0.046455    | 323.3920281 |
| 22 | M24 | 32601 | CG15267        | 15.73021667 | 0.052041333 | 302.2639056 |
| 22 | N01 | 32649 | CG30038        | 19.28431    | 0.065299667 | 295.3201905 |
| 22 | N02 | 32777 | CG4812         | 12.57448333 | 0.064543    | 194.8233477 |
| 22 | N03 | 32625 | CG17085        | 12.56622333 | 0.062613667 | 200.6945768 |
| 22 | N04 | 32785 | CG5382         | 11.89478667 | 0.064239    | 185.1645677 |
| 22 | N05 | 32634 | CG17784        | 13.32580667 | 0.051613667 | 258.1836852 |
| 22 | N06 | 32706 | CG31975        | 15.4014     | 0.056045333 | 274.8025408 |
| 22 | N07 | 32642 | CG18854        | 14.09326333 | 0.054445    | 258.8532158 |
| 22 | N08 | 32714 | CG32179        | 13.75638333 | 0.058184333 | 236.427618  |
| 22 | N09 | 32658 | CG30129        | 13.36187    | 0.058657333 | 227.7953879 |
| 22 | N10 | 32722 | CG32373        | 13.57175667 | 0.051761    | 262.200434  |
| 22 | N11 | 32666 | CG30383        | 15.07517    | 0.055537333 | 271.442093  |
| 22 | N12 | 32730 | CG32629        | 13.74106    | 0.053067    | 258.9379464 |
| 22 | N13 | 32682 | CG31287        | 14.78425    | 0.057130667 | 258.7795813 |
| 22 | N14 | 32738 | CG32856        | 16.11394    | 0.048698333 | 330.893049  |
| 22 | N15 | 32690 | CG31482        | 16.39022667 | 0.049666333 | 330.0067786 |
| 22 | N16 | 32746 | CG33060        | 14.69094667 | 0.048824333 | 300.8939532 |
| 22 | N17 | 32610 | CG15638        | 15.66123667 | 0.04929     | 317.736593  |
| 22 | N18 | 32754 | CG33192        | 12.86437    | 0.046457333 | 276.907198  |
| 22 | N19 | 32618 | CG15912        | 16.96935333 | 0.049874667 | 340.2399348 |
| 22 | N20 | 32762 | CG3862         | 15.24028    | 0.047349333 | 321.8689457 |
| 22 | N21 | 32699 | CG31812        | 17.52157333 | 0.045967333 | 381.1744572 |
| 22 | N22 | 32771 | CG4289         | 14.42891    | 0.041733333 | 345.740655  |
| 22 | N23 | 32698 | CG31779        | 15.76847333 | 0.046032    | 342.5545997 |
| 22 | N24 | 32792 | CG5543         | 16.85297667 | 0.048222667 | 349.4824702 |
| 22 | O01 | 31400 | CG15864        | 19.53716667 | 0.065263333 | 299.3590071 |
| 22 | O02 | 32586 | CG14670        | 15.91803667 | 0.061392333 | 259.2837868 |
| 22 | O03 | 31399 | CG14746        | 14.22302333 | 0.062210667 | 228.6267628 |
| 22 | O04 | 32579 | CG14313        | 13.69985333 | 0.065644    | 208.6992464 |
| 22 | O05 | 31407 | CG13324        | 11.44117    | 0.063594667 | 179.9076967 |
| 22 | O06 | 32515 | CG11110        | 16.68517667 | 0.06268     | 266.1961817 |
| 22 | O07 | 21893 | CG7115         | 15.0201     | 0.071960667 | 208.7265265 |
| 22 | O08 | 32523 | CG11539        | 16.69713667 | 0.071086667 | 234.8842258 |
| 22 | O09 | 21919 | CG32439        | 12.67975667 | 0.053867    | 235.3900657 |
| 22 | O10 | 32531 | CG12118        | 14.55911333 | 0.050799333 | 286.6004803 |
| 22 | O11 | 21937 | CG6562         | 14.82582333 | 0.058137667 | 255.0123557 |
| 22 | O12 | 32539 | CG12420        | 14.17143    | 0.060209    | 235.3706257 |
| 22 | O13 | 21892 | CG4583         | 15.50037667 | 0.057336667 | 270.3396896 |
| 22 | O14 | 32547 | CG12934        | 13.66078333 | 0.053695333 | 254.4128602 |
| 22 | O15 | 21934 | CG5701         | 16.72863667 | 0.061977333 | 269.9153992 |
| 22 | O16 | 32555 | CG13154        | 20.05518    | 0.056984    | 351.9440545 |
| 22 | O17 | 21917 | CG7134         | 12.84941    | 0.06075     | 211.5129218 |
| 22 | O18 | 32563 | CG13510        | 12.54083667 | 0.054329667 | 230.8285222 |
| 22 | O19 | 21938 | CG13418,CG6800 | 15.53266667 | 0.050055    | 310.3119901 |
| 22 | O20 | 32571 | CG13939        | 17.00820667 | 0.050999333 | 333.4986078 |
| 22 | O21 |       | wts            | 67.63863    | 0.052346667 | 1292.128693 |
| 22 | O22 |       | HFA17794       | 1.575476333 | 0.019616333 | 80.31451681 |
| 22 | O23 |       | hpo            | 45.84225333 | 0.045536    | 1006.725521 |

|    |     |       |                 |             |             |             |
|----|-----|-------|-----------------|-------------|-------------|-------------|
| 22 | O24 |       | Luc             | 2.776143667 | 0.058569667 | 47.39900062 |
| 22 | P01 | 32650 | CG30052         | 15.88108667 | 0.072062333 | 220.3798563 |
| 22 | P02 | 32778 | CG4836          | 15.71406    | 0.068392333 | 229.7634725 |
| 22 | P03 | 32626 | CG17122         | 15.88982667 | 0.067584667 | 235.1099362 |
| 22 | P04 | 32786 | CG5386          | 12.39919667 | 0.063460333 | 195.3849911 |
| 22 | P05 | 32635 | CG17807         | 13.58353333 | 0.064178333 | 211.6529462 |
| 22 | P06 | 32707 | CG32023         | 14.75591333 | 0.064281333 | 229.5520732 |
| 22 | P07 | 32643 | CG2046          | 12.70353    | 0.070032667 | 181.3943493 |
| 22 | P08 | 32715 | CG32224         | 12.07251    | 0.061624    | 195.9059782 |
| 22 | P09 | 32659 | CG30174         | 12.79769667 | 0.060609333 | 211.1505929 |
| 22 | P10 | 32723 | CG32437         | 13.30117    | 0.051855333 | 256.5053418 |
| 22 | P11 | 32667 | CG30404         | 13.66957667 | 0.045246333 | 302.1145728 |
| 22 | P12 | 32731 | CG32692         | 14.13879333 | 0.059228333 | 238.7167178 |
| 22 | P13 | 32683 | CG31301         | 12.72675    | 0.050820333 | 250.4263385 |
| 22 | P14 | 32739 | CG32983         | 13.31999    | 0.054026    | 246.5477733 |
| 22 | P15 | 32691 | CG31484         | 13.88554    | 0.060432667 | 229.7687785 |
| 22 | P16 | 32747 | CG33108         | 13.58511333 | 0.058849667 | 230.8443548 |
| 22 | P17 | 32603 | CG15390         | 13.42052667 | 0.051516667 | 260.5084439 |
| 22 | P18 | 32755 | CG33194         | 12.99365    | 0.049700333 | 261.4398964 |
| 22 | P19 | 32627 | CG17143         | 15.36606667 | 0.055295    | 277.8925159 |
| 22 | P20 | 32763 | CG3949          | 1.573586667 | 0.024784333 | 63.49118395 |
| 22 | P21 |       | wts             | 59.58761333 | 0.044553333 | 1337.444561 |
| 22 | P22 |       | HFA17794        | 1.317566    | 0.020709333 | 63.62184522 |
| 22 | P23 |       | hpo             | 45.34708667 | 0.050397333 | 899.7913911 |
| 22 | P24 |       | Luc             | 2.386       | 0.049725    | 47.98391151 |
| 23 | A01 |       | DIAP1           | 0.485612333 | 0.019834    | 24.48383248 |
| 23 | A02 |       | ex/ft           | 41.84017667 | 0.045064    | 928.4612255 |
| 23 | A03 |       | Luc             | 2.051407333 | 0.052721    | 38.91063017 |
| 23 | A04 |       | hpo             | 40.84001    | 0.043302333 | 943.1364746 |
| 23 | A05 | 32796 | CG5677          | 16.58318667 | 0.046287667 | 358.2636123 |
| 23 | A06 | 17130 | CG12851         | 11.012993   | 0.045617333 | 241.4212361 |
| 23 | A07 | 32804 | CG5964          | 13.25948033 | 0.049989333 | 265.2461925 |
| 23 | A08 | 17210 | CG12797         | 11.98101167 | 0.050499333 | 237.2508878 |
| 23 | A09 | 32812 | CG6258          | 13.42938333 | 0.054005333 | 248.6677242 |
| 23 | A10 | 25588 | CG15765         | 12.42401667 | 0.04673     | 265.8681076 |
| 23 | A11 | 32828 | CG6990          | 11.96496367 | 0.041196333 | 290.4375875 |
| 23 | A12 | 16933 | CG13934         | 12.77307333 | 0.048314333 | 264.3744093 |
| 23 | A13 | 32836 | CG7614          | 15.02830667 | 0.042145333 | 356.5829352 |
| 23 | A14 | 16934 | CG14017         | 10.49894333 | 0.040417333 | 259.7633853 |
| 23 | A15 | 32860 | CG8900          | 1.366948333 | 0.036475333 | 37.47596549 |
| 23 | A16 | 16927 | CG12910,CG18408 | 11.231152   | 0.046019    | 244.0546731 |
| 23 | A17 | 32846 | CG7931          | 15.50098    | 0.037983333 | 408.0995173 |
| 23 | A18 | 16931 | CG13229         | 12.20835333 | 0.037424667 | 326.2114114 |
| 23 | A19 | 32854 | CG8366          | 10.986713   | 0.048779667 | 225.2314079 |
| 23 | A20 | 16926 | CG14262         | 13.59889    | 0.042066    | 323.2750915 |
| 23 | A21 | 17134 | CG11849         | 14.38584    | 0.042917667 | 335.1962284 |
| 23 | A22 | 16731 | CG9001          | 15.49227333 | 0.044956333 | 344.6071373 |
| 23 | A23 | 17127 | CG1311,CG32253  | 5.630281333 | 0.046021667 | 122.3397965 |
| 23 | A24 | 16737 | CG9214          | 10.888282   | 0.043376333 | 251.0189581 |
| 23 | B01 |       | DIAP1           | 0.493875667 | 0.021946667 | 22.50344775 |
| 23 | B02 |       | ex/ft           | 41.48551333 | 0.047368667 | 875.8007403 |
| 23 | B03 |       | Luc             | 2.042899333 | 0.049927667 | 40.91718019 |
| 23 | B04 |       | hpo             | 41.91711    | 0.051772333 | 809.6430526 |
| 23 | B05 | 17312 | CG12924         | 12.43491333 | 0.046749333 | 265.9912441 |

|    |     |       |                 |             |             |             |
|----|-----|-------|-----------------|-------------|-------------|-------------|
| 23 | B06 | 17847 | CG13834         | 9.926813667 | 0.048212    | 205.8992298 |
| 23 | B07 | 17309 | CG13077         | 10.877722   | 0.056054333 | 194.0567545 |
| 23 | B08 | 17843 | CG30021         | 13.95167    | 0.046744333 | 298.4676217 |
| 23 | B09 | 24339 | CG9437          | 12.203512   | 0.042856333 | 284.753992  |
| 23 | B10 | 17845 | CG15862         | 11.89642967 | 0.044214    | 269.0647683 |
| 23 | B11 | 24345 | CG10802         | 14.72353    | 0.048559    | 303.2090859 |
| 23 | B12 | 17851 | CG32392         | 12.96771    | 0.044811667 | 289.3824525 |
| 23 | B13 | 24336 | CG11107         | 12.046615   | 0.040585    | 296.8243193 |
| 23 | B14 | 17850 | CG15617         | 12.04278867 | 0.043728    | 275.4022289 |
| 23 | B15 | 24335 | CG10984         | 15.53910667 | 0.042859    | 362.5634445 |
| 23 | B16 | 17852 | CG11940         | 14.15018    | 0.045970333 | 307.8111246 |
| 23 | B17 | 24349 | CG11241         | 12.18416333 | 0.047045    | 258.989549  |
| 23 | B18 | 17846 | CG12227,CG5357  | 11.738301   | 0.048712667 | 240.9701994 |
| 23 | B19 | 24350 | CG6172          | 13.05479667 | 0.046954    | 278.0337493 |
| 23 | B20 | 17849 | CG10822         | 12.44179933 | 0.043427667 | 286.4947691 |
| 23 | B21 | 24353 | CG9686          | 14.11256    | 0.038809    | 363.6414234 |
| 23 | B22 | 31604 | CG31991         | 11.61857333 | 0.043904667 | 264.6318539 |
| 23 | B23 | 24355 | CG9866          | 15.16709667 | 0.034022667 | 445.7938825 |
| 23 | B24 | 31603 | CG30440         | 12.99712    | 0.040551667 | 320.5076651 |
| 23 | C01 | 32869 | CG9629          | 15.19617333 | 0.047318667 | 321.1454253 |
| 23 | C02 | 17129 | CG12832         | 13.3455     | 0.046261667 | 288.478582  |
| 23 | C03 | 32822 | CG6751          | 17.37407667 | 0.043406667 | 400.2628628 |
| 23 | C04 | 17136 | CG11997         | 17.08681333 | 0.041713    | 409.6280136 |
| 23 | C05 | 32797 | CG5725          | 11.71969133 | 0.044969667 | 260.6132578 |
| 23 | C06 | 17142 | CG12860         | 14.64343667 | 0.047442667 | 308.6554297 |
| 23 | C07 | 32805 | CG5969          | 13.69115    | 0.048794    | 280.5908513 |
| 23 | C08 | 25593 | CG14866         | 12.20904333 | 0.038950333 | 313.4515751 |
| 23 | C09 | 32813 | CG6279          | 18.35909333 | 0.046271    | 396.7732129 |
| 23 | C10 | 25592 | CG31688,CG31687 | 13.17543667 | 0.040048333 | 328.988389  |
| 23 | C11 | 32829 | CG7038          | 8.924269333 | 0.040903667 | 218.1777347 |
| 23 | C12 | 16937 | CG14196         | 15.34780333 | 0.043938    | 349.3059159 |
| 23 | C13 | 32837 | CG7636          | 14.57734    | 0.042354667 | 344.1731726 |
| 23 | C14 | 16946 | CG14022         | 11.56195333 | 0.043021667 | 268.7472204 |
| 23 | C15 | 32861 | CG8908          | 16.75718    | 0.048763333 | 343.6430378 |
| 23 | C16 | 17009 | CG14260,CG5954  | 12.68459333 | 0.045215    | 280.5394965 |
| 23 | C17 | 32847 | CG8014          | 13.04068667 | 0.048643667 | 268.0860133 |
| 23 | C18 | 16943 | CG13232         | 13.1227     | 0.039978    | 328.2480364 |
| 23 | C19 | 32855 | CG8461          | 16.19624    | 0.042029333 | 385.3556246 |
| 23 | C20 | 16940 | CG12983         | 16.11516    | 0.046318333 | 347.9218452 |
| 23 | C21 | 17147 | CG33095         | 14.8443     | 0.040313    | 368.2261305 |
| 23 | C22 | 16743 | CG9004          | 13.49790333 | 0.040598667 | 332.4715918 |
| 23 | C23 | 17139 | CG11604         | 17.37656333 | 0.039108    | 444.3224745 |
| 23 | C24 | 16762 | CG16853,CG9263  | 14.34283667 | 0.03774     | 380.0433669 |
| 23 | D01 | 17318 | CG13040         | 16.94912667 | 0.057414    | 295.2089502 |
| 23 | D02 | 17860 | CG15780         | 15.82298667 | 0.049795333 | 317.7604327 |
| 23 | D03 | 17329 | CG13026         | 15.79314333 | 0.055697    | 283.5546499 |
| 23 | D04 | 17853 | CG31012         | 14.41462    | 0.047599    | 302.8345133 |
| 23 | D05 | 17324 | CG12927         | 15.67455333 | 0.056947667 | 275.2448739 |
| 23 | D06 | 17859 | CG14395         | 14.17983333 | 0.045473    | 311.8297305 |
| 23 | D07 | 17391 | CG12902         | 14.84256333 | 0.044758667 | 331.6131699 |
| 23 | D08 | 17855 | CG14228         | 20.59188    | 0.046979667 | 438.3147319 |
| 23 | D09 | 24351 | CG9472          | 16.57798333 | 0.050408333 | 328.8738634 |
| 23 | D10 | 17857 | CG10718         | 14.86154667 | 0.044803333 | 331.7062719 |
| 23 | D11 | 24357 | CG10840         | 13.13279333 | 0.045408333 | 289.2154891 |

|    |     |       |                |             |             |             |
|----|-----|-------|----------------|-------------|-------------|-------------|
| 23 | D12 | 17863 | CG31045        | 15.10567    | 0.048035    | 314.4721557 |
| 23 | D13 | 24348 | CG11111        | 14.82250667 | 0.039535    | 374.9211247 |
| 23 | D14 | 17844 | CG10642        | 13.04819    | 0.038876667 | 335.6303695 |
| 23 | D15 | 24347 | CG10997        | 12.49800667 | 0.039388333 | 317.3022469 |
| 23 | D16 | 17842 | CG10234        | 14.35577    | 0.04671     | 307.3382573 |
| 23 | D17 | 24361 | CG11266        | 7.062851667 | 0.047148    | 149.8017237 |
| 23 | D18 | 17858 | CG12230        | 25.35446    | 0.057482333 | 441.0826515 |
| 23 | D19 | 24362 | CG6175         | 16.55179333 | 0.045846667 | 361.0250109 |
| 23 | D20 | 17861 | CG10933        | 13.78847    | 0.044001    | 313.3671962 |
| 23 | D21 | 24365 | CG9689         | 14.72078667 | 0.037982667 | 387.5659073 |
| 23 | D22 | 31635 | CG18769        | 16.24093333 | 0.040575    | 400.2694598 |
| 23 | D23 | 24423 | CG31183,CG9632 | 17.07789667 | 0.042665667 | 400.2725845 |
| 23 | D24 | 31657 | CG2666         | 15.67110667 | 0.039592    | 395.8149795 |
| 23 | E01 | 32870 | CG9632         | 24.04990667 | 0.048053333 | 500.4836293 |
| 23 | E02 | 17141 | CG12835        | 17.93619    | 0.042674    | 420.3072128 |
| 23 | E03 | 32823 | CG6770         | 18.64900667 | 0.0441      | 422.8799698 |
| 23 | E04 | 17148 | CG12003        | 19.39180333 | 0.045149333 | 429.5036472 |
| 23 | E05 | 32798 | CG5727         | 17.79727333 | 0.041401667 | 429.8685238 |
| 23 | E06 | 17154 | CG12862        | 16.26930333 | 0.045835667 | 354.9485481 |
| 23 | E07 | 32806 | CG6009         | 19.65301    | 0.039310667 | 499.9408981 |
| 23 | E08 | 25635 | CG15712        | 18.81786667 | 0.04076     | 461.6748446 |
| 23 | E09 | 32814 | CG6294         | 18.62439    | 0.04606     | 404.3506296 |
| 23 | E10 | 16941 | CG13053        | 18.07482    | 0.038641333 | 467.758704  |
| 23 | E11 | 32830 | CG7126         | 19.66816333 | 0.042229667 | 465.7428032 |
| 23 | E12 | 16957 | CG13949        | 17.21082    | 0.047443667 | 362.7632771 |
| 23 | E13 | 32838 | CG7655         | 22.86256667 | 0.04308     | 530.7002476 |
| 23 | E14 | 16958 | CG14023        | 14.78797667 | 0.040636    | 363.9131968 |
| 23 | E15 | 32862 | CG8910         | 19.78980667 | 0.041140333 | 481.0317531 |
| 23 | E16 | 16951 | CG12917        | 17.47992333 | 0.038715    | 451.5026045 |
| 23 | E17 | 32848 | CG8016         | 18.60605333 | 0.044486667 | 418.2388731 |
| 23 | E18 | 16956 | CG13843        | 17.83762    | 0.039007333 | 457.2888859 |
| 23 | E19 | 32856 | CG8481         | 18.71111333 | 0.040165667 | 465.8484444 |
| 23 | E20 | 16950 | CG14292        | 19.96467    | 0.039082    | 510.8405404 |
| 23 | E21 | 17143 | CG11666        | 21.75030333 | 0.039828333 | 546.1012679 |
| 23 | E22 | 16760 | CG9154,CG9159  | 16.54100667 | 0.037064333 | 446.2782729 |
| 23 | E23 | 17145 | CG11767        | 18.98937333 | 0.041219333 | 460.6909379 |
| 23 | E24 | 16759 | CG9077         | 17.02546    | 0.035641667 | 477.6841711 |
| 23 | F01 | 17340 | CG13005        | 21.69619667 | 0.057072667 | 380.1503931 |
| 23 | F02 | 17872 | CG15803        | 16.95627333 | 0.047404    | 357.6971001 |
| 23 | F03 | 17334 | CG13090        | 21.79917667 | 0.046721333 | 466.5786507 |
| 23 | F04 | 17865 | CG12276        | 24.98632    | 0.076223667 | 327.802651  |
| 23 | F05 | 17337 | CG12948        | 19.32780667 | 0.05011     | 385.7075767 |
| 23 | F06 | 17871 | CG14434        | 19.62672333 | 0.044567667 | 440.3803206 |
| 23 | F07 | 17371 | CG12920        | 20.27761    | 0.044168333 | 459.0983736 |
| 23 | F08 | 17867 | CG8760         | 19.09337    | 0.048314333 | 395.1905922 |
| 23 | F09 | 24363 | CG9483         | 16.56526333 | 0.042362333 | 391.0375569 |
| 23 | F10 | 17869 | CG10834        | 15.56423333 | 0.044929333 | 346.415853  |
| 23 | F11 | 24358 | CG6011         | 14.35896667 | 0.056764333 | 252.9575496 |
| 23 | F12 | 17875 | CG10236        | 17.89965333 | 0.042446    | 421.704126  |
| 23 | F13 | 24360 | CG11125        | 12.86826667 | 0.044425    | 289.6627274 |
| 23 | F14 | 17856 | CG11427        | 16.48335333 | 0.036886333 | 446.8688493 |
| 23 | F15 | 24415 | CG10743        | 14.72924    | 0.043354667 | 339.7382827 |
| 23 | F16 | 17854 | CG10255        | 18.02003333 | 0.039478    | 456.4576051 |
| 23 | F17 | 24373 | CG11274        | 13.94531667 | 0.040833    | 341.5207471 |

|    |     |       |                 |             |             |             |
|----|-----|-------|-----------------|-------------|-------------|-------------|
| 23 | F18 | 17878 | CG10536         | 16.59782667 | 0.040593333 | 408.8806044 |
| 23 | F19 | 24391 | CG10722         | 19.82157667 | 0.042463667 | 466.7890981 |
| 23 | F20 | 17921 | CG12393         | 14.17367667 | 0.039822333 | 355.9228071 |
| 23 | F21 | 24366 | CG9804          | 19.50499667 | 0.040353    | 483.3592711 |
| 23 | F22 | 31626 | CG32025         | 18.81433333 | 0.042509333 | 442.5929992 |
| 23 | F23 | 24379 | CG9880          | 18.75501    | 0.042050667 | 446.0098136 |
| 23 | F24 | 31625 | CG31641         | 18.93335667 | 0.033329    | 568.0745497 |
| 23 | G01 | 32871 | CG9650          | 14.06404    | 0.042268    | 332.7349295 |
| 23 | G02 | 17153 | CG12836         | 17.24291    | 0.048982667 | 352.0206468 |
| 23 | G03 | 32824 | CG6781          | 16.68608333 | 0.051072333 | 326.7147249 |
| 23 | G04 | 17160 | CG12011         | 18.82664667 | 0.041677667 | 451.7202658 |
| 23 | G05 | 32799 | CG5780          | 16.51444333 | 0.044211    | 373.536978  |
| 23 | G06 | 17149 | CG12723         | 21.07868    | 0.042067333 | 501.0700306 |
| 23 | G07 | 32807 | CG6164          | 19.24469    | 0.043132667 | 446.1743613 |
| 23 | G08 | 25647 | CG15717,CG32638 | 15.5069     | 0.042500667 | 364.862512  |
| 23 | G09 | 32815 | CG6325          | 17.27339333 | 0.046255    | 373.4384031 |
| 23 | G10 | 16953 | CG13057,CG33060 | 16.00471    | 0.040401    | 396.1463825 |
| 23 | G11 | 32831 | CG7274          | 5.983652667 | 0.033280333 | 179.7954548 |
| 23 | G12 | 16969 | CG14000,CG14001 | 17.22419333 | 0.049236667 | 349.824521  |
| 23 | G13 | 32839 | CG7698          | 31.20232667 | 0.042349    | 736.7901643 |
| 23 | G14 | 16990 | CG30040         | 20.40282    | 0.038584333 | 528.7850855 |
| 23 | G15 | 32863 | CG8974          | 16.96390333 | 0.039030333 | 434.6338318 |
| 23 | G16 | 16963 | CG12918,CG2249  | 20.03058667 | 0.042547333 | 470.7835979 |
| 23 | G17 | 32849 | CG8069          | 20.38317    | 0.039230667 | 519.5723584 |
| 23 | G18 | 16967 | CG13240         | 20.48573333 | 0.036499    | 561.2683453 |
| 23 | G19 | 32857 | CG8617          | 22.00078    | 0.038908667 | 565.4467728 |
| 23 | G20 | 16936 | CG14098         | 17.72953    | 0.035763    | 495.7506361 |
| 23 | G21 | 17193 | CG11815         | 29.27981667 | 0.040906667 | 715.7712679 |
| 23 | G22 | 16811 | CG10068         | 15.29868    | 0.034509667 | 443.3157859 |
| 23 | G23 | 17157 | CG11768,CG8223  | 19.19634333 | 0.023350667 | 822.0897333 |
| 23 | G24 | 16771 | CG9079          | 17.93571    | 0.032292667 | 555.4112389 |
| 23 | H01 | 17352 | CG13008         | 22.06097    | 0.047504333 | 464.3991074 |
| 23 | H02 | 17884 | CG15804         | 18.86372667 | 0.047165667 | 399.9461473 |
| 23 | H03 | 17344 | CG13067         | 16.23934333 | 0.043673333 | 371.8365898 |
| 23 | H04 | 17877 | CG12467         | 15.31986    | 0.050145333 | 305.5091866 |
| 23 | H05 | 17348 | CG12932         | 16.56713667 | 0.049851333 | 332.3308638 |
| 23 | H06 | 17883 | CG14507         | 13.79272333 | 0.045389333 | 303.8758739 |
| 23 | H07 | 17345 | CG13081         | 13.47787667 | 0.054828333 | 245.819558  |
| 23 | H08 | 17879 | CG9068          | 17.43430333 | 0.039556667 | 440.7424791 |
| 23 | H09 | 24387 | CG9601          | 17.73299    | 0.043723    | 405.5757839 |
| 23 | H10 | 17881 | CG10838         | 16.61836667 | 0.041220333 | 403.159444  |
| 23 | H11 | 24370 | CG6066          | 14.33913333 | 0.043311    | 331.0737072 |
| 23 | H12 | 17887 | CG10254         | 13.80942667 | 0.043166667 | 319.9094981 |
| 23 | H13 | 24372 | CG11132         | 24.21706333 | 0.049269    | 491.5273972 |
| 23 | H14 | 17868 | CG11495         | 17.70362667 | 0.046136667 | 383.7214074 |
| 23 | H15 | 24371 | CG11006         | 8.495869667 | 0.039194667 | 216.7608603 |
| 23 | H16 | 17888 | CG9155          | 16.00206333 | 0.040401    | 396.0808726 |
| 23 | H17 | 24384 | CG11276         | 1.981640333 | 0.033611333 | 58.95750441 |
| 23 | H18 | 17890 | CG11759         | 13.70203333 | 0.040299667 | 340.0036394 |
| 23 | H19 | 24403 | CG10739         | 15.02429    | 0.038368667 | 391.5770681 |
| 23 | H20 | 31599 | CG13551         | 16.20233333 | 0.035227667 | 459.932061  |
| 23 | H21 | 24378 | CG9820          | 16.36890667 | 0.037689667 | 434.3075467 |
| 23 | H22 | 31637 | CG32278         | 20.89698333 | 0.035897333 | 582.1319132 |
| 23 | H23 | 24427 | CG10755         | 18.67206333 | 0.033646667 | 554.9454131 |



|    |     |       |                 |             |             |             |
|----|-----|-------|-----------------|-------------|-------------|-------------|
| 23 | H24 | 31636 | CG31710         | 19.77018    | 0.038171667 | 517.9281317 |
| 23 | I01 | 32872 | CG9668          | 22.19796333 | 0.047253667 | 469.7617116 |
| 23 | I02 | 17165 | CG12838         | 16.74181667 | 0.052114333 | 321.251671  |
| 23 | I03 | 32825 | CG6800          | 17.09684333 | 0.050385333 | 339.3218265 |
| 23 | I04 | 17164 | CG12822         | 18.40589333 | 0.052477333 | 350.739875  |
| 23 | I05 | 32800 | CG5915          | 16.49421333 | 0.070744    | 233.1535301 |
| 23 | I06 | 17174 | CG12784         | 13.40233    | 0.045302333 | 295.841936  |
| 23 | I07 | 32808 | CG6167          | 20.00667667 | 0.049769333 | 401.9880381 |
| 23 | I08 | 25630 | CG11170,CG30279 | 15.67001333 | 0.046509    | 336.9243229 |
| 23 | I09 | 32816 | CG6435          | 15.20858333 | 0.048123667 | 316.0312667 |
| 23 | I10 | 16965 | CG13059         | 14.61199333 | 0.046017    | 317.5346792 |
| 23 | I11 | 32832 | CG7354          | 17.79565333 | 0.046394    | 383.5766119 |
| 23 | I12 | 16985 | CG14252         | 13.59788    | 0.044855333 | 303.1496812 |
| 23 | I13 | 32840 | CG7700          | 17.37029333 | 0.049805333 | 348.7637201 |
| 23 | I14 | 17002 | CG13188         | 14.88254667 | 0.045804    | 324.9180566 |
| 23 | I15 | 32864 | CG9091          | 1.823780667 | 0.038627    | 47.21517764 |
| 23 | I16 | 16954 | CG13131         | 16.37349667 | 0.043191667 | 379.0892533 |
| 23 | I17 | 32850 | CG8116          | 10.40265067 | 0.048962667 | 212.4608681 |
| 23 | I18 | 16980 | CG13855         | 14.56502667 | 0.041295333 | 352.7039375 |
| 23 | I19 | 32858 | CG8712          | 15.21379    | 0.042349667 | 359.2422609 |
| 23 | I20 | 16948 | CG14102         | 13.92134    | 0.041996333 | 331.4894157 |
| 23 | I21 | 17182 | CG11927         | 15.64742333 | 0.041011    | 381.5421066 |
| 23 | I22 | 16784 | CG9168          | 14.48447    | 0.038418    | 377.02301   |
| 23 | I23 | 17169 | CG11770         | 15.33343    | 0.037959667 | 403.9400592 |
| 23 | I24 | 16798 | CG9305          | 13.57391667 | 0.033704    | 402.7390419 |
| 23 | J01 | 17364 | CG13010         | 19.32171333 | 0.049880667 | 387.3587629 |
| 23 | J02 | 17896 | CG15844         | 14.01117667 | 0.045964667 | 304.824938  |
| 23 | J03 | 17356 | CG13070         | 13.16029333 | 0.055192667 | 238.4427883 |
| 23 | J04 | 17892 | CG11734         | 14.11743    | 0.048101333 | 293.4935276 |
| 23 | J05 | 17360 | CG11887,CG12934 | 14.23363333 | 0.054076667 | 263.2121063 |
| 23 | J06 | 17895 | CG14622         | 9.811887667 | 0.045829    | 214.0977911 |
| 23 | J07 | 17395 | CG12923         | 15.25314667 | 0.051274    | 297.4830648 |
| 23 | J08 | 17891 | CG9206          | 15.54650333 | 0.049109    | 316.5713685 |
| 23 | J09 | 24386 | CG9511          | 17.48271333 | 0.047254333 | 369.9705847 |
| 23 | J10 | 17893 | CG10839         | 9.671364    | 0.038895333 | 248.6510121 |
| 23 | J11 | 24392 | CG10868         | 12.0067     | 0.040781667 | 294.4141567 |
| 23 | J12 | 17899 | CG10541         | 8.972202667 | 0.044676    | 200.8282448 |
| 23 | J13 | 24411 | CG9624          | 14.01048    | 0.046902333 | 298.7160553 |
| 23 | J14 | 17898 | CG9086          | 2.719794333 | 0.038709333 | 70.26197816 |
| 23 | J15 | 24393 | CG6108          | 16.31141    | 0.043203667 | 377.5468903 |
| 23 | J16 | 17900 | CG9326          | 14.78222    | 0.048393    | 305.461947  |
| 23 | J17 | 24396 | CG11303         | 17.68478    | 0.041538333 | 425.7460177 |
| 23 | J18 | 17902 | CG11807         | 13.28913333 | 0.042648333 | 311.5979522 |
| 23 | J19 | 24397 | CG9383          | 32.06491667 | 0.046256667 | 693.1955754 |
| 23 | J20 | 31610 | CG13739         | 12.76166767 | 0.037544667 | 339.9062716 |
| 23 | J21 | 24400 | CG9750          | 7.456762667 | 0.04922     | 151.498632  |
| 23 | J22 | 31648 | CG32435         | 11.88688    | 0.046647667 | 254.8226063 |
| 23 | J23 | 24402 | CG9928          | 14.84696333 | 0.042503667 | 349.3101772 |
| 23 | J24 | 31679 | CG30438         | 14.87066333 | 0.037424    | 397.3563311 |
| 23 | K02 | 17138 | CG12755         | 15.78633333 | 0.053916667 | 292.7913447 |
| 23 | K03 | 32826 | CG6878          | 13.23581333 | 0.049599333 | 266.854662  |
| 23 | K04 | 17176 | CG12824         | 17.58046333 | 0.048618    | 361.6040013 |
| 23 | K05 | 32801 | CG5919          | 12.65144    | 0.047469333 | 266.5181731 |
| 23 | K06 | 17209 | CG12730         | 15.33115667 | 0.048973    | 313.053247  |

|    |     |       |                |             |             |             |
|----|-----|-------|----------------|-------------|-------------|-------------|
| 23 | K07 | 32809 | CG6171         | 13.71787    | 0.053709    | 255.4110112 |
| 23 | K08 | 25643 | CG31632        | 14.34877333 | 0.049410667 | 290.3982946 |
| 23 | K09 | 32817 | CG6503         | 15.60513333 | 0.043453333 | 359.1239644 |
| 23 | K1  | 32873 | CG9723         | 15.20801333 | 0.047807    | 318.1126892 |
| 23 | K10 | 16977 | CG13088        | 16.20084667 | 0.046474667 | 348.5952203 |
| 23 | K11 | 32833 | CG7496         | 14.06822    | 0.052121333 | 269.9128956 |
| 23 | K12 | 16993 | CG31645        | 13.73105333 | 0.051161    | 268.3890724 |
| 23 | K13 | 32841 | CG7756         | 10.60300533 | 0.041907    | 253.0127505 |
| 23 | K14 | 16994 | CG14034        | 13.31483333 | 0.042063667 | 316.5400068 |
| 23 | K15 | 32865 | CG9171         | 12.54190667 | 0.045610333 | 274.9795003 |
| 23 | K16 | 16987 | CG12929,CG1818 | 14.31023667 | 0.051925333 | 275.5925817 |
| 23 | K17 | 32851 | CG8189         | 10.92256667 | 0.046357    | 235.618497  |
| 23 | K18 | 16992 | CG13870        | 12.51287    | 0.045447667 | 275.3248058 |
| 23 | K19 | 17180 | CG11732        | 14.94994667 | 0.049954667 | 299.2702717 |
| 23 | K20 | 16960 | CG14130        | 14.58021333 | 0.045339    | 321.5821552 |
| 23 | K21 | 17194 | CG11928        | 14.33078    | 0.045913    | 312.1290266 |
| 23 | K22 | 16796 | CG9188         | 12.58841333 | 0.038792    | 324.510552  |
| 23 | K23 | 17205 | CG11816        | 15.38483333 | 0.049943667 | 308.0437293 |
| 23 | K24 | 16797 | CG9247         | 14.43786333 | 0.03814     | 378.5491173 |
| 23 | L01 | 17376 | CG13014        | 18.29257    | 0.054943    | 332.9372259 |
| 23 | L02 | 17908 | CG16757        | 16.09905    | 0.054788667 | 293.8390543 |
| 23 | L03 | 17375 | CG12984        | 15.90429333 | 0.058174    | 273.3917787 |
| 23 | L04 | 17901 | CG32528        | 16.02970333 | 0.052552    | 305.025562  |
| 23 | L05 | 17372 | CG12936        | 16.10037667 | 0.059321667 | 271.4080297 |
| 23 | L06 | 17907 | CG14782        | 10.89033067 | 0.050029333 | 217.6789084 |
| 23 | L07 | 17402 | CG13055        | 12.58528667 | 0.045042667 | 279.4081167 |
| 23 | L08 | 17903 | CG10163        | 15.38474333 | 0.047493333 | 323.9347979 |
| 23 | L09 | 24398 | CG9519         | 16.32256333 | 0.048561667 | 336.1203281 |
| 23 | L10 | 17905 | CG11124        | 14.59848333 | 0.045606667 | 320.0953808 |
| 23 | L11 | 24404 | CG10882        | 14.15072    | 0.047735333 | 296.4412106 |
| 23 | L12 | 17911 | CG10653        | 12.69074333 | 0.046312333 | 274.0251337 |
| 23 | L13 | 24395 | CG11143        | 16.15033333 | 0.048687    | 331.7175701 |
| 23 | L14 | 17910 | CG9279         | 9.476325333 | 0.035751667 | 265.0596802 |
| 23 | L15 | 24394 | CG11061        | 14.26670667 | 0.042290667 | 337.348824  |
| 23 | L16 | 17912 | CG10047        | 15.07327333 | 0.050018    | 301.3569782 |
| 23 | L17 | 24408 | CG11306        | 16.61893667 | 0.048596333 | 341.9792303 |
| 23 | L18 | 17906 | CG12581        | 12.74332667 | 0.044949    | 283.5063442 |
| 23 | L19 | 24409 | CG8312,CG9424  | 13.10582333 | 0.042582333 | 307.776073  |
| 23 | L20 | 31654 | CG16778        | 9.224217667 | 0.043231333 | 213.3687989 |
| 23 | L21 | 24401 | CG9825         | 17.27131333 | 0.045391333 | 380.4980393 |
| 23 | L22 | 31613 | CG1765         | 12.15030667 | 0.043863667 | 277.0016187 |
| 23 | L23 | 24414 | CG9936         | 7.794389333 | 0.038782667 | 200.9761062 |
| 23 | L24 | 31658 | CG31762        | 16.83054333 | 0.043938333 | 383.0491977 |
| 23 | M01 | 32874 | CG9762         | 17.89516667 | 0.055802    | 320.6904173 |
| 23 | M02 | 17195 | CG30131        | 12.13830367 | 0.051549333 | 235.4696537 |
| 23 | M03 | 32827 | CG6972         | 14.72191    | 0.045842    | 321.1445836 |
| 23 | M04 | 17188 | CG12826        | 14.24119667 | 0.050251333 | 283.3993791 |
| 23 | M05 | 32802 | CG5933         | 15.03294667 | 0.052230333 | 287.8202322 |
| 23 | M06 | 17198 | CG33066        | 14.02976667 | 0.051690333 | 271.4195433 |
| 23 | M07 | 32810 | CG6216         | 17.14711667 | 0.047694    | 359.5235599 |
| 23 | M08 | 25661 | CG10790        | 11.87420667 | 0.047267333 | 251.2138052 |
| 23 | M09 | 32818 | CG6520         | 14.57248    | 0.049847333 | 292.3422182 |
| 23 | M10 | 16989 | CG13094        | 12.00206933 | 0.043472333 | 276.0852343 |
| 23 | M11 | 32834 | CG7562         | 13.24092667 | 0.049776333 | 266.0084779 |

|    |     |       |                 |             |             |             |
|----|-----|-------|-----------------|-------------|-------------|-------------|
| 23 | M12 | 17005 | CG14005         | 13.80041    | 0.046867    | 294.459001  |
| 23 | M13 | 32842 | CG7798          | 13.01123    | 0.044922    | 289.640488  |
| 23 | M14 | 17006 | CG14047         | 13.43719333 | 0.046351333 | 289.8987444 |
| 23 | M15 | 32859 | CG8750          | 10.55952    | 0.04716     | 223.9083969 |
| 23 | M16 | 16978 | CG13148         | 11.92221533 | 0.046215667 | 257.9691302 |
| 23 | M17 | 32793 | CG5569          | 15.48180667 | 0.046768333 | 331.0318235 |
| 23 | M18 | 17003 | CG13277         | 10.602771   | 0.050403667 | 210.3571367 |
| 23 | M19 | 17191 | CG11692         | 16.66480667 | 0.042812    | 389.2555047 |
| 23 | M20 | 16972 | CG14141         | 13.75275333 | 0.040801333 | 337.0662723 |
| 23 | M21 | 17206 | CG11929         | 15.45171333 | 0.038779667 | 398.4488435 |
| 23 | M22 | 16803 | CG9038          | 11.55930667 | 0.040646333 | 284.3874396 |
| 23 | M23 | 17199 | CG11634         | 15.4629     | 0.041762667 | 370.256529  |
| 23 | M24 | 16807 | CG9121          | 16.26536    | 0.044819667 | 362.9067597 |
| 23 | N01 | 17388 | CG13021,CG32791 | 16.67556    | 0.054149    | 307.9569336 |
| 23 | N02 | 17885 | CG11217         | 10.834061   | 0.034557    | 313.512776  |
| 23 | N03 | 17387 | CG12994         | 15.91633667 | 0.057761667 | 275.5518943 |
| 23 | N04 | 17913 | CG13521         | 15.52542667 | 0.052757667 | 294.2781144 |
| 23 | N05 | 17385 | CG12960         | 13.28267    | 0.049109667 | 270.4695613 |
| 23 | N06 | 17919 | CG14900         | 14.18975333 | 0.055266    | 256.7537606 |
| 23 | N07 | 17393 | CG13085         | 14.72707667 | 0.047328    | 311.170484  |
| 23 | N08 | 17915 | CG10362         | 14.20366667 | 0.045861333 | 309.7089778 |
| 23 | N09 | 24410 | CG9521          | 12.72857667 | 0.048033667 | 264.9928175 |
| 23 | N10 | 17917 | CG11259         | 14.42444333 | 0.048024667 | 300.3548871 |
| 23 | N11 | 24416 | CG10901         | 15.00862    | 0.051181    | 293.2459311 |
| 23 | N12 | 17923 | CG11525         | 13.13731333 | 0.055621333 | 236.1919887 |
| 23 | N13 | 24407 | CG11181         | 14.10505333 | 0.042682333 | 330.4658446 |
| 23 | N14 | 17922 | CG9313          | 15.49581667 | 0.042538667 | 364.2760312 |
| 23 | N15 | 24406 | CG11089         | 14.62287333 | 0.043478667 | 336.3229477 |
| 23 | N16 | 17924 | CG10083         | 15.85286    | 0.043175333 | 367.1740037 |
| 23 | N17 | 24420 | CG11330         | 16.89184    | 0.039987    | 422.4332908 |
| 23 | N18 | 17918 | CG13466         | 13.77931333 | 0.044461667 | 309.9144581 |
| 23 | N19 | 24364 | CG32982         | 16.52585333 | 0.039703333 | 416.2333977 |
| 23 | N20 | 31665 | CG17193         | 13.52239667 | 0.039223333 | 344.753888  |
| 23 | N21 | 24413 | CG9837          | 16.21229    | 0.042421333 | 382.1730419 |
| 23 | N22 | 31624 | CG18549         | 11.42455033 | 0.041412    | 275.8753582 |
| 23 | N23 | 17841 | CG11168         | 13.60843667 | 0.041155    | 330.6630219 |
| 23 | N24 | 31669 | CG31814         | 17.73699    | 0.044093333 | 402.26013   |
| 23 | O01 | 32875 | CG9863          | 18.86243667 | 0.057396667 | 328.6329636 |
| 23 | O02 | 17201 | CG12844         | 16.43738    | 0.056115    | 292.9231043 |
| 23 | O03 | 32795 | CG5585          | 7.569618    | 0.053020333 | 142.7682084 |
| 23 | O04 | 17208 | CG12715         | 14.58763333 | 0.047318333 | 308.2871332 |
| 23 | O05 | 32803 | CG5934          | 15.04817333 | 0.056466333 | 266.4981493 |
| 23 | O06 | 17197 | CG12729         | 18.26843    | 0.054372    | 335.9896638 |
| 23 | O07 | 32811 | CG6233          | 6.064667667 | 0.057644333 | 105.2083928 |
| 23 | O08 | 25669 | CG15547         | 11.43745    | 0.045411667 | 251.8614893 |
| 23 | O09 | 32819 | CG6533          | 13.96124333 | 0.050024333 | 279.0890433 |
| 23 | O10 | 17001 | CG13097         | 12.047094   | 0.058532667 | 205.8183009 |
| 23 | O11 | 32835 | CG7584          | 13.10240667 | 0.049976    | 262.1739768 |
| 23 | O12 | 17017 | CG14013         | 13.72591333 | 0.053077    | 258.6037895 |
| 23 | O13 | 32843 | CG7885          | 11.26040567 | 0.034801333 | 323.5624784 |
| 23 | O14 | 17018 | CG14064         | 15.08005667 | 0.043626333 | 345.6640867 |
| 23 | O15 | 32867 | CG9424          | 14.1116     | 0.046607333 | 302.7763871 |
| 23 | O16 | 17011 | CG32436         | 12.64146333 | 0.043643    | 289.6561495 |
| 23 | O17 | 32794 | CG5576          | 20.80888333 | 0.048591667 | 428.239753  |

|    |     |       |                 |             |             |             |
|----|-----|-------|-----------------|-------------|-------------|-------------|
| 23 | O18 | 17016 | CG13917         | 12.16086333 | 0.047810667 | 254.3546071 |
| 23 | O19 | 17203 | CG11693         | 17.04778333 | 0.042809333 | 398.2258542 |
| 23 | O20 | 17012 | CG13032         | 14.14620667 | 0.038109667 | 371.197334  |
| 23 | O21 |       | wts             | 64.02753    | 0.043232667 | 1480.998859 |
| 23 | O22 |       | HFA17794        | 1.436652    | 0.017598    | 81.6372315  |
| 23 | O23 |       | hpo             | 45.39871667 | 0.038812667 | 1169.68816  |
| 23 | O24 |       | Luc             | 3.087302    | 0.044173667 | 69.89010044 |
| 23 | P01 | 17390 | CG13054         | 18.18251    | 0.060273333 | 301.66757   |
| 23 | P02 | 17897 | CG12075         | 8.821907    | 0.050387667 | 175.0806811 |
| 23 | P03 | 17401 | CG13038         | 13.90599333 | 0.052557333 | 264.5871176 |
| 23 | P04 | 17925 | CG14902         | 11.84531333 | 0.05356     | 221.1596963 |
| 23 | P05 | 17397 | CG30464,CG30468 | 13.90486333 | 0.047374667 | 293.5084152 |
| 23 | P06 | 17931 | CG31275         | 12.49644333 | 0.050313333 | 248.3723996 |
| 23 | P07 | 24381 | CG6067          | 12.294679   | 0.050584667 | 243.0514978 |
| 23 | P08 | 17927 | CG10617         | 15.18243333 | 0.049124333 | 309.0613613 |
| 23 | P09 | 24422 | CG31886         | 11.26701667 | 0.046043667 | 244.7028545 |
| 23 | P10 | 17916 | CG12042         | 12.94706667 | 0.052736667 | 245.5040769 |
| 23 | P11 | 24428 | CG10955         | 6.882338667 | 0.048454    | 142.0386071 |
| 23 | P12 | 17926 | CG11949         | 14.51268333 | 0.049471333 | 293.3554112 |
| 23 | P13 | 24419 | CG11199         | 12.71268333 | 0.044985333 | 282.5961795 |
| 23 | P14 | 17934 | CG9325          | 13.84183333 | 0.047188667 | 293.329613  |
| 23 | P15 | 24418 | CG11092         | 5.707657333 | 0.037058667 | 154.0168022 |
| 23 | P16 | 17928 | CG14296         | 12.35026333 | 0.043118333 | 286.4271965 |
| 23 | P17 | 24417 | CG6138          | 13.00577333 | 0.039503    | 329.2350792 |
| 23 | P18 | 17930 | CG13809         | 15.32393667 | 0.048922667 | 313.2277472 |
| 23 | P19 | 24376 | CG9589          | 16.69072    | 0.040895667 | 408.1293047 |
| 23 | P20 | 31676 | CG17378         | 13.68511333 | 0.036894667 | 370.9238914 |
| 23 | P21 |       | wts             | 58.55767667 | 0.041816667 | 1400.343005 |
| 23 | P22 |       | HFA17794        | 1.263599    | 0.020023333 | 63.10632595 |
| 23 | P23 |       | hpo             | 40.47493333 | 0.045223333 | 895.0011056 |
| 23 | P24 |       | Luc             | 2.866695333 | 0.043813667 | 65.42924963 |
| 24 | A01 |       | DIAP1           | 0.564618    | 0.019508333 | 28.94240068 |
| 24 | A02 |       | ex/ft           | 40.80258    | 0.043718333 | 933.3059357 |
| 24 | A03 |       | Luc             | 1.853444333 | 0.045718333 | 40.54050527 |
| 24 | A04 |       | hpo             | 36.77370667 | 0.043741333 | 840.708407  |
| 24 | A05 | 31607 | CG6007          | 13.31962667 | 0.040059667 | 332.4946954 |
| 24 | A06 | 25853 | CG13427         | 10.23422167 | 0.041373667 | 247.3607609 |
| 24 | A07 | 25964 | CG14436         | 11.00152533 | 0.049068333 | 224.2082538 |
| 24 | A08 | 25872 | CG30259         | 11.99935333 | 0.044527667 | 269.4808471 |
| 24 | A09 | 31504 | CG7941          | 12.69046333 | 0.045222    | 280.6258753 |
| 24 | A10 | 25876 | CG13585,CG13592 | 12.93612667 | 0.039888    | 324.3112381 |
| 24 | A11 | 31509 | CG6900          | 12.10654667 | 0.045977333 | 263.3155468 |
| 24 | A12 | 28075 | CG14294         | 12.17954333 | 0.047785    | 254.8821457 |
| 24 | A13 | 31506 | CG10344         | 12.36780667 | 0.046335333 | 266.9195574 |
| 24 | A14 | 28078 | CG12955         | 12.59117667 | 0.039701333 | 317.147451  |
| 24 | A15 | 31505 | CG2033          | 1.706431    | 0.037838    | 45.09834029 |
| 24 | A16 | 28079 | CG1660          | 15.54656    | 0.042118    | 369.1191415 |
| 24 | A17 | 31520 | CG9120          | 12.82939    | 0.043144333 | 297.3597923 |
| 24 | A18 | 28082 | CG12384         | 10.839744   | 0.046700667 | 232.111119  |
| 24 | A19 | 31527 | CG18259         | 12.20481    | 0.052036667 | 234.5425021 |
| 24 | A20 | 28076 | CG5680          | 16.55076333 | 0.046028667 | 359.5751199 |
| 24 | A21 | 31524 | CG15058         | 12.24941667 | 0.042859333 | 285.8051144 |
| 24 | A22 | 21466 | CG31481         | 11.54047333 | 0.045556333 | 253.3231384 |
| 24 | A23 | 31526 | CG15646         | 8.845818333 | 0.034261    | 258.1891461 |

|    |     |       |                        |             |             |             |
|----|-----|-------|------------------------|-------------|-------------|-------------|
| 24 | A24 | 21464 | CG10695,CG17717,CG3960 | 14.80465333 | 0.041283333 | 358.6109003 |
| 24 | B01 |       | DIAP1                  | 0.486091333 | 0.022381    | 21.71892826 |
| 24 | B02 |       | ex/ft                  | 39.36893667 | 0.051001333 | 771.9197537 |
| 24 | B03 |       | Luc                    | 2.014098667 | 0.053205    | 37.85543965 |
| 24 | B04 |       | hpo                    | 38.82493667 | 0.046963667 | 826.7015636 |
| 24 | B05 | 21467 | CG17977,CG8715         | 12.68707333 | 0.047804    | 265.3977352 |
| 24 | B06 | 16836 | CG11761,CG12891        | 11.3898     | 0.052486667 | 217.0036835 |
| 24 | B07 | 21469 | CG18234                | 12.56185667 | 0.043961667 | 285.7456875 |
| 24 | B08 | 17946 | CG2264                 | 14.44551    | 0.050858    | 284.0361398 |
| 24 | B09 | 21521 | CG6864                 | 13.63433667 | 0.051597    | 264.2466939 |
| 24 | B10 | 17947 | CG2685                 | 3.836876667 | 0.046179    | 83.08704534 |
| 24 | B11 | 29408 | CG31059                | 12.37124    | 0.048879667 | 253.095834  |
| 24 | B12 | 17945 | CG2194                 | 14.25717333 | 0.055392    | 257.3868669 |
| 24 | B13 | 29403 | CG30479                | 20.52656667 | 0.042866    | 478.854259  |
| 24 | B14 | 17942 | CG2050                 | 14.30059    | 0.045772    | 312.4309622 |
| 24 | B15 | 29397 | CG30442                | 13.24390333 | 0.04375     | 302.7177905 |
| 24 | B16 | 17939 | CG3798                 | 10.090722   | 0.045368    | 222.4193705 |
| 24 | B17 | 29404 | CG30491                | 12.90361667 | 0.048192667 | 267.750626  |
| 24 | B18 | 17937 | CG1857                 | 10.63477433 | 0.046994667 | 226.2974735 |
| 24 | B19 | 29406 | CG31019                | 14.77397333 | 0.042170333 | 350.3404447 |
| 24 | B20 | 17941 | CG1910                 | 9.668806    | 0.043341667 | 223.0833917 |
| 24 | B21 | 29414 | CG30470                | 10.306373   | 0.041483667 | 248.4441186 |
| 24 | B22 | 17955 | CG2097                 | 17.53682667 | 0.047949333 | 365.7366109 |
| 24 | B23 | 29417 | CG31003                | 12.29305667 | 0.038772667 | 317.0547121 |
| 24 | B24 | 17952 | CG3878                 | 12.81036    | 0.038137667 | 335.8978438 |
| 24 | C01 | 31605 | CG3427                 | 12.525108   | 0.048173333 | 260.000858  |
| 24 | C02 | 25783 | CG12655                | 14.59116333 | 0.041878    | 348.4207301 |
| 24 | C03 | 31611 | CG9071                 | 12.60548333 | 0.046876667 | 268.9074166 |
| 24 | C04 | 25775 | CG12667                | 12.09437733 | 0.041006667 | 294.9368558 |
| 24 | C05 | 31631 | CG8276                 | 14.03747    | 0.049825    | 281.7354742 |
| 24 | C06 | 25845 | CG13474                | 14.73096    | 0.050727333 | 290.3949219 |
| 24 | C07 | 25976 | CG14442                | 14.78162667 | 0.047909    | 308.5354874 |
| 24 | C08 | 25882 | CG13698                | 12.95046333 | 0.044724    | 289.564067  |
| 24 | C09 | 31516 | CG8087                 | 12.72655333 | 0.045868333 | 277.4583772 |
| 24 | C10 | 25883 | CG13512                | 13.71569    | 0.040039    | 342.5582557 |
| 24 | C11 | 31521 | CG8893                 | 10.44206867 | 0.045707    | 228.4566624 |
| 24 | C12 | 28087 | CG14363                | 12.81568233 | 0.046124    | 277.8527954 |
| 24 | C13 | 31518 | CG10388                | 13.93392667 | 0.048706    | 286.0823444 |
| 24 | C14 | 28090 | CG14199                | 12.64174333 | 0.038364    | 329.5209919 |
| 24 | C15 | 31517 | CG2071                 | 14.16300667 | 0.045164667 | 313.585989  |
| 24 | C16 | 28091 | CG2852                 | 15.22974333 | 0.044665    | 340.977126  |
| 24 | C17 | 31532 | CG9337                 | 13.27158    | 0.043761667 | 303.2695281 |
| 24 | C18 | 28094 | CG12610                | 12.79615667 | 0.041355667 | 309.4172504 |
| 24 | C19 | 31590 | CG13471                | 12.1316     | 0.045037    | 269.3696294 |
| 24 | C20 | 28081 | CG9338                 | 13.28585667 | 0.042305    | 314.0493244 |
| 24 | C21 | 31536 | CG15295                | 11.93808333 | 0.032732    | 364.7220864 |
| 24 | C22 | 21478 | CG17912                | 6.268195667 | 0.035949    | 174.3635613 |
| 24 | C23 | 31538 | CG12708                | 14.28270667 | 0.042640667 | 334.9550507 |
| 24 | C24 | 21476 | CG31388,CG31441        | 18.76426333 | 0.040216667 | 466.5792789 |
| 24 | D01 | 21475 | CG6985                 | 16.84903667 | 0.059285    | 284.2040426 |
| 24 | D02 | 29423 | CG31088                | 16.04094667 | 0.051755    | 309.940038  |
| 24 | D03 | 21483 | CG18505                | 14.13455667 | 0.054636333 | 258.7025118 |
| 24 | D04 | 29470 | CG31082                | 16.41842333 | 0.053191333 | 308.6672641 |
| 24 | D05 | 21516 | CG18145                | 12.04589567 | 0.053450333 | 225.3661468 |

|    |     |       |                 |             |             |             |
|----|-----|-------|-----------------|-------------|-------------|-------------|
| 24 | D06 | 16846 | CG11563,CG1873  | 12.64747333 | 0.049384    | 256.1046763 |
| 24 | D07 | 21481 | CG18287         | 13.26796667 | 0.045371333 | 292.4306096 |
| 24 | D08 | 17958 | CG2286          | 12.12605667 | 0.047744333 | 253.9789713 |
| 24 | D09 | 21533 | CG6883          | 17.54083667 | 0.047284333 | 370.9650836 |
| 24 | D10 | 17959 | CG2691          | 7.301993    | 0.044432667 | 164.3383922 |
| 24 | D11 | 29420 | CG31060         | 14.91891    | 0.051557667 | 289.3635605 |
| 24 | D12 | 17957 | CG2200          | 14.48404667 | 0.045625667 | 317.4539185 |
| 24 | D13 | 29473 | CG30467         | 15.85457667 | 0.049539333 | 320.0401701 |
| 24 | D14 | 17954 | CG2054          | 16.0402     | 0.040721667 | 393.8984161 |
| 24 | D15 | 29410 | CG3107          | 13.23424333 | 0.044566667 | 296.9538519 |
| 24 | D16 | 17951 | CG3811          | 10.93693833 | 0.041682333 | 262.3878622 |
| 24 | D17 | 29416 | CG30496         | 17.23479    | 0.055476333 | 310.6692343 |
| 24 | D18 | 17949 | CG1863          | 13.27215333 | 0.044177667 | 300.4267616 |
| 24 | D19 | 29418 | CG31020         | 13.72567333 | 0.046701333 | 293.9032433 |
| 24 | D20 | 17953 | CG1960          | 12.93604033 | 0.045568667 | 283.8801589 |
| 24 | D21 | 29426 | CG30472         | 17.76693333 | 0.043225333 | 411.0305685 |
| 24 | D22 | 17967 | CG2098          | 16.05434667 | 0.044071667 | 364.2781833 |
| 24 | D23 | 29429 | CG31007         | 15.74591667 | 0.035259    | 446.5786513 |
| 24 | D24 | 17964 | CG3881          | 12.72567667 | 0.036782    | 345.9756584 |
| 24 | E01 | 31616 | CG3479          | 19.44090667 | 0.046891333 | 414.5948789 |
| 24 | E02 | 25795 | CG12656         | 18.72040333 | 0.041408333 | 452.0926545 |
| 24 | E03 | 31622 | CG9410          | 10.24912233 | 0.049942333 | 205.2191327 |
| 24 | E04 | 25800 | CG12691         | 17.99962667 | 0.05081     | 354.2536246 |
| 24 | E05 | 31629 | CG6174          | 20.98406667 | 0.052179    | 402.155401  |
| 24 | E06 | 25897 | CG13542         | 18.76803333 | 0.040349667 | 465.1347801 |
| 24 | E07 | 25978 | CG14492         | 16.38223667 | 0.04469     | 366.5749981 |
| 24 | E08 | 25877 | CG13607         | 17.4867     | 0.044383667 | 393.9895307 |
| 24 | E09 | 31528 | CG8234          | 18.74816    | 0.046617    | 402.1743141 |
| 24 | E10 | 25900 | CG13594         | 16.12589333 | 0.044837    | 359.6559389 |
| 24 | E11 | 31533 | CG9123          | 16.61356667 | 0.04765     | 348.6582721 |
| 24 | E12 | 28099 | CG14520         | 16.02212333 | 0.045841    | 349.5151357 |
| 24 | E13 | 31530 | CG10539         | 19.66695667 | 0.041236667 | 476.9288659 |
| 24 | E14 | 28102 | CG32532         | 16.30865667 | 0.044397333 | 367.3341492 |
| 24 | E15 | 31529 | CG2885          | 19.24911667 | 0.04194     | 458.9679701 |
| 24 | E16 | 28103 | CG32576,CG3560  | 7.228843667 | 0.039099667 | 184.8824883 |
| 24 | E17 | 31543 | CG33104         | 19.13473667 | 0.041297667 | 463.3369924 |
| 24 | E18 | 28106 | CG12626         | 15.92936667 | 0.039632667 | 401.9251796 |
| 24 | E19 | 31535 | CG14266         | 16.32366333 | 0.037665    | 433.3907695 |
| 24 | E20 | 28108 | CG16849         | 17.30437    | 0.038143333 | 453.666958  |
| 24 | E21 | 31542 | CG12073         | 15.03297667 | 0.036555333 | 411.2389437 |
| 24 | E22 | 21477 | CG17816         | 15.17894333 | 0.041670333 | 364.2625849 |
| 24 | E23 | 31548 | CG11942         | 16.59518    | 0.036798333 | 450.9764029 |
| 24 | E24 | 21548 | CG16901         | 14.99714    | 0.035307667 | 424.7559076 |
| 24 | F01 | 21487 | CG6986          | 15.34165667 | 0.052016    | 294.9411079 |
| 24 | F02 | 29460 | CG31109         | 11.531331   | 0.055024333 | 209.5678457 |
| 24 | F03 | 21495 | CG18506         | 16.91274    | 0.05423     | 311.8705514 |
| 24 | F04 | 16851 | CG10571         | 14.53501667 | 0.047280333 | 307.422043  |
| 24 | F05 | 21506 | CG18437         | 15.78255667 | 0.046585667 | 338.785678  |
| 24 | F06 | 16850 | CG11873         | 16.14938667 | 0.043412    | 372.0028256 |
| 24 | F07 | 21493 | CG18321,CG32845 | 14.6069     | 0.045581    | 320.4602795 |
| 24 | F08 | 17970 | CG2304          | 14.69333333 | 0.045845667 | 320.4955757 |
| 24 | F09 | 21554 | CG18493         | 14.58012333 | 0.042946333 | 339.4963482 |
| 24 | F10 | 17971 | CG2698          | 11.01214333 | 0.044075333 | 249.8482144 |
| 24 | F11 | 29432 | CG31061         | 14.59665667 | 0.044520333 | 327.8649456 |

|    |     |       |                 |             |             |             |
|----|-----|-------|-----------------|-------------|-------------|-------------|
| 24 | F12 | 17969 | CG2221          | 2.73717     | 0.040762333 | 67.14949259 |
| 24 | F13 | 29427 | CG33184         | 15.75615333 | 0.045122667 | 349.1848886 |
| 24 | F14 | 18016 | CG2182          | 14.52084    | 0.039662667 | 366.1085151 |
| 24 | F15 | 29422 | CG31076         | 14.68159333 | 0.038179333 | 384.5429464 |
| 24 | F16 | 17963 | CG3820          | 8.486491667 | 0.043794667 | 193.7791131 |
| 24 | F17 | 29428 | CG30498         | 15.91583667 | 0.038695    | 411.3150709 |
| 24 | F18 | 17986 | CG3772          | 16.02346    | 0.043981667 | 364.321346  |
| 24 | F19 | 29430 | CG31021         | 16.13473667 | 0.039886    | 404.5213024 |
| 24 | F20 | 18028 | CG2186          | 18.2184     | 0.039394667 | 462.4585392 |
| 24 | F21 | 29438 | CG30473         | 17.10346    | 0.042527333 | 402.1756988 |
| 24 | F22 | 17979 | CG2110          | 16.75826333 | 0.041976    | 399.2344038 |
| 24 | F23 | 29441 | CG31008         | 17.20945667 | 0.037508667 | 458.8128077 |
| 24 | F24 | 17976 | CG3925          | 18.12541667 | 0.037174333 | 487.5787954 |
| 24 | G01 | 31627 | CG3567          | 21.72253    | 0.045001667 | 482.7050109 |
| 24 | G02 | 25801 | CG13300         | 14.81725667 | 0.048521667 | 305.3740253 |
| 24 | G03 | 31633 | CG9422          | 11.16619333 | 0.049047333 | 227.6615786 |
| 24 | G04 | 25816 | CG18273         | 15.86593667 | 0.048535    | 326.8968099 |
| 24 | G05 | 31640 | CG6827          | 16.47912667 | 0.048405    | 340.442654  |
| 24 | G06 | 25878 | CG13624         | 17.35267667 | 0.044366667 | 391.1196844 |
| 24 | G07 | 26015 | CG13728         | 19.38937    | 0.046531667 | 416.6919302 |
| 24 | G08 | 25906 | CG13701         | 16.11499367 | 0.046187667 | 348.9025281 |
| 24 | G09 | 31540 | CG8577          | 19.14751333 | 0.049360333 | 387.9129666 |
| 24 | G10 | 25892 | CG31104,CG31300 | 18.88884333 | 0.043867333 | 430.5901886 |
| 24 | G11 | 31544 | CG1304          | 18.07149333 | 0.039564667 | 456.7583871 |
| 24 | G12 | 28111 | CG14534         | 16.06655333 | 0.047856    | 335.7270422 |
| 24 | G13 | 31541 | CG1066          | 16.8835     | 0.040073333 | 421.315089  |
| 24 | G14 | 28114 | CG15369         | 17.13694333 | 0.043432    | 394.5695186 |
| 24 | G15 | 31545 | CG1394          | 13.72259    | 0.043188    | 317.7408076 |
| 24 | G16 | 28080 | CG6610          | 12.62697333 | 0.046126    | 273.7495845 |
| 24 | G17 | 31555 | CG11700         | 0.468147667 | 0.019611    | 23.87168766 |
| 24 | G18 | 28077 | CG6733          | 20.70943333 | 0.042705333 | 484.9378688 |
| 24 | G19 | 31562 | CG32744         | 15.48345667 | 0.040550667 | 381.8298918 |
| 24 | G20 | 28112 | CG11518,CG1569  | 12.925747   | 0.039430333 | 327.8122681 |
| 24 | G21 | 31554 | CG12345         | 22.10797333 | 0.042375667 | 521.7138767 |
| 24 | G22 | 21520 | CG17689         | 19.69183667 | 0.039611667 | 497.1221441 |
| 24 | G23 | 31560 | CG11941         | 17.79619333 | 0.04005     | 444.3493966 |
| 24 | G24 | 21500 | CG17736         | 19.72944    | 0.039632667 | 497.8075325 |
| 24 | H01 | 21499 | CG6987          | 6.082514    | 0.049109    | 123.8574192 |
| 24 | H02 | 29447 | CG31093         | 16.77394667 | 0.046311    | 362.2022126 |
| 24 | H03 | 21507 | CG18507         | 15.16074    | 0.049655333 | 305.3194689 |
| 24 | H04 | 16864 | CG10229,CG12005 | 14.30886667 | 0.042757    | 334.655534  |
| 24 | H05 | 21540 | CG18177         | 13.36624667 | 0.042359667 | 315.5418283 |
| 24 | H06 | 16842 | CG12768         | 17.30608667 | 0.048687    | 355.4560081 |
| 24 | H07 | 21490 | CG17914         | 14.73957667 | 0.049407    | 298.3297239 |
| 24 | H08 | 17982 | CG2368          | 29.22285667 | 0.044481333 | 656.9689907 |
| 24 | H09 | 29401 | CG30457         | 15.99611333 | 0.043484333 | 367.859229  |
| 24 | H10 | 17983 | CG2720          | 13.63127333 | 0.048851667 | 279.0339463 |
| 24 | H11 | 29444 | CG31063         | 16.69309    | 0.045187333 | 369.4196751 |
| 24 | H12 | 17981 | CG2225          | 15.07029667 | 0.042924    | 351.0925512 |
| 24 | H13 | 29439 | CG30482         | 18.03294333 | 0.048015667 | 375.5637396 |
| 24 | H14 | 17978 | CG2062          | 16.99718667 | 0.037340333 | 455.1964364 |
| 24 | H15 | 29433 | CG30445         | 17.80631333 | 0.047563    | 374.3732173 |
| 24 | H16 | 17972 | CG2921          | 17.34955    | 0.041630333 | 416.7526083 |
| 24 | H17 | 29440 | CG30500         | 17.03217333 | 0.040380667 | 421.7902957 |

|    |     |       |                 |             |             |             |
|----|-----|-------|-----------------|-------------|-------------|-------------|
| 24 | H18 | 17973 | CG1868          | 18.35062    | 0.044701    | 410.5192278 |
| 24 | H19 | 29442 | CG31025         | 16.45961667 | 0.035244333 | 467.0145555 |
| 24 | H20 | 17977 | CG1982          | 15.085357   | 0.040519    | 372.3032898 |
| 24 | H21 | 29450 | CG30474         | 14.56375333 | 0.039304    | 370.5412511 |
| 24 | H22 | 17991 | CG2118          | 16.16563667 | 0.033837    | 477.7502931 |
| 24 | H23 | 29453 | CG31010         | 15.78797    | 0.037384333 | 422.3151409 |
| 24 | H24 | 17988 | CG3926          | 16.21558333 | 0.041038333 | 395.1325996 |
| 24 | I01 | 31638 | CG3572          | 17.00578    | 0.053134    | 320.054579  |
| 24 | I02 | 25827 | CG13340         | 14.77456667 | 0.045182333 | 326.9987532 |
| 24 | I03 | 31652 | CG7873          | 18.0637     | 0.052479    | 344.2081595 |
| 24 | I04 | 25805 | CG31173,CG31336 | 14.22317    | 0.046664    | 304.7996314 |
| 24 | I05 | 31651 | CG7085          | 15.20618667 | 0.051618    | 294.5907758 |
| 24 | I06 | 25921 | CG30188         | 12.83123667 | 0.048806667 | 262.8992624 |
| 24 | I07 | 26025 | CG14477,CG33197 | 15.29232333 | 0.049717    | 307.5874114 |
| 24 | I08 | 25893 | CG32365         | 13.47757333 | 0.046937667 | 287.1376933 |
| 24 | I09 | 31551 | CG8628          | 14.78547667 | 0.04626     | 319.6168756 |
| 24 | I10 | 25952 | CG13676         | 16.97132    | 0.045651667 | 371.7568544 |
| 24 | I11 | 31556 | CG9819          | 12.93325333 | 0.032354667 | 399.7337839 |
| 24 | I12 | 28123 | CG14640         | 14.19443    | 0.053351    | 266.057431  |
| 24 | I13 | 31553 | CG33100         | 11.95292333 | 0.042637667 | 280.3371823 |
| 24 | I14 | 28109 | CG32576,CG3606  | 11.90025333 | 0.047519667 | 250.4279632 |
| 24 | I15 | 31552 | CG10781         | 14.99985    | 0.044943333 | 333.7502781 |
| 24 | I16 | 28127 | CG4094,CG4095   | 14.63268667 | 0.064714    | 226.1131543 |
| 24 | I17 | 31593 | CG13402         | 14.69723    | 0.041385    | 355.1342274 |
| 24 | I18 | 28089 | CG31746         | 15.94474667 | 0.046533333 | 342.652149  |
| 24 | I19 | 31574 | CG18412         | 12.64846667 | 0.052732    | 239.8632077 |
| 24 | I20 | 28131 | CG16836         | 13.87609667 | 0.043140333 | 321.6501959 |
| 24 | I21 | 31571 | CG15368         | 15.22405667 | 0.041238    | 369.1754369 |
| 24 | I22 | 21501 | CG17826         | 15.15096333 | 0.040768333 | 371.6355832 |
| 24 | I23 | 31573 | CG11642         | 13.89691333 | 0.039035667 | 356.0055334 |
| 24 | I24 | 21512 | CG17737         | 16.14502333 | 0.045756333 | 352.8478389 |
| 24 | J01 | 21511 | CG7021          | 12.10265367 | 0.049088    | 246.550148  |
| 24 | J02 | 29459 | CG4861          | 14.37173667 | 0.055788667 | 257.6103271 |
| 24 | J03 | 21519 | CG18528         | 13.06629667 | 0.053975333 | 242.0790361 |
| 24 | J04 | 16875 | CG10585,CG9936  | 12.41264333 | 0.056608    | 219.2736598 |
| 24 | J05 | 21515 | CG18063         | 11.35861833 | 0.048672667 | 233.3674958 |
| 24 | J06 | 16880 | CG11362,CG4444  | 12.49399667 | 0.042076333 | 296.9364409 |
| 24 | J07 | 21502 | CG17919         | 14.07712667 | 0.046353333 | 303.6917877 |
| 24 | J08 | 17994 | CG2469          | 11.47393667 | 0.046553    | 246.4704029 |
| 24 | J09 | 29413 | CG30459         | 14.43910333 | 0.047414667 | 304.5282051 |
| 24 | J10 | 17995 | CG2736          | 13.71282333 | 0.042054667 | 326.0713833 |
| 24 | J11 | 29456 | CG31065         | 14.37279667 | 0.044534667 | 322.7327775 |
| 24 | J12 | 17993 | CG2238          | 9.615714667 | 0.045117    | 213.1284143 |
| 24 | J13 | 29451 | CG30484         | 15.61001    | 0.048893    | 319.2688115 |
| 24 | J14 | 17990 | CG2063          | 8.213520333 | 0.055697    | 147.4679127 |
| 24 | J15 | 29445 | CG30446         | 12.905175   | 0.044853333 | 287.7194188 |
| 24 | J16 | 17984 | CG2922          | 11.44751333 | 0.071817333 | 159.3976385 |
| 24 | J17 | 29407 | CG31041         | 14.02048333 | 0.042688667 | 328.4357285 |
| 24 | J18 | 17968 | CG2162          | 13.79295333 | 0.039382333 | 350.2319991 |
| 24 | J19 | 29479 | CG31053         | 13.30065333 | 0.043865333 | 303.2155993 |
| 24 | J20 | 18032 | CG3691          | 13.06302667 | 0.042422667 | 307.9256372 |
| 24 | J21 | 29462 | CG30475         | 12.75668667 | 0.043242667 | 295.0023125 |
| 24 | J22 | 18003 | CG2139          | 19.96691333 | 0.041803333 | 477.6392632 |
| 24 | J23 | 29465 | CG31015         | 12.47220667 | 0.038422333 | 324.6082574 |



|    |     |       |                 |             |             |             |
|----|-----|-------|-----------------|-------------|-------------|-------------|
| 24 | J24 | 18000 | CG3957          | 12.47031    | 0.033796    | 368.98775   |
| 24 | K02 | 25839 | CG13343         | 13.20390333 | 0.052166    | 253.1132027 |
| 24 | K03 | 31656 | CG9220          | 13.62620067 | 0.049710333 | 274.1120357 |
| 24 | K04 | 25823 | CG12682         | 14.04050333 | 0.050967    | 275.4822401 |
| 24 | K05 | 31683 | CG5942          | 11.41745667 | 0.052477333 | 217.5692998 |
| 24 | K06 | 25959 | CG13587,CG3541  | 9.802446    | 0.053401    | 183.562967  |
| 24 | K07 | 26042 | CG32223         | 13.34752667 | 0.048443    | 275.5305548 |
| 24 | K08 | 25932 | CG30189,CG30191 | 15.51295333 | 0.053605667 | 289.3901764 |
| 24 | K09 | 31563 | CG8640          | 12.70273667 | 0.050765667 | 250.2229854 |
| 24 | K1  | 31650 | CG5507          | 13.47782667 | 0.048364333 | 278.6728512 |
| 24 | K10 | 28086 | CG11350         | 12.15982333 | 0.052791333 | 230.3374923 |
| 24 | K11 | 31568 | CG9807          | 12.46931333 | 0.041002667 | 304.109814  |
| 24 | K12 | 28135 | CG14770         | 12.52243333 | 0.053057667 | 236.0155303 |
| 24 | K13 | 31565 | CG10776         | 11.822163   | 0.047932    | 246.6444755 |
| 24 | K14 | 28121 | CG7630          | 9.990416    | 0.044733333 | 223.3326975 |
| 24 | K15 | 31569 | CG12462         | 8.598552    | 0.035306667 | 243.5390483 |
| 24 | K16 | 28122 | CG12699         | 14.29369333 | 0.050293667 | 284.2046381 |
| 24 | K17 | 31579 | CG4052          | 14.51269333 | 0.041955333 | 345.9081881 |
| 24 | K18 | 28139 | CG7424          | 1.165225333 | 0.037323667 | 31.21947647 |
| 24 | K19 | 31586 | CG5744          | 12.43529867 | 0.045412667 | 273.8288583 |
| 24 | K20 | 21472 | CG17666         | 15.48240667 | 0.045184667 | 342.6473582 |
| 24 | K21 | 31583 | CG17438         | 14.03455    | 0.042347    | 331.41781   |
| 24 | K22 | 21513 | CG17828         | 13.73758    | 0.045027    | 305.0964977 |
| 24 | K23 | 31585 | CG1527          | 1.628661333 | 0.040040333 | 40.67551885 |
| 24 | K24 | 21524 | CG17744         | 15.2132     | 0.041368333 | 367.7498892 |
| 24 | L01 | 21523 | CG7029          | 16.92591333 | 0.051536    | 328.4289299 |
| 24 | L02 | 29434 | CG31077         | 17.21321    | 0.052562    | 327.4839237 |
| 24 | L03 | 21485 | CG18729         | 16.30902    | 0.056615    | 288.0688863 |
| 24 | L04 | 16881 | CG11473         | 13.04886333 | 0.046449333 | 280.9268163 |
| 24 | L05 | 21527 | CG18066,CG30150 | 13.65031333 | 0.057152    | 238.8422686 |
| 24 | L06 | 16889 | CG10536,CG12744 | 13.14963    | 0.051442667 | 255.617192  |
| 24 | L07 | 21514 | CG32352         | 14.26483    | 0.047365333 | 301.1660427 |
| 24 | L08 | 18006 | CG2522          | 13.12698333 | 0.053429333 | 245.6886978 |
| 24 | L09 | 29461 | CG30466         | 17.20729333 | 0.049007    | 351.1190918 |
| 24 | L10 | 18007 | CG2747          | 13.036374   | 0.045380333 | 287.2692429 |
| 24 | L11 | 29468 | CG31066         | 24.70778333 | 0.04766     | 518.4176109 |
| 24 | L12 | 18005 | CG2244          | 12.50292433 | 0.045262667 | 276.2303959 |
| 24 | L13 | 29463 | CG30487         | 15.48149    | 0.047680667 | 324.6911397 |
| 24 | L14 | 18002 | CG2076          | 11.78227333 | 0.045996333 | 256.1567951 |
| 24 | L15 | 29457 | CG30447         | 13.82119667 | 0.048532    | 284.7852276 |
| 24 | L16 | 17996 | CG2926          | 17.01055    | 0.056872333 | 299.1006172 |
| 24 | L17 | 29464 | CG3065          | 12.53542667 | 0.054989333 | 227.9610591 |
| 24 | L18 | 17980 | CG2163          | 2.228198    | 0.030485333 | 73.09081963 |
| 24 | L19 | 29466 | CG31031         | 15.75200333 | 0.047330667 | 332.8075525 |
| 24 | L20 | 18001 | CG2009          | 8.085700667 | 0.038681667 | 209.0318583 |
| 24 | L21 | 29474 | CG30476         | 14.15538667 | 0.045820667 | 308.9301771 |
| 24 | L22 | 18015 | CG2145          | 18.14906    | 0.04293     | 422.7593757 |
| 24 | L23 | 29477 | CG31016         | 13.94189    | 0.041812    | 333.4423132 |
| 24 | L24 | 17962 | CG3731          | 5.188188    | 0.044501667 | 116.5841279 |
| 24 | M01 | 31670 | CG32464         | 11.92004    | 0.048689    | 244.8199799 |
| 24 | M02 | 25851 | CG13350         | 12.70137333 | 0.050242667 | 252.8005414 |
| 24 | M03 | 31681 | CG32490         | 10.30157067 | 0.045930667 | 224.2852415 |
| 24 | M04 | 25848 | CG12710         | 10.373894   | 0.050431667 | 205.7019862 |
| 24 | M05 | 26040 | CG13772         | 10.68410733 | 0.045278333 | 235.9651194 |

|    |     |       |                 |             |             |             |
|----|-----|-------|-----------------|-------------|-------------|-------------|
| 24 | M06 | 25914 | CG13636         | 11.74391333 | 0.051019    | 230.1870545 |
| 24 | M07 | 26044 | CG14383,CG31342 | 12.0439     | 0.044576    | 270.1879935 |
| 24 | M08 | 25942 | CG13708         | 11.91041667 | 0.050538333 | 235.6709428 |
| 24 | M09 | 31575 | CG8821          | 8.897497667 | 0.047267667 | 188.2364477 |
| 24 | M10 | 28098 | CG11517         | 10.69372533 | 0.04586     | 233.1819741 |
| 24 | M11 | 31580 | CG9906          | 12.51086667 | 0.049382667 | 253.3453033 |
| 24 | M12 | 28146 | CG14778,CG32808 | 13.46710333 | 0.048519333 | 277.5615906 |
| 24 | M13 | 31572 | CG12700         | 11.11997633 | 0.046422333 | 239.5393668 |
| 24 | M14 | 28149 | CG17760         | 10.53745333 | 0.043359    | 243.0280526 |
| 24 | M15 | 31576 | CG10279         | 6.112899667 | 0.036898667 | 165.6672237 |
| 24 | M16 | 28134 | CG13561         | 13.72265333 | 0.045625    | 300.770484  |
| 24 | M17 | 31591 | CG4575          | 13.27154333 | 0.044999333 | 294.9275545 |
| 24 | M18 | 28148 | CG10679         | 10.32231467 | 0.039437    | 261.7418837 |
| 24 | M19 | 31598 | CG1924          | 14.22050333 | 0.035963333 | 395.4167207 |
| 24 | M20 | 21484 | CG17667         | 12.55887    | 0.040040667 | 313.6528696 |
| 24 | M21 | 31595 | CG17440         | 11.84181333 | 0.045301    | 261.4029124 |
| 24 | M22 | 21525 | CG17836         | 15.88835333 | 0.036844333 | 431.2292257 |
| 24 | M23 | 31597 | CG18157         | 14.00939333 | 0.037752333 | 371.0868202 |
| 24 | M24 | 21536 | CG17758         | 13.91152333 | 0.042241333 | 329.3343802 |
| 24 | N01 | 21538 | CG17931         | 14.06026333 | 0.057321    | 245.289917  |
| 24 | N02 | 29446 | CG31078         | 15.85741667 | 0.055854667 | 283.9049557 |
| 24 | N03 | 21534 | CG31239,CG6972  | 13.23855333 | 0.056601333 | 233.8911922 |
| 24 | N04 | 16899 | CG10596         | 10.801908   | 0.046157667 | 234.0219682 |
| 24 | N05 | 21539 | CG18094         | 13.21426333 | 0.050604    | 261.1308065 |
| 24 | N06 | 16921 | CG11866         | 14.23140333 | 0.051044    | 278.8065852 |
| 24 | N07 | 21526 | CG17930         | 8.436777333 | 0.044305    | 190.4249483 |
| 24 | N08 | 18018 | CG2658          | 14.31131667 | 0.048628    | 294.3019797 |
| 24 | N09 | 29437 | CG33142         | 13.44869    | 0.049487333 | 271.7602484 |
| 24 | N10 | 18019 | CG2791          | 13.85780667 | 0.042941    | 322.7173719 |
| 24 | N11 | 29480 | CG31067         | 13.38126667 | 0.043576    | 307.0788201 |
| 24 | N12 | 18008 | CG2930          | 15.18438    | 0.049123    | 309.1093785 |
| 24 | N13 | 29475 | CG30488         | 16.90741    | 0.046811333 | 361.1819787 |
| 24 | N14 | 18014 | CG2082          | 14.65139667 | 0.042125    | 347.807636  |
| 24 | N15 | 29469 | CG30448         | 12.30419    | 0.043909667 | 280.2159737 |
| 24 | N16 | 18011 | CG3861          | 11.57357    | 0.045628667 | 253.6469033 |
| 24 | N17 | 29431 | CG31047         | 14.61384667 | 0.045262667 | 322.8675583 |
| 24 | N18 | 17992 | CG31029         | 12.91011667 | 0.042352667 | 304.8241748 |
| 24 | N19 | 29485 | CG30469         | 12.19215667 | 0.041535    | 293.5393443 |
| 24 | N20 | 17998 | CG3782          | 10.483778   | 0.040812    | 256.8797903 |
| 24 | N21 | 29486 | CG30477         | 13.02211    | 0.039685333 | 328.1340714 |
| 24 | N22 | 18027 | CG2152          | 13.09993    | 0.041336667 | 316.9082332 |
| 24 | N23 | 29491 | CG31055         | 14.24432667 | 0.036837667 | 386.6783093 |
| 24 | N24 | 17974 | CG3735          | 10.252017   | 0.040631    | 252.3200758 |
| 24 | O01 | 31671 | CG3762          | 10.552212   | 0.041878333 | 251.9730648 |
| 24 | O02 | 25849 | CG13307,CG32023 | 18.08526    | 0.050220333 | 360.1182788 |
| 24 | O03 | 31677 | CG3026          | 12.34537    | 0.047666333 | 258.9955874 |
| 24 | O04 | 25864 | CG13397         | 12.75974667 | 0.044299667 | 288.0325661 |
| 24 | O05 | 26038 | CG14512,CG14516 | 12.45304    | 0.045017333 | 276.6276693 |
| 24 | O06 | 25961 | CG13622         | 13.15978333 | 0.053433667 | 246.2826183 |
| 24 | O07 | 31581 | CG13373         | 12.65224333 | 0.047834333 | 264.5012996 |
| 24 | O08 | 25954 | CG32239         | 13.04677667 | 0.06805     | 191.7233897 |
| 24 | O09 | 31587 | CG9111          | 11.55278333 | 0.051330667 | 225.0659125 |
| 24 | O10 | 28154 | CG17117         | 13.19467    | 0.050688333 | 260.3098017 |
| 24 | O11 | 31578 | CG13211         | 11.11309333 | 0.050096667 | 221.8329896 |

|    |     |       |                 |             |             |             |
|----|-----|-------|-----------------|-------------|-------------|-------------|
| 24 | O12 | 28157 | CG31751         | 13.16329    | 0.051638333 | 254.9131459 |
| 24 | O13 | 31589 | CG11030         | 14.25667333 | 0.053327667 | 267.34103   |
| 24 | O14 | 28144 | CG9048          | 13.51960333 | 0.055519    | 243.5130916 |
| 24 | O15 | 31588 | CG10293         | 12.04578333 | 0.040518    | 297.294618  |
| 24 | O16 | 28128 | CG7355          | 13.93837333 | 0.044001333 | 316.771613  |
| 24 | O17 | 31596 | CG32584         | 15.96460667 | 0.052260333 | 305.482297  |
| 24 | O18 | 28163 | CG14117         | 14.62105333 | 0.047173667 | 309.9409982 |
| 24 | O19 | 31594 | CG15036         | 11.19207033 | 0.053564    | 208.9476203 |
| 24 | O20 | 21544 | CG17715         | 12.90797333 | 0.042710333 | 302.2213204 |
| 24 | O21 |       | wts             | 58.78738667 | 0.040898333 | 1437.402991 |
| 24 | O22 |       | HFA17794        | 1.333893    | 0.021405333 | 62.31591815 |
| 24 | O23 |       | hpo             | 43.24538333 | 0.041671333 | 1037.772969 |
| 24 | O24 |       | Luc             | 4.137397667 | 0.044857667 | 92.23390279 |
| 24 | P01 | 21547 | CG3052,CG7038   | 12.28842967 | 0.061727333 | 199.0759847 |
| 24 | P02 | 29458 | CG31079         | 16.80999    | 0.053361333 | 315.021926  |
| 24 | P03 | 21546 | CG6981          | 12.00297667 | 0.048573    | 247.112113  |
| 24 | P04 | 16911 | CG31752,CG33120 | 11.23573333 | 0.044147    | 254.50729   |
| 24 | P05 | 21551 | CG18104         | 12.29933    | 0.051147333 | 240.4686461 |
| 24 | P06 | 16910 | CG31660         | 13.39024    | 0.052362    | 255.7243803 |
| 24 | P07 | 21553 | CG18397         | 12.70537    | 0.051253667 | 247.8919232 |
| 24 | P08 | 18030 | CG2674          | 7.918211333 | 0.046066333 | 171.8871627 |
| 24 | P09 | 29467 | CG31050         | 14.21674333 | 0.050074333 | 283.912783  |
| 24 | P10 | 18031 | CG2818          | 11.01430667 | 0.045844667 | 240.2527375 |
| 24 | P11 | 29492 | CG31068         | 14.27290667 | 0.047519    | 300.3621008 |
| 24 | P12 | 18029 | CG2258          | 13.51109333 | 0.047426667 | 284.8838909 |
| 24 | P13 | 29487 | CG30490         | 12.35711333 | 0.049545667 | 249.4085591 |
| 24 | P14 | 18020 | CG3690          | 11.91806333 | 0.045092    | 264.305494  |
| 24 | P15 | 29481 | CG30450         | 13.59522333 | 0.044820333 | 303.3271357 |
| 24 | P16 | 18023 | CG3868          | 13.91211333 | 0.046955333 | 296.2839862 |
| 24 | P17 | 29443 | CG31049         | 14.53734    | 0.049806333 | 291.8773382 |
| 24 | P18 | 18004 | CG2173          | 9.297602    | 0.051459333 | 180.678633  |
| 24 | P19 | 29490 | CG31035         | 13.35847333 | 0.042735    | 312.5885886 |
| 24 | P20 | 18025 | CG2041          | 13.87106333 | 0.048191667 | 287.8311603 |
| 24 | P21 |       | wts             | 51.83701    | 0.041916    | 1236.6879   |
| 24 | P22 |       | HFA17794        | 1.111557333 | 0.019043667 | 58.36887154 |
| 24 | P23 |       | hpo             | 39.68254    | 0.041985333 | 945.1524342 |
| 24 | P24 |       | Luc             | 2.931857    | 0.042460667 | 69.04877455 |
| 25 | A01 |       | DIAP1           | 1.126095    | 0.033797667 | 33.31872023 |
| 25 | A02 |       | ex/ft           | 93.35378    | 0.132658667 | 703.7141436 |
| 25 | A03 |       | Luc             | 4.40148     | 0.133866333 | 32.87966354 |
| 25 | A04 |       | hpo             | 82.41681333 | 0.123954667 | 664.8948002 |
| 25 | A05 | 30453 | CG6311          | 34.47232333 | 0.136311333 | 252.8940367 |
| 25 | A06 | 28555 | CG13892         | 28.18225    | 0.119302333 | 236.225472  |
| 25 | A07 | 30464 | CG6897          | 24.00671667 | 0.218781667 | 109.7291059 |
| 25 | A08 | 28546 | CG14065         | 36.73838667 | 0.127529667 | 288.0771794 |
| 25 | A09 | 30456 | CG7094          | 29.369      | 0.108461667 | 270.7776941 |
| 25 | A10 | 31415 | CG2360          | 26.24905    | 0.110882667 | 236.7281631 |
| 25 | A11 | 30455 | CG7020          | 34.51637333 | 0.121054667 | 285.1304645 |
| 25 | A12 | 31409 | CG4216          | 25.52706667 | 0.121398333 | 210.2752646 |
| 25 | A13 | 30463 | CG6821          | 25.79512667 | 0.121039    | 213.1141753 |
| 25 | A14 | 31418 | CG32165         | 24.2406     | 0.106971    | 226.609081  |
| 25 | A15 | 30546 | CG6805          | 26.74611    | 0.123505    | 216.5589247 |
| 25 | A16 | 31419 | CG32283         | 30.29386    | 0.105631667 | 286.7876742 |
| 25 | A17 | 28550 | CG1344          | 31.45572667 | 0.108076    | 291.0519141 |

|    |     |       |         |             |             |             |
|----|-----|-------|---------|-------------|-------------|-------------|
| 25 | A18 | 31416 | CG31274 | 29.39107667 | 0.105165667 | 279.4740679 |
| 25 | A19 | 28544 | CG13248 | 29.95096    | 0.096504667 | 310.3576338 |
| 25 | A20 | 31417 | CG31958 | 30.26922667 | 0.09891     | 306.0279716 |
| 25 | A21 | NA    | NA      | 30.11745667 | 0.104111333 | 289.2812502 |
| 25 | A22 | 31413 | CG18281 | 27.92068333 | 0.099915667 | 279.4424965 |
| 25 | A23 | 28549 | CG13386 | 31.58340667 | 0.092888667 | 340.0135646 |
| 25 | A24 | 31424 | CG18030 | 30.09044    | 0.095841    | 313.962083  |
| 25 | B01 |       | DIAP1   | 0.944013    | 0.035619    | 26.5030742  |
| 25 | B02 |       | ex/ft   | 80.29185    | 0.146067333 | 549.6906678 |
| 25 | B03 |       | Luc     | 6.181968667 | 0.138623333 | 44.59544088 |
| 25 | B04 |       | hpo     | 80.26964333 | 0.150304    | 534.048617  |
| 25 | B05 | 30938 | CG4015  | 32.59304    | 0.148206333 | 219.9166477 |
| 25 | B06 | 21757 | CG15349 | 33.60845333 | 0.139554    | 240.8275888 |
| 25 | B07 | 30942 | CG5488  | 35.18493667 | 0.119412    | 294.6515984 |
| 25 | B08 | 21758 | CG15361 | 29.83895667 | 0.120754333 | 247.104645  |
| 25 | B09 | 30935 | CG7135  | 34.68319667 | 0.128213    | 270.5123245 |
| 25 | B10 | 21754 | CG15258 | 28.92959    | 0.123926667 | 233.4412018 |
| 25 | B11 | 30941 | CG4955  | 33.1417     | 0.147600667 | 224.5362487 |
| 25 | B12 | 21835 | CG16964 | 32.88455333 | 0.118769667 | 276.8766997 |
| 25 | B13 | 30945 | CG3621  | 49.24239667 | 0.118071333 | 417.0563275 |
| 25 | B14 | 20031 | CG5115  | 27.81178    | 0.116614    | 238.4943489 |
| 25 | B15 | 31019 | CG3972  | 31.47005    | 0.127259667 | 247.2900552 |
| 25 | B16 | 20032 | CG5190  | 31.63996333 | 0.109735    | 288.330645  |
| 25 | B17 | 23193 | CG1644  | 29.72701333 | 0.100878667 | 294.6808707 |
| 25 | B18 | 20027 | CG6705  | 28.60171    | 0.111048    | 257.561685  |
| 25 | B19 | 23192 | CG1584  | 29.57950333 | 0.107904    | 274.1279594 |
| 25 | B20 | 20030 | CG5038  | 27.70214667 | 0.100661    | 275.2023789 |
| 25 | B21 | 23195 | CG1736  | 29.0697     | 0.095409    | 304.6850926 |
| 25 | B22 | 20035 | CG6284  | 26.80426    | 0.109545333 | 244.6864616 |
| 25 | B23 | 23185 | CG1358  | 28.69422667 | 0.095118    | 301.6697856 |
| 25 | B24 | 20036 | CG6481  | 37.83319    | 0.109679333 | 344.9436539 |
| 25 | C01 | 18012 | CG3964  | 41.96962333 | 0.141219333 | 297.1946004 |
| 25 | C02 | 28566 | CG13847 | 39.39246333 | 0.118942333 | 331.1895961 |
| 25 | C03 | 30470 | CG6463  | 41.07237333 | 0.113340333 | 362.3809118 |
| 25 | C04 | 28545 | CG13960 | 39.79046667 | 0.11078     | 359.18457   |
| 25 | C05 | 30465 | CG6331  | 33.89998667 | 0.116033667 | 292.1564718 |
| 25 | C06 | 28567 | CG13894 | 41.96271    | 0.121247667 | 346.0908664 |
| 25 | C07 | 30476 | CG6902  | 39.79449333 | 0.118026    | 337.1671779 |
| 25 | C08 | 28631 | CG14244 | 39.81260333 | 0.113391    | 351.1090239 |
| 25 | C09 | 30468 | CG7100  | 44.82423    | 0.112184333 | 399.5587322 |
| 25 | C10 | 31427 | CG30002 | 38.11188667 | 0.124285333 | 306.6483039 |
| 25 | C11 | 30467 | CG7026  | 36.24487333 | 0.140352333 | 258.2420432 |
| 25 | C12 | 31421 | CG4478  | 35.08279    | 0.116399    | 301.4011289 |
| 25 | C13 | 30475 | CG6829  | 40.22139333 | 0.12446     | 323.1672291 |
| 25 | C14 | 31426 | CG18730 | 31.79514667 | 0.098407    | 323.0984246 |
| 25 | C15 | 28551 | CG13489 | 35.56723667 | 0.100631333 | 353.440976  |
| 25 | C16 | 31431 | CG32416 | 30.07205667 | 0.103687667 | 290.0253968 |
| 25 | C17 | 28562 | CG13441 | 39.12389    | 0.113913    | 343.4541273 |
| 25 | C18 | 31428 | CG31362 | 35.32257333 | 0.093823667 | 376.4782873 |
| 25 | C19 | 28556 | CG13260 | 29.57643667 | 0.100264333 | 294.984624  |
| 25 | C20 | 31429 | CG31960 | 34.70278667 | 0.086983667 | 398.9575054 |
| 25 | C21 | 28564 | CG1361  | 37.89431667 | 0.105526333 | 359.098203  |
| 25 | C22 | 31425 | CG18290 | 178.6985    | 0.103406667 | 1728.113919 |
| 25 | C23 | 28561 | CG13387 | 65.3596     | 0.128545    | 508.4569606 |

|    |     |       |                 |             |             |             |
|----|-----|-------|-----------------|-------------|-------------|-------------|
| 25 | C24 | 31436 | CG18179         | 38.38133333 | 0.095419667 | 402.2371349 |
| 25 | D01 | 31411 | CG6478          | 43.45787667 | 0.163533    | 265.7437744 |
| 25 | D02 | 21751 | CG15439         | 36.16378333 | 0.131236333 | 275.5622808 |
| 25 | D03 | 31458 | CG6444          | 39.47241667 | 0.142103333 | 277.7726302 |
| 25 | D04 | 21779 | CG15308         | 33.80827333 | 0.121724    | 277.7453364 |
| 25 | D05 | 30950 | CG12236         | 30.22043667 | 0.137068333 | 220.4771586 |
| 25 | D06 | 21769 | CG15350         | 32.43988333 | 0.125433    | 258.6231959 |
| 25 | D07 | 30954 | CG9570          | 35.33924667 | 0.148143333 | 238.5476678 |
| 25 | D08 | 21770 | CG31663         | 37.40599333 | 0.128980667 | 290.012405  |
| 25 | D09 | 30947 | CG7282          | 10.25433833 | 0.096964    | 105.7540771 |
| 25 | D10 | 21843 | CG15393         | 32.51539333 | 0.132311    | 245.7497361 |
| 25 | D11 | 30951 | CG17778         | 33.13973667 | 0.118742    | 279.0902685 |
| 25 | D12 | 20033 | CG31418,CG31419 | 30.79239333 | 0.116099    | 265.2253106 |
| 25 | D13 | 30957 | CG3630          | 36.84596    | 0.128531333 | 286.6690872 |
| 25 | D14 | 20043 | CG5123          | 32.64898667 | 0.122531    | 266.4549107 |
| 25 | D15 | 31026 | CG6961          | 29.37999333 | 0.119974333 | 244.8856561 |
| 25 | D16 | 20040 | CG7498          | 34.84169667 | 0.116689333 | 298.5851035 |
| 25 | D17 | 23250 | CG1500          | 34.16534    | 0.097328333 | 351.0317996 |
| 25 | D18 | 20039 | CG6709,CG8107   | 20.79204333 | 0.109728667 | 189.4859745 |
| 25 | D19 | 23204 | CG1597          | 35.96250667 | 0.114814333 | 313.2231458 |
| 25 | D20 | 20042 | CG5060          | 35.74311667 | 0.1038      | 344.346018  |
| 25 | D21 | 23268 | CG2995          | 30.56978667 | 0.107154    | 285.2883389 |
| 25 | D22 | 20047 | CG6291          | 35.83840333 | 0.102916    | 348.2296565 |
| 25 | D23 | 23215 | CG1529          | 30.27887333 | 0.103163667 | 293.5032683 |
| 25 | D24 | 20025 | CG4115          | 36.39441    | 0.104561667 | 348.066468  |
| 25 | E01 | 18024 | CG3967          | 47.59082    | 0.144274    | 329.8641474 |
| 25 | E02 | 28607 | CG14240         | 38.11998667 | 0.1394      | 273.4575801 |
| 25 | E03 | 30482 | CG6465          | 44.47169    | 0.130288667 | 341.331991  |
| 25 | E04 | 28557 | CG13994         | 53.38183667 | 0.130237667 | 409.8801678 |
| 25 | E05 | 30477 | CG6337          | 44.84356667 | 0.128854667 | 348.0166286 |
| 25 | E06 | 28579 | CG13898         | 39.18062    | 0.121277667 | 323.0654174 |
| 25 | E07 | 30488 | CG6907          | 38.21100667 | 0.115848333 | 329.8364816 |
| 25 | E08 | 28547 | CG14165         | 45.67571333 | 0.120112    | 380.2760202 |
| 25 | E09 | 30480 | CG7104          | 41.54693667 | 0.124536    | 333.613868  |
| 25 | E10 | 31439 | CG30059         | 39.23045667 | 0.116884333 | 335.6348584 |
| 25 | E11 | 30479 | CG7031          | 42.93170667 | 0.128662667 | 333.6764874 |
| 25 | E12 | 31433 | CG4479          | 49.91442333 | 0.104072667 | 479.6112652 |
| 25 | E13 | 30532 | CG6625          | 5.580237667 | 0.370447333 | 15.0635115  |
| 25 | E14 | 31442 | CG32189         | 43.74046333 | 0.112757333 | 387.9167948 |
| 25 | E15 | 28554 | CG13845         | 39.44544667 | 0.101252667 | 389.574398  |
| 25 | E16 | 31443 | CG32453         | 35.13340333 | 0.095434667 | 368.1408922 |
| 25 | E17 | 28574 | CG13454         | 44.46330667 | 0.114244667 | 389.1937187 |
| 25 | E18 | 31440 | CG31447         | 41.35768667 | 0.090274    | 458.135085  |
| 25 | E19 | 28577 | CG13722         | 39.81995667 | 0.099202667 | 401.4000632 |
| 25 | E20 | 31434 | CG6289          | 37.60162    | 0.102022    | 368.5638392 |
| 25 | E21 | 28576 | CG13628         | 20.93361333 | 0.086848    | 241.037368  |
| 25 | E22 | 31462 | CG18789         | 30.40831333 | 0.074419333 | 408.6077095 |
| 25 | E23 | 28601 | CG13794         | 43.55219333 | 0.085912333 | 506.9376147 |
| 25 | E24 | 31448 | CG18211         | 34.05001333 | 0.084323333 | 403.8029806 |
| 25 | F01 | 31494 | CG6467          | 45.01186333 | 0.160899667 | 279.7511286 |
| 25 | F02 | 21763 | CG15441         | 45.10356333 | 0.132204333 | 341.1655442 |
| 25 | F03 | 31470 | CG6447          | 37.5563     | 0.140755333 | 266.8197297 |
| 25 | F04 | 21791 | CG15311         | 41.01441333 | 0.125369333 | 327.1486913 |
| 25 | F05 | 30962 | CG4027          | 84.23651333 | 0.131520667 | 640.4811918 |

|    |     |       |                 |             |             |             |
|----|-----|-------|-----------------|-------------|-------------|-------------|
| 25 | F06 | 21785 | CG15404,CG31698 | 43.81339333 | 0.125511333 | 349.0791801 |
| 25 | F07 | 30966 | CG9581          | 42.17367    | 0.137014333 | 307.8048039 |
| 25 | F08 | 21822 | CG15432,CG15437 | 36.11325    | 0.135826333 | 265.8781189 |
| 25 | F09 | 30959 | CG7326          | 48.35376    | 0.119115333 | 405.9406849 |
| 25 | F10 | 21778 | CG15263         | 37.50178333 | 0.112128333 | 334.4541225 |
| 25 | F11 | 30965 | CG32767         | 37.40551333 | 0.108355333 | 345.211557  |
| 25 | F12 | 20045 | CG5357          | 34.53796    | 0.103147333 | 334.8410364 |
| 25 | F13 | 30969 | CG3704          | 45.76841333 | 0.113965333 | 401.5994337 |
| 25 | F14 | 20055 | CG5139          | 29.81818667 | 0.097208333 | 306.7451693 |
| 25 | F15 | 23194 | CG1676          | 24.854      | 0.145169333 | 171.2069583 |
| 25 | F16 | 20056 | CG5199          | 40.26052667 | 0.109975667 | 366.0857705 |
| 25 | F17 | 23217 | CG1650          | 40.33238667 | 0.126495    | 318.8456988 |
| 25 | F18 | 20051 | CG6712          | 29.74548333 | 0.120909667 | 246.0141042 |
| 25 | F19 | 23216 | CG1620          | 40.21884    | 0.105613333 | 380.8121449 |
| 25 | F20 | 20054 | CG5062          | 41.55247667 | 0.093082333 | 446.4056194 |
| 25 | F21 | 23219 | CG1785          | 29.77028667 | 0.121939    | 244.1408136 |
| 25 | F22 | 20059 | CG6294,CG6299   | 34.84268    | 0.091186667 | 382.1027928 |
| 25 | F23 | 23274 | CG1504          | 42.51779    | 0.091543333 | 464.4553399 |
| 25 | F24 | 20060 | CG31084,CG6503  | 34.26056    | 0.085906333 | 398.8129707 |
| 25 | G01 | 30495 | CG6530          | 47.04572    | 0.120123    | 391.6462293 |
| 25 | G02 | 28619 | CG14243         | 39.57339333 | 0.122515    | 323.0085568 |
| 25 | G03 | 30494 | CG6483          | 36.84546667 | 0.116695333 | 315.7407037 |
| 25 | G04 | 28569 | CG13998         | 45.72400667 | 0.126194    | 362.331067  |
| 25 | G05 | 30489 | CG6348          | 36.08998667 | 0.126391    | 285.5423778 |
| 25 | G06 | 28591 | CG13902         | 40.79024667 | 0.142645667 | 285.9550354 |
| 25 | G07 | 30500 | CG6908          | 39.35633    | 0.116414667 | 338.0702031 |
| 25 | G08 | 28559 | CG14179         | 40.98037    | 0.12057     | 339.8886124 |
| 25 | G09 | 30492 | CG7105          | 42.62016667 | 0.122546667 | 347.7872375 |
| 25 | G10 | 31451 | CG30119         | 37.34102    | 0.106719333 | 349.8992997 |
| 25 | G11 | 30521 | CG6666          | 34.82269    | 0.102712667 | 339.0301423 |
| 25 | G12 | 31445 | CG4692          | 37.27169333 | 0.109850333 | 339.2952229 |
| 25 | G13 | 30499 | CG6854          | 43.57622667 | 0.118145    | 368.8368248 |
| 25 | G14 | 31454 | CG32212         | 39.93881    | 0.101749667 | 392.5203031 |
| 25 | G15 | 28584 | CG13310         | 36.50483    | 0.102197333 | 357.1994377 |
| 25 | G16 | 31455 | CG3584          | 35.75291333 | 0.091061    | 392.6259687 |
| 25 | G17 | 28586 | CG13459         | 33.54887333 | 0.107580667 | 311.8485354 |
| 25 | G18 | 31452 | CG31702         | 33.67764333 | 0.092186333 | 365.3214323 |
| 25 | G19 | 28580 | CG13279         | 33.96518333 | 0.100467333 | 338.0719106 |
| 25 | G20 | 31453 | CG32009         | 34.23168667 | 0.094938    | 360.5688625 |
| 25 | G21 | 28588 | CG13631         | 29.06273333 | 0.092019333 | 315.8329047 |
| 25 | G22 | 31449 | CG18372         | 42.65039    | 0.097202667 | 438.7779828 |
| 25 | G23 | 28613 | CG13796         | 38.38470333 | 0.098398667 | 390.0937343 |
| 25 | G24 | 31460 | CG18217         | 35.47765667 | 0.080454    | 440.9682137 |
| 25 | H01 | 31435 | CG7045          | 51.43231667 | 0.135863    | 378.5601427 |
| 25 | H02 | 21775 | CG16886         | 58.07374    | 0.144089667 | 403.0388948 |
| 25 | H03 | 31482 | CG6460          | 46.14190667 | 0.141273    | 326.6151824 |
| 25 | H04 | 21803 | CG15313         | 40.53159    | 0.142890333 | 283.6552274 |
| 25 | H05 | 30979 | CG6103          | 34.69927    | 0.074118667 | 468.1583137 |
| 25 | H06 | 21793 | CG15352         | 40.30218333 | 0.142182333 | 283.4542266 |
| 25 | H07 | 30972 | CG7803          | 30.61190667 | 0.136491667 | 224.2767446 |
| 25 | H08 | 21794 | CG15371         | 39.10845    | 0.120841667 | 323.6338184 |
| 25 | H09 | 30976 | CG4746          | 42.56025333 | 0.125774667 | 338.3849424 |
| 25 | H10 | 21790 | CG15267,CG3975  | 38.98694667 | 0.101939667 | 382.4511884 |
| 25 | H11 | 30975 | CG4313          | 34.18854667 | 0.122598667 | 278.8655668 |

|    |     |       |                 |             |             |             |
|----|-----|-------|-----------------|-------------|-------------|-------------|
| 25 | H12 | 20057 | CG5378          | 3.225254333 | 0.078125667 | 41.28290319 |
| 25 | H13 | 30980 | CG3708          | 39.28757667 | 0.105378333 | 372.8240467 |
| 25 | H14 | 20067 | CG32428         | 40.74134667 | 0.128059333 | 318.1442977 |
| 25 | H15 | 23208 | CG2974          | 32.77526667 | 0.105471333 | 310.7504725 |
| 25 | H16 | 20068 | CG5225          | 39.79620333 | 0.104269    | 381.6686008 |
| 25 | H17 | 23229 | CG1655          | 35.15811333 | 0.100289    | 350.5679918 |
| 25 | H18 | 20063 | CG6736          | 38.58552333 | 0.088460667 | 436.1884755 |
| 25 | H19 | 23189 | CG1406          | 40.48129    | 0.146666333 | 276.0094227 |
| 25 | H20 | 20041 | CG4297          | 35.50248    | 0.083109    | 427.1797278 |
| 25 | H21 | 23231 | CG1829          | 34.73144333 | 0.097317667 | 356.8873415 |
| 25 | H22 | 20046 | CG5509          | 38.73509    | 0.085458667 | 453.2611087 |
| 25 | H23 | 23249 | CG1454          | 22.72488333 | 0.087420333 | 259.9496303 |
| 25 | H24 | 20113 | CG5011          | 48.93260333 | 0.084904    | 576.3285986 |
| 25 | I01 | 30507 | CG6536          | 39.75688    | 0.164376    | 241.8654791 |
| 25 | I02 | 28602 | CG40301,CG40307 | 34.65119333 | 0.149013    | 232.538056  |
| 25 | I03 | 30473 | CG6641          | 40.69014333 | 0.143003667 | 284.539161  |
| 25 | I04 | 28629 | CG14036         | 35.34675333 | 0.122786333 | 287.8720487 |
| 25 | I05 | 30498 | CG6743          | 14.96019667 | 0.129017    | 115.9552359 |
| 25 | I06 | 28603 | CG13914         | 29.02012    | 0.161289    | 179.9262194 |
| 25 | I07 | 30469 | CG6418          | 34.50245    | 0.125191667 | 275.5970179 |
| 25 | I08 | 28571 | CG1418          | 31.47785667 | 0.122495333 | 256.9718846 |
| 25 | I09 | 30517 | CG6452          | 39.18761333 | 0.142694    | 274.6269173 |
| 25 | I10 | 31463 | CG30176         | 29.92586333 | 0.140310333 | 213.2833885 |
| 25 | I11 | 30503 | CG7046          | 27.62212333 | 0.116276667 | 237.5551701 |
| 25 | I12 | 31457 | CG4960          | 33.98624667 | 0.115319333 | 294.7142139 |
| 25 | I13 | 30454 | CG6948          | 33.09994333 | 0.096467    | 343.1219312 |
| 25 | I14 | 31466 | CG32214         | 31.36555333 | 0.11561     | 271.3048468 |
| 25 | I15 | 28596 | CG13331         | 29.26392333 | 0.105111333 | 278.40883   |
| 25 | I16 | 31467 | CG3678          | 33.37711    | 0.115046    | 290.1196913 |
| 25 | I17 | 28598 | CG13460         | 34.65550333 | 0.118484    | 292.4909974 |
| 25 | I18 | 31464 | CG31703         | 28.09497    | 0.098824    | 284.2929855 |
| 25 | I19 | 28592 | CG13281         | 12.23819667 | 0.134747667 | 90.82306929 |
| 25 | I20 | 31480 | CG40282         | 24.01544333 | 0.113118    | 212.3043489 |
| 25 | I21 | 28632 | CG13345         | 17.85849667 | 0.098007    | 182.2165424 |
| 25 | I22 | 31461 | CG18396         | 30.65587333 | 0.089182333 | 343.7437908 |
| 25 | I23 | 28597 | CG13407         | 28.70168    | 0.094951667 | 302.2767373 |
| 25 | I24 | 31472 | CG18240         | 32.6249     | 0.102340333 | 318.7882914 |
| 25 | J01 | 31447 | CG7170          | 29.55439    | 0.150260667 | 196.6874676 |
| 25 | J02 | 21780 | CG15335         | 32.93006667 | 0.159317    | 206.695247  |
| 25 | J03 | 30949 | CG3848          | 25.22571    | 0.150038667 | 168.1280603 |
| 25 | J04 | 21815 | CG15317         | 29.14402    | 0.136852    | 212.9601321 |
| 25 | J05 | 30968 | CG6789          | 30.17107667 | 0.129086333 | 233.7278927 |
| 25 | J06 | 21805 | CG15353         | 31.33535333 | 0.136647333 | 229.3155129 |
| 25 | J07 | 30983 | CG7990          | 32.16816667 | 0.130410667 | 246.6682173 |
| 25 | J08 | 21806 | CG15374         | 32.00133667 | 0.123155    | 259.8460206 |
| 25 | J09 | 30996 | CG3954          | 19.98799333 | 0.130548    | 153.1083841 |
| 25 | J10 | 21834 | CG15436         | 27.87569333 | 0.135604333 | 205.5663905 |
| 25 | J11 | 30988 | CG5172          | 29.8752     | 0.112602667 | 265.3152086 |
| 25 | J12 | 20062 | CG6602          | 33.36576667 | 0.123128667 | 270.9829284 |
| 25 | J13 | 30992 | CG3713          | 33.13734667 | 0.109897667 | 301.5291195 |
| 25 | J14 | 20079 | CG5146          | 24.21235    | 0.103698333 | 233.4883235 |
| 25 | J15 | 23218 | CG1703          | 23.24984    | 0.140401    | 165.5959715 |
| 25 | J16 | 20080 | CG31716         | 36.39684333 | 0.144557    | 251.7819499 |
| 25 | J17 | 23241 | CG1662          | 27.96061    | 0.104701333 | 267.0511359 |

|    |     |       |                |             |             |             |
|----|-----|-------|----------------|-------------|-------------|-------------|
| 25 | J18 | 20098 | CG6657         | 29.59499    | 0.103309    | 286.4705882 |
| 25 | J19 | 23201 | CG1409         | 30.43824333 | 0.09869     | 308.4227716 |
| 25 | J20 | 20078 | CG5083         | 36.66808667 | 0.097858667 | 374.7045399 |
| 25 | J21 | 23243 | CG2939         | 30.25581333 | 0.101211667 | 298.9360252 |
| 25 | J22 | 20058 | CG5540         | 30.44571    | 0.100503333 | 302.9323406 |
| 25 | J23 | 23251 | CG1553         | 29.68778667 | 0.094114    | 315.4449568 |
| 25 | J24 | 20117 | CG5478         | 24.17235    | 0.085981333 | 281.1348587 |
| 25 | K02 | 28614 | CG13876        | 35.61911667 | 0.141759    | 251.265293  |
| 25 | K03 | 30518 | CG6513         | 34.28587667 | 0.156519333 | 219.0520234 |
| 25 | K04 | 28593 | CG14029        | 31.26160333 | 0.172058667 | 181.6915354 |
| 25 | K05 | 30513 | CG6362         | 30.93191333 | 0.150189    | 205.9532545 |
| 25 | K06 | 28615 | CG13942        | 28.67665    | 0.125084667 | 229.257916  |
| 25 | K07 | 30481 | CG6437         | 32.41894333 | 0.118908333 | 272.6381106 |
| 25 | K08 | 28606 | CG14106        | 17.98261    | 0.204567667 | 87.90543634 |
| 25 | K09 | 30516 | CG7118         | 32.46785    | 0.136503667 | 237.8533177 |
| 25 | K1  | 30519 | CG32952        | 30.20818    | 0.11475     | 263.2521133 |
| 25 | K10 | 31475 | CG30321        | 31.96703    | 0.107564333 | 297.1898678 |
| 25 | K11 | 30520 | CG6612         | 29.32529667 | 0.128004667 | 229.0955278 |
| 25 | K12 | 31469 | CG5106         | 31.04201667 | 0.115752667 | 268.1753912 |
| 25 | K13 | 30466 | CG6956         | 27.844      | 0.112290667 | 247.9636182 |
| 25 | K14 | 31478 | CG32231        | 24.99855    | 0.110475667 | 226.2810513 |
| 25 | K15 | 28599 | CG13544        | 21.27539333 | 0.10758     | 197.7634628 |
| 25 | K16 | 31479 | CG3875         | 24.81273333 | 0.104535333 | 237.3621678 |
| 25 | K17 | 28610 | CG13461        | 30.47213667 | 0.114044333 | 267.1955351 |
| 25 | K18 | 31432 | CG17210        | 30.88422667 | 0.098122667 | 314.7511958 |
| 25 | K19 | 28604 | CG13283        | 28.21968667 | 0.096325333 | 292.9622529 |
| 25 | K20 | 31477 | CG32021        | 28.37170333 | 0.097782667 | 290.1506402 |
| 25 | K21 | 28612 | CG13674        | 27.72687667 | 0.093317667 | 297.1235529 |
| 25 | K22 | 31498 | CG2341         | 26.56948333 | 0.097359    | 272.9021799 |
| 25 | K23 | 28637 | CG13841        | 26.57947    | 0.098183333 | 270.7126464 |
| 25 | K24 | 31446 | CG6434         | 13.14184    | 0.102911333 | 127.7006096 |
| 25 | L01 | 31459 | CG7271         | 39.89712333 | 0.170481    | 234.0268026 |
| 25 | L02 | 21783 | CG15382,CG3166 | 29.81616333 | 0.141780667 | 210.2978074 |
| 25 | L03 | 30961 | CG3847         | 71.26055667 | 0.151386333 | 470.71988   |
| 25 | L04 | 21827 | CG15325        | 35.48781    | 0.138381667 | 256.448783  |
| 25 | L05 | 30993 | CG7095         | 30.89722    | 0.125552333 | 246.0903687 |
| 25 | L06 | 21817 | CG15356        | 31.37233333 | 0.140750667 | 222.8929644 |
| 25 | L07 | 30995 | CG7952         | 28.35989    | 0.121403667 | 233.5999462 |
| 25 | L08 | 21818 | CG15375        | 29.50871667 | 0.13965     | 211.3048096 |
| 25 | L09 | 30999 | CG4865         | 31.76910333 | 0.129532667 | 245.259394  |
| 25 | L10 | 21814 | CG15276        | 28.08022667 | 0.121856333 | 230.4371541 |
| 25 | L11 | 31002 | CG6867         | 29.19838333 | 0.108026333 | 270.2894973 |
| 25 | L12 | 20074 | CG6608         | 27.80068    | 0.114843667 | 242.074124  |
| 25 | L13 | 30986 | CG4325         | 25.61286333 | 0.104651667 | 244.7439601 |
| 25 | L14 | 20091 | CG5150         | 27.49073    | 0.107514    | 255.6944212 |
| 25 | L15 | 23232 | CG2983         | 28.69789667 | 0.102591333 | 279.7302241 |
| 25 | L16 | 20092 | CG5265         | 29.83916333 | 0.105149    | 283.7798109 |
| 25 | L17 | 23253 | CG1668         | 34.06676333 | 0.102027333 | 333.8983998 |
| 25 | L18 | 20110 | CG6679         | 28.08909333 | 0.094739    | 296.4892318 |
| 25 | L19 | 23252 | CG1632         | 29.21820667 | 0.104999667 | 278.2695183 |
| 25 | L20 | 20090 | CG5089         | 28.06308333 | 0.089643    | 313.0538172 |
| 25 | L21 | 23266 | CG1722         | 29.83580333 | 0.090182333 | 330.8386713 |
| 25 | L22 | 20100 | CG7692         | 29.16730667 | 0.103856    | 280.8437323 |
| 25 | L23 | 23273 | CG31022        | 30.45726333 | 0.096129    | 316.8374095 |



|    |     |       |         |             |             |             |
|----|-----|-------|---------|-------------|-------------|-------------|
| 25 | L24 | 20073 | CG4185  | 52.32722667 | 0.109949333 | 475.9212728 |
| 25 | M01 | 30526 | CG7006  | 41.30281667 | 0.218233    | 189.2601791 |
| 25 | M02 | 28626 | CG13879 | 43.91890667 | 0.146173    | 300.4584066 |
| 25 | M03 | 30530 | CG33130 | 37.13529333 | 0.133253667 | 278.681212  |
| 25 | M04 | 28605 | CG14032 | 38.11345333 | 0.128137667 | 297.4414497 |
| 25 | M05 | 30525 | CG6372  | 32.21301    | 0.121363333 | 265.4262133 |
| 25 | M06 | 28627 | CG13952 | 40.47628    | 0.114353    | 353.9590566 |
| 25 | M07 | 30536 | CG6936  | 38.70059667 | 0.124791333 | 310.1224711 |
| 25 | M08 | 28595 | CG14237 | 34.53697333 | 0.111119333 | 310.8097601 |
| 25 | M09 | 30541 | CG6456  | 35.53218    | 0.122575667 | 289.8795574 |
| 25 | M10 | 31487 | CG30458 | 31.02886333 | 0.108033667 | 287.2147571 |
| 25 | M11 | 30527 | CG7069  | 34.87558333 | 0.113368667 | 307.6298272 |
| 25 | M12 | 31481 | CG5207  | 44.36481667 | 0.118343667 | 374.8812076 |
| 25 | M13 | 30535 | CG6876  | 31.20536    | 0.161779333 | 192.88842   |
| 25 | M14 | 31490 | CG32268 | 33.19715333 | 0.10829     | 306.5578847 |
| 25 | M15 | 28611 | CG13560 | 34.35651667 | 0.10791     | 318.3812127 |
| 25 | M16 | 31450 | CG18787 | 21.59474667 | 0.087955333 | 245.5194682 |
| 25 | M17 | 28553 | CG13717 | 37.98261333 | 0.109267667 | 347.6107296 |
| 25 | M18 | 31488 | CG31864 | 38.06203    | 0.100014667 | 380.5644839 |
| 25 | M19 | 28616 | CG13291 | 34.17133667 | 0.099956667 | 341.8615067 |
| 25 | M20 | 31489 | CG32074 | 34.67906333 | 0.095956    | 361.4058874 |
| 25 | M21 | 28635 | CG13590 | 31.38119667 | 0.098043    | 320.0758511 |
| 25 | M22 | 31485 | CG18444 | 33.40777667 | 0.100585667 | 332.1325769 |
| 25 | M23 | 28621 | CG13415 | 35.71672667 | 0.098838667 | 361.3639062 |
| 25 | M24 | 31496 | CG18278 | 41.11027    | 0.098443333 | 417.6033928 |
| 25 | N01 | 31471 | CG7287  | 38.64847333 | 0.157848    | 244.8461389 |
| 25 | N02 | 21795 | CG15383 | 40.90531    | 0.148688    | 275.1083477 |
| 25 | N03 | 30973 | CG3895  | 44.82265333 | 0.199564333 | 224.6025258 |
| 25 | N04 | 21828 | CG15347 | 33.04348    | 0.144532333 | 228.6234453 |
| 25 | N05 | 31008 | CG4136  | 33.30807667 | 0.134766    | 247.1548956 |
| 25 | N06 | 21829 | CG15357 | 34.23590667 | 0.129903333 | 263.5491006 |
| 25 | N07 | 31012 | CG5907  | 37.76883333 | 0.132223333 | 285.6442383 |
| 25 | N08 | 21830 | CG15376 | 35.80104    | 0.123741333 | 289.3215956 |
| 25 | N09 | 31010 | CG4944  | 30.92927    | 0.099974    | 309.373137  |
| 25 | N10 | 21826 | CG15277 | 30.52728333 | 0.126781667 | 240.7862598 |
| 25 | N11 | 31011 | CG5321  | 34.72898333 | 0.112358333 | 309.0913002 |
| 25 | N12 | 20086 | CG6631  | 36.44769333 | 0.125834333 | 289.6482412 |
| 25 | N13 | 30998 | CG4349  | 33.67558    | 0.107254333 | 313.9787359 |
| 25 | N14 | 20103 | CG5175  | 36.61604333 | 0.115928333 | 315.8506836 |
| 25 | N15 | 23244 | CG2989  | 33.56696    | 0.102062667 | 328.8857826 |
| 25 | N16 | 20104 | CG5273  | 35.14215667 | 0.106762333 | 329.1625011 |
| 25 | N17 | 23265 | CG1673  | 40.80959    | 0.111072667 | 367.413435  |
| 25 | N18 | 20099 | CG6843  | 31.45697333 | 0.103094667 | 305.1270677 |
| 25 | N19 | 23264 | CG1641  | 35.51591    | 0.098231333 | 361.5537812 |
| 25 | N20 | 20077 | CG4354  | 28.34756667 | 0.095257333 | 297.589337  |
| 25 | N21 | 23278 | CG1732  | 33.56085667 | 0.095749    | 350.5086911 |
| 25 | N22 | 20112 | CG7704  | 8.653567    | 0.085325333 | 101.4184963 |
| 25 | N23 | 23257 | CG1385  | 32.02014333 | 0.090218667 | 354.9170534 |
| 25 | N24 | 20085 | CG4194  | 33.19677667 | 0.084221667 | 394.1595789 |
| 25 | O01 | 30543 | CG6571  | 38.97239333 | 0.148715    | 262.0609443 |
| 25 | O02 | 28638 | CG13889 | 38.55683    | 0.152257    | 253.2351879 |
| 25 | O03 | 30542 | CG6517  | 35.32722    | 0.139038333 | 254.0825911 |
| 25 | O04 | 28617 | CG14033 | 31.15216    | 0.134701667 | 231.2678141 |
| 25 | O05 | 30472 | CG6586  | 36.05454333 | 0.147118667 | 245.071167  |

|    |     |       |                 |             |             |             |
|----|-----|-------|-----------------|-------------|-------------|-------------|
| 25 | O06 | 28639 | CG13953         | 32.53371333 | 0.145354    | 223.8239975 |
| 25 | O07 | 30484 | CG6593          | 33.68309667 | 0.124056333 | 271.514527  |
| 25 | O08 | 31422 | CG6277          | 36.33724    | 0.143123333 | 253.8876028 |
| 25 | O09 | 30496 | CG6601          | 37.23500333 | 0.147111667 | 253.1070729 |
| 25 | O10 | 31468 | CG17637         | 33.27261667 | 0.140893    | 236.1552147 |
| 25 | O11 | 30539 | CG7075          | 34.04725667 | 0.135165667 | 251.8927884 |
| 25 | O12 | 31414 | CG18606         | 36.90049333 | 0.136150333 | 271.0275651 |
| 25 | O13 | 30547 | CG6896          | 36.48137667 | 0.119103333 | 306.3002155 |
| 25 | O14 | 31502 | CG32274         | 31.68917333 | 0.118151667 | 268.2075863 |
| 25 | O15 | 28623 | CG13564         | 31.01144    | 0.125038333 | 248.0154619 |
| 25 | O16 | 31503 | CG4181          | 30.78536333 | 0.101355667 | 303.7359858 |
| 25 | O17 | 28565 | CG13720         | 37.10274    | 0.128027667 | 289.8025166 |
| 25 | O18 | 31456 | CG17556         | 32.03907    | 0.115146    | 278.2473555 |
| 25 | O19 | 28628 | CG13297         | 34.63714333 | 0.112849333 | 306.9326358 |
| 25 | O20 | 31501 | CG32164         | 34.60174333 | 0.103411667 | 334.6019308 |
| 25 | O21 |       | wts             | 114.6571333 | 0.084975    | 1349.304305 |
| 25 | O22 |       | HFA17794        | 2.717269667 | 0.033678    | 80.68381931 |
| 25 | O23 |       | hpo             | 81.85677    | 0.092017667 | 889.5766755 |
| 25 | O24 |       | Luc             | 5.872492    | 0.095116667 | 61.73988435 |
| 25 | P01 | 31483 | CG7294          | 33.22041333 | 0.194338667 | 170.9408318 |
| 25 | P02 | 21823 | CG16961         | 34.80261333 | 0.163763333 | 212.517739  |
| 25 | P03 | 30984 | CG3869          | 32.16591333 | 0.183289667 | 175.4922354 |
| 25 | P04 | 21840 | CG15348         | 24.96234667 | 0.125834    | 198.3752139 |
| 25 | P05 | 31020 | CG4198          | 32.88615    | 0.143326    | 229.4499951 |
| 25 | P06 | 21841 | CG31663         | 27.20883667 | 0.158614333 | 171.5408444 |
| 25 | P07 | 31018 | CG8128          | 29.25578333 | 0.136694333 | 214.0233806 |
| 25 | P08 | 21837 | CG15252         | 26.56386333 | 0.136871333 | 194.0790864 |
| 25 | P09 | 31017 | CG7481          | 24.49147    | 0.125445333 | 195.2361985 |
| 25 | P10 | 21838 | CG15284         | 27.01380667 | 0.130211    | 207.4617864 |
| 25 | P11 | 31023 | CG5334          | 32.42829333 | 0.128632333 | 252.1006383 |
| 25 | P12 | 20105 | CG5436          | 20.95828333 | 0.101670333 | 206.1396146 |
| 25 | P13 | 31009 | CG4523          | 31.31477333 | 0.125311333 | 249.8957796 |
| 25 | P14 | 20115 | CG5185          | 26.24584667 | 0.117360667 | 223.6340966 |
| 25 | P15 | 23254 | CG1718          | 30.68120667 | 0.133501667 | 229.8189036 |
| 25 | P16 | 20116 | CG17230         | 28.09628333 | 0.117002    | 240.1350689 |
| 25 | P17 | 23277 | CG1675          | 29.24859333 | 0.104408667 | 280.1356848 |
| 25 | P18 | 20109 | CG4262          | 30.6745     | 0.114293667 | 268.3832    |
| 25 | P19 | 23276 | CG11125,CG30502 | 31.56409333 | 0.109495    | 288.2697231 |
| 25 | P20 | 20114 | CG32767,CG40450 | 28.03695667 | 0.10057     | 278.7805177 |
| 25 | P21 |       | wts             | 106.87124   | 0.086882667 | 1230.063994 |
| 25 | P22 |       | HFA17794        | 2.550368    | 0.037296667 | 68.38058808 |
| 25 | P23 |       | hpo             | 76.24823333 | 0.095983    | 794.3931043 |
| 25 | P24 |       | Luc             | 4.677396667 | 0.097974667 | 47.74087859 |
| 26 | A01 |       | DIAP1           | 0.951690667 | 0.033202333 | 28.66336703 |
| 26 | A02 |       | ex/ft           | 84.83394333 | 0.110385667 | 768.5231778 |
| 26 | A03 |       | Luc             | 4.125334667 | 0.121241667 | 34.02571723 |
| 26 | A04 |       | hpo             | 73.79590333 | 0.115721667 | 637.701698  |
| 26 | A05 | 24624 | CG14882         | 30.46174    | 0.124948667 | 243.7940381 |
| 26 | A06 | 29596 | CG31422         | 27.61059667 | 0.117207    | 235.5712258 |
| 26 | A07 | 24629 | CG13630         | 30.61433333 | 0.126476333 | 242.055826  |
| 26 | A08 | 29597 | CG31446         | 26.73415667 | 0.111162667 | 240.4958199 |
| 26 | A09 | 24622 | CG14711,CG6808  | 29.39311333 | 0.127709    | 230.1569453 |
| 26 | A10 | 29598 | CG31460         | 26.45846333 | 0.119749    | 220.9493468 |
| 26 | A11 | 24642 | CG32590         | 30.15303333 | 0.116424333 | 258.9925359 |

|    |     |       |                 |             |             |             |
|----|-----|-------|-----------------|-------------|-------------|-------------|
| 26 | A12 | 29592 | CG31548         | 29.03848333 | 0.101332667 | 286.5658656 |
| 26 | A13 | 21557 | CG8332          | 12.25687    | 0.108897333 | 112.5543631 |
| 26 | A14 | 29600 | CG31508         | 23.79471333 | 0.111137333 | 214.101892  |
| 26 | A15 | 21564 | CG7445          | 24.81061    | 0.095309667 | 260.3157777 |
| 26 | A16 | 29591 | CG31529         | 29.57957    | 0.100891667 | 293.1814983 |
| 26 | A17 | 21562 | CG7252          | 23.97441333 | 0.096556333 | 248.2945707 |
| 26 | A18 | 29631 | CG31411         | 25.83580333 | 0.092315333 | 279.8647029 |
| 26 | A19 | 21565 | CG8132          | 27.55974333 | 0.099879    | 275.9313102 |
| 26 | A20 | 24621 | CG12333         | 26.08599333 | 0.093712667 | 278.3614453 |
| 26 | A21 | 21566 | CG8192          | 21.7338     | 0.097635    | 222.6025503 |
| 26 | A22 | 24626 | CG12692         | 25.83527333 | 0.098209333 | 263.0633205 |
| 26 | A23 | 21568 | CG7058          | 20.95631667 | 0.122008667 | 171.7608858 |
| 26 | A24 | 24627 | CG13369         | 30.37718667 | 0.105224333 | 288.6897517 |
| 26 | B01 |       | DIAP1           | 1.116721    | 0.037357    | 29.89321948 |
| 26 | B02 |       | ex/ft           | 85.92879    | 0.133193667 | 645.1417109 |
| 26 | B03 |       | Luc             | 4.380212333 | 0.153319667 | 28.56914855 |
| 26 | B04 |       | hpo             | 68.85921333 | 0.12621     | 545.5923725 |
| 26 | B05 | 18327 | CG2913          | 31.00129    | 0.147274    | 210.5007673 |
| 26 | B06 | 32052 | CG10752         | 33.00416    | 0.122826    | 268.7066256 |
| 26 | B07 | 18329 | CG3717          | 34.54401667 | 0.135507333 | 254.9235958 |
| 26 | B08 | 32084 | CG11279         | 28.53764667 | 0.156625    | 182.2036499 |
| 26 | B09 | 18332 | CG3810          | 33.40917    | 0.116535333 | 286.687042  |
| 26 | B10 | 32092 | CG11349         | 31.43428667 | 0.116063667 | 270.8365811 |
| 26 | B11 | 18322 | CG3850          | 24.54038    | 0.116176333 | 211.2339002 |
| 26 | B12 | 32108 | CG11650         | 29.18521667 | 0.117756333 | 247.8441358 |
| 26 | B13 | 18330 | CG3756          | 12.95761    | 0.154621    | 83.80239424 |
| 26 | B14 | 32068 | CG11008         | 26.47441333 | 0.112938667 | 234.4140773 |
| 26 | B15 | 18348 | CG3983          | 18.10732    | 0.153945    | 117.6220079 |
| 26 | B16 | 32076 | CG11156         | 22.46780667 | 0.105089    | 213.7978919 |
| 26 | B17 | 18362 | CG2875          | 27.39542333 | 0.131869333 | 207.7467341 |
| 26 | B18 | 32036 | CG10604         | 24.92441667 | 0.104938667 | 237.5141352 |
| 26 | B19 | 31033 | CG32601,CG32598 | 31.16363667 | 0.106003333 | 293.9873274 |
| 26 | B20 | 32060 | CG10904         | 23.17192    | 0.097785    | 236.9680421 |
| 26 | B21 | 31044 | CG9176          | 26.04849333 | 0.111562333 | 233.4882442 |
| 26 | B22 | 21752 | CG15194         | 28.79969667 | 0.096388    | 298.7892338 |
| 26 | B23 | 31043 | CG8995          | 30.45517667 | 0.091638333 | 332.3410145 |
| 26 | B24 | 21753 | CG15239         | 30.03555667 | 0.093366    | 321.6969418 |
| 26 | C01 | 24640 | CG13431         | 33.14533333 | 0.133828333 | 247.6705232 |
| 26 | C02 | 29611 | CG31488         | 35.18826667 | 0.127531    | 275.919319  |
| 26 | C03 | 24635 | CG14792         | 5.373401333 | 0.131534333 | 40.85170158 |
| 26 | C04 | 29618 | CG31391         | 35.58144    | 0.116709    | 304.873146  |
| 26 | C05 | 24668 | CG32922         | 30.88641333 | 0.112533667 | 274.4637605 |
| 26 | C06 | 29608 | CG31423         | 37.04171    | 0.116626333 | 317.6101738 |
| 26 | C07 | 24641 | CG31120         | 34.27144    | 0.122097667 | 280.6887383 |
| 26 | C08 | 29609 | CG31448         | 39.30270333 | 0.123746333 | 317.6070133 |
| 26 | C09 | 24634 | CG14715         | 35.90380667 | 0.109253    | 328.6299385 |
| 26 | C10 | 29610 | CG31461         | 40.04184    | 0.111620333 | 358.732489  |
| 26 | C11 | 24654 | CG14408         | 35.73468667 | 0.119948333 | 297.9173255 |
| 26 | C12 | 29604 | CG31549         | 36.15726667 | 0.110007667 | 328.6795163 |
| 26 | C13 | 21569 | CG8342          | 33.23214333 | 0.094027    | 353.431922  |
| 26 | C14 | 29612 | CG31509         | 35.62308667 | 0.107668333 | 330.8594604 |
| 26 | C15 | 21575 | CG7367          | 34.73214    | 0.106292333 | 326.7605378 |
| 26 | C16 | 29603 | CG31533         | 37.60841333 | 0.107768    | 348.9757009 |
| 26 | C17 | 21639 | CG8321          | 34.55869    | 0.091284333 | 378.5829259 |

|    |     |       |                |             |             |             |
|----|-----|-------|----------------|-------------|-------------|-------------|
| 26 | C18 | 29643 | CG31412        | 35.66436667 | 0.101308333 | 352.0378383 |
| 26 | C19 | 21577 | CG8134         | 33.46028667 | 0.106180667 | 315.1259802 |
| 26 | C20 | 24685 | CG32444        | 32.87770333 | 0.087624333 | 375.2120225 |
| 26 | C21 | 21578 | CG8200         | 33.00129333 | 0.109424333 | 301.590079  |
| 26 | C22 | 24697 | CG12598        | 33.56812667 | 0.094346667 | 355.7955766 |
| 26 | C23 | 21580 | CG7066         | 37.93539333 | 0.10894     | 348.2228138 |
| 26 | C24 | 24639 | CG32199        | 39.73313333 | 0.092105667 | 431.3864149 |
| 26 | D01 | 18343 | CG3792         | 45.4077     | 0.158547333 | 286.3983837 |
| 26 | D02 | 32045 | CG10658        | 34.96427    | 0.148968667 | 234.7088873 |
| 26 | D03 | 18335 | CG3943         | 33.18624667 | 0.127874333 | 259.5223436 |
| 26 | D04 | 32100 | CG11451        | 23.82282333 | 0.21836     | 109.0988429 |
| 26 | D05 | 18339 | CG2914         | 30.21147    | 0.133040333 | 227.0850444 |
| 26 | D06 | 32053 | CG10759        | 42.76672333 | 0.131463667 | 325.3121141 |
| 26 | D07 | 18341 | CG3724         | 42.47055333 | 0.135511333 | 313.4096041 |
| 26 | D08 | 32085 | CG11286        | 31.20277333 | 0.132304667 | 235.840308  |
| 26 | D09 | 18344 | CG3815         | 35.16011    | 0.124414667 | 282.6042214 |
| 26 | D10 | 32093 | CG11362        | 33.98274333 | 0.118334667 | 287.1748769 |
| 26 | D11 | 18334 | CG3860         | 39.92897667 | 0.134335333 | 297.2336144 |
| 26 | D12 | 32109 | CG11656        | 39.90001    | 0.121938333 | 327.2146577 |
| 26 | D13 | 18342 | CG3763         | 43.09325333 | 0.123167    | 349.8766174 |
| 26 | D14 | 32069 | CG11037        | 37.54466333 | 0.113541333 | 330.6695653 |
| 26 | D15 | 18360 | CG3996         | 30.10901    | 0.128885333 | 233.6108324 |
| 26 | D16 | 32077 | CG11175        | 27.68418    | 0.116904333 | 236.8105545 |
| 26 | D17 | 18374 | CG2889         | 36.01441333 | 0.117279333 | 307.0823504 |
| 26 | D18 | 32037 | CG10616        | 34.05664667 | 0.108777667 | 313.0849163 |
| 26 | D19 | 31045 | CG9413         | 32.89377667 | 0.112676    | 291.9324139 |
| 26 | D20 | 32061 | CG10934        | 32.12120333 | 0.106864    | 300.5802079 |
| 26 | D21 | 31056 | CG9195         | 38.69608    | 0.094764333 | 408.340128  |
| 26 | D22 | 21764 | CG15196        | 33.30572    | 0.096509667 | 345.102425  |
| 26 | D23 | 32022 | CG10152        | 33.70669667 | 0.093815    | 359.2889907 |
| 26 | D24 | 21765 | CG15240        | 40.54551667 | 0.093068    | 435.6547542 |
| 26 | E01 | 24652 | CG13478        | 52.31308333 | 0.130384667 | 401.2211303 |
| 26 | E02 | 29623 | CG31493        | 45.94349    | 0.126649667 | 362.7604494 |
| 26 | E03 | 24647 | CG14802        | 41.12854    | 0.114418    | 359.4586516 |
| 26 | E04 | 29630 | CG31394        | 40.05095333 | 0.119099    | 336.2828683 |
| 26 | E05 | 24648 | CG14894        | 36.19440667 | 0.117599333 | 307.7773117 |
| 26 | E06 | 29620 | CG31424        | 46.23669    | 0.118661333 | 389.6525406 |
| 26 | E07 | 24653 | CG13645        | 40.89609    | 0.116287    | 351.6823893 |
| 26 | E08 | 29621 | CG31450        | 55.57111    | 0.116034333 | 478.9195439 |
| 26 | E09 | 24646 | CG14721,CG6920 | 47.33339667 | 0.124380333 | 380.5537049 |
| 26 | E10 | 29622 | CG31465        | 38.17777    | 0.110977    | 344.0151563 |
| 26 | E11 | 24716 | CG14710,CG6808 | 33.59846    | 0.101704667 | 330.3531795 |
| 26 | E12 | 29616 | CG31554        | 41.55259667 | 0.106961333 | 388.4824111 |
| 26 | E13 | 21581 | CG8349         | 40.82999    | 0.106781667 | 382.3689148 |
| 26 | E14 | 29624 | CG31510        | 37.45919333 | 0.109547333 | 341.9452778 |
| 26 | E15 | 21587 | CG7368         | 33.90492333 | 0.097689333 | 347.0688373 |
| 26 | E16 | 29615 | CG31535        | 39.56050333 | 0.092662    | 426.9334067 |
| 26 | E17 | 21586 | CG7272         | 38.97012667 | 0.096113667 | 405.458745  |
| 26 | E18 | 29655 | CG31413        | 38.54807333 | 0.111075    | 347.0454498 |
| 26 | E19 | 21644 | CG7175         | 41.91224667 | 0.104142    | 402.4528688 |
| 26 | E20 | 24645 | CG12342        | 31.52657333 | 0.089728    | 351.3571386 |
| 26 | E21 | 21591 | CG8260         | 38.12393333 | 0.087568333 | 435.3620982 |
| 26 | E22 | 24650 | CG13322        | 39.8931     | 0.094516333 | 422.0762549 |
| 26 | E23 | 21592 | CG7071         | 41.56509667 | 0.077484333 | 536.432268  |

|    |     |       |         |             |             |             |
|----|-----|-------|---------|-------------|-------------|-------------|
| 26 | E24 | 24651 | CG13384 | 43.11544333 | 0.08776     | 491.2880963 |
| 26 | F01 | 18355 | CG3793  | 35.42122    | 0.13182     | 268.7089971 |
| 26 | F02 | 32046 | CG10660 | 37.34369333 | 0.128687    | 290.1900995 |
| 26 | F03 | 18400 | CG3710  | 40.89962    | 0.138775    | 294.7189335 |
| 26 | F04 | 32101 | CG11498 | 39.50273    | 0.120916667 | 326.6938387 |
| 26 | F05 | 18351 | CG2915  | 43.53897667 | 0.132561667 | 328.44319   |
| 26 | F06 | 32054 | CG10789 | 38.20306667 | 0.127258    | 300.20169   |
| 26 | F07 | 18353 | CG3730  | 44.79468333 | 0.124262    | 360.4857747 |
| 26 | F08 | 32086 | CG11298 | 37.57789333 | 0.124113667 | 302.7699877 |
| 26 | F09 | 18356 | CG3819  | 37.11026333 | 0.111981    | 331.3978562 |
| 26 | F10 | 32094 | CG11368 | 39.0049     | 0.120072667 | 324.8441222 |
| 26 | F11 | 18346 | CG32174 | 41.71488667 | 0.122110667 | 341.6154199 |
| 26 | F12 | 32110 | CG11658 | 34.60752667 | 0.086820333 | 398.6108477 |
| 26 | F13 | 18354 | CG3764  | 43.43570333 | 0.109296667 | 397.4110525 |
| 26 | F14 | 32066 | CG10987 | 31.71066    | 0.099839    | 317.6179649 |
| 26 | F15 | 18372 | CG3998  | 29.43889333 | 0.111503    | 264.0188455 |
| 26 | F16 | 32067 | CG10989 | 29.62706667 | 0.108349667 | 273.4393891 |
| 26 | F17 | 18386 | CG2890  | 26.14642667 | 0.108740333 | 240.4482851 |
| 26 | F18 | 32038 | CG10619 | 30.24863333 | 0.104867667 | 288.4457554 |
| 26 | F19 | 31058 | CG9842  | 35.74136    | 0.079910333 | 447.2683132 |
| 26 | F20 | 32062 | CG10936 | 39.52217667 | 0.075539333 | 523.1999665 |
| 26 | F21 | 31052 | CG13367 | 34.13959667 | 0.095068667 | 359.1046121 |
| 26 | F22 | 21776 | CG15212 | 36.78158667 | 0.085323667 | 431.0830524 |
| 26 | F23 | 32031 | CG10565 | 26.46505667 | 0.082313333 | 321.5160363 |
| 26 | F24 | 21777 | CG15245 | 37.49904333 | 0.080490333 | 465.8825697 |
| 26 | G01 | 24664 | CG30275 | 39.38614    | 0.115813333 | 340.0829496 |
| 26 | G02 | 29635 | CG31495 | 43.26792    | 0.118474667 | 365.208202  |
| 26 | G03 | 24659 | CG14804 | 36.67838333 | 0.108791333 | 337.1443497 |
| 26 | G04 | 29642 | CG31395 | 42.31275667 | 0.131501667 | 321.7659345 |
| 26 | G05 | 24660 | CG15483 | 42.83161333 | 0.119545    | 358.2886221 |
| 26 | G06 | 29632 | CG31426 | 40.61653333 | 0.117598    | 345.3845587 |
| 26 | G07 | 24680 | CG14691 | 38.91866    | 0.114316333 | 340.4470636 |
| 26 | G08 | 29633 | CG31451 | 39.14973667 | 0.118442333 | 330.5383773 |
| 26 | G09 | 24714 | CG14516 | 46.94779    | 0.123660667 | 379.6501448 |
| 26 | G10 | 29634 | CG31466 | 44.29803333 | 0.112361    | 394.2474109 |
| 26 | G11 | 21572 | CG7131  | 34.39320333 | 0.100683667 | 341.5966509 |
| 26 | G12 | 29628 | CG31555 | 40.04970333 | 0.105126    | 380.9685837 |
| 26 | G13 | 21593 | CG8357  | 41.59692333 | 0.091995667 | 452.1617685 |
| 26 | G14 | 29636 | CG31513 | 40.2371     | 0.105653667 | 380.8395986 |
| 26 | G15 | 21600 | CG8103  | 39.47087    | 0.116678    | 338.2888805 |
| 26 | G16 | 29627 | CG31537 | 38.85050333 | 0.099075333 | 392.1309374 |
| 26 | G17 | 21598 | CG7292  | 8.116774333 | 0.087967667 | 92.2699742  |
| 26 | G18 | 29667 | CG31414 | 36.65344333 | 0.092640667 | 395.6517656 |
| 26 | G19 | 21601 | CG8149  | 36.3399     | 0.096084333 | 378.2083794 |
| 26 | G20 | 24657 | CG12346 | 40.31173    | 0.085004333 | 474.2314706 |
| 26 | G21 | 21602 | CG8214  | 39.41479    | 0.090342667 | 436.2810116 |
| 26 | G22 | 24662 | CG13325 | 40.51844333 | 0.086351    | 469.2295785 |
| 26 | G23 | 21604 | CG7076  | 36.84325    | 0.080767    | 456.1671227 |
| 26 | G24 | 24663 | CG13390 | 42.95918    | 0.08862     | 484.7571654 |
| 26 | H01 | 18367 | CG3795  | 36.81422333 | 0.126315    | 291.4477563 |
| 26 | H02 | 32047 | CG10677 | 39.14367    | 0.134634667 | 290.7399035 |
| 26 | H03 | 18359 | CG3947  | 41.90186333 | 0.138780667 | 301.9286788 |
| 26 | H04 | 32102 | CG11550 | 29.69816333 | 0.120923    | 245.5956545 |
| 26 | H05 | 18363 | CG2917  | 35.82669    | 0.131364    | 272.7283731 |

|    |     |       |         |             |             |             |
|----|-----|-------|---------|-------------|-------------|-------------|
| 26 | H06 | 32055 | CG10799 | 37.3346     | 0.12577     | 296.848215  |
| 26 | H07 | 18365 | CG3732  | 34.23182667 | 0.116768333 | 293.160189  |
| 26 | H08 | 32087 | CG11312 | 37.79879667 | 0.114921    | 328.9111361 |
| 26 | H09 | 18368 | CG3829  | 29.27096333 | 0.120491333 | 242.9300309 |
| 26 | H10 | 32095 | CG11370 | 38.55058667 | 0.131013333 | 294.2493385 |
| 26 | H11 | 18358 | CG3879  | 37.47157    | 0.119586333 | 313.3432471 |
| 26 | H12 | 32111 | CG11669 | 42.76295667 | 0.10632     | 402.2099009 |
| 26 | H13 | 18366 | CG31475 | 39.57616    | 0.101938333 | 388.2362866 |
| 26 | H14 | 32071 | CG11076 | 38.62926333 | 0.105335667 | 366.725389  |
| 26 | H15 | 18384 | CG3999  | 31.63552    | 0.099195667 | 318.9203829 |
| 26 | H16 | 32079 | CG11226 | 34.95062667 | 0.105701    | 330.6555914 |
| 26 | H17 | 31059 | CG32508 | 34.27408667 | 0.092906667 | 368.9087974 |
| 26 | H18 | 32039 | CG10625 | 31.2883     | 0.096353667 | 324.7235013 |
| 26 | H19 | 31069 | CG9902  | 36.13586    | 0.089057    | 405.7610295 |
| 26 | H20 | 21748 | CG33202 | 35.00340667 | 0.095193333 | 367.708593  |
| 26 | H21 | 31065 | CG12529 | 34.03786667 | 0.091011    | 373.9972824 |
| 26 | H22 | 21788 | CG15213 | 34.99189    | 0.093889667 | 372.691599  |
| 26 | H23 | 32032 | CG10566 | 39.49551333 | 0.078445    | 503.4803153 |
| 26 | H24 | 21789 | CG15247 | 38.77213    | 0.075303    | 514.8816116 |
| 26 | I01 | 24643 | CG14542 | 11.404698   | 0.430615667 | 26.48463324 |
| 26 | I02 | 29647 | CG31496 | 44.80196667 | 0.131566    | 340.5284547 |
| 26 | I03 | 24632 | CG14644 | 36.42799333 | 0.120385333 | 302.5949451 |
| 26 | I04 | 29654 | CG31397 | 34.19785667 | 0.134492333 | 254.2736513 |
| 26 | I05 | 24672 | CG15509 | 78.88057333 | 0.261968333 | 301.107284  |
| 26 | I06 | 29644 | CG31427 | 30.08399    | 0.129194667 | 232.8578321 |
| 26 | I07 | 24677 | CG13761 | 34.97428667 | 0.138321667 | 252.8474932 |
| 26 | I08 | 29645 | CG31140 | 34.50988    | 0.118479667 | 291.2725953 |
| 26 | I09 | 24670 | CG31368 | 45.18752333 | 0.153185667 | 294.9853228 |
| 26 | I10 | 29646 | CG31467 | 35.80961333 | 0.113456333 | 315.6246309 |
| 26 | I11 | 21584 | CG7138  | 31.73442667 | 0.113203667 | 280.330378  |
| 26 | I12 | 29640 | CG31557 | 30.92089    | 0.107461    | 287.7405757 |
| 26 | I13 | 21605 | CG8359  | 33.28089333 | 0.103533    | 321.452033  |
| 26 | I14 | 29648 | CG31515 | 32.25541    | 0.115940333 | 278.20698   |
| 26 | I15 | 21612 | CG31190 | 30.72990333 | 0.101531333 | 302.664235  |
| 26 | I16 | 29639 | CG31538 | 34.87816333 | 0.114146333 | 305.5565809 |
| 26 | I17 | 21618 | CG8436  | 32.93115667 | 0.095303    | 345.5416584 |
| 26 | I18 | 29679 | CG31421 | 31.62544667 | 0.091871667 | 344.235038  |
| 26 | I19 | 21613 | CG8161  | 29.05066    | 0.095144    | 305.3335996 |
| 26 | I20 | 24669 | CG12366 | 31.55903    | 0.102091    | 309.1264656 |
| 26 | I21 | 21615 | CG8292  | 31.31446    | 0.090482333 | 346.0836922 |
| 26 | I22 | 24674 | CG13344 | 30.32027333 | 0.103404    | 293.2214743 |
| 26 | I23 | 21616 | CG7080  | 33.20092667 | 0.087103333 | 381.1671195 |
| 26 | I24 | 24709 | CG11348 | 34.43483667 | 0.089694333 | 383.9131792 |
| 26 | J01 | 18379 | CG3803  | 35.32669667 | 0.155409333 | 227.3138679 |
| 26 | J02 | 32048 | CG10694 | 26.62797333 | 0.144899333 | 183.7687774 |
| 26 | J03 | 18371 | CG3959  | 32.42703333 | 0.154330667 | 210.1139977 |
| 26 | J04 | 32065 | CG10969 | 27.60647667 | 0.141131333 | 195.6084167 |
| 26 | J05 | 18375 | CG2918  | 31.98701667 | 0.127949667 | 249.9968738 |
| 26 | J06 | 32056 | CG10800 | 2.275563    | 0.054344    | 41.87330708 |
| 26 | J07 | 18377 | CG3736  | 33.58526    | 0.159694333 | 210.3096541 |
| 26 | J08 | 32088 | CG11317 | 27.92958    | 0.120588667 | 231.6103227 |
| 26 | J09 | 18380 | CG3832  | 30.36773333 | 0.12021     | 252.6223553 |
| 26 | J10 | 32096 | CG11372 | 36.08561333 | 0.115668    | 311.9757697 |
| 26 | J11 | 18370 | CG33052 | 32.20762    | 0.116040667 | 277.5545929 |

|    |     |       |               |             |             |             |
|----|-----|-------|---------------|-------------|-------------|-------------|
| 26 | J12 | 32112 | CG11686       | 31.02994667 | 0.119345    | 260.0020668 |
| 26 | J13 | 18378 | CG3776        | 33.98686    | 0.102428667 | 331.8100402 |
| 26 | J14 | 32072 | CG11113       | 25.72929667 | 0.090564667 | 284.0986183 |
| 26 | J15 | 18396 | CG4003        | 30.30441    | 0.170483    | 177.7561986 |
| 26 | J16 | 32080 | CG11229       | 33.21329667 | 0.128189333 | 259.0956346 |
| 26 | J17 | 31084 | CG12432       | 28.96837667 | 0.105673667 | 274.130515  |
| 26 | J18 | 32107 | CG11637       | 30.74752667 | 0.108261667 | 284.0112074 |
| 26 | J19 | 31074 | CG8568        | 30.89373667 | 0.10185     | 303.3258387 |
| 26 | J20 | 21760 | CG33202       | 29.48009333 | 0.092458333 | 318.8473366 |
| 26 | J21 | 31091 | CG9216        | 28.92463667 | 0.089103    | 324.6202335 |
| 26 | J22 | 21800 | CG15219       | 30.45733667 | 0.084965    | 358.4692128 |
| 26 | J23 | 32033 | CG10574       | 28.95206333 | 0.089548667 | 323.3109371 |
| 26 | J24 | 21808 | CG15186       | 31.80852333 | 0.083254667 | 382.0629474 |
| 26 | K02 | 29659 | CG31498       | 36.70512    | 0.141337667 | 259.6980753 |
| 26 | K03 | 24683 | CG14816       | 29.61894667 | 0.122149    | 242.4821052 |
| 26 | K04 | 29666 | CG31404       | 29.57036333 | 0.136940333 | 215.9361133 |
| 26 | K05 | 24684 | CG31033       | 30.50859    | 0.125221333 | 243.6373195 |
| 26 | K06 | 29656 | CG31437       | 33.17269333 | 0.110273333 | 300.8224412 |
| 26 | K07 | 24704 | CG14709       | 28.93721    | 0.130036333 | 222.5317283 |
| 26 | K08 | 29657 | CG31454       | 31.87983667 | 0.118494333 | 269.0410231 |
| 26 | K09 | 24682 | CG14736       | 27.96056    | 0.115919667 | 241.2063527 |
| 26 | K1  | 24655 | CG14544       | 31.26601    | 0.118650333 | 263.5138825 |
| 26 | K10 | 29658 | CG31468       | 29.77689    | 0.115526667 | 257.7490623 |
| 26 | K11 | 21596 | CG7157        | 28.45906667 | 0.121581333 | 234.0743097 |
| 26 | K12 | 29652 | CG31558       | 34.71952667 | 0.109329    | 317.5692329 |
| 26 | K13 | 21617 | CG8368        | 26.49777    | 0.096820333 | 273.6798056 |
| 26 | K14 | 29650 | CG31525       | 31.2233     | 0.109308    | 285.6451495 |
| 26 | K15 | 21624 | CG8118        | 12.15078967 | 0.114646    | 105.985291  |
| 26 | K16 | 29662 | CG31526       | 30.92523667 | 0.113237    | 273.1018719 |
| 26 | K17 | 21630 | CG8279,CG8461 | 28.47856667 | 0.107817333 | 264.1371826 |
| 26 | K18 | 29674 | CG31528       | 31.14441    | 0.098637333 | 315.7466747 |
| 26 | K19 | 21597 | CG7216        | 30.35346667 | 0.092675    | 327.5259419 |
| 26 | K20 | 24681 | CG12367       | 31.88331667 | 0.094754333 | 336.4839955 |
| 26 | K21 | 21627 | CG8297        | 27.49760333 | 0.102525667 | 268.2021413 |
| 26 | K22 | 24686 | CG13348       | 28.78787    | 0.091528    | 314.5252819 |
| 26 | K23 | 21647 | CG7443        | 30.27097    | 0.092035333 | 328.9059637 |
| 26 | K24 | 24687 | CG13400       | 36.53633333 | 0.084699333 | 431.3650639 |
| 26 | L01 | 18391 | CG3806        | 30.35290333 | 0.141922333 | 213.8698161 |
| 26 | L02 | 32049 | CG10710       | 31.88375333 | 0.135234    | 235.7672873 |
| 26 | L03 | 18410 | CG2910        | 20.64435667 | 0.170422667 | 121.1362143 |
| 26 | L04 | 32104 | CG11563       | 30.64535    | 0.148263    | 206.6958715 |
| 26 | L05 | 18387 | CG14764       | 30.72959    | 0.134631667 | 228.249347  |
| 26 | L06 | 32057 | CG10816       | 25.24915    | 0.127281667 | 198.3722453 |
| 26 | L07 | 18389 | CG3743        | 27.47346    | 0.124151333 | 221.2900922 |
| 26 | L08 | 32089 | CG11322       | 30.00601667 | 0.116678333 | 257.1687117 |
| 26 | L09 | 18392 | CG3835        | 34.35238333 | 0.123889333 | 277.2828169 |
| 26 | L10 | 32097 | CG11373       | 30.66505    | 0.112142    | 273.4483958 |
| 26 | L11 | 18382 | CG3889        | 15.39893    | 0.098599333 | 156.1768166 |
| 26 | L12 | 32113 | CG11699       | 26.09218    | 0.112073667 | 232.812763  |
| 26 | L13 | 18412 | CG3714        | 31.53632333 | 0.117952333 | 267.3649808 |
| 26 | L14 | 32073 | CG11122       | 22.16112    | 0.117491    | 188.6197241 |
| 26 | L15 | 18408 | CG4019        | 29.43096    | 0.109831    | 267.9658748 |
| 26 | L16 | 32081 | CG11230       | 28.64817667 | 0.093754667 | 305.5653407 |
| 26 | L17 | 31096 | CG12993       | 28.38301667 | 0.097096333 | 292.3181102 |

|    |     |       |         |             |             |             |
|----|-----|-------|---------|-------------|-------------|-------------|
| 26 | L18 | 32041 | CG10629 | 24.11057    | 0.092661333 | 260.2009828 |
| 26 | L19 | 31097 | CG32499 | 27.59505667 | 0.105514    | 261.5298128 |
| 26 | L20 | 21772 | CG33202 | 27.14005333 | 0.087999    | 308.4132017 |
| 26 | L21 | 31087 | CG12481 | 28.11196667 | 0.084860667 | 331.2720459 |
| 26 | L22 | 21832 | CG15189 | 29.09235    | 0.090588667 | 321.1477889 |
| 26 | L23 | 32034 | CG10585 | 30.01327333 | 0.092471667 | 324.5672368 |
| 26 | L24 | 21820 | CG15188 | 30.18818667 | 0.08863     | 340.6091241 |
| 26 | M01 | 24700 | CG13570 | 39.26686333 | 0.176638667 | 222.3004967 |
| 26 | M02 | 29671 | CG31499 | 27.67110333 | 0.122472    | 225.9382008 |
| 26 | M03 | 24644 | CG14647 | 29.4164     | 0.148436    | 198.1756447 |
| 26 | M04 | 29678 | CG31405 | 28.39878    | 0.144778    | 196.1539737 |
| 26 | M05 | 24696 | CG15524 | 26.33309    | 0.121793333 | 216.2112595 |
| 26 | M06 | 29668 | CG31438 | 29.25064    | 0.126214667 | 231.7530979 |
| 26 | M07 | 24701 | CG31635 | 29.74053333 | 0.134036667 | 221.8835642 |
| 26 | M08 | 29669 | CG31457 | 29.87167333 | 0.115270667 | 259.1437544 |
| 26 | M09 | 24715 | CG14621 | 32.22075    | 0.131268333 | 245.4571425 |
| 26 | M10 | 29670 | CG31469 | 31.91944667 | 0.111796667 | 285.5134023 |
| 26 | M11 | 21608 | CG7162  | 16.48663    | 0.105417667 | 156.3934255 |
| 26 | M12 | 29638 | CG31524 | 38.60444    | 0.106406    | 362.8032254 |
| 26 | M13 | 21623 | CG7406  | 29.08096333 | 0.107384333 | 270.8119744 |
| 26 | M14 | 29672 | CG31517 | 29.26264667 | 0.122593667 | 238.696235  |
| 26 | M15 | 21633 | CG7248  | 32.36400667 | 0.111549333 | 290.1317803 |
| 26 | M16 | 29663 | CG31544 | 32.76165    | 0.110136    | 297.4654064 |
| 26 | M17 | 21634 | CG7348  | 30.71317    | 0.102716333 | 299.0096025 |
| 26 | M18 | 24649 | CG12512 | 29.13579667 | 0.09557     | 304.863416  |
| 26 | M19 | 21609 | CG7220  | 29.09080333 | 0.097294333 | 298.9979204 |
| 26 | M20 | 24693 | CG12369 | 30.59478333 | 0.109331    | 279.8363075 |
| 26 | M21 | 21638 | CG8235  | 30.84048    | 0.098490333 | 313.1320502 |
| 26 | M22 | 24698 | CG13349 | 23.63987667 | 0.102475333 | 230.6884584 |
| 26 | M23 | 21640 | CG7103  | 32.61238333 | 0.091029667 | 358.2610431 |
| 26 | M24 | 24699 | CG13401 | 35.67763333 | 0.107159    | 332.9410813 |
| 26 | N01 | 18403 | CG3808  | 31.75383    | 0.154060667 | 206.1125055 |
| 26 | N02 | 32050 | CG10734 | 34.22445    | 0.139857667 | 244.7091448 |
| 26 | N03 | 18395 | CG3962  | 35.76750667 | 0.148181667 | 241.3760587 |
| 26 | N04 | 32105 | CG11591 | 31.0463     | 0.129732    | 239.3110412 |
| 26 | N05 | 18399 | CG2929  | 30.85877    | 0.138791333 | 222.3393151 |
| 26 | N06 | 32058 | CG10881 | 36.92097    | 0.131269    | 281.2619126 |
| 26 | N07 | 18401 | CG3747  | 33.73376667 | 0.139089333 | 242.5330962 |
| 26 | N08 | 32090 | CG11327 | 34.85908    | 0.144615    | 241.0474709 |
| 26 | N09 | 18404 | CG3841  | 32.14153667 | 0.135167667 | 237.7901273 |
| 26 | N10 | 32098 | CG11406 | 29.45527333 | 0.121819333 | 241.7947343 |
| 26 | N11 | 18394 | CG3902  | 30.33874667 | 0.115964333 | 261.6213606 |
| 26 | N12 | 32114 | CG11722 | 33.51214    | 0.13106     | 255.7007477 |
| 26 | N13 | 18402 | CG3780  | 15.38973667 | 0.141515333 | 108.7496055 |
| 26 | N14 | 32074 | CG11127 | 31.97612    | 0.112975667 | 283.0354619 |
| 26 | N15 | 18376 | CG3702  | 29.098      | 0.098935333 | 294.111305  |
| 26 | N16 | 32082 | CG11231 | 32.43827667 | 0.112023667 | 289.5662821 |
| 26 | N17 | 31095 | CG11235 | 40.71627333 | 0.099226333 | 410.3373768 |
| 26 | N18 | 32042 | CG10633 | 30.25742333 | 0.117665333 | 257.1481547 |
| 26 | N19 | 31109 | CG13316 | 19.72246667 | 0.100417667 | 196.4043512 |
| 26 | N20 | 21784 | CG15184 | 25.94611    | 0.098306333 | 263.931215  |
| 26 | N21 | 31099 | CG13403 | 31.14833333 | 0.092727333 | 335.9131791 |
| 26 | N22 | 21824 | CG30295 | 30.67429333 | 0.099503667 | 308.272995  |
| 26 | N23 | 32035 | CG10591 | 32.64971667 | 0.099582333 | 327.866556  |



|    |     |       |                |             |             |             |
|----|-----|-------|----------------|-------------|-------------|-------------|
| 26 | N24 | 21825 | CG15251        | 31.31153333 | 0.095903667 | 326.4894286 |
| 26 | O01 | 24712 | CG13626        | 37.57462333 | 0.133042667 | 282.4253623 |
| 26 | O02 | 29683 | CG31507        | 35.46157667 | 0.169298    | 209.4624666 |
| 26 | O03 | 24707 | CG14857        | 30.23974    | 0.161017    | 187.8046417 |
| 26 | O04 | 29626 | CG31522        | 31.13954333 | 0.131251333 | 237.2512533 |
| 26 | O05 | 24708 | CG15625        | 32.94836333 | 0.130752667 | 251.9899913 |
| 26 | O06 | 29680 | CG31439        | 35.01581667 | 0.144989    | 241.506712  |
| 26 | O07 | 24711 | CG31431        | 32.66479667 | 0.128933    | 253.3470614 |
| 26 | O08 | 29681 | CG31459        | 34.75881    | 0.121224667 | 286.7305059 |
| 26 | O09 | 24706 | CG14786        | 33.27720333 | 0.141619667 | 234.9758626 |
| 26 | O10 | 29682 | CG31473        | 33.85453333 | 0.128967    | 262.5053954 |
| 26 | O11 | 21620 | CG7164         | 33.51863    | 0.120142667 | 278.9902283 |
| 26 | O12 | 29676 | CG31561        | 36.89798    | 0.135060667 | 273.195601  |
| 26 | O13 | 21635 | CG7417         | 36.25267667 | 0.131156667 | 276.4074262 |
| 26 | O14 | 29684 | CG31519        | 33.30043    | 0.116601333 | 285.5921888 |
| 26 | O15 | 21648 | CG8121         | 32.63841667 | 0.111880333 | 291.72613   |
| 26 | O16 | 29675 | CG31545        | 35.62801667 | 0.117981333 | 301.9801155 |
| 26 | O17 | 21646 | CG13698,CG7354 | 17.12247    | 0.113094333 | 151.3998933 |
| 26 | O18 | 24673 | CG40277        | 29.37060667 | 0.100390333 | 292.5640915 |
| 26 | O19 | 21621 | CG7242         | 36.81342667 | 0.110853667 | 332.0902932 |
| 26 | O20 | 24705 | CG12376        | 33.12342333 | 0.105095667 | 315.1740161 |
| 26 | O21 |       | wt             | 115.7494    | 0.094021667 | 1231.092833 |
| 26 | O22 |       | HFA17794       | 2.867160667 | 0.035871333 | 79.9290241  |
| 26 | O23 |       | hpo            | 81.94214667 | 0.086947    | 942.4378836 |
| 26 | O24 |       | Luc            | 6.400246667 | 0.102803    | 62.25739197 |
| 26 | P01 | 18415 | CG3809         | 31.65957333 | 0.160263667 | 197.5467927 |
| 26 | P02 | 32051 | CG10741        | 32.64113667 | 0.162961    | 200.3002968 |
| 26 | P03 | 18407 | CG3966         | 34.06147    | 0.151692333 | 224.5431213 |
| 26 | P04 | 32106 | CG11626        | 29.52331667 | 0.14218     | 207.6474657 |
| 26 | P05 | 18411 | CG2934         | 20.28727    | 0.132032    | 153.6541899 |
| 26 | P06 | 32059 | CG10889        | 28.53607    | 0.151149    | 188.7943023 |
| 26 | P07 | 18413 | CG3752         | 30.27536667 | 0.142568    | 212.357378  |
| 26 | P08 | 32091 | CG11345        | 30.78176667 | 0.142239333 | 216.4082603 |
| 26 | P09 | 18416 | CG3845         | 34.47990667 | 0.201929667 | 170.7520605 |
| 26 | P10 | 32099 | CG11416        | 31.53456667 | 0.131905333 | 239.0696863 |
| 26 | P11 | 18406 | CG3909         | 16.49160667 | 0.099699667 | 165.4128566 |
| 26 | P12 | 32115 | CG11761        | 28.61271    | 0.129096667 | 221.6378683 |
| 26 | P13 | 18414 | CG3788         | 30.09544    | 0.130081    | 231.35923   |
| 26 | P14 | 32075 | CG11133        | 27.37653667 | 0.111623667 | 245.2574573 |
| 26 | P15 | 18388 | CG3707         | 29.9172     | 0.116305667 | 257.2290831 |
| 26 | P16 | 32083 | CG11238        | 33.62869333 | 0.126964333 | 264.8672462 |
| 26 | P17 | 31100 | CG14205        | 30.34825    | 0.114068667 | 266.0524655 |
| 26 | P18 | 32043 | CG10635        | 35.24049333 | 0.103734    | 339.7197961 |
| 26 | P19 | 31121 | CG13361        | 28.16828667 | 0.107614667 | 261.7513722 |
| 26 | P20 | 21796 | CG15185        | 33.50131    | 0.112521333 | 297.7329632 |
| 26 | P21 |       | wt             | 114.1923    | 0.083776667 | 1363.056141 |
| 26 | P22 |       | HFA17794       | 2.478751667 | 0.030584    | 81.04733412 |
| 26 | P23 |       | hpo            | 80.96788667 | 0.088124    | 918.7949556 |
| 26 | P24 |       | Luc            | 5.359271667 | 0.099511667 | 53.85571206 |
| 27 | A01 |       | DIAP1          | 0.929298    | 0.035186    | 26.41101574 |
| 27 | A02 |       | ex/ft          | 81.73727667 | 0.099598667 | 820.6663744 |
| 27 | A03 |       | Luc            | 4.704049    | 0.127193667 | 36.98335871 |
| 27 | A04 |       | hpo            | 74.71007333 | 0.104431667 | 715.3967347 |
| 27 | A05 | 30559 | CG7608         | 27.31603667 | 0.122847333 | 222.3575875 |

|    |     |       |                |             |             |             |
|----|-----|-------|----------------|-------------|-------------|-------------|
| 27 | A06 | 17021 | CG11381        | 27.75261333 | 0.123929333 | 223.939019  |
| 27 | A07 | 30551 | CG7861         | 28.25530667 | 0.132704    | 212.9197814 |
| 27 | A08 | 17019 | CG14339        | 27.4774     | 0.113073667 | 243.0044131 |
| 27 | A09 | 30557 | CG7514         | 30.48499333 | 0.124485667 | 244.8875774 |
| 27 | A10 | 17024 | CG8838         | 29.77851333 | 0.111007667 | 268.2563667 |
| 27 | A11 | 30560 | CG7707         | 31.84965    | 0.115260667 | 276.3271368 |
| 27 | A12 | 17025 | CG9015         | 26.65754667 | 0.117713333 | 226.4615733 |
| 27 | A13 | 30565 | CG7203         | 30.70621    | 0.114979667 | 267.0577406 |
| 27 | A14 | 17020 | CG10609        | 29.41095667 | 0.101010667 | 291.1668405 |
| 27 | A15 | 17652 | CG2038         | 16.66602333 | 0.093211    | 178.79889   |
| 27 | A16 | 29781 | CG31798        | 27.171      | 0.109036    | 249.1929271 |
| 27 | A17 | 17659 | CG31257        | 22.98809667 | 0.080346    | 286.1137663 |
| 27 | A18 | 29785 | CG31810        | 25.59371    | 0.103863    | 246.4179737 |
| 27 | A19 | 17650 | CG3124         | 25.48344333 | 0.098100667 | 259.7682992 |
| 27 | A20 | 29788 | CG31855        | 24.00898667 | 0.096852    | 247.8935558 |
| 27 | A21 | 17654 | CG14195        | 25.65666667 | 0.097046    | 264.3763439 |
| 27 | A22 | 29789 | CG31870        | 30.62548333 | 0.094793667 | 323.0752054 |
| 27 | A23 | 17663 | CG9884         | 34.66657333 | 0.086786    | 399.4489127 |
| 27 | A24 | 29799 | CG31839        | 33.78561    | 0.086299    | 391.494803  |
| 27 | B01 |       | DIAP1          | 0.955403667 | 0.034752667 | 27.49152103 |
| 27 | B02 |       | ex/ft          | 80.6845     | 0.132225    | 610.2060881 |
| 27 | B03 |       | Luc            | 4.774968667 | 0.142651333 | 33.47300411 |
| 27 | B04 |       | hpo            | 72.63194    | 0.111716333 | 650.1461141 |
| 27 | B05 | 29974 | CG32395        | 31.23332333 | 0.139841333 | 223.3482947 |
| 27 | B06 | 23954 | CG15405        | 28.53004333 | 0.114052667 | 250.1479726 |
| 27 | B07 | 30059 | CG32413        | 28.81494667 | 0.131901333 | 218.4583426 |
| 27 | B08 | 20129 | CG17323        | 30.99106667 | 0.149598    | 207.1623061 |
| 27 | B09 | 26070 | CG7092         | 29.15326    | 0.117051333 | 249.0638865 |
| 27 | B10 | 20122 | CG18445        | 27.75513667 | 0.106497333 | 260.6181375 |
| 27 | B11 | 26059 | CG5022         | 28.09173    | 0.115863    | 242.4564356 |
| 27 | B12 | 20127 | CG16928        | 25.05662333 | 0.117445333 | 213.3471175 |
| 27 | B13 | 26063 | CG6477         | 32.09230333 | 0.115832333 | 277.058248  |
| 27 | B14 | 20124 | CG6958         | 16.52595    | 0.123051    | 134.301631  |
| 27 | B15 | 26064 | CG5036         | 28.01695333 | 0.101407333 | 276.281334  |
| 27 | B16 | 20131 | CG17839        | 27.74134667 | 0.109957667 | 252.2911545 |
| 27 | B17 | 26069 | CG17484        | 31.68434    | 0.107509    | 294.7133728 |
| 27 | B18 | 20123 | CG6543         | 30.97773667 | 0.101695667 | 304.6121598 |
| 27 | B19 | 26068 | CG8590         | 30.13679    | 0.101623333 | 296.5538426 |
| 27 | B20 | 20132 | CG18041        | 38.32804333 | 0.117016333 | 327.5443884 |
| 27 | B21 | 26151 | CG8355         | 29.06732667 | 0.091918333 | 316.2299142 |
| 27 | B22 | 18326 | CG2855         | 26.97799    | 0.092760667 | 290.8343695 |
| 27 | B23 | 29594 | CG31389        | 25.897      | 0.112879333 | 229.4219786 |
| 27 | B24 | 18321 | CG2681         | 31.82809    | 0.090992667 | 349.7874188 |
| 27 | C01 | 21619 | CG8538         | 37.95811    | 0.129649    | 292.7759566 |
| 27 | C02 | 17023 | CG11210,CG8712 | 36.85792333 | 0.138342333 | 266.4254856 |
| 27 | C03 | 30562 | CG7820         | 35.93173    | 0.132485333 | 271.212889  |
| 27 | C04 | 17041 | CG10348        | 36.82356667 | 0.123279333 | 298.7002417 |
| 27 | C05 | 30571 | CG7611         | 32.1443     | 0.112113    | 286.7134052 |
| 27 | C06 | NA    | NA             | 31.59842333 | 0.124175333 | 254.4661849 |
| 27 | C07 | 30597 | CG7181         | 31.54063333 | 0.121875    | 258.7949402 |
| 27 | C08 | 17051 | CG10037        | 41.91965    | 0.106543333 | 393.4516472 |
| 27 | C09 | 30569 | CG7523         | 45.25502333 | 0.130255333 | 347.4331697 |
| 27 | C10 | 17036 | CG8840         | 39.70122667 | 0.104484333 | 379.9730103 |
| 27 | C11 | 30590 | CG7337         | 34.38910667 | 0.110432667 | 311.4033891 |

|    |     |       |                 |             |             |             |
|----|-----|-------|-----------------|-------------|-------------|-------------|
| 27 | C12 | 17037 | CG9034          | 35.52465333 | 0.112995667 | 314.3895194 |
| 27 | C13 | 30642 | CG7607          | 43.41657    | 0.104409333 | 415.8303536 |
| 27 | C14 | 17032 | CG10610         | 34.41720333 | 0.101861667 | 337.8818005 |
| 27 | C15 | 17667 | CG14259         | 35.99549    | 0.106698333 | 337.3575657 |
| 27 | C16 | 29793 | CG31800         | 36.85177333 | 0.089261333 | 412.8525976 |
| 27 | C17 | 17671 | CG14340         | 33.61950667 | 0.092452333 | 363.6415162 |
| 27 | C18 | 29797 | CG31813         | 33.22017    | 0.087415333 | 380.0268069 |
| 27 | C19 | 17649 | CG14154         | 37.11508333 | 0.087477333 | 424.2822903 |
| 27 | C20 | 29800 | CG31856         | 38.72482333 | 0.098278333 | 394.0321536 |
| 27 | C21 | 17666 | CG14233         | 44.62534333 | 0.119574333 | 373.2016904 |
| 27 | C22 | 29801 | CG31872         | 36.36778    | 0.09881     | 368.0576865 |
| 27 | C23 | 17675 | CG10492         | 29.76786667 | 0.094890333 | 313.7081051 |
| 27 | C24 | 29811 | CG31840         | 35.47079333 | 0.098293    | 360.8679492 |
| 27 | D01 | 29975 | CG32404         | 39.77876667 | 0.149444333 | 266.1778187 |
| 27 | D02 | 23972 | CG11870         | 25.44986667 | 0.118058667 | 215.5696603 |
| 27 | D03 | 29988 | CG32418         | 36.03413333 | 0.134960333 | 266.9979574 |
| 27 | D04 | 23969 | CG10572         | 8.509203333 | 0.103128667 | 82.51055316 |
| 27 | D05 | 29986 | CG32396         | 30.86208667 | 0.130745333 | 236.0473286 |
| 27 | D06 | 23966 | CG15528,CG7943  | 29.23294333 | 0.107193667 | 272.7114786 |
| 27 | D07 | 26073 | CG8312          | 29.31611333 | 0.130040667 | 225.4380425 |
| 27 | D08 | 20141 | CG17342         | 30.34910667 | 0.119675333 | 253.5953385 |
| 27 | D09 | 26091 | CG7051          | 37.37831667 | 0.122347    | 305.5106923 |
| 27 | D10 | 20134 | CG18497         | 21.64410667 | 0.120038333 | 180.3099565 |
| 27 | D11 | 26134 | CG15288         | 32.63999333 | 0.117088    | 278.7646329 |
| 27 | D12 | 20145 | CG7810          | 33.38662    | 0.116409    | 286.8044567 |
| 27 | D13 | 26075 | CG6509          | 26.24568333 | 0.111096    | 236.2432791 |
| 27 | D14 | 20136 | CG32344         | 26.60788667 | 0.140221667 | 189.7558865 |
| 27 | D15 | 26076 | CG5424          | 31.52285333 | 0.109026    | 289.1315221 |
| 27 | D16 | 20142 | CG40453         | 28.94424333 | 0.103326667 | 280.1236531 |
| 27 | D17 | 26081 | CG17566         | 32.29482667 | 0.080727333 | 400.0482282 |
| 27 | D18 | 20138 | CG15096         | 31.91298667 | 0.099432667 | 320.9507271 |
| 27 | D19 | 26072 | CG7321          | 32.04122    | 0.086452667 | 370.6215347 |
| 27 | D20 | 20144 | CG18130         | 30.24925667 | 0.092858    | 325.7582186 |
| 27 | D21 | 29601 | CG31351         | 32.29722    | 0.086637333 | 372.7864046 |
| 27 | D22 | 18325 | CG2767          | 36.18828333 | 0.090286    | 400.8183255 |
| 27 | D23 | 29606 | CG3139          | 36.89463667 | 0.083174333 | 443.5819944 |
| 27 | D24 | 18333 | CG2701          | 42.41815333 | 0.084851333 | 499.911453  |
| 27 | E01 | 30579 | CG7393          | 53.94378    | 0.101298667 | 532.5221128 |
| 27 | E02 | 17035 | CG8734          | 57.80373333 | 0.117697667 | 491.1204697 |
| 27 | E03 | 30574 | CG7838          | 40.4818     | 0.140447    | 288.2354198 |
| 27 | E04 | 17053 | CG10354         | 44.66091    | 0.104107667 | 428.9877146 |
| 27 | E05 | 30583 | CG7625          | 46.45832667 | 0.127294667 | 364.9667962 |
| 27 | E06 | 17045 | CG11411,CG14622 | 43.65349    | 0.128885667 | 338.6993382 |
| 27 | E07 | 30575 | CG7865          | 37.82034667 | 0.116913    | 323.4913711 |
| 27 | E08 | 17063 | CG10039         | 44.50112667 | 0.108967    | 408.3908584 |
| 27 | E09 | 30581 | CG7525          | 49.70891333 | 0.107698    | 461.55837   |
| 27 | E10 | 17048 | CG8854          | 36.68358667 | 0.105222667 | 348.628179  |
| 27 | E11 | 30584 | CG7736          | 41.96596    | 0.103645    | 404.90096   |
| 27 | E12 | 17049 | CG9040          | 45.37452333 | 0.099041667 | 458.1357005 |
| 27 | E13 | 30589 | CG7224          | 43.02956    | 0.09853     | 436.7153151 |
| 27 | E14 | 17044 | CG10612         | 40.91501    | 0.105876333 | 386.4415088 |
| 27 | E15 | 17676 | CG3127          | 43.67484333 | 0.097586333 | 447.5508182 |
| 27 | E16 | 29805 | CG31801         | 40.66410667 | 0.102591    | 396.3710917 |
| 27 | E17 | 17683 | CG14341         | 50.19148667 | 0.106960333 | 469.2532746 |

|    |     |       |                |             |             |             |
|----|-----|-------|----------------|-------------|-------------|-------------|
| 27 | E18 | 29809 | CG31815        | 37.79899667 | 0.088707333 | 426.1090402 |
| 27 | E19 | 17674 | CG5629         | 50.91174333 | 0.093053    | 547.1262972 |
| 27 | E20 | 29812 | CG31857        | 40.31187    | 0.086200667 | 467.6514876 |
| 27 | E21 | 17682 | CG14329        | 43.40995333 | 0.087526333 | 495.9644907 |
| 27 | E22 | 29813 | CG31874        | 37.87598    | 0.089733667 | 422.0933057 |
| 27 | E23 | 17687 | CG10531        | 41.75186667 | 0.086757667 | 481.2469983 |
| 27 | E24 | 29823 | CG31841        | 41.41825667 | 0.075578667 | 548.0151807 |
| 27 | F01 | 29987 | CG32405        | 45.60591    | 0.151984333 | 300.0698098 |
| 27 | F02 | 23984 | CG12015        | 40.76812667 | 0.125416667 | 325.0614751 |
| 27 | F03 | 30000 | CG32422        | 39.27561667 | 0.141131    | 278.2919179 |
| 27 | F04 | 23962 | CG12746        | 46.97521    | 0.143005667 | 328.4849551 |
| 27 | F05 | 30068 | CG32393        | 32.00498    | 0.137875667 | 232.1292856 |
| 27 | F06 | 23953 | CG14714        | 42.61791333 | 0.105200333 | 405.111961  |
| 27 | F07 | 26120 | CG30483        | 42.10187667 | 0.112934    | 372.8007214 |
| 27 | F08 | 20153 | CG17352        | 28.94728    | 0.106510333 | 271.7790762 |
| 27 | F09 | 26103 | CG7061         | 40.66266333 | 0.111829667 | 363.612488  |
| 27 | F10 | 20146 | CG18522        | 40.13558333 | 0.108961333 | 368.3470283 |
| 27 | F11 | 26083 | CG5341         | 33.07462667 | 0.112577    | 293.7955947 |
| 27 | F12 | 20151 | CG17005        | 33.38155667 | 0.09985     | 334.3170422 |
| 27 | F13 | 26086 | CG15148        | 40.7257     | 0.111767    | 364.3803627 |
| 27 | F14 | 20148 | CG7008         | 34.18025333 | 0.107698    | 317.3712913 |
| 27 | F15 | 26127 | CG7438         | 35.28025333 | 0.086638    | 407.2145402 |
| 27 | F16 | 20155 | CG40289        | 31.63084    | 0.100048667 | 316.1545381 |
| 27 | F17 | 26089 | CG7510         | 34.74059333 | 0.098520667 | 352.6223939 |
| 27 | F18 | 20210 | CG16912        | 40.19665333 | 0.106470667 | 377.5373499 |
| 27 | F19 | 26084 | CG7359         | 40.64583333 | 0.083427333 | 487.2004379 |
| 27 | F20 | 20176 | CG17273        | 25.74622667 | 0.093677667 | 274.8384709 |
| 27 | F21 | 29613 | CG31352        | 35.5071     | 0.088000667 | 403.486716  |
| 27 | F22 | 18337 | CG2789         | 34.78418    | 0.089209333 | 389.9163765 |
| 27 | F23 | 29617 | CG31373        | 37.80873    | 0.097703333 | 386.9748217 |
| 27 | F24 | 18345 | CG2702         | 44.62868    | 0.079005    | 564.8842478 |
| 27 | G01 | 30591 | CG7394         | 45.6468     | 0.127316333 | 358.5305892 |
| 27 | G02 | 17058 | CG11509        | 42.77179    | 0.108001333 | 396.0302033 |
| 27 | G03 | 30606 | CG7599         | 48.53217333 | 0.108782667 | 446.1388456 |
| 27 | G04 | 17065 | CG10377        | 38.59990667 | 0.122808    | 314.3110112 |
| 27 | G05 | 30595 | CG7632         | 50.51516333 | 0.120407    | 419.5367656 |
| 27 | G06 | 17057 | CG11413        | 41.07523333 | 0.099273    | 413.7603712 |
| 27 | G07 | 30587 | CG7881         | 49.18456667 | 0.106988333 | 459.7189725 |
| 27 | G08 | 17055 | CG14354        | 49.27270333 | 0.092797333 | 530.9711127 |
| 27 | G09 | 30621 | CG7187         | 25.02458667 | 0.104801333 | 238.781186  |
| 27 | G10 | 17060 | CG8859         | 40.05933    | 0.110259333 | 363.3191748 |
| 27 | G11 | 30596 | CG7738         | 39.35596333 | 0.091768    | 428.8636925 |
| 27 | G12 | 17061 | CG9050         | 39.70579333 | 0.104978333 | 378.2284598 |
| 27 | G13 | 30601 | CG7239         | 41.32791    | 0.090289333 | 457.7274909 |
| 27 | G14 | 29786 | CG31828        | 39.67393333 | 0.090813333 | 436.87344   |
| 27 | G15 | 17688 | CG3143         | 43.04288    | 0.104332667 | 412.5542016 |
| 27 | G16 | 29817 | CG31803        | 40.56995    | 0.091579    | 443.0049465 |
| 27 | G17 | 17689 | CG14186        | 42.22598    | 0.090867667 | 464.6975272 |
| 27 | G18 | 29821 | CG31816        | 39.97592333 | 0.087731    | 455.6647403 |
| 27 | G19 | 17686 | CG32351,CG6372 | 34.86232    | 0.081187667 | 429.4041377 |
| 27 | G20 | 29824 | CG31858        | 36.38318    | 0.092612667 | 392.8531734 |
| 27 | G21 | 17716 | CG14282        | 34.03406    | 0.085483333 | 398.1367908 |
| 27 | G22 | 29825 | CG31876        | 39.85873667 | 0.092362    | 431.5490858 |
| 27 | G23 | 17431 | CG13134        | 34.50583    | 0.079286667 | 435.203439  |

|    |     |       |         |             |             |             |
|----|-----|-------|---------|-------------|-------------|-------------|
| 27 | G24 | 29835 | CG31845 | 41.90611667 | 0.073649333 | 568.9951934 |
| 27 | H01 | 29999 | CG32407 | 48.48821333 | 0.130459    | 371.6739614 |
| 27 | H02 | 23996 | CG12066 | 36.59802667 | 0.131045333 | 279.2776037 |
| 27 | H03 | 30020 | CG32388 | 38.04177667 | 0.119305333 | 318.8606545 |
| 27 | H04 | 23982 | CG10951 | 35.00638333 | 0.129337667 | 270.6588439 |
| 27 | H05 | 30010 | CG32398 | 29.97233333 | 0.105761667 | 283.3950549 |
| 27 | H06 | 23961 | CG12151 | 29.09624333 | 0.114571333 | 253.9574472 |
| 27 | H07 | 26097 | CG8464  | 36.73584667 | 0.096996    | 378.7356867 |
| 27 | H08 | 20165 | CG17369 | 24.91396667 | 0.088593667 | 281.216114  |
| 27 | H09 | 26106 | CG7112  | 32.10818    | 0.100619    | 319.1065306 |
| 27 | H10 | 20158 | CG18550 | 37.26105667 | 0.103284    | 360.7631063 |
| 27 | H11 | 26095 | CG5407  | 37.09893    | 0.098609    | 376.2225558 |
| 27 | H12 | 20169 | CG7840  | 33.40878    | 0.105783333 | 315.8227194 |
| 27 | H13 | 26098 | CG31802 | 42.42426    | 0.095377667 | 444.8028714 |
| 27 | H14 | 20160 | CG7035  | 31.21446667 | 0.09091     | 343.3556998 |
| 27 | H15 | 26100 | CG6450  | 36.67356    | 0.093171667 | 393.6127936 |
| 27 | H16 | 20166 | CG17739 | 30.42667667 | 0.081848667 | 371.743095  |
| 27 | H17 | 26105 | CG17947 | 31.46182667 | 0.084447667 | 372.5600471 |
| 27 | H18 | 20159 | CG6904  | 35.47933333 | 0.075784    | 468.1639044 |
| 27 | H19 | 26104 | CG15010 | 22.97443333 | 0.077306    | 297.1882303 |
| 27 | H20 | 20168 | CG18251 | 48.07       | 0.080597    | 596.4241845 |
| 27 | H21 | 29625 | CG31353 | 35.60142333 | 0.084260333 | 422.5170009 |
| 27 | H22 | 18397 | CG2846  | 36.68439333 | 0.083435    | 439.6763149 |
| 27 | H23 | 29677 | CG31388 | 40.26695    | 0.081851333 | 491.9522793 |
| 27 | H24 | 18405 | CG2759  | 30.23989333 | 0.072926    | 414.66546   |
| 27 | I01 | 30603 | CG7421  | 37.78247    | 0.135784333 | 278.2535295 |
| 27 | I02 | 17059 | CG8749  | 51.05117    | 0.177433    | 287.7208298 |
| 27 | I03 | 30598 | CG7843  | 17.15986333 | 0.130573667 | 131.4190202 |
| 27 | I04 | 17090 | CG10588 | 36.7135     | 0.113572333 | 323.2609468 |
| 27 | I05 | 30607 | CG7637  | 28.44169667 | 0.112754333 | 252.2448213 |
| 27 | I06 | 17069 | CG11449 | 29.06054667 | 0.120749333 | 240.6683819 |
| 27 | I07 | 30599 | CG7882  | 35.14272333 | 0.120247667 | 292.2528504 |
| 27 | I08 | 17067 | CG14355 | 34.59960333 | 0.101482667 | 340.9410146 |
| 27 | I09 | 30605 | CG7549  | 36.50381667 | 0.115418    | 316.2749022 |
| 27 | I10 | 17100 | CG10210 | 32.52483667 | 0.100723    | 322.9137006 |
| 27 | I11 | 30626 | CG7370  | 31.70764333 | 0.109932333 | 288.4287304 |
| 27 | I12 | 17030 | CG10570 | 32.17969667 | 0.109828667 | 292.9990652 |
| 27 | I13 | 30613 | CG7241  | 35.09153667 | 0.101321333 | 346.339073  |
| 27 | I14 | 29798 | CG31829 | 35.94091667 | 0.097199333 | 369.7650533 |
| 27 | I15 | 17700 | CG3195  | 10.48978    | 0.129958    | 80.71669309 |
| 27 | I16 | 29829 | CG31804 | 31.80897    | 0.100805667 | 315.5474395 |
| 27 | I17 | 17701 | CG14187 | 36.47431    | 0.098707    | 369.5210066 |
| 27 | I18 | 29833 | CG31819 | 35.83532    | 0.093584667 | 382.9187118 |
| 27 | I19 | 17685 | CG14160 | 31.95567    | 0.091114667 | 350.7192768 |
| 27 | I20 | 29836 | CG31859 | 30.00817333 | 0.086932    | 345.1913373 |
| 27 | I21 | 17723 | CG1391  | 25.44841667 | 0.108376    | 234.8159802 |
| 27 | I22 | 29837 | CG31878 | 28.91651667 | 0.077293333 | 374.1139814 |
| 27 | I23 | 17443 | CG13135 | 32.06306    | 0.084295    | 380.3672816 |
| 27 | I24 | 29847 | CG31848 | 36.11741667 | 0.089331333 | 404.308492  |
| 27 | J01 | 30011 | CG32408 | 27.72009667 | 0.137631333 | 201.4083276 |
| 27 | J02 | 23991 | CG17178 | 30.22715667 | 0.130765    | 231.1563237 |
| 27 | J03 | 30032 | CG32389 | 25.59186667 | 0.109758667 | 233.164883  |
| 27 | J04 | 24005 | CG10738 | 28.84041    | 0.131412    | 219.4655739 |
| 27 | J05 | 30022 | CG32399 | 25.75973333 | 0.123312667 | 208.8977072 |

|    |     |       |                 |             |             |             |
|----|-----|-------|-----------------|-------------|-------------|-------------|
| 27 | J06 | 20161 | CG8006          | 29.96138333 | 0.108593    | 275.9052916 |
| 27 | J07 | 26109 | CG8479          | 33.20209667 | 0.121454    | 273.3717841 |
| 27 | J08 | 20177 | CG17437         | 18.1631     | 0.152074    | 119.4359325 |
| 27 | J09 | 26118 | CG7127          | 29.66177667 | 0.119751333 | 247.6947508 |
| 27 | J10 | 20170 | CG18585         | 35.08885667 | 0.109459333 | 320.5652328 |
| 27 | J11 | 26107 | CG5409          | 41.90904333 | 0.104059    | 402.7430913 |
| 27 | J12 | 20175 | CG17033         | 34.46419333 | 0.102289333 | 336.9285165 |
| 27 | J13 | 26110 | CG15171         | 30.00830333 | 0.095082    | 315.6044607 |
| 27 | J14 | 20128 | CG17119         | 27.08804333 | 0.090894667 | 298.0157618 |
| 27 | J15 | 26112 | CG6619          | 33.18834667 | 0.102743    | 323.0229472 |
| 27 | J16 | 20178 | CG17754         | 32.83278333 | 0.087325667 | 375.9809067 |
| 27 | J17 | 26113 | CG7662          | 28.68370667 | 0.087859333 | 326.4730744 |
| 27 | J18 | 20171 | CG6905          | 27.85748    | 0.227327333 | 122.5434689 |
| 27 | J19 | 26108 | CG7435,CG9601   | 29.14650333 | 0.093207    | 312.7072359 |
| 27 | J20 | 20200 | CG17292         | 25.62512667 | 0.093905667 | 272.8815797 |
| 27 | J21 | 29637 | CG31355         | 30.18699333 | 0.090398667 | 333.9318427 |
| 27 | J22 | 18409 | CG2848          | 17.67225    | 0.083981    | 210.4315262 |
| 27 | J23 | 29641 | CG31381         | 26.33976    | 0.078796667 | 334.2750539 |
| 27 | J24 | 18369 | CG2714          | 37.47221667 | 0.097999    | 382.3734596 |
| 27 | K02 | 17082 | CG11555,CG11604 | 36.10300333 | 0.153850333 | 234.6631467 |
| 27 | K03 | 30610 | CG7845          | 28.83986667 | 0.136683333 | 210.9976832 |
| 27 | K04 | 17089 | CG10496         | 29.60371333 | 0.14044     | 210.7926042 |
| 27 | K05 | 30619 | CG7642          | 33.03793667 | 0.120984333 | 273.0761559 |
| 27 | K06 | 17050 | CG9200          | 32.12862    | 0.122211667 | 262.8932317 |
| 27 | K07 | 30611 | CG7897          | 32.47569    | 0.116530333 | 278.6887248 |
| 27 | K08 | 17079 | CG14362         | 34.42213    | 0.114707333 | 300.0865681 |
| 27 | K09 | 30617 | CG7552          | 35.9858     | 0.119374    | 301.454253  |
| 27 | K1  | 30561 | CG7146          | 38.78942    | 0.11897     | 326.0437085 |
| 27 | K10 | 17111 | CG10151         | 31.31187    | 0.11726     | 267.0294218 |
| 27 | K11 | 30638 | CG7371          | 26.53202667 | 0.096540667 | 274.8274648 |
| 27 | K12 | 17085 | CG9097          | 29.73789333 | 0.102821333 | 289.2190985 |
| 27 | K13 | 30604 | CG7462          | 28.56118    | 0.103312333 | 276.4546989 |
| 27 | K14 | 29810 | CG3183          | 3.492217333 | 0.048289    | 72.31910649 |
| 27 | K15 | 17712 | CG3500          | 29.08614667 | 0.095046333 | 306.0207127 |
| 27 | K16 | 29841 | CG31805         | 28.82075    | 0.100342    | 287.2251899 |
| 27 | K17 | 17713 | CG14190         | 30.43549    | 0.101213    | 300.7073202 |
| 27 | K18 | 29845 | CG31822         | 31.63369    | 0.096664    | 327.2540967 |
| 27 | K19 | 17710 | CG7777          | 26.45255    | 0.085192333 | 310.5038795 |
| 27 | K20 | 29848 | CG31861         | 30.33953667 | 0.091314    | 332.2550394 |
| 27 | K21 | 17714 | CG14247         | 28.24656    | 0.095274333 | 296.4760709 |
| 27 | K22 | 29849 | CG4619          | 30.05033333 | 0.098457    | 305.2127663 |
| 27 | K23 | 17455 | CG13136         | 30.82504333 | 0.086052    | 358.2141418 |
| 27 | K24 | 29859 | CG31849         | 28.37035333 | 0.087196    | 325.3630136 |
| 27 | L01 | 30023 | CG32409         | 36.50751    | 0.188972333 | 193.1897085 |
| 27 | L02 | 24003 | CG17216         | 28.77206667 | 0.132066333 | 217.8607215 |
| 27 | L03 | 30036 | CG32431         | 32.50982    | 0.129775667 | 250.507825  |
| 27 | L04 | 24006 | CG10967         | 23.1794     | 0.122353    | 189.4469282 |
| 27 | L05 | 30034 | CG32401         | 32.10618    | 0.11295     | 284.2512616 |
| 27 | L06 | 20202 | CG18476         | 28.25641    | 0.116380333 | 242.7936851 |
| 27 | L07 | 26121 | CG8529          | 30.16567333 | 0.121214333 | 248.8622633 |
| 27 | L08 | 20189 | CG31678         | 29.02743333 | 0.103456    | 280.5775724 |
| 27 | L09 | 26130 | CG7186          | 26.38584333 | 0.130575    | 202.0742358 |
| 27 | L10 | 20209 | CG15009         | 25.51694    | 0.100817    | 253.1015603 |
| 27 | L11 | 26090 | CG32180         | 31.00389    | 0.114859667 | 269.9284344 |

|    |     |       |                |             |             |             |
|----|-----|-------|----------------|-------------|-------------|-------------|
| 27 | L12 | 20187 | CG17034        | 29.47875    | 0.108263    | 272.2883164 |
| 27 | L13 | 26123 | CG3985         | 29.98778    | 0.103001667 | 291.1387842 |
| 27 | L14 | 20184 | CG7070         | 29.02813333 | 0.103573333 | 280.2664779 |
| 27 | L15 | 26126 | CG16932        | 26.92581    | 0.093117667 | 289.1589852 |
| 27 | L16 | 20191 | CG17922        | 30.30281    | 0.099105    | 305.764694  |
| 27 | L17 | 26149 | CG7788         | 38.64760333 | 0.185849    | 207.9516346 |
| 27 | L18 | 20183 | CG6906         | 28.43790333 | 0.082474    | 344.8105261 |
| 27 | L19 | 26128 | CG33146        | 32.69107667 | 0.094858333 | 344.6305192 |
| 27 | L20 | 20192 | CG18362        | 18.18134    | 0.092794667 | 195.9308725 |
| 27 | L21 | 29649 | CG3136         | 29.01562333 | 0.087933667 | 329.9717211 |
| 27 | L22 | 18373 | CG2827         | 25.99777667 | 0.098147    | 264.8861062 |
| 27 | L23 | 29653 | CG31385        | 25.21476    | 0.080784    | 312.1256684 |
| 27 | L24 | 18381 | CG32795        | 34.34998667 | 0.083621333 | 410.7801837 |
| 27 | M01 | 30627 | CG7435         | 39.02591333 | 0.149915667 | 260.3191127 |
| 27 | M02 | 17083 | CG8784         | 33.15568667 | 0.140076667 | 236.6967137 |
| 27 | M03 | 30622 | CG7849         | 34.96659    | 0.130463333 | 268.0185237 |
| 27 | M04 | 17074 | CG9211         | 37.98562    | 0.120794667 | 314.4643803 |
| 27 | M05 | 30631 | CG7646         | 31.39703333 | 0.114881    | 273.3004878 |
| 27 | M06 | 17062 | CG9207         | 38.75918    | 0.122428667 | 316.5858214 |
| 27 | M07 | 30588 | CG7972         | 30.77371333 | 0.107089667 | 287.3639847 |
| 27 | M08 | 17091 | CG14367,CG9351 | 24.62484333 | 0.112783667 | 218.3369637 |
| 27 | M09 | 30629 | CG7554         | 29.9866     | 0.106763    | 280.8707136 |
| 27 | M10 | 17096 | CG8960         | 33.04334    | 0.107584333 | 307.1389577 |
| 27 | M11 | 30632 | CG7791         | 32.98693    | 0.108599667 | 303.7479857 |
| 27 | M12 | 17097 | CG9138         | 30.51123333 | 0.107042    | 285.0398286 |
| 27 | M13 | 30616 | CG7471         | 8.897705333 | 0.109409    | 81.32516825 |
| 27 | M14 | 29822 | CG31830        | 28.9054     | 0.104685667 | 276.116119  |
| 27 | M15 | 17724 | CG3918         | 21.22076333 | 0.093106667 | 227.9188386 |
| 27 | M16 | 29853 | CG31806        | 28.54904333 | 0.092732667 | 307.8639314 |
| 27 | M17 | 17711 | CG1319         | 34.79359667 | 0.096775    | 359.5308361 |
| 27 | M18 | 29857 | CG31823        | 27.35892333 | 0.094596333 | 289.2175877 |
| 27 | M19 | 17722 | CG7958         | 11.79691267 | 0.096616333 | 122.1006041 |
| 27 | M20 | 29860 | CG31862        | 29.72728333 | 0.089551667 | 331.9567847 |
| 27 | M21 | 17735 | CG1438         | 28.51031667 | 0.083437    | 341.6987268 |
| 27 | M22 | 29858 | CG31834        | 28.42654667 | 0.089096333 | 319.0540576 |
| 27 | M23 | 17475 | CG13120        | 28.16159    | 0.077835333 | 361.8098464 |
| 27 | M24 | 29870 | CG31835        | 37.36409    | 0.088295667 | 423.1701443 |
| 27 | N01 | 30044 | CG32390        | 31.77353    | 0.162076667 | 196.040125  |
| 27 | N02 | 24004 | CG10538        | 34.30810333 | 0.128344    | 267.3136519 |
| 27 | N03 | 30056 | CG32391        | 30.78409    | 0.136577333 | 225.3967715 |
| 27 | N04 | 24028 | CG10545        | 27.40648    | 0.135485667 | 202.2832428 |
| 27 | N05 | 30046 | CG32402        | 27.69113667 | 0.126954667 | 218.1183047 |
| 27 | N06 | 20185 | CG14994        | 27.98108333 | 0.133299667 | 209.9111276 |
| 27 | N07 | 26133 | CG8532         | 33.89119667 | 0.087687667 | 386.4990135 |
| 27 | N08 | 20201 | CG17492        | 29.13682667 | 0.105715    | 275.6167684 |
| 27 | N09 | 26142 | CG7210         | 29.65815333 | 0.130018333 | 228.107472  |
| 27 | N10 | 20194 | CG10712        | 70.83382667 | 0.103558333 | 683.9992919 |
| 27 | N11 | 26102 | CG7729         | 31.69883667 | 0.104001667 | 304.7916219 |
| 27 | N12 | 20199 | CG17054        | 35.34962667 | 0.157854    | 223.9387451 |
| 27 | N13 | 26135 | CG4040         | 29.17330667 | 0.104778667 | 278.4279243 |
| 27 | N14 | 20196 | CG7074         | 21.53807333 | 0.095370333 | 225.8361964 |
| 27 | N15 | 26136 | CG6757         | 19.06582    | 0.101666333 | 187.5332706 |
| 27 | N16 | 20203 | CG31739        | 25.12084667 | 0.088113333 | 285.0969963 |
| 27 | N17 | 26137 | CG7749         | 32.11492333 | 0.103969    | 308.8894125 |

|    |     |       |          |             |             |             |
|----|-----|-------|----------|-------------|-------------|-------------|
| 27 | N18 | 20198 | CG33115  | 27.90696333 | 0.089155667 | 313.0139045 |
| 27 | N19 | 26138 | CG17046  | 26.12173667 | 0.089538333 | 291.7380265 |
| 27 | N20 | 20204 | CG18374  | 23.44743667 | 0.083136667 | 282.0348422 |
| 27 | N21 | 29661 | CG31360  | 30.22511    | 0.084582667 | 357.3440185 |
| 27 | N22 | 18385 | CG2843   | 24.03061333 | 0.093919333 | 255.8643943 |
| 27 | N23 | 29665 | CG31386  | 23.89522667 | 0.079180333 | 301.7823449 |
| 27 | N24 | 18393 | CG2746   | 4.384168    | 0.079891    | 54.87686974 |
| 27 | O01 | 30639 | CG7441   | 38.44534333 | 0.154585    | 248.7003482 |
| 27 | O02 | 17095 | CG8813   | 37.22784333 | 0.152954333 | 243.3918839 |
| 27 | O03 | 30634 | CG7856   | 34.58404333 | 0.139919    | 247.1718875 |
| 27 | O04 | 17113 | CG10559  | 27.98188333 | 0.137018    | 204.2204917 |
| 27 | O05 | 30643 | CG7676   | 30.03296333 | 0.137590667 | 218.2776206 |
| 27 | O06 | 17105 | CG11470  | 34.78126    | 0.129377333 | 268.8358084 |
| 27 | O07 | 30600 | CG7973   | 33.24720667 | 0.134129333 | 247.8742408 |
| 27 | O08 | 17107 | CG8829   | 35.32753667 | 0.123073333 | 287.0446076 |
| 27 | O09 | 30640 | CG7499   | 32.39338    | 0.126305667 | 256.4681447 |
| 27 | O10 | 17108 | CG8991   | 28.78670667 | 0.117213333 | 245.5924241 |
| 27 | O11 | 30644 | CG7796   | 31.09768667 | 0.110420667 | 281.629224  |
| 27 | O12 | 17066 | CG10586  | 37.83349333 | 0.127968667 | 295.6465385 |
| 27 | O13 | 30628 | CG7478   | 28.96989667 | 0.104754333 | 276.5508189 |
| 27 | O14 | 29834 | CG31832  | 30.97798667 | 0.099949    | 309.937935  |
| 27 | O15 | 17736 | CG3948   | 5.812437333 | 0.156689    | 37.09537577 |
| 27 | O16 | 29865 | CG31807  | 32.31858333 | 0.105114333 | 307.4612406 |
| 27 | O17 | 17737 | CG14193  | 35.92899    | 0.119916    | 299.6179826 |
| 27 | O18 | 29869 | CG31824  | 30.37250667 | 0.103002333 | 294.8720256 |
| 27 | O19 | 17734 | CG9057   | 32.03664667 | 0.098879333 | 323.9973975 |
| 27 | O20 | 29872 | CG31867  | 31.93641    | 0.097025333 | 329.1553752 |
| 27 | O21 |       | wt       | 115.78639   | 0.078009    | 1484.269636 |
| 27 | O22 |       | HFA17794 | 2.964247333 | 0.034987333 | 84.72344277 |
| 27 | O23 |       | hpo      | 77.84539667 | 0.082362333 | 945.157738  |
| 27 | O24 |       | Luc      | 6.071712333 | 0.094089    | 64.53158534 |
| 27 | P01 | 30047 | CG10529  | 32.60857667 | 0.158675667 | 205.5045827 |
| 27 | P02 | 23985 | CG12169  | 33.30927667 | 0.155621    | 214.0410142 |
| 27 | P03 | 30060 | CG32441  | 33.56550333 | 0.16943     | 198.108383  |
| 27 | P04 | 24009 | CG12241  | 27.79750333 | 0.151594333 | 183.367694  |
| 27 | P05 | 30058 | CG32403  | 28.91605    | 0.135765333 | 212.9855191 |
| 27 | P06 | 20197 | CG14998  | 28.95508    | 0.141539333 | 204.5726747 |
| 27 | P07 | 26115 | CG7238   | 29.96143667 | 0.165242667 | 181.3177993 |
| 27 | P08 | 20213 | CG17509  | 31.06431667 | 0.168431333 | 184.4331221 |
| 27 | P09 | 26114 | CG16903  | 34.23386667 | 0.178138333 | 192.1757436 |
| 27 | P10 | 20206 | CG18076  | 31.62341667 | 0.117567333 | 268.9813213 |
| 27 | P11 | 26143 | CG5582   | 30.11571667 | 0.108321667 | 278.0211715 |
| 27 | P12 | 20211 | CG17081  | 27.90818667 | 0.121701667 | 229.3163884 |
| 27 | P13 | 26147 | CG5014   | 27.52388    | 0.104789667 | 262.658341  |
| 27 | P14 | 20208 | CG7082   | 28.16252667 | 0.107324    | 262.4066068 |
| 27 | P15 | 26139 | CG8269   | 37.15650667 | 0.124079667 | 299.4568543 |
| 27 | P16 | 20215 | CG17975  | 27.30037667 | 0.111492333 | 244.8632641 |
| 27 | P17 | 26153 | CG7057   | 32.68436333 | 0.083207667 | 392.8047095 |
| 27 | P18 | 20207 | CG6957   | 29.47062667 | 0.113600667 | 259.4230081 |
| 27 | P19 | 26152 | CG17051  | 27.80370667 | 0.095631667 | 290.7374475 |
| 27 | P20 | 20214 | CG17838  | 26.12053667 | 0.092441667 | 282.5623727 |
| 27 | P21 |       | wt       | 99.76595    | 0.087969    | 1134.103491 |
| 27 | P22 |       | HFA17794 | 2.212953333 | 0.031965333 | 69.22979061 |
| 27 | P23 |       | hpo      | 70.80443333 | 0.084373667 | 839.1769154 |



|    |     |       |         |             |             |             |
|----|-----|-------|---------|-------------|-------------|-------------|
| 27 | P24 |       | Luc     | 4.463554667 | 0.098502667 | 45.31404903 |
| 28 | A01 |       | DIAP1   | 1.015800333 | 0.034053333 | 29.82968872 |
| 28 | A02 |       | ex/ft   | 76.27326333 | 0.111858333 | 681.8737689 |
| 28 | A03 |       | Luc     | 4.989873333 | 0.130409333 | 38.26316112 |
| 28 | A04 |       | hpo     | 73.00416667 | 0.112960667 | 646.2795309 |
| 28 | A05 | 29783 | CG31956 | 32.38398333 | 0.135353333 | 239.2551593 |
| 28 | A06 | 33165 | CG18545 | 31.31601333 | 0.120281667 | 260.3556652 |
| 28 | A07 | 29790 | CG31882 | 31.83999    | 0.126812333 | 251.0796006 |
| 28 | A08 | 33173 | CG1981  | 44.40123667 | 0.117649333 | 377.4032152 |
| 28 | A09 | 29782 | CG31938 | 21.14638    | 0.126414    | 167.2787824 |
| 28 | A10 | 33181 | CG2331  | 11.04654667 | 0.123910667 | 89.14927959 |
| 28 | A11 | 29981 | CG32307 | 31.13141    | 0.115052    | 270.5855613 |
| 28 | A12 | 33205 | CG31363 | 29.17369667 | 0.10574     | 275.90029   |
| 28 | A13 | 29982 | CG32331 | 26.61821333 | 0.111147667 | 239.4851294 |
| 28 | A14 | 33221 | CG32237 | 29.85930667 | 0.113942    | 262.05707   |
| 28 | A15 | 29983 | CG32351 | 25.59517333 | 0.106653667 | 239.983998  |
| 28 | A16 | 33229 | CG32544 | 25.89254    | 0.100916    | 256.5751714 |
| 28 | A17 | 29977 | CG32235 | 27.46802    | 0.113788333 | 241.3957494 |
| 28 | A18 | 33237 | CG32586 | 27.42732    | 0.194374    | 141.1059092 |
| 28 | A19 | 29979 | CG32265 | 29.24835    | 0.098275    | 297.6174002 |
| 28 | A20 | 33189 | CG30180 | 28.37430333 | 0.099097667 | 286.3266542 |
| 28 | A21 | 29990 | CG32252 | 28.46516    | 0.097669333 | 291.4441927 |
| 28 | A22 | 33245 | CG3277  | 27.61882667 | 0.085218667 | 324.0936258 |
| 28 | A23 | 29985 | CG32225 | 30.01217333 | 0.098428333 | 304.9139645 |
| 28 | A24 | 33213 | CG31950 | 30.94869667 | 0.088671    | 349.0283933 |
| 28 | B01 |       | DIAP1   | 1.240605    | 0.034063667 | 36.42018377 |
| 28 | B02 |       | ex/ft   | 91.02750333 | 0.136745667 | 665.6701126 |
| 28 | B03 |       | Luc     | 5.080186667 | 0.156674333 | 32.42513664 |
| 28 | B04 |       | hpo     | 76.68526667 | 0.147908333 | 518.4648149 |
| 28 | B05 | 33357 | CG5577  | 33.17270333 | 0.143140667 | 231.7489789 |
| 28 | B06 | 32877 | CG10035 | 26.83326667 | 0.153282333 | 175.057791  |
| 28 | B07 | 33365 | CG5837  | 14.72663    | 0.135364667 | 108.7922747 |
| 28 | B08 | 32885 | CG10177 | 26.63748667 | 0.134382667 | 198.2211496 |
| 28 | B09 | 33373 | CG6371  | 15.60406    | 0.107502667 | 145.1504459 |
| 28 | B10 | 32893 | CG10671 | 27.46943667 | 0.232281    | 118.2595075 |
| 28 | B11 | 33381 | CG6438  | 27.78390667 | 0.119166667 | 233.1516643 |
| 28 | B12 | 32901 | CG10946 | 30.17723    | 0.117944667 | 255.8592165 |
| 28 | B13 | 33405 | CG7281  | 33.00673    | 0.105043667 | 314.2191343 |
| 28 | B14 | 32909 | CG11142 | 26.62840667 | 0.108491    | 245.4434623 |
| 28 | B15 | 33413 | CG7490  | 5.528915    | 0.174185    | 31.74162528 |
| 28 | B16 | 32925 | CG11975 | 25.72350667 | 0.107260667 | 239.8223642 |
| 28 | B17 | 33429 | CG7892  | 33.08110333 | 0.091327    | 362.2269792 |
| 28 | B18 | 32941 | CG12442 | 27.58445667 | 0.099928333 | 276.0423971 |
| 28 | B19 | 33397 | CG6971  | 30.69653    | 0.105737    | 290.3102036 |
| 28 | B20 | 32933 | CG12249 | 25.66960333 | 0.100142333 | 256.3311886 |
| 28 | B21 | 33437 | CG8160  | 28.71754333 | 0.085917    | 334.2475102 |
| 28 | B22 | 32957 | CG12971 | 28.11745    | 0.100323667 | 280.267368  |
| 28 | B23 | 33390 | CG6702  | 26.03191333 | 0.097944333 | 265.7827405 |
| 28 | B24 | 32917 | CG11379 | 33.51251    | 0.082239667 | 407.4981254 |
| 28 | C01 | 29796 | CG31988 | 33.25190667 | 0.120790667 | 275.2853973 |
| 28 | C02 | 17565 | CG13924 | 32.71676667 | 0.107266    | 305.0059354 |
| 28 | C03 | 29792 | CG31921 | 39.06478667 | 0.12023     | 324.9171311 |
| 28 | C04 | 17558 | CG13962 | 32.44700333 | 0.113038333 | 287.0442475 |
| 28 | C05 | 29795 | CG31957 | 27.55314333 | 0.117131333 | 235.232901  |

|    |     |       |         |             |             |             |
|----|-----|-------|---------|-------------|-------------|-------------|
| 28 | C06 | 33166 | CG18577 | 37.20276333 | 0.120849    | 307.8450242 |
| 28 | C07 | 29802 | CG31887 | 37.24399667 | 0.106355    | 350.1856675 |
| 28 | C08 | 33174 | CG2028  | 16.69963    | 0.160920667 | 103.7755457 |
| 28 | C09 | 29876 | CG31934 | 38.05246667 | 0.100922667 | 377.0457908 |
| 28 | C10 | 33182 | CG2508  | 43.22076667 | 0.128684333 | 335.8665779 |
| 28 | C11 | 29993 | CG32308 | 35.02828667 | 0.108053667 | 324.1749007 |
| 28 | C12 | 33206 | CG31364 | 39.75602    | 0.099668    | 398.8844965 |
| 28 | C13 | 29994 | CG32334 | 40.57382333 | 0.108536333 | 373.8271055 |
| 28 | C14 | 33222 | CG32261 | 41.29852333 | 0.100117333 | 412.5012319 |
| 28 | C15 | 30040 | CG32299 | 33.17976    | 0.098960333 | 335.2834301 |
| 28 | C16 | 33230 | CG32550 | 34.17951    | 0.094356667 | 362.2373618 |
| 28 | C17 | 29989 | CG32236 | 37.34194333 | 0.099390667 | 375.708752  |
| 28 | C18 | 33238 | CG32588 | 28.73469    | 0.094907333 | 302.7657505 |
| 28 | C19 | 29991 | CG32266 | 37.64328    | 0.09164     | 410.7734614 |
| 28 | C20 | 33190 | CG30184 | 33.56055667 | 0.090898667 | 369.2084592 |
| 28 | C21 | 30002 | CG32254 | 36.10729333 | 0.092042333 | 392.2900694 |
| 28 | C22 | 33246 | CG32838 | 33.75390667 | 0.080797    | 417.7618806 |
| 28 | C23 | 29997 | CG32228 | 36.70897333 | 0.094215333 | 389.6284398 |
| 28 | C24 | 33214 | CG3203  | 5.892902667 | 0.110597667 | 53.2823417  |
| 28 | D01 | 33253 | CG3431  | 38.96859    | 0.141447333 | 275.4989372 |
| 28 | D02 | 33445 | CG8311  | 33.33953    | 0.11869     | 280.8958632 |
| 28 | D03 | 33250 | CG33114 | 28.75651333 | 0.13893     | 206.9856283 |
| 28 | D04 | 33442 | CG8224  | 32.91837667 | 0.123100333 | 267.4109466 |
| 28 | D05 | 33358 | CG5687  | 31.65804667 | 0.140764333 | 224.9010521 |
| 28 | D06 | 32878 | CG10043 | 36.74640667 | 0.108238667 | 339.4942658 |
| 28 | D07 | 33366 | CG5958  | 29.84411667 | 0.119989333 | 248.7230809 |
| 28 | D08 | 32886 | CG10317 | 30.26813333 | 0.123601333 | 244.8851684 |
| 28 | D09 | 33374 | CG6378  | 34.10528333 | 0.109495333 | 311.4770493 |
| 28 | D10 | 32894 | CG10674 | 26.59584333 | 0.111079    | 239.4317858 |
| 28 | D11 | 33382 | CG6544  | 32.90762667 | 0.114026667 | 288.595884  |
| 28 | D12 | 32902 | CG10953 | 30.20141333 | 0.102054333 | 295.9346492 |
| 28 | D13 | 33406 | CG7325  | 37.33063    | 0.121444    | 307.3896611 |
| 28 | D14 | 32910 | CG11147 | 34.23867333 | 0.098059667 | 349.1616329 |
| 28 | D15 | 33414 | CG7507  | 33.96171    | 0.104875333 | 323.8293402 |
| 28 | D16 | 32926 | CG12085 | 39.57021333 | 0.122267333 | 323.6368395 |
| 28 | D17 | 33430 | CG7916  | 35.62456333 | 0.108871    | 327.2181144 |
| 28 | D18 | 32942 | CG12511 | 29.73552333 | 0.084845333 | 350.4673995 |
| 28 | D19 | 33398 | CG6977  | 30.66259667 | 0.087862    | 348.9858718 |
| 28 | D20 | 32934 | CG12255 | 32.30253333 | 0.089837    | 359.5682551 |
| 28 | D21 | 33438 | CG8167  | 33.46636333 | 0.084325333 | 396.8719958 |
| 28 | D22 | 32958 | CG12972 | 107.6119367 | 0.088112    | 1221.308524 |
| 28 | D23 | 33391 | CG6717  | 42.59675667 | 0.093210333 | 456.996077  |
| 28 | D24 | 32918 | CG11426 | 31.57714333 | 0.080136    | 394.0444162 |
| 28 | E01 | 29808 | CG31990 | 48.49412333 | 0.116176667 | 417.417066  |
| 28 | E02 | 17559 | CG13976 | 39.74282    | 0.115542667 | 343.9666155 |
| 28 | E03 | 29804 | CG31922 | 40.26837667 | 0.119254    | 337.6689811 |
| 28 | E04 | 17586 | CG14054 | 42.10131667 | 0.114982333 | 366.1546556 |
| 28 | E05 | 29807 | CG31959 | 39.17837667 | 0.130047    | 301.26321   |
| 28 | E06 | 33167 | CG18625 | 39.67811667 | 0.111656667 | 355.358241  |
| 28 | E07 | 29814 | CG3189  | 36.66105333 | 0.109280667 | 335.4761135 |
| 28 | E08 | 33175 | CG2061  | 39.68891667 | 0.120221333 | 330.132062  |
| 28 | E09 | 29806 | CG31941 | 41.06846    | 0.105570333 | 389.0151589 |
| 28 | E10 | 33183 | CG2706  | 46.98416333 | 0.115763667 | 405.8627779 |
| 28 | E11 | 30005 | CG32309 | 32.82276    | 0.113227    | 289.8845682 |

|    |     |       |         |             |             |             |
|----|-----|-------|---------|-------------|-------------|-------------|
| 28 | E12 | 33207 | CG31371 | 35.21162    | 0.098452333 | 357.6514523 |
| 28 | E13 | 30006 | CG32335 | 42.97305333 | 0.101087    | 425.1095921 |
| 28 | E14 | 33223 | CG32504 | 41.43546333 | 0.127377333 | 325.2969916 |
| 28 | E15 | 30007 | CG32355 | 39.61816333 | 0.094093333 | 421.0517571 |
| 28 | E16 | 33231 | CG32551 | 39.53377333 | 0.101836    | 388.2101942 |
| 28 | E17 | 30001 | CG32240 | 47.33690667 | 0.085422667 | 554.14925   |
| 28 | E18 | 33239 | CG32589 | 38.17074333 | 0.089953333 | 424.3393982 |
| 28 | E19 | 30003 | CG32267 | 44.47392    | 0.091544667 | 485.8166141 |
| 28 | E20 | 33191 | CG30186 | 37.65186667 | 0.100357333 | 375.1780305 |
| 28 | E21 | 30014 | CG32256 | 44.28099    | 0.091021    | 486.4920183 |
| 28 | E22 | 33247 | CG32853 | 37.5725     | 0.091348333 | 411.3101863 |
| 28 | E23 | 30008 | CG32386 | 46.54595667 | 0.081667333 | 569.9458372 |
| 28 | E24 | 33215 | CG32033 | 40.54939    | 0.082730333 | 490.1393282 |
| 28 | F01 | 33254 | CG3491  | 51.00435333 | 0.129670333 | 393.338646  |
| 28 | F02 | 33446 | CG8401  | 39.06479667 | 0.134847    | 289.6971877 |
| 28 | F03 | 33251 | CG3353  | 43.40237    | 0.129593333 | 334.9120582 |
| 28 | F04 | 33443 | CG8282  | 33.82112667 | 0.126698333 | 266.9421592 |
| 28 | F05 | 33359 | CG5717  | 35.43798    | 0.143341    | 247.2284971 |
| 28 | F06 | 32879 | CG10139 | 41.10389333 | 0.126456    | 325.0450222 |
| 28 | F07 | 33367 | CG5961  | 41.72692    | 0.125778    | 331.7505446 |
| 28 | F08 | 32887 | CG10470 | 35.6095     | 0.126279    | 281.9906714 |
| 28 | F09 | 33375 | CG6379  | 49.10015333 | 0.121003    | 405.7763306 |
| 28 | F10 | 32895 | CG1081  | 21.47439667 | 0.091829333 | 233.8511659 |
| 28 | F11 | 33383 | CG6546  | 67.36138    | 0.164719667 | 408.9455823 |
| 28 | F12 | 32903 | CG10979 | 34.69013    | 0.105135333 | 329.9569127 |
| 28 | F13 | 33407 | CG7327  | 36.97222    | 0.101766667 | 363.3038323 |
| 28 | F14 | 32911 | CG11180 | 35.46925    | 0.126530667 | 280.3213714 |
| 28 | F15 | 33415 | CG7539  | 33.61384333 | 0.101261    | 331.9525122 |
| 28 | F16 | 32927 | CG12101 | 39.30433    | 0.109119333 | 360.1958406 |
| 28 | F17 | 33431 | CG7918  | 38.17436    | 0.090104667 | 423.6668467 |
| 28 | F18 | 32943 | CG12532 | 34.61884    | 0.091523667 | 378.250143  |
| 28 | F19 | 33428 | CG7867  | 32.37166333 | 0.081806667 | 395.7093554 |
| 28 | F20 | 32935 | CG12269 | 33.37899667 | 0.092114333 | 362.3648509 |
| 28 | F21 | 33439 | CG8183  | 41.02980667 | 0.088917667 | 461.4359351 |
| 28 | F22 | 32959 | CG12976 | 27.59189333 | 0.090133667 | 306.1219448 |
| 28 | F23 | 33392 | CG6728  | 40.33192333 | 0.085805667 | 470.0379928 |
| 28 | F24 | 32919 | CG1151  | 42.86255    | 0.083425    | 513.785436  |
| 28 | G01 | 29820 | CG31992 | 6.010995333 | 0.107435333 | 55.94989234 |
| 28 | G02 | 17575 | CG14071 | 37.35101667 | 0.121029    | 308.6121233 |
| 28 | G03 | 29816 | CG31923 | 41.51675    | 0.120402667 | 344.8158679 |
| 28 | G04 | 17590 | CG14115 | 39.30824    | 0.115169    | 341.3092065 |
| 28 | G05 | 29819 | CG31961 | 39.55526667 | 0.117387333 | 336.9636701 |
| 28 | G06 | 33168 | CG18682 | 35.36645333 | 0.100657    | 351.3561236 |
| 28 | G07 | 29826 | CG31894 | 45.62037    | 0.107514    | 424.3202746 |
| 28 | G08 | 33176 | CG2100  | 41.17586667 | 0.118319667 | 348.0052626 |
| 28 | G09 | 29818 | CG31948 | 37.28176667 | 0.113531333 | 328.3830602 |
| 28 | G10 | 33184 | CG2715  | 37.98980333 | 0.106405667 | 357.0280092 |
| 28 | G11 | 30017 | CG32310 | 36.16742333 | 0.118498    | 305.2154748 |
| 28 | G12 | 33208 | CG31559 | 40.28323    | 0.095846333 | 420.2897346 |
| 28 | G13 | 30018 | CG32336 | 43.17763    | 0.100261333 | 430.6508657 |
| 28 | G14 | 33224 | CG32507 | 36.32036333 | 0.094571333 | 384.052567  |
| 28 | G15 | 30019 | CG32364 | 47.60158333 | 0.086409333 | 550.8847424 |
| 28 | G16 | 33232 | CG32553 | 35.27423    | 0.098139667 | 359.4288752 |
| 28 | G17 | 30013 | CG32241 | 42.87551    | 0.086256667 | 497.0689415 |

|    |     |       |         |             |             |             |
|----|-----|-------|---------|-------------|-------------|-------------|
| 28 | G18 | 33240 | CG32596 | 31.41305333 | 0.085367333 | 367.9751037 |
| 28 | G19 | 30015 | CG33161 | 36.20832333 | 0.086208    | 420.0111745 |
| 28 | G20 | 33192 | CG30187 | 37.95225333 | 0.085845    | 442.1020832 |
| 28 | G21 | 30026 | CG32257 | 39.37404333 | 0.082840333 | 475.3003971 |
| 28 | G22 | 33201 | CG31204 | 36.55183    | 0.083697333 | 436.7143915 |
| 28 | G23 | 30021 | CG32230 | 37.23361667 | 0.075373667 | 493.9870689 |
| 28 | G24 | 33216 | CG32073 | 39.61592    | 0.074276    | 533.360978  |
| 28 | H01 | 33260 | CG3637  | 32.64918667 | 0.125270333 | 260.6298379 |
| 28 | H02 | 33447 | CG8402  | 28.59201667 | 0.122617333 | 233.1808717 |
| 28 | H03 | 33252 | CG3420  | 41.40766667 | 0.125705333 | 329.4026241 |
| 28 | H04 | 33444 | CG8284  | 30.70112667 | 0.120649333 | 254.4657796 |
| 28 | H05 | 33360 | CG5737  | 31.73331    | 0.112578667 | 281.8767617 |
| 28 | H06 | 32880 | CG10153 | 31.82908333 | 0.108525    | 293.2880289 |
| 28 | H07 | 33368 | CG6033  | 35.42021667 | 0.105112333 | 336.9748872 |
| 28 | H08 | 32888 | CG10512 | 39.39515    | 0.108312667 | 363.7169245 |
| 28 | H09 | 33376 | CG6385  | 31.52830333 | 0.125092667 | 252.0395813 |
| 28 | H10 | 32896 | CG10846 | 47.35963667 | 0.109797    | 431.3381665 |
| 28 | H11 | 33384 | CG6567  | 34.39247    | 0.100859    | 340.9955482 |
| 28 | H12 | 32904 | CG10992 | 29.85088    | 0.096642667 | 308.8788941 |
| 28 | H13 | 33408 | CG7358  | 41.89230333 | 0.107355667 | 390.2197679 |
| 28 | H14 | 32912 | CG1124  | 33.25902    | 0.091968333 | 361.635563  |
| 28 | H15 | 33416 | CG7548  | 37.73897333 | 0.090630333 | 416.4055449 |
| 28 | H16 | 32928 | CG12107 | 38.04796667 | 0.087088667 | 436.887693  |
| 28 | H17 | 33432 | CG7923  | 29.84436333 | 0.089537667 | 333.3162952 |
| 28 | H18 | 32944 | CG12620 | 34.88838667 | 0.08421     | 414.3021811 |
| 28 | H19 | 33400 | CG7111  | 82.3878     | 0.102336667 | 805.0662845 |
| 28 | H20 | 32936 | CG12289 | 38.21452667 | 0.089469333 | 427.1243033 |
| 28 | H21 | 33440 | CG8186  | 25.34255    | 0.072097    | 351.506304  |
| 28 | H22 | 32952 | CG12846 | 38.77465    | 0.083328    | 465.3255808 |
| 28 | H23 | 33393 | CG6745  | 37.25418667 | 0.081873667 | 455.0203769 |
| 28 | H24 | 32920 | CG11516 | 40.57168    | 0.075453667 | 537.7032263 |
| 28 | I01 | 29832 | CG31997 | 42.47655667 | 0.143002    | 297.0347035 |
| 28 | I02 | 17583 | CG13981 | 32.16567667 | 0.124972333 | 257.3823806 |
| 28 | I03 | 29861 | CG31880 | 46.19223333 | 0.120235    | 384.1829196 |
| 28 | I04 | 17636 | CG14109 | 29.91573667 | 0.102061333 | 293.1152836 |
| 28 | I05 | 29831 | CG31962 | 35.75363    | 0.111383667 | 320.9952686 |
| 28 | I06 | 33169 | CG18744 | 33.04104333 | 0.116394667 | 283.8707673 |
| 28 | I07 | 29875 | CG31920 | 31.41532333 | 0.108825333 | 288.6765643 |
| 28 | I08 | 33177 | CG2114  | 31.04211333 | 0.10311     | 301.0582226 |
| 28 | I09 | 29830 | CG31949 | 37.11208333 | 0.11074     | 335.1280778 |
| 28 | I10 | 33185 | CG2790  | 33.83722667 | 0.109241667 | 309.7465253 |
| 28 | I11 | 30029 | CG32313 | 29.2826     | 0.098083667 | 298.5471587 |
| 28 | I12 | 33209 | CG31672 | 31.96481333 | 0.113980333 | 280.4414797 |
| 28 | I13 | 30030 | CG32341 | 31.74957333 | 0.110469667 | 287.4053511 |
| 28 | I14 | 33225 | CG32516 | 34.97411    | 0.097477667 | 358.7910051 |
| 28 | I15 | 30031 | CG32368 | 33.13968667 | 0.095214    | 348.0547679 |
| 28 | I16 | 33233 | CG32554 | 38.61283667 | 0.126476667 | 305.2961284 |
| 28 | I17 | 30025 | CG32243 | 29.08529333 | 0.093873333 | 309.835523  |
| 28 | I18 | 33241 | CG32627 | 31.71325    | 0.089171333 | 355.6440037 |
| 28 | I19 | 29996 | CG32382 | 33.23434    | 0.085899333 | 386.8986954 |
| 28 | I20 | 33193 | CG30275 | 29.80975333 | 0.083294    | 357.8859622 |
| 28 | I21 | 30038 | CG32259 | 34.43730667 | 0.084192    | 409.0330039 |
| 28 | I22 | 33249 | CG33113 | 27.84632333 | 0.093717333 | 297.1309825 |
| 28 | I23 | 30033 | CG32232 | 34.76326333 | 0.077441667 | 448.8961154 |

|    |     |       |         |             |             |             |
|----|-----|-------|---------|-------------|-------------|-------------|
| 28 | I24 | 33217 | CG32131 | 30.71224    | 0.089304    | 343.9066559 |
| 28 | J01 | 33256 | CG3526  | 32.79387    | 0.127439333 | 257.3292652 |
| 28 | J02 | 33448 | CG8414  | 36.10406    | 0.170557    | 211.6832496 |
| 28 | J03 | 33421 | CG7641  | 22.90738667 | 0.219241    | 104.484958  |
| 28 | J04 | 33452 | CG8542  | 24.74382667 | 0.142255    | 173.9399435 |
| 28 | J05 | 33361 | CG5770  | 38.06825667 | 0.139928333 | 272.0553855 |
| 28 | J06 | 32881 | CG10158 | 16.75417    | 0.109216333 | 153.4035202 |
| 28 | J07 | 33369 | CG6050  | 21.03956    | 0.115129667 | 182.7466422 |
| 28 | J08 | 32889 | CG10593 | 34.11157    | 0.114711667 | 297.3679225 |
| 28 | J09 | 33377 | CG6406  | 36.64989    | 0.114941    | 318.8582838 |
| 28 | J10 | 32897 | CG10853 | 29.81053333 | 0.105170667 | 283.449124  |
| 28 | J11 | 33385 | CG6576  | 32.28228333 | 0.104874333 | 307.8187227 |
| 28 | J12 | 32905 | CG11012 | 31.75094333 | 0.11435     | 277.6645678 |
| 28 | J13 | 33409 | CG7364  | 30.74653333 | 0.098210333 | 313.0682107 |
| 28 | J14 | 32913 | CG11248 | 28.07849333 | 0.090733667 | 309.4605824 |
| 28 | J15 | 33417 | CG7555  | 32.93793    | 0.110307667 | 298.6005506 |
| 28 | J16 | 32929 | CG1211  | 26.06418    | 0.090722333 | 287.2961821 |
| 28 | J17 | 33433 | CG7980  | 30.11585667 | 0.094896    | 317.3564393 |
| 28 | J18 | 32945 | CG12624 | 30.07773333 | 0.091349667 | 329.259366  |
| 28 | J19 | 33401 | CG7178  | 28.37973667 | 0.093938667 | 302.1092131 |
| 28 | J20 | 32937 | CG12321 | 31.79041667 | 0.103274667 | 307.8239581 |
| 28 | J21 | 33441 | CG8203  | 30.15175333 | 0.084376667 | 357.3470549 |
| 28 | J22 | 32961 | CG13002 | 28.04219333 | 0.090317667 | 310.4840323 |
| 28 | J23 | 33394 | CG6752  | 24.46728333 | 0.083186333 | 294.1262387 |
| 28 | J24 | 32956 | CG12970 | 30.17325667 | 0.078631333 | 383.7307011 |
| 28 | K02 | 17620 | CG13997 | 19.66898    | 0.123780667 | 158.9018748 |
| 28 | K03 | 29840 | CG31925 | 26.00605333 | 0.142405333 | 182.6199393 |
| 28 | K04 | 17626 | CG14121 | 31.07870333 | 0.122048    | 254.6432824 |
| 28 | K05 | 29791 | CG31906 | 26.25059333 | 0.135340333 | 193.9598691 |
| 28 | K06 | 33170 | CG18745 | 32.93499333 | 0.117300333 | 280.7749339 |
| 28 | K07 | 29850 | CG31898 | 32.39269    | 0.119294333 | 271.5358651 |
| 28 | K08 | 33178 | CG2146  | 30.88296667 | 0.107279667 | 287.8734398 |
| 28 | K09 | 29866 | CG31955 | 27.01594333 | 0.123282333 | 219.138806  |
| 28 | K1  | 29844 | CG32000 | 26.64964    | 0.117486    | 226.8324737 |
| 28 | K10 | 33186 | CG2916  | 30.00160667 | 0.103293333 | 290.4505615 |
| 28 | K11 | 30041 | CG32315 | 32.09776    | 0.128362667 | 250.0552601 |
| 28 | K12 | 33210 | CG31733 | 23.85054333 | 0.132286667 | 180.2943859 |
| 28 | K13 | 30042 | CG32343 | 22.22132667 | 0.105596667 | 210.4358723 |
| 28 | K14 | 33226 | CG32530 | 21.73484333 | 0.102986    | 211.0465824 |
| 28 | K15 | 30043 | CG32371 | 27.63428    | 0.109597333 | 252.1437261 |
| 28 | K16 | 33234 | CG32559 | 30.20919    | 0.096711667 | 312.3634515 |
| 28 | K17 | 30052 | CG32304 | 29.86549    | 0.100007667 | 298.6320049 |
| 28 | K18 | 33242 | CG32664 | 28.03085667 | 0.102966333 | 272.2332219 |
| 28 | K19 | 30039 | CG32275 | 28.72460667 | 0.106633333 | 269.3773679 |
| 28 | K20 | 33194 | CG30284 | 29.96503333 | 0.100721333 | 297.5043354 |
| 28 | K21 | 30050 | CG32260 | 29.21464    | 0.096702333 | 302.108946  |
| 28 | K22 | 33199 | CG3074  | 29.71335333 | 0.095941667 | 309.7022844 |
| 28 | K23 | 30045 | CG32233 | 28.68406    | 0.09341     | 307.0769725 |
| 28 | K24 | 33218 | CG32138 | 18.52521667 | 0.090287667 | 205.1799249 |
| 28 | L01 | 33257 | CG3556  | 25.30136    | 0.128898    | 196.2897795 |
| 28 | L02 | 33449 | CG8454  | 49.74206    | 0.224169333 | 221.8950258 |
| 28 | L03 | 33422 | CG7693  | 33.81758333 | 0.112805333 | 299.7870964 |
| 28 | L04 | 32949 | CG12749 | 27.04653333 | 0.152316    | 177.5685636 |
| 28 | L05 | 33362 | CG5771  | 29.56266333 | 0.12339     | 239.5871897 |

|    |     |       |         |             |             |             |
|----|-----|-------|---------|-------------|-------------|-------------|
| 28 | L06 | 32882 | CG10159 | 22.18493667 | 0.117960667 | 188.0706281 |
| 28 | L07 | 33370 | CG6127  | 29.98924667 | 0.124078    | 241.6967284 |
| 28 | L08 | 32890 | CG10630 | 33.79465    | 0.117799667 | 286.8823907 |
| 28 | L09 | 33378 | CG6425  | 31.40448667 | 0.131603    | 238.630477  |
| 28 | L10 | 32898 | CG10877 | 30.76974    | 0.121849333 | 252.5228424 |
| 28 | L11 | 33386 | CG6620  | 16.91791667 | 0.103642    | 163.2341779 |
| 28 | L12 | 32906 | CG11062 | 31.21014333 | 0.106869    | 292.0411282 |
| 28 | L13 | 33410 | CG7405  | 30.74271333 | 0.105281333 | 292.0053571 |
| 28 | L14 | 32914 | CG11278 | 27.49345667 | 0.119951    | 229.2057312 |
| 28 | L15 | 33418 | CG7560  | 27.02945333 | 0.098849333 | 273.4409269 |
| 28 | L16 | 32930 | CG12177 | 31.17432667 | 0.112076667 | 278.1518009 |
| 28 | L17 | 33434 | CG8008  | 27.78665333 | 0.091832667 | 302.5791839 |
| 28 | L18 | 32946 | CG12661 | 22.07779667 | 0.093895667 | 235.1311562 |
| 28 | L19 | 33402 | CG7194  | 27.17973    | 0.090647333 | 299.8403704 |
| 28 | L20 | 32938 | CG12362 | 28.17431333 | 0.092249667 | 305.4137142 |
| 28 | L21 | 33425 | CG7748  | 22.77206667 | 0.090268    | 252.2717537 |
| 28 | L22 | 32962 | CG13024 | 29.73120667 | 0.097309333 | 305.5329396 |
| 28 | L23 | 33395 | CG6759  | 32.91900667 | 0.100805333 | 326.5601688 |
| 28 | L24 | 32922 | CG1169  | 33.80331    | 0.077819333 | 434.3819017 |
| 28 | M01 | 29856 | CG32005 | 33.47567    | 0.141827333 | 236.03116   |
| 28 | M02 | 17632 | CG14000 | 34.13572667 | 0.134074    | 254.6036269 |
| 28 | M03 | 29852 | CG31926 | 34.28401667 | 0.118017    | 290.5006623 |
| 28 | M04 | 33197 | CG30501 | 38.52487    | 0.127477    | 302.2103595 |
| 28 | M05 | 29803 | CG31907 | 26.94761    | 0.125467    | 214.7784676 |
| 28 | M06 | 33171 | CG1951  | 30.45889667 | 0.140884    | 216.1984091 |
| 28 | M07 | 29862 | CG31900 | 32.44863667 | 0.123796333 | 262.1130674 |
| 28 | M08 | 33179 | CG2184  | 31.64320667 | 0.132142333 | 239.4630537 |
| 28 | M09 | 29854 | CG31954 | 34.75215333 | 0.117662667 | 295.3541197 |
| 28 | M10 | 33187 | CG30177 | 29.22228667 | 0.115575    | 252.8426274 |
| 28 | M11 | 30053 | CG32319 | 28.39516333 | 0.105064333 | 270.2645363 |
| 28 | M12 | 33211 | CG31763 | 41.93133333 | 0.110668    | 378.8930254 |
| 28 | M13 | 30054 | CG32345 | 28.13981    | 0.110082    | 255.6258971 |
| 28 | M14 | 33227 | CG32531 | 29.24627667 | 0.111506    | 262.2843315 |
| 28 | M15 | 30055 | CG32374 | 28.70928333 | 0.102467667 | 280.1789508 |
| 28 | M16 | 33235 | CG32562 | 29.85525667 | 0.119216667 | 250.4285475 |
| 28 | M17 | 30049 | CG32247 | 29.98645667 | 0.101928    | 294.1925346 |
| 28 | M18 | 33243 | CG32668 | 26.04567    | 0.100668    | 258.7283943 |
| 28 | M19 | 30051 | CG32276 | 26.65323667 | 0.096263    | 276.8793479 |
| 28 | M20 | 33195 | CG30343 | 31.02545333 | 0.096840333 | 320.377391  |
| 28 | M21 | 30064 | CG32305 | 28.38918333 | 0.104848    | 270.7651394 |
| 28 | M22 | 33200 | CG31067 | 31.29801333 | 0.092017667 | 340.1304822 |
| 28 | M23 | 30057 | CG32234 | 30.22962667 | 0.101888667 | 296.69273   |
| 28 | M24 | 33220 | CG32220 | 30.9448     | 0.096352667 | 321.161843  |
| 28 | N01 | 33258 | CG3569  | 25.25728667 | 0.143329667 | 176.2181358 |
| 28 | N02 | 33450 | CG8485  | 28.11313667 | 0.166162667 | 169.1904519 |
| 28 | N03 | 33427 | CG7815  | 30.60652    | 0.160030667 | 191.254093  |
| 28 | N04 | 32950 | CG12796 | 25.58085    | 0.143015667 | 178.8674667 |
| 28 | N05 | 33363 | CG5778  | 25.52095333 | 0.138660333 | 184.0537428 |
| 28 | N06 | 32883 | CG10164 | 29.74765667 | 0.122418    | 243.0006753 |
| 28 | N07 | 33371 | CG6324  | 25.64904333 | 0.128208    | 200.0580567 |
| 28 | N08 | 32891 | CG10632 | 26.33679667 | 0.132132333 | 199.3213622 |
| 28 | N09 | 33379 | CG6428  | 27.42669667 | 0.113098333 | 242.503102  |
| 28 | N10 | 32899 | CG10895 | 18.90345    | 0.125336333 | 150.8217888 |
| 28 | N11 | 33387 | CG6661  | 26.64706667 | 0.112741667 | 236.3550891 |

|    |     |       |          |             |             |             |
|----|-----|-------|----------|-------------|-------------|-------------|
| 28 | N12 | 32907 | CG11066  | 31.92904    | 0.114625333 | 278.5513383 |
| 28 | N13 | 33411 | CG7430   | 46.50853333 | 0.127737333 | 364.0950701 |
| 28 | N14 | 32915 | CG11313  | 24.64414    | 0.115443333 | 213.4739122 |
| 28 | N15 | 33419 | CG7581   | 51.35383    | 0.167407333 | 306.7597397 |
| 28 | N16 | 32931 | CG12200  | 28.58880333 | 0.109923    | 260.0802683 |
| 28 | N17 | 33435 | CG8091   | 28.12506667 | 0.145973333 | 192.6726343 |
| 28 | N18 | 32947 | CG12663  | 24.86310333 | 0.097735333 | 254.392168  |
| 28 | N19 | 33403 | CG7235   | 26.15791333 | 0.106567667 | 245.4582534 |
| 28 | N20 | 32924 | CG11888  | 3.134795    | 0.073412667 | 42.70100982 |
| 28 | N21 | 33426 | CG7807   | 24.17378    | 0.093068333 | 259.7422682 |
| 28 | N22 | 32963 | CG13026  | 28.02312333 | 0.096847333 | 289.3535874 |
| 28 | N23 | 33396 | CG6873   | 23.28987667 | 0.102341    | 227.571322  |
| 28 | N24 | 32923 | CG11883  | 23.88566667 | 0.094317333 | 253.2479007 |
| 28 | O01 | 29868 | CG32006  | 33.30571333 | 0.138218    | 240.9650938 |
| 28 | O02 | 17647 | CG14088  | 32.52238    | 0.132507667 | 245.4377231 |
| 28 | O03 | 29864 | CG31932  | 31.11439667 | 0.134352667 | 231.5874886 |
| 28 | O04 | 33198 | CG3060   | 44.14871667 | 0.161963667 | 272.5840775 |
| 28 | O05 | 29863 | CG31916  | 37.96020667 | 0.137279    | 276.5186712 |
| 28 | O06 | 33172 | CG1975   | 32.27826    | 0.138715    | 232.6948059 |
| 28 | O07 | 29874 | CG31902  | 34.13440667 | 0.128116667 | 266.4322102 |
| 28 | O08 | 33180 | CG2269   | 33.79081667 | 0.122922    | 274.8964113 |
| 28 | O09 | 29992 | CG32282  | 39.97706    | 0.176087    | 227.0301612 |
| 28 | O10 | 33188 | CG30178  | 32.42776667 | 0.143443667 | 226.0662141 |
| 28 | O11 | 30004 | CG32295  | 33.13837333 | 0.114215    | 290.140291  |
| 28 | O12 | 33212 | CG31826  | 34.15383333 | 0.118769667 | 287.5636035 |
| 28 | O13 | 30028 | CG32298  | 31.53857667 | 0.118832667 | 265.4032561 |
| 28 | O14 | 33228 | CG32535  | 41.53079333 | 0.102182    | 406.4394251 |
| 28 | O15 | 30067 | CG32375  | 31.60991667 | 0.103141667 | 306.4708734 |
| 28 | O16 | 33236 | CG32568  | 30.89058333 | 0.109948333 | 280.9554488 |
| 28 | O17 | 30061 | CG32248  | 29.66206667 | 0.110949667 | 267.3470553 |
| 28 | O18 | 33244 | CG3273   | 29.81413667 | 0.107133667 | 278.2891466 |
| 28 | O19 | 30063 | CG32279  | 40.17037    | 0.107835667 | 372.5146906 |
| 28 | O20 | 33204 | CG31357  | 29.54289667 | 0.099503667 | 296.9025932 |
| 28 | O21 |       | wts      | 116.32896   | 0.088698667 | 1311.507426 |
| 28 | O22 |       | HFA17794 | 2.990404667 | 0.034592    | 86.44786849 |
| 28 | O23 |       | hpo      | 75.64425    | 0.093865    | 805.8834496 |
| 28 | O24 |       | Luc      | 6.01741     | 0.093593    | 64.29337664 |
| 28 | P01 | 33259 | CG3615   | 39.71220333 | 0.161018667 | 246.6310531 |
| 28 | P02 | 33451 | CG8517   | 32.71175    | 0.162201    | 201.6741574 |
| 28 | P03 | 33424 | CG7716   | 30.18566    | 0.159439    | 189.324193  |
| 28 | P04 | 32951 | CG12812  | 28.40322    | 0.139577333 | 203.4945025 |
| 28 | P05 | 33364 | CG5812   | 26.83433333 | 0.138846333 | 193.2664168 |
| 28 | P06 | 32884 | CG10176  | 31.04102667 | 0.136624333 | 227.19984   |
| 28 | P07 | 33372 | CG6367   | 31.57294667 | 0.116118667 | 271.9024217 |
| 28 | P08 | 32892 | CG10659  | 28.61889667 | 0.124472333 | 229.9217497 |
| 28 | P09 | 33380 | CG6429   | 31.70819    | 0.118887667 | 266.7071437 |
| 28 | P10 | 32900 | CG10919  | 26.59414667 | 0.128420333 | 207.0867282 |
| 28 | P11 | 33388 | CG6688   | 31.11747    | 0.110230667 | 282.2941287 |
| 28 | P12 | 32908 | CG11094  | 32.04679667 | 0.128777    | 248.8549715 |
| 28 | P13 | 33412 | CG7454   | 30.408      | 0.111453    | 272.8324944 |
| 28 | P14 | 32916 | CG11326  | 29.80381333 | 0.109610667 | 271.9061405 |
| 28 | P15 | 33420 | CG7587   | 26.70835667 | 0.097850333 | 272.9511056 |
| 28 | P16 | 32932 | CG12213  | 31.67735667 | 0.097882    | 323.6280079 |
| 28 | P17 | 33436 | CG8137   | 27.88769667 | 0.110607333 | 252.1324385 |

|    |     |       |                |             |             |             |
|----|-----|-------|----------------|-------------|-------------|-------------|
| 28 | P18 | 32955 | CG12928        | 26.47174333 | 0.097526333 | 271.4317501 |
| 28 | P19 | 33404 | CG7263         | 28.70673667 | 0.097994333 | 292.9428232 |
| 28 | P20 | 32940 | CG12436        | 31.56256667 | 0.094908333 | 332.5584336 |
| 28 | P21 |       | wts            | 108.4413    | 0.075499    | 1436.327633 |
| 28 | P22 |       | HFA17794       | 2.321216    | 0.031843667 | 72.89411814 |
| 28 | P23 |       | hpo            | 73.30047333 | 0.078928333 | 928.6965813 |
| 28 | P24 |       | Luc            | 4.481125    | 0.087417667 | 51.26109139 |
| 29 | A01 |       | DIAP1          | 1.209721    | 0.011751333 | 102.9432972 |
| 29 | A02 |       | ex/ft          | 113.3087667 | 0.105823667 | 1070.731815 |
| 29 | A03 |       | Luc            | 3.680437    | 0.118102    | 31.16320638 |
| 29 | A04 |       | hpo            | 80.57966667 | 0.086698    | 929.4293602 |
| 29 | A05 | 21948 | CG17260        | 30.41638    | 0.100645    | 302.2145164 |
| 29 | A06 | 33356 | CG5528         | 30.16659333 | 0.106841    | 282.3503462 |
| 29 | A07 | 21991 | CG17085,CG6647 | 29.74413667 | 0.097317667 | 305.6396406 |
| 29 | A08 | 24529 | CG11048        | 23.17967333 | 0.085264667 | 271.8555556 |
| 29 | A09 | 33261 | CG3680         | 34.72539333 | 0.111082333 | 312.6095059 |
| 29 | A10 | 24531 | CG11154        | 22.8622     | 0.090364    | 253.0011952 |
| 29 | A11 | 33277 | CG40207        | 26.41495    | 0.092651    | 285.1016179 |
| 29 | A12 | 24525 | CG10949        | 30.52513333 | 0.105583333 | 289.1093923 |
| 29 | A13 | 33317 | CG4453         | 9.202756333 | 0.100336333 | 91.71908149 |
| 29 | A14 | 24532 | CG11242        | 22.87176333 | 0.090959333 | 251.4504284 |
| 29 | A15 | 33285 | CG40270        | 25.93812333 | 0.091748333 | 282.709477  |
| 29 | A16 | 24526 | CG31550        | 26.05522    | 0.092236333 | 282.4832586 |
| 29 | A17 | 33301 | CG40448        | 30.97465333 | 0.092759667 | 333.923724  |
| 29 | A18 | 24528 | CG12288        | 23.96997    | 0.079229667 | 302.537812  |
| 29 | A19 | 33325 | CG4756         | 26.63200667 | 0.078596    | 338.8468455 |
| 29 | A20 | 24545 | CG11325        | 24.92134667 | 0.069197333 | 360.148946  |
| 29 | A21 | 33269 | CG3971         | 30.14136    | 0.077517    | 388.8354812 |
| 29 | A22 | 24548 | CG12132        | 25.60681    | 0.079365667 | 322.6434184 |
| 29 | A23 | 33294 | CG40339        | 34.10467667 | 0.072957667 | 467.4584348 |
| 29 | A24 | 24546 | CG12076        | 27.98563    | 0.077111333 | 362.9249916 |
| 29 | B01 |       | DIAP1          | 1.324607333 | 0.01491     | 88.84019674 |
| 29 | B02 |       | ex/ft          | 117.7567333 | 0.127929    | 920.4850607 |
| 29 | B03 |       | Luc            | 3.858621667 | 0.132647667 | 29.08925399 |
| 29 | B04 |       | hpo            | 101.6702933 | 0.108966333 | 933.0431724 |
| 29 | B05 | 19482 | CG5074         | 33.66204667 | 0.116044333 | 290.0791939 |
| 29 | B06 | 32997 | CG13416        | 29.02922333 | 0.134680333 | 215.5416653 |
| 29 | B07 | 19473 | CG4022         | 24.64813333 | 0.097665    | 252.3742726 |
| 29 | B08 | 33045 | CG14185        | 37.72833333 | 0.126795667 | 297.5522297 |
| 29 | B09 | 19483 | CG5148         | 54.15183667 | 0.172137    | 314.5856885 |
| 29 | B10 | 33061 | CG14328        | 31.4377     | 0.109545333 | 286.9834711 |
| 29 | B11 | 19492 | CG4362         | 28.27880333 | 0.102495667 | 275.9024284 |
| 29 | B12 | 33005 | CG13647        | 26.65948    | 0.097504    | 273.4193469 |
| 29 | B13 | 19493 | CG5050         | 38.20430333 | 0.109059    | 350.3085791 |
| 29 | B14 | 33029 | CG14104        | 32.68595333 | 0.102743    | 318.1331413 |
| 29 | B15 | 19488 | CG5467         | 27.19515333 | 0.106065667 | 256.3992118 |
| 29 | B16 | 33021 | CG14031        | 32.43413333 | 0.103345667 | 313.8412512 |
| 29 | B17 | 19489 | CG4123         | 28.40456667 | 0.084876    | 334.6595818 |
| 29 | B18 | 33013 | CG13912        | 32.77653667 | 0.093320667 | 351.2248448 |
| 29 | B19 | 19490 | CG4196         | 27.84164    | 0.088131    | 315.9119946 |
| 29 | B20 | 33069 | CG14535        | 31.02461667 | 0.105862667 | 293.0647569 |
| 29 | B21 | 32989 | CG13288        | 13.20157    | 0.072364333 | 182.4319992 |
| 29 | B22 | 33093 | CG15249        | 28.35542    | 0.070494333 | 402.2368701 |
| 29 | B23 | 32973 | CG13078        | 32.14680667 | 0.093611    | 343.4084313 |



|    |     |       |                 |             |             |             |
|----|-----|-------|-----------------|-------------|-------------|-------------|
| 29 | B24 | 33077 | CG14756         | 34.51612    | 0.087639    | 393.8442931 |
| 29 | C01 | 32965 | CG13045         | 49.59792    | 0.115171333 | 430.6446627 |
| 29 | C02 | 33341 | CG5358          | 47.66322    | 0.115765    | 411.7239235 |
| 29 | C03 | 32972 | CG13077         | 42.79743333 | 0.11495     | 372.3134696 |
| 29 | C04 | 33349 | CG5439          | 40.69791    | 0.105884    | 384.363171  |
| 29 | C05 | 21943 | CG17786         | 37.08356667 | 0.113229    | 327.5094425 |
| 29 | C06 | 24542 | CG11115         | 47.59213    | 0.135933    | 350.1146153 |
| 29 | C07 | 22025 | CG13612,CG17784 | 39.50071667 | 0.112147667 | 352.2205842 |
| 29 | C08 | 24541 | CG11050         | 35.16328    | 0.088627    | 396.7558419 |
| 29 | C09 | 33262 | CG3698          | 48.70363    | 0.113939667 | 427.4510487 |
| 29 | C10 | 24543 | CG11164         | 41.8485     | 0.106348667 | 393.5028178 |
| 29 | C11 | 33278 | CG40211         | 35.59620667 | 0.103907667 | 342.5753634 |
| 29 | C12 | 24537 | CG10960         | 39.02438667 | 0.107935333 | 361.5533993 |
| 29 | C13 | 33318 | CG4475          | 44.27543667 | 0.107662667 | 411.2422443 |
| 29 | C14 | 24544 | CG11255         | 35.05770667 | 0.098972333 | 354.2172392 |
| 29 | C15 | 33286 | CG40285         | 33.36659667 | 0.094571    | 352.8205969 |
| 29 | C16 | 24547 | CG12108         | 35.30805333 | 0.090141    | 391.6980434 |
| 29 | C17 | 33302 | CG40451         | 23.52252    | 0.131780333 | 178.4979549 |
| 29 | C18 | 24540 | CG12292         | 31.99937    | 0.082647333 | 387.1797033 |
| 29 | C19 | 33326 | CG4779          | 33.30647667 | 0.093224333 | 357.2723502 |
| 29 | C20 | 24557 | CG11333         | 36.6593     | 0.090036333 | 407.1611831 |
| 29 | C21 | 33339 | CG5325          | 40.76716333 | 0.083573667 | 487.7991473 |
| 29 | C22 | 24587 | CG12268         | 42.28115    | 0.095970667 | 440.5632624 |
| 29 | C23 | 33340 | CG5336          | 29.94081333 | 0.089028333 | 336.3065691 |
| 29 | C24 | 24558 | CG12079         | 42.77575333 | 0.109655333 | 390.0927755 |
| 29 | D01 | 19593 | CG6708          | 45.81532    | 0.120637667 | 379.7762446 |
| 29 | D02 | 33037 | CG14157         | 46.38789667 | 0.128270333 | 361.6416631 |
| 29 | D03 | 19642 | CG6747          | 32.5394     | 0.152983333 | 212.6989868 |
| 29 | D04 | 33053 | CG14242         | 40.20232    | 0.112835333 | 356.2919416 |
| 29 | D05 | 19494 | CG5084          | 32.18363333 | 0.104544667 | 307.8457693 |
| 29 | D06 | 32998 | CG13428         | 37.61053667 | 0.098867333 | 380.4141914 |
| 29 | D07 | 19526 | CG4285          | 32.90611667 | 0.0926      | 355.3576314 |
| 29 | D08 | 33046 | CG14204         | 36.22801    | 0.120959333 | 299.5057016 |
| 29 | D09 | 19497 | CG5376          | 34.77802333 | 0.119571    | 290.8566737 |
| 29 | D10 | 33062 | CG14333         | 39.62422    | 0.116798667 | 339.2523316 |
| 29 | D11 | 19503 | CG4363          | 33.52731    | 0.098191    | 341.4499292 |
| 29 | D12 | 32995 | CG13333         | 40.19003667 | 0.120341    | 333.9679466 |
| 29 | D13 | 19504 | CG32437,CG32440 | 39.54576333 | 0.097859667 | 404.1068673 |
| 29 | D14 | 33030 | CG14105         | 35.30597    | 0.091215667 | 387.0603734 |
| 29 | D15 | 19499 | CG5474          | 27.96353    | 0.113407667 | 246.575305  |
| 29 | D16 | 33022 | CG14048         | 37.47682    | 0.095141    | 393.9081994 |
| 29 | D17 | 19500 | CG4125          | 36.25626333 | 0.081579    | 444.4313283 |
| 29 | D18 | 33060 | CG14324         | 31.66549667 | 0.091061667 | 347.736845  |
| 29 | D19 | 19501 | CG4207          | 35.43464333 | 0.083291667 | 425.4284342 |
| 29 | D20 | 33070 | CG14574         | 33.51704333 | 0.080533    | 416.1901746 |
| 29 | D21 | 32980 | CG13158         | 27.42590667 | 0.093820667 | 292.3226581 |
| 29 | D22 | 33094 | CG15283         | 33.53279333 | 0.081075    | 413.6021379 |
| 29 | D23 | 32974 | CG13110         | 38.50027667 | 0.085773    | 448.8624237 |
| 29 | D24 | 33078 | CG14770         | 37.24765667 | 0.077056    | 483.3842487 |
| 29 | E01 | 32966 | CG13046         | 99.65042667 | 0.132115667 | 754.2665392 |
| 29 | E02 | 33342 | CG5363          | 3.438657667 | 0.046440333 | 74.04463792 |
| 29 | E03 | 21969 | CG17196         | 57.58537333 | 0.105352333 | 546.5979871 |
| 29 | E04 | 33350 | CG5452          | 45.21105    | 0.099858    | 452.7534098 |
| 29 | E05 | 21965 | CG17777         | 60.46669333 | 0.096830333 | 624.4602415 |

|    |     |       |                |             |             |             |
|----|-----|-------|----------------|-------------|-------------|-------------|
| 29 | E06 | 24554 | CG11123        | 63.77707    | 0.107811333 | 591.5618333 |
| 29 | E07 | 33333 | CG5149         | 63.78498    | 0.086195333 | 740.0050273 |
| 29 | E08 | 24553 | CG11055        | 56.53618    | 0.097766667 | 578.2766451 |
| 29 | E09 | 33263 | CG3722         | 59.43783667 | 0.094510333 | 628.9030476 |
| 29 | E10 | 24555 | CG11173        | 58.52932667 | 0.096694333 | 605.3025513 |
| 29 | E11 | 33279 | CG40214        | 59.39462    | 0.100064667 | 593.562363  |
| 29 | E12 | 24549 | CG10964        | 55.42210333 | 0.097375667 | 569.1576266 |
| 29 | E13 | 33319 | CG4481         | 58.87828    | 0.092001    | 639.9743481 |
| 29 | E14 | 24556 | CG11261        | 49.08368    | 0.081475    | 602.4385394 |
| 29 | E15 | 33287 | CG40286        | 53.60471333 | 0.07954     | 673.9340374 |
| 29 | E16 | 24559 | CG12109        | 93.45776667 | 0.095253667 | 981.1461326 |
| 29 | E17 | 33303 | CG4086         | 63.50065667 | 0.081039333 | 783.5782213 |
| 29 | E18 | 24575 | CG12267        | 25.45248667 | 0.090623    | 280.8612236 |
| 29 | E19 | 33327 | CG4804         | 52.67250667 | 0.082771    | 636.3642661 |
| 29 | E20 | 24569 | CG11335        | 67.56291    | 0.071525333 | 944.6011203 |
| 29 | E21 | 33271 | CG3988         | 55.97191667 | 0.077953333 | 718.0182588 |
| 29 | E22 | 24572 | CG30008        | 57.82128333 | 0.07316     | 790.3401221 |
| 29 | E23 | 33296 | CG40371        | 57.22163333 | 0.073216    | 781.5454728 |
| 29 | E24 | 24570 | CG12082        | 46.77825667 | 0.071595333 | 653.3701917 |
| 29 | F01 | 19605 | CG6713         | 45.90416333 | 0.137374667 | 334.1530462 |
| 29 | F02 | 33038 | CG14164        | 50.38814    | 0.130410333 | 386.3814984 |
| 29 | F03 | 19654 | CG30016,CG6751 | 58.91723667 | 0.127159667 | 463.3327392 |
| 29 | F04 | 33054 | CG14258        | 46.60225333 | 0.132839    | 350.8175561 |
| 29 | F05 | 19505 | CG5099         | 24.55244    | 0.158185    | 155.2134526 |
| 29 | F06 | 32999 | CG13444        | 46.00274    | 0.118596333 | 387.8934425 |
| 29 | F07 | 19496 | CG4064         | 43.84975667 | 0.090167333 | 486.3153322 |
| 29 | F08 | 33047 | CG14215        | 49.26654    | 0.108454667 | 454.2592911 |
| 29 | F09 | 19506 | CG5177         | 29.17177    | 0.089853667 | 324.6586487 |
| 29 | F10 | 33063 | CG14342        | 42.84229667 | 0.100157    | 427.751397  |
| 29 | F11 | 19515 | CG5003         | 39.69353667 | 0.093395667 | 425.0040509 |
| 29 | F12 | 33007 | CG13732        | 49.98368333 | 0.097234333 | 514.0538493 |
| 29 | F13 | 19516 | CG5052         | 34.76968333 | 0.104739333 | 331.963955  |
| 29 | F14 | 33031 | CG14106        | 39.36956    | 0.08856     | 444.5523939 |
| 29 | F15 | 19511 | CG5498         | 40.11979333 | 0.079857333 | 502.3933515 |
| 29 | F16 | 33023 | CG14053        | 37.16862667 | 0.089561667 | 415.0059735 |
| 29 | F17 | 19512 | CG30389        | 37.87236333 | 0.071601    | 528.9362346 |
| 29 | F18 | 33015 | CG13926        | 39.38548    | 0.08192     | 480.7797852 |
| 29 | F19 | 32981 | CG13163        | 36.08873333 | 0.073172667 | 493.1996465 |
| 29 | F20 | 33071 | CG14641        | 96.57973333 | 0.089786667 | 1075.657856 |
| 29 | F21 | 32991 | CG13296        | 36.94621    | 0.085214333 | 433.5680226 |
| 29 | F22 | 33085 | CG15009        | 41.96468333 | 0.065824    | 637.5286117 |
| 29 | F23 | 32975 | CG13111        | 38.83449333 | 0.076519333 | 507.5121756 |
| 29 | F24 | 33079 | CG14772        | 35.24266667 | 0.076465667 | 460.8953038 |
| 29 | G01 | 32967 | CG13056        | 50.83381333 | 0.107995    | 470.7052487 |
| 29 | G02 | 33343 | CG5371         | 17.84713    | 0.089228333 | 200.0163999 |
| 29 | G03 | 21975 | CG17009        | 42.39047    | 0.090613    | 467.818856  |
| 29 | G04 | 33351 | CG5458         | 42.05926667 | 0.097356333 | 432.013668  |
| 29 | G05 | 21966 | CG17797        | 43.88960667 | 0.10553     | 415.8969645 |
| 29 | G06 | 24566 | CG11129        | 42.23754    | 0.087235    | 484.18112   |
| 29 | G07 | 33334 | CG5194         | 42.45279    | 0.102058    | 415.9672931 |
| 29 | G08 | 24565 | CG32626        | 34.36208333 | 0.091273    | 376.4758837 |
| 29 | G09 | 33264 | CG3738         | 45.49459    | 0.101106333 | 449.9677567 |
| 29 | G10 | 24567 | CG11196        | 43.81039667 | 0.101484667 | 431.6947388 |
| 29 | G11 | 33280 | CG40233        | 45.01167    | 0.081382    | 553.0912241 |

|    |     |       |         |             |             |             |
|----|-----|-------|---------|-------------|-------------|-------------|
| 29 | G12 | 24561 | CG32112 | 42.76282333 | 0.077252333 | 553.5473362 |
| 29 | G13 | 33320 | CG4604  | 33.95708667 | 0.086328    | 393.3496278 |
| 29 | G14 | 24568 | CG11265 | 33.85455333 | 0.083393    | 405.9639698 |
| 29 | G15 | 33288 | CG40293 | 43.47620333 | 0.092115667 | 471.9740399 |
| 29 | G16 | 24571 | CG12121 | 30.11018667 | 0.073334333 | 410.5878556 |
| 29 | G17 | 33304 | CG4099  | 21.50380667 | 0.144972    | 148.3307581 |
| 29 | G18 | 24564 | CG12301 | 45.04805333 | 0.082702333 | 544.7011169 |
| 29 | G19 | 33328 | CG4968  | 34.66081667 | 0.078602667 | 440.9623507 |
| 29 | G20 | 24581 | CG11337 | 49.49559667 | 0.068911667 | 718.2469829 |
| 29 | G21 | 33272 | CG4000  | 39.76991333 | 0.074908667 | 530.912044  |
| 29 | G22 | 24584 | CG12139 | 51.70772    | 0.083604333 | 618.4813387 |
| 29 | G23 | 33297 | CG40376 | 41.15353333 | 0.073837667 | 557.3514873 |
| 29 | G24 | 24582 | CG33166 | 39.91905333 | 0.059966667 | 665.6873819 |
| 29 | H01 | 19617 | CG6716  | 44.42099667 | 0.114626    | 387.5298507 |
| 29 | H02 | 33039 | CG14166 | 41.78855667 | 0.115027    | 363.2934586 |
| 29 | H03 | 19510 | CG5403  | 45.44557667 | 0.104974667 | 432.9194663 |
| 29 | H04 | 33055 | CG14273 | 39.27565    | 0.114912333 | 341.7879427 |
| 29 | H05 | 19517 | CG32425 | 45.01086333 | 0.103934    | 433.0715967 |
| 29 | H06 | 33000 | CG13458 | 44.90330667 | 0.106069667 | 423.3378691 |
| 29 | H07 | 19508 | CG4068  | 33.77445    | 0.080989333 | 417.0234352 |
| 29 | H08 | 33048 | CG14218 | 34.39497667 | 0.084780333 | 405.6952281 |
| 29 | H09 | 19521 | CG5385  | 34.99596    | 0.082860667 | 422.3470726 |
| 29 | H10 | 33064 | CG14360 | 37.08300667 | 0.091184    | 406.6832631 |
| 29 | H11 | 19527 | CG5010  | 36.54741333 | 0.090965667 | 401.7715109 |
| 29 | H12 | 33008 | CG13785 | 37.14375667 | 0.083816333 | 443.1565447 |
| 29 | H13 | 19528 | CG5053  | 37.74894    | 0.068333    | 552.426207  |
| 29 | H14 | 33032 | CG14118 | 33.68494    | 0.085996667 | 391.700531  |
| 29 | H15 | 19523 | CG5500  | 33.45242333 | 0.076464333 | 437.4905512 |
| 29 | H16 | 33024 | CG14061 | 44.28075    | 0.081757667 | 541.6097573 |
| 29 | H17 | 19548 | CG33143 | 37.72892667 | 0.065304667 | 577.7370683 |
| 29 | H18 | 33016 | CG13950 | 37.25700667 | 0.079464333 | 468.8519378 |
| 29 | H19 | 32982 | CG13197 | 33.30369    | 0.071456667 | 466.0683398 |
| 29 | H20 | 33072 | CG14694 | 34.51603    | 0.073144333 | 471.8893238 |
| 29 | H21 | 32992 | CG13309 | 37.62936333 | 0.074506667 | 505.0469309 |
| 29 | H22 | 33086 | CG15028 | 40.52153333 | 0.078618    | 515.4231007 |
| 29 | H23 | 32976 | CG13113 | 44.28259    | 0.072241333 | 612.9813496 |
| 29 | H24 | 33080 | CG14793 | 36.89457333 | 0.069220333 | 533.0019599 |
| 29 | I01 | 32964 | CG13040 | 58.63653    | 0.124389333 | 471.3951625 |
| 29 | I02 | 33344 | CG5381  | 38.23968667 | 0.125057    | 305.7780585 |
| 29 | I03 | 21993 | CG17203 | 47.11680333 | 0.115519    | 407.8705956 |
| 29 | I04 | 33352 | CG5489  | 36.58424667 | 0.114315333 | 320.0292174 |
| 29 | I05 | 21970 | CG17226 | 33.93525    | 0.096925    | 350.1186484 |
| 29 | I06 | 24578 | CG11130 | 27.22906333 | 0.127348    | 213.8161835 |
| 29 | I07 | 33335 | CG5247  | 39.02785333 | 0.110877667 | 351.9902114 |
| 29 | I08 | 24577 | CG11069 | 33.66155    | 0.121714333 | 276.5619223 |
| 29 | I09 | 33265 | CG3759  | 31.32111    | 0.116509    | 268.8299616 |
| 29 | I10 | 24579 | CG11201 | 31.42843333 | 0.106625333 | 294.7557804 |
| 29 | I11 | 33281 | CG40245 | 35.08801    | 0.118551333 | 295.9731368 |
| 29 | I12 | 24573 | CG10990 | 31.64882333 | 0.087129333 | 363.2395902 |
| 29 | I13 | 33321 | CG4629  | 39.62801333 | 0.104871667 | 377.8714937 |
| 29 | I14 | 24580 | CG11275 | 31.55716667 | 0.097076    | 325.0769157 |
| 29 | I15 | 33289 | CG40297 | 33.55697667 | 0.090976333 | 368.8539144 |
| 29 | I16 | 24574 | CG12199 | 42.10401333 | 0.091074667 | 462.3021404 |
| 29 | I17 | 33305 | CG4116  | 36.78037333 | 0.079224    | 464.257969  |

|    |     |       |                |             |             |             |
|----|-----|-------|----------------|-------------|-------------|-------------|
| 29 | I18 | 24576 | CG12311        | 30.93142667 | 0.092189    | 335.5218808 |
| 29 | I19 | 33329 | CG4998         | 39.64837    | 0.097521667 | 406.5596021 |
| 29 | I20 | 24593 | CG12058        | 34.10538333 | 0.078658667 | 433.5871021 |
| 29 | I21 | 33316 | CG4450         | 41.11721333 | 0.081836333 | 502.432253  |
| 29 | I22 | 24596 | CG12140        | 30.88355667 | 0.081163    | 380.5127542 |
| 29 | I23 | 33298 | CG40394        | 36.12239667 | 0.068502    | 527.3188617 |
| 29 | I24 | 24611 | CG12286        | 34.39578    | 0.067653333 | 508.4121994 |
| 29 | J01 | 19594 | CG6737         | 42.67912667 | 0.150045    | 284.4421785 |
| 29 | J02 | 33040 | CG14177        | 30.73206333 | 0.130204    | 236.0301015 |
| 29 | J03 | 19522 | CG5413         | 34.82695333 | 0.109797    | 317.1940338 |
| 29 | J04 | 33056 | CG14274        | 34.87817667 | 0.132183667 | 263.8614705 |
| 29 | J05 | 19529 | CG5107         | 32.22829    | 0.114611667 | 281.1955444 |
| 29 | J06 | 33001 | CG13459        | 32.3473     | 0.11199     | 288.8409679 |
| 29 | J07 | 19533 | CG5387         | 35.54784    | 0.115509333 | 307.7486379 |
| 29 | J08 | 33049 | CG14221        | 40.12336    | 0.119882    | 334.6904456 |
| 29 | J09 | 19530 | CG3983,CG5184  | 31.51350333 | 0.122603    | 257.0369676 |
| 29 | J10 | 33065 | CG14369        | 40.30282333 | 0.102489667 | 393.2379199 |
| 29 | J11 | 19538 | CG5034         | 53.41163667 | 0.088903333 | 600.7832852 |
| 29 | J12 | 33009 | CG1381         | 40.17276667 | 0.132144667 | 304.0059632 |
| 29 | J13 | 19539 | CG5059         | 38.00381667 | 0.093199333 | 407.7691901 |
| 29 | J14 | 33033 | CG14125        | 32.62820667 | 0.094796    | 344.1939182 |
| 29 | J15 | 19531 | CG13503,CG5303 | 30.12532667 | 0.086794333 | 347.0886348 |
| 29 | J16 | 33044 | CG14184        | 35.87797    | 0.069898    | 513.290366  |
| 29 | J17 | 19536 | CG4139         | 28.86700667 | 0.080498667 | 358.6022957 |
| 29 | J18 | 33090 | CG15153        | 29.19726667 | 0.093254667 | 313.0917488 |
| 29 | J19 | 32983 | CG13198        | 35.26639333 | 0.076803    | 459.1798931 |
| 29 | J20 | 33073 | CG14696        | 28.72120333 | 0.082689333 | 347.3386733 |
| 29 | J21 | 32993 | CG13310        | 36.71769667 | 0.090184667 | 407.1390185 |
| 29 | J22 | 33087 | CG15033        | 30.45658    | 0.072748667 | 418.6548207 |
| 29 | J23 | 32977 | CG13116        | 32.78219    | 0.077664333 | 422.1009644 |
| 29 | J24 | 33081 | CG14817        | 44.80072    | 0.088419333 | 506.6846617 |
| 29 | K02 | 33345 | CG5400         | 36.70449333 | 0.121322667 | 302.536157  |
| 29 | K03 | 22005 | CG17204        | 33.47681    | 0.109858667 | 304.7261633 |
| 29 | K04 | 33353 | CG5504         | 31.82248    | 0.103223    | 308.2886566 |
| 29 | K05 | 21982 | CG17228        | 36.95067    | 0.094787667 | 389.8257157 |
| 29 | K06 | 24590 | CG11134        | 28.74768667 | 0.106316333 | 270.3976498 |
| 29 | K07 | 33336 | CG5279         | 32.60346    | 0.114551667 | 284.6179453 |
| 29 | K08 | 24589 | CG11070        | 28.90372    | 0.108749    | 265.7837773 |
| 29 | K09 | 33266 | CG3830         | 33.09330333 | 0.118671    | 278.8659684 |
| 29 | K1  | 32969 | CG13065        | 28.70773667 | 0.085764333 | 334.7281504 |
| 29 | K10 | 24591 | CG11203        | 25.30595667 | 0.083499333 | 303.067769  |
| 29 | K11 | 33282 | CG40263        | 28.45861333 | 0.088003667 | 323.3798592 |
| 29 | K12 | 24595 | CG12125        | 32.75309667 | 0.104343333 | 313.8973581 |
| 29 | K13 | 33322 | CG4701         | 29.80308333 | 0.097847    | 304.5886265 |
| 29 | K14 | 24607 | CG12128        | 30.79802667 | 0.084715667 | 363.5458219 |
| 29 | K15 | 33290 | CG40305        | 32.55775667 | 0.080999667 | 401.9492673 |
| 29 | K16 | 24586 | CG12203        | 42.54027667 | 0.083363667 | 510.2975717 |
| 29 | K17 | 33306 | CG4152         | 11.369855   | 0.113765    | 99.94159012 |
| 29 | K18 | 24588 | CG12317        | 26.93378333 | 0.082106667 | 328.0340614 |
| 29 | K19 | 33330 | CG5005         | 30.89928333 | 0.083476    | 370.15769   |
| 29 | K20 | 24605 | CG12065        | 29.67537    | 0.076551    | 387.6548967 |
| 29 | K21 | 33274 | CG40148        | 32.41632333 | 0.073890333 | 438.7085816 |
| 29 | K22 | 24608 | CG12153        | 38.78869667 | 0.061947667 | 626.1526665 |
| 29 | K23 | 33299 | CG40402        | 40.18579333 | 0.066891    | 600.7653247 |

|    |     |       |         |             |             |             |
|----|-----|-------|---------|-------------|-------------|-------------|
| 29 | K24 | 24606 | CG12086 | 29.02068    | 0.063672333 | 455.781632  |
| 29 | L01 | 19641 | CG6719  | 63.18019667 | 0.144848333 | 436.1817303 |
| 29 | L02 | 33018 | CG13955 | 42.22261333 | 0.145151333 | 290.8868445 |
| 29 | L03 | 19534 | CG5445  | 36.88534    | 0.126132    | 292.4344338 |
| 29 | L04 | 32994 | CG13317 | 33.53825667 | 0.117798333 | 284.7090932 |
| 29 | L05 | 19540 | CG5134  | 16.68561667 | 0.100383667 | 166.2184419 |
| 29 | L06 | 33002 | CG13460 | 28.21374    | 0.102008333 | 276.5826975 |
| 29 | L07 | 19532 | CG4079  | 22.67786    | 0.080962667 | 280.1026811 |
| 29 | L08 | 33050 | CG14225 | 29.55324667 | 0.105762    | 279.4316169 |
| 29 | L09 | 19541 | CG5203  | 29.79021667 | 0.097236333 | 306.3691898 |
| 29 | L10 | 33066 | CG14370 | 27.92115333 | 0.082022    | 340.4105403 |
| 29 | L11 | 19550 | CG5043  | 33.54907333 | 0.090141    | 372.1843926 |
| 29 | L12 | 33010 | CG13875 | 27.08066    | 0.100687    | 268.9588527 |
| 29 | L13 | 19551 | CG5068  | 26.16199667 | 0.090194667 | 290.0614597 |
| 29 | L14 | 33034 | CG14147 | 30.58592667 | 0.094428    | 323.9073862 |
| 29 | L15 | 19546 | CG32912 | 29.18390333 | 0.086116    | 338.8906049 |
| 29 | L16 | 33026 | CG1407  | 34.28121333 | 0.083549    | 410.3126708 |
| 29 | L17 | 19547 | CG4153  | 16.62847    | 0.057385667 | 289.7669569 |
| 29 | L18 | 33091 | CG15162 | 25.07079    | 0.076001    | 329.8744753 |
| 29 | L19 | 32984 | CG13203 | 25.85890667 | 0.065136    | 396.9986899 |
| 29 | L20 | 33074 | CG14698 | 29.97869667 | 0.063157333 | 474.6669165 |
| 29 | L21 | 32987 | CG13253 | 32.51809    | 0.096395667 | 337.339749  |
| 29 | L22 | 33088 | CG15046 | 28.99937333 | 0.069973    | 414.436616  |
| 29 | L23 | 32978 | CG13117 | 28.31453333 | 0.077002    | 367.7116612 |
| 29 | L24 | 33082 | CG14856 | 32.50634667 | 0.067100667 | 484.4414859 |
| 29 | M01 | 32970 | CG13067 | 47.32951    | 0.134779667 | 351.1620942 |
| 29 | M02 | 33346 | CG5402  | 38.44195333 | 0.137014333 | 280.5688456 |
| 29 | M03 | 22017 | CG17205 | 34.37611    | 0.101103333 | 340.0096601 |
| 29 | M04 | 33348 | CG5434  | 28.50635667 | 0.107128    | 266.0962276 |
| 29 | M05 | 21994 | CG17241 | 34.40719    | 0.108846    | 316.1089062 |
| 29 | M06 | 24602 | CG11140 | 40.82812333 | 0.098335667 | 415.1914022 |
| 29 | M07 | 33312 | CG4427  | 30.60508333 | 0.099599667 | 307.2809815 |
| 29 | M08 | 24601 | CG11081 | 40.6794     | 0.111024    | 366.4018591 |
| 29 | M09 | 33267 | CG3938  | 7.582766667 | 0.038595    | 196.4701818 |
| 29 | M10 | 24603 | CG11206 | 37.26965333 | 0.108697333 | 342.8755075 |
| 29 | M11 | 33283 | CG40267 | 39.11914    | 0.105393333 | 371.172813  |
| 29 | M12 | 24597 | CG11009 | 38.83212333 | 0.101209    | 383.6825118 |
| 29 | M13 | 33323 | CG4721  | 38.59016667 | 0.094236    | 409.5055676 |
| 29 | M14 | 24604 | CG11299 | 35.29123    | 0.090889667 | 388.2864939 |
| 29 | M15 | 33314 | CG4447  | 38.51042667 | 0.079252    | 485.9237201 |
| 29 | M16 | 24598 | CG32533 | 37.38767    | 0.085581333 | 436.8671128 |
| 29 | M17 | 33310 | CG4396  | 34.92934    | 0.085916667 | 406.5490592 |
| 29 | M18 | 24600 | CG12323 | 6.163064667 | 0.065563333 | 94.0016981  |
| 29 | M19 | 33315 | CG4448  | 46.65882    | 0.095688667 | 487.6107237 |
| 29 | M20 | 24617 | CG12068 | 32.12369333 | 0.072928333 | 440.4830313 |
| 29 | M21 | 33275 | CG40164 | 30.99262333 | 0.083337667 | 371.8921416 |
| 29 | M22 | 24620 | CG12155 | 23.76342333 | 0.075081333 | 316.5024152 |
| 29 | M23 | 33300 | CG40440 | 36.01010333 | 0.079272667 | 454.256238  |
| 29 | M24 | 24250 | CG3081  | 39.51138    | 0.088625667 | 445.823219  |
| 29 | N01 | 19653 | CG6727  | 52.88411333 | 0.145064    | 364.557115  |
| 29 | N02 | 33042 | CG14181 | 46.55731667 | 0.124440667 | 374.1326522 |
| 29 | N03 | 19545 | CG5455  | 43.44721667 | 0.130020333 | 334.1570934 |
| 29 | N04 | 33058 | CG14316 | 42.20481667 | 0.118037333 | 357.5548132 |
| 29 | N05 | 19552 | CG5140  | 42.00609667 | 0.102509333 | 409.7782641 |

|    |     |       |               |             |             |             |
|----|-----|-------|---------------|-------------|-------------|-------------|
| 29 | N06 | 33003 | CG13477       | 42.44275667 | 0.123587333 | 343.4231933 |
| 29 | N07 | 19543 | CG4080        | 32.85937667 | 0.111951667 | 293.5139569 |
| 29 | N08 | 33051 | CG14235       | 41.22193333 | 0.132482667 | 311.1496347 |
| 29 | N09 | 19507 | CG5274        | 48.46968    | 0.119548667 | 405.4389008 |
| 29 | N10 | 33067 | CG14372       | 39.08727    | 0.104403    | 374.3883796 |
| 29 | N11 | 19562 | CG5045        | 47.86911667 | 0.096400333 | 496.5658832 |
| 29 | N12 | 33011 | CG13888       | 45.30238667 | 0.120786333 | 375.0621897 |
| 29 | N13 | 19563 | CG5073        | 28.92965    | 0.099279667 | 291.3955191 |
| 29 | N14 | 33020 | CG14024       | 38.93974333 | 0.090622    | 429.6941508 |
| 29 | N15 | 19558 | CG5532,CG9850 | 37.16846    | 0.072619667 | 511.8236107 |
| 29 | N16 | 33027 | CG14070       | 37.71878    | 0.100036333 | 377.0508049 |
| 29 | N17 | 19559 | CG4158        | 36.31937    | 0.077656667 | 467.6915912 |
| 29 | N18 | 33092 | CG15200       | 34.40242    | 0.082589    | 416.5496616 |
| 29 | N19 | 32985 | CG13225       | 34.82783    | 0.083133    | 418.9410944 |
| 29 | N20 | 33075 | CG14739       | 39.47015333 | 0.083232667 | 474.2146913 |
| 29 | N21 | 32988 | CG13271       | 36.89902    | 0.087291667 | 422.709537  |
| 29 | N22 | 33089 | CG15081       | 39.71809    | 0.083174333 | 477.5282038 |
| 29 | N23 | 32979 | CG13129       | 37.07333    | 0.073846    | 502.035723  |
| 29 | N24 | 33083 | CG14915       | 32.04650667 | 0.069296    | 462.4582467 |
| 29 | O01 | 32971 | CG13072       | 34.35690667 | 0.125973333 | 272.7315834 |
| 29 | O02 | 33347 | CG5404        | 37.10164667 | 0.122259333 | 303.4667837 |
| 29 | O03 | 22028 | CG17186       | 32.29304333 | 0.110947333 | 291.0664219 |
| 29 | O04 | 33355 | CG5526        | 34.21092333 | 0.111763667 | 306.1005813 |
| 29 | O05 | 22014 | CG17848       | 36.10426667 | 0.11032     | 327.2685521 |
| 29 | O06 | 24614 | CG11141       | 32.45852    | 0.117659667 | 275.8678562 |
| 29 | O07 | 33338 | CG5308        | 26.17100667 | 0.102156    | 256.1866818 |
| 29 | O08 | 24613 | CG11095       | 37.45827667 | 0.104363333 | 358.9218116 |
| 29 | O09 | 33268 | CG3956        | 33.97027333 | 0.109411    | 310.4831629 |
| 29 | O10 | 24615 | CG11237       | 30.49534333 | 0.102292333 | 298.1195398 |
| 29 | O11 | 33284 | CG40268       | 34.47024333 | 0.112099667 | 307.4963946 |
| 29 | O12 | 24563 | CG12262       | 37.99224    | 0.122636    | 309.796797  |
| 29 | O13 | 33324 | CG4734        | 38.00469    | 0.110744333 | 343.1750308 |
| 29 | O14 | 24616 | CG11305       | 32.72497    | 0.109149667 | 299.8174067 |
| 29 | O15 | 33292 | CG40328       | 33.34193    | 0.096494333 | 345.5325183 |
| 29 | O16 | 24610 | CG33135       | 32.37048667 | 0.10172     | 318.2312885 |
| 29 | O17 | 33311 | CG4408        | 36.44971667 | 0.083226667 | 437.9571852 |
| 29 | O18 | 24618 | CG12090       | 35.25298    | 0.084927333 | 415.0958074 |
| 29 | O19 | 33332 | CG5142        | 36.00081333 | 0.084816    | 424.4578067 |
| 29 | O20 | 24619 | CG12129       | 39.96870333 | 0.093216333 | 428.7736055 |
| 29 | O21 |       | wtg           | 147.4129    | 0.067154    | 2195.146976 |
| 29 | O22 |       | HFA17794      | 3.464617    | 0.014290667 | 242.4391444 |
| 29 | O23 |       | hpo           | 96.29262667 | 0.070110333 | 1373.444143 |
| 29 | O24 |       | Luc           | 5.377489    | 0.089924    | 59.80037587 |
| 29 | P01 | 19630 | CG6746        | 33.75097333 | 0.135721    | 248.6790794 |
| 29 | P02 | 33043 | CG14182       | 39.84318    | 0.135461333 | 294.1295425 |
| 29 | P03 | 19557 | CG5461        | 20.24104667 | 0.106609    | 189.8624569 |
| 29 | P04 | 33019 | CG13958       | 26.13032    | 0.135212    | 193.2544449 |
| 29 | P05 | 19525 | CG4220        | 27.61443667 | 0.124236333 | 222.2734358 |
| 29 | P06 | 33004 | CG13479       | 34.71646333 | 0.132167333 | 262.6705288 |
| 29 | P07 | 19555 | CG4089        | 33.11110333 | 0.111213667 | 297.7251297 |
| 29 | P08 | 33052 | CG14239       | 38.70241333 | 0.130500333 | 296.5694596 |
| 29 | P09 | 19565 | CG5242        | 28.80596667 | 0.122848667 | 234.4833481 |
| 29 | P10 | 33068 | CG14518       | 34.81313667 | 0.115127    | 302.3889849 |
| 29 | P11 | 19537 | CG4229        | 31.79216    | 0.096516667 | 329.3955448 |

|    |     |       |                 |             |             |             |
|----|-----|-------|-----------------|-------------|-------------|-------------|
| 29 | P12 | 33012 | CG13895         | 32.46898    | 0.118938667 | 272.9892718 |
| 29 | P13 | 19519 | CG5263,CG5280   | 30.01035333 | 0.125155    | 239.7854927 |
| 29 | P14 | 33036 | CG14156         | 32.84389667 | 0.118575    | 276.9883759 |
| 29 | P15 | 19554 | CG5327          | 29.91374333 | 0.099675667 | 300.1107927 |
| 29 | P16 | 33028 | CG14085         | 36.26864667 | 0.092212667 | 393.3152351 |
| 29 | P17 | 19566 | CG5360          | 24.69194333 | 0.115676    | 213.4577901 |
| 29 | P18 | 33084 | CG14933         | 27.40946    | 0.105022    | 260.987793  |
| 29 | P19 | 32986 | CG13230         | 32.71449333 | 0.080333667 | 407.2326671 |
| 29 | P20 | 33076 | CG14748         | 32.94522    | 0.088437    | 372.527562  |
| 29 | P21 |       | wts             | 122.6378    | 0.068774667 | 1783.182761 |
| 29 | P22 |       | HFA17794        | 2.466314667 | 0.012602    | 195.7081945 |
| 29 | P23 |       | hpo             | 81.44046667 | 0.085089667 | 957.1134764 |
| 29 | P24 |       | Luc             | 3.861053    | 0.082898667 | 46.5755742  |
| 30 | A01 |       | DIAP1           | 0.997566667 | 0.012015667 | 83.02216551 |
| 30 | A02 |       | ex/ft           | 95.02202667 | 0.096425667 | 985.4432948 |
| 30 | A03 |       | Luc             | 3.791471    | 0.116132667 | 32.6477563  |
| 30 | A04 |       | hpo             | 77.02650333 | 0.089246667 | 863.0742885 |
| 30 | A05 | 19191 | CG5044          | 28.38286667 | 0.113311    | 250.4864194 |
| 30 | A06 | 24107 | CG6115          | 29.32707    | 0.089997    | 325.8671956 |
| 30 | A07 | 19185 | CG4261          | 44.90109    | 0.112442333 | 399.3254913 |
| 30 | A08 | 25398 | CG12093         | 27.31493333 | 0.098929667 | 276.1045726 |
| 30 | A09 | 19189 | CG4318          | 26.02745667 | 0.097899    | 265.8602914 |
| 30 | A10 | 25389 | CG11041         | 22.27966    | 0.081226667 | 274.2899705 |
| 30 | A11 | 19194 | CG5144          | 25.08354    | 0.084440667 | 297.0552104 |
| 30 | A12 | 25395 | CG11177,CG12175 | 30.62876667 | 0.103454    | 296.0616957 |
| 30 | A13 | 19187 | CG5302          | 25.82208    | 0.092287667 | 279.799901  |
| 30 | A14 | 25392 | CG12677         | 25.39665    | 0.084026333 | 302.2463196 |
| 30 | A15 | 24051 | CG4966          | 27.41283667 | 0.083652333 | 327.6996059 |
| 30 | A16 | 25394 | CG11136         | 26.30801667 | 0.081679333 | 322.0890229 |
| 30 | A17 | 24052 | CG5676          | 29.21717667 | 0.076324667 | 382.8012351 |
| 30 | A18 | 24912 | CG13398         | 25.67089    | 0.091764667 | 279.7469978 |
| 30 | A19 | 24055 | CG5872          | 32.46210667 | 0.080601    | 402.7506689 |
| 30 | A20 | 16635 | CG13978         | 30.58085333 | 0.078994667 | 387.1255443 |
| 30 | A21 | 24068 | CG5941          | 30.59154667 | 0.083521333 | 366.2722498 |
| 30 | A22 | 16640 | CG14066         | 36.84231333 | 0.093615    | 393.5513896 |
| 30 | A23 | 24065 | CG5738          | 16.69378667 | 0.095958333 | 173.9691185 |
| 30 | A24 | 16641 | CG14101         | 33.98368333 | 0.078423667 | 433.3345376 |
| 30 | B01 |       | DIAP1           | 0.997706667 | 0.012944333 | 77.0767131  |
| 30 | B02 |       | ex/ft           | 84.9682     | 0.133536    | 636.2943326 |
| 30 | B03 |       | Luc             | 4.528239333 | 0.115600667 | 39.17139463 |
| 30 | B04 |       | hpo             | 86.08754667 | 0.119105333 | 722.7849858 |
| 30 | B05 | 25104 | CG14585         | 29.54947    | 0.127812667 | 231.1935958 |
| 30 | B06 | 24243 | CG3433          | 26.87123667 | 0.122253667 | 219.7990244 |
| 30 | B07 | 25103 | CG14507,CG14514 | 24.64972    | 0.130355    | 189.0968509 |
| 30 | B08 | 24239 | CG4977          | 32.61781333 | 0.096374    | 338.4503428 |
| 30 | B09 | 18618 | CG6484          | 26.56946667 | 0.102487    | 259.2471891 |
| 30 | B10 | 24245 | CG3592          | 31.55561    | 0.093753333 | 336.581206  |
| 30 | B11 | 18619 | CG6514          | 28.54729333 | 0.104538333 | 273.0796677 |
| 30 | B12 | 24273 | CG4846          | 26.85341333 | 0.099837333 | 268.9716606 |
| 30 | B13 | 18610 | CG6629          | 34.55474333 | 0.104459667 | 330.7950756 |
| 30 | B14 | 19573 | CG6299          | 22.92317333 | 0.101077    | 226.7892135 |
| 30 | B15 | 18612 | CG33092         | 29.22921    | 0.078331    | 373.1499662 |
| 30 | B16 | 19576 | CG6574          | 26.08482667 | 0.086488333 | 301.5993679 |
| 30 | B17 | 18620 | CG6550          | 26.13600333 | 0.081260333 | 321.6329821 |

|    |     |       |                 |             |             |             |
|----|-----|-------|-----------------|-------------|-------------|-------------|
| 30 | B18 | 19567 | CG5538          | 23.10349    | 0.086928333 | 265.7762908 |
| 30 | B19 | 18611 | CG32054         | 24.88021667 | 0.104218333 | 238.7316691 |
| 30 | B20 | 19571 | CG5575          | 21.24302    | 0.090282    | 235.2962938 |
| 30 | B21 | 23187 | CG3040          | 25.63469    | 0.074225    | 345.3646346 |
| 30 | B22 | 19578 | CG6618          | 27.57393    | 0.084575667 | 326.0267532 |
| 30 | B23 | 23188 | CG3099          | 31.03465333 | 0.076928667 | 403.4211781 |
| 30 | B24 | 19569 | CG6693          | 29.83915333 | 0.082615667 | 361.180325  |
| 30 | C01 | 19202 | CG4356          | 38.65993333 | 0.115275    | 335.3713583 |
| 30 | C02 | 24069 | CG6014          | 40.83829333 | 0.092310667 | 442.4005893 |
| 30 | C03 | 19198 | CG5267          | 40.09187333 | 0.115053    | 348.4643889 |
| 30 | C04 | 24084 | CG6163          | 40.68153667 | 0.092621    | 439.2258415 |
| 30 | C05 | 19217 | CG5130          | 37.64038667 | 0.095569    | 393.8556087 |
| 30 | C06 | 24119 | CG6118          | 39.51418333 | 0.102338333 | 386.1132192 |
| 30 | C07 | 19197 | CG4271          | 35.16227333 | 0.107423667 | 327.3233397 |
| 30 | C08 | 25410 | CG11265,CG12112 | 34.20538    | 0.093968    | 364.0109399 |
| 30 | C09 | 19201 | CG4320          | 21.99706667 | 0.0791      | 278.0918668 |
| 30 | C10 | 25401 | CG11044         | 41.23047333 | 0.089000333 | 463.2620103 |
| 30 | C11 | 19280 | CG5255          | 43.25820333 | 0.092035    | 470.0190507 |
| 30 | C12 | 25407 | CG11182         | 36.26121    | 0.099748333 | 363.5269762 |
| 30 | C13 | 19199 | CG5310          | 42.54504667 | 0.093915667 | 453.0133063 |
| 30 | C14 | 25404 | CG12693         | 29.98591    | 0.076901667 | 389.9253592 |
| 30 | C15 | 24078 | CG5808          | 39.22271333 | 0.111589333 | 351.4916002 |
| 30 | C16 | 25412 | CG12253,CG16833 | 35.03315    | 0.085054    | 411.8930327 |
| 30 | C17 | 24064 | CG5694          | 35.99297    | 0.087335667 | 412.1222334 |
| 30 | C18 | 24971 | CG13377         | 35.79682    | 0.076001667 | 471.0004605 |
| 30 | C19 | 24102 | CG31651,CG5827  | 7.986015667 | 0.099100667 | 80.58488338 |
| 30 | C20 | 16647 | CG13990         | 36.42188667 | 0.071895    | 506.5983263 |
| 30 | C21 | 24080 | CG5945          | 38.17780667 | 0.070462    | 541.8212181 |
| 30 | C22 | 16652 | CG14073         | 29.02670667 | 0.079345    | 365.8290588 |
| 30 | C23 | 24077 | CG5746          | 54.41392333 | 0.078841333 | 690.1700039 |
| 30 | C24 | 16644 | CG14222         | 35.74201    | 0.070930333 | 503.9030316 |
| 30 | D01 | 16648 | CG8788          | 52.54539333 | 0.153288333 | 342.7879486 |
| 30 | D02 | 24253 | CG5846          | 39.52731667 | 0.114174    | 346.2024337 |
| 30 | D03 | 16717 | CG14351         | 38.32061    | 0.123476    | 310.3486507 |
| 30 | D04 | 24258 | CG4440          | 34.70217    | 0.108697    | 319.2560052 |
| 30 | D05 | 25116 | CG14597         | 27.7148     | 0.135793    | 204.0959401 |
| 30 | D06 | 24255 | CG32038,CG3448  | 39.84274    | 0.122425    | 325.4461099 |
| 30 | D07 | 25115 | CG14515         | 35.39090667 | 0.101923    | 347.2317992 |
| 30 | D08 | 24260 | CG4706          | 39.23097333 | 0.093059    | 421.5709747 |
| 30 | D09 | 18630 | CG6488          | 34.1539     | 0.099800333 | 342.2223039 |
| 30 | D10 | 24257 | CG3594          | 37.88905333 | 0.099798667 | 379.6549052 |
| 30 | D11 | 18631 | CG6522          | 39.48059667 | 0.088378333 | 446.7225753 |
| 30 | D12 | 24285 | CG31806,CG33179 | 40.78348667 | 0.094047333 | 433.6485174 |
| 30 | D13 | 18622 | CG6630          | 49.57       | 0.096580667 | 513.2497187 |
| 30 | D14 | 19585 | CG6301          | 35.52512    | 0.087126    | 407.7441866 |
| 30 | D15 | 18624 | CG6672          | 34.62874667 | 0.082229    | 421.125718  |
| 30 | D16 | 19587 | CG5939,CG6533   | 38.42652    | 0.084159    | 456.5943036 |
| 30 | D17 | 18632 | CG6554          | 44.25743333 | 0.074322667 | 595.4769294 |
| 30 | D18 | 19579 | CG5545          | 18.84413    | 0.082641667 | 228.0221438 |
| 30 | D19 | 18623 | CG6646          | 35.23428667 | 0.072551667 | 485.6440697 |
| 30 | D20 | 19583 | CG32190         | 31.21433667 | 0.066508    | 469.3320603 |
| 30 | D21 | 23199 | CG32732         | 40.56404333 | 0.087882333 | 461.5722159 |
| 30 | D22 | 19590 | CG6628          | 41.41201    | 0.079780667 | 519.0732508 |
| 30 | D23 | 23200 | CG3108          | 37.57228    | 0.05892     | 637.6829599 |



|    |     |       |                 |             |             |             |
|----|-----|-------|-----------------|-------------|-------------|-------------|
| 30 | D24 | 19581 | CG6694          | 17.10239333 | 0.050353    | 339.6499381 |
| 30 | E01 | 19200 | CG5348          | 83.14206667 | 0.111386667 | 746.4274599 |
| 30 | E02 | 24085 | CG6213          | 30.85280333 | 0.064136333 | 481.0503147 |
| 30 | E03 | 19248 | CG5372          | 53.15464333 | 0.099090667 | 536.4243185 |
| 30 | E04 | 24096 | CG6156,CG6171   | 52.55834333 | 0.110596    | 475.2282482 |
| 30 | E05 | 19229 | CG5131          | 49.63517    | 0.102417333 | 484.6364222 |
| 30 | E06 | 25421 | CG11321         | 54.41018333 | 0.091599333 | 594.0019578 |
| 30 | E07 | 19209 | CG4278          | 48.79074333 | 0.087547    | 557.3091406 |
| 30 | E08 | 25422 | CG12106,CG12118 | 52.15354667 | 0.089596    | 582.0968198 |
| 30 | E09 | 19231 | CG5197          | 58.05987    | 0.089319333 | 650.0257876 |
| 30 | E10 | 25413 | CG11051         | 54.88239333 | 0.099599667 | 551.0298897 |
| 30 | E11 | 19218 | CG5162          | 52.57331333 | 0.092109333 | 570.7707507 |
| 30 | E12 | 25393 | CG11073         | 58.74519667 | 0.088845    | 661.2099349 |
| 30 | E13 | 19211 | CG5313          | 61.85399333 | 0.093768667 | 659.6445863 |
| 30 | E14 | 25416 | CG12698         | 56.00000333 | 0.067187    | 833.4946245 |
| 30 | E15 | 24075 | CG4984          | 51.40633667 | 0.090989667 | 564.9689525 |
| 30 | E16 | 25418 | CG11145         | 53.57329    | 0.079438    | 674.4038118 |
| 30 | E17 | 24076 | CG5699          | 51.80528667 | 0.078373333 | 661.0065498 |
| 30 | E18 | 24936 | CG13404         | 39.03184667 | 0.084009667 | 464.6113741 |
| 30 | E19 | 24079 | CG5882          | 46.39177667 | 0.065822667 | 704.7994105 |
| 30 | E20 | 16659 | CG13995         | 48.34459333 | 0.078695    | 614.3286528 |
| 30 | E21 | 24092 | CG5969,CG5976   | 54.13134333 | 0.082052333 | 659.7172942 |
| 30 | E22 | 16664 | CG14076         | 52.11699    | 0.061448333 | 848.143264  |
| 30 | E23 | 24089 | CG5758          | 47.85112    | 0.068479667 | 698.7639153 |
| 30 | E24 | 16663 | CG14040         | 43.14155333 | 0.078256667 | 551.2827874 |
| 30 | F01 | 16680 | CG14227         | 51.51064667 | 0.121051    | 425.5284687 |
| 30 | F02 | 24265 | CG5860          | 45.83321    | 0.112898667 | 405.9676819 |
| 30 | F03 | 16729 | CG14353         | 53.81642667 | 0.116650667 | 461.3469276 |
| 30 | F04 | 24259 | CG4585          | 37.48738667 | 0.151913333 | 246.7682451 |
| 30 | F05 | 25128 | CG31501         | 45.68653    | 0.133371    | 342.552204  |
| 30 | F06 | 24267 | CG3457          | 46.92372333 | 0.112646333 | 416.5579291 |
| 30 | F07 | 25127 | CG14521         | 43.12914    | 0.090650667 | 475.7730041 |
| 30 | F08 | 24263 | CG4986          | 44.64398333 | 0.101034333 | 441.8694305 |
| 30 | F09 | 18642 | CG6490          | 45.26829    | 0.089264    | 507.1281816 |
| 30 | F10 | 24274 | CG3096          | 40.73631    | 0.096151333 | 423.6686959 |
| 30 | F11 | 18643 | CG6523          | 36.00802667 | 0.093325333 | 385.8333571 |
| 30 | F12 | 24297 | CG31095         | 40.16561    | 0.081764667 | 491.2343147 |
| 30 | F13 | 18634 | CG6632          | 78.83449667 | 0.086862333 | 907.5797718 |
| 30 | F14 | 19597 | CG6304          | 32.35828667 | 0.074038333 | 437.0477455 |
| 30 | F15 | 18636 | CG6673          | 39.96004333 | 0.081321667 | 491.3824934 |
| 30 | F16 | 19600 | CG6577          | 38.51614667 | 0.086775    | 443.8622491 |
| 30 | F17 | 18644 | CG6565          | 44.23537333 | 0.078729    | 561.8688582 |
| 30 | F18 | 19591 | CG5546          | 16.89615667 | 0.056732    | 297.8240969 |
| 30 | F19 | 18635 | CG6649          | 35.03300333 | 0.075269    | 465.4373425 |
| 30 | F20 | 19595 | CG5595          | 33.59315333 | 0.089828333 | 373.9705735 |
| 30 | F21 | 23211 | CG3044          | 40.84791    | 0.066105    | 617.9246653 |
| 30 | F22 | 19602 | CG6633          | 43.45532667 | 0.066035333 | 658.0617447 |
| 30 | F23 | 23222 | CG3014          | 34.34849667 | 0.070122333 | 489.8367615 |
| 30 | F24 | 19589 | CG6596          | 40.51303333 | 0.062017667 | 653.2498804 |
| 30 | G01 | 19226 | CG5008          | 39.75865    | 0.094177    | 422.1694257 |
| 30 | G02 | 24093 | CG6026          | 45.89082    | 0.106393333 | 431.331725  |
| 30 | G03 | 19260 | CG5377          | 45.9148     | 0.099467667 | 461.6052788 |
| 30 | G04 | 24108 | CG13335         | 37.24094    | 0.096810333 | 384.6793903 |
| 30 | G05 | 19241 | CG5133          | 42.55993333 | 0.104020667 | 409.148823  |

|    |     |       |               |             |             |             |
|----|-----|-------|---------------|-------------|-------------|-------------|
| 30 | G06 | 25433 | CG11339       | 37.42338333 | 0.085902667 | 435.6486799 |
| 30 | G07 | 19235 | CG5322        | 42.98822333 | 0.094092    | 456.8743712 |
| 30 | G08 | 25434 | CG12124       | 55.9847     | 0.089386667 | 626.3204803 |
| 30 | G09 | 19243 | CG5204        | 40.98691    | 0.083403667 | 491.4281546 |
| 30 | G10 | 25403 | CG12600       | 66.65181333 | 0.086546333 | 770.1286787 |
| 30 | G11 | 19230 | CG5167        | 44.38236667 | 0.103123    | 430.3828115 |
| 30 | G12 | 25477 | CG11120       | 40.64457667 | 0.088138333 | 461.145283  |
| 30 | G13 | 19272 | CG5379        | 38.55464667 | 0.081066667 | 475.5918586 |
| 30 | G14 | 25402 | CG33041       | 40.10951    | 0.084368667 | 475.4076553 |
| 30 | G15 | 24087 | CG32778       | 49.63842667 | 0.076719    | 647.0160803 |
| 30 | G16 | 25415 | CG31732       | 42.00591333 | 0.081229667 | 517.1252703 |
| 30 | G17 | 24088 | CG5704        | 39.81779667 | 0.078231    | 508.977217  |
| 30 | G18 | 24948 | CG32475       | 48.35542333 | 0.078464    | 616.275277  |
| 30 | G19 | 24091 | CG5895        | 39.61778    | 0.066955667 | 591.7016732 |
| 30 | G20 | 16671 | CG14014       | 39.78356    | 0.073613667 | 540.4371471 |
| 30 | G21 | 24104 | CG5422,CG5986 | 41.74954333 | 0.069598667 | 599.8612521 |
| 30 | G22 | 16676 | CG14077       | 39.69054667 | 0.065185    | 608.890798  |
| 30 | G23 | 24101 | CG5773        | 39.26198333 | 0.078098333 | 502.7249835 |
| 30 | G24 | 16675 | CG14043       | 41.80475333 | 0.065085667 | 642.3035282 |
| 30 | H01 | 16685 | CG8924        | 43.6167     | 0.109578333 | 398.0412795 |
| 30 | H02 | 24277 | CG5866        | 29.10824    | 0.098937333 | 294.2088595 |
| 30 | H03 | 16721 | CG8937        | 30.49419667 | 0.085404    | 357.0581784 |
| 30 | H04 | 24254 | CG3280        | 35.22716    | 0.116085667 | 303.4583081 |
| 30 | H05 | 25140 | CG14606       | 35.71294667 | 0.102262    | 349.2298866 |
| 30 | H06 | 24300 | CG5756        | 39.40082    | 0.099283    | 396.8536406 |
| 30 | H07 | 25187 | CG14584       | 44.26638    | 0.086090333 | 514.185255  |
| 30 | H08 | 24275 | CG5619        | 37.07301333 | 0.103424    | 358.45658   |
| 30 | H09 | 18654 | CG6501        | 25.57631333 | 0.135447    | 188.8289392 |
| 30 | H10 | 24281 | CG3610        | 33.34241667 | 0.085638    | 389.3413749 |
| 30 | H11 | 18655 | CG31390       | 13.0769     | 0.081377667 | 160.693966  |
| 30 | H12 | 24309 | CG4891        | 37.23655333 | 0.085202    | 437.0384889 |
| 30 | H13 | 18646 | CG6637        | 36.02221667 | 0.092688333 | 388.6380882 |
| 30 | H14 | 19609 | CG6310        | 38.82949333 | 0.076519333 | 507.4468326 |
| 30 | H15 | 18648 | CG6674        | 36.3479     | 0.079996667 | 454.367682  |
| 30 | H16 | 19612 | CG6578        | 38.17185333 | 0.078305333 | 487.4745015 |
| 30 | H17 | 18656 | CG6598        | 41.52551    | 0.065685667 | 632.185256  |
| 30 | H18 | 19568 | CG6660        | 31.50741333 | 0.062148333 | 506.9711711 |
| 30 | H19 | 18647 | CG6650        | 36.03763667 | 0.065533    | 549.9158694 |
| 30 | H20 | 19632 | CG6281        | 34.48843    | 0.067209667 | 513.1468688 |
| 30 | H21 | 23223 | CG3052        | 37.25533667 | 0.097121333 | 383.5958114 |
| 30 | H22 | 19640 | CG6690        | 34.19442    | 0.063445333 | 538.9587887 |
| 30 | H23 | 23234 | CG3018        | 60.4611     | 0.177255333 | 341.0960836 |
| 30 | H24 | 19601 | CG6599        | 40.39601667 | 0.067021667 | 602.730709  |
| 30 | I01 | 19224 | CG5362        | 43.68639333 | 0.108265    | 403.5135393 |
| 30 | I02 | 24105 | CG6040        | 39.16135333 | 0.100768333 | 388.6275781 |
| 30 | I03 | 19234 | CG5277        | 32.49129333 | 0.171474333 | 189.4819633 |
| 30 | I04 | 24120 | CG6184        | 30.11675667 | 0.100521333 | 299.6056227 |
| 30 | I05 | 19239 | CG5065        | 32.79524333 | 0.099825667 | 328.5251622 |
| 30 | I06 | 25445 | CG11340       | 30.87571    | 0.086146667 | 358.4086442 |
| 30 | I07 | 19244 | CG5246        | 39.74099333 | 0.0968      | 410.5474518 |
| 30 | I08 | 25446 | CG12131       | 35.47078333 | 0.119982    | 295.6342062 |
| 30 | I09 | 19255 | CG5205        | 53.51667667 | 0.099579    | 537.4293442 |
| 30 | I10 | 25437 | CG11064       | 34.58246333 | 0.088820667 | 389.3515398 |
| 30 | I11 | 19271 | CG5344        | 34.95296    | 0.093948333 | 372.0444925 |

|    |     |       |                 |             |             |             |
|----|-----|-------|-----------------|-------------|-------------|-------------|
| 30 | I12 | 25443 | CG11205,CG30383 | 37.48863333 | 0.089871333 | 417.1367214 |
| 30 | I13 | 24086 | CG4951          | 38.66487    | 0.099399333 | 388.9852045 |
| 30 | I14 | 25440 | CG13298         | 62.8037     | 0.136845    | 458.940407  |
| 30 | I15 | 24099 | CG5620          | 34.18370333 | 0.085114667 | 401.6194232 |
| 30 | I16 | 24923 | CG30485         | 33.55398    | 0.084044333 | 399.2414321 |
| 30 | I17 | 24100 | CG5708          | 32.58256333 | 0.092262    | 353.15258   |
| 30 | I18 | 24960 | CG13409         | 33.85848667 | 0.081917    | 413.3267413 |
| 30 | I19 | 24103 | CG31184,CG33108 | 30.27268    | 0.077855333 | 388.8324499 |
| 30 | I20 | 16683 | CG14015         | 33.94529667 | 0.082165333 | 413.1340468 |
| 30 | I21 | 24116 | CG5994          | 20.88997333 | 0.076826333 | 271.9116275 |
| 30 | I22 | 16643 | CG14200         | 35.55849333 | 0.076227    | 466.4816054 |
| 30 | I23 | 24138 | CG5867          | 34.23466667 | 0.069128    | 495.2358909 |
| 30 | I24 | 16687 | CG14045         | 40.90919    | 0.078679667 | 519.946153  |
| 30 | J01 | 16684 | CG8818          | 35.19400333 | 0.153768    | 228.8772913 |
| 30 | J02 | 24280 | CG3570          | 35.96541667 | 0.139889333 | 257.099064  |
| 30 | J03 | 25162 | CG14506         | 26.60117333 | 0.102735667 | 258.9283177 |
| 30 | J04 | 24304 | CG3578          | 26.52506333 | 0.120282333 | 220.523352  |
| 30 | J05 | 25152 | CG14618         | 33.14577    | 0.115181    | 287.7711602 |
| 30 | J06 | 24291 | CG3494          | 29.13919667 | 0.098753    | 295.0715084 |
| 30 | J07 | 25151 | CG14549         | 28.21479    | 0.098880667 | 285.3418262 |
| 30 | J08 | 24287 | CG5623          | 28.97785333 | 0.105776    | 273.9548984 |
| 30 | J09 | 18666 | CG6502          | 38.55977    | 0.105043333 | 367.0844096 |
| 30 | J10 | 24331 | CG4680          | 37.42931333 | 0.103301667 | 362.330198  |
| 30 | J11 | 18667 | CG31852         | 36.60547333 | 0.093567333 | 391.2206539 |
| 30 | J12 | 19584 | CG6265          | 34.84008    | 0.084972333 | 410.0167506 |
| 30 | J13 | 18658 | CG6638,CG6831   | 38.53753667 | 0.091813    | 419.7394341 |
| 30 | J14 | 19621 | CG31147,CG6325  | 33.28721667 | 0.096941667 | 343.3736783 |
| 30 | J15 | 18660 | CG30281         | 35.20890667 | 0.097211    | 362.1905614 |
| 30 | J16 | 19624 | CG6585          | 35.55027    | 0.085853    | 414.0830256 |
| 30 | J17 | 18668 | CG6605          | 30.61841    | 0.076932667 | 397.9897139 |
| 30 | J18 | 19611 | CG6547          | 30.7658     | 0.07021     | 438.1968381 |
| 30 | J19 | 18659 | CG6654          | 32.84644    | 0.088633333 | 370.5878902 |
| 30 | J20 | 19644 | CG6283          | 27.14362667 | 0.077277333 | 351.2495255 |
| 30 | J21 | 23235 | CG3057          | 32.20149667 | 0.080290667 | 401.0615182 |
| 30 | J22 | 19626 | CG6640          | 26.04566333 | 0.079376333 | 328.1288293 |
| 30 | J23 | 23246 | CG3022          | 30.43213    | 0.073656667 | 413.1619224 |
| 30 | J24 | 19613 | CG6600          | 31.75409    | 0.06573     | 483.0988894 |
| 30 | K02 | 24117 | CG6042          | 40.39032667 | 0.096838667 | 417.088835  |
| 30 | K03 | 19246 | CG5278          | 27.67398667 | 0.108015333 | 256.2042426 |
| 30 | K04 | 24132 | CG6185          | 36.33793667 | 0.109925667 | 330.5682628 |
| 30 | K05 | 19251 | CG5067          | 29.31055    | 0.112579333 | 260.354624  |
| 30 | K06 | 25468 | CG11271         | 36.67929667 | 0.111113    | 330.1080582 |
| 30 | K07 | 19245 | CG4311          | 28.90532333 | 0.139909333 | 206.6003936 |
| 30 | K08 | 25390 | CG3915          | 28.55859333 | 0.089553333 | 318.9003946 |
| 30 | K09 | 19249 | CG4334          | 31.02235667 | 0.081297333 | 381.5913191 |
| 30 | K1  | 19250 | CG5030          | 33.99064333 | 0.084846667 | 400.6125953 |
| 30 | K10 | 25432 | CG11249         | 32.42062667 | 0.083259667 | 389.3917423 |
| 30 | K11 | 19254 | CG5183          | 12.55771333 | 0.107307667 | 117.0253135 |
| 30 | K12 | 25455 | CG11218         | 26.23181667 | 0.091348    | 287.1635577 |
| 30 | K13 | 24054 | CG5791          | 34.21323333 | 0.083066333 | 411.8784586 |
| 30 | K14 | 25462 | CG12534         | 30.11609667 | 0.086184    | 349.4395325 |
| 30 | K15 | 24111 | CG5632          | 31.26146667 | 0.086059    | 363.2562157 |
| 30 | K16 | 24935 | CG13359         | 31.45512667 | 0.100237    | 313.8075428 |
| 30 | K17 | 24112 | CG5714          | 26.07953333 | 0.071984333 | 362.2945734 |

|    |     |       |                 |             |             |             |
|----|-----|-------|-----------------|-------------|-------------|-------------|
| 30 | K18 | 24983 | CG13379         | 34.35592    | 0.068898667 | 498.6441924 |
| 30 | K19 | 24115 | CG5929          | 30.60863    | 0.065740333 | 465.5989474 |
| 30 | K20 | 16666 | CG14173         | 30.67725667 | 0.076454333 | 401.2494169 |
| 30 | K21 | 24128 | CG18766         | 31.21036667 | 0.061454333 | 507.862749  |
| 30 | K22 | 16700 | CG14080         | 28.36388333 | 0.080848333 | 350.8282999 |
| 30 | K23 | 24125 | CG5780,CG6167   | 30.84727333 | 0.074448    | 414.3465685 |
| 30 | K24 | 16702 | CG14189         | 32.53169667 | 0.066509333 | 489.1297963 |
| 30 | L01 | 16728 | CG14257         | 37.07632    | 0.137285667 | 270.0669407 |
| 30 | L02 | 24292 | CG31245,CG31404 | 38.19906    | 0.128807    | 296.5604354 |
| 30 | L03 | 25174 | CG14508         | 31.44449667 | 0.106437667 | 295.4263998 |
| 30 | L04 | 24306 | CG4553          | 28.57179333 | 0.120322333 | 237.4604327 |
| 30 | L05 | 25164 | CG14629         | 30.03503667 | 0.114385333 | 262.5776906 |
| 30 | L06 | 24303 | CG3517          | 26.36533    | 0.097177    | 271.3124505 |
| 30 | L07 | 18653 | CG6461          | 30.34101333 | 0.094670667 | 320.4901201 |
| 30 | L08 | 24299 | CG5653          | 30.06262333 | 0.104019667 | 289.0090335 |
| 30 | L09 | 18678 | CG6506          | 37.731      | 0.105957667 | 356.0950442 |
| 30 | L10 | 24310 | CG3213          | 32.34472    | 0.096656333 | 334.6363232 |
| 30 | L11 | 18679 | CG6538          | 22.61119333 | 0.072957    | 309.924933  |
| 30 | L12 | 19596 | CG6276          | 25.48615    | 0.080770667 | 315.5372    |
| 30 | L13 | 18670 | CG6639          | 31.65242333 | 0.088465    | 357.7960022 |
| 30 | L14 | 19633 | CG6329          | 26.40009667 | 0.066872    | 394.7855106 |
| 30 | L15 | 18672 | CG6678          | 29.45276333 | 0.079455    | 370.6848321 |
| 30 | L16 | 19636 | CG6588          | 25.87019    | 0.081289333 | 318.2482737 |
| 30 | L17 | 18680 | CG6615          | 23.87312667 | 0.074900667 | 318.7304964 |
| 30 | L18 | 19592 | CG6665          | 27.60159333 | 0.067058667 | 411.6036704 |
| 30 | L19 | 18671 | CG6656          | 28.84306333 | 0.064773    | 445.2945414 |
| 30 | L20 | 19631 | CG5612          | 26.81382333 | 0.060071667 | 446.3638987 |
| 30 | L21 | 23247 | CG3088          | 31.42187    | 0.075923    | 413.8649685 |
| 30 | L22 | 19638 | CG6642          | 29.11046333 | 0.070812667 | 411.091189  |
| 30 | L23 | 23280 | CG2998          | 6.744092667 | 0.082529667 | 81.71719261 |
| 30 | L24 | 19625 | CG6604          | 29.17027333 | 0.059528    | 490.0260942 |
| 30 | M01 | 19262 | CG5041          | 49.05034333 | 0.135399333 | 362.2642898 |
| 30 | M02 | 24129 | CG6044          | 38.11904667 | 0.106594667 | 357.6074475 |
| 30 | M03 | 19258 | CG5281          | 41.00288667 | 0.100604333 | 407.5658106 |
| 30 | M04 | 24083 | CG32084,CG32086 | 34.75268    | 0.112111667 | 309.9827256 |
| 30 | M05 | 19263 | CG5076          | 34.35042    | 0.103578    | 331.6381857 |
| 30 | M06 | 25469 | CG12054         | 30.80646    | 0.097642333 | 315.5031117 |
| 30 | M07 | 19268 | CG5250          | 28.30710667 | 0.094006333 | 301.1191445 |
| 30 | M08 | 25470 | CG12164         | 34.16321667 | 0.099435333 | 343.5722044 |
| 30 | M09 | 19261 | CG4335          | 33.35869333 | 0.086443333 | 385.9024409 |
| 30 | M10 | 25444 | CG11254         | 29.64171333 | 0.095047    | 311.8637446 |
| 30 | M11 | 19266 | CG5187          | 34.56943667 | 0.094908667 | 364.2389877 |
| 30 | M12 | 25467 | CG11227         | 39.51059333 | 0.092673    | 426.3441707 |
| 30 | M13 | 24110 | CG4954          | 17.38885667 | 0.091804    | 189.4128433 |
| 30 | M14 | 25464 | CG13321         | 30.79655    | 0.071213    | 432.4568548 |
| 30 | M15 | 24123 | CG5644          | 31.61077667 | 0.087143    | 362.7460228 |
| 30 | M16 | 24947 | CG13363         | 39.98657333 | 0.080492    | 496.7769882 |
| 30 | M17 | 24090 | CG5821          | 32.85389    | 0.074907667 | 438.5918219 |
| 30 | M18 | 24984 | CG13423         | 28.44649    | 0.075430667 | 377.1210206 |
| 30 | M19 | 24126 | CG5847          | 32.25773    | 0.081389667 | 396.3369224 |
| 30 | M20 | 16707 | CG31989         | 27.59505    | 0.067626333 | 408.0518437 |
| 30 | M21 | 24134 | CG4962          | 33.12586    | 0.074124    | 446.8979008 |
| 30 | M22 | 16712 | CG14084         | 21.0686     | 0.085871667 | 245.3498438 |
| 30 | M23 | 24137 | CG5783          | 35.97637    | 0.078565333 | 457.916596  |

|    |     |       |                 |             |             |             |
|----|-----|-------|-----------------|-------------|-------------|-------------|
| 30 | M24 | 16711 | CG32169         | 35.80126667 | 0.084342    | 424.4773264 |
| 30 | N01 | 16708 | CG8851          | 37.21467    | 0.134959667 | 275.7466058 |
| 30 | N02 | 24313 | CG5923          | 24.74049    | 0.127930667 | 193.389831  |
| 30 | N03 | 25186 | CG14511         | 34.82535667 | 0.126533    | 275.2274637 |
| 30 | N04 | 24318 | CG4558          | 38.3977     | 0.127409    | 301.3735293 |
| 30 | N05 | 25175 | CG14583         | 29.16538667 | 0.101791    | 286.5222531 |
| 30 | N06 | 24315 | CG3532          | 37.95095333 | 0.116110667 | 326.8515669 |
| 30 | N07 | 18665 | CG6470          | 29.85112667 | 0.108486333 | 275.1602506 |
| 30 | N08 | 24316 | CG3581          | 33.56887    | 0.094584333 | 354.9094106 |
| 30 | N09 | 18690 | CG6510          | 5.651165667 | 0.119457    | 47.3071119  |
| 30 | N10 | 24317 | CG3642          | 67.57129    | 0.094696    | 713.5601293 |
| 30 | N11 | 18691 | CG6539          | 30.21839    | 0.090947333 | 332.2625182 |
| 30 | N12 | 19608 | CG6279,CG6297   | 30.57577667 | 0.084546667 | 361.6437865 |
| 30 | N13 | 18682 | CG6643          | 34.63255667 | 0.104978    | 329.9029955 |
| 30 | N14 | 19645 | CG6332          | 26.4421     | 0.077617333 | 340.6726161 |
| 30 | N15 | 18684 | CG6680          | 30.03117    | 0.084806333 | 354.1147084 |
| 30 | N16 | 19648 | CG6589          | 30.32109667 | 0.081221333 | 373.3144412 |
| 30 | N17 | 18692 | CG6617          | 35.13530333 | 0.076454    | 459.5613484 |
| 30 | N18 | 19639 | CG5571          | 26.91075333 | 0.063004    | 427.1276956 |
| 30 | N19 | 18683 | CG6667          | 27.57524333 | 0.052884667 | 521.4222774 |
| 30 | N20 | 19643 | CG5618          | 26.03129333 | 0.076399    | 340.7281945 |
| 30 | N21 | 23259 | CG3095          | 32.15187667 | 0.079197667 | 405.9699991 |
| 30 | N22 | 19656 | CG6295          | 26.38436    | 0.06999     | 376.9732819 |
| 30 | N23 | 23270 | CG3038          | 33.61152667 | 0.077162667 | 435.5931193 |
| 30 | N24 | 19659 | CG31155,CG31344 | 24.53485667 | 0.056728333 | 432.4973999 |
| 30 | O01 | 19274 | CG31096         | 43.49903    | 0.122639    | 354.691656  |
| 30 | O02 | 24141 | CG6051          | 39.18118333 | 0.121512333 | 322.446144  |
| 30 | O03 | 19259 | CG5342          | 30.9602     | 0.123661    | 250.3634937 |
| 30 | O04 | 24131 | CG6131          | 30.60121667 | 0.122202    | 250.4150232 |
| 30 | O05 | 19275 | CG5078          | 36.29582667 | 0.113164333 | 320.7355674 |
| 30 | O06 | 25465 | CG11110,CG33005 | 34.43694667 | 0.112892    | 305.0432862 |
| 30 | O07 | 19269 | CG4316          | 35.43903    | 0.090203    | 392.8808354 |
| 30 | O08 | 25482 | CG14670,CG31550 | 32.56273667 | 0.104631    | 311.215     |
| 30 | O09 | 19273 | CG4338          | 35.73269667 | 0.096977667 | 368.4631513 |
| 30 | O10 | 25456 | CG11267         | 40.51379667 | 0.122834333 | 329.8246961 |
| 30 | O11 | 19278 | CG5188          | 33.73818333 | 0.095852    | 351.9820487 |
| 30 | O12 | 25484 | CG12448         | 32.74546667 | 0.095811333 | 341.7702847 |
| 30 | O13 | 24122 | CG4957          | 41.41153667 | 0.101849    | 406.5973811 |
| 30 | O14 | 25476 | CG13330         | 29.60715333 | 0.085220667 | 347.4175278 |
| 30 | O15 | 24135 | CG5665          | 36.03322333 | 0.088845667 | 405.5709714 |
| 30 | O16 | 24959 | CG13374         | 37.43872667 | 0.094644333 | 395.5728288 |
| 30 | O17 | 24136 | CG5727,CG5731   | 37.91233    | 0.078608333 | 482.2940316 |
| 30 | O18 | 16715 | CG14219         | 34.84105667 | 0.090843333 | 383.5290427 |
| 30 | O19 | 24139 | CG5935          | 35.91330667 | 0.080317667 | 447.1408117 |
| 30 | O20 | 16719 | CG14020         | 33.67845333 | 0.081331333 | 414.0895268 |
| 30 | O21 |       | wts             | 119.2524333 | 0.062366    | 1912.138558 |
| 30 | O22 |       | HFA17794        | 3.025269333 | 0.014652333 | 206.4701413 |
| 30 | O23 |       | hpo             | 97.06848667 | 0.068521    | 1416.623906 |
| 30 | O24 |       | Luc             | 6.245686667 | 0.076471667 | 81.6732123  |
| 30 | P01 | 16720 | CG8886          | 39.89122333 | 0.135979333 | 293.3623982 |
| 30 | P02 | 24288 | CG5705          | 46.53460667 | 0.146197667 | 318.2992433 |
| 30 | P03 | 25163 | CG14581         | 32.96469667 | 0.1324      | 248.9780715 |
| 30 | P04 | 24302 | CG3349          | 31.36906333 | 0.140487333 | 223.287485  |
| 30 | P05 | 25188 | CG14641         | 57.04635333 | 0.166460667 | 342.7016993 |

|    |     |       |          |             |             |             |
|----|-----|-------|----------|-------------|-------------|-------------|
| 30 | P06 | 24327 | CG3533   | 34.00173    | 0.15161     | 224.2710243 |
| 30 | P07 | 18677 | CG6474   | 12.70368667 | 0.098010667 | 129.615348  |
| 30 | P08 | 24323 | CG5669   | 17.40325667 | 0.116245    | 149.7118729 |
| 30 | P09 | 18702 | CG6512   | 31.50968667 | 0.14128     | 223.0300585 |
| 30 | P10 | 24312 | CG5781   | 29.90303    | 0.108017    | 276.8363313 |
| 30 | P11 | 18703 | CG6540   | 32.34875    | 0.078471667 | 412.2347769 |
| 30 | P12 | 19620 | CG6280   | 31.66589667 | 0.104304    | 303.5923518 |
| 30 | P13 | 18694 | CG6644   | 31.97047    | 0.098648667 | 324.0841572 |
| 30 | P14 | 19635 | CG6563   | 36.01149667 | 0.108628    | 331.5121025 |
| 30 | P15 | 18696 | CG6684   | 24.19329667 | 0.130686333 | 185.1249174 |
| 30 | P16 | 19647 | CG6569   | 31.20476667 | 0.094980333 | 328.5392415 |
| 30 | P17 | 18689 | CG6479   | 18.70559    | 0.077374667 | 241.7534163 |
| 30 | P18 | 19651 | CG5572   | 31.87045667 | 0.071241    | 447.3611637 |
| 30 | P19 | 18701 | CG6480   | 33.79466667 | 0.07467     | 452.5869381 |
| 30 | P20 | 19655 | CG31721  | 29.95413333 | 0.068967    | 434.3255953 |
| 30 | P21 |       | wts      | 110.4771567 | 0.057626333 | 1917.129727 |
| 30 | P22 |       | HFA17794 | 2.384472667 | 0.016146333 | 147.6788951 |
| 30 | P23 |       | hpo      | 88.95428667 | 0.061153333 | 1454.610596 |
| 30 | P24 |       | Luc      | 4.688872333 | 0.075165    | 62.38105945 |
| 31 | A01 |       | DIAP1    | 1.233032    | 0.01457     | 84.62814001 |
| 31 | A02 |       | ex/ft    | 94.25432667 | 0.111744667 | 843.4794203 |
| 31 | A03 |       | Luc      | 4.198872667 | 0.117109    | 35.85439775 |
| 31 | A04 |       | hpo      | 74.93877    | 0.096546667 | 776.1922041 |
| 31 | A05 | 29494 | CG31283  | 27.94402667 | 0.119449667 | 233.9397626 |
| 31 | A06 | 33461 | CG10200  | 26.57673    | 0.08424     | 315.4882479 |
| 31 | A07 | 29580 | CG31347  | 27.79664667 | 0.104336    | 266.4147242 |
| 31 | A08 | 33469 | CG10435  | 27.90919333 | 0.092449667 | 301.8852781 |
| 31 | A09 | 17411 | CG13204  | 25.04015333 | 0.109312667 | 229.0690923 |
| 31 | A10 | 33477 | CG10717  | 23.06059    | 0.107351    | 214.8148597 |
| 31 | A11 | 17412 | CG13231  | 22.68421667 | 0.103743333 | 218.6571025 |
| 31 | A12 | 33485 | CG10880  | 29.0758     | 0.101305    | 287.012487  |
| 31 | A13 | 17413 | CG13255  | 25.51630667 | 0.10185     | 250.5282932 |
| 31 | A14 | 33493 | CG1113   | 27.02377333 | 0.101709    | 265.6969721 |
| 31 | A15 | 17414 | CG13290  | 33.63065    | 0.096115    | 349.9001196 |
| 31 | A16 | 33501 | CG11390  | 28.35813333 | 0.094897    | 298.830662  |
| 31 | A17 | 17422 | CG13190  | 24.61439    | 0.086935667 | 283.1333898 |
| 31 | A18 | 33509 | CG11629  | 26.24208667 | 0.092414    | 283.9622424 |
| 31 | A19 | 33101 | CG15453  | 28.4294     | 0.099163667 | 286.6916982 |
| 31 | A20 | 33525 | CG11802  | 31.38864333 | 0.094495667 | 332.1701877 |
| 31 | A21 | 33117 | CG15829  | 26.83387333 | 0.092124    | 291.2799415 |
| 31 | A22 | 33541 | CG12316  | 26.48797    | 0.084606667 | 313.0719013 |
| 31 | A23 | 33109 | CG15697  | 7.165794333 | 0.119427667 | 60.00112481 |
| 31 | A24 | 33517 | CG11742  | 34.00303    | 0.085338333 | 398.4496612 |
| 31 | B01 |       | DIAP1    | 1.082144667 | 0.013074667 | 82.7665205  |
| 31 | B02 |       | ex/ft    | 91.53925667 | 0.151178667 | 605.5037968 |
| 31 | B03 |       | Luc      | 4.291766333 | 0.133770333 | 32.08309516 |
| 31 | B04 |       | hpo      | 86.20590333 | 0.110716    | 778.6219095 |
| 31 | B05 | 33645 | CG1368   | 33.38455333 | 0.141138    | 236.5383762 |
| 31 | B06 | 33757 | CG15220  | 43.34617    | 0.161403333 | 268.5580843 |
| 31 | B07 | 33653 | CG13872  | 32.18534    | 0.154220667 | 208.6966727 |
| 31 | B08 | 33765 | CG15327  | 28.45098333 | 0.120620667 | 235.8715477 |
| 31 | B09 | 33661 | CG1402   | 29.94195667 | 0.111253    | 269.133926  |
| 31 | B10 | 33773 | CG15515  | 29.38526333 | 0.112024667 | 262.3106518 |
| 31 | B11 | 33669 | CG14191  | 29.21045667 | 0.116226333 | 251.3239111 |

|    |     |       |         |             |             |             |
|----|-----|-------|---------|-------------|-------------|-------------|
| 31 | B12 | 33781 | CG1567  | 29.24729333 | 0.118448    | 246.9209555 |
| 31 | B13 | 33677 | CG14310 | 28.71053667 | 0.120749    | 237.7703887 |
| 31 | B14 | 33789 | CG15905 | 29.40326667 | 0.098482    | 298.5648816 |
| 31 | B15 | 33685 | CG14531 | 29.43645    | 0.104645    | 281.2981987 |
| 31 | B16 | 33797 | CG16764 | 22.26174    | 0.082586333 | 269.5571907 |
| 31 | B17 | 33693 | CG14668 | 30.27045667 | 0.107012333 | 282.8688594 |
| 31 | B18 | 33805 | CG16936 | 27.99660667 | 0.092477333 | 302.740203  |
| 31 | B19 | 33701 | CG14809 | 29.89658333 | 0.086755333 | 344.6080164 |
| 31 | B20 | 33741 | CG15092 | 25.22844    | 0.093037    | 271.1656653 |
| 31 | B21 | 33733 | CG15025 | 28.16897    | 0.088380333 | 318.7244146 |
| 31 | B22 | 33829 | CG17687 | 29.30361667 | 0.087721667 | 334.0522106 |
| 31 | B23 | 33717 | CG14947 | 33.20670333 | 0.106479333 | 311.8605488 |
| 31 | B24 | 33813 | CG17098 | 30.06229    | 0.085287667 | 352.4810934 |
| 31 | C01 | 29495 | CG31312 | 41.86665667 | 0.122510333 | 341.7397988 |
| 31 | C02 | 33533 | CG12094 | 37.82479    | 0.138769    | 272.5737737 |
| 31 | C03 | 29496 | CG31327 | 41.08830333 | 0.127486333 | 322.2957493 |
| 31 | C04 | 33453 | CG10036 | 36.18187    | 0.126659667 | 285.6621287 |
| 31 | C05 | 29506 | CG31285 | 42.8691     | 0.131218    | 326.7013672 |
| 31 | C06 | 33462 | CG10233 | 35.07931333 | 0.123991333 | 282.917462  |
| 31 | C07 | 17416 | CG13861 | 31.69323667 | 0.119048    | 266.2223361 |
| 31 | C08 | 33470 | CG1049  | 29.41514667 | 0.112143333 | 262.2995571 |
| 31 | C09 | 17423 | CG13206 | 37.53804333 | 0.120945    | 310.3728416 |
| 31 | C10 | 33478 | CG10726 | 41.24323667 | 0.192387667 | 214.375679  |
| 31 | C11 | 17467 | CG13138 | 33.15499667 | 0.112293333 | 295.253473  |
| 31 | C12 | 33486 | CG10907 | 35.4715     | 0.108670667 | 326.4128314 |
| 31 | C13 | 17479 | CG13140 | 42.25723    | 0.100812667 | 419.1658786 |
| 31 | C14 | 33494 | CG11139 | 29.24400667 | 0.129336667 | 226.1076261 |
| 31 | C15 | 17442 | CG13907 | 32.81417667 | 0.099305333 | 330.4372038 |
| 31 | C16 | 33502 | CG11421 | 32.98462    | 0.105221667 | 313.4774524 |
| 31 | C17 | 17434 | CG13193 | 35.32255333 | 0.090327667 | 391.0491064 |
| 31 | C18 | 33510 | CG11671 | 31.19861667 | 0.098964667 | 315.2500556 |
| 31 | C19 | 33102 | CG15539 | 32.35545    | 0.080759333 | 400.6403801 |
| 31 | C20 | 33526 | CG11814 | 26.48303    | 0.074607333 | 354.9655083 |
| 31 | C21 | 33118 | CG1587  | 28.87283667 | 0.108823333 | 265.3184366 |
| 31 | C22 | 33542 | CG12363 | 38.04990667 | 0.092652667 | 410.6725477 |
| 31 | C23 | 33110 | CG15699 | 22.58175333 | 0.109564667 | 206.1043402 |
| 31 | C24 | 33540 | CG12304 | 37.11914667 | 0.107227667 | 346.171355  |
| 31 | D01 | 33547 | CG12501 | 49.73138333 | 0.127414    | 390.3133355 |
| 31 | D02 | 33736 | CG1505  | 35.16150667 | 0.150458333 | 233.6959734 |
| 31 | D03 | 33709 | CG14913 | 34.88629    | 0.146866    | 237.5382321 |
| 31 | D04 | 33749 | CG15150 | 40.20148    | 0.135713333 | 296.2235103 |
| 31 | D05 | 33646 | CG13702 | 30.76831333 | 0.131015    | 234.8457301 |
| 31 | D06 | 33758 | CG15221 | 35.47698333 | 0.123269333 | 287.8005614 |
| 31 | D07 | 33654 | CG13881 | 33.37940333 | 0.136937    | 243.7573726 |
| 31 | D08 | 33766 | CG15354 | 39.07263333 | 0.115918333 | 337.0703513 |
| 31 | D09 | 33662 | CG14025 | 42.89941333 | 0.140944    | 304.3720437 |
| 31 | D10 | 33774 | CG1555  | 24.66473333 | 0.115814667 | 212.9672695 |
| 31 | D11 | 33670 | CG14214 | 33.26632667 | 0.109779667 | 303.028126  |
| 31 | D12 | 33782 | CG15708 | 36.13283667 | 0.097544667 | 370.4234983 |
| 31 | D13 | 33678 | CG14314 | 42.47576667 | 0.105782333 | 401.5393245 |
| 31 | D14 | 33790 | CG15920 | 31.02802    | 0.114910667 | 270.0186232 |
| 31 | D15 | 33686 | CG14538 | 26.85780333 | 0.100703667 | 266.7013449 |
| 31 | D16 | 33798 | CG16775 | 38.48494667 | 0.103400333 | 372.1936422 |
| 31 | D17 | 33694 | CG14669 | 34.26314333 | 0.098994333 | 346.112168  |

|    |     |       |                |             |             |             |
|----|-----|-------|----------------|-------------|-------------|-------------|
| 31 | D18 | 33806 | CG16984        | 35.36702667 | 0.082443667 | 428.9841548 |
| 31 | D19 | 33702 | CG14810        | 29.87748333 | 0.088877333 | 336.165389  |
| 31 | D20 | 33742 | CG15111        | 35.39378    | 0.097576667 | 362.7279063 |
| 31 | D21 | 33734 | CG15027        | 32.13353667 | 0.085594667 | 375.4151738 |
| 31 | D22 | 33830 | CG1770         | 30.81834    | 0.083469667 | 369.2160426 |
| 31 | D23 | 33718 | CG14948        | 31.32918    | 0.098386667 | 318.4291232 |
| 31 | D24 | 33814 | CG1712         | 39.90679    | 0.094083667 | 424.1627842 |
| 31 | E01 | 29507 | CG31313        | 59.49439    | 0.102715333 | 579.2162481 |
| 31 | E02 | 33534 | CG12119        | 47.71923667 | 0.102034    | 467.6797603 |
| 31 | E03 | 29508 | CG31329        | 121.8974    | 0.087236    | 1397.329084 |
| 31 | E04 | 33454 | CG10055        | 55.23252333 | 0.106709333 | 517.5978671 |
| 31 | E05 | 29518 | CG31294        | 35.68121    | 0.089460667 | 398.8480226 |
| 31 | E06 | 33463 | CG10257        | 48.52341333 | 0.106844    | 454.1519723 |
| 31 | E07 | 17428 | CG13862        | 37.19928667 | 0.110673    | 336.1188968 |
| 31 | E08 | 33471 | CG10523        | 36.53566    | 0.097401333 | 375.1043107 |
| 31 | E09 | 17435 | CG13208,CG7741 | 37.48579667 | 0.092798    | 403.9504803 |
| 31 | E10 | 33479 | CG1077         | 48.32349    | 0.116363333 | 415.2810736 |
| 31 | E11 | 17436 | CG13244        | 46.72084333 | 0.090670333 | 515.2825805 |
| 31 | E12 | 33487 | CG10912        | 41.9065     | 0.092904    | 451.0731508 |
| 31 | E13 | 17437 | CG13258        | 42.86437333 | 0.095761333 | 447.6167138 |
| 31 | E14 | 33495 | CG11151        | 39.03957667 | 0.076186667 | 512.4200648 |
| 31 | E15 | 17454 | CG13908        | 43.03428    | 0.093437333 | 460.5683667 |
| 31 | E16 | 33503 | CG11423        | 47.86499667 | 0.083442    | 573.6319439 |
| 31 | E17 | 17446 | CG13195        | 39.73801667 | 0.093846667 | 423.4355687 |
| 31 | E18 | 33511 | CG11672        | 39.26986    | 0.078279667 | 501.6610529 |
| 31 | E19 | 33103 | CG15543        | 38.2752     | 0.080552    | 475.1613864 |
| 31 | E20 | 33527 | CG11835        | 47.25657667 | 0.095754    | 493.5206536 |
| 31 | E21 | 33095 | CG15344        | 44.38116333 | 0.080419333 | 551.8718136 |
| 31 | E22 | 33543 | CG12391        | 43.35344    | 0.078278    | 553.8393929 |
| 31 | E23 | 33111 | CG15719        | 39.538      | 0.079983    | 494.3300451 |
| 31 | E24 | 33519 | CG11752        | 45.05276333 | 0.077313667 | 582.7270297 |
| 31 | F01 | 33548 | CG12520        | 39.52253    | 0.129129667 | 306.0685512 |
| 31 | F02 | 33737 | CG15055        | 37.47083333 | 0.140759    | 266.2055949 |
| 31 | F03 | 33710 | CG14919        | 37.65627    | 0.141171667 | 266.7409891 |
| 31 | F04 | 33750 | CG15160        | 41.52120333 | 0.157957667 | 262.8628557 |
| 31 | F05 | 33647 | CG13705        | 39.7819     | 0.110141333 | 361.1895625 |
| 31 | F06 | 33759 | CG1524         | 25.45306667 | 0.112840333 | 225.5670992 |
| 31 | F07 | 33655 | CG13897        | 41.97121    | 0.108829    | 385.6620019 |
| 31 | F08 | 33767 | CG15355        | 41.17278    | 0.114474667 | 359.6671753 |
| 31 | F09 | 33663 | CG14027        | 43.17152    | 0.116091667 | 371.8744096 |
| 31 | F10 | 33775 | CG15570        | 39.78273    | 0.110551667 | 359.8564472 |
| 31 | F11 | 33671 | CG1422         | 39.97180667 | 0.098433333 | 406.0799865 |
| 31 | F12 | 33783 | CG1572         | 38.61248667 | 0.101158333 | 381.7034682 |
| 31 | F13 | 33679 | CG14321        | 38.99525    | 0.100234667 | 389.0395538 |
| 31 | F14 | 33791 | CG1622         | 33.34084333 | 0.108535667 | 307.1878983 |
| 31 | F15 | 33687 | CG14541        | 38.15051    | 0.094442667 | 403.9541803 |
| 31 | F16 | 33799 | CG16786        | 43.88207    | 0.103031667 | 425.9085718 |
| 31 | F17 | 33695 | CG14674        | 35.90748333 | 0.083703667 | 428.9833978 |
| 31 | F18 | 33807 | CG1702         | 34.73039    | 0.097265667 | 357.0673105 |
| 31 | F19 | 33703 | CG14846        | 40.68439333 | 0.079708333 | 510.4158076 |
| 31 | F20 | 33743 | CG15115        | 36.25326667 | 0.090330667 | 401.3395229 |
| 31 | F21 | 33735 | CG15032        | 31.28564333 | 0.07577     | 412.9027759 |
| 31 | F22 | 33831 | CG17752        | 35.40198667 | 0.077840333 | 454.8026088 |
| 31 | F23 | 33719 | CG14949        | 43.83176667 | 0.084729    | 517.317172  |



|    |     |       |                 |             |             |             |
|----|-----|-------|-----------------|-------------|-------------|-------------|
| 31 | F24 | 33815 | CG17150         | 37.11416    | 0.073044333 | 508.1045758 |
| 31 | G01 | 29519 | CG31315         | 49.77854    | 0.109708333 | 453.7352678 |
| 31 | G02 | 33535 | CG12191         | 33.41509    | 0.101051333 | 330.6744097 |
| 31 | G03 | 29520 | CG31335         | 41.75138333 | 0.10694     | 390.4187707 |
| 31 | G04 | 33455 | CG10066         | 43.08317    | 0.101337667 | 425.1446813 |
| 31 | G05 | 29530 | CG31295         | 36.39442667 | 0.122721667 | 296.5607268 |
| 31 | G06 | 33464 | CG10280         | 35.88098    | 0.110687667 | 324.1642098 |
| 31 | G07 | 17440 | CG31163         | 46.56653667 | 0.095959    | 485.2753433 |
| 31 | G08 | 33472 | CG10524         | 31.45516333 | 0.106707667 | 294.7788506 |
| 31 | G09 | 17433 | CG13165         | 38.24690667 | 0.105696    | 361.8576547 |
| 31 | G10 | 33480 | CG1079          | 44.22739333 | 0.097742333 | 452.4896411 |
| 31 | G11 | 17448 | CG13245,CG31820 | 29.97822667 | 0.091712    | 326.8735462 |
| 31 | G12 | 33488 | CG10998         | 34.65635    | 0.083462    | 415.235077  |
| 31 | G13 | 17449 | CG13272         | 31.63954    | 0.088793667 | 356.3265398 |
| 31 | G14 | 33496 | CG11158         | 30.70820667 | 0.085892    | 357.5211506 |
| 31 | G15 | 17450 | CG13840         | 38.72073333 | 0.099549    | 388.9615499 |
| 31 | G16 | 33504 | CG11527         | 37.04989    | 0.081683667 | 453.5777042 |
| 31 | G17 | 17458 | CG13196         | 36.97942    | 0.081568333 | 453.355101  |
| 31 | G18 | 33512 | CG11694         | 39.44219667 | 0.086826    | 454.2671166 |
| 31 | G19 | 33104 | CG15581         | 40.00808333 | 0.087251    | 458.5401122 |
| 31 | G20 | 33528 | CG11953         | 32.93505    | 0.071931333 | 457.8679203 |
| 31 | G21 | 33096 | CG15345         | 33.93042333 | 0.086655333 | 391.5560881 |
| 31 | G22 | 33544 | CG12402         | 38.07523667 | 0.082532    | 461.3390766 |
| 31 | G23 | 33112 | CG15731         | 33.89501    | 0.086733333 | 390.7956572 |
| 31 | G24 | 33520 | CG11755         | 36.377      | 0.070879    | 513.2267667 |
| 31 | H01 | 33725 | CG14984         | 33.05792    | 0.128205667 | 257.850693  |
| 31 | H02 | 33738 | CG15071         | 31.85502667 | 0.120802667 | 263.6947308 |
| 31 | H03 | 33711 | CG1492          | 34.02649    | 0.12886     | 264.0578147 |
| 31 | H04 | 33751 | CG15169         | 31.11463    | 0.118163667 | 263.3180814 |
| 31 | H05 | 33648 | CG13779         | 12.63096667 | 0.099385333 | 127.0908518 |
| 31 | H06 | 33760 | CG15256         | 33.37965    | 0.097157667 | 343.5616678 |
| 31 | H07 | 33656 | CG13904         | 35.93603    | 0.095303    | 377.0713409 |
| 31 | H08 | 33768 | CG15399         | 33.06461667 | 0.111036667 | 297.7810633 |
| 31 | H09 | 33664 | CG14063         | 32.51802667 | 0.084084    | 386.7326324 |
| 31 | H10 | 33776 | CG15578         | 34.6966     | 0.105218    | 329.7591667 |
| 31 | H11 | 33672 | CG14253         | 32.20134667 | 0.091417667 | 352.2442416 |
| 31 | H12 | 33784 | CG15721         | 33.99188    | 0.088311667 | 384.9081473 |
| 31 | H13 | 33680 | CG14326         | 34.45734    | 0.078002333 | 441.7475546 |
| 31 | H14 | 33792 | CG1630          | 34.31007667 | 0.076083    | 450.9558859 |
| 31 | H15 | 33688 | CG14580         | 33.39424333 | 0.078004333 | 428.107541  |
| 31 | H16 | 33800 | CG16820         | 35.21003    | 0.091648667 | 384.1848581 |
| 31 | H17 | 33696 | CG14689         | 29.73189333 | 0.088245    | 336.9243961 |
| 31 | H18 | 33808 | CG17032         | 29.94232667 | 0.072978667 | 410.2887602 |
| 31 | H19 | 33704 | CG14854         | 31.63936    | 0.084879667 | 372.7554695 |
| 31 | H20 | 33744 | CG15118         | 37.15488667 | 0.084308    | 440.7041641 |
| 31 | H21 | 33730 | CG1502          | 38.5786     | 0.077343667 | 498.7945576 |
| 31 | H22 | 33821 | CG17278         | 36.87116    | 0.069664667 | 529.2662947 |
| 31 | H23 | 33720 | CG14950         | 36.97803    | 0.075702333 | 488.4661855 |
| 31 | H24 | 33816 | CG17181         | 36.61958333 | 0.087246667 | 419.7247268 |
| 31 | I01 | 29531 | CG31316         | 47.46567333 | 0.120859    | 392.735943  |
| 31 | I02 | 33536 | CG12210         | 46.06527667 | 0.132205333 | 348.437355  |
| 31 | I03 | 29532 | CG31336         | 42.51955    | 0.126441    | 336.2797668 |
| 31 | I04 | 33456 | CG10073         | 33.83715667 | 0.115265333 | 293.5588324 |
| 31 | I05 | 29542 | CG31296         | 35.32667333 | 0.100492333 | 351.5360044 |

|    |     |       |         |             |             |             |
|----|-----|-------|---------|-------------|-------------|-------------|
| 31 | I06 | 33465 | CG10352 | 37.92031    | 0.110370333 | 343.5733938 |
| 31 | I07 | 17452 | CG13868 | 47.25410667 | 0.103158667 | 458.0720961 |
| 31 | I08 | 33473 | CG10537 | 32.90943333 | 0.107784333 | 305.3266863 |
| 31 | I09 | 17459 | CG13210 | 39.07528333 | 0.110757667 | 352.7998062 |
| 31 | I10 | 33481 | CG10806 | 32.63251333 | 0.093682    | 348.3327996 |
| 31 | I11 | 17460 | CG13247 | 36.17646667 | 0.092278667 | 392.0349954 |
| 31 | I12 | 33489 | CG10999 | 37.66901333 | 0.091509333 | 411.6412169 |
| 31 | I13 | 17461 | CG13278 | 32.56258667 | 0.087208667 | 373.3870487 |
| 31 | I14 | 33497 | CG11258 | 37.25816    | 0.11234     | 331.655332  |
| 31 | I15 | 17462 | CG13842 | 28.14297333 | 0.085762333 | 328.1507422 |
| 31 | I16 | 33505 | CG11560 | 32.73395667 | 0.078711    | 415.8752483 |
| 31 | I17 | 17489 | CG13896 | 35.59341333 | 0.097494667 | 365.0806198 |
| 31 | I18 | 33513 | CG11698 | 34.85804    | 0.086966667 | 400.8206976 |
| 31 | I19 | 33105 | CG15585 | 31.00748    | 0.115333667 | 268.8502056 |
| 31 | I20 | 33529 | CG12007 | 33.93261333 | 0.083744    | 405.1945612 |
| 31 | I21 | 33097 | CG15378 | 34.60346    | 0.098201667 | 352.3714126 |
| 31 | I22 | 33545 | CG12441 | 30.28915333 | 0.078398667 | 386.347812  |
| 31 | I23 | 33113 | CG15733 | 34.64248333 | 0.086698333 | 399.574963  |
| 31 | I24 | 33521 | CG11756 | 33.08372    | 0.070595    | 468.6411219 |
| 31 | J01 | 33726 | CG14985 | 33.42660333 | 0.124050333 | 269.4600041 |
| 31 | J02 | 33739 | CG15082 | 31.31963    | 0.130742667 | 239.5517148 |
| 31 | J03 | 33712 | CG14920 | 36.02322667 | 0.145088333 | 248.284792  |
| 31 | J04 | 33752 | CG15173 | 33.12802    | 0.144661    | 229.0045002 |
| 31 | J05 | 33649 | CG1378  | 30.73619333 | 0.141339667 | 217.4633212 |
| 31 | J06 | 33761 | CG15259 | 27.83507667 | 0.116058    | 239.8376387 |
| 31 | J07 | 33657 | CG13905 | 31.26366333 | 0.115699    | 270.2155017 |
| 31 | J08 | 33769 | CG15422 | 30.01466333 | 0.096047667 | 312.4975793 |
| 31 | J09 | 33665 | CG14069 | 31.97294667 | 0.106147    | 301.2138512 |
| 31 | J10 | 33777 | CG15589 | 35.15044    | 0.119298333 | 294.6431775 |
| 31 | J11 | 33673 | CG1427  | 35.18251    | 0.113532    | 309.8906916 |
| 31 | J12 | 33785 | CG1575  | 36.45385    | 0.120992    | 301.2914077 |
| 31 | J13 | 33681 | CG14411 | 29.47332667 | 0.092496667 | 318.6420412 |
| 31 | J14 | 33793 | CG1636  | 31.64315    | 0.092400333 | 342.4570979 |
| 31 | J15 | 33689 | CG14626 | 36.8745     | 0.096213667 | 383.2563634 |
| 31 | J16 | 33801 | CG16854 | 36.25509667 | 0.091583    | 395.8714681 |
| 31 | J17 | 33697 | CG14720 | 33.18307333 | 0.094668333 | 350.5192514 |
| 31 | J18 | 33809 | CG17044 | 38.89976667 | 0.089906333 | 432.6699268 |
| 31 | J19 | 33705 | CG1488  | 29.30112    | 0.071443333 | 410.1309196 |
| 31 | J20 | 33745 | CG15125 | 32.49734667 | 0.087697667 | 370.5611324 |
| 31 | J21 | 33716 | CG14946 | 30.99072    | 0.081820333 | 378.7655065 |
| 31 | J22 | 33822 | CG17285 | 34.09915333 | 0.084845333 | 401.8978062 |
| 31 | J23 | 33721 | CG14958 | 30.75666333 | 0.077775667 | 395.453548  |
| 31 | J24 | 33828 | CG17645 | 30.86786333 | 0.082183667 | 375.5960836 |
| 31 | K02 | 33537 | CG12239 | 38.24008333 | 0.123578    | 309.440866  |
| 31 | K03 | 29579 | CG31326 | 29.23154333 | 0.134968333 | 216.5807535 |
| 31 | K04 | 33457 | CG10076 | 31.34906667 | 0.131931667 | 237.6159375 |
| 31 | K05 | 29554 | CG31297 | 32.76164333 | 0.121647333 | 269.3165763 |
| 31 | K06 | 33466 | CG10379 | 35.69642333 | 0.104214    | 342.5300184 |
| 31 | K07 | 17464 | CG13871 | 25.91446    | 0.115840667 | 223.707794  |
| 31 | K08 | 33474 | CG10553 | 25.05343    | 0.095341    | 262.7770844 |
| 31 | K09 | 17457 | CG13169 | 27.32645333 | 0.117688333 | 232.1933922 |
| 31 | K1  | 29543 | CG31320 | 27.37963667 | 0.098227667 | 278.7365067 |
| 31 | K10 | 33482 | CG10811 | 22.1503     | 0.129740333 | 170.7279412 |
| 31 | K11 | 17468 | CG13155 | 24.86639667 | 0.093577667 | 265.7300353 |

|    |     |       |                 |             |             |             |
|----|-----|-------|-----------------|-------------|-------------|-------------|
| 31 | K12 | 33490 | CG11000         | 30.97681333 | 0.090316667 | 342.9800332 |
| 31 | K13 | 17480 | CG13157         | 29.74798333 | 0.091019333 | 326.831479  |
| 31 | K14 | 33498 | CG11315         | 30.61372333 | 0.088269333 | 346.821735  |
| 31 | K15 | 17474 | CG31170         | 31.75037    | 0.080883667 | 392.5436532 |
| 31 | K16 | 33506 | CG11575         | 30.31945333 | 0.085901333 | 352.9567255 |
| 31 | K17 | 17482 | CG13200         | 30.45756667 | 0.097151333 | 313.5064195 |
| 31 | K18 | 33514 | CG11735         | 29.21729333 | 0.079218333 | 368.8198439 |
| 31 | K19 | 33106 | CG15649         | 30.60994667 | 0.094414333 | 324.208683  |
| 31 | K20 | 33530 | CG12017         | 30.09647    | 0.081176    | 370.7557653 |
| 31 | K21 | 33098 | CG15385         | 27.72853667 | 0.079328333 | 349.5413997 |
| 31 | K22 | 33546 | CG12488         | 26.21119333 | 0.090637333 | 289.1876048 |
| 31 | K23 | 33114 | CG15734         | 30.43288667 | 0.082908667 | 367.0652043 |
| 31 | K24 | 33522 | CG11757         | 34.79406333 | 0.079000333 | 440.4293231 |
| 31 | L01 | 33727 | CG1499          | 21.70418    | 0.135048333 | 160.7141641 |
| 31 | L02 | 33740 | CG15086         | 26.61692333 | 0.114076    | 233.3262328 |
| 31 | L03 | 33713 | CG14921         | 33.65065667 | 0.139080333 | 241.9512224 |
| 31 | L04 | 33756 | CG15216         | 27.24021    | 0.122626    | 222.1405738 |
| 31 | L05 | 33650 | CG1380          | 29.44982    | 0.131588333 | 223.8026674 |
| 31 | L06 | 33762 | CG15278         | 29.51081333 | 0.123159333 | 239.6149162 |
| 31 | L07 | 33658 | CG13925         | 30.0032     | 0.130948667 | 229.1218442 |
| 31 | L08 | 33770 | CG15433         | 31.97493    | 0.108314333 | 295.2049744 |
| 31 | L09 | 33666 | CG14079         | 33.69750333 | 0.111165667 | 303.1286938 |
| 31 | L10 | 33778 | CG15605         | 30.95256667 | 0.094462333 | 327.6709941 |
| 31 | L11 | 33674 | CG1428          | 29.45046    | 0.11531     | 255.4024803 |
| 31 | L12 | 33786 | CG15754         | 27.90423333 | 0.088830333 | 314.1295578 |
| 31 | L13 | 33682 | CG14421         | 29.74940667 | 0.087164333 | 341.3025205 |
| 31 | L14 | 33794 | CG16739         | 24.31867667 | 0.099186333 | 245.1817287 |
| 31 | L15 | 33690 | CG1463          | 30.24890333 | 0.085460333 | 353.952555  |
| 31 | L16 | 33802 | CG16869         | 32.12077333 | 0.088541667 | 362.7757929 |
| 31 | L17 | 33698 | CG1478          | 31.94803    | 0.094602    | 337.7098793 |
| 31 | L18 | 33810 | CG17048         | 27.49714    | 0.109196    | 251.8145353 |
| 31 | L19 | 33706 | CG14886         | 28.27135333 | 0.081348667 | 347.533088  |
| 31 | L20 | 33820 | CG17258         | 24.24231    | 0.068548    | 353.6545195 |
| 31 | L21 | 33732 | CG15023         | 28.0869     | 0.075272333 | 373.1370977 |
| 31 | L22 | 33823 | CG17286         | 24.74748    | 0.081394    | 304.045507  |
| 31 | L23 | 33722 | CG14969         | 29.13329333 | 0.084774    | 343.6583544 |
| 31 | L24 | 33818 | CG17212         | 35.78073333 | 0.074138    | 482.623396  |
| 31 | M01 | 29588 | CG31281         | 36.23418    | 0.113550667 | 319.101429  |
| 31 | M02 | 33538 | CG12283         | 33.49252667 | 0.128069667 | 261.5180279 |
| 31 | M03 | 29556 | CG3134          | 33.36547667 | 0.119144667 | 280.041714  |
| 31 | M04 | 33458 | CG10091         | 31.41425    | 0.108117333 | 290.5570183 |
| 31 | M05 | 29566 | CG31303         | 31.64983333 | 0.102438    | 308.9657484 |
| 31 | M06 | 33467 | CG10384         | 32.95150333 | 0.108905333 | 302.5701527 |
| 31 | M07 | 17420 | CG13151         | 30.38543    | 0.105113333 | 289.0730323 |
| 31 | M08 | 33475 | CG10561         | 36.39268667 | 0.107311667 | 339.1307562 |
| 31 | M09 | 17483 | CG13226         | 30.14057    | 0.102941    | 292.7946105 |
| 31 | M10 | 33483 | CG10841         | 31.45516333 | 0.100208333 | 313.8976798 |
| 31 | M11 | 17484 | CG13251         | 28.89205667 | 0.091094667 | 317.1651835 |
| 31 | M12 | 33491 | CG11060         | 32.60232333 | 0.117763667 | 276.8453485 |
| 31 | M13 | 17485 | CG32414         | 32.00642    | 0.094847333 | 337.4519755 |
| 31 | M14 | 33499 | CG11318         | 29.53679333 | 0.094345667 | 313.069952  |
| 31 | M15 | 17465 | CG13891,CG17046 | 26.65287333 | 0.080667667 | 330.4034248 |
| 31 | M16 | 33507 | CG11577         | 33.85603667 | 0.085535    | 395.8150075 |
| 31 | M17 | 33100 | CG15431         | 31.08870667 | 0.081894333 | 379.6197539 |

|    |     |       |                |             |             |             |
|----|-----|-------|----------------|-------------|-------------|-------------|
| 31 | M18 | 33515 | CG11738        | 26.50013    | 0.082263    | 322.1391148 |
| 31 | M19 | 33107 | CG15674        | 29.13825667 | 0.085619667 | 340.3220055 |
| 31 | M20 | 33531 | CG12035        | 30.62217333 | 0.075207    | 407.1718501 |
| 31 | M21 | 33099 | CG15388        | 33.03072667 | 0.076134667 | 433.8460798 |
| 31 | M22 | 33524 | CG11783        | 26.27858    | 0.077898    | 337.3460166 |
| 31 | M23 | 33115 | CG15741        | 31.09930667 | 0.079477667 | 391.2961713 |
| 31 | M24 | 33523 | CG11762        | 32.11215333 | 0.075939667 | 422.864028  |
| 31 | N01 | 33728 | CG15005        | 33.54151333 | 0.145489667 | 230.5422378 |
| 31 | N02 | 33826 | CG1751         | 11.71187    | 0.105214333 | 111.3143963 |
| 31 | N03 | 33714 | CG14926        | 31.00856333 | 0.127723667 | 242.7785245 |
| 31 | N04 | 33754 | CG15207        | 24.97861333 | 0.119862667 | 208.393606  |
| 31 | N05 | 33651 | CG13856        | 26.13426    | 0.130575    | 200.1475014 |
| 31 | N06 | 33763 | CG15281        | 50.80329    | 0.117288333 | 433.1487076 |
| 31 | N07 | 33659 | CG13954        | 33.89593667 | 0.114319333 | 296.5022248 |
| 31 | N08 | 33771 | CG15464        | 33.15341333 | 0.113091667 | 293.1552281 |
| 31 | N09 | 33667 | CG14103        | 34.59037667 | 0.121231333 | 285.3253834 |
| 31 | N10 | 33779 | CG15645        | 29.39543667 | 0.098080333 | 299.7077566 |
| 31 | N11 | 33675 | CG14301        | 27.36512333 | 0.094171667 | 290.5876502 |
| 31 | N12 | 33787 | CG15756        | 28.63041333 | 0.095914667 | 298.4988045 |
| 31 | N13 | 33683 | CG14481        | 27.15911667 | 0.083838    | 323.9475735 |
| 31 | N14 | 33795 | CG16741        | 25.67107    | 0.089224667 | 287.7127028 |
| 31 | N15 | 33691 | CG14632        | 27.98021    | 0.084834    | 329.8230662 |
| 31 | N16 | 33803 | CG16910        | 23.26920333 | 0.068803    | 338.2004176 |
| 31 | N17 | 33699 | CG1480         | 28.74064667 | 0.095181333 | 301.9567562 |
| 31 | N18 | 33811 | CG1705         | 26.05820333 | 0.073491667 | 354.5735798 |
| 31 | N19 | 33707 | CG14888        | 27.75942333 | 0.077402667 | 358.6365242 |
| 31 | N20 | 33747 | CG15134        | 16.50408667 | 0.056932    | 289.8912153 |
| 31 | N21 | 33724 | CG14981        | 26.76556    | 0.093753    | 285.490171  |
| 31 | N22 | 33824 | CG17375        | 28.26384667 | 0.083479667 | 338.5716282 |
| 31 | N23 | 33723 | CG14972        | 28.66940667 | 0.077093    | 371.880802  |
| 31 | N24 | 33819 | CG17218        | 28.96153333 | 0.068948333 | 420.046895  |
| 31 | O01 | 29567 | CG31325        | 38.70560667 | 0.144099333 | 268.6036484 |
| 31 | O02 | 33539 | CG12298        | 36.01812333 | 0.145452667 | 247.6277964 |
| 31 | O03 | 29568 | CG31340        | 34.24437    | 0.135991667 | 251.8122679 |
| 31 | O04 | 33460 | CG10128        | 31.00993667 | 0.157499667 | 196.8889035 |
| 31 | O05 | 29578 | CG31308        | 30.58998667 | 0.123359    | 247.9753132 |
| 31 | O06 | 33468 | CG10433        | 32.3149     | 0.145738333 | 221.7323285 |
| 31 | O07 | 17432 | CG30044        | 26.70463667 | 0.118569333 | 225.2238072 |
| 31 | O08 | 33476 | CG10680        | 32.39522    | 0.104723    | 309.3419784 |
| 31 | O09 | 17456 | CG13154,CG8525 | 37.17218    | 0.100456667 | 370.0319873 |
| 31 | O10 | 33484 | CG10851        | 16.94873    | 0.199050667 | 85.14781831 |
| 31 | O11 | 17429 | CG13883        | 32.87232    | 0.134629333 | 244.1690766 |
| 31 | O12 | 33492 | CG11098        | 33.54247333 | 0.115765    | 289.7462388 |
| 31 | O13 | 17441 | CG13884,CG6883 | 36.11591667 | 0.091329667 | 395.4456201 |
| 31 | O14 | 33500 | CG11369        | 33.821      | 0.109293333 | 309.4516286 |
| 31 | O15 | 17498 | CG13857        | 33.66342333 | 0.079946    | 421.0770187 |
| 31 | O16 | 33508 | CG11620        | 31.42759667 | 0.101352667 | 310.0815963 |
| 31 | O17 | 33116 | CG15782        | 34.02882333 | 0.093016    | 365.8383862 |
| 31 | O18 | 33516 | CG11739        | 30.48101    | 0.086126333 | 353.9104571 |
| 31 | O19 | 33108 | CG15685        | 32.65990667 | 0.089875    | 363.3925637 |
| 31 | O20 | 33532 | CG12063        | 33.90411333 | 0.085774    | 395.2726156 |
| 31 | O21 |       | wt             | 125.4715667 | 0.073915    | 1697.511556 |
| 31 | O22 |       | HFA17794       | 3.071039667 | 0.015439667 | 198.905827  |
| 31 | O23 |       | hpo            | 80.89107333 | 0.071618    | 1129.479647 |

|    |     |       |          |             |             |             |
|----|-----|-------|----------|-------------|-------------|-------------|
| 31 | O24 |       | Luc      | 4.876028667 | 0.086305    | 56.49763822 |
| 31 | P01 | 33729 | CG15006  | 36.56174333 | 0.153286667 | 238.5187448 |
| 31 | P02 | 33827 | CG17603  | 9.531330333 | 0.100398667 | 94.93482981 |
| 31 | P03 | 33715 | CG1494   | 32.83829    | 0.133875667 | 245.2894601 |
| 31 | P04 | 33755 | CG15214  | 13.04968333 | 0.125103    | 104.311514  |
| 31 | P05 | 33652 | CG13860  | 36.49112667 | 0.138503667 | 263.4668637 |
| 31 | P06 | 33764 | CG1530   | 30.06198    | 0.134972667 | 222.7264286 |
| 31 | P07 | 33660 | CG14010  | 27.76224333 | 0.117871667 | 235.5294034 |
| 31 | P08 | 33772 | CG15497  | 32.41616333 | 0.133096333 | 243.5541425 |
| 31 | P09 | 33668 | CG1411   | 31.9385     | 0.130727333 | 244.3138645 |
| 31 | P10 | 33780 | CG15663  | 25.22737    | 0.123593333 | 204.1159448 |
| 31 | P11 | 33676 | CG14309  | 33.58147667 | 0.118994667 | 282.209931  |
| 31 | P12 | 33788 | CG15893  | 33.03011667 | 0.110303333 | 299.4480372 |
| 31 | P13 | 33684 | CG14529  | 31.25416667 | 0.104863    | 298.0476113 |
| 31 | P14 | 33796 | CG16743  | 28.88109333 | 0.099018    | 291.6751836 |
| 31 | P15 | 33692 | CG14651  | 29.97570333 | 0.094380333 | 317.605398  |
| 31 | P16 | 33804 | CG16918  | 30.19329    | 0.094214667 | 320.4733516 |
| 31 | P17 | 33700 | CG14808  | 39.86859667 | 0.079294333 | 502.7925072 |
| 31 | P18 | 33812 | CG17097  | 29.32067    | 0.091473333 | 320.5378981 |
| 31 | P19 | 33708 | CG14890  | 30.58265333 | 0.090024    | 339.7166681 |
| 31 | P20 | 33748 | CG15144  | 33.14304    | 0.088655333 | 373.8414685 |
| 31 | P21 |       | wts      | 110.8229    | 0.074842    | 1480.75813  |
| 31 | P22 |       | HFA17794 | 2.384013667 | 0.014227    | 167.569668  |
| 31 | P23 |       | hpo      | 80.50604    | 0.075664333 | 1063.989286 |
| 31 | P24 |       | Luc      | 4.461154667 | 0.081827333 | 54.51912564 |
| 32 | A01 |       | DIAP1    | 0.966160333 | 0.013334333 | 72.45659076 |
| 32 | A02 |       | ex/ft    | 85.27086667 | 0.110371    | 772.5839819 |
| 32 | A03 |       | Luc      | 4.819243333 | 0.118161    | 40.78539733 |
| 32 | A04 |       | hpo      | 86.06115333 | 0.119709333 | 718.9176561 |
| 32 | A05 | 33933 | CG3097   | 28.18433    | 0.105572333 | 266.9670084 |
| 32 | A06 | 34037 | CG4319   | 29.76963    | 0.130845333 | 227.5177054 |
| 32 | A07 | 33941 | CG31083  | 29.49076333 | 0.099662    | 295.9078017 |
| 32 | A08 | 34053 | CG5417   | 28.72833333 | 0.098917    | 290.4286759 |
| 32 | A09 | 33949 | CG31107  | 28.78643333 | 0.128482333 | 224.0497397 |
| 32 | A10 | 34061 | CG5718   | 28.95267    | 0.101636667 | 284.864419  |
| 32 | A11 | 33973 | CG31712  | 23.72395333 | 0.106594667 | 222.562292  |
| 32 | A12 | 34069 | CG5906   | 24.54587667 | 0.090835333 | 270.223885  |
| 32 | A13 | 33981 | CG31897  | 30.05429667 | 0.095909667 | 313.3604538 |
| 32 | A14 | 34085 | CG6234   | 23.92943667 | 0.096105667 | 248.9909024 |
| 32 | A15 | 33989 | CG32063  | 24.89409333 | 0.093903333 | 265.1034042 |
| 32 | A16 | 34093 | CG6579   | 27.66069    | 0.100808667 | 274.3880156 |
| 32 | A17 | 33997 | CG32604  | 32.80788667 | 0.119174    | 275.2939959 |
| 32 | A18 | 34109 | CG7012   | 26.55992    | 0.070175    | 378.4812255 |
| 32 | A19 | 34005 | CG3318   | 27.44080333 | 0.085399    | 321.3246447 |
| 32 | A20 | 34101 | CG6912   | 32.48314333 | 0.095905    | 338.7012495 |
| 32 | A21 | 34021 | CG3823   | 30.47237667 | 0.083122333 | 366.596743  |
| 32 | A22 | 34117 | CG7158   | 32.71914667 | 0.090508333 | 361.5042445 |
| 32 | A23 | 33966 | CG31407  | 35.15963333 | 0.085494667 | 411.2494347 |
| 32 | A24 | 34029 | CG4046   | 6.055483667 | 0.077056667 | 78.58481204 |
| 32 | B01 |       | DIAP1    | 1.068284333 | 0.014340333 | 74.4950838  |
| 32 | B02 |       | ex/ft    | 91.51014    | 0.126036    | 726.0635057 |
| 32 | B03 |       | Luc      | 5.108448333 | 0.13398     | 38.12843957 |
| 32 | B04 |       | hpo      | 78.46127    | 0.133935333 | 585.8145722 |
| 32 | B05 | 34125 | CG7378   | 25.73697    | 0.123136333 | 209.0119894 |

|        |       |         |             |             |             |
|--------|-------|---------|-------------|-------------|-------------|
| 32 B06 | 34221 | CG9080  | 31.26533667 | 0.105584333 | 296.1171954 |
| 32 B07 | 34133 | CG7557  | 29.79462667 | 0.111677667 | 266.7912713 |
| 32 B08 | 34229 | CG9175  | 19.26872    | 0.123245667 | 156.3439959 |
| 32 B09 | 34141 | CG7930  | 31.79665    | 0.120017667 | 264.9330793 |
| 32 B10 | 34237 | CG9249  | 30.83580333 | 0.109920667 | 280.5278049 |
| 32 B11 | 34149 | CG8083  | 35.27417667 | 0.148528333 | 237.4912306 |
| 32 B12 | 34245 | CG9395  | 33.80934667 | 0.112138333 | 301.4967822 |
| 32 B13 | 34157 | CG8202  | 30.10560333 | 0.105404    | 285.6210707 |
| 32 B14 | 34253 | CG9446  | 30.81439333 | 0.104005    | 296.2779995 |
| 32 B15 | 34165 | CG8362  | 30.58545667 | 0.095508667 | 320.2375003 |
| 32 B16 | 34261 | CG9459  | 26.29333333 | 0.098163333 | 267.8528982 |
| 32 B17 | 34173 | CG8549  | 29.95862667 | 0.104020667 | 288.0064859 |
| 32 B18 | 34269 | CG9496  | 26.80084    | 0.084444667 | 317.3775332 |
| 32 B19 | 34181 | CG8677  | 31.65253333 | 0.092240333 | 343.1528507 |
| 32 B20 | 34285 | CG9688  | 29.93364333 | 0.088785    | 337.1475287 |
| 32 B21 | 34197 | CG8884  | 27.16953667 | 0.110086333 | 246.8020856 |
| 32 B22 | 34277 | CG9588  | 31.24522    | 0.084119667 | 371.4377534 |
| 32 B23 | 34205 | CG8989  | 70.73822667 | 0.087083667 | 812.3018859 |
| 32 B24 | 34301 | CG9883  | 31.87161    | 0.087586333 | 363.8879353 |
| 32 C01 | 33832 | CG17753 | 41.46204333 | 0.127126    | 326.1492011 |
| 32 C02 | 34023 | CG3973  | 36.74043667 | 0.099378    | 369.7039251 |
| 32 C03 | 34013 | CG3608  | 36.26837    | 0.119432333 | 303.6729585 |
| 32 C04 | 34046 | CG4814  | 37.67490667 | 0.111656333 | 337.4184477 |
| 32 C05 | 33934 | CG3100  | 34.79191667 | 0.127401667 | 273.088395  |
| 32 C06 | 34038 | CG4342  | 39.04742333 | 0.106307333 | 367.3069591 |
| 32 C07 | 33942 | CG31086 | 26.36358333 | 0.118045    | 223.3350276 |
| 32 C08 | 34054 | CG5524  | 43.08115333 | 0.111805    | 385.3240314 |
| 32 C09 | 33950 | CG31112 | 33.75184333 | 0.116895667 | 288.7347692 |
| 32 C10 | 34062 | CG5747  | 33.81007    | 0.122248667 | 276.5680062 |
| 32 C11 | 33974 | CG31714 | 34.02081333 | 0.117962    | 288.4048535 |
| 32 C12 | 34070 | CG6016  | 29.63493333 | 0.096726    | 306.3802218 |
| 32 C13 | 33982 | CG31909 | 36.16440667 | 0.096718333 | 373.9147008 |
| 32 C14 | 34086 | CG6300  | 31.11484667 | 0.094052    | 330.825997  |
| 32 C15 | 33990 | CG32081 | 31.12792    | 0.107855667 | 288.6071818 |
| 32 C16 | 34094 | CG6623  | 34.37040667 | 0.096712    | 355.3892657 |
| 32 C17 | 33998 | CG32631 | 32.92492333 | 0.098072333 | 335.7208115 |
| 32 C18 | 34110 | CG7014  | 28.92068    | 0.091990333 | 314.3882509 |
| 32 C19 | 34006 | CG33182 | 35.07955    | 0.091250667 | 384.430616  |
| 32 C20 | 34102 | CG6919  | 32.98124667 | 0.094864    | 347.6687328 |
| 32 C21 | 34022 | CG3825  | 17.48162333 | 0.038058667 | 459.3335727 |
| 32 C22 | 34118 | CG7160  | 36.65320667 | 0.091044    | 402.587833  |
| 32 C23 | 33967 | CG31483 | 33.7914     | 0.095596333 | 353.4800847 |
| 32 C24 | 34030 | CG4050  | 35.13472333 | 0.095451333 | 368.0904405 |
| 32 D01 | 34121 | CG7225  | 50.38276333 | 0.159697667 | 315.4884125 |
| 32 D02 | 34213 | CG9023  | 36.05157667 | 0.141574333 | 254.647688  |
| 32 D03 | 34189 | CG8807  | 29.75375667 | 0.157104667 | 189.3881149 |
| 32 D04 | 34220 | CG9065  | 28.97932667 | 0.152993    | 189.4160299 |
| 32 D05 | 34126 | CG7387  | 32.98824667 | 0.144121    | 228.8927128 |
| 32 D06 | 34222 | CG9089  | 35.76655667 | 0.145084    | 246.5230947 |
| 32 D07 | 34134 | CG7573  | 34.06670333 | 0.115643    | 294.585088  |
| 32 D08 | 34230 | CG9181  | 34.04132667 | 0.109940667 | 309.6336206 |
| 32 D09 | 34142 | CG7968  | 30.83055333 | 0.123183    | 250.2825336 |
| 32 D10 | 34238 | CG9252  | 35.27912    | 0.114674333 | 307.6461748 |
| 32 D11 | 34150 | CG8105  | 52.13031333 | 0.120211333 | 433.6555621 |

|    |     |       |         |             |             |             |
|----|-----|-------|---------|-------------|-------------|-------------|
| 32 | D12 | 34246 | CG9398  | 33.91680333 | 0.112174    | 302.3588651 |
| 32 | D13 | 34158 | CG8206  | 36.66423333 | 0.122219333 | 299.9871815 |
| 32 | D14 | 34254 | CG9447  | 35.21078333 | 0.119149667 | 295.5172626 |
| 32 | D15 | 34166 | CG8385  | 8.494717333 | 0.105667    | 80.39139309 |
| 32 | D16 | 34262 | CG9460  | 33.94518    | 0.106129    | 319.8482978 |
| 32 | D17 | 34174 | CG8556  | 34.90485667 | 0.100670333 | 346.7243577 |
| 32 | D18 | 34270 | CG9498  | 30.82338333 | 0.097418667 | 316.4012031 |
| 32 | D19 | 34182 | CG8680  | 33.50815667 | 0.105894333 | 316.4301206 |
| 32 | D20 | 34286 | CG9706  | 26.16673667 | 0.086090333 | 303.9451197 |
| 32 | D21 | 34198 | CG8920  | 35.84630667 | 0.085737333 | 418.0944901 |
| 32 | D22 | 34278 | CG9592  | 32.64480667 | 0.101815333 | 320.6276068 |
| 32 | D23 | 34206 | CG8997  | 31.83383333 | 0.092637    | 343.64059   |
| 32 | D24 | 34302 | CG9894  | 40.15497667 | 0.100470667 | 399.6686595 |
| 32 | E01 | 33833 | CG17818 | 78.83267667 | 0.113531667 | 694.3672984 |
| 32 | E02 | 34024 | CG3984  | 47.42747667 | 0.112550333 | 421.3890378 |
| 32 | E03 | 34014 | CG3641  | 45.62129667 | 0.107223667 | 425.477864  |
| 32 | E04 | 34047 | CG4869  | 47.51053333 | 0.129289    | 367.4754491 |
| 32 | E05 | 33935 | CG31005 | 37.90805667 | 0.100130667 | 378.5858811 |
| 32 | E06 | 34039 | CG4382  | 51.30358667 | 0.120284667 | 426.5180932 |
| 32 | E07 | 33943 | CG31087 | 44.27075    | 0.09691     | 456.8233412 |
| 32 | E08 | 34055 | CG5553  | 37.32439667 | 0.118657667 | 314.5552893 |
| 32 | E09 | 33951 | CG31115 | 44.80382667 | 0.099762333 | 449.1056411 |
| 32 | E10 | 34063 | CG5776  | 48.72515333 | 0.097952333 | 497.437393  |
| 32 | E11 | 33975 | CG31718 | 41.47999333 | 0.112143333 | 369.8837202 |
| 32 | E12 | 34071 | CG6024  | 45.86295333 | 0.096471333 | 475.4049908 |
| 32 | E13 | 33983 | CG31913 | 41.99142667 | 0.090722    | 462.8582556 |
| 32 | E14 | 34087 | CG6380  | 44.96599667 | 0.103753    | 433.3946649 |
| 32 | E15 | 33991 | CG3212  | 40.20072    | 0.090864    | 442.427364  |
| 32 | E16 | 34095 | CG6669  | 51.33099333 | 0.083823    | 612.3736127 |
| 32 | E17 | 33999 | CG32716 | 43.24721333 | 0.087642333 | 493.4511861 |
| 32 | E18 | 34111 | CG7055  | 25.22045    | 0.097734    | 258.0519574 |
| 32 | E19 | 34007 | CG3395  | 9.806210333 | 0.102048667 | 96.09346848 |
| 32 | E20 | 34103 | CG6945  | 42.72089    | 0.072079333 | 592.692635  |
| 32 | E21 | 33957 | CG31264 | 49.01000667 | 0.082572333 | 593.5402899 |
| 32 | E22 | 34119 | CG7219  | 38.52832    | 0.091928333 | 419.1125696 |
| 32 | E23 | 33968 | CG3149  | 44.16514    | 0.075661333 | 583.7214077 |
| 32 | E24 | 34031 | CG4057  | 37.16494333 | 0.071212333 | 521.8891391 |
| 32 | F01 | 34122 | CG7300  | 40.43466333 | 0.131524    | 307.4318249 |
| 32 | F02 | 34214 | CG9024  | 39.28638333 | 0.145232    | 270.5077623 |
| 32 | F03 | 34190 | CG8819  | 37.02258333 | 0.134929    | 274.3856646 |
| 32 | F04 | 34293 | CG9778  | 47.01776    | 0.103610667 | 453.7926597 |
| 32 | F05 | 34127 | CG7434  | 4.019118333 | 0.114757333 | 35.02275817 |
| 32 | F06 | 34223 | CG9090  | 31.21962333 | 0.119676333 | 260.8671444 |
| 32 | F07 | 34135 | CG7627  | 41.16657333 | 0.119172333 | 345.4373358 |
| 32 | F08 | 34231 | CG9198  | 54.11385333 | 0.152008667 | 355.9918952 |
| 32 | F09 | 34143 | CG7974  | 39.55063333 | 0.108479    | 364.5925325 |
| 32 | F10 | 34239 | CG9307  | 34.33084667 | 0.109416667 | 313.7624981 |
| 32 | F11 | 34151 | CG8136  | 36.79713667 | 0.101092333 | 363.9953244 |
| 32 | F12 | 34247 | CG9418  | 29.89177    | 0.078049    | 382.987226  |
| 32 | F13 | 34159 | CG8213  | 39.66406667 | 0.104780667 | 378.5437517 |
| 32 | F14 | 34255 | CG9450  | 40.43458    | 0.096625    | 418.4691332 |
| 32 | F15 | 34167 | CG8400  | 34.18975667 | 0.098014333 | 348.8240495 |
| 32 | F16 | 34263 | CG9469  | 39.55181    | 0.085850667 | 460.7047509 |
| 32 | F17 | 34175 | CG8565  | 38.28144333 | 0.083103    | 460.6505581 |

|    |     |       |         |             |             |             |
|----|-----|-------|---------|-------------|-------------|-------------|
| 32 | F18 | 34271 | CG9514  | 35.53338667 | 0.077895667 | 456.1664106 |
| 32 | F19 | 34183 | CG8694  | 34.77067667 | 0.082878    | 419.5404892 |
| 32 | F20 | 34287 | CG9717  | 38.01831333 | 0.086480667 | 439.6163304 |
| 32 | F21 | 34199 | CG8928  | 28.99256667 | 0.088192667 | 328.7412408 |
| 32 | F22 | 34279 | CG9616  | 33.37473667 | 0.069321667 | 481.447407  |
| 32 | F23 | 34207 | CG8998  | 40.07248    | 0.067074    | 597.4368608 |
| 32 | F24 | 34303 | CG9904  | 39.79367333 | 0.067226    | 591.938734  |
| 32 | G01 | 33834 | CG17819 | 36.38862667 | 0.089146667 | 408.1883039 |
| 32 | G02 | 34028 | CG4033  | 33.06746667 | 0.12828     | 257.775699  |
| 32 | G03 | 34015 | CG3658  | 23.95282    | 0.120666667 | 198.5040331 |
| 32 | G04 | 34048 | CG4884  | 26.39466    | 0.094002333 | 280.7872854 |
| 32 | G05 | 33936 | CG31018 | 34.27645667 | 0.096839333 | 353.9518033 |
| 32 | G06 | 34040 | CG4390  | 31.08973    | 0.101654333 | 305.8377246 |
| 32 | G07 | 33944 | CG31091 | 35.43441333 | 0.091272667 | 388.2259019 |
| 32 | G08 | 34056 | CG5566  | 36.80501333 | 0.088798333 | 414.4786501 |
| 32 | G09 | 33952 | CG31169 | 35.90218333 | 0.103242    | 347.7478481 |
| 32 | G10 | 34064 | CG5803  | 40.74692333 | 0.09546     | 426.8481388 |
| 32 | G11 | 33976 | CG3173  | 98.27613667 | 0.090933    | 1080.753265 |
| 32 | G12 | 34072 | CG6061  | 42.64907667 | 0.08494     | 502.1082725 |
| 32 | G13 | 33984 | CG31918 | 43.46644    | 0.090729333 | 479.0781372 |
| 32 | G14 | 34088 | CG6388  | 36.64954667 | 0.084122    | 435.6713662 |
| 32 | G15 | 33992 | CG32203 | 47.07255333 | 0.081553333 | 577.199624  |
| 32 | G16 | 34096 | CG6730  | 27.19796    | 0.069591    | 390.8258252 |
| 32 | G17 | 34000 | CG32751 | 43.88076    | 0.085838    | 511.2043617 |
| 32 | G18 | 34112 | CG7067  | 40.44594    | 0.082466333 | 490.453963  |
| 32 | G19 | 34008 | CG3410  | 34.81160333 | 0.073006    | 476.8320869 |
| 32 | G20 | 34104 | CG6951  | 29.95818333 | 0.066980667 | 447.2661265 |
| 32 | G21 | 33964 | CG31367 | 32.82744333 | 0.085441667 | 384.2088364 |
| 32 | G22 | 34120 | CG7221  | 33.67572333 | 0.071560667 | 470.5898492 |
| 32 | G23 | 33969 | CG3153  | 34.98006333 | 0.075786667 | 461.5595971 |
| 32 | G24 | 34032 | CG4073  | 37.87585    | 0.064940667 | 583.237776  |
| 32 | H01 | 34123 | CG7328  | 39.05024333 | 0.111868    | 349.0742959 |
| 32 | H02 | 34215 | CG9032  | 39.00813667 | 0.113234667 | 344.4893496 |
| 32 | H03 | 34191 | CG8836  | 36.30506333 | 0.111205333 | 326.4687245 |
| 32 | H04 | 34294 | CG9782  | 36.82881333 | 0.099681    | 369.4667322 |
| 32 | H05 | 34128 | CG7453  | 37.68636    | 0.103505    | 364.1018308 |
| 32 | H06 | 34224 | CG9096  | 19.70548667 | 0.071681333 | 274.9040196 |
| 32 | H07 | 34136 | CG7673  | 37.27593667 | 0.104535    | 356.5880965 |
| 32 | H08 | 34232 | CG9205  | 35.62235    | 0.086417667 | 412.2114305 |
| 32 | H09 | 34144 | CG7975  | 39.98693333 | 0.100856667 | 396.4728823 |
| 32 | H10 | 34240 | CG9322  | 41.26662333 | 0.093397667 | 441.8378403 |
| 32 | H11 | 34152 | CG8138  | 40.03864333 | 0.090333333 | 443.232214  |
| 32 | H12 | 34248 | CG9427  | 40.67725333 | 0.085209    | 477.3821232 |
| 32 | H13 | 34160 | CG8222  | 4.838154333 | 0.081147333 | 59.62185243 |
| 32 | H14 | 34256 | CG9453  | 32.62606667 | 0.092853333 | 351.3720563 |
| 32 | H15 | 34168 | CG8416  | 28.68944333 | 0.076816667 | 373.4794099 |
| 32 | H16 | 34264 | CG9475  | 20.95629667 | 0.084800333 | 247.1251685 |
| 32 | H17 | 34176 | CG8604  | 34.33792667 | 0.080301333 | 427.6134062 |
| 32 | H18 | 34272 | CG9518  | 34.42614    | 0.073262667 | 469.9001765 |
| 32 | H19 | 34184 | CG8713  | 39.26389667 | 0.079079    | 496.5148354 |
| 32 | H20 | 34288 | CG9730  | 35.95120333 | 0.089013    | 403.8871101 |
| 32 | H21 | 34200 | CG8929  | 40.04813    | 0.083002    | 482.495964  |
| 32 | H22 | 34280 | CG9636  | 36.31552    | 0.073279    | 495.5788152 |
| 32 | H23 | 34208 | CG9000  | 35.61449333 | 0.075298    | 472.9806015 |



|    |     |       |         |             |             |             |
|----|-----|-------|---------|-------------|-------------|-------------|
| 32 | H24 | 34304 | CG9914  | 34.65716333 | 0.071528667 | 484.5213108 |
| 32 | I01 | 33835 | CG17835 | 54.52342667 | 0.124424    | 438.2066697 |
| 32 | I02 | 34026 | CG40204 | 39.26982667 | 0.130504333 | 300.9082202 |
| 32 | I03 | 34016 | CG3703  | 39.39276    | 0.119670333 | 329.1773233 |
| 32 | I04 | 34049 | CG4917  | 43.49193667 | 0.134420667 | 323.5509669 |
| 32 | I05 | 33937 | CG31028 | 40.71881333 | 0.131133333 | 310.5145907 |
| 32 | I06 | 34041 | CG4393  | 36.9952     | 0.107925333 | 342.7851354 |
| 32 | I07 | 33945 | CG31098 | 37.18644333 | 0.103383    | 359.6959203 |
| 32 | I08 | 34057 | CG5614  | 38.21095667 | 0.113374333 | 337.0335731 |
| 32 | I09 | 33953 | CG3119  | 34.52237667 | 0.104497667 | 330.365048  |
| 32 | I10 | 34065 | CG5805  | 31.5276     | 0.112211667 | 280.9654373 |
| 32 | I11 | 33977 | CG31757 | 35.21409667 | 0.103724    | 339.498059  |
| 32 | I12 | 34073 | CG6110  | 35.39328333 | 0.103032333 | 343.5162748 |
| 32 | I13 | 33985 | CG3194  | 32.53935667 | 0.115232333 | 282.3804372 |
| 32 | I14 | 34089 | CG6448  | 38.04680667 | 0.095761667 | 397.3072733 |
| 32 | I15 | 33993 | CG32249 | 34.96636    | 0.083895333 | 416.7855185 |
| 32 | I16 | 34097 | CG6734  | 38.66685667 | 0.090958667 | 425.1036002 |
| 32 | I17 | 34001 | CG33048 | 30.88527667 | 0.087998    | 350.9770298 |
| 32 | I18 | 34113 | CG7084  | 34.5306     | 0.086287667 | 400.180018  |
| 32 | I19 | 34009 | CG3450  | 27.61321333 | 0.096571667 | 285.9349361 |
| 32 | I20 | 34105 | CG6954  | 34.14764    | 0.084528667 | 403.9770334 |
| 32 | I21 | 33959 | CG31289 | 31.29823667 | 0.088062    | 355.4113768 |
| 32 | I22 | 34077 | CG6143  | 23.52581667 | 0.072242667 | 325.649893  |
| 32 | I23 | 33970 | CG31542 | 32.58742667 | 0.078216667 | 416.6302152 |
| 32 | I24 | 34033 | CG4111  | 3.915546    | 0.083832333 | 46.70687125 |
| 32 | J01 | 34124 | CG7330  | 41.81169333 | 0.151074333 | 276.7623885 |
| 32 | J02 | 34216 | CG9044  | 32.61827667 | 0.157202333 | 207.4923188 |
| 32 | J03 | 34192 | CG8843  | 28.06255333 | 0.154131667 | 182.0687075 |
| 32 | J04 | 34295 | CG9792  | 36.34653    | 0.133668667 | 271.9151085 |
| 32 | J05 | 34129 | CG7465  | 37.44179    | 0.122247667 | 306.2781566 |
| 32 | J06 | 34225 | CG9099  | 34.0933     | 0.117287    | 290.6826844 |
| 32 | J07 | 34137 | CG7708  | 35.33731667 | 0.109579    | 322.482562  |
| 32 | J08 | 34233 | CG9233  | 38.40950667 | 0.120416    | 318.9734476 |
| 32 | J09 | 34145 | CG7979  | 40.65704    | 0.132862    | 306.0095437 |
| 32 | J10 | 34241 | CG9323  | 24.76270333 | 0.108749667 | 227.7037171 |
| 32 | J11 | 34153 | CG8165  | 42.34706333 | 0.101818    | 415.9094004 |
| 32 | J12 | 34249 | CG9434  | 34.67874    | 0.108147333 | 320.6619981 |
| 32 | J13 | 34161 | CG8229  | 38.47741667 | 0.11515     | 334.1503836 |
| 32 | J14 | 34257 | CG9454  | 34.20570667 | 0.098483667 | 347.323651  |
| 32 | J15 | 34169 | CG8420  | 35.96368    | 0.104185    | 345.1905745 |
| 32 | J16 | 34265 | CG9476  | 48.84413333 | 0.201543    | 242.3509292 |
| 32 | J17 | 34177 | CG8615  | 5.465910333 | 0.098887333 | 55.27412004 |
| 32 | J18 | 34273 | CG9522  | 35.56808667 | 0.090840333 | 391.5450919 |
| 32 | J19 | 34185 | CG8736  | 32.77248333 | 0.093935    | 348.8846898 |
| 32 | J20 | 34289 | CG9746  | 33.95085333 | 0.082784    | 410.1137096 |
| 32 | J21 | 34201 | CG8944  | 28.95160333 | 0.085960333 | 336.801897  |
| 32 | J22 | 34281 | CG9641  | 34.70804667 | 0.080407333 | 431.6527514 |
| 32 | J23 | 34209 | CG9003  | 28.34782667 | 0.079646333 | 355.9213021 |
| 32 | J24 | 34305 | CG9915  | 27.73219667 | 0.088893333 | 311.9716139 |
| 32 | K02 | 34027 | CG40283 | 42.87302    | 0.129927    | 329.9777567 |
| 32 | K03 | 34017 | CG3725  | 29.39897333 | 0.184439333 | 159.3964411 |
| 32 | K04 | 34050 | CG4920  | 24.19456667 | 4.547446333 | 5.320473271 |
| 32 | K05 | 33938 | CG31032 | 30.48306667 | 0.136846333 | 222.7539893 |
| 32 | K06 | 34042 | CG4467  | 25.03419    | 0.108909667 | 229.8619651 |

|    |     |       |         |             |             |             |
|----|-----|-------|---------|-------------|-------------|-------------|
| 32 | K07 | 33946 | CG31099 | 27.41613    | 0.121699667 | 225.2769523 |
| 32 | K08 | 34058 | CG5648  | 33.82727667 | 0.102014667 | 331.5922874 |
| 32 | K09 | 33954 | CG3123  | 30.31810333 | 0.104567667 | 289.937648  |
| 32 | K1  | 33836 | CG17870 | 32.86242667 | 0.097898333 | 335.6791229 |
| 32 | K10 | 34066 | CG5850  | 28.54955    | 0.096832667 | 294.8338715 |
| 32 | K11 | 33978 | CG31773 | 28.24044    | 0.084523    | 334.1154479 |
| 32 | K12 | 34074 | CG6112  | 31.78264667 | 0.095887333 | 331.4582392 |
| 32 | K13 | 33986 | CG3199  | 34.10038333 | 0.102713333 | 331.9956838 |
| 32 | K14 | 34090 | CG6497  | 31.76124    | 0.085341    | 372.1685942 |
| 32 | K15 | 33994 | CG32379 | 30.82975    | 0.093588667 | 329.4175577 |
| 32 | K16 | 34098 | CG6803  | 29.60099667 | 0.084926    | 348.5504635 |
| 32 | K17 | 34002 | CG33071 | 30.15980667 | 0.092876    | 324.7319724 |
| 32 | K18 | 34114 | CG7093  | 37.45748    | 0.084356333 | 444.0387404 |
| 32 | K19 | 34010 | CG3492  | 30.45414333 | 0.087273    | 348.9526352 |
| 32 | K20 | 34106 | CG6965  | 34.29161    | 0.084674333 | 404.9823441 |
| 32 | K21 | 33960 | CG31324 | 29.90823    | 0.081793333 | 365.6560844 |
| 32 | K22 | 34078 | CG6151  | 26.65985333 | 0.08619     | 309.3149244 |
| 32 | K23 | 33971 | CG31560 | 32.57386333 | 0.091305333 | 356.7575096 |
| 32 | K24 | 34034 | CG4151  | 30.69451667 | 0.080368333 | 381.9230211 |
| 32 | L01 | 34196 | CG8874  | 26.34396333 | 0.131770667 | 199.9228205 |
| 32 | L02 | 34217 | CG9047  | 32.78112    | 0.135648667 | 241.6619404 |
| 32 | L03 | 34193 | CG8852  | 27.57894333 | 0.173699667 | 158.7737263 |
| 32 | L04 | 34296 | CG9822  | 27.1474     | 0.146477333 | 185.3351599 |
| 32 | L05 | 34130 | CG7466  | 36.62942    | 0.120530333 | 303.9020883 |
| 32 | L06 | 34226 | CG9101  | 34.21041    | 0.133884667 | 255.5214936 |
| 32 | L07 | 34138 | CG7904  | 28.86177667 | 0.131499    | 219.4828605 |
| 32 | L08 | 34234 | CG9240  | 34.52687    | 0.110134    | 313.4987379 |
| 32 | L09 | 34146 | CG8023  | 33.20626    | 0.126226    | 263.0698905 |
| 32 | L10 | 34242 | CG9336  | 25.20365    | 0.087366    | 288.4835062 |
| 32 | L11 | 34154 | CG8170  | 30.70875667 | 0.105196667 | 291.9175829 |
| 32 | L12 | 34250 | CG9436  | 31.84079333 | 0.107980333 | 294.875857  |
| 32 | L13 | 34162 | CG8238  | 28.32414667 | 0.087878333 | 322.3109223 |
| 32 | L14 | 34258 | CG9455  | 31.66624    | 0.11462     | 276.2715058 |
| 32 | L15 | 34170 | CG8432  | 25.59678333 | 0.085514667 | 299.3262364 |
| 32 | L16 | 34266 | CG9488  | 30.00031    | 0.078818    | 380.6276485 |
| 32 | L17 | 34178 | CG8646  | 32.13996667 | 0.082842    | 387.9670537 |
| 32 | L18 | 34274 | CG9525  | 26.36036    | 0.089273    | 295.2780796 |
| 32 | L19 | 34186 | CG8756  | 31.41670667 | 0.085930667 | 365.6052942 |
| 32 | L20 | 34290 | CG9754  | 30.88777    | 0.073750667 | 418.8134345 |
| 32 | L21 | 34202 | CG8958  | 32.01610667 | 0.083173333 | 384.9323501 |
| 32 | L22 | 34282 | CG9648  | 43.29729333 | 0.076037667 | 569.419016  |
| 32 | L23 | 34210 | CG9009  | 27.45954    | 0.085780667 | 320.11339   |
| 32 | L24 | 34299 | CG9854  | 25.16664667 | 0.072205    | 348.544376  |
| 32 | M01 | 33962 | CG31348 | 38.93708333 | 0.122478    | 317.9108357 |
| 32 | M02 | 34081 | CG6211  | 34.52374333 | 0.123733    | 279.0180739 |
| 32 | M03 | 34018 | CG3760  | 24.19877667 | 0.393066    | 61.56415632 |
| 32 | M04 | 34051 | CG5070  | 29.44611667 | 0.106215333 | 277.2303748 |
| 32 | M05 | 33939 | CG31064 | 32.59042    | 0.119111667 | 273.6123246 |
| 32 | M06 | 34043 | CG4696  | 31.89818667 | 0.109613    | 291.0073319 |
| 32 | M07 | 33947 | CG31101 | 32.46258    | 0.106389    | 305.1309816 |
| 32 | M08 | 34059 | CG5657  | 29.13166667 | 0.119174    | 244.4464956 |
| 32 | M09 | 33955 | CG3125  | 56.97484    | 0.099589667 | 572.0959002 |
| 32 | M10 | 34067 | CG5876  | 31.28322667 | 0.101305    | 308.8023954 |
| 32 | M11 | 33979 | CG31791 | 26.27868667 | 0.087909667 | 298.9282938 |

|        |       |         |             |             |             |
|--------|-------|---------|-------------|-------------|-------------|
| 32 M12 | 34075 | CG6124  | 28.85418333 | 0.092932333 | 310.485945  |
| 32 M13 | 33987 | CG3200  | 32.71069667 | 0.098552    | 331.9130679 |
| 32 M14 | 34091 | CG6518  | 28.65490667 | 0.075357667 | 380.2520425 |
| 32 M15 | 33995 | CG32451 | 29.25899333 | 0.115207    | 253.968885  |
| 32 M16 | 34099 | CG6819  | 23.59473333 | 0.108742333 | 216.9783617 |
| 32 M17 | 34003 | CG33109 | 33.04687    | 0.084136667 | 392.7760786 |
| 32 M18 | 34115 | CG7123  | 28.81666    | 0.081805333 | 352.2589399 |
| 32 M19 | 34011 | CG3590  | 31.35326333 | 0.077036333 | 406.9931937 |
| 32 M20 | 34107 | CG6982  | 28.14894    | 0.076283333 | 369.0051125 |
| 32 M21 | 34020 | CG3805  | 31.25499    | 0.082549333 | 378.6219554 |
| 32 M22 | 34036 | CG4202  | 26.26162    | 0.101713667 | 258.1916557 |
| 32 M23 | 33972 | CG31628 | 28.54422    | 0.081009333 | 352.357177  |
| 32 M24 | 34084 | CG6232  | 32.08574667 | 0.076112    | 421.5596314 |
| 32 N01 | 34204 | CG8961  | 45.79921667 | 0.144961    | 315.9416441 |
| 32 N02 | 34218 | CG9053  | 21.12367667 | 0.169139    | 124.8894499 |
| 32 N03 | 34194 | CG8867  | 32.68754333 | 0.136703667 | 239.112411  |
| 32 N04 | 34297 | CG9843  | 36.77415    | 0.126360667 | 291.0252927 |
| 32 N05 | 34131 | CG7497  | 30.48618333 | 0.126170333 | 241.6271918 |
| 32 N06 | 34227 | CG9156  | 35.616      | 0.121792333 | 292.4322002 |
| 32 N07 | 34139 | CG7905  | 22.69521333 | 0.112756    | 201.2772122 |
| 32 N08 | 34235 | CG9245  | 33.65433667 | 0.127279    | 264.4138991 |
| 32 N09 | 34147 | CG8048  | 24.65677667 | 0.104161667 | 236.7164184 |
| 32 N10 | 34243 | CG9350  | 35.58148    | 0.106922    | 332.7797834 |
| 32 N11 | 34155 | CG8171  | 13.33886    | 0.184200667 | 72.4148302  |
| 32 N12 | 34251 | CG9438  | 34.03739333 | 0.111981333 | 303.9559569 |
| 32 N13 | 34163 | CG8257  | 35.8547     | 0.104586333 | 342.8239509 |
| 32 N14 | 34259 | CG9456  | 29.51811667 | 0.090779333 | 325.1633999 |
| 32 N15 | 34171 | CG8472  | 20.34201    | 0.076363333 | 266.3845214 |
| 32 N16 | 34267 | CG9490  | 28.13475333 | 0.076550667 | 367.5311341 |
| 32 N17 | 34179 | CG8664  | 30.7078     | 0.083410667 | 368.151955  |
| 32 N18 | 34275 | CG9550  | 29.27381    | 0.084318333 | 347.1820284 |
| 32 N19 | 34187 | CG8779  | 27.06417333 | 0.08731     | 309.977933  |
| 32 N20 | 34291 | CG9757  | 26.06900333 | 0.099170333 | 262.8709863 |
| 32 N21 | 34203 | CG8959  | 33.31586333 | 0.076882    | 433.3376256 |
| 32 N22 | 34283 | CG9652  | 29.64926    | 0.085777    | 345.655129  |
| 32 N23 | 34211 | CG9018  | 34.93970667 | 0.092752    | 376.7003048 |
| 32 N24 | 34300 | CG9876  | 28.14042    | 0.067311333 | 418.0636247 |
| 32 O01 | 33963 | CG31350 | 36.14848    | 0.130525667 | 276.9453773 |
| 32 O02 | 34082 | CG6215  | 42.69197    | 0.142852667 | 298.8531541 |
| 32 O03 | 34019 | CG3777  | 34.66236667 | 0.130345667 | 265.926498  |
| 32 O04 | 34052 | CG5282  | 35.01513333 | 0.140762    | 248.7541619 |
| 32 O05 | 33940 | CG31069 | 14.90574667 | 0.141996    | 104.9730039 |
| 32 O06 | 34044 | CG4741  | 32.46951667 | 0.125930667 | 257.836455  |
| 32 O07 | 33948 | CG31103 | 33.15445    | 0.107507333 | 308.3924507 |
| 32 O08 | 34060 | CG5661  | 30.22339667 | 0.125060333 | 241.670527  |
| 32 O09 | 33956 | CG31259 | 30.98536667 | 0.11162     | 277.5969062 |
| 32 O10 | 34068 | CG5890  | 30.46205667 | 0.125590667 | 242.5503222 |
| 32 O11 | 33980 | CG31851 | 31.46204667 | 0.115024667 | 273.5243455 |
| 32 O12 | 34076 | CG6139  | 33.50805    | 0.119453333 | 280.5116363 |
| 32 O13 | 33988 | CG32018 | 40.53848333 | 0.125275333 | 323.5950945 |
| 32 O14 | 34092 | CG6531  | 29.57442333 | 0.095716    | 308.9809785 |
| 32 O15 | 33996 | CG3259  | 31.14637333 | 0.110494    | 281.8829378 |
| 32 O16 | 34100 | CG6890  | 30.95573667 | 0.09425     | 328.4428294 |
| 32 O17 | 34004 | CG33139 | 33.19884333 | 0.112474    | 295.1690465 |

|    |     |       |          |             |             |             |
|----|-----|-------|----------|-------------|-------------|-------------|
| 32 | O18 | 34116 | CG7125   | 29.89641667 | 0.093514333 | 319.6987628 |
| 32 | O19 | 34012 | CG3595   | 28.23959667 | 0.097565    | 289.4439263 |
| 32 | O20 | 34083 | CG6217   | 32.45347    | 0.090744    | 357.63764   |
| 32 | O21 |       | wts      | 119.5300333 | 0.093087333 | 1284.063353 |
| 32 | O22 |       | HFA17794 | 2.675391667 | 0.016365    | 163.4825339 |
| 32 | O23 |       | hpo      | 73.10838    | 0.082437    | 886.8394046 |
| 32 | O24 |       | Luc      | 5.045475    | 0.095734333 | 52.70287915 |
| 32 | P01 | 34212 | CG9019   | 35.14578    | 0.162444333 | 216.3558388 |
| 32 | P02 | 34219 | CG9059   | 36.47159667 | 0.165       | 221.0399798 |
| 32 | P03 | 34195 | CG8871   | 32.97362    | 0.13122     | 251.2850175 |
| 32 | P04 | 34298 | CG9847   | 35.31962333 | 0.130581333 | 270.4798797 |
| 32 | P05 | 34132 | CG7543   | 31.45108    | 0.130688667 | 240.6565221 |
| 32 | P06 | 34228 | CG9170   | 29.69274    | 0.122467333 | 242.4543688 |
| 32 | P07 | 34140 | CG7928   | 25.79209333 | 0.108617333 | 237.4583553 |
| 32 | P08 | 34236 | CG9248   | 30.90871    | 0.116199667 | 265.9965462 |
| 32 | P09 | 34148 | CG8065   | 33.31887333 | 0.120626333 | 276.2155859 |
| 32 | P10 | 34244 | CG9392   | 32.57956333 | 0.109907    | 296.4284653 |
| 32 | P11 | 34156 | CG8184   | 51.46141667 | 0.097414    | 528.2753677 |
| 32 | P12 | 34252 | CG9445   | 32.33893    | 0.119109    | 271.507023  |
| 32 | P13 | 34164 | CG8310   | 27.26947667 | 0.107896667 | 252.7369706 |
| 32 | P14 | 34260 | CG9458   | 29.78654333 | 0.093429333 | 318.8136131 |
| 32 | P15 | 34172 | CG8509   | 28.62295333 | 0.093951667 | 304.656153  |
| 32 | P16 | 34268 | CG9491   | 38.81703667 | 0.103522333 | 374.9629227 |
| 32 | P17 | 34180 | CG8665   | 33.14808667 | 0.093169    | 355.7845063 |
| 32 | P18 | 34276 | CG9573   | 23.18511667 | 0.094844667 | 244.4535627 |
| 32 | P19 | 34188 | CG8806   | 28.81155333 | 0.096333667 | 299.0808336 |
| 32 | P20 | 34292 | CG9759   | 29.67975    | 0.082645    | 359.1233589 |
| 32 | P21 |       | wts      | 103.3773667 | 0.061803667 | 1672.673682 |
| 32 | P22 |       | HFA17794 | 2.270527333 | 0.017543    | 129.4263999 |
| 32 | P23 |       | hpo      | 75.55707    | 0.072557333 | 1041.342984 |
| 32 | P24 |       | Luc      | 5.090937667 | 0.089958    | 56.59238385 |
| 33 | A01 |       | DIAP1    | 1.04357     | 0.013495333 | 77.32821222 |
| 33 | A02 |       | ex/ft    | 85.71991333 | 0.132711333 | 645.912532  |
| 33 | A03 |       | Luc      | 3.432814    | 0.165803667 | 20.70408978 |
| 33 | A04 |       | hpo      | 70.40666667 | 0.122843    | 573.1434975 |
| 33 | A05 | 19670 | CG6857   | 27.72344667 | 0.133366    | 207.8749206 |
| 33 | A06 | 31305 | CG15772  | 9.384632333 | 0.133041333 | 70.5392234  |
| 33 | A07 | 19673 | CG12673  | 26.16304    | 0.124068    | 210.876616  |
| 33 | A08 | 31310 | CG18809  | 30.63355333 | 0.130162333 | 235.3488336 |
| 33 | A09 | 19669 | CG6836   | 27.98775667 | 0.124502333 | 224.7970453 |
| 33 | A10 | NA    | NA       | 27.17676667 | 0.125669333 | 216.2561537 |
| 33 | A11 | 19668 | CG6802   | 26.41193667 | 0.123343    | 214.1340544 |
| 33 | A12 | 31301 | CG15740  | 22.61055667 | 0.115071333 | 196.4916545 |
| 33 | A13 | 19674 | CG7515   | 22.71895333 | 0.107769333 | 210.8109295 |
| 33 | A14 | 31311 | CG1640   | 21.96114667 | 0.123699667 | 177.5360214 |
| 33 | A15 | 19671 | CG7461   | 24.82931667 | 0.114040333 | 217.7239924 |
| 33 | A16 | 31224 | CG11491  | 36.47679    | 0.106755333 | 341.6858799 |
| 33 | A17 | 19672 | CG7476   | 25.73415667 | 0.104620667 | 245.9758429 |
| 33 | A18 | 17217 | CG9901   | 9.080526333 | 0.105236    | 86.28726228 |
| 33 | A19 | 19703 | CG6788   | 23.01015    | 0.121511    | 189.3668063 |
| 33 | A20 | 17218 | CG2987   | 24.60203    | 0.105870333 | 232.3788849 |
| 33 | A21 | 31312 | CG1724   | 26.62722667 | 0.117337333 | 226.9288547 |
| 33 | A22 | 17219 | CG3473   | 28.10610333 | 0.102011    | 275.5203197 |
| 33 | A23 | 31304 | CG12115  | 29.13919667 | 0.105814    | 275.381298  |

|    |     |       |                |             |             |             |
|----|-----|-------|----------------|-------------|-------------|-------------|
| 33 | A24 | 17216 | CG6224         | 23.72085333 | 0.104585667 | 226.80788   |
| 33 | B01 |       | DIAP1          | 1.098435667 | 0.016951667 | 64.79809262 |
| 33 | B02 |       | ex/ft          | 93.33429667 | 0.158371667 | 589.3370868 |
| 33 | B03 |       | Luc            | 4.451756    | 0.170489667 | 26.11158839 |
| 33 | B04 |       | hpo            | 73.89235    | 0.138360333 | 534.0573286 |
| 33 | B05 | 27211 | CG14307        | 34.68979333 | 0.14787     | 234.59656   |
| 33 | B06 | 23285 | CG3182         | 33.52279    | 0.162566    | 206.2103392 |
| 33 | B07 | 27216 | CG10093        | 28.62211667 | 0.156259667 | 183.1702145 |
| 33 | B08 | 23287 | CG3315         | 29.45639333 | 0.138849333 | 212.1464513 |
| 33 | B09 | 27217 | CG11523        | 29.79514667 | 0.151097333 | 197.191744  |
| 33 | B10 | 23286 | CG3248         | 27.57958333 | 0.140037    | 196.9449741 |
| 33 | B11 | 27219 | CG13670        | 29.69991667 | 0.134336333 | 221.0862537 |
| 33 | B12 | 23288 | CG3368         | 38.86550333 | 0.137047333 | 283.5918247 |
| 33 | B13 | 27220 | CG15280        | 32.24644    | 0.134460667 | 239.8206167 |
| 33 | B14 | 23282 | CG3622         | 26.0249     | 0.116332667 | 223.7110241 |
| 33 | B15 | 27218 | CG12625        | 36.13010333 | 0.144908667 | 249.3301758 |
| 33 | B16 | 23281 | CG3158         | 28.60886333 | 0.119319667 | 239.7665375 |
| 33 | B17 | 27212 | CG3351         | 40.00912667 | 0.131125667 | 305.1204824 |
| 33 | B18 | 23289 | CG3408         | 28.09723333 | 0.109232    | 257.2252942 |
| 33 | B19 | 34902 | CG5700         | 28.80331333 | 0.120435333 | 239.1599918 |
| 33 | B20 | 23292 | CG3544         | 38.31021667 | 0.096700333 | 396.1746082 |
| 33 | B21 | 34946 | CG9653         | 30.49586    | 0.103835    | 293.6953821 |
| 33 | B22 | 23478 | CG4867         | 30.36873667 | 0.109459333 | 277.4430991 |
| 33 | B23 | 34925 | CG7884         | 27.48318333 | 0.095104667 | 288.9782836 |
| 33 | B24 | 23477 | CG31293        | 33.73972333 | 0.11267     | 299.4561404 |
| 33 | C01 | 19678 | CG7589         | 36.43874    | 0.178519667 | 204.1161105 |
| 33 | C02 | 31300 | CG1681         | 28.07797333 | 0.146863    | 191.1848003 |
| 33 | C03 | 19665 | CG7568         | 30.93654667 | 0.133625333 | 231.5170776 |
| 33 | C04 | 31296 | CG12348        | 29.39825667 | 0.122017667 | 240.9344275 |
| 33 | C05 | 19682 | CG6859         | 29.77953    | 0.13039     | 228.3881433 |
| 33 | C06 | NA    | NA             | 29.21557667 | 0.132445    | 220.5864824 |
| 33 | C07 | 19685 | CG32373,CG7496 | 29.48736667 | 0.132961333 | 221.7739995 |
| 33 | C08 | NA    | NA             | 33.46692667 | 0.131393667 | 254.7073045 |
| 33 | C09 | 19681 | CG6840         | 22.00982333 | 0.103745667 | 212.1517365 |
| 33 | C10 | NA    | NA             | 31.57334333 | 0.13192     | 239.3370477 |
| 33 | C11 | 19700 | CG7556         | 30.74144667 | 0.120172    | 255.8120583 |
| 33 | C12 | 31289 | CG15737        | 31.28503    | 0.118320333 | 264.409583  |
| 33 | C13 | 19679 | CG6673,CG6781  | 35.32513667 | 0.129545667 | 272.684819  |
| 33 | C14 | 31299 | CG32648        | 31.78713333 | 0.116993667 | 271.6996077 |
| 33 | C15 | 19683 | CG7463         | 25.55302667 | 0.119861667 | 213.1876469 |
| 33 | C16 | 17211 | CG30183        | 29.78587    | 0.124211667 | 239.7992942 |
| 33 | C17 | 19684 | CG7480         | 32.25522333 | 0.122062667 | 264.2513408 |
| 33 | C18 | 17229 | CG33101        | 2.627035    | 0.21328     | 12.31730589 |
| 33 | C19 | 19715 | CG6792         | 26.60488333 | 0.101803    | 261.3369285 |
| 33 | C20 | 17230 | CG3009         | 26.38187    | 0.101331    | 260.3533963 |
| 33 | C21 | 31303 | CG32677        | 32.71479667 | 0.116873    | 279.9174888 |
| 33 | C22 | 17215 | CG5722         | 33.47142333 | 0.116441333 | 287.4531094 |
| 33 | C23 | 31292 | CG2120         | 30.73956    | 0.093335667 | 329.344195  |
| 33 | C24 | 17228 | CG9401         | 22.4926     | 0.132886333 | 169.2619507 |
| 33 | D01 | 19768 | CG7850         | 12.99254    | 0.141425667 | 91.8683313  |
| 33 | D02 | 24432 | CG10874        | 27.66050667 | 0.121621    | 227.431995  |
| 33 | D03 | 19780 | CG1956         | 40.27704333 | 0.186461333 | 216.0074832 |
| 33 | D04 | 23302 | CG3483         | 32.34958333 | 0.156215333 | 207.0832782 |
| 33 | D05 | 27223 | CG7760         | 32.97285333 | 0.140032333 | 235.4659995 |

|    |     |       |                        |             |             |             |
|----|-----|-------|------------------------|-------------|-------------|-------------|
| 33 | D06 | 23297 | CG3184                 | 34.44757667 | 0.138921333 | 247.9646275 |
| 33 | D07 | 27228 | CG10140                | 29.85653333 | 0.134293667 | 222.3227206 |
| 33 | D08 | 23299 | CG3325                 | 35.85706333 | 0.157406    | 227.7998509 |
| 33 | D09 | 27229 | CG11590                | 35.27786    | 0.142030667 | 248.3819926 |
| 33 | D10 | 23298 | CG3258                 | 29.72739    | 0.139059    | 213.7753759 |
| 33 | D11 | 27231 | CG13880                | 39.36074333 | 0.139550333 | 282.0540976 |
| 33 | D12 | 23300 | CG3385                 | 34.62741667 | 0.133658    | 259.0747779 |
| 33 | D13 | 27232 | CG15462                | 31.86539667 | 0.144438333 | 220.6159261 |
| 33 | D14 | 23294 | CG3626                 | 34.34243333 | 0.110063667 | 312.0233441 |
| 33 | D15 | 27230 | CG12632                | 20.78323333 | 0.114893    | 180.8920764 |
| 33 | D16 | 23293 | CG3160                 | 31.59442    | 0.122089    | 258.7818722 |
| 33 | D17 | 27270 | CG2803                 | 34.88709    | 0.091598667 | 380.8689719 |
| 33 | D18 | 23355 | CG3675                 | 30.1359     | 0.120697    | 249.6822622 |
| 33 | D19 | 34903 | CG5723                 | 33.40610333 | 0.112902    | 295.885842  |
| 33 | D20 | 23291 | CG31779,CG3513         | 33.71706667 | 0.108847333 | 309.764747  |
| 33 | D21 | 34911 | CG6575                 | 29.15184    | 0.098372667 | 296.3408535 |
| 33 | D22 | 23490 | CG4871                 | 28.91353333 | 0.112462333 | 257.0952645 |
| 33 | D23 | 34932 | CG8405                 | 33.68561333 | 0.097835667 | 344.3081085 |
| 33 | D24 | 23489 | CG4835                 | 30.7548     | 0.126067667 | 243.9547016 |
| 33 | E01 | 19690 | CG7592                 | 46.42935333 | 0.157235    | 295.286376  |
| 33 | E02 | NA    | NA                     | 50.79841667 | 0.135426333 | 375.0999929 |
| 33 | E03 | 19677 | CG18741                | 45.51781667 | 0.110548333 | 411.7458427 |
| 33 | E04 | 31306 | CG32813                | 42.18342667 | 0.124458667 | 338.9352288 |
| 33 | E05 | 19694 | CG7448                 | 42.10866333 | 0.119047333 | 353.7136209 |
| 33 | E06 | 31281 | CG15770                | 49.75813    | 0.112346667 | 442.8981427 |
| 33 | E07 | 19697 | CG31216                | 40.89763333 | 0.114234667 | 358.0142047 |
| 33 | E08 | NA    | NA                     | 53.41187    | 0.113057333 | 472.4317161 |
| 33 | E09 | 19693 | CG6845                 | 46.80093333 | 0.092096    | 508.175527  |
| 33 | E10 | 31285 | CG18091                | 49.55587    | 0.102052333 | 485.5927188 |
| 33 | E11 | 19692 | CG6808,CG6813          | 46.24893333 | 0.102338    | 451.9233651 |
| 33 | E12 | 31277 | CG15736                | 72.75092    | 0.089255    | 815.0906952 |
| 33 | E13 | 19698 | CG7520                 | 50.23746    | 0.119334    | 420.9819498 |
| 33 | E14 | 31287 | CG3981                 | 46.96322    | 0.099290667 | 472.9872563 |
| 33 | E15 | 19695 | CG7464                 | 41.53104667 | 0.085207667 | 487.4097401 |
| 33 | E16 | 17223 | CG4532                 | 59.29153    | 0.097384    | 608.842623  |
| 33 | E17 | 19696 | CG32177,CG32179,CG7484 | 50.39849    | 0.090853333 | 554.7236205 |
| 33 | E18 | 17241 | CG1149                 | 46.20709667 | 0.085842    | 538.2807561 |
| 33 | E19 | 31290 | CG1749                 | 44.46707667 | 0.092544333 | 480.4948619 |
| 33 | E20 | 17242 | CG3064                 | 57.35336333 | 0.099176333 | 578.2968719 |
| 33 | E21 | 31291 | CG1844                 | 46.20542    | 0.086418667 | 534.6694387 |
| 33 | E22 | 17299 | CG6176                 | 48.66093333 | 0.094083667 | 517.2091507 |
| 33 | E23 | 31219 | CG32521                | 53.07230333 | 0.094743    | 560.1712352 |
| 33 | E24 | 17240 | CG9426                 | 39.44094333 | 0.087674667 | 449.8556405 |
| 33 | F01 | 19778 | CG8896                 | 59.18492667 | 0.159251667 | 371.6440016 |
| 33 | F02 | 24491 | CG10850                | 58.21082667 | 0.182180333 | 319.5231099 |
| 33 | F03 | 19833 | CG30456                | 51.18221667 | 0.136536    | 374.8624294 |
| 33 | F04 | 23314 | CG32954                | 44.91222667 | 0.124963    | 359.404197  |
| 33 | F05 | 27235 | CG7960                 | 48.11491667 | 0.146502    | 328.4249817 |
| 33 | F06 | 23309 | CG3187                 | 42.57053667 | 0.120937    | 352.0058929 |
| 33 | F07 | 27240 | CG10145                | 37.69114667 | 0.124633    | 302.4170699 |
| 33 | F08 | 23311 | CG3326                 | 42.99184    | 0.108300333 | 396.9686766 |
| 33 | F09 | 27241 | CG11697                | 39.25635333 | 0.130854    | 300.0011718 |
| 33 | F10 | 23332 | CG4386                 | 42.13721667 | 0.11419     | 369.0096914 |
| 33 | F11 | 27243 | CG13999                | 47.06018333 | 0.115082333 | 408.926218  |

|    |     |       |                 |             |             |             |
|----|-----|-------|-----------------|-------------|-------------|-------------|
| 33 | F12 | 23312 | CG30277         | 43.90902    | 0.109881    | 399.6052093 |
| 33 | F13 | 27306 | CG3302          | 41.49447333 | 0.110734    | 374.7220667 |
| 33 | F14 | 23319 | CG3653          | 42.87056667 | 0.097323667 | 440.4947752 |
| 33 | F15 | 27238 | CG6038          | 45.34058333 | 0.084384333 | 537.3104407 |
| 33 | F16 | 23305 | CG3162          | 46.2318     | 0.090374    | 511.5608471 |
| 33 | F17 | 27282 | CG2813          | 51.6617     | 0.100257667 | 515.2892713 |
| 33 | F18 | 23313 | CG3413          | 40.22953667 | 0.084138667 | 478.1337554 |
| 33 | F19 | 34904 | CG5732          | 40.02476667 | 0.091446333 | 437.6858558 |
| 33 | F20 | 23316 | CG3561          | 40.58066333 | 0.085143    | 476.6177294 |
| 33 | F21 | 34947 | CG9696          | 52.05422667 | 0.125359667 | 415.2390322 |
| 33 | F22 | 23502 | CG4872          | 37.7575     | 0.075040667 | 503.1605085 |
| 33 | F23 | 34927 | CG7937          | 42.39132667 | 0.091734667 | 462.1080362 |
| 33 | F24 | 23501 | CG33006         | 38.25459333 | 0.084027667 | 455.261878  |
| 33 | G01 | 19702 | CG7602          | 37.23000667 | 0.143149667 | 260.0774947 |
| 33 | G02 | 31276 | CG1670          | 33.48376333 | 0.121890667 | 274.7032587 |
| 33 | G03 | 19689 | CG7570          | 33.81916667 | 0.122727    | 275.5641926 |
| 33 | G04 | NA    | NA              | 45.10070667 | 0.131289667 | 343.5206122 |
| 33 | G05 | 19706 | CG7450          | 37.22785    | 0.148201667 | 251.1972425 |
| 33 | G06 | 31269 | CG15766         | 36.93991333 | 0.122551    | 301.4248218 |
| 33 | G07 | 19709 | CG7502          | 33.39686333 | 0.110901333 | 301.1403229 |
| 33 | G08 | 31274 | CG18646         | 33.60991667 | 0.110756    | 303.4591053 |
| 33 | G09 | 19705 | CG6846          | 4.470464    | 0.147511667 | 30.30583344 |
| 33 | G10 | 31273 | CG1558          | 42.8848     | 0.140053333 | 306.2033511 |
| 33 | G11 | 19704 | CG6816          | 33.14194    | 0.104362333 | 317.5661078 |
| 33 | G12 | 31265 | CG12720         | 33.87289667 | 0.096975333 | 349.2939442 |
| 33 | G13 | 19710 | CG14322,CG7523  | 37.89013667 | 0.121913667 | 310.7948248 |
| 33 | G14 | 31307 | CG12794         | 36.54782667 | 0.113868    | 320.9666163 |
| 33 | G15 | 19707 | CG7467          | 46.49000667 | 0.092823667 | 500.8421703 |
| 33 | G16 | 17235 | CG4767          | 36.83662333 | 0.108779667 | 338.6351922 |
| 33 | G17 | 19708 | CG7485          | 32.72220333 | 0.098059667 | 333.6968648 |
| 33 | G18 | 17253 | CG1470          | 38.64866667 | 0.104318    | 370.4889536 |
| 33 | G19 | 31278 | CG1753          | 38.02681667 | 0.107619    | 353.3466829 |
| 33 | G20 | 17254 | CG3263          | 34.28461333 | 0.138489667 | 247.5608048 |
| 33 | G21 | 31279 | CG1840          | 33.75459333 | 0.08703     | 387.85009   |
| 33 | G22 | 17239 | CG5753          | 37.66869333 | 0.100959    | 373.1088198 |
| 33 | G23 | 31268 | CG12111         | 31.92896    | 0.103500667 | 308.4903801 |
| 33 | G24 | 17252 | CG9580          | 46.40611667 | 0.087514    | 530.2707757 |
| 33 | H01 | 19788 | CG9739          | 40.97793333 | 0.147932    | 277.0052006 |
| 33 | H02 | 24456 | CG10908         | 32.82864667 | 0.161448667 | 203.3379857 |
| 33 | H03 | 27239 | CG9072          | 32.0001     | 0.137837    | 232.1589994 |
| 33 | H04 | 23326 | CG3485          | 30.45760667 | 0.125231    | 243.2113987 |
| 33 | H05 | 27247 | CG8007          | 42.87406667 | 0.139550333 | 307.2301272 |
| 33 | H06 | 23321 | CG30174,CG30179 | 36.36870333 | 0.135122667 | 269.1532385 |
| 33 | H07 | 27252 | CG10365         | 38.98152667 | 0.109214333 | 356.9268381 |
| 33 | H08 | 23323 | CG3337          | 33.08325667 | 0.115880667 | 285.4941865 |
| 33 | H09 | 27253 | CG11709         | 33.85766333 | 0.123126    | 274.9838648 |
| 33 | H10 | 23322 | CG3284          | 17.33557    | 0.082965333 | 208.9495613 |
| 33 | H11 | 27255 | CG14057         | 28.88867    | 0.108947667 | 265.1609794 |
| 33 | H12 | 23324 | CG3388          | 34.66574333 | 0.110548333 | 313.5799726 |
| 33 | H13 | 27256 | CG15676         | 36.31982667 | 0.118707667 | 305.9602441 |
| 33 | H14 | 23318 | CG3631          | 38.17982    | 0.109208667 | 349.6043049 |
| 33 | H15 | 27254 | CG12766         | 34.67044    | 0.103352333 | 335.458706  |
| 33 | H16 | 23317 | CG3164          | 32.49837667 | 0.103549333 | 313.8443834 |
| 33 | H17 | 27294 | CG3078          | 31.80644667 | 0.088277333 | 360.3013986 |

|    |     |       |         |             |             |             |
|----|-----|-------|---------|-------------|-------------|-------------|
| 33 | H18 | 23325 | CG3437  | 29.30383667 | 0.102751    | 285.1927151 |
| 33 | H19 | 34945 | CG9553  | 17.67658333 | 0.071800667 | 246.1896825 |
| 33 | H20 | 23315 | CG3524  | 34.61181    | 0.089077667 | 388.5576632 |
| 33 | H21 | 34913 | CG6668  | 23.90319333 | 0.071090667 | 336.2353239 |
| 33 | H22 | 23514 | CG4889  | 37.09817667 | 0.094761667 | 391.4892801 |
| 33 | H23 | 34928 | CG8013  | 49.17777333 | 0.110357    | 445.6244129 |
| 33 | H24 | 23513 | CG4854  | 39.88976333 | 0.093321    | 427.4468055 |
| 33 | I01 | 19714 | CG7603  | 37.35835    | 0.176712333 | 211.4077116 |
| 33 | I02 | 31264 | CG1689  | 31.84493667 | 0.145099333 | 219.4699034 |
| 33 | I03 | 19701 | CG7571  | 31.40641    | 0.137474667 | 228.4523452 |
| 33 | I04 | 31282 | CG17764 | 37.05362333 | 0.138198333 | 268.1191765 |
| 33 | I05 | 19718 | CG7457  | 30.17660333 | 0.131965    | 228.6712638 |
| 33 | I06 | 31257 | CG33174 | 37.09057333 | 0.146180333 | 253.7316237 |
| 33 | I07 | 19721 | CG7503  | 32.36192333 | 0.146368667 | 221.0987097 |
| 33 | I08 | 31262 | CG12179 | 28.46326333 | 0.126063    | 225.7860223 |
| 33 | I09 | 19717 | CG6847  | 31.19296667 | 0.126642    | 246.3082284 |
| 33 | I10 | 31261 | CG1554  | 10.01148333 | 0.043033    | 232.646651  |
| 33 | I11 | 19716 | CG6817  | 23.39893667 | 0.118071667 | 198.1757125 |
| 33 | I12 | 31254 | CG15927 | 33.07611667 | 0.124697333 | 265.2511949 |
| 33 | I13 | 19722 | CG7537  | 33.19803333 | 0.121661667 | 272.8717619 |
| 33 | I14 | NA    | NA      | 27.77379667 | 0.111534333 | 249.0156693 |
| 33 | I15 | 19719 | CG31342 | 29.43489333 | 0.107367333 | 274.1512937 |
| 33 | I16 | 17247 | CG32955 | 30.27855333 | 0.117051    | 258.6782969 |
| 33 | I17 | 19720 | CG7488  | 32.20702667 | 0.104718333 | 307.5586255 |
| 33 | I18 | 17265 | CG1531  | 27.56758    | 0.11486     | 240.0102734 |
| 33 | I19 | 31266 | CG1745  | 29.91511333 | 0.103227    | 289.7993096 |
| 33 | I20 | 17266 | CG3339  | 26.68659333 | 0.123614667 | 215.8853318 |
| 33 | I21 | 31267 | CG32597 | 27.74599    | 0.091984667 | 301.6371207 |
| 33 | I22 | 17251 | CG32030 | 25.12487    | 0.103598    | 242.5227321 |
| 33 | I23 | 31256 | CG1999  | 29.73201333 | 0.098586    | 301.5845387 |
| 33 | I24 | 17264 | CG9623  | 27.36025667 | 0.104543667 | 261.7112785 |
| 33 | J01 | 19797 | CG10497 | 28.78187    | 0.123718667 | 232.6396717 |
| 33 | J02 | 24468 | CG10913 | 26.57760667 | 0.157188    | 169.0816517 |
| 33 | J03 | 27251 | CG9150  | 29.08392    | 0.154487    | 188.2612776 |
| 33 | J04 | 23338 | CG30414 | 29.32041333 | 0.210028    | 139.6024022 |
| 33 | J05 | 27259 | CG8333  | 28.1444     | 0.137615667 | 204.5145054 |
| 33 | J06 | 23333 | CG3222  | 35.87623667 | 0.159327667 | 225.1726735 |
| 33 | J07 | 27264 | CG10597 | 28.44216667 | 0.128206667 | 221.8462378 |
| 33 | J08 | 23335 | CG3340  | 33.3186     | 0.151142667 | 220.4447013 |
| 33 | J09 | 27272 | CG4330  | 36.38886    | 0.145642667 | 249.8502728 |
| 33 | J10 | 23334 | CG3295  | 35.71298333 | 0.144577    | 247.0170451 |
| 33 | J11 | 27245 | CG18228 | 32.48618667 | 0.124266333 | 261.4238772 |
| 33 | J12 | 23336 | CG3389  | 31.41301667 | 0.123330333 | 254.7063307 |
| 33 | J13 | 27268 | CG15696 | 32.05543667 | 0.127978    | 250.4761495 |
| 33 | J14 | 23330 | CG3633  | 34.90856333 | 0.138173333 | 252.6432741 |
| 33 | J15 | 27266 | CG12951 | 31.33750333 | 0.111677333 | 280.6075539 |
| 33 | J16 | 23343 | CG3668  | 32.40342333 | 0.103496333 | 313.0876456 |
| 33 | J17 | 27260 | CG3893  | 30.80481667 | 0.104582667 | 294.5499254 |
| 33 | J18 | 23337 | CG3445  | 40.05878667 | 0.114289333 | 350.5032841 |
| 33 | J19 | 34906 | CG5953  | 13.94793667 | 0.107806    | 129.3799665 |
| 33 | J20 | 23368 | CG4395  | 28.55598    | 0.100804333 | 283.2812743 |
| 33 | J21 | 34914 | CG6741  | 27.19121    | 0.113238667 | 240.1230145 |
| 33 | J22 | 23526 | CG4903  | 37.83708    | 0.100046333 | 378.1955694 |
| 33 | J23 | 34929 | CG8243  | 23.27312    | 0.091149    | 255.3305028 |



|    |     |       |                |             |             |             |
|----|-----|-------|----------------|-------------|-------------|-------------|
| 33 | J24 | 23525 | CG4858         | 29.96136667 | 0.093518667 | 320.3784628 |
| 33 | K02 | 31253 | CG1677         | 29.45377    | 0.165762667 | 177.686391  |
| 33 | K03 | 19676 | CG7550         | 9.738228333 | 0.185783    | 52.41721973 |
| 33 | K04 | 31249 | CG2707         | 20.07777    | 0.140350333 | 143.0546656 |
| 33 | K05 | 19730 | CG7458         | 30.44049333 | 0.163956667 | 185.6618212 |
| 33 | K06 | 31246 | CG12726        | 24.46577333 | 0.136988333 | 178.5974961 |
| 33 | K07 | 19733 | CG7504         | 25.55032667 | 0.142652    | 179.1094879 |
| 33 | K08 | 31251 | CG18313        | 21.68820333 | 0.113303667 | 191.4166061 |
| 33 | K09 | 19729 | CG6850         | 21.04221    | 0.128394    | 163.8877985 |
| 33 | K1  | 19726 | CG7604         | 26.21019    | 0.103077    | 254.2777729 |
| 33 | K10 | 31271 | CG16782        | 27.59896    | 0.143182333 | 192.7539478 |
| 33 | K11 | 19728 | CG6830         | 23.36418667 | 0.114021333 | 204.91066   |
| 33 | K12 | 31236 | CG11556        | 25.55008667 | 0.137071667 | 186.3994747 |
| 33 | K13 | 19734 | CG7538         | 24.03419667 | 0.105042    | 228.8055889 |
| 33 | K14 | 31283 | CG32776        | 24.28558    | 0.101317333 | 239.698176  |
| 33 | K15 | 19724 | CG7564         | 25.47828667 | 0.108234667 | 235.3985784 |
| 33 | K16 | 17259 | CG4905         | 25.10849333 | 0.100257    | 250.4412992 |
| 33 | K17 | 19749 | CG7579         | 27.68759667 | 0.103920333 | 266.430984  |
| 33 | K18 | 17277 | CG1583         | 26.67315    | 0.127604667 | 209.0295809 |
| 33 | K19 | 31221 | CG4147         | 2.476948    | 0.208037667 | 11.90624775 |
| 33 | K20 | 17278 | CG3352         | 26.62914667 | 0.109453333 | 243.2922402 |
| 33 | K21 | 31255 | CG1796         | 15.33626667 | 0.202281333 | 75.81651957 |
| 33 | K22 | 17263 | CG5972         | 11.07583233 | 0.126021333 | 87.88855062 |
| 33 | K23 | 31245 | CG1994         | 34.32884333 | 0.145281    | 236.2927247 |
| 33 | K24 | 17300 | CG9881         | 11.45009667 | 0.101375333 | 112.9475612 |
| 33 | L01 | 19806 | CG11614        | 24.58303333 | 0.159967333 | 153.6753337 |
| 33 | L02 | 24503 | CG32264        | 32.73713667 | 0.163018667 | 200.8183316 |
| 33 | L03 | 27263 | CG9187         | 30.20087333 | 0.177396    | 170.2455147 |
| 33 | L04 | 23351 | CG30267,CG3536 | 31.39855333 | 0.152463667 | 205.9412188 |
| 33 | L05 | 27271 | CG8348         | 21.81383    | 0.169662667 | 128.5717738 |
| 33 | L06 | 23345 | CG3224         | 23.61013667 | 0.182829667 | 129.1373391 |
| 33 | L07 | 27276 | CG11121        | 22.27861    | 0.125084667 | 178.1082414 |
| 33 | L08 | 23347 | CG3347         | 26.08881667 | 0.140406333 | 185.8094008 |
| 33 | L09 | 27277 | CG11900        | 25.13577    | 0.128729    | 195.26113   |
| 33 | L10 | 23346 | CG3298         | 23.60353333 | 0.128597667 | 183.5455801 |
| 33 | L11 | 27279 | CG14750        | 31.15742333 | 0.128212667 | 243.0136128 |
| 33 | L12 | 23307 | CG3650         | 29.52116333 | 0.114393    | 258.0679179 |
| 33 | L13 | 27280 | CG16724        | 27.11399    | 0.120793667 | 224.4653279 |
| 33 | L14 | 23342 | CG3635         | 27.38633333 | 0.122248    | 224.0227516 |
| 33 | L15 | 27278 | CG32556        | 29.28754    | 0.117248667 | 249.7899621 |
| 33 | L16 | 23341 | CG3169         | 33.12851333 | 0.122469333 | 270.5045617 |
| 33 | L17 | 34955 | CG9941         | 29.07097    | 0.102965333 | 282.3374534 |
| 33 | L18 | 23284 | CG4372         | 22.79953    | 0.102717333 | 221.9638036 |
| 33 | L19 | 34907 | CG6004         | 31.01264667 | 0.097406667 | 318.3832044 |
| 33 | L20 | 23485 | CG4805         | 26.66241333 | 0.101682667 | 262.2119798 |
| 33 | L21 | 34915 | CG6889         | 28.04102667 | 0.091323    | 307.0532798 |
| 33 | L22 | 23521 | CG4813         | 25.52457667 | 0.099241333 | 257.1970348 |
| 33 | L23 | 34930 | CG8300         | 26.12621667 | 0.095698    | 273.0069246 |
| 33 | L24 | 23561 | CG4866         | 31.54932667 | 0.113333333 | 278.3764118 |
| 33 | M01 | 19738 | CG6199,CG7607  | 31.98189667 | 0.161922333 | 197.5138081 |
| 33 | M02 | NA    | NA             | 26.29186667 | 0.159456333 | 164.8844302 |
| 33 | M03 | 19688 | CG7551         | 30.52299667 | 0.128138    | 238.2040977 |
| 33 | M04 | 31237 | CG32703        | 27.19984    | 0.124367333 | 218.7056623 |
| 33 | M05 | 19742 | CG7459         | 23.20983    | 0.128608333 | 180.4690987 |

|    |     |       |                |             |             |             |
|----|-----|-------|----------------|-------------|-------------|-------------|
| 33 | M06 | 31234 | CG32636        | 23.79448    | 0.132995333 | 178.9121423 |
| 33 | M07 | 19745 | CG7508         | 24.21997667 | 0.110057    | 220.067571  |
| 33 | M08 | 31258 | CG15781        | 27.58620667 | 0.133737667 | 206.2710331 |
| 33 | M09 | 19741 | CG6851         | 27.22328333 | 0.115702333 | 235.2872457 |
| 33 | M10 | 31235 | CG17761        | 21.1875     | 0.119437333 | 177.3942821 |
| 33 | M11 | 19740 | CG6833         | 26.79187333 | 0.12963     | 206.6795752 |
| 33 | M12 | 31230 | CG15720        | 27.21571333 | 0.116834667 | 232.9421062 |
| 33 | M13 | 19746 | CG7542         | 26.80457    | 0.10896     | 246.0037628 |
| 33 | M14 | 31240 | CG18823        | 24.30172667 | 0.107198667 | 226.6980311 |
| 33 | M15 | 19736 | CG7565         | 27.08094    | 0.100396667 | 269.7394336 |
| 33 | M16 | 17271 | CG5627         | 27.57356667 | 0.127749    | 215.8417417 |
| 33 | M17 | 19744 | CG7492         | 28.04039667 | 0.126183    | 222.2200825 |
| 33 | M18 | 17289 | CG1599         | 23.44850667 | 0.125425333 | 186.9519183 |
| 33 | M19 | 31243 | CG1740         | 26.51736    | 0.099417333 | 266.7277336 |
| 33 | M20 | 17290 | CG3421         | 24.64189333 | 0.097246667 | 253.3957634 |
| 33 | M21 | 31244 | CG1789         | 24.83989333 | 0.11774     | 210.9724251 |
| 33 | M22 | 17275 | CG6095         | 26.82726    | 0.097472667 | 275.2285427 |
| 33 | M23 | 31233 | CG12106        | 26.70034333 | 0.080655    | 331.04387   |
| 33 | M24 | 17288 | CG9764         | 28.03698667 | 0.096275    | 291.217727  |
| 33 | N01 | 19760 | CG17964        | 28.77079667 | 0.193689333 | 148.5409453 |
| 33 | N02 | 24492 | CG10924        | 27.04499333 | 0.178856    | 151.2109928 |
| 33 | N03 | 27275 | CG9617         | 28.23152    | 0.166001    | 170.0683731 |
| 33 | N04 | 23363 | CG3540         | 43.19365    | 0.170222667 | 253.7479341 |
| 33 | N05 | 27283 | CG8353         | 21.55721    | 0.143502    | 150.2223662 |
| 33 | N06 | 23357 | CG3238         | 28.10313667 | 0.157880333 | 178.00277   |
| 33 | N07 | 27288 | CG11246        | 13.58724333 | 0.092181    | 147.3974391 |
| 33 | N08 | 23295 | CG3649         | 30.24555    | 0.141181333 | 214.2319334 |
| 33 | N09 | 27273 | CG15148,CG5674 | 34.81469667 | 0.146996667 | 236.8400417 |
| 33 | N10 | 23358 | CG3306         | 35.56616333 | 0.121121333 | 293.6407844 |
| 33 | N11 | 27291 | CG14983        | 28.57957667 | 0.135139    | 211.4828189 |
| 33 | N12 | 23360 | CG3400         | 33.62452    | 0.141063333 | 238.3647062 |
| 33 | N13 | 27292 | CG31220        | 25.42679    | 0.111482    | 228.0797797 |
| 33 | N14 | 23354 | CG3639         | 27.47206    | 0.130161333 | 211.0616056 |
| 33 | N15 | 27286 | CG6340         | 21.01389333 | 0.119325667 | 176.1053922 |
| 33 | N16 | 23353 | CG3178         | 31.3457     | 0.133282333 | 235.1827074 |
| 33 | N17 | 34944 | CG9369         | 31.88333667 | 0.123274667 | 258.6365677 |
| 33 | N18 | 23296 | CG4373         | 27.67164667 | 0.111389333 | 248.4227694 |
| 33 | N19 | 34908 | CG6043         | 27.32859667 | 0.103961    | 262.8735455 |
| 33 | N20 | 23497 | CG4806         | 25.73361333 | 0.147538333 | 174.4198457 |
| 33 | N21 | 34916 | CG6993         | 14.96074    | 0.131036667 | 114.1721656 |
| 33 | N22 | 23557 | CG4818         | 26.77397    | 0.108496667 | 246.7722818 |
| 33 | N23 | 34948 | CG9731         | 25.75432    | 0.104756667 | 245.8489834 |
| 33 | N24 | 23549 | CG4865,CG6121  | 39.61838667 | 0.133026333 | 297.8236389 |
| 33 | O01 | 19750 | CG7610         | 31.68686667 | 0.170183333 | 186.1925375 |
| 33 | O02 | 31229 | CG1659         | 31.23639333 | 0.155183667 | 201.2866045 |
| 33 | O03 | 19737 | CG7577         | 24.63188667 | 0.146866667 | 167.7159782 |
| 33 | O04 | 31225 | CG17333        | 30.40947667 | 0.165374667 | 183.8823157 |
| 33 | O05 | 19754 | CG7460         | 29.99835667 | 0.131474    | 228.1694987 |
| 33 | O06 | 31222 | CG15745        | 26.57987    | 0.198099667 | 134.1742288 |
| 33 | O07 | 19757 | CG7512         | 30.95603667 | 0.156489    | 197.8160552 |
| 33 | O08 | 31247 | CG17763        | 45.16994    | 0.141177333 | 319.9517864 |
| 33 | O09 | 19748 | CG7567         | 30.19457333 | 0.124358667 | 242.8023245 |
| 33 | O10 | 31226 | CG17959        | 33.32730333 | 0.128848333 | 258.6552924 |
| 33 | O11 | 19752 | CG6834         | 27.80755667 | 0.123279667 | 225.5648269 |

|    |     |       |                |             |             |             |
|----|-----|-------|----------------|-------------|-------------|-------------|
| 33 | O12 | 31218 | CG32645        | 30.00099333 | 0.129648    | 231.4034411 |
| 33 | O13 | 19758 | CG32372        | 31.53412333 | 0.120638    | 261.3946131 |
| 33 | O14 | NA    | NA             | 29.00621667 | 0.127181    | 228.0703617 |
| 33 | O15 | 19755 | CG31719        | 29.09578333 | 0.143239667 | 203.1265781 |
| 33 | O16 | 17295 | CG5686         | 28.76077667 | 0.111159667 | 258.7339233 |
| 33 | O17 | 19756 | CG18768        | 30.17403667 | 0.109493667 | 275.5779177 |
| 33 | O18 | 17301 | CG32717        | 25.97626667 | 0.103221    | 251.6568011 |
| 33 | O19 | 31220 | CG32513        | 31.97358333 | 0.109178333 | 292.8564886 |
| 33 | O20 | 17302 | CG3469         | 25.40129    | 0.123102333 | 206.34288   |
| 33 | O21 |       | wts            | 98.16146    | 0.104339    | 940.7935671 |
| 33 | O22 |       | HFA17794       | 2.576683667 | 0.016139333 | 159.6524227 |
| 33 | O23 |       | hpo            | 75.89044    | 0.088361333 | 858.8648127 |
| 33 | O24 |       | Luc            | 4.659199667 | 0.096921333 | 48.07197246 |
| 33 | P01 | 19824 | CG14026        | 39.54849    | 0.224509667 | 176.154954  |
| 33 | P02 | 24504 | CG10938        | 4.36057     | 0.121331    | 35.93945488 |
| 33 | P03 | 27299 | CG9976         | 29.66509    | 0.182269    | 162.7544454 |
| 33 | P04 | 23375 | CG3542         | 28.38554333 | 0.219108333 | 129.5502681 |
| 33 | P05 | 27295 | CG8361         | 26.70479333 | 0.159111    | 167.8375055 |
| 33 | P06 | 23369 | CG3241         | 24.68112667 | 0.151885    | 162.4987765 |
| 33 | P07 | 27305 | CG18643        | 26.32765333 | 0.181419    | 145.1207058 |
| 33 | P08 | 23371 | CG3362         | 36.02484    | 0.146832667 | 245.3462218 |
| 33 | P09 | 27301 | CG12477        | 29.90134333 | 0.151302    | 197.6268875 |
| 33 | P10 | 23370 | CG3309         | 27.91046    | 0.150071667 | 185.9808758 |
| 33 | P11 | 27281 | CG18594        | 33.02140667 | 0.147357333 | 224.0906911 |
| 33 | P12 | 23372 | CG3407         | 28.61095333 | 0.137976    | 207.3618117 |
| 33 | P13 | 27297 | CG5768         | 24.97589    | 0.111627667 | 223.7428296 |
| 33 | P14 | 23366 | CG3640         | 31.31007    | 0.126069333 | 248.3559576 |
| 33 | P15 | 27302 | CG13410        | 39.33613    | 0.138215667 | 284.5996474 |
| 33 | P16 | 23365 | CG3181         | 20.84439333 | 0.121539333 | 171.5032719 |
| 33 | P17 | 34901 | CG5466         | 25.59533    | 0.121826667 | 210.0962843 |
| 33 | P18 | 23373 | CG3478         | 26.22026    | 0.114472333 | 229.0532501 |
| 33 | P19 | 34909 | CG6120         | 27.37895333 | 0.101453333 | 269.8674596 |
| 33 | P20 | 23509 | CG30061,CG4812 | 29.18278667 | 0.135629667 | 215.165217  |
| 33 | P21 |       | wts            | 109.12278   | 0.085537    | 1275.737751 |
| 33 | P22 |       | HFA17794       | 2.374977333 | 0.013466    | 176.3684341 |
| 33 | P23 |       | hpo            | 76.54801667 | 0.102500333 | 746.8074901 |
| 33 | P24 |       | Luc            | 3.77314     | 0.114177333 | 33.04631392 |
| 34 | A01 |       | DIAP1          | 0.995324333 | 0.013263    | 75.04518837 |
| 34 | A02 |       | ex/ft          | 91.20422    | 0.161713333 | 563.9870141 |
| 34 | A03 |       | Luc            | 3.351113333 | 0.164553333 | 20.36490702 |
| 34 | A04 |       | hpo            | 88.87136667 | 0.143169    | 620.7444815 |
| 34 | A05 | 23479 | CG4918         | 8.651409667 | 0.155328667 | 55.6974437  |
| 34 | A06 | 19377 | CG1866         | 26.05690333 | 0.164011667 | 158.872255  |
| 34 | A07 | 23481 | CG5638         | 24.45927667 | 0.215198    | 113.6594051 |
| 34 | A08 | 19382 | CG2099         | 6.092755    | 0.227589667 | 26.77078924 |
| 34 | A09 | 23482 | CG5663         | 31.16182667 | 0.158570667 | 196.5169682 |
| 34 | A10 | 19383 | CG2249         | 25.64520333 | 0.132999333 | 192.8220442 |
| 34 | A11 | 23476 | CG5902         | 27.79518    | 0.153268    | 181.350184  |
| 34 | A12 | 29499 | CG31182        | 27.92063333 | 0.144056333 | 193.8174649 |
| 34 | A13 | 24910 | CG12674        | 31.15496667 | 0.131202333 | 237.4574131 |
| 34 | A14 | 29501 | CG31207        | 26.67017667 | 0.125507333 | 212.4989509 |
| 34 | A15 | 24909 | CG12237        | 26.13059667 | 0.137255    | 190.3799254 |
| 34 | A16 | 29502 | CG31227        | 29.84440333 | 0.142971    | 208.744454  |
| 34 | A17 | 24916 | CG12410        | 29.07459667 | 0.138556667 | 209.839031  |

|    |     |       |                |             |             |             |
|----|-----|-------|----------------|-------------|-------------|-------------|
| 34 | A18 | 29503 | CG31244        | 27.28486    | 0.130024    | 209.8447979 |
| 34 | A19 | 24914 | CG12327        | 28.36496333 | 0.139887    | 202.7705458 |
| 34 | A20 | 29504 | CG31267        | 28.7771     | 0.117579667 | 244.7455484 |
| 34 | A21 | 24917 | CG12479        | 29.65874333 | 0.106361333 | 278.8489238 |
| 34 | A22 | 29498 | CG31171        | 24.96802    | 0.125382667 | 199.1345428 |
| 34 | A23 | 24911 | CG13338        | 30.10943333 | 0.117956    | 255.2598709 |
| 34 | A24 | 29500 | CG31198        | 30.42711667 | 0.116839333 | 260.4184379 |
| 34 | B01 |       | DIAP1          | 1.100546333 | 0.017248    | 63.80718537 |
| 34 | B02 |       | ex/ft          | 91.49054    | 0.147076    | 622.063015  |
| 34 | B03 |       | Luc            | 3.904601333 | 0.168706333 | 23.14436723 |
| 34 | B04 |       | hpo            | 78.86602333 | 0.185394667 | 425.3953188 |
| 34 | B05 | 33557 | CG12716        | 34.07280667 | 0.168924333 | 201.7045502 |
| 34 | B06 | 34306 | CG9916         | 29.74678333 | 0.189450333 | 157.0162628 |
| 34 | B07 | 33573 | CG12880        | 28.14088333 | 0.178534667 | 157.6213957 |
| 34 | B08 | 33845 | CG17974        | 23.09764667 | 0.176512333 | 130.8557098 |
| 34 | B09 | 33581 | CG12914        | 29.91394333 | 0.169205    | 176.7911311 |
| 34 | B10 | 33853 | CG18128        | 24.06755    | 0.152551667 | 157.766549  |
| 34 | B11 | 33589 | CG12975        | 29.49434667 | 0.165936    | 177.7453155 |
| 34 | B12 | 33861 | CG18265        | 12.64116667 | 0.145909333 | 86.63713539 |
| 34 | B13 | 33613 | CG13243        | 29.56476333 | 0.162351    | 182.1039805 |
| 34 | B14 | 33869 | CG18404        | 26.77151    | 0.130635    | 204.9336701 |
| 34 | B15 | 33621 | CG13314        | 29.98613    | 0.134771667 | 222.4958015 |
| 34 | B16 | 33877 | CG18554        | 27.94319333 | 0.129319333 | 216.0790086 |
| 34 | B17 | 33629 | CG13405        | 31.14123333 | 0.151294333 | 205.8321197 |
| 34 | B18 | 33885 | CG18764        | 28.56039667 | 0.121445    | 235.1714494 |
| 34 | B19 | 33637 | CG13463        | 28.94113667 | 0.131608667 | 219.9029699 |
| 34 | B20 | 33893 | CG1893         | 27.35214    | 0.120110667 | 227.7244874 |
| 34 | B21 | 33565 | CG12839        | 27.1447     | 0.133073333 | 203.9830169 |
| 34 | B22 | 33838 | CG17896        | 30.15356667 | 0.127660333 | 236.2015348 |
| 34 | B23 | 33597 | CG13074        | 28.05735333 | 0.107589667 | 260.7811159 |
| 34 | B24 | 33902 | CG2158         | 25.73540333 | 0.120726333 | 213.1714152 |
| 34 | C01 | 23496 | CG5755         | 48.34038667 | 0.218728333 | 221.0065149 |
| 34 | C02 | 23212 | CG3117         | 37.84065    | 0.159877    | 236.6860149 |
| 34 | C03 | 23492 | CG4969         | 31.13151333 | 0.180914667 | 172.0784385 |
| 34 | C04 | 16757 | CG10418        | 30.57805    | 0.15348     | 199.231496  |
| 34 | C05 | 23491 | CG4919         | 32.28069333 | 0.197742333 | 163.2462447 |
| 34 | C06 | 19389 | CG1874         | 50.34385    | 0.174045667 | 289.2565553 |
| 34 | C07 | 23493 | CG5640         | 23.65055667 | 0.172033333 | 137.4765937 |
| 34 | C08 | 19394 | CG2101         | 42.61618333 | 0.213431333 | 199.6716352 |
| 34 | C09 | 23494 | CG17924,CG5677 | 34.57541333 | 0.155604    | 222.2013144 |
| 34 | C10 | 19441 | CG1218,CG2046  | 36.88404667 | 0.155363333 | 237.4050934 |
| 34 | C11 | 23536 | CG5912         | 41.18809333 | 0.152023    | 270.9333018 |
| 34 | C12 | 29511 | CG31184        | 30.60783333 | 0.163080667 | 187.6852355 |
| 34 | C13 | 24922 | CG12679        | 40.06063333 | 0.141875    | 282.3656975 |
| 34 | C14 | 29513 | CG31208        | 33.29777    | 0.123842    | 268.8729995 |
| 34 | C15 | 24921 | CG12245        | 30.52894667 | 0.134129333 | 227.6082786 |
| 34 | C16 | 29514 | CG31229        | 25.63702667 | 0.191574667 | 133.8226349 |
| 34 | C17 | 24928 | CG12413        | 33.64273    | 0.152165667 | 221.0927783 |
| 34 | C18 | 29515 | CG31245        | 31.63039667 | 0.114069667 | 277.2901648 |
| 34 | C19 | 24926 | CG12330        | 33.23333667 | 0.134551333 | 246.9937372 |
| 34 | C20 | 29516 | CG31268        | 36.11523333 | 0.129913    | 277.9955303 |
| 34 | C21 | 24919 | CG12584        | 34.78529667 | 0.123333    | 282.0437082 |
| 34 | C22 | 29510 | CG31172        | 35.01158333 | 0.146056333 | 239.7128733 |
| 34 | C23 | 24925 | CG12290        | 38.22256667 | 0.114369667 | 334.2019591 |

|    |     |       |         |             |             |             |
|----|-----|-------|---------|-------------|-------------|-------------|
| 34 | C24 | 29512 | CG31199 | 33.58562    | 0.113322    | 296.3733432 |
| 34 | D01 | 33549 | CG12524 | 41.02396667 | 0.228826333 | 179.2799197 |
| 34 | D02 | 23535 | CG5883  | 39.82573    | 0.197107333 | 202.0509807 |
| 34 | D03 | 33605 | CG13127 | 25.81982    | 0.156204333 | 165.2951583 |
| 34 | D04 | 34309 | CG9933  | 31.74248667 | 0.180846    | 175.5221938 |
| 34 | D05 | 33558 | CG12721 | 37.58856    | 0.168166667 | 223.5196829 |
| 34 | D06 | 34307 | CG9917  | 31.96638333 | 0.168845333 | 189.3234637 |
| 34 | D07 | 33574 | CG12898 | 32.68455    | 0.157867    | 207.0385198 |
| 34 | D08 | 33846 | CG17988 | 33.57946667 | 0.182406667 | 184.0912247 |
| 34 | D09 | 33582 | CG12931 | 32.86513667 | 0.188243    | 174.5888913 |
| 34 | D10 | 33854 | CG18144 | 32.26701667 | 0.169332    | 190.5547485 |
| 34 | D11 | 33590 | CG13012 | 28.42603667 | 0.156265    | 181.9091714 |
| 34 | D12 | 33862 | CG18269 | 34.77609667 | 0.169666333 | 204.9675736 |
| 34 | D13 | 33614 | CG13250 | 37.21307667 | 0.151876667 | 245.0216843 |
| 34 | D14 | 33870 | CG18410 | 32.85350667 | 0.117984    | 278.4573049 |
| 34 | D15 | 33622 | CG13319 | 32.67198667 | 0.152812333 | 213.8046449 |
| 34 | D16 | 33878 | CG18581 | 33.89065    | 0.156978667 | 215.8933486 |
| 34 | D17 | 33630 | CG13417 | 31.28194333 | 0.128603    | 243.2442737 |
| 34 | D18 | 33886 | CG18767 | 38.57392    | 0.12355     | 312.2130312 |
| 34 | D19 | 33638 | CG13467 | 31.77628667 | 0.147345333 | 215.6585889 |
| 34 | D20 | 33894 | CG1908  | 31.64622    | 0.147345667 | 214.7753695 |
| 34 | D21 | 33566 | CG12841 | 32.45462    | 0.115835333 | 280.1789322 |
| 34 | D22 | 33839 | CG17905 | 33.27739667 | 0.126520333 | 263.020147  |
| 34 | D23 | 33598 | CG13075 | 33.73569667 | 0.128958333 | 261.601525  |
| 34 | D24 | 33903 | CG2217  | 32.8427     | 0.103170667 | 318.3336995 |
| 34 | E01 | 23555 | CG5742  | 52.96248    | 0.189277667 | 279.8136776 |
| 34 | E02 | 16740 | CG10095 | 56.59322333 | 0.153463333 | 368.7735833 |
| 34 | E03 | 23504 | CG4971  | 46.01142667 | 0.153288    | 300.1632657 |
| 34 | E04 | 16758 | CG10528 | 46.37904    | 0.131844333 | 351.7712049 |
| 34 | E05 | 23503 | CG4927  | 55.78926333 | 0.149916    | 372.1368188 |
| 34 | E06 | 19401 | CG1888  | 45.89162333 | 0.133644667 | 343.3853702 |
| 34 | E07 | 23474 | CG5810  | 43.88521667 | 0.153612333 | 285.6881066 |
| 34 | E08 | 19406 | CG2144  | 49.02521333 | 0.126833    | 386.5335783 |
| 34 | E09 | 23483 | CG5715  | 46.98225    | 0.123018    | 381.9136224 |
| 34 | E10 | 19407 | CG2260  | 47.95620333 | 0.161556333 | 296.8388942 |
| 34 | E11 | 23500 | CG17367 | 29.97188667 | 0.136783667 | 219.1189006 |
| 34 | E12 | 29523 | CG31188 | 38.25384    | 0.124374    | 307.5710357 |
| 34 | E13 | 24934 | CG12690 | 48.35725667 | 0.132998    | 363.5938636 |
| 34 | E14 | 29525 | CG31218 | 42.71269    | 0.104340333 | 409.3593401 |
| 34 | E15 | 24933 | CG12250 | 38.00854667 | 0.104861667 | 362.4636903 |
| 34 | E16 | 29526 | CG31230 | 38.00848    | 0.095876333 | 396.4323486 |
| 34 | E17 | 24940 | CG12424 | 46.75848667 | 0.11189     | 417.8969226 |
| 34 | E18 | 29527 | CG31246 | 41.84939    | 0.095204    | 439.5759632 |
| 34 | E19 | 24938 | CG12344 | 45.48699667 | 0.108391667 | 419.6540017 |
| 34 | E20 | 29528 | CG31270 | 42.44355333 | 0.098453333 | 431.1032638 |
| 34 | E21 | 24931 | CG12589 | 42.73310333 | 0.094865    | 450.4622709 |
| 34 | E22 | 29582 | CG31181 | 56.85732    | 0.099156667 | 573.4089488 |
| 34 | E23 | 24937 | CG12297 | 54.95476333 | 0.082621    | 665.1428007 |
| 34 | E24 | 29524 | CG31200 | 40.70802667 | 0.092438    | 440.3819497 |
| 34 | F01 | 33600 | CG13083 | 63.67568    | 0.218366667 | 291.5998168 |
| 34 | F02 | NA    | NA      | 46.70978    | 0.192737667 | 242.348996  |
| 34 | F03 | 33606 | CG13128 | 52.83433667 | 0.174425    | 302.905757  |
| 34 | F04 | 34310 | CG9940  | 59.31377    | 0.179997    | 329.5264366 |
| 34 | F05 | 33559 | CG12724 | 44.71612667 | 0.158542667 | 282.0447493 |

|    |     |       |                 |             |             |             |
|----|-----|-------|-----------------|-------------|-------------|-------------|
| 34 | F06 | 34308 | CG9922          | 51.29164667 | 0.147472333 | 347.8052154 |
| 34 | F07 | 33575 | CG12899         | 52.33214333 | 0.152564667 | 343.0161418 |
| 34 | F08 | 33847 | CG17991         | 41.18004    | 0.148491    | 277.3234741 |
| 34 | F09 | 33583 | CG12943         | 50.18108667 | 0.132630667 | 378.3520654 |
| 34 | F10 | 33855 | CG18173         | 36.79244667 | 0.137883    | 266.8381647 |
| 34 | F11 | 33591 | CG13025         | 50.44928    | 0.114787333 | 439.5021518 |
| 34 | F12 | 33863 | CG18316         | 44.99296333 | 0.106937667 | 420.7400885 |
| 34 | F13 | 33615 | CG13285         | 43.32097333 | 0.118965667 | 364.1468547 |
| 34 | F14 | 33871 | CG18418         | 37.68009667 | 0.102175667 | 368.7775954 |
| 34 | F15 | 33623 | CG13332         | 35.82462333 | 0.107086667 | 334.538598  |
| 34 | F16 | 33879 | CG18598         | 46.39235333 | 0.112714667 | 411.5910973 |
| 34 | F17 | 33631 | CG13434         | 51.99184    | 0.109030333 | 476.8566546 |
| 34 | F18 | 33887 | CG1877          | 9.154140333 | 0.065817    | 139.08474   |
| 34 | F19 | 33639 | CG13476         | 44.57953667 | 0.092914    | 479.7935367 |
| 34 | F20 | 33895 | CG1954          | 43.29353667 | 0.094357667 | 458.823731  |
| 34 | F21 | 33567 | CG12845         | 42.1535     | 0.110977667 | 379.8376851 |
| 34 | F22 | 33840 | CG17923         | 41.35842667 | 0.088165333 | 469.1007804 |
| 34 | F23 | 33599 | CG13082         | 44.50449333 | 0.101930667 | 436.6153464 |
| 34 | F24 | 33904 | CG2246          | 45.59599333 | 0.090485333 | 503.9047949 |
| 34 | G01 | 23520 | CG5787          | 39.03518667 | 0.167953    | 232.4173231 |
| 34 | G02 | 16768 | CG10332,CG30182 | 43.98117333 | 0.156029667 | 281.8769935 |
| 34 | G03 | 23511 | CG5873          | 35.42529667 | 0.150179667 | 235.8861053 |
| 34 | G04 | 16813 | CG10208         | 36.11481    | 0.1464      | 246.6858607 |
| 34 | G05 | 23515 | CG4933          | 32.06455667 | 0.199052    | 161.0863325 |
| 34 | G06 | 19413 | CG1896          | 30.72233333 | 0.142682333 | 215.319813  |
| 34 | G07 | 23486 | CG5811          | 30.93805667 | 0.155000333 | 199.5999363 |
| 34 | G08 | 19418 | CG2147          | 35.29733    | 0.127761    | 276.2762502 |
| 34 | G09 | 23518 | CG32096         | 36.29340333 | 0.141772    | 255.9983871 |
| 34 | G10 | NA    | NA              | 39.23568667 | 0.128892667 | 304.4058881 |
| 34 | G11 | 23512 | CG5909          | 40.27161667 | 0.130604333 | 308.3482427 |
| 34 | G12 | 29535 | CG31189         | 33.94195    | 0.128369    | 264.4092421 |
| 34 | G13 | 24946 | CG12702         | 38.95231333 | 0.140144667 | 277.9436011 |
| 34 | G14 | 29537 | CG31219         | 36.52979667 | 0.122899    | 297.2342872 |
| 34 | G15 | 24987 | CG12398         | 34.15027333 | 0.117167333 | 291.4658238 |
| 34 | G16 | 29538 | CG31233         | 36.0459     | 0.098099333 | 367.442864  |
| 34 | G17 | 24952 | CG12433         | 39.18613667 | 0.128775    | 304.2992558 |
| 34 | G18 | 29539 | CG31249         | 33.56475667 | 0.133325667 | 251.7501506 |
| 34 | G19 | 24918 | CG12531         | 35.69717    | 0.099665667 | 358.169179  |
| 34 | G20 | 29540 | CG31272         | 31.02439667 | 0.100223    | 309.553662  |
| 34 | G21 | 24968 | CG12643         | 35.48009667 | 0.114839333 | 308.9542201 |
| 34 | G22 | 29534 | CG31174         | 34.69213    | 0.090023    | 385.3696278 |
| 34 | G23 | 24949 | CG12309         | 32.93449333 | 0.096281333 | 342.0651978 |
| 34 | G24 | 29536 | CG31201         | 37.71628    | 0.096438333 | 391.0922005 |
| 34 | H01 | 33551 | CG12586         | 43.17029    | 0.194635333 | 221.8008892 |
| 34 | H02 | 23506 | CG5675          | 33.25139333 | 0.195312333 | 170.2472791 |
| 34 | H03 | 33607 | CG1316          | 37.76359    | 0.152137667 | 248.2198579 |
| 34 | H04 | 34311 | CG9961          | 33.5222     | 0.165806667 | 202.1764304 |
| 34 | H05 | 33560 | CG12728         | 33.52232333 | 0.154347667 | 217.1871079 |
| 34 | H06 | 34316 | CG9992          | 35.2938     | 0.151927333 | 232.3071117 |
| 34 | H07 | 33576 | CG12900         | 36.08982667 | 0.147496667 | 244.6823205 |
| 34 | H08 | 33848 | CG18012         | 34.43941667 | 0.142374    | 241.8940022 |
| 34 | H09 | 33584 | CG12945         | 20.08202    | 0.106668667 | 188.2654075 |
| 34 | H10 | 33856 | CG18176         | 65.30096667 | 0.137574333 | 474.6595174 |
| 34 | H11 | 33592 | CG13033         | 32.80865    | 0.133624667 | 245.5283955 |

|    |     |       |         |             |             |             |
|----|-----|-------|---------|-------------|-------------|-------------|
| 34 | H12 | 33864 | CG18317 | 32.10719333 | 0.118495    | 270.958212  |
| 34 | H13 | 33616 | CG13289 | 34.11591667 | 0.119617    | 285.2095995 |
| 34 | H14 | 33872 | CG18426 | 35.82576667 | 0.129116667 | 277.4681812 |
| 34 | H15 | 33624 | CG13362 | 26.17802    | 0.108033667 | 242.3135381 |
| 34 | H16 | 33880 | CG18609 | 32.77583    | 0.114586    | 286.0369504 |
| 34 | H17 | 33632 | CG13438 | 31.55177333 | 0.107802667 | 292.6808242 |
| 34 | H18 | 33888 | CG18779 | 34.13036333 | 0.110969    | 307.5666477 |
| 34 | H19 | 33640 | CG13488 | 28.30313667 | 0.107310333 | 263.7503378 |
| 34 | H20 | 33896 | CG1962  | 33.20564667 | 0.096358667 | 344.6046714 |
| 34 | H21 | 33568 | CG12857 | 36.00053    | 0.102612667 | 350.8390452 |
| 34 | H22 | 33841 | CG17927 | 30.15166333 | 0.110651    | 272.493365  |
| 34 | H23 | 23517 | CG5652  | 34.95350667 | 0.107246333 | 325.9179646 |
| 34 | H24 | 33905 | CG2723  | 34.19849    | 0.094973333 | 360.0851818 |
| 34 | I01 | 23532 | CG5789  | 33.85321333 | 0.168034    | 201.4664493 |
| 34 | I02 | 16780 | CG10342 | 39.26882333 | 0.184113    | 213.2865324 |
| 34 | I03 | 23528 | CG4989  | 39.59435    | 0.211290667 | 187.3928017 |
| 34 | I04 | 16825 | CG10209 | 29.52953667 | 0.173483667 | 170.2150827 |
| 34 | I05 | 23527 | CG4934  | 25.31040333 | 0.19178     | 131.9762401 |
| 34 | I06 | 19425 | CG1909  | 31.71217333 | 0.151442333 | 209.4009821 |
| 34 | I07 | 23529 | CG5655  | 34.77595    | 0.153623    | 226.3720276 |
| 34 | I08 | 19430 | CG2206  | 36.20212667 | 0.141790667 | 255.3209426 |
| 34 | I09 | 23507 | CG5724  | 34.31634667 | 0.163473    | 209.9205781 |
| 34 | I10 | NA    | NA      | 32.71473333 | 0.150049667 | 218.0260314 |
| 34 | I11 | 24939 | CG12375 | 36.02940667 | 0.137407    | 262.2093974 |
| 34 | I12 | 29547 | CG31192 | 28.58986667 | 0.125415333 | 227.9614933 |
| 34 | I13 | 24958 | CG13308 | 28.54838    | 0.134024    | 213.009461  |
| 34 | I14 | 29549 | CG31222 | 32.78544    | 0.134267    | 244.1809231 |
| 34 | I15 | 24957 | CG12256 | 30.59364    | 0.148513333 | 205.9992818 |
| 34 | I16 | 29550 | CG31237 | 15.52325333 | 0.080808333 | 192.0996597 |
| 34 | I17 | 25002 | CG12582 | 42.77450667 | 0.120725333 | 354.3125994 |
| 34 | I18 | 29551 | CG31251 | 36.54208333 | 0.114394667 | 319.4386976 |
| 34 | I19 | 24962 | CG12350 | 28.50669    | 0.108208667 | 263.4418377 |
| 34 | I20 | 29552 | CG31278 | 35.77732333 | 0.125034    | 286.1407564 |
| 34 | I21 | 24965 | CG12492 | 35.96019667 | 0.1137      | 316.272618  |
| 34 | I22 | 29546 | CG31176 | 31.67366    | 0.110187667 | 287.4519532 |
| 34 | I23 | 24961 | CG12313 | 32.52710333 | 0.109627667 | 296.7052417 |
| 34 | I24 | 29548 | CG31202 | 31.78615333 | 0.120664333 | 263.4262541 |
| 34 | J01 | 33552 | CG12644 | 39.18287    | 0.167947    | 233.3049712 |
| 34 | J02 | 23530 | CG5685  | 30.37308333 | 0.199274333 | 152.4184416 |
| 34 | J03 | 33608 | CG13162 | 35.24783333 | 0.194715    | 181.0226913 |
| 34 | J04 | 34312 | CG9965  | 33.38785333 | 0.211488    | 157.8711479 |
| 34 | J05 | 33561 | CG12732 | 26.71348667 | 0.174775    | 152.8450103 |
| 34 | J06 | 33910 | CG2948  | 29.03791667 | 0.145261667 | 199.9007538 |
| 34 | J07 | 33577 | CG12901 | 25.89102    | 0.168638333 | 153.5298617 |
| 34 | J08 | 33849 | CG1804  | 32.48096    | 0.151780667 | 213.9993236 |
| 34 | J09 | 33585 | CG12946 | 29.70808    | 0.152739667 | 194.5014065 |
| 34 | J10 | 33857 | CG18210 | 28.90617333 | 0.160994333 | 179.5477688 |
| 34 | J11 | 33593 | CG13036 | 30.03311    | 0.132645667 | 226.4160659 |
| 34 | J12 | 33865 | CG18327 | 29.54102    | 0.135733    | 217.6406622 |
| 34 | J13 | 33617 | CG1331  | 35.32198333 | 0.138811333 | 254.4603707 |
| 34 | J14 | 33873 | CG18446 | 30.40959333 | 0.142250667 | 213.7746982 |
| 34 | J15 | 33625 | CG13364 | 43.43783667 | 0.124809667 | 348.032631  |
| 34 | J16 | 33881 | CG18619 | 30.48745333 | 0.120594333 | 252.8099994 |
| 34 | J17 | 33633 | CG13443 | 31.13257667 | 0.126132    | 246.8253628 |

|    |     |       |         |             |             |             |
|----|-----|-------|---------|-------------|-------------|-------------|
| 34 | J18 | 33889 | CG18806 | 25.10347    | 0.111158667 | 225.8345728 |
| 34 | J19 | 33641 | CG13491 | 30.40834333 | 0.119461667 | 254.5447773 |
| 34 | J20 | 33897 | CG1968  | 24.92416    | 0.111132667 | 224.2739309 |
| 34 | J21 | 33569 | CG12865 | 29.60628    | 0.115094333 | 257.2349059 |
| 34 | J22 | 33842 | CG17928 | 25.75806667 | 0.117964333 | 218.3547004 |
| 34 | J23 | 23480 | CG31380 | 31.05484333 | 0.110215333 | 281.7651809 |
| 34 | J24 | 33906 | CG2909  | 28.64718    | 0.105309    | 272.029741  |
| 34 | K02 | 16812 | CG10157 | 19.39373667 | 0.180895667 | 107.2095149 |
| 34 | K03 | 23540 | CG4991  | 30.88208    | 0.173194333 | 178.3088361 |
| 34 | K04 | 19381 | CG1942  | 27.53582333 | 0.178402    | 154.3470552 |
| 34 | K05 | 23539 | CG4938  | 34.52383667 | 0.170097333 | 202.9651846 |
| 34 | K06 | NA    | NA      | 24.8791     | 0.156819    | 158.6485056 |
| 34 | K07 | 23510 | CG5828  | 27.54281    | 0.151070333 | 182.3177946 |
| 34 | K08 | 19442 | CG2207  | 24.53136333 | 0.194011    | 126.443157  |
| 34 | K09 | 23546 | CG5836  | 28.47917333 | 0.155906    | 182.6688731 |
| 34 | K1  | 23544 | CG5796  | 21.00831333 | 0.166450333 | 126.2137054 |
| 34 | K10 | 19443 | CG2310  | 25.22113667 | 0.158791    | 158.8322806 |
| 34 | K11 | 24955 | CG12622 | 30.15267    | 0.156465    | 192.7119164 |
| 34 | K12 | 29559 | CG31193 | 26.74103667 | 0.129611333 | 206.3171173 |
| 34 | K13 | 24970 | CG13315 | 24.59690667 | 0.134145667 | 183.3596811 |
| 34 | K14 | 29561 | CG31223 | 26.45609    | 0.131511667 | 201.1691485 |
| 34 | K15 | 24969 | CG12259 | 29.80776667 | 0.129453667 | 230.2581876 |
| 34 | K16 | 29562 | CG31238 | 24.12258    | 0.116358667 | 207.3122758 |
| 34 | K17 | 24976 | CG12446 | 28.07608    | 0.124033667 | 226.3585424 |
| 34 | K18 | 29563 | CG31262 | 24.48928333 | 0.113296333 | 216.1524792 |
| 34 | K19 | 24942 | CG12540 | 29.12463333 | 0.115848667 | 251.4024043 |
| 34 | K20 | 29564 | CG31279 | 27.07929333 | 0.127298667 | 212.7225213 |
| 34 | K21 | 24977 | CG12498 | 28.61319667 | 0.11331     | 252.521372  |
| 34 | K22 | 29558 | CG31178 | 26.85808667 | 0.096185333 | 279.2326619 |
| 34 | K23 | 24992 | CG12653 | 32.11276333 | 0.118494667 | 271.0059806 |
| 34 | K24 | 29584 | CG31206 | 27.96175    | 0.111487333 | 250.8065191 |
| 34 | L01 | 33553 | CG12654 | 35.36769667 | 0.2148      | 164.6540813 |
| 34 | L02 | 23558 | CG5837  | 28.85318333 | 0.194785667 | 148.1278568 |
| 34 | L03 | 33609 | CG13171 | 30.57552333 | 0.181651333 | 168.3198398 |
| 34 | L04 | 34313 | CG9969  | 27.41860667 | 0.175929    | 155.8504094 |
| 34 | L05 | 33562 | CG12814 | 22.63944333 | 0.16342     | 138.5353282 |
| 34 | L06 | 33911 | CG2955  | 26.9459     | 0.167403667 | 160.9636189 |
| 34 | L07 | 33578 | CG12906 | 25.78156333 | 0.158175667 | 162.9932333 |
| 34 | L08 | 33850 | CG18048 | 25.57481667 | 0.170818333 | 149.71939   |
| 34 | L09 | 33586 | CG12950 | 28.55245667 | 0.147110333 | 194.0887225 |
| 34 | L10 | 33858 | CG18231 | 24.03519    | 0.143258667 | 167.774771  |
| 34 | L11 | 33594 | CG13048 | 25.98083667 | 0.117881333 | 220.3982253 |
| 34 | L12 | 33866 | CG18348 | 27.4229     | 0.138892333 | 197.4399835 |
| 34 | L13 | 33618 | CG13311 | 27.19202667 | 0.146324    | 185.8343585 |
| 34 | L14 | 33874 | CG18471 | 31.37960333 | 0.136267667 | 230.2791565 |
| 34 | L15 | 33626 | CG13365 | 24.70886333 | 0.136332    | 181.2403789 |
| 34 | L16 | 33882 | CG18622 | 29.25812    | 0.116796333 | 250.5054668 |
| 34 | L17 | 33634 | CG13446 | 30.59264667 | 0.127571    | 239.8087862 |
| 34 | L18 | 33890 | CG18815 | 26.96783333 | 0.131185667 | 205.5699683 |
| 34 | L19 | 33642 | CG13493 | 25.02528    | 0.115389    | 216.8775187 |
| 34 | L20 | 33898 | CG1983  | 25.89738667 | 0.123077667 | 210.4149954 |
| 34 | L21 | 33570 | CG12872 | 30.04005333 | 0.119647    | 251.0723489 |
| 34 | L22 | 33843 | CG17932 | 25.69909    | 0.117486    | 218.7417224 |
| 34 | L23 | 23564 | CG5637  | 33.58555    | 0.113927    | 294.7988624 |



|    |     |       |               |             |             |             |
|----|-----|-------|---------------|-------------|-------------|-------------|
| 34 | L24 | 33907 | CG2924        | 25.02028333 | 0.100121667 | 249.8987898 |
| 34 | M01 | 23556 | CG5799        | 27.80810667 | 0.203318333 | 136.77127   |
| 34 | M02 | 16824 | CG10165       | 55.43405    | 0.192591667 | 287.832028  |
| 34 | M03 | 23547 | CG5893        | 28.60835333 | 0.155957333 | 183.4370512 |
| 34 | M04 | 19417 | CG1989        | 41.81150667 | 0.189853333 | 220.2305639 |
| 34 | M05 | 23551 | CG4950        | 29.44462667 | 0.149846    | 196.4992503 |
| 34 | M06 | 19449 | CG1140,CG1927 | 28.54433667 | 0.147446    | 193.5918008 |
| 34 | M07 | 23522 | CG5830        | 17.88167    | 0.126312333 | 141.5670943 |
| 34 | M08 | 19429 | CG2042        | 30.66927    | 0.144298333 | 212.5407085 |
| 34 | M09 | 23554 | CG5688        | 24.02564333 | 0.142623667 | 168.4548147 |
| 34 | M10 | 19455 | CG2336        | 25.00932333 | 0.133378667 | 187.5061729 |
| 34 | M11 | 24963 | CG12390       | 38.29665333 | 0.136010667 | 281.5709552 |
| 34 | M12 | 29571 | CG31195       | 26.38002667 | 0.141403667 | 186.5582929 |
| 34 | M13 | 24932 | CG12637       | 28.82977667 | 0.132729    | 217.2078194 |
| 34 | M14 | 29573 | CG31225       | 28.03325333 | 0.115981333 | 241.704872  |
| 34 | M15 | 24981 | CG33213       | 28.17951667 | 0.120462667 | 233.9273855 |
| 34 | M16 | 29574 | CG31240       | 24.06113    | 0.115087333 | 209.0684466 |
| 34 | M17 | 24988 | CG12455       | 30.86882    | 0.112066667 | 275.4505057 |
| 34 | M18 | 29575 | CG31263       | 28.72294667 | 0.10406     | 276.0229355 |
| 34 | M19 | 24986 | CG12361       | 25.09666    | 0.120568333 | 208.1529976 |
| 34 | M20 | 29557 | CG31158       | 19.58906333 | 0.12284     | 159.4681157 |
| 34 | M21 | 24989 | CG12499       | 36.08259667 | 0.153866333 | 234.5061189 |
| 34 | M22 | 29570 | CG31179       | 27.29643333 | 0.114864667 | 237.6399473 |
| 34 | M23 | 24985 | CG33121       | 27.31643333 | 0.100641    | 271.4245023 |
| 34 | M24 | 29572 | CG31205       | 29.42749667 | 0.114174    | 257.7425392 |
| 34 | N01 | 33554 | CG12662       | 36.59632667 | 0.239103667 | 153.0563173 |
| 34 | N02 | 23499 | CG5863        | 26.44327333 | 0.192809    | 137.1475052 |
| 34 | N03 | 33556 | CG12681       | 30.29580333 | 0.179801    | 168.4963005 |
| 34 | N04 | 34314 | CG9972        | 41.32626    | 0.190179    | 217.3019103 |
| 34 | N05 | 33563 | CG12816       | 26.99813    | 0.152680333 | 176.8278167 |
| 34 | N06 | 33912 | CG2958        | 29.79550667 | 0.146146667 | 203.8740078 |
| 34 | N07 | 33579 | CG12907       | 29.67142    | 0.137651    | 215.5554264 |
| 34 | N08 | 33851 | CG18087       | 33.61864667 | 0.153785667 | 218.6071524 |
| 34 | N09 | 33587 | CG12953       | 45.28981667 | 0.130926    | 345.9191961 |
| 34 | N10 | 33859 | CG18249       | 29.28283333 | 0.137174667 | 213.4711463 |
| 34 | N11 | 33595 | CG13050       | 26.17832667 | 0.128674    | 203.446902  |
| 34 | N12 | 33867 | CG18371       | 27.63736333 | 0.130888667 | 211.1516913 |
| 34 | N13 | 33619 | CG13312       | 30.94949667 | 0.133326667 | 232.1328316 |
| 34 | N14 | 33875 | CG18536       | 24.31812333 | 0.123026333 | 197.666001  |
| 34 | N15 | 33627 | CG1338        | 25.37878333 | 0.126112667 | 201.2389715 |
| 34 | N16 | 33883 | CG18631       | 28.03105333 | 0.131866667 | 212.571183  |
| 34 | N17 | 33635 | CG13449       | 27.64957333 | 0.124684333 | 221.756596  |
| 34 | N18 | 33891 | CG1884        | 57.7325     | 0.150642    | 383.2430531 |
| 34 | N19 | 33643 | CG13565       | 25.15207333 | 0.124615333 | 201.8377086 |
| 34 | N20 | 33899 | CG2095        | 23.04775    | 0.112408333 | 205.0359552 |
| 34 | N21 | 33571 | CG12873       | 25.92021333 | 0.118442    | 218.8430906 |
| 34 | N22 | 33844 | CG17952       | 25.00834    | 0.115107    | 217.2616783 |
| 34 | N23 | 23545 | CG4815        | 30.41784333 | 0.111223333 | 273.4843708 |
| 34 | N24 | 33908 | CG2928        | 25.67756    | 0.103542667 | 247.9901361 |
| 34 | O01 | 23538 | CG4908        | 37.8175     | 0.203109333 | 186.1928223 |
| 34 | O02 | 16814 | CG10306       | 46.30903333 | 0.215052667 | 215.3381032 |
| 34 | O03 | 23550 | CG4914        | 27.97743    | 0.144982667 | 192.9708609 |
| 34 | O04 | NA    | NA            | 45.75674333 | 0.187853333 | 243.5769572 |
| 34 | O05 | 23560 | CG5916        | 33.09144    | 0.163669    | 202.185142  |

|    |     |       |          |             |             |             |
|----|-----|-------|----------|-------------|-------------|-------------|
| 34 | O06 | 19461 | CG30337  | 30.99371667 | 0.208765    | 148.4622263 |
| 34 | O07 | 23565 | CG5662   | 32.17157    | 0.174153    | 184.731644  |
| 34 | O08 | 19466 | CG2247   | 31.27432667 | 0.159093    | 196.5788983 |
| 34 | O09 | 23566 | CG5707   | 33.55618667 | 0.163016667 | 205.8451283 |
| 34 | O10 | 29581 | CG31164  | 29.88653667 | 0.140728333 | 212.37043   |
| 34 | O11 | 24975 | CG12395  | 30.87509    | 0.150181333 | 205.5854034 |
| 34 | O12 | 29583 | CG31196  | 31.56675667 | 0.166586333 | 189.4918751 |
| 34 | O13 | 24956 | CG12640  | 40.98462667 | 0.155954333 | 262.7988963 |
| 34 | O14 | 29585 | CG31226  | 29.17605    | 0.134020333 | 217.6986825 |
| 34 | O15 | 24993 | CG12272  | 28.75036    | 0.121785    | 236.0747218 |
| 34 | O16 | 29586 | CG31241  | 29.94358    | 0.145805667 | 205.3663666 |
| 34 | O17 | 25003 | CG12630  | 29.97771    | 0.135171    | 221.7761946 |
| 34 | O18 | 29587 | CG31265  | 28.67834333 | 0.134866333 | 212.6427154 |
| 34 | O19 | 24966 | CG12548  | 32.49171333 | 0.132930667 | 244.4260166 |
| 34 | O20 | 29569 | CG31161  | 34.50221667 | 0.115629    | 298.387227  |
| 34 | O21 |       | wts      | 115.9708333 | 0.09591     | 1209.163104 |
| 34 | O22 |       | HFA17794 | 2.714212667 | 0.015089    | 179.8802218 |
| 34 | O23 |       | hpo      | 83.54895667 | 0.097953    | 852.9494417 |
| 34 | O24 |       | Luc      | 4.161814667 | 0.109598667 | 37.97322352 |
| 34 | P01 | 33555 | CG12680  | 39.60459333 | 0.249372    | 158.8173224 |
| 34 | P02 | 23498 | CG5819   | 38.89806    | 0.234372    | 165.9671804 |
| 34 | P03 | 33612 | CG1324   | 30.89238667 | 0.191202667 | 161.5688066 |
| 34 | P04 | 34315 | CG9983   | 23.02721667 | 0.833773667 | 27.61806661 |
| 34 | P05 | 33564 | CG12818  | 39.01542333 | 0.18953     | 205.85355   |
| 34 | P06 | 33913 | CG2962   | 27.13132333 | 0.179442667 | 151.197727  |
| 34 | P07 | 33580 | CG12913  | 32.87555667 | 0.179636333 | 183.011733  |
| 34 | P08 | 33852 | CG18105  | 34.31884    | 0.188487667 | 182.0747246 |
| 34 | P09 | 33588 | CG12958  | 30.69741667 | 0.157160333 | 195.3254744 |
| 34 | P10 | 33860 | CG18258  | 28.80111    | 0.161763667 | 178.0443693 |
| 34 | P11 | 33596 | CG13071  | 31.36978    | 0.153991333 | 203.7113344 |
| 34 | P12 | 33868 | CG1838   | 25.30955    | 0.130464667 | 193.9954368 |
| 34 | P13 | 33620 | CG13313  | 27.40671    | 0.144050667 | 190.2574326 |
| 34 | P14 | 33876 | CG18548  | 24.6345     | 0.116752333 | 210.9979244 |
| 34 | P15 | 33628 | CG13385  | 28.78318    | 0.145149    | 198.3009184 |
| 34 | P16 | 33884 | CG1865   | 24.32758667 | 0.129055333 | 188.5050857 |
| 34 | P17 | 33636 | CG13462  | 27.14242667 | 0.128314333 | 211.5307461 |
| 34 | P18 | 33892 | CG1889   | 26.97969    | 0.120779333 | 223.3800209 |
| 34 | P19 | 33644 | CG1359   | 31.67534333 | 0.131424667 | 241.0152077 |
| 34 | P20 | 33900 | CG2124   | 28.27060667 | 0.117579667 | 240.4378875 |
| 34 | P21 |       | wts      | 104.6438233 | 0.116134    | 901.0610444 |
| 34 | P22 |       | HFA17794 | 2.158939    | 0.015142333 | 142.5763753 |
| 34 | P23 |       | hpo      | 71.62451667 | 0.097313    | 736.02208   |
| 34 | P24 |       | Luc      | 3.486695667 | 0.110495333 | 31.55513958 |
| 35 | A01 |       | DIAP1    | 1.261724    | 0.014753333 | 85.52128333 |
| 35 | A02 |       | ex/ft    | 100.09629   | 0.154420667 | 648.2052705 |
| 35 | A03 |       | Luc      | 4.2218      | 0.139612333 | 30.23944876 |
| 35 | A04 |       | hpo      | 81.33477    | 0.132255667 | 614.9813619 |
| 35 | A05 | 33914 | CG2964   | 27.63643667 | 0.150784667 | 183.2841315 |
| 35 | A06 | 34413 | CG14330  | 31.80433    | 0.135264    | 235.1278241 |
| 35 | A07 | 34325 | CG10975  | 36.70885667 | 0.157143667 | 233.6006118 |
| 35 | A08 | 34429 | CG15394  | 26.93396333 | 0.140973333 | 191.0571503 |
| 35 | A09 | 34389 | CG14127  | 28.43737    | 0.151121    | 188.1761635 |
| 35 | A10 | 34469 | CG17843  | 29.44713333 | 0.139178667 | 211.5779238 |
| 35 | A11 | 34397 | CG14149  | 29.5207     | 0.140008    | 210.8500943 |

|    |     |       |         |             |             |             |
|----|-----|-------|---------|-------------|-------------|-------------|
| 35 | A12 | 34485 | CG32271 | 27.83746    | 0.135029333 | 206.1586124 |
| 35 | A13 | 34405 | CG14277 | 32.42726333 | 0.142311    | 227.8619596 |
| 35 | A14 | 34493 | CG32459 | 26.98311667 | 0.113268333 | 238.2229514 |
| 35 | A15 | 34317 | CG10244 | 28.32368667 | 0.1258      | 225.1485427 |
| 35 | A16 | 34421 | CG14619 | 21.62829333 | 0.144946    | 149.2162139 |
| 35 | A17 | 34333 | CG11621 | 14.86556    | 0.100042    | 148.5931909 |
| 35 | A18 | 34461 | CG17612 | 31.45731    | 0.110029333 | 285.8993056 |
| 35 | A19 | 34341 | CG12232 | 27.88050333 | 0.115109333 | 242.2088855 |
| 35 | A20 | 34501 | CG3701  | 30.64492    | 0.115760667 | 264.7265335 |
| 35 | A21 | 34365 | CG14006 | 26.92375    | 0.116188333 | 231.7250728 |
| 35 | A22 | 34437 | CG16993 | 34.14864667 | 0.109307667 | 312.4085227 |
| 35 | A23 | 34373 | CG14060 | 33.90858    | 0.124728    | 271.8602078 |
| 35 | A24 | 34509 | CG40335 | 30.54340333 | 0.111214333 | 274.6354936 |
| 35 | B01 |       | DIAP1   | 1.031512667 | 0.014349333 | 71.88575544 |
| 35 | B02 |       | ex/ft   | 89.70356667 | 0.157147667 | 570.8234081 |
| 35 | B03 |       | Luc     | 4.366751    | 0.205674    | 21.23141963 |
| 35 | B04 |       | hpo     | 84.23660333 | 0.137745    | 611.540189  |
| 35 | B05 | 33125 | CG1674  | 32.47386667 | 0.180290667 | 180.1195107 |
| 35 | B06 | 34593 | CG11221 | 42.21773333 | 0.156294333 | 270.1168522 |
| 35 | B07 | 33133 | CG17191 | 32.11156    | 0.164967667 | 194.6536594 |
| 35 | B08 | 34601 | CG13337 | 35.22793667 | 0.148445667 | 237.3119907 |
| 35 | B09 | 33141 | CG17523 | 31.93470333 | 0.152961333 | 208.7763138 |
| 35 | B10 | 34617 | CG2233  | 32.63101    | 0.144022    | 226.5696213 |
| 35 | B11 | 33119 | CG15883 | 24.99722667 | 0.163584333 | 152.8094174 |
| 35 | B12 | 34633 | CG33070 | 32.33836333 | 0.149997667 | 215.5924425 |
| 35 | B13 | 34565 | CG7936  | 33.91921667 | 0.131254    | 258.4242512 |
| 35 | B14 | 34641 | CG3651  | 26.52135667 | 0.114228667 | 232.1777662 |
| 35 | B15 | 34517 | CG4269  | 29.36844    | 0.131508333 | 223.3199924 |
| 35 | B16 | 34649 | CG5664  | 36.87039    | 0.118048667 | 312.3321173 |
| 35 | B17 | 34525 | CG4597  | 32.32646667 | 0.122559333 | 263.7617698 |
| 35 | B18 | 34657 | CG6703  | 28.46298333 | 0.125424667 | 226.9329    |
| 35 | B19 | 34573 | CG8248  | 32.34228    | 0.116098    | 278.5774087 |
| 35 | B20 | 34673 | CG8516  | 24.28787333 | 0.11559     | 210.120887  |
| 35 | B21 | 34533 | CG5375  | 26.55734667 | 0.113544667 | 233.893387  |
| 35 | B22 | 34625 | CG32306 | 29.89053333 | 0.108372    | 275.8141709 |
| 35 | B23 | 34557 | CG7296  | 33.93432667 | 0.10891     | 311.5813669 |
| 35 | B24 | 34588 | CG11049 | 31.51657    | 0.096385    | 326.986253  |
| 35 | C01 | 33917 | CG30007 | 55.90571    | 0.289289667 | 193.2516659 |
| 35 | C02 | 34412 | CG14327 | 32.55388667 | 0.131493333 | 247.5706246 |
| 35 | C03 | 33925 | CG3019  | 40.31396333 | 0.142356667 | 283.1898518 |
| 35 | C04 | 34453 | CG17325 | 35.56380333 | 0.159105333 | 223.5236405 |
| 35 | C05 | 33915 | CG2973  | 27.4377     | 0.184944667 | 148.3562651 |
| 35 | C06 | 34414 | CG14331 | 35.50359    | 0.151181    | 234.8416137 |
| 35 | C07 | 34326 | CG11027 | 9.313329    | 0.159737333 | 58.30402202 |
| 35 | C08 | 34430 | CG15396 | 31.3601     | 0.127404333 | 246.1462588 |
| 35 | C09 | 34390 | CG14129 | 6.510775333 | 0.071829667 | 90.64187035 |
| 35 | C10 | 34470 | CG17849 | 33.76954667 | 0.135134333 | 249.8961281 |
| 35 | C11 | 34398 | CG14151 | 33.36660667 | 0.130892667 | 254.9157834 |
| 35 | C12 | 34486 | CG32280 | 34.30094    | 0.138174333 | 248.2439334 |
| 35 | C13 | 34406 | CG14280 | 37.88767667 | 0.125646667 | 301.541439  |
| 35 | C14 | 34494 | CG3250  | 32.11638667 | 0.135344667 | 237.2933301 |
| 35 | C15 | 34318 | CG10376 | 32.74242333 | 0.116804    | 280.3193669 |
| 35 | C16 | 34422 | CG14895 | 41.72400333 | 0.107047333 | 389.7715341 |
| 35 | C17 | 34334 | CG12069 | 32.53482667 | 0.125854    | 258.5124562 |

|    |     |       |         |             |             |             |
|----|-----|-------|---------|-------------|-------------|-------------|
| 35 | C18 | 34462 | CG17623 | 33.42947333 | 0.094815    | 352.5757879 |
| 35 | C19 | 34342 | CG12252 | 32.16996333 | 0.109012667 | 295.102985  |
| 35 | C20 | 34502 | CG3779  | 31.6718     | 0.101885333 | 310.8573036 |
| 35 | C21 | 34366 | CG14007 | 31.99110333 | 0.117716667 | 271.7635849 |
| 35 | C22 | 34438 | CG17028 | 36.45737667 | 0.108303    | 336.6238855 |
| 35 | C23 | 34374 | CG14067 | 33.22943    | 0.132219667 | 251.3198742 |
| 35 | C24 | 34510 | CG40342 | 31.62399333 | 0.096245667 | 328.5757627 |
| 35 | D01 | 33157 | CG18243 | 51.18903    | 0.216114    | 236.8612399 |
| 35 | D02 | 34609 | CG15138 | 37.58257333 | 0.173246667 | 216.931004  |
| 35 | D03 | 33149 | CG17941 | 37.68898    | 0.170944333 | 220.4751644 |
| 35 | D04 | 34665 | CG7994  | 30.15817    | 0.196383667 | 153.5676083 |
| 35 | D05 | 33126 | CG16766 | 31.01729667 | 0.175071667 | 177.1691403 |
| 35 | D06 | 34594 | CG11628 | 24.96497    | 0.15124     | 165.0685665 |
| 35 | D07 | 33134 | CG17192 | 30.67502333 | 0.17072     | 179.6803147 |
| 35 | D08 | 34602 | CG13422 | 36.66837    | 0.155506333 | 235.7998495 |
| 35 | D09 | 33142 | CG1756  | 35.39743667 | 0.148812    | 237.8668163 |
| 35 | D10 | 34618 | CG30084 | 20.85319667 | 0.120324    | 173.3087054 |
| 35 | D11 | 33120 | CG15904 | 29.20895333 | 0.144836667 | 201.668224  |
| 35 | D12 | 34634 | CG33111 | 34.11728    | 0.122242333 | 279.0954579 |
| 35 | D13 | 34566 | CG7939  | 4.758497667 | 0.16635     | 28.60533614 |
| 35 | D14 | 34642 | CG3821  | 31.40785667 | 0.147550333 | 212.8619838 |
| 35 | D15 | 34518 | CG4281  | 29.64155    | 0.10972     | 270.156307  |
| 35 | D16 | 34650 | CG5681  | 40.41561333 | 0.116015333 | 348.3644116 |
| 35 | D17 | 34526 | CG4763  | 31.18994    | 0.115772667 | 269.4067684 |
| 35 | D18 | 34658 | CG6720  | 29.88239333 | 0.134766667 | 221.7343062 |
| 35 | D19 | 34584 | CG9836  | 23.27054    | 0.108120333 | 215.2281563 |
| 35 | D20 | 34674 | CG8661  | 32.53822333 | 0.112834667 | 288.3708021 |
| 35 | D21 | 34556 | CG7266  | 34.97315667 | 0.107223333 | 326.1711381 |
| 35 | D22 | 34626 | CG32332 | 28.76478667 | 0.106911667 | 269.0518964 |
| 35 | D23 | 34558 | CG7299  | 33.5052     | 0.104896333 | 319.4124993 |
| 35 | D24 | 34589 | CG11068 | 34.37072333 | 0.096757    | 355.2272532 |
| 35 | E01 | 33918 | CG3001  | 37.96808667 | 0.160165    | 237.0560776 |
| 35 | E02 | 34445 | CG17174 | 51.76070667 | 0.161939333 | 319.6302319 |
| 35 | E03 | 33926 | CG3021  | 37.43914333 | 0.145728    | 256.9111175 |
| 35 | E04 | 34454 | CG17344 | 52.69296667 | 0.131817    | 399.743331  |
| 35 | E05 | 33916 | CG2990  | 47.84667    | 0.131888333 | 362.7816714 |
| 35 | E06 | 34415 | CG14332 | 47.78643667 | 0.120354    | 397.049011  |
| 35 | E07 | 34327 | CG11033 | 39.27907667 | 0.118259    | 332.144502  |
| 35 | E08 | 34431 | CG15411 | 43.41317667 | 0.115094667 | 377.1953812 |
| 35 | E09 | 34391 | CG14131 | 46.09710333 | 0.160763333 | 286.7389123 |
| 35 | E10 | 34471 | CG18624 | 53.99538667 | 0.157802    | 342.1717511 |
| 35 | E11 | 34399 | CG14162 | 41.95924    | 0.115502333 | 363.2761243 |
| 35 | E12 | 34487 | CG32320 | 48.21610667 | 0.108385333 | 444.8582219 |
| 35 | E13 | 34407 | CG14297 | 49.06308333 | 0.126367333 | 388.2576457 |
| 35 | E14 | 34495 | CG32793 | 35.37248    | 0.115069333 | 307.4014507 |
| 35 | E15 | 34319 | CG10426 | 44.25047333 | 0.094083    | 470.334421  |
| 35 | E16 | 34423 | CG15069 | 43.45820333 | 0.089591    | 485.0733147 |
| 35 | E17 | 34335 | CG12123 | 43.29052    | 0.089396333 | 484.2538657 |
| 35 | E18 | 34463 | CG17669 | 35.36177333 | 0.101004667 | 350.1003914 |
| 35 | E19 | 34343 | CG13062 | 36.23325333 | 0.108752333 | 333.1721925 |
| 35 | E20 | 34503 | CG3961  | 38.47149    | 0.108779    | 353.6665165 |
| 35 | E21 | 34367 | CG14011 | 43.41615    | 0.097649333 | 444.6128664 |
| 35 | E22 | 34439 | CG17042 | 35.22369    | 0.086683    | 406.3506108 |
| 35 | E23 | 34375 | CG14068 | 39.86609    | 0.086766333 | 459.4649614 |

|    |     |       |         |             |             |             |
|----|-----|-------|---------|-------------|-------------|-------------|
| 35 | E24 | 34511 | CG4074  | 37.15228667 | 0.087507333 | 424.5619796 |
| 35 | F01 | 33156 | CG1824  | 60.20894333 | 0.169913333 | 354.3509044 |
| 35 | F02 | 34610 | CG15326 | 49.31333667 | 0.150708    | 327.2111412 |
| 35 | F03 | 33150 | CG18000 | 34.95299667 | 0.166568333 | 209.8417867 |
| 35 | F04 | 34666 | CG8004  | 46.14021    | 0.139781667 | 330.0877082 |
| 35 | F05 | 33127 | CG16812 | 49.22167333 | 0.140303    | 350.8240974 |
| 35 | F06 | 34595 | CG11648 | 43.25786667 | 0.139327667 | 310.4757849 |
| 35 | F07 | 33135 | CG17224 | 37.85536667 | 0.180886667 | 209.276711  |
| 35 | F08 | 34603 | CG13475 | 41.94602    | 0.134734    | 311.3246842 |
| 35 | F09 | 33143 | CG17726 | 36.45446    | 0.121262667 | 300.6239348 |
| 35 | F10 | 34619 | CG30418 | 38.32944667 | 0.117668333 | 325.7413918 |
| 35 | F11 | 33121 | CG1643  | 48.03444667 | 0.115542    | 415.73148   |
| 35 | F12 | 34635 | CG33208 | 38.46724    | 0.098019    | 392.4467705 |
| 35 | F13 | 34567 | CG7945  | 45.41865667 | 0.116366667 | 390.3064165 |
| 35 | F14 | 34643 | CG4218  | 41.52906333 | 0.102870667 | 403.7017031 |
| 35 | F15 | 34519 | CG4336  | 48.89826333 | 0.113117667 | 432.2778641 |
| 35 | F16 | 34651 | CG5721  | 47.63068333 | 0.113999333 | 417.8154551 |
| 35 | F17 | 34527 | CG4788  | 47.15634333 | 0.098178667 | 480.3115069 |
| 35 | F18 | 34659 | CG6923  | 38.65907667 | 0.091851    | 420.8890123 |
| 35 | F19 | 34575 | CG8327  | 36.28303    | 0.095921    | 378.2595052 |
| 35 | F20 | 34675 | CG8773  | 43.42827    | 0.093935333 | 462.3209229 |
| 35 | F21 | 34535 | CG5399  | 40.31216    | 0.102933667 | 391.6324105 |
| 35 | F22 | 34627 | CG3239  | 36.94054667 | 0.095410667 | 387.1741804 |
| 35 | F23 | 34559 | CG7363  | 35.96249333 | 0.089750333 | 400.6948164 |
| 35 | F24 | 34590 | CG11169 | 39.46017    | 0.088917333 | 443.7849013 |
| 35 | G01 | 33919 | CG30017 | 35.79411333 | 0.124161    | 288.287895  |
| 35 | G02 | 34446 | CG17177 | 36.99854667 | 0.146417    | 252.6929705 |
| 35 | G03 | 33927 | CG30217 | 43.84948667 | 0.133450667 | 328.5819978 |
| 35 | G04 | 34478 | CG32055 | 37.68604667 | 0.143260333 | 263.059884  |
| 35 | G05 | 33932 | CG3090  | 38.34819    | 0.123775667 | 309.8201047 |
| 35 | G06 | 34416 | CG14343 | 37.13195667 | 0.133261667 | 278.6394437 |
| 35 | G07 | 34328 | CG11420 | 32.30533667 | 0.137575667 | 234.8186816 |
| 35 | G08 | 34432 | CG15414 | 34.86304333 | 0.132169667 | 263.7749206 |
| 35 | G09 | 34392 | CG14132 | 39.53672333 | 0.126302333 | 313.0324064 |
| 35 | G10 | 34472 | CG2471  | 31.06119333 | 0.104044333 | 298.5380591 |
| 35 | G11 | 34400 | CG14163 | 38.08314667 | 0.114842667 | 331.6114801 |
| 35 | G12 | 34488 | CG32350 | 49.47634    | 0.137417333 | 360.0443903 |
| 35 | G13 | 34408 | CG14305 | 33.52942    | 0.096245    | 348.3757078 |
| 35 | G14 | 34496 | CG33193 | 56.57185    | 0.099305667 | 569.673936  |
| 35 | G15 | 34320 | CG10493 | 40.41476667 | 0.109334667 | 369.6427483 |
| 35 | G16 | 34424 | CG15072 | 41.37974    | 0.107665667 | 384.3355201 |
| 35 | G17 | 34336 | CG12135 | 36.48322333 | 0.142916    | 255.277389  |
| 35 | G18 | 34464 | CG17681 | 37.74869    | 0.100563667 | 375.3710585 |
| 35 | G19 | 34344 | CG13375 | 29.42478667 | 0.092359    | 318.5914385 |
| 35 | G20 | 34504 | CG3979  | 29.29300333 | 0.096900333 | 302.3003361 |
| 35 | G21 | 34368 | CG14035 | 31.49284    | 0.095610667 | 329.3862609 |
| 35 | G22 | 34440 | CG17047 | 29.09284333 | 0.082065333 | 354.5083186 |
| 35 | G23 | 34376 | CG14072 | 30.26362667 | 0.090641    | 333.8845188 |
| 35 | G24 | 34512 | CG4090  | 38.24375667 | 0.086411333 | 442.5780183 |
| 35 | H01 | 33159 | CG18340 | 45.40954667 | 0.153761    | 295.325516  |
| 35 | H02 | 34616 | CG2086  | 44.42266667 | 0.163803    | 271.1956842 |
| 35 | H03 | 33151 | CG1806  | 31.61998667 | 0.158115667 | 199.980099  |
| 35 | H04 | 34632 | CG32859 | 36.37415667 | 0.161518    | 225.2018764 |
| 35 | H05 | 33128 | CG16852 | 33.73715333 | 0.152916667 | 220.624436  |

|    |     |       |         |             |             |             |
|----|-----|-------|---------|-------------|-------------|-------------|
| 35 | H06 | 34596 | CG12497 | 37.30237333 | 0.127779    | 291.928825  |
| 35 | H07 | 33136 | CG17300 | 38.87928333 | 0.143846667 | 270.2828243 |
| 35 | H08 | 34604 | CG13490 | 34.36743667 | 0.146745    | 234.1983486 |
| 35 | H09 | 33144 | CG1776  | 35.06770333 | 0.119898333 | 292.4786555 |
| 35 | H10 | 34620 | CG31531 | 32.96811667 | 0.125828333 | 262.0086891 |
| 35 | H11 | 33122 | CG1651  | 31.21226667 | 0.113654333 | 274.6245194 |
| 35 | H12 | 34636 | CG33209 | 30.60088    | 0.105563    | 289.8826293 |
| 35 | H13 | 34568 | CG7955  | 32.01364667 | 0.120867333 | 264.8659963 |
| 35 | H14 | 34644 | CG4494  | 26.27726    | 0.471091667 | 55.77950505 |
| 35 | H15 | 34520 | CG4346  | 36.11370667 | 0.126585333 | 285.2913976 |
| 35 | H16 | 34652 | CG6013  | 29.1529     | 0.123695333 | 235.6831031 |
| 35 | H17 | 34528 | CG4983  | 33.26508667 | 0.090790667 | 366.3932416 |
| 35 | H18 | 34660 | CG6944  | 37.09935667 | 0.077408    | 479.2703166 |
| 35 | H19 | 34576 | CG8409  | 28.18643    | 0.095721    | 294.4644331 |
| 35 | H20 | 34676 | CG8861  | 38.61055667 | 0.084327667 | 457.8634533 |
| 35 | H21 | 34536 | CG5597  | 32.20514    | 0.100572    | 320.2197431 |
| 35 | H22 | 34628 | CG32423 | 39.49369333 | 0.126189667 | 312.9708983 |
| 35 | H23 | 34564 | CG7863  | 38.56877333 | 0.093095    | 414.2947885 |
| 35 | H24 | 34591 | CG11176 | 62.06412333 | 0.092063    | 674.1483911 |
| 35 | I01 | 33920 | CG30029 | 40.70403333 | 0.165502667 | 245.9418579 |
| 35 | I02 | 34447 | CG17208 | 39.05774    | 0.163914    | 238.2819039 |
| 35 | I03 | 33928 | CG3032  | 40.92081333 | 0.164521667 | 248.7259834 |
| 35 | I04 | 34456 | CG17379 | 33.93708    | 0.156292333 | 217.1384819 |
| 35 | I05 | 34349 | CG13947 | 33.31973333 | 0.138981667 | 239.7419324 |
| 35 | I06 | 34417 | CG14356 | 30.42810667 | 0.167816667 | 181.3175489 |
| 35 | I07 | 34329 | CG11425 | 29.97814    | 0.148916333 | 201.3086095 |
| 35 | I08 | 34433 | CG15425 | 29.74225667 | 0.155228667 | 191.6028612 |
| 35 | I09 | 34393 | CG14133 | 31.76335    | 0.140668667 | 225.8025952 |
| 35 | I10 | 34473 | CG2713  | 32.15780667 | 0.147039667 | 218.7015749 |
| 35 | I11 | 34401 | CG14217 | 47.88591    | 0.131206667 | 364.9655251 |
| 35 | I12 | 34489 | CG32353 | 37.40531667 | 0.129427    | 289.0070593 |
| 35 | I13 | 34409 | CG14315 | 32.41619    | 0.120480667 | 269.0571931 |
| 35 | I14 | 34497 | CG3330  | 31.26692667 | 0.126721    | 246.7383201 |
| 35 | I15 | 34321 | CG10637 | 28.26092333 | 0.100444333 | 281.3590612 |
| 35 | I16 | 34425 | CG15292 | 31.63665    | 0.111682333 | 283.2735407 |
| 35 | I17 | 34337 | CG12156 | 31.05198    | 0.114808333 | 270.4679974 |
| 35 | I18 | 34465 | CG17738 | 35.21979333 | 0.11708     | 300.818187  |
| 35 | I19 | 34345 | CG13527 | 36.54157    | 0.120847    | 302.378793  |
| 35 | I20 | 34505 | CG40279 | 29.40754667 | 0.101571    | 289.5269975 |
| 35 | I21 | 34384 | CG14113 | 35.80110667 | 0.115570333 | 309.7776534 |
| 35 | I22 | 34441 | CG17050 | 32.10461    | 0.121073667 | 265.1659183 |
| 35 | I23 | 34360 | CG13989 | 24.69216333 | 0.118604667 | 208.1888009 |
| 35 | I24 | 34513 | CG4170  | 22.99736667 | 0.103353667 | 222.5113768 |
| 35 | J01 | 33160 | CG1835  | 36.21682    | 0.163397    | 221.6492347 |
| 35 | J02 | 34612 | CG17299 | 22.45878667 | 0.221123    | 101.5669409 |
| 35 | J03 | 33164 | CG18482 | 34.74737    | 0.16539     | 210.0935365 |
| 35 | J04 | 34668 | CG8141  | 34.99339    | 0.157997667 | 221.4804227 |
| 35 | J05 | 33129 | CG1701  | 30.87763333 | 0.170459667 | 181.1433399 |
| 35 | J06 | 34597 | CG12787 | 29.55335    | 0.145740667 | 202.7803953 |
| 35 | J07 | 33137 | CG17385 | 32.83263667 | 0.182483667 | 179.920961  |
| 35 | J08 | 34605 | CG13762 | 29.61788667 | 0.151595333 | 195.3746597 |
| 35 | J09 | 33145 | CG17780 | 35.10056    | 0.132613667 | 264.6828256 |
| 35 | J10 | 34621 | CG31753 | 28.69997    | 0.189678    | 151.3089025 |
| 35 | J11 | 33123 | CG1660  | 35.81977333 | 0.139775    | 256.2673821 |

|    |     |       |         |             |             |             |
|----|-----|-------|---------|-------------|-------------|-------------|
| 35 | J12 | 34637 | CG3371  | 36.84573667 | 0.149493    | 246.4713175 |
| 35 | J13 | 34569 | CG8120  | 34.25954    | 0.130135    | 263.2615361 |
| 35 | J14 | 34645 | CG4631  | 32.70770333 | 0.118209    | 276.6938502 |
| 35 | J15 | 34521 | CG4360  | 12.21997333 | 0.193690667 | 63.09015062 |
| 35 | J16 | 34653 | CG6074  | 36.52280667 | 0.126091    | 289.6543502 |
| 35 | J17 | 34541 | CG5922  | 30.97455    | 0.106961333 | 289.5864238 |
| 35 | J18 | 34661 | CG6964  | 36.23568333 | 0.121431667 | 298.4039034 |
| 35 | J19 | 34577 | CG8502  | 32.90276    | 0.107914333 | 304.8970325 |
| 35 | J20 | 34677 | CG8927  | 31.33788667 | 0.108064    | 289.9937691 |
| 35 | J21 | 34537 | CG5691  | 25.00817    | 0.079267667 | 315.4901746 |
| 35 | J22 | 34672 | CG8427  | 25.06751667 | 0.172202333 | 145.5701336 |
| 35 | J23 | 34585 | CG10261 | 31.83492667 | 0.097283333 | 327.2392667 |
| 35 | J24 | 34592 | CG11213 | 32.96113667 | 0.089248    | 369.3207317 |
| 35 | K02 | 34451 | CG17270 | 32.35119667 | 0.136276667 | 237.3935132 |
| 35 | K03 | 33929 | CG30364 | 27.63795667 | 0.167034    | 165.4630594 |
| 35 | K04 | 34457 | CG17382 | 28.88376667 | 0.162354    | 177.9060982 |
| 35 | K05 | 34350 | CG13948 | 27.23514    | 0.175658333 | 155.0461028 |
| 35 | K06 | 34418 | CG14365 | 20.57632    | 0.158417333 | 129.8867969 |
| 35 | K07 | 34330 | CG11437 | 25.20213333 | 0.140286667 | 179.6473887 |
| 35 | K08 | 34434 | CG15611 | 27.55329667 | 0.142607    | 193.2113898 |
| 35 | K09 | 34394 | CG14135 | 27.39794    | 0.136047    | 201.3858446 |
| 35 | K1  | 33921 | CG30053 | 24.11525333 | 0.133045    | 181.2563669 |
| 35 | K10 | 34474 | CG3092  | 24.29233333 | 0.145016667 | 167.5140788 |
| 35 | K11 | 34402 | CG14238 | 26.50964667 | 0.128788667 | 205.8383502 |
| 35 | K12 | 34490 | CG32397 | 29.48999    | 0.134069    | 219.9612886 |
| 35 | K13 | 34410 | CG14317 | 24.66785667 | 0.129317    | 190.7549407 |
| 35 | K14 | 34498 | CG3598  | 26.72953667 | 0.118433333 | 225.6926822 |
| 35 | K15 | 34322 | CG10673 | 29.968      | 0.130179    | 230.2061008 |
| 35 | K16 | 34426 | CG15351 | 20.97470333 | 0.144088333 | 145.5683666 |
| 35 | K17 | 34381 | CG14089 | 30.08457    | 0.115644    | 260.148127  |
| 35 | K18 | 34466 | CG17745 | 26.81322667 | 0.103145667 | 259.9549504 |
| 35 | K19 | 34357 | CG13984 | 30.35529667 | 0.119880333 | 253.2133155 |
| 35 | K20 | 34506 | CG40280 | 29.45738    | 0.10864     | 271.1467231 |
| 35 | K21 | 34385 | CG14116 | 27.09066667 | 0.124707    | 217.2345311 |
| 35 | K22 | 34483 | CG32251 | 25.57272667 | 0.115173    | 222.0375146 |
| 35 | K23 | 34378 | CG14082 | 34.20777333 | 0.108332667 | 315.7660047 |
| 35 | K24 | 34516 | CG4252  | 31.50557333 | 0.115053333 | 273.8345115 |
| 35 | L01 | 33161 | CG18356 | 37.24054    | 0.155563    | 239.3920148 |
| 35 | L02 | 34613 | CG17598 | 27.73253667 | 0.179925667 | 154.1332995 |
| 35 | L03 | 33153 | CG18135 | 28.12460333 | 0.176084667 | 159.7220466 |
| 35 | L04 | 34669 | CG8216  | 31.62662    | 0.176152333 | 179.5413061 |
| 35 | L05 | 33130 | CG17078 | 29.44588667 | 0.158479333 | 185.8026914 |
| 35 | L06 | 34598 | CG13004 | 32.23841333 | 0.153728667 | 209.7098351 |
| 35 | L07 | 33138 | CG17388 | 26.41007333 | 0.139036333 | 189.9508761 |
| 35 | L08 | 34606 | CG13957 | 28.3496     | 0.163573667 | 173.3139605 |
| 35 | L09 | 33146 | CG17802 | 35.72104667 | 0.131312    | 272.0318529 |
| 35 | L10 | 34622 | CG31999 | 31.41211    | 0.127557    | 246.2593978 |
| 35 | L11 | 33124 | CG16735 | 28.30609333 | 0.137394333 | 206.0208208 |
| 35 | L12 | 34638 | CG3460  | 39.07429    | 0.192451333 | 203.0346546 |
| 35 | L13 | 34570 | CG8180  | 29.55681    | 0.118212667 | 250.0308202 |
| 35 | L14 | 34646 | CG4892  | 39.24233    | 0.106285333 | 369.2167938 |
| 35 | L15 | 34522 | CG4429  | 35.32834    | 0.118188333 | 298.915629  |
| 35 | L16 | 34654 | CG6189  | 27.89596667 | 0.136848333 | 203.8458634 |
| 35 | L17 | 34542 | CG6353  | 31.94704333 | 0.130222    | 245.3275432 |

|    |     |       |         |             |             |             |
|----|-----|-------|---------|-------------|-------------|-------------|
| 35 | L18 | 34662 | CG7004  | 27.98997667 | 0.115561333 | 242.2088415 |
| 35 | L19 | 34578 | CG8505  | 26.38186    | 0.111376333 | 236.8713281 |
| 35 | L20 | 34678 | CG9028  | 35.91098333 | 0.165087667 | 217.5267484 |
| 35 | L21 | 34551 | CG6685  | 34.79649667 | 0.110125667 | 315.9708152 |
| 35 | L22 | 34630 | CG32704 | 26.64912667 | 0.11756     | 226.6853238 |
| 35 | L23 | 34586 | CG10943 | 29.31603    | 0.104104667 | 281.6014972 |
| 35 | L24 | 34693 | CG10019 | 30.55177    | 0.099404333 | 307.3484724 |
| 35 | M01 | 33922 | CG3008  | 32.46659667 | 0.176386667 | 184.0649142 |
| 35 | M02 | 34449 | CG17244 | 31.96315333 | 0.156898333 | 203.7188838 |
| 35 | M03 | 33924 | CG30152 | 28.36911    | 0.153931667 | 184.2967767 |
| 35 | M04 | 34458 | CG17470 | 28.23766667 | 0.139217333 | 202.831544  |
| 35 | M05 | 34351 | CG13961 | 23.75064333 | 0.151482    | 156.7885513 |
| 35 | M06 | 34419 | CG14368 | 28.48181333 | 0.150543667 | 189.1930359 |
| 35 | M07 | 34331 | CG11462 | 25.54399333 | 0.145600333 | 175.439113  |
| 35 | M08 | 34435 | CG16960 | 26.75446667 | 0.148329    | 180.3724603 |
| 35 | M09 | 34395 | CG14137 | 24.66027667 | 0.128277667 | 192.2413878 |
| 35 | M10 | 34475 | CG31081 | 22.13316667 | 0.110461333 | 200.3702653 |
| 35 | M11 | 34403 | CG14269 | 23.93845    | 0.133414333 | 179.4293717 |
| 35 | M12 | 34491 | CG32417 | 27.90329    | 0.140379333 | 198.7706405 |
| 35 | M13 | 34411 | CG14323 | 23.64904    | 0.130741333 | 180.8841886 |
| 35 | M14 | 34499 | CG3695  | 19.94496    | 0.105107667 | 189.7574233 |
| 35 | M15 | 34364 | CG14004 | 26.59346333 | 0.118029333 | 225.3123235 |
| 35 | M16 | 34427 | CG15379 | 22.27791333 | 0.124114333 | 179.4950892 |
| 35 | M17 | 34382 | CG14095 | 23.65631    | 0.116525333 | 203.0143088 |
| 35 | M18 | 34467 | CG17776 | 23.22037    | 0.105590333 | 219.9099981 |
| 35 | M19 | 34347 | CG13931 | 23.88121333 | 0.104719667 | 228.0489816 |
| 35 | M20 | 34507 | CG40291 | 23.73493667 | 0.118028    | 201.0958134 |
| 35 | M21 | 34386 | CG14120 | 25.2794     | 0.110948667 | 227.8477134 |
| 35 | M22 | 34443 | CG17127 | 27.03899    | 0.104241667 | 259.387545  |
| 35 | M23 | 34379 | CG14086 | 29.76471667 | 0.102448667 | 290.5329824 |
| 35 | M24 | 34515 | CG4250  | 28.08825333 | 0.114046667 | 246.2873677 |
| 35 | N01 | 33162 | CG18368 | 23.40313    | 0.214743    | 108.982039  |
| 35 | N02 | 34614 | CG18011 | 28.68049    | 0.201719    | 142.1804094 |
| 35 | N03 | 33154 | CG18166 | 26.36523667 | 0.182370333 | 144.5697674 |
| 35 | N04 | 34670 | CG8239  | 30.82942333 | 0.202652    | 152.1298745 |
| 35 | N05 | 33131 | CG17137 | 22.96177667 | 0.17478     | 131.3753099 |
| 35 | N06 | 34599 | CG13299 | 24.47477    | 0.162240333 | 150.8550278 |
| 35 | N07 | 33139 | CG17462 | 28.92116    | 0.150512333 | 192.1514295 |
| 35 | N08 | 34607 | CG14230 | 29.60122333 | 0.225929    | 131.0200255 |
| 35 | N09 | 33147 | CG17885 | 29.96237333 | 0.154588333 | 193.8204047 |
| 35 | N10 | 34623 | CG32057 | 23.26104    | 0.133164333 | 174.6792059 |
| 35 | N11 | 34549 | CG6675  | 26.63165667 | 0.147808333 | 180.1769634 |
| 35 | N12 | 34639 | CG3576  | 25.98912    | 0.178631333 | 145.4902649 |
| 35 | N13 | 34571 | CG8204  | 24.21925333 | 0.140446667 | 172.4444866 |
| 35 | N14 | 34647 | CG5554  | 22.20727333 | 0.131309333 | 169.1218192 |
| 35 | N15 | 34553 | CG7073  | 7.956802333 | 0.149345667 | 53.27775831 |
| 35 | N16 | 34655 | CG6194  | 23.02025667 | 0.122346667 | 188.1559776 |
| 35 | N17 | 34582 | CG9192  | 25.44006667 | 0.129759    | 196.0562787 |
| 35 | N18 | 34663 | CG7018  | 23.28714    | 0.104017    | 223.8782122 |
| 35 | N19 | 34548 | CG6614  | 22.70368    | 0.111062333 | 204.4228616 |
| 35 | N20 | 34679 | CG9033  | 17.75558    | 0.148984    | 119.1777641 |
| 35 | N21 | 34552 | CG6691  | 28.05165    | 0.115433333 | 243.0116951 |
| 35 | N22 | 34631 | CG32736 | 30.02672333 | 0.118161333 | 254.1163212 |
| 35 | N23 | 34587 | CG10958 | 25.15509    | 0.118467667 | 212.3371778 |



|    |     |       |          |             |             |             |
|----|-----|-------|----------|-------------|-------------|-------------|
| 35 | N24 | 34694 | CG10077  | 23.15665    | 0.10376     | 223.1751157 |
| 35 | O01 | 33923 | CG3011   | 34.39234667 | 0.162454667 | 211.7042703 |
| 35 | O02 | 34477 | CG31901  | 35.05801333 | 0.15582     | 224.9904591 |
| 35 | O03 | 33931 | CG3062   | 26.87736    | 0.172996667 | 155.3634559 |
| 35 | O04 | 34459 | CG17534  | 36.85144    | 0.152767333 | 241.2259165 |
| 35 | O05 | 34352 | CG13965  | 33.55005667 | 0.182462    | 183.8742131 |
| 35 | O06 | 34420 | CG14414  | 32.27274    | 0.187490667 | 172.1298482 |
| 35 | O07 | 34332 | CG11533  | 31.67817    | 0.157675667 | 200.9071575 |
| 35 | O08 | 34436 | CG16989  | 30.01885667 | 0.190269    | 157.7706125 |
| 35 | O09 | 34396 | CG14142  | 31.22798333 | 0.143644333 | 217.3979482 |
| 35 | O10 | 34476 | CG31782  | 36.01702    | 0.132626    | 271.5683199 |
| 35 | O11 | 34404 | CG14270  | 31.64052    | 0.12338     | 256.4477225 |
| 35 | O12 | 34492 | CG32433  | 34.37568333 | 0.145558333 | 236.1643098 |
| 35 | O13 | 34356 | CG13983  | 30.02863333 | 0.132485    | 226.6568542 |
| 35 | O14 | 34500 | CG3697   | 29.23567333 | 0.131673    | 222.0324086 |
| 35 | O15 | 34324 | CG10930  | 30.00706333 | 0.119735    | 250.6122966 |
| 35 | O16 | 34479 | CG32070  | 32.86602667 | 0.134494667 | 244.3667655 |
| 35 | O17 | 34388 | CG14126  | 32.24177667 | 0.119534667 | 269.7274152 |
| 35 | O18 | 34481 | CG32221  | 32.85667333 | 0.131056667 | 250.7058524 |
| 35 | O19 | 34359 | CG13988  | 29.59505667 | 0.108520667 | 272.7135538 |
| 35 | O20 | 34482 | CG32246  | 30.87064333 | 0.114264667 | 270.1678851 |
| 35 | O21 |       | wt       | 110.1167    | 0.091687    | 1201.006686 |
| 35 | O22 |       | HFA17794 | 2.793135667 | 0.016595    | 168.3118811 |
| 35 | O23 |       | hpo      | 83.10682333 | 0.100373    | 827.9798684 |
| 35 | O24 |       | Luc      | 3.839180667 | 0.118776    | 32.32286545 |
| 35 | P01 | 33163 | CG18472  | 40.39018    | 0.229519667 | 175.9769896 |
| 35 | P02 | 34615 | CG18377  | 25.35155    | 0.172619    | 146.8641922 |
| 35 | P03 | 33155 | CG1819   | 34.3933     | 0.182474667 | 188.4826022 |
| 35 | P04 | 34671 | CG8421   | 33.8895     | 0.222685333 | 152.1855952 |
| 35 | P05 | 33132 | CG17176  | 31.91565    | 0.199702667 | 159.8158429 |
| 35 | P06 | 34600 | CG13306  | 33.50968333 | 0.155367    | 215.6808288 |
| 35 | P07 | 33140 | CG17520  | 17.59447333 | 0.186880667 | 94.14817299 |
| 35 | P08 | 34608 | CG14897  | 30.20517333 | 0.168064667 | 179.7235191 |
| 35 | P09 | 33148 | CG17921  | 27.05274    | 0.147927    | 182.8789876 |
| 35 | P10 | 34624 | CG32100  | 33.13873333 | 0.162688667 | 203.6941725 |
| 35 | P11 | 34540 | CG5878   | 31.73996333 | 0.152483    | 208.1541112 |
| 35 | P12 | 34640 | CG3585   | 26.61095667 | 0.145022667 | 183.4951548 |
| 35 | P13 | 34572 | CG8236   | 29.66066667 | 0.12479     | 237.6846435 |
| 35 | P14 | 34648 | CG5609   | 30.13176333 | 0.136194    | 221.2414889 |
| 35 | P15 | 34524 | CG4596   | 30.67522667 | 0.124780667 | 245.8331686 |
| 35 | P16 | 34656 | CG6407   | 27.89205    | 0.133127667 | 209.5135497 |
| 35 | P17 | 34532 | CG5272   | 34.1761     | 0.142051    | 240.5903514 |
| 35 | P18 | 34664 | CG7054   | 29.11261    | 0.120507667 | 241.5830528 |
| 35 | P19 | 34580 | CG9173   | 29.99272    | 0.120654333 | 248.5838608 |
| 35 | P20 | 34680 | CG9203   | 33.19607667 | 0.116318667 | 285.3890748 |
| 35 | P21 |       | wt       | 111.1928333 | 0.091418    | 1216.312251 |
| 35 | P22 |       | HFA17794 | 2.488478333 | 0.016469    | 151.100755  |
| 35 | P23 |       | hpo      | 85.93194333 | 0.106802    | 804.5911437 |
| 35 | P24 |       | Luc      | 3.578985667 | 0.107357667 | 33.33702918 |
